# Supplementary material for: Qualitative Shotgun Proteomics Strategy for Protein Expression Profiling of Fish Otoliths
Source: MDPI journal article supplement (doi:10.3390/biochem3030008), 2023-07-28
Supplement: s1 [file s1]

## 1. Supplementary Information

### Contents

|                                                                                                                                                                                                       |     |
|-------------------------------------------------------------------------------------------------------------------------------------------------------------------------------------------------------|-----|
| Table S1. Results of the shotgun proteomics analysis of male Atlantic Cod ( <i>Gadus morhua</i> ) proteins.....                                                                                       | 2   |
| Table S2. Results of the shotgun proteomics analysis of female Atlantic Cod ( <i>Gadus morhua</i> ) proteins.....                                                                                     | 81  |
| Table S3. The full list of the <b>302</b> most abundant proteins identified from male Atlantic Cod ( <i>Gadus morhua</i> ).....                                                                       | 179 |
| Table S4. The full list of the <b>247</b> most abundant proteins identified from female Atlantic Cod ( <i>Gadus morhua</i> ).....                                                                     | 190 |
| Table S5. According to the complete details of the protein description, there are <b>143</b> otolith core proteins, common between male and female Atlantic Cod ( <i>Gadus morhua</i> ) proteins..... | 199 |
| Table S6. According to the complete details of the protein description, the male Atlantic Cod ( <i>Gadus morhua</i> ) has <b>138</b> unique.....                                                      | 204 |
| Table S7. According to the complete details of the protein description, the female Atlantic Cod ( <i>Gadus morhua</i> ) has <b>67</b> unique.....                                                     | 210 |

Table S1. Results of the shotgun proteomics analysis of male Atlantic Cod (*Gadus morhua*) proteins

| Proteins<br>Unique<br>Sequence<br>ID | Master          | Accession   | Description                                                                                 | Coverage<br>in<br>Percent | Number<br>of<br>Peptides | Number<br>of<br>PSMs | Number<br>of<br>Unique<br>Peptides | Number<br>of AAs | MW<br>in<br>kDa | calc<br>pI | Score<br>Sequest<br>HT<br>Sequest<br>HT | Number<br>of<br>Peptides<br>by<br>Search<br>Engine<br>Sequest<br>HT | Number<br>of<br>Protein<br>Groups |
|--------------------------------------|-----------------|-------------|---------------------------------------------------------------------------------------------|---------------------------|--------------------------|----------------------|------------------------------------|------------------|-----------------|------------|-----------------------------------------|---------------------------------------------------------------------|-----------------------------------|
| -6E+18                               | IsMasterProtein | A0A8C5AFL5  | Tectorin alpha OS=Gadus morhua OX=8049 PE=4 SV=1                                            | 59                        | 107                      | 1500                 | 107                                | 2231             | 246             | 5.39       | 5231.5                                  | 107                                                                 | 1                                 |
| -5.6E+18                             | IsMasterProtein | A0A8C4ZL15  | Uncharacterized protein OS=Gadus morhua OX=8049 PE=4 SV=1                                   | 53                        | 68                       | 479                  | 68                                 | 1450             | 156.2           | 6.83       | 1644.8                                  | 68                                                                  | 1                                 |
| -9.2E+17                             | IsMasterProtein | A0A8C5F796  | Otogelin OS=Gadus morhua OX=8049 PE=4 SV=1                                                  | 28                        | 55                       | 271                  | 55                                 | 2599             | 283             | 6.28       | 951.19                                  | 55                                                                  | 1                                 |
| -1.2E+18                             | IsMasterProtein | A0A8C4Z5E9  | Uncharacterized protein OS=Gadus morhua OX=8049 PE=4 SV=1                                   | 41                        | 48                       | 128                  | 48                                 | 1483             | 162.9           | 6.06       | 453.32                                  | 48                                                                  | 1                                 |
| -7.9E+18                             | IsMasterProtein | A0A8C5A797  | Apolipoprotein Bb, tandem duplicate 1 OS=Gadus morhua OX=8049 PE=4 SV=1                     | 14                        | 41                       | 43                   | 41                                 | 3848             | 427.7           | 5.06       | 116.92                                  | 41                                                                  | 1                                 |
| -6.6E+18                             | IsMasterProtein | cRAP_P35908 | Keratin, type II cytoskeletal 2 epidermal OS=Homo sapiens GN=KRT2 PE=1 SV=2                 | 67                        | 44                       | 67                   | 39                                 | 639              | 65.4            | 8          | 220.8                                   | 44                                                                  | 1                                 |
| 6.01E+18                             | IsMasterProtein | A0A8C5CL43  | Otolin 1a OS=Gadus morhua OX=8049 PE=4 SV=1                                                 | 59                        | 39                       | 363                  | 39                                 | 470              | 48.4            | 8.27       | 1295.8                                  | 39                                                                  | 1                                 |
| -4E+18                               | IsMasterProtein | cRAP_P04264 | Keratin, type II cytoskeletal 1 OS=Homo sapiens GN=KRT1 PE=1 SV=6                           | 62                        | 43                       | 135                  | 38                                 | 644              | 66              | 8.12       | 484.34                                  | 43                                                                  | 1                                 |
| 4.44E+18                             | IsMasterProtein | A0A8C4Z1C2  | Filamin B OS=Gadus morhua OX=8049 GN=FLNB PE=3 SV=1                                         | 21                        | 38                       | 44                   | 38                                 | 2603             | 275.9           | 5.66       | 135.96                                  | 38                                                                  | 1                                 |
| 8.13E+18                             | IsMasterProtein | A0A8C4YTT7  | Fibronectin OS=Gadus morhua OX=8049 GN=fn1b PE=4 SV=1                                       | 21                        | 38                       | 47                   | 38                                 | 2362             | 258.7           | 5.95       | 133.47                                  | 38                                                                  | 1                                 |
| -7.5E+18                             | IsMasterProtein | A0A8C5BI23  | Spectrin alpha, non-erythrocytic 1 OS=Gadus morhua OX=8049 GN=SPTAN1 PE=3 SV=1              | 19                        | 36                       | 38                   | 36                                 | 2481             | 284.9           | 5.21       | 113.75                                  | 36                                                                  | 1                                 |
| -8.1E+18                             | IsMasterProtein | A0A8C5AMQ1  | Plasminogen OS=Gadus morhua OX=8049 GN=plg PE=3 SV=1                                        | 57                        | 34                       | 47                   | 34                                 | 791              | 88              | 7.09       | 145.99                                  | 34                                                                  | 1                                 |
| -7E+18                               | IsMasterProtein | A0A8C4Z9E7  | Dynein, cytoplasmic 1, heavy chain 1 OS=Gadus morhua OX=8049 GN=DYNC1H1 PE=3 SV=1           | 10                        | 34                       | 35                   | 34                                 | 4640             | 533.3           | 6.39       | 104.19                                  | 34                                                                  | 1                                 |
| -3.4E+18                             | IsMasterProtein | A0A8C5AZT6  | Myosin, heavy chain 9b, non-muscle OS=Gadus morhua OX=8049 GN=myh9b PE=3 SV=1               | 24                        | 34                       | 40                   | 31                                 | 1954             | 226.3           | 5.6        | 114.15                                  | 34                                                                  | 1                                 |
| -4.5E+17                             | IsMasterProtein | A0A8C4ZM93  | Uncharacterized LOC115542114 OS=Gadus morhua OX=8049 GN=si:ch211-243g18.2 PE=3 SV=1         | 68                        | 33                       | 80                   | 31                                 | 426              | 48.5            | 6.16       | 268.99                                  | 33                                                                  | 1                                 |
| 3.34E+18                             | IsMasterProtein | A0A8C4YVX1  | Keratin, type I cytoskeletal 18-like OS=Gadus morhua OX=8049 GN=LOC115539991 PE=3 SV=1      | 82                        | 32                       | 40                   | 30                                 | 448              | 49.7            | 6.09       | 115.95                                  | 32                                                                  | 1                                 |
| 7.99E+18                             | IsMasterProtein | cRAP_P35527 | Keratin, type I cytoskeletal 9 OS=Homo sapiens GN=KRT9 PE=1 SV=3                            | 54                        | 29                       | 73                   | 29                                 | 623              | 62              | 5.24       | 285.96                                  | 29                                                                  | 1                                 |
| 1.39E+18                             | IsMasterProtein | A0A8C4YSX2  | Keratin 8 OS=Gadus morhua OX=8049 PE=3 SV=1                                                 | 47                        | 40                       | 71                   | 27                                 | 699              | 75.6            | 7.87       | 218.25                                  | 40                                                                  | 1                                 |
| -4.7E+17                             | IsMasterProtein | A0A8C5BZ34  | Alpha-2-macroglobulin-like OS=Gadus morhua OX=8049 GN=LOC115560909 PE=3 SV=1                | 23                        | 26                       | 31                   | 26                                 | 1464             | 163.4           | 5.82       | 103.04                                  | 26                                                                  | 1                                 |
| -8.7E+18                             | IsMasterProtein | A0A8C5FEZ3  | Thrombospondin 1b OS=Gadus morhua OX=8049 GN=thbs1b PE=3 SV=1                               | 27                        | 28                       | 37                   | 25                                 | 1175             | 130             | 4.98       | 102.08                                  | 28                                                                  | 1                                 |
| 2.15E+18                             | IsMasterProtein | A0A8C5AFR1  | Intermediate filament protein ON3-like OS=Gadus morhua OX=8049 GN=si:dkey-222f2.1 PE=3 SV=1 | 59                        | 32                       | 55                   | 24                                 | 449              | 50.6            | 5.66       | 158.12                                  | 32                                                                  | 1                                 |
| -9.1E+18                             | IsMasterProtein | A0A8C5CWX1  | Pyruvate carboxylase OS=Gadus morhua OX=8049 GN=pc PE=4 SV=1                                | 25                        | 22                       | 24                   | 22                                 | 1186             | 130             | 6.68       | 66.23                                   | 22                                                                  | 1                                 |
| -4.2E+18                             | IsMasterProtein | cRAP_P13645 | Keratin, type I cytoskeletal 10 OS=Homo sapiens GN=KRT10 PE=1 SV=6                          | 57                        | 28                       | 55                   | 22                                 | 584              | 58.8            | 5.21       | 192.83                                  | 28                                                                  | 1                                 |
| -2.6E+18                             | IsMasterProtein | A0A8C4Z237  | Transitional endoplasmic reticulum ATPase OS=Gadus morhua OX=8049 GN=vcp PE=3 SV=1          | 37                        | 22                       | 24                   | 22                                 | 791              | 88              | 5.39       | 71.5                                    | 22                                                                  | 1                                 |
| -8.8E+18                             | IsMasterProtein | A0A8C5B602  | Keratin 94 OS=Gadus morhua OX=8049 PE=3 SV=1                                                | 57                        | 25                       | 44                   | 21                                 | 447              | 49.7            | 5.27       | 134.01                                  | 25                                                                  | 1                                 |
| -3.4E+18                             | IsMasterProtein | A0A8C5AGK0  | ATP synthase subunit alpha OS=Gadus morhua OX=8049 GN=atp5fa1 PE=3 SV=1                     | 41                        | 21                       | 31                   | 21                                 | 551              | 59.7            | 8.9        | 93.88                                   | 21                                                                  | 1                                 |
| -7.3E+17                             | IsMasterProtein | A0A8C4Z0D5  | Uncharacterized protein OS=Gadus morhua OX=8049 PE=3 SV=1                                   | 31                        | 21                       | 27                   | 21                                 | 806              | 90.5            | 7.02       | 82.66                                   | 21                                                                  | 1                                 |
| 2.92E+17                             | IsMasterProtein | A0A8C4YWD2  | Fibrinogen gamma chain OS=Gadus morhua OX=8049 GN=fgg PE=4 SV=1                             | 55                        | 21                       | 39                   | 21                                 | 425              | 48.2            | 5.19       | 126.27                                  | 21                                                                  | 1                                 |
| 1.75E+18                             | IsMasterProtein | A0A8C5BRA4  | Prothrombin OS=Gadus morhua OX=8049 PE=4 SV=1                                               | 42                        | 21                       | 28                   | 21                                 | 592              | 66.5            | 6.13       | 87.99                                   | 21                                                                  | 1                                 |
| -2.2E+18                             | IsMasterProtein | A0A8C5B0N5  | 72 kDa type IV collagenase OS=Gadus morhua OX=8049 PE=3 SV=1                                | 34                        | 20                       | 29                   | 20                                 | 658              | 73.9            | 5.2        | 91.94                                   | 20                                                                  | 1                                 |

|          |                 |            |                                                                                                             |    |    |     |    |      |       |      |        |    |   |
|----------|-----------------|------------|-------------------------------------------------------------------------------------------------------------|----|----|-----|----|------|-------|------|--------|----|---|
| -1.2E+17 | IsMasterProtein | A0A8C4Z1V4 | Uncharacterized protein OS=Gadus morhua OX=8049 PE=3 SV=1                                                   | 75 | 26 | 141 | 20 | 307  | 33.4  | 5.44 | 497.88 | 26 | 1 |
| 9.66E+16 | IsMasterProtein | A0A8C5CSX4 | Neurocan b OS=Gadus morhua OX=8049 PE=4 SV=1                                                                | 16 | 20 | 24  | 20 | 1604 | 174.3 | 5.64 | 67.98  | 20 | 1 |
| -8.4E+18 | IsMasterProtein | A0A8C5B0S5 | Protein disulfide-isomerase OS=Gadus morhua OX=8049 PE=3 SV=1                                               | 43 | 19 | 26  | 19 | 500  | 56    | 4.74 | 79.35  | 19 | 1 |
| -3.5E+18 | IsMasterProtein | A0A8C5C6C3 | Uncharacterized protein OS=Gadus morhua OX=8049 PE=4 SV=1                                                   | 17 | 20 | 27  | 19 | 1644 | 186.8 | 6.46 | 83.55  | 20 | 1 |
| 4.64E+18 | IsMasterProtein | A0A8C4ZB43 | Matrilin 4 OS=Gadus morhua OX=8049 PE=4 SV=1                                                                | 39 | 19 | 22  | 19 | 656  | 72    | 5.48 | 70.51  | 19 | 1 |
| -9E+18   | IsMasterProtein | A0A8C4ZH36 | Apolipoprotein Eb OS=Gadus morhua OX=8049 GN=apoeb PE=3 SV=1                                                | 77 | 18 | 36  | 18 | 275  | 30.6  | 4.96 | 117.84 | 18 | 1 |
| -7.8E+18 | IsMasterProtein | A0A8C5FBY0 | Protein disulfide-isomerase OS=Gadus morhua OX=8049 GN=pdia3 PE=3 SV=1                                      | 43 | 18 | 29  | 18 | 499  | 55.2  | 5.43 | 87.17  | 18 | 1 |
| -5.4E+18 | IsMasterProtein | A0A8C5B8L9 | Aggrecan core protein-like OS=Gadus morhua OX=8049 GN=LOC115559095 PE=4 SV=1                                | 15 | 18 | 25  | 18 | 1547 | 161.8 | 4.64 | 82.2   | 18 | 1 |
| -4.3E+18 | IsMasterProtein | A0A8C5BC92 | Uncharacterized protein OS=Gadus morhua OX=8049 PE=4 SV=1                                                   | 16 | 18 | 21  | 18 | 6897 | 733   | 5.6  | 53.43  | 18 | 1 |
| -4E+18   | IsMasterProtein | A0A8C5FUT7 | Aspartate aminotransferase OS=Gadus morhua OX=8049 GN=got2b PE=3 SV=1                                       | 57 | 18 | 32  | 18 | 401  | 44.2  | 8.5  | 108.25 | 18 | 1 |
| 2.08E+18 | IsMasterProtein | A0A8C4ZF74 | Decorin OS=Gadus morhua OX=8049 GN=lum PE=3 SV=1                                                            | 43 | 18 | 37  | 18 | 437  | 48.7  | 9.6  | 130.43 | 18 | 1 |
| 5.14E+18 | IsMasterProtein | A0A8C4Z0D0 | Interferon stimulated exonuclease gene 20-like 2 OS=Gadus morhua OX=8049 GN=isg2012 PE=4 SV=1               | 17 | 19 | 30  | 18 | 1247 | 135.3 | 4.44 | 93.03  | 19 | 1 |
| -8.5E+18 | IsMasterProtein | A0A8C5ASM5 | Sodium/potassium-transporting ATPase subunit alpha OS=Gadus morhua OX=8049 GN=atp1a3b PE=3 SV=1             | 29 | 28 | 38  | 17 | 989  | 108.9 | 5.47 | 114.23 | 28 | 1 |
| -3.2E+18 | IsMasterProtein | A0A8C4ZHY1 | Chondroadherin-like b OS=Gadus morhua OX=8049 GN=chadlb PE=3 SV=1                                           | 27 | 17 | 20  | 17 | 773  | 85.6  | 8.62 | 60.93  | 17 | 1 |
| -9.2E+17 | IsMasterProtein | A0A8C5AT89 | SERPIN domain-containing protein OS=Gadus morhua OX=8049 PE=3 SV=1                                          | 42 | 17 | 45  | 17 | 411  | 45.6  | 5.63 | 142.29 | 17 | 1 |
| 7.24E+18 | IsMasterProtein | A0A8C5B373 | Keratin 8 OS=Gadus morhua OX=8049 PE=3 SV=1                                                                 | 48 | 29 | 56  | 17 | 537  | 56.7  | 5.58 | 157.03 | 29 | 1 |
| -5.8E+18 | IsMasterProtein | A0A8C5F8B1 | Adaptor related protein complex 3 subunit delta 1 OS=Gadus morhua OX=8049 PE=3 SV=1                         | 19 | 16 | 24  | 16 | 1089 | 122.6 | 8.03 | 79.36  | 16 | 1 |
| -4.6E+18 | IsMasterProtein | A0A8C5D2V1 | SERPIN domain-containing protein OS=Gadus morhua OX=8049 PE=3 SV=1                                          | 44 | 16 | 59  | 16 | 414  | 46.6  | 5.08 | 206.95 | 16 | 1 |
| -2.8E+18 | IsMasterProtein | A0A8C5D5T9 | AP-3 complex subunit beta OS=Gadus morhua OX=8049 GN=ap3b2 PE=3 SV=1                                        | 18 | 16 | 21  | 16 | 985  | 110.1 | 5.9  | 58.99  | 16 | 1 |
| -1.7E+18 | IsMasterProtein | A0A8C4ZAY7 | Fibrinogen beta chain OS=Gadus morhua OX=8049 GN=fgb PE=4 SV=1                                              | 40 | 16 | 26  | 16 | 484  | 54    | 6.96 | 82.36  | 16 | 1 |
| 3.17E+18 | IsMasterProtein | A0A8C5FU23 | Procollagen-lysine 5-dioxygenase OS=Gadus morhua OX=8049 GN=plod3 PE=4 SV=1                                 | 28 | 16 | 17  | 16 | 741  | 85.7  | 6.98 | 47.97  | 16 | 1 |
| 3.34E+18 | IsMasterProtein | A0A8C5AKI2 | Sodium/potassium-transporting ATPase subunit beta OS=Gadus morhua OX=8049 GN=atp1b1b PE=3 SV=1              | 42 | 16 | 21  | 16 | 300  | 34.5  | 6.79 | 66.9   | 16 | 1 |
| -8.9E+18 | IsMasterProtein | A0A8C5FK28 | Nucleolin OS=Gadus morhua OX=8049 PE=4 SV=1                                                                 | 36 | 15 | 19  | 15 | 464  | 49.7  | 5.05 | 52.9   | 15 | 1 |
| -8.6E+18 | IsMasterProtein | A0A8C5BBZ7 | 78 kDa glucose-regulated protein OS=Gadus morhua OX=8049 GN=hspa5 PE=3 SV=1                                 | 34 | 18 | 28  | 15 | 656  | 72.4  | 5.07 | 82.24  | 18 | 1 |
| -2.7E+18 | IsMasterProtein | A0A8C5CWG9 | Uncharacterized protein OS=Gadus morhua OX=8049 PE=3 SV=1                                                   | 27 | 20 | 21  | 15 | 890  | 102.2 | 5.19 | 65.33  | 20 | 1 |
| 9.18E+18 | IsMasterProtein | A0A8C5CQP6 | Eukaryotic translation elongation factor 2 OS=Gadus morhua OX=8049 GN=eef2 PE=3 SV=1                        | 19 | 15 | 18  | 15 | 858  | 95.6  | 6.77 | 47.58  | 15 | 1 |
| -7.8E+18 | IsMasterProtein | A0A8C4YVZ2 | Carboxylic ester hydrolase OS=Gadus morhua OX=8049 PE=3 SV=1                                                | 30 | 14 | 31  | 14 | 555  | 60.6  | 5.53 | 101.66 | 14 | 1 |
| -5.1E+18 | IsMasterProtein | A0A8C4YVJ7 | Serpin peptidase inhibitor, clade C (antithrombin), member 1 OS=Gadus morhua OX=8049 GN=serpincl1 PE=3 SV=1 | 36 | 14 | 16  | 14 | 449  | 50.9  | 5.38 | 47.28  | 14 | 1 |
| 3.03E+18 | IsMasterProtein | A0A8C4Z4K1 | Sodium/potassium-transporting ATPase subunit alpha OS=Gadus morhua OX=8049 GN=atp1a1a.1 PE=3 SV=1           | 30 | 26 | 39  | 14 | 1026 | 112.9 | 5.55 | 113.53 | 26 | 1 |
| -9.2E+18 | IsMasterProtein | A0A8C5BGE1 | Uncharacterized LOC115541375 OS=Gadus morhua OX=8049 GN=LOC115541375 PE=4 SV=1                              | 18 | 13 | 13  | 13 | 858  | 93.5  | 8.1  | 36.22  | 13 | 1 |
| -8.9E+18 | IsMasterProtein | A0A8C5AI73 | Secreted protein, acidic, cysteine-rich (osteonectin) OS=Gadus morhua OX=8049 GN=sparc PE=3 SV=1            | 54 | 13 | 23  | 13 | 298  | 33.7  | 4.87 | 79.21  | 13 | 1 |
| -7.7E+18 | IsMasterProtein | A0A8C4Z902 | Protein Z-dependent protease inhibitor-like OS=Gadus morhua OX=8049 GN=LOC115534600 PE=3 SV=1               | 45 | 13 | 26  | 13 | 409  | 45.1  | 6.7  | 95.48  | 13 | 1 |
| -7.3E+18 | IsMasterProtein | A0A8C4Z566 | Plectin b OS=Gadus morhua OX=8049 PE=4 SV=1                                                                 | 4  | 13 | 14  | 13 | 4650 | 531.2 | 6.58 | 33.62  | 13 | 1 |
| -6.8E+18 | IsMasterProtein | A0A8C5ADH8 | Aconitate hydratase, mitochondrial OS=Gadus morhua OX=8049 GN=ACO2 PE=3 SV=1                                | 33 | 18 | 21  | 13 | 795  | 86.2  | 6.98 | 65.57  | 18 | 1 |
| -4.7E+18 | IsMasterProtein | B8XJS4     | Hemoglobin alpha 1 OS=Gadus morhua OX=8049 GN=HbA1 PE=2 SV=1                                                | 57 | 13 | 41  | 13 | 143  | 15.9  | 9.36 | 108.36 | 13 | 1 |
| -2.5E+18 | IsMasterProtein | A0A8C5BQI6 | SERPIN domain-containing protein OS=Gadus morhua OX=8049 PE=3 SV=1                                          | 34 | 13 | 17  | 13 | 455  | 50    | 5.81 | 53.59  | 13 | 1 |

|          |                 |            |                                                                                                                  |    |    |    |    |      |       |      |        |    |   |
|----------|-----------------|------------|------------------------------------------------------------------------------------------------------------------|----|----|----|----|------|-------|------|--------|----|---|
| -2.1E+17 | IsMasterProtein | A0A8C5A8C5 | Alpha-2-HS-glycoprotein-like OS=Gadus morhua OX=8049 GN=LOC115555905 PE=4 SV=1                                   | 50 | 13 | 22 | 13 | 295  | 32.3  | 7.18 | 70.43  | 13 | 1 |
| 6.36E+17 | IsMasterProtein | A0A8C4ZI26 | Heat shock protein 90, alpha (cytosolic), class A member 1, tandem duplicate 2 OS=Gadus morhua OX=8049 PE=3 SV=1 | 38 | 22 | 31 | 13 | 731  | 83.9  | 5.01 | 96.32  | 22 | 1 |
| 1.67E+18 | IsMasterProtein | A0A8C4ZDY0 | Hyaluronan and proteoglycan link protein 1-like OS=Gadus morhua OX=8049 GN=LOC115545700 PE=4 SV=1                | 60 | 13 | 41 | 13 | 340  | 37.9  | 5.2  | 141.08 | 13 | 1 |
| 7.14E+18 | IsMasterProtein | A0A8C4Z128 | Glypican-1 OS=Gadus morhua OX=8049 GN=gpc1b PE=3 SV=1                                                            | 34 | 13 | 17 | 13 | 550  | 60.8  | 5.86 | 49.56  | 13 | 1 |
| -7.5E+18 | IsMasterProtein | A0A8C4Z8U4 | Tubulin beta chain OS=Gadus morhua OX=8049 GN=tubb6 PE=3 SV=1                                                    | 55 | 21 | 45 | 12 | 445  | 49.8  | 4.89 | 129.45 | 21 | 1 |
| -6.3E+18 | IsMasterProtein | A0A8C5A9S9 | Hypoxia up-regulated 1 OS=Gadus morhua OX=8049 GN=hyou1 PE=3 SV=1                                                | 16 | 12 | 13 | 12 | 964  | 107.9 | 5.26 | 31.8   | 12 | 1 |
| -6E+18   | IsMasterProtein | A0A8C5AKB1 | Carboxypeptidase E OS=Gadus morhua OX=8049 GN=cpe PE=3 SV=1                                                      | 34 | 12 | 15 | 12 | 456  | 51.5  | 4.98 | 45.52  | 12 | 1 |
| -5.6E+18 | IsMasterProtein | A0A8C4ZM89 | Triosephosphate isomerase OS=Gadus morhua OX=8049 PE=3 SV=1                                                      | 49 | 12 | 16 | 12 | 258  | 27.9  | 7.77 | 50.86  | 12 | 1 |
| -5.2E+18 | IsMasterProtein | A0A8C4ZVQ3 | Tectorin beta OS=Gadus morhua OX=8049 PE=4 SV=1                                                                  | 42 | 12 | 84 | 12 | 324  | 35.8  | 7.91 | 262.31 | 12 | 1 |
| -4.4E+18 | IsMasterProtein | A0A8C4ZQT0 | Clusterin OS=Gadus morhua OX=8049 GN=clu PE=3 SV=1                                                               | 29 | 12 | 24 | 12 | 478  | 54    | 5.25 | 77.71  | 12 | 1 |
| -4.2E+18 | IsMasterProtein | A0A8C5B5V2 | Ubiquitin-like modifier activating enzyme 1 OS=Gadus morhua OX=8049 GN=uba1 PE=3 SV=1                            | 14 | 12 | 12 | 12 | 1051 | 117.4 | 5.45 | 32.95  | 12 | 1 |
| -1.9E+18 | IsMasterProtein | A0A8C5AWR7 | Glutathione S-transferase OS=Gadus morhua OX=8049 PE=3 SV=1                                                      | 58 | 12 | 23 | 12 | 210  | 23.6  | 8.88 | 71.43  | 12 | 1 |
| -1.3E+18 | IsMasterProtein | A0A8C5FHR5 | Apolipoprotein A-IV-like OS=Gadus morhua OX=8049 GN=LOC115535852 PE=3 SV=1                                       | 67 | 12 | 24 | 12 | 256  | 28.6  | 4.74 | 86.33  | 12 | 1 |
| 5.21E+18 | IsMasterProtein | A0A8C4ZSL9 | Angiotensinogen OS=Gadus morhua OX=8049 PE=3 SV=1                                                                | 37 | 12 | 16 | 12 | 456  | 50.3  | 5.08 | 60.16  | 12 | 1 |
| -8.9E+18 | IsMasterProtein | A0A8C5C777 | Endoplasmic-like OS=Gadus morhua OX=8049 GN=LOC115550943 PE=3 SV=1                                               | 19 | 18 | 21 | 11 | 813  | 93.5  | 5.14 | 57.74  | 18 | 1 |
| -8.9E+18 | IsMasterProtein | A0A8C5AWS6 | High density lipoprotein binding protein a OS=Gadus morhua OX=8049 PE=4 SV=1                                     | 13 | 11 | 14 | 11 | 1277 | 141.8 | 6.73 | 38.01  | 11 | 1 |
| -8.8E+18 | IsMasterProtein | A0A8C5CSC6 | Cochlin OS=Gadus morhua OX=8049 PE=4 SV=1                                                                        | 41 | 11 | 16 | 11 | 503  | 54.2  | 7.68 | 61.42  | 11 | 1 |
| -8.4E+18 | IsMasterProtein | A0A8C5AEV9 | Aldehyde dehydrogenase 1 family, member A3 OS=Gadus morhua OX=8049 GN=aldh1a3 PE=3 SV=1                          | 32 | 11 | 14 | 11 | 420  | 46.2  | 7.62 | 42.1   | 11 | 1 |
| -7.9E+18 | IsMasterProtein | A0A8C5CLM6 | Protein disulfide-isomerase OS=Gadus morhua OX=8049 GN=pdia4 PE=3 SV=1                                           | 23 | 11 | 13 | 11 | 657  | 73.1  | 5.03 | 36.54  | 11 | 1 |
| -4.4E+18 | IsMasterProtein | B3F9E2     | Hemoglobin alpha chain OS=Gadus morhua OX=8049 PE=3 SV=1                                                         | 66 | 11 | 70 | 11 | 143  | 15.8  | 8.76 | 245.8  | 11 | 1 |
| -2E+18   | IsMasterProtein | A0A8C4Z6P9 | Citrate synthase OS=Gadus morhua OX=8049 GN=cs PE=3 SV=1                                                         | 36 | 11 | 14 | 11 | 446  | 49.6  | 6.96 | 37.85  | 11 | 1 |
| -3.4E+17 | IsMasterProtein | A0A8C5A5H1 | Spectrin repeat containing, nuclear envelope 1b OS=Gadus morhua OX=8049 PE=3 SV=1                                | 2  | 11 | 11 | 11 | 8206 | 932.9 | 5.45 | 25.91  | 11 | 1 |
| 2.2E+18  | IsMasterProtein | A0A8C5CVL7 | Unconventional myosin-VI OS=Gadus morhua OX=8049 GN=MYO6 PE=3 SV=1                                               | 12 | 13 | 14 | 11 | 1268 | 145.9 | 8.63 | 43.04  | 13 | 1 |
| 6.95E+18 | IsMasterProtein | A0A8C5AYQ8 | Neuroblast differentiation-associated protein AHNK-like OS=Gadus morhua OX=8049 GN=LOC115544456 PE=4 SV=1        | 3  | 11 | 12 | 11 | 5433 | 585.7 | 5.31 | 25.77  | 11 | 1 |
| -8.6E+18 | IsMasterProtein | A0A8C5CEI3 | Hemopexin-like OS=Gadus morhua OX=8049 GN=LOC115542094 PE=4 SV=1                                                 | 50 | 14 | 41 | 10 | 426  | 47.8  | 6.05 | 133.18 | 14 | 1 |
| -8.5E+18 | IsMasterProtein | A0A8C5BYK4 | Fatty acid synthase OS=Gadus morhua OX=8049 PE=4 SV=1                                                            | 7  | 10 | 10 | 10 | 2509 | 271.1 | 6.46 | 27.82  | 10 | 1 |
| -8.4E+18 | IsMasterProtein | A0A8C5CR37 | Vesicle-fusing ATPase OS=Gadus morhua OX=8049 GN=nsfa PE=3 SV=1                                                  | 18 | 10 | 11 | 10 | 768  | 84.6  | 6.81 | 34.18  | 10 | 1 |
| -8.3E+18 | IsMasterProtein | A0A8C4Z1Z7 | ATP synthase subunit b OS=Gadus morhua OX=8049 GN=atp5pb PE=3 SV=1                                               | 37 | 10 | 13 | 10 | 251  | 27.5  | 9.16 | 40.79  | 10 | 1 |
| -7.6E+18 | IsMasterProtein | A0A8C4ZQM6 | Uncharacterized protein OS=Gadus morhua OX=8049 PE=4 SV=1                                                        | 18 | 10 | 11 | 10 | 741  | 83.5  | 6.44 | 33.7   | 10 | 1 |
| -7.3E+18 | IsMasterProtein | A0A8C5B761 | Uncharacterized protein OS=Gadus morhua OX=8049 PE=4 SV=1                                                        | 19 | 10 | 14 | 10 | 613  | 67.3  | 5.34 | 40.19  | 10 | 1 |
| -7E+18   | IsMasterProtein | A0A8C5A569 | Transcription factor-like 5 protein OS=Gadus morhua OX=8049 GN=LOC115545896 PE=4 SV=1                            | 5  | 10 | 20 | 10 | 3350 | 358.5 | 8.91 | 51.14  | 10 | 1 |
| -6.4E+18 | IsMasterProtein | A0A8C4YZT8 | Acetyltransferase component of pyruvate dehydrogenase complex OS=Gadus morhua OX=8049 GN=DLAT PE=3 SV=1          | 17 | 10 | 10 | 10 | 639  | 67.2  | 8.18 | 27.23  | 10 | 1 |
| -6.2E+18 | IsMasterProtein | A0A8C4ZH16 | Coagulation factor XIII, A1 polypeptide b OS=Gadus morhua OX=8049 PE=3 SV=1                                      | 19 | 10 | 10 | 10 | 739  | 82.3  | 5.68 | 27.03  | 10 | 1 |
| -6E+18   | IsMasterProtein | A0A8C5C4Z2 | Uncharacterized protein OS=Gadus morhua OX=8049 PE=4 SV=1                                                        | 12 | 15 | 15 | 10 | 1571 | 176.8 | 6.61 | 39.47  | 15 | 1 |
| -4.6E+18 | IsMasterProtein | A0A8C5FMY9 | Acetoacetyl-CoA synthetase OS=Gadus morhua OX=8049 GN=si:dkey-215k6.1 PE=3 SV=1                                  | 13 | 10 | 10 | 10 | 1163 | 123.7 | 5.95 | 27.91  | 10 | 1 |
| -1.6E+18 | IsMasterProtein | A0A8C4Z1I7 | Prominin 2 OS=Gadus morhua OX=8049 GN=prom2 PE=3 SV=1                                                            | 17 | 10 | 13 | 10 | 827  | 90.2  | 5.55 | 44.75  | 10 | 1 |

|          |                 |             |                                                                                                                         |    |    |    |    |      |       |      |        |    |   |
|----------|-----------------|-------------|-------------------------------------------------------------------------------------------------------------------------|----|----|----|----|------|-------|------|--------|----|---|
| 1.9E+17  | IsMasterProtein | A0A8C4ZAZ7  | Fib. alpha domain-containing protein OS=Gadus morhua OX=8049 PE=4 SV=1                                                  | 26 | 10 | 16 | 10 | 467  | 49    | 7.09 | 47.69  | 10 | 1 |
| 5.49E+17 | IsMasterProtein | A8CZB9      | Carbonyl reductase (NADPH) OS=Gadus morhua OX=8049 GN=cbr1 PE=2 SV=1                                                    | 43 | 10 | 12 | 10 | 275  | 30    | 7.84 | 40.09  | 10 | 1 |
| 7.73E+17 | IsMasterProtein | A0A8C4ZQU1  | Coatomer subunit alpha OS=Gadus morhua OX=8049 PE=4 SV=1                                                                | 9  | 10 | 10 | 10 | 1231 | 138.7 | 7.66 | 28.46  | 10 | 1 |
| 1.72E+18 | IsMasterProtein | A0A8C5AIV9  | Insulin-like growth factor 2 receptor OS=Gadus morhua OX=8049 GN=igf2r PE=4 SV=1                                        | 5  | 10 | 10 | 10 | 2284 | 249   | 5.92 | 24.07  | 10 | 1 |
| 5.64E+18 | IsMasterProtein | A0A8C4ZBJ9  | Anaphylatoxin-like domain-containing protein OS=Gadus morhua OX=8049 PE=4 SV=1                                          | 16 | 18 | 24 | 10 | 1469 | 163.8 | 6.9  | 69.24  | 18 | 1 |
| -9.2E+18 | IsMasterProtein | A0A8C4ZT52  | Spectrin beta chain OS=Gadus morhua OX=8049 GN=SPTBN1 PE=3 SV=1                                                         | 9  | 16 | 16 | 9  | 2345 | 270.4 | 5.58 | 44.26  | 16 | 1 |
| -8.9E+18 | IsMasterProtein | A0A8C4YZP8  | Malate dehydrogenase OS=Gadus morhua OX=8049 GN=MDH1 PE=3 SV=1                                                          | 42 | 11 | 15 | 9  | 324  | 35.1  | 7.06 | 43.91  | 11 | 1 |
| -6.8E+18 | IsMasterProtein | A0A8C5CJ72  | Glutamine synthetase OS=Gadus morhua OX=8049 GN=LOC115549024 PE=3 SV=1                                                  | 33 | 9  | 14 | 9  | 421  | 47.4  | 6.64 | 47.19  | 9  | 1 |
| -6.4E+18 | IsMasterProtein | A0A8C4ZFE7  | Serpin peptidase inhibitor, clade D (heparin cofactor), member 1 OS=Gadus morhua OX=8049 PE=3 SV=1                      | 19 | 9  | 16 | 9  | 507  | 57.7  | 6.2  | 43.3   | 9  | 1 |
| -6.3E+18 | IsMasterProtein | A0A8C5FME8  | Hydroxyacyl-CoA dehydrogenase trifunctional multienzyme complex subunit beta OS=Gadus morhua OX=8049 GN=hadhb PE=3 SV=1 | 20 | 9  | 12 | 9  | 484  | 51.7  | 9.45 | 38.96  | 9  | 1 |
| -6E+18   | IsMasterProtein | A0A8C4ZHL1  | Serpin peptidase inhibitor, clade G (C1 inhibitor), member 1 OS=Gadus morhua OX=8049 PE=3 SV=1                          | 22 | 9  | 17 | 9  | 480  | 52.7  | 6.58 | 56.7   | 9  | 1 |
| -5.9E+18 | IsMasterProtein | A0A8C4Z7S3  | AP-3 complex subunit mu-2 OS=Gadus morhua OX=8049 GN=ap3m2 PE=3 SV=1                                                    | 27 | 9  | 14 | 9  | 418  | 46.9  | 7.53 | 36.73  | 9  | 1 |
| -5.6E+18 | IsMasterProtein | A0A8C5CC77  | Dolichyl-diphosphooligosaccharide--protein glycosyltransferase subunit 1 OS=Gadus morhua OX=8049 PE=3 SV=1              | 19 | 9  | 12 | 9  | 597  | 67    | 6.21 | 42.92  | 9  | 1 |
| -5.5E+18 | IsMasterProtein | A0A8C4Z6G9  | EH-domain containing 1a OS=Gadus morhua OX=8049 PE=4 SV=1                                                               | 32 | 12 | 13 | 9  | 533  | 60.3  | 6.57 | 40.24  | 12 | 1 |
| -4.1E+18 | IsMasterProtein | cRAP_P00761 | Trypsin OS=Sus scrofa PE=1 SV=1                                                                                         | 45 | 9  | 81 | 9  | 231  | 24.4  | 7.18 | 274.85 | 9  | 1 |
| -2.5E+18 | IsMasterProtein | A0A8C4Z8Q6  | 60 kDa heat shock protein, mitochondrial OS=Gadus morhua OX=8049 PE=3 SV=1                                              | 16 | 9  | 10 | 9  | 590  | 62.4  | 5.62 | 30.42  | 9  | 1 |
| -3.5E+17 | IsMasterProtein | A0A8C4ZKE4  | Tropomyosin alpha-3 chain-like OS=Gadus morhua OX=8049 GN=LOC115554335 PE=3 SV=1                                        | 40 | 10 | 12 | 9  | 248  | 28.8  | 4.83 | 37.57  | 10 | 1 |
| -2.6E+17 | IsMasterProtein | A0A8C5B707  | Stress-70 protein, mitochondrial OS=Gadus morhua OX=8049 GN=hspa9 PE=3 SV=1                                             | 19 | 9  | 10 | 9  | 664  | 72.5  | 6.32 | 30.14  | 9  | 1 |
| 1.69E+18 | IsMasterProtein | A0A8C4ZJD9  | Peroxisomal protein OS=Gadus morhua OX=8049 GN=prdx5 PE=3 SV=1                                                          | 59 | 9  | 11 | 9  | 190  | 20    | 8.34 | 34.95  | 9  | 1 |
| 2.6E+18  | IsMasterProtein | A0A8C5FIW7  | Cytoskeleton associated protein 4 OS=Gadus morhua OX=8049 PE=4 SV=1                                                     | 27 | 9  | 9  | 9  | 434  | 44.9  | 4.7  | 29.5   | 9  | 1 |
| 2.96E+18 | IsMasterProtein | A0A8C5CSQ7  | Fetuin B OS=Gadus morhua OX=8049 GN=fetub PE=4 SV=1                                                                     | 30 | 9  | 25 | 9  | 488  | 53.1  | 6.61 | 84.21  | 9  | 1 |
| 3.66E+18 | IsMasterProtein | A0A8C4Z0G7  | T-complex protein 1 subunit gamma OS=Gadus morhua OX=8049 GN=cct3 PE=3 SV=1                                             | 18 | 9  | 9  | 9  | 539  | 59.5  | 6.33 | 24.3   | 9  | 1 |
| 5.56E+18 | IsMasterProtein | A0A8C5F686  | Calreticulin OS=Gadus morhua OX=8049 PE=3 SV=1                                                                          | 30 | 10 | 14 | 9  | 426  | 49    | 4.45 | 41.46  | 10 | 1 |
| 5.92E+18 | IsMasterProtein | A0A8C4ZKZ3  | Uncharacterized protein OS=Gadus morhua OX=8049 PE=3 SV=1                                                               | 47 | 29 | 38 | 9  | 636  | 70    | 5.36 | 109.92 | 29 | 1 |
| 7.25E+18 | IsMasterProtein | A0A8C5FVF2  | Myosin-9-like OS=Gadus morhua OX=8049 GN=LOC115540203 PE=3 SV=1                                                         | 9  | 11 | 14 | 9  | 1917 | 222.1 | 5.49 | 39.97  | 11 | 1 |
| 7.26E+18 | IsMasterProtein | A0A8C5C226  | Keratin, type I cytoskeletal 13-like OS=Gadus morhua OX=8049 GN=LOC115534825 PE=4 SV=1                                  | 40 | 16 | 24 | 9  | 455  | 47.5  | 4.91 | 70.71  | 16 | 1 |
| 7.42E+18 | IsMasterProtein | A0A8C5FNK1  | Apolipoprotein A-Ia OS=Gadus morhua OX=8049 GN=apoa1a PE=3 SV=1                                                         | 42 | 9  | 12 | 9  | 247  | 27.8  | 5.06 | 31.91  | 9  | 1 |
| -9.1E+18 | IsMasterProtein | A0A8C5ASU7  | MICOS complex subunit MIC60 OS=Gadus morhua OX=8049 GN=immt PE=3 SV=1                                                   | 14 | 8  | 9  | 8  | 730  | 80.8  | 5.2  | 25.15  | 8  | 1 |
| -9.1E+18 | IsMasterProtein | A0A8C4ZFI6  | Bifunctional 3'-phosphoadenosine 5'-phosphosulfate synthase 2-like OS=Gadus morhua OX=8049 GN=LOC115559783 PE=3 SV=1    | 17 | 8  | 8  | 8  | 610  | 68.4  | 6.87 | 23.55  | 8  | 1 |
| -9.1E+18 | IsMasterProtein | A0A8C4ZP64  | Vitellogenin-2-like OS=Gadus morhua OX=8049 GN=LOC115555766 PE=4 SV=1                                                   | 13 | 19 | 24 | 8  | 1624 | 177.1 | 9.06 | 68.37  | 19 | 1 |
| -8E+18   | IsMasterProtein | A0A8C4ZEH5  | Transketolase b OS=Gadus morhua OX=8049 PE=4 SV=1                                                                       | 19 | 8  | 10 | 8  | 625  | 68    | 6.96 | 34.54  | 8  | 1 |
| -8E+18   | IsMasterProtein | A0A8C5A9I9  | Uncharacterized protein OS=Gadus morhua OX=8049 PE=4 SV=1                                                               | 37 | 18 | 24 | 8  | 547  | 60.9  | 5.41 | 68.45  | 18 | 1 |
| -7.5E+18 | IsMasterProtein | A0A8C4ZPM4  | Collagenase 3 OS=Gadus morhua OX=8049 GN=mmp30 PE=3 SV=1                                                                | 17 | 8  | 8  | 8  | 500  | 56.2  | 7.24 | 21.64  | 8  | 1 |
| -7.3E+18 | IsMasterProtein | A0A8C4ZX28  | Protein disulfide-isomerase A6 OS=Gadus morhua OX=8049 GN=pdia6 PE=3 SV=1                                               | 24 | 8  | 9  | 8  | 440  | 47.5  | 5.27 | 26.38  | 8  | 1 |
| -7.2E+18 | IsMasterProtein | A0A8C5FXT0  | HECT-type E3 ubiquitin transferase OS=Gadus morhua OX=8049 GN=HUWE1 PE=4 SV=1                                           | 4  | 8  | 8  | 8  | 4195 | 461.6 | 5.39 | 26.46  | 8  | 1 |

|          |                 |            |                                                                                                                  |    |    |    |   |      |       |       |        |    |   |
|----------|-----------------|------------|------------------------------------------------------------------------------------------------------------------|----|----|----|---|------|-------|-------|--------|----|---|
| -7.1E+18 | IsMasterProtein | A0A8C5F3L3 | Uncharacterized protein OS=Gadus morhua OX=8049 PE=3 SV=1                                                        | 38 | 8  | 9  | 8 | 307  | 33.9  | 7.74  | 27.38  | 8  | 1 |
| -7E+18   | IsMasterProtein | A0A8C5AJ03 | RNA helicase OS=Gadus morhua OX=8049 GN=evplb PE=3 SV=1                                                          | 15 | 8  | 8  | 8 | 676  | 75    | 9.29  | 23.14  | 8  | 1 |
| -7E+18   | IsMasterProtein | A0A8C4YVQ7 | Vacuolar proton pump subunit B OS=Gadus morhua OX=8049 GN=atp6v1ba PE=3 SV=1                                     | 26 | 8  | 8  | 8 | 492  | 54.7  | 5.31  | 23.19  | 8  | 1 |
| -6.7E+18 | IsMasterProtein | A0A8C5A144 | Fructose-bisphosphate aldolase OS=Gadus morhua OX=8049 PE=3 SV=1                                                 | 34 | 11 | 14 | 8 | 353  | 38.5  | 7.87  | 44.99  | 11 | 1 |
| -6.1E+18 | IsMasterProtein | A0A8C4ZBT5 | Serotransferrin OS=Gadus morhua OX=8049 GN=LOC115548408 PE=3 SV=1                                                | 63 | 44 | 99 | 8 | 689  | 73.3  | 7.31  | 341.34 | 44 | 1 |
| -5.8E+18 | IsMasterProtein | A0A8C5C4N4 | Acetyl-CoA acetyltransferase 1 OS=Gadus morhua OX=8049 GN=acat1 PE=3 SV=1                                        | 34 | 8  | 8  | 8 | 410  | 42.9  | 8.62  | 20.48  | 8  | 1 |
| -5.4E+18 | IsMasterProtein | A0A8C4YVK4 | Secreted phosphoprotein 24 OS=Gadus morhua OX=8049 PE=3 SV=1                                                     | 49 | 8  | 22 | 8 | 140  | 15.4  | 8.48  | 74.25  | 8  | 1 |
| -5.3E+18 | IsMasterProtein | A0A8C5B6G1 | Dachsous cadherin-related 1b OS=Gadus morhua OX=8049 PE=4 SV=1                                                   | 4  | 8  | 8  | 8 | 3114 | 334.9 | 4.91  | 21.32  | 8  | 1 |
| -5E+18   | IsMasterProtein | A0A8C4ZJ04 | SCO-spondin OS=Gadus morhua OX=8049 PE=3 SV=1                                                                    | 3  | 8  | 8  | 8 | 5002 | 534.9 | 5.72  | 25.52  | 8  | 1 |
| -4.4E+18 | IsMasterProtein | A0A8C5FF90 | Clathrin heavy chain OS=Gadus morhua OX=8049 PE=3 SV=1                                                           | 29 | 35 | 46 | 8 | 1675 | 191.1 | 5.52  | 145.91 | 35 | 1 |
| -3.6E+18 | IsMasterProtein | A0A8C5AQP5 | Uncharacterized protein OS=Gadus morhua OX=8049 PE=4 SV=1                                                        | 18 | 8  | 9  | 8 | 617  | 67.9  | 6.99  | 28.3   | 8  | 1 |
| -3.5E+18 | IsMasterProtein | A8CZC9     | Elongation factor 1-alpha OS=Gadus morhua OX=8049 PE=2 SV=1                                                      | 28 | 12 | 17 | 8 | 461  | 50.1  | 9.14  | 53.41  | 12 | 1 |
| -3E+18   | IsMasterProtein | A0A8C5FR30 | Golgin A4 OS=Gadus morhua OX=8049 GN=golga4 PE=4 SV=1                                                            | 6  | 8  | 8  | 8 | 2111 | 242.3 | 5.33  | 20.49  | 8  | 1 |
| -1.8E+18 | IsMasterProtein | A0A8C5CMJ8 | Vinculin OS=Gadus morhua OX=8049 GN=VCL PE=3 SV=1                                                                | 11 | 8  | 9  | 8 | 1096 | 119.8 | 6.2   | 25.62  | 8  | 1 |
| -1.2E+18 | IsMasterProtein | A0A8C4ZNP4 | Serine protease inhibitor 2.1-like OS=Gadus morhua OX=8049 GN=LOC115553729 PE=3 SV=1                             | 25 | 8  | 9  | 8 | 418  | 46.5  | 5.74  | 27.66  | 8  | 1 |
| -7.9E+17 | IsMasterProtein | A0A8C5A5M0 | Deoxyribonuclease II OS=Gadus morhua OX=8049 GN=dnase2 PE=3 SV=1                                                 | 26 | 8  | 9  | 8 | 406  | 44.1  | 8.24  | 24.06  | 8  | 1 |
| -5.6E+17 | IsMasterProtein | A0A8C5ATU8 | Vascular cell adhesion protein 1-like OS=Gadus morhua OX=8049 GN=LOC115529122 PE=4 SV=1                          | 10 | 8  | 9  | 8 | 875  | 96.4  | 6.89  | 24.58  | 8  | 1 |
| -2.6E+17 | IsMasterProtein | A0A8C4ZLQ2 | Chitinase, di-N-acetyl- OS=Gadus morhua OX=8049 GN=ctbs PE=3 SV=1                                                | 31 | 8  | 8  | 8 | 366  | 41.2  | 5.26  | 21.31  | 8  | 1 |
| -2E+17   | IsMasterProtein | A0A8C5FBL8 | Uncharacterized protein OS=Gadus morhua OX=8049 PE=4 SV=1                                                        | 28 | 10 | 29 | 8 | 512  | 54.7  | 6.67  | 99.36  | 10 | 1 |
| 6.29E+17 | IsMasterProtein | A0A8C4ZNJ6 | Ribosomal protein, large, P0 OS=Gadus morhua OX=8049 GN=rplp0 PE=3 SV=1                                          | 36 | 8  | 9  | 8 | 256  | 28.2  | 9.16  | 27.32  | 8  | 1 |
| 8.76E+17 | IsMasterProtein | A0A8C5BX15 | Cadherin-2-like OS=Gadus morhua OX=8049 GN=CDH2 PE=4 SV=1                                                        | 9  | 8  | 9  | 8 | 1154 | 127.3 | 5.11  | 27.93  | 8  | 1 |
| 1.08E+18 | IsMasterProtein | A0A8C5FEX0 | EGF containing fibulin extracellular matrix protein 2a OS=Gadus morhua OX=8049 GN=efemp2a PE=4 SV=1              | 25 | 8  | 8  | 8 | 436  | 48.7  | 4.86  | 24.07  | 8  | 1 |
| 1.18E+18 | IsMasterProtein | A0A8C5BDK0 | Early endosome antigen 1 OS=Gadus morhua OX=8049 GN=eea1 PE=4 SV=1                                               | 8  | 8  | 9  | 8 | 1361 | 153   | 5.96  | 26.48  | 8  | 1 |
| 1.78E+18 | IsMasterProtein | A0A8C5BAZ5 | Solute carrier family 12 member 2 OS=Gadus morhua OX=8049 PE=3 SV=1                                              | 11 | 9  | 11 | 8 | 1163 | 126.9 | 6.19  | 33.72  | 9  | 1 |
| 3.96E+18 | IsMasterProtein | A0A8C4Z6C0 | Vitronectin b OS=Gadus morhua OX=8049 GN=vtnb PE=4 SV=1                                                          | 21 | 8  | 12 | 8 | 455  | 50.8  | 7.75  | 33.42  | 8  | 1 |
| 4.04E+18 | IsMasterProtein | A0A8C5D2A7 | L-lactate dehydrogenase OS=Gadus morhua OX=8049 GN=LOC115541542 PE=3 SV=1                                        | 23 | 9  | 12 | 8 | 451  | 49.2  | 9.17  | 34.16  | 9  | 1 |
| 4.46E+18 | IsMasterProtein | A0A8C5C7T6 | Prosaposin OS=Gadus morhua OX=8049 GN=psap PE=4 SV=1                                                             | 21 | 8  | 10 | 8 | 531  | 58.2  | 4.89  | 27.82  | 8  | 1 |
| 5.06E+18 | IsMasterProtein | A0A8C5B065 | HERV-H LTR-associating 1 OS=Gadus morhua OX=8049 GN=HHLA1 PE=4 SV=1                                              | 13 | 8  | 10 | 8 | 558  | 59.4  | 8.37  | 30.2   | 8  | 1 |
| 6.04E+18 | IsMasterProtein | A0A8C5BZV6 | HECT-type E3 ubiquitin transferase OS=Gadus morhua OX=8049 PE=4 SV=1                                             | 3  | 8  | 8  | 8 | 4679 | 510.4 | 6.7   | 22.36  | 8  | 1 |
| 6.38E+18 | IsMasterProtein | A0A8C4Z702 | Peroxioredoxin-1 OS=Gadus morhua OX=8049 GN=prdx2 PE=3 SV=1                                                      | 46 | 8  | 24 | 8 | 197  | 21.7  | 6.34  | 88.52  | 8  | 1 |
| -9E+18   | IsMasterProtein | A0A8C5FN23 | Glutamine--tRNA ligase OS=Gadus morhua OX=8049 GN=qars1 PE=3 SV=1                                                | 12 | 7  | 8  | 7 | 750  | 85.6  | 8.16  | 21.72  | 7  | 1 |
| -8.8E+18 | IsMasterProtein | A0A8C5C7Q2 | Dystonin OS=Gadus morhua OX=8049 GN=DST PE=4 SV=1                                                                | 2  | 8  | 11 | 7 | 6361 | 715.1 | 5.49  | 28.23  | 8  | 1 |
| -8.8E+18 | IsMasterProtein | A0A8C5AID1 | Aminopeptidase OS=Gadus morhua OX=8049 GN=anpepb PE=3 SV=1                                                       | 10 | 7  | 8  | 7 | 966  | 108.1 | 5.73  | 23.56  | 7  | 1 |
| -8.7E+18 | IsMasterProtein | A0A8C5FKJ8 | Heat shock protein 90, alpha (cytosolic), class A member 1, tandem duplicate 2 OS=Gadus morhua OX=8049 PE=3 SV=1 | 22 | 14 | 18 | 7 | 744  | 85.5  | 5.8   | 55.52  | 14 | 1 |
| -8.7E+18 | IsMasterProtein | A0A8C5F477 | Rab GDP dissociation inhibitor OS=Gadus morhua OX=8049 GN=GDI2 PE=3 SV=1                                         | 26 | 7  | 9  | 7 | 439  | 49.6  | 5.71  | 26.73  | 7  | 1 |
| -8.6E+18 | IsMasterProtein | A0A8C4ZQG1 | Apolipoprotein Ba OS=Gadus morhua OX=8049 GN=apoba PE=4 SV=1                                                     | 2  | 7  | 7  | 7 | 4366 | 489.1 | 6.32  | 16.9   | 7  | 1 |
| -8.5E+18 | IsMasterProtein | A0A8C5A766 | Plectin a OS=Gadus morhua OX=8049 GN=pleca PE=4 SV=1                                                             | 2  | 7  | 17 | 7 | 4695 | 533   | 6.77  | 36.88  | 7  | 1 |
| -8.5E+18 | IsMasterProtein | A0A8C4YUX8 | Pyruvate dehydrogenase E1 component subunit beta OS=Gadus morhua OX=8049 GN=pdhb PE=4 SV=1                       | 36 | 7  | 13 | 7 | 359  | 39.1  | 5.91  | 42.67  | 7  | 1 |
| -8.4E+18 | IsMasterProtein | A0A8C4ZGV9 | Calreticulin OS=Gadus morhua OX=8049 PE=3 SV=1                                                                   | 27 | 8  | 8  | 7 | 424  | 48.9  | 4.48  | 26.29  | 8  | 1 |
| -8.3E+18 | IsMasterProtein | A0A8C4ZKH5 | Anterior gradient 2 OS=Gadus morhua OX=8049 GN=agr2 PE=4 SV=1                                                    | 40 | 7  | 12 | 7 | 170  | 19.7  | 8.9   | 31.32  | 7  | 1 |
| -8.1E+18 | IsMasterProtein | A0A8C5B042 | Histone H4 OS=Gadus morhua OX=8049 PE=3 SV=1                                                                     | 49 | 7  | 9  | 7 | 96   | 10.9  | 11.18 | 27.49  | 7  | 1 |



|          |                 |            |                                                                                                                          |    |    |    |   |      |       |       |       |    |   |
|----------|-----------------|------------|--------------------------------------------------------------------------------------------------------------------------|----|----|----|---|------|-------|-------|-------|----|---|
| -7.9E+18 | IsMasterProtein | A0A8C5FBY3 | Aconitate hydratase, mitochondrial OS=Gadus morhua OX=8049 PE=3 SV=1                                                     | 21 | 12 | 13 | 7 | 783  | 84.8  | 6.43  | 37.87 | 12 | 1 |
| -7.8E+18 | IsMasterProtein | A0A8C5C0Q4 | Lamin B2 OS=Gadus morhua OX=8049 PE=3 SV=1                                                                               | 10 | 7  | 8  | 7 | 727  | 82    | 8.31  | 19.9  | 7  | 1 |
| -7.6E+18 | IsMasterProtein | A0A8C5B3F4 | Kinesin family member 1Aa OS=Gadus morhua OX=8049 PE=3 SV=1                                                              | 7  | 9  | 9  | 7 | 1689 | 189.9 | 6.14  | 22.06 | 9  | 1 |
| -7.3E+18 | IsMasterProtein | A0A8C5A6A5 | Complement component C9 OS=Gadus morhua OX=8049 GN=LOC115531106 PE=3 SV=1                                                | 16 | 7  | 7  | 7 | 583  | 64.1  | 7.25  | 19.92 | 7  | 1 |
| -7.2E+18 | IsMasterProtein | A0A8C5CFK4 | Spectrin beta chain OS=Gadus morhua OX=8049 GN=LOC115559640 PE=3 SV=1                                                    | 7  | 14 | 15 | 7 | 2342 | 268.1 | 5.92  | 42.52 | 14 | 1 |
| -6.8E+18 | IsMasterProtein | A0A8C5AUM7 | ATP-binding cassette, sub-family B (MDR/TAP), member 7 OS=Gadus morhua OX=8049 GN=ABCB7 PE=4 SV=1                        | 37 | 7  | 7  | 7 | 224  | 24    | 7.91  | 21.14 | 7  | 1 |
| -6.8E+18 | IsMasterProtein | A0A8C5FD21 | Ribosomal protein L4 OS=Gadus morhua OX=8049 GN=rpL4 PE=3 SV=1                                                           | 21 | 7  | 7  | 7 | 374  | 42    | 11.27 | 17.99 | 7  | 1 |
| -6.4E+18 | IsMasterProtein | A0A8C5FH89 | Glucose-6-phosphate isomerase OS=Gadus morhua OX=8049 PE=3 SV=1                                                          | 17 | 7  | 7  | 7 | 563  | 62.8  | 6.67  | 22.82 | 7  | 1 |
| -6.3E+18 | IsMasterProtein | A0A8C5BVU8 | Myosin VAa OS=Gadus morhua OX=8049 GN=myo5aa PE=3 SV=1                                                                   | 7  | 7  | 7  | 7 | 1851 | 213.3 | 8.75  | 17.59 | 7  | 1 |
| -6.3E+18 | IsMasterProtein | A0A8C4Z9P1 | Pentaxin OS=Gadus morhua OX=8049 GN=LOC115554653 PE=3 SV=1                                                               | 40 | 7  | 11 | 7 | 225  | 25.4  | 5.66  | 24.37 | 7  | 1 |
| -6.2E+18 | IsMasterProtein | A0A8C5CKI2 | T-complex protein 1 subunit theta OS=Gadus morhua OX=8049 GN=cct8 PE=3 SV=1                                              | 16 | 7  | 7  | 7 | 494  | 53.9  | 6     | 19.6  | 7  | 1 |
| -6.2E+18 | IsMasterProtein | A0A8C5BRQ2 | Annexin OS=Gadus morhua OX=8049 PE=3 SV=1                                                                                | 32 | 7  | 8  | 7 | 319  | 34.9  | 4.51  | 25.9  | 7  | 1 |
| -6.1E+18 | IsMasterProtein | A0A8C5BL35 | Thymidine phosphorylase OS=Gadus morhua OX=8049 GN=LOC115542463 PE=3 SV=1                                                | 25 | 7  | 7  | 7 | 448  | 47.1  | 6.15  | 20.9  | 7  | 1 |
| -5.7E+18 | IsMasterProtein | P83856     | Kininogen (Fragment) OS=Gadus morhua OX=8049 PE=1 SV=1                                                                   | 73 | 7  | 13 | 7 | 123  | 13.4  | 5.07  | 46.83 | 7  | 1 |
| -5.4E+18 | IsMasterProtein | A0A8C5D7F3 | Protein-tyrosine-phosphatase OS=Gadus morhua OX=8049 PE=3 SV=1                                                           | 8  | 7  | 9  | 7 | 1941 | 215.9 | 6.38  | 29.01 | 7  | 1 |
| -5.5E+18 | IsMasterProtein | A0A8C5ABQ8 | RNA polymerase II subunit G OS=Gadus morhua OX=8049 GN=polr2g PE=4 SV=1                                                  | 17 | 7  | 7  | 7 | 528  | 59.8  | 8.06  | 20.81 | 7  | 1 |
| -5.5E+18 | IsMasterProtein | A0A8C5A0N8 | Legumain OS=Gadus morhua OX=8049 PE=3 SV=1                                                                               | 24 | 7  | 8  | 7 | 431  | 48.3  | 6.24  | 24.09 | 7  | 1 |
| -5.3E+18 | IsMasterProtein | A0A8C5CDL5 | Complement factor B-like OS=Gadus morhua OX=8049 GN=LOC115546677 PE=4 SV=1                                               | 15 | 7  | 8  | 7 | 722  | 81.6  | 5.78  | 23.13 | 7  | 1 |
| -5.1E+18 | IsMasterProtein | A0A8C5CYD3 | Bromodomain adjacent to zinc finger domain, 1B OS=Gadus morhua OX=8049 GN=baz1b PE=4 SV=1                                | 7  | 7  | 8  | 7 | 1551 | 177.7 | 6.29  | 20.48 | 7  | 1 |
| -4.6E+18 | IsMasterProtein | A0A8C5BQ64 | Inactive carboxypeptidase-like protein X2 OS=Gadus morhua OX=8049 GN=si:ch1073-459j12.1 PE=3 SV=1                        | 6  | 7  | 7  | 7 | 1257 | 141.5 | 4.96  | 18.36 | 7  | 1 |
| -3.2E+18 | IsMasterProtein | A0A8C5F488 | Adhesion G protein-coupled receptor G6 OS=Gadus morhua OX=8049 PE=3 SV=1                                                 | 5  | 7  | 8  | 7 | 1165 | 127.9 | 7.46  | 21.22 | 7  | 1 |
| -2.9E+18 | IsMasterProtein | A0A8C4YW06 | 40S ribosomal protein S3a OS=Gadus morhua OX=8049 GN=tps3a PE=3 SV=1                                                     | 27 | 7  | 8  | 7 | 266  | 30.1  | 9.73  | 22.32 | 7  | 1 |
| -2.6E+18 | IsMasterProtein | Q56TU0     | Type-4 ice-structuring protein OS=Gadus morhua OX=8049 PE=2 SV=1                                                         | 69 | 7  | 17 | 7 | 125  | 14    | 4.7   | 54.21 | 7  | 1 |
| -1.7E+18 | IsMasterProtein | A0A8C5C7W7 | Cytochrome b-c1 complex subunit 2, mitochondrial OS=Gadus morhua OX=8049 GN=LOC115530818 PE=4 SV=1                       | 21 | 7  | 9  | 7 | 444  | 46.9  | 7.84  | 30.95 | 7  | 1 |
| -1.6E+18 | IsMasterProtein | A0A8C4ZAC5 | Complement component 6 OS=Gadus morhua OX=8049 GN=c6 PE=3 SV=1                                                           | 9  | 7  | 7  | 7 | 930  | 104.9 | 7.52  | 18.31 | 7  | 1 |
| -9.2E+17 | IsMasterProtein | A0A8C5AX27 | Dolichyl-diphosphooligosaccharide--protein glycosyltransferase 48 kDa subunit OS=Gadus morhua OX=8049 GN=ddost PE=3 SV=1 | 29 | 7  | 7  | 7 | 436  | 48.1  | 5.31  | 19.39 | 7  | 1 |
| -2.4E+17 | IsMasterProtein | A0A8C5BRM0 | Glyceraldehyde-3-phosphate dehydrogenase OS=Gadus morhua OX=8049 GN=gapdhs PE=3 SV=1                                     | 23 | 7  | 10 | 7 | 335  | 36    | 6.1   | 27.66 | 7  | 1 |
| -7.2E+16 | IsMasterProtein | A0A8C5CW40 | Coatomer subunit gamma OS=Gadus morhua OX=8049 PE=3 SV=1                                                                 | 11 | 7  | 7  | 7 | 847  | 94.6  | 5.53  | 19.44 | 7  | 1 |
| 3.37E+17 | IsMasterProtein | A0A8C5CVK9 | Aldolase_II domain-containing protein OS=Gadus morhua OX=8049 PE=3 SV=1                                                  | 6  | 7  | 8  | 7 | 1439 | 161.5 | 6.02  | 20.93 | 7  | 1 |
| 3.54E+17 | IsMasterProtein | A0A8C5FKW8 | Uncharacterized protein OS=Gadus morhua OX=8049 PE=4 SV=1                                                                | 23 | 7  | 7  | 7 | 371  | 42.4  | 7.9   | 22.74 | 7  | 1 |
| 6.57E+17 | IsMasterProtein | A0A8C5CXW3 | Teneurin transmembrane protein 4 OS=Gadus morhua OX=8049 PE=3 SV=1                                                       | 6  | 7  | 7  | 7 | 2429 | 269.5 | 7.12  | 20.72 | 7  | 1 |
| 1.27E+18 | IsMasterProtein | A0A8C5B7J2 | Multiple inositol polyphosphate phosphatase 1 OS=Gadus morhua OX=8049 GN=LOC115559836 PE=3 SV=1                          | 18 | 7  | 9  | 7 | 464  | 52.7  | 8.07  | 24.78 | 7  | 1 |
| 1.46E+18 | IsMasterProtein | A0A8C5ALM2 | IF rod domain-containing protein OS=Gadus morhua OX=8049 PE=4 SV=1                                                       | 34 | 13 | 16 | 7 | 449  | 48.2  | 5.25  | 45.59 | 13 | 1 |
| 2.4E+18  | IsMasterProtein | A0A8C4ZSJ7 | Ribosomal protein S4 X-linked OS=Gadus morhua OX=8049 PE=3 SV=1                                                          | 26 | 7  | 7  | 7 | 307  | 34.4  | 10.02 | 17.92 | 7  | 1 |
| 2.48E+18 | IsMasterProtein | A0A8C5A7M9 | Apolipoprotein A-II OS=Gadus morhua OX=8049 GN=apoa2 PE=4 SV=1                                                           | 66 | 7  | 24 | 7 | 141  | 15.4  | 6.65  | 89.25 | 7  | 1 |
| 2.49E+18 | IsMasterProtein | A0A8C5F3W4 | ST13 Hsp70 interacting protein OS=Gadus morhua OX=8049 GN=st13 PE=3 SV=1                                                 | 16 | 7  | 7  | 7 | 398  | 42.2  | 5.21  | 18    | 7  | 1 |

|          |                 |            |                                                                                                                         |    |   |    |   |      |       |      |       |   |   |
|----------|-----------------|------------|-------------------------------------------------------------------------------------------------------------------------|----|---|----|---|------|-------|------|-------|---|---|
| 4.4E+18  | IsMasterProtein | A0A8C4YTR2 | UDP-glucose glycoprotein glucosyltransferase 1 OS=Gadus morhua OX=8049 PE=3 SV=1                                        | 7  | 7 | 10 | 7 | 1516 | 171.2 | 5.94 | 25.82 | 7 | 1 |
| 8.1E+18  | IsMasterProtein | A0A8C5B153 | Dihydrolipoamide acetyltransferase component of pyruvate dehydrogenase complex OS=Gadus morhua OX=8049 GN=dbt PE=3 SV=1 | 31 | 7 | 8  | 7 | 487  | 53.5  | 8.22 | 26.29 | 7 | 1 |
| 8.32E+18 | IsMasterProtein | A0A8C5BK27 | Ryanodine receptor 1b (skeletal) OS=Gadus morhua OX=8049 PE=4 SV=1                                                      | 3  | 7 | 7  | 7 | 5006 | 566.2 | 5.19 | 19.06 | 7 | 1 |
| 9E+18    | IsMasterProtein | A0A8C5BLF8 | F5/8 type C domain-containing protein OS=Gadus morhua OX=8049 PE=3 SV=1                                                 | 11 | 7 | 7  | 7 | 796  | 90.5  | 7.88 | 18.64 | 7 | 1 |
| -9.2E+18 | IsMasterProtein | A0A8C5BEV6 | Elastin microfibril interfacer 1b OS=Gadus morhua OX=8049 GN=emilin1b PE=4 SV=1                                         | 7  | 6 | 6  | 6 | 1212 | 126.5 | 6.65 | 14.84 | 6 | 1 |
| -9E+18   | IsMasterProtein | A0A8C5AUR5 | HELP domain-containing protein OS=Gadus morhua OX=8049 PE=4 SV=1                                                        | 10 | 6 | 6  | 6 | 779  | 85.5  | 6.62 | 14.41 | 6 | 1 |
| -9E+18   | IsMasterProtein | A0A8C5CS68 | Glutathione transferase OS=Gadus morhua OX=8049 GN=LOC115559880 PE=3 SV=1                                               | 21 | 6 | 8  | 6 | 226  | 25.7  | 6.93 | 19.98 | 6 | 1 |
| -8.9E+18 | IsMasterProtein | A0A8C5CRJ4 | Isocitrate dehydrogenase [NAD] subunit, mitochondrial OS=Gadus morhua OX=8049 GN=LOC115558864 PE=3 SV=1                 | 22 | 9 | 9  | 6 | 366  | 39.9  | 6.86 | 25.75 | 9 | 1 |
| -8.8E+18 | IsMasterProtein | A0A8C5FRQ7 | Glyceraldehyde-3-phosphate dehydrogenase OS=Gadus morhua OX=8049 PE=3 SV=1                                              | 29 | 7 | 10 | 6 | 340  | 36.7  | 8.56 | 36.78 | 7 | 1 |
| -8.7E+18 | IsMasterProtein | A0A8C5A3A6 | Uncharacterized protein OS=Gadus morhua OX=8049 PE=3 SV=1                                                               | 19 | 6 | 6  | 6 | 393  | 43.4  | 5.11 | 17.53 | 6 | 1 |
| -8.5E+18 | IsMasterProtein | A0A8C5C047 | Collagen, type I, alpha 1b OS=Gadus morhua OX=8049 GN=col1a1b PE=4 SV=1                                                 | 7  | 6 | 7  | 6 | 1399 | 132.2 | 6.02 | 18.14 | 6 | 1 |
| -8.2E+18 | IsMasterProtein | A0A8C4ZSV3 | Creatine kinase OS=Gadus morhua OX=8049 GN=LOC115551044 PE=3 SV=1                                                       | 24 | 7 | 8  | 6 | 453  | 50.7  | 8.47 | 28.13 | 7 | 1 |
| -8E+18   | IsMasterProtein | A0A8C5AAW2 | PACT_coil_coil domain-containing protein OS=Gadus morhua OX=8049 PE=4 SV=1                                              | 3  | 6 | 7  | 6 | 2863 | 321.1 | 5.06 | 17.7  | 6 | 1 |
| -8E+18   | IsMasterProtein | A0A8C5C6U5 | Syndecan binding protein (syntenin) 2 OS=Gadus morhua OX=8049 GN=sdcbp2 PE=4 SV=1                                       | 25 | 6 | 10 | 6 | 301  | 32.6  | 7.87 | 37.29 | 6 | 1 |
| -7.9E+18 | IsMasterProtein | A0A8C4ZW18 | Uncharacterized protein OS=Gadus morhua OX=8049 PE=3 SV=1                                                               | 10 | 6 | 9  | 6 | 1035 | 111.6 | 4.83 | 28.28 | 6 | 1 |
| -7.5E+18 | IsMasterProtein | A0A8C5F8Y0 | ATP synthase subunit O, mitochondrial OS=Gadus morhua OX=8049 PE=3 SV=1                                                 | 33 | 6 | 7  | 6 | 185  | 20    | 9.57 | 17.76 | 6 | 1 |
| -7.4E+18 | IsMasterProtein | A0A8C5BLE6 | Zinc finger protein 609-like OS=Gadus morhua OX=8049 GN=LOC115558355 PE=4 SV=1                                          | 9  | 6 | 6  | 6 | 1472 | 160.9 | 8.12 | 15.06 | 6 | 1 |
| -7.4E+18 | IsMasterProtein | A0A8C5FVM7 | DNA topoisomerase OS=Gadus morhua OX=8049 PE=3 SV=1                                                                     | 11 | 6 | 6  | 6 | 1022 | 111.6 | 8.65 | 16.71 | 6 | 1 |
| -7.3E+18 | IsMasterProtein | A0A8C5FET6 | 26S proteasome regulatory subunit 7 OS=Gadus morhua OX=8049 GN=PSMC2 PE=3 SV=1                                          | 21 | 6 | 9  | 6 | 459  | 51.3  | 6.61 | 27.3  | 6 | 1 |
| -7.1E+18 | IsMasterProtein | A0A8C5AZE0 | Calnexin OS=Gadus morhua OX=8049 PE=3 SV=1                                                                              | 15 | 6 | 7  | 6 | 579  | 64.9  | 4.7  | 21.17 | 6 | 1 |
| -6.9E+18 | IsMasterProtein | A0A8C4ZQW9 | High mobility group box 2a OS=Gadus morhua OX=8049 GN=hmg2a PE=4 SV=1                                                   | 27 | 7 | 8  | 6 | 213  | 24    | 8.4  | 18.83 | 7 | 1 |
| -6.8E+18 | IsMasterProtein | A0A8C4ZK56 | Arrestin domain containing 1a OS=Gadus morhua OX=8049 GN=arrdc1a PE=3 SV=1                                              | 18 | 6 | 7  | 6 | 441  | 47.8  | 8.4  | 18.36 | 6 | 1 |
| -6.7E+18 | IsMasterProtein | A0A8C5F4N2 | Phosphopyruvate hydratase OS=Gadus morhua OX=8049 GN=eno1a PE=3 SV=1                                                    | 30 | 9 | 16 | 6 | 432  | 46.9  | 5.95 | 50.25 | 9 | 1 |
| -6.7E+18 | IsMasterProtein | A0A8C4Z9R4 | Creatine kinase OS=Gadus morhua OX=8049 GN=CKM PE=3 SV=1                                                                | 18 | 7 | 8  | 6 | 380  | 42.7  | 6.93 | 22.62 | 7 | 1 |
| -5.8E+18 | IsMasterProtein | A0A8C5BJU1 | Phosphorylase b kinase regulatory subunit OS=Gadus morhua OX=8049 GN=PHKA2 PE=3 SV=1                                    | 13 | 6 | 6  | 6 | 1237 | 137.4 | 6.13 | 17.28 | 6 | 1 |
| -5.6E+18 | IsMasterProtein | A0A8C5BF97 | Eukaryotic translation initiation factor 3 subunit C OS=Gadus morhua OX=8049 GN=EIF3C PE=3 SV=1                         | 10 | 6 | 11 | 6 | 847  | 96.9  | 5.58 | 30.88 | 6 | 1 |
| -5.6E+18 | IsMasterProtein | A0A8C5B0Y6 | Pyruvate dehydrogenase E1 component subunit alpha OS=Gadus morhua OX=8049 PE=4 SV=1                                     | 20 | 6 | 7  | 6 | 387  | 42.8  | 7.02 | 19.04 | 6 | 1 |
| -5.3E+18 | IsMasterProtein | A0A8C5FSW9 | Uncharacterized protein OS=Gadus morhua OX=8049 PE=3 SV=1                                                               | 6  | 6 | 6  | 6 | 2034 | 230.4 | 8.84 | 16.35 | 6 | 1 |
| -4.8E+18 | IsMasterProtein | A0A8C5BI75 | NADH-ubiquinone oxidoreductase 75 kDa subunit, mitochondrial OS=Gadus morhua OX=8049 GN=LOC115542279 PE=3 SV=1          | 11 | 6 | 6  | 6 | 746  | 80.5  | 5.49 | 17.59 | 6 | 1 |
| -4.4E+18 | IsMasterProtein | A0A8C5BV46 | Uncharacterized protein OS=Gadus morhua OX=8049 PE=3 SV=1                                                               | 15 | 6 | 9  | 6 | 628  | 70.8  | 9.14 | 27.97 | 6 | 1 |
| -4.4E+18 | IsMasterProtein | A0A8C5FNF2 | C1q domain-containing protein OS=Gadus morhua OX=8049 PE=4 SV=1                                                         | 16 | 6 | 6  | 6 | 476  | 49.5  | 8.88 | 18.89 | 6 | 1 |
| -3.4E+18 | IsMasterProtein | A0A8C5F6L1 | Fructose-bisphosphate aldolase OS=Gadus morhua OX=8049 PE=3 SV=1                                                        | 17 | 8 | 10 | 6 | 367  | 40.1  | 8.13 | 31.09 | 8 | 1 |
| -3.3E+18 | IsMasterProtein | A0A8C4ZT09 | Ankyrin 3a OS=Gadus morhua OX=8049 PE=4 SV=1                                                                            | 5  | 9 | 10 | 6 | 3889 | 425.2 | 6.95 | 25.06 | 9 | 1 |



|          |                 |            |                                                                                                |    |    |    |   |      |       |       |       |    |   |
|----------|-----------------|------------|------------------------------------------------------------------------------------------------|----|----|----|---|------|-------|-------|-------|----|---|
| -3.1E+18 | IsMasterProtein | A0A8C5FQF0 | Tetratricopeptide repeat domain 34 OS=Gadus morhua OX=8049 GN=ttc34 PE=4 SV=1                  | 11 | 6  | 6  | 6 | 1180 | 125.9 | 8.25  | 15.92 | 6  | 1 |
| -2.6E+18 | IsMasterProtein | A0A8C5ARR7 | Ribosomal protein OS=Gadus morhua OX=8049 GN=rpl10a PE=3 SV=1                                  | 33 | 6  | 6  | 6 | 216  | 24.5  | 9.86  | 17.33 | 6  | 1 |
| -2.4E+18 | IsMasterProtein | A0A8C4Z5B5 | DnaJ heat shock protein family (Hsp40) member C13 OS=Gadus morhua OX=8049 GN=dnaJc13 PE=4 SV=1 | 4  | 6  | 7  | 6 | 2297 | 259.1 | 6.77  | 15.33 | 6  | 1 |
| -2.3E+18 | IsMasterProtein | A0A8C5B195 | Sushi-repeat containing protein X-linked OS=Gadus morhua OX=8049 GN=srpx PE=4 SV=1             | 14 | 6  | 6  | 6 | 471  | 53.1  | 8.4   | 16.16 | 6  | 1 |
| -7.9E+17 | IsMasterProtein | A0A8C5B988 | Growth arrest-specific 6 OS=Gadus morhua OX=8049 PE=4 SV=1                                     | 10 | 6  | 6  | 6 | 649  | 72.2  | 6.3   | 15.6  | 6  | 1 |
| -5.1E+17 | IsMasterProtein | A0A8C4ZH16 | Sulfhydryl oxidase OS=Gadus morhua OX=8049 PE=3 SV=1                                           | 10 | 6  | 7  | 6 | 831  | 92.1  | 5.71  | 21.22 | 6  | 1 |
| -2.5E+17 | IsMasterProtein | A0A8C4ZKD5 | Retinol binding protein 4, plasma OS=Gadus morhua OX=8049 GN=rbp4 PE=3 SV=1                    | 27 | 6  | 8  | 6 | 195  | 22.5  | 6.1   | 20.66 | 6  | 1 |
| -1.1E+17 | IsMasterProtein | A0A8C5CS77 | H15 domain-containing protein OS=Gadus morhua OX=8049 PE=3 SV=1                                | 21 | 6  | 9  | 6 | 225  | 23    | 11.06 | 26.7  | 6  | 1 |
| -1E+17   | IsMasterProtein | A0A8C5A5F7 | T-complex protein 1 subunit beta OS=Gadus morhua OX=8049 GN=cct2 PE=3 SV=1                     | 17 | 6  | 7  | 6 | 535  | 57.7  | 6.44  | 18.41 | 6  | 1 |
| -9.3E+16 | IsMasterProtein | A0A8C5F6E6 | 60S ribosomal protein L27 OS=Gadus morhua OX=8049 GN=rpl27 PE=3 SV=1                           | 43 | 6  | 6  | 6 | 136  | 15.8  | 10.56 | 15.18 | 6  | 1 |
| 4.78E+17 | IsMasterProtein | A0A8C5C0J0 | Transmembrane serine protease 9 OS=Gadus morhua OX=8049 PE=4 SV=1                              | 13 | 6  | 6  | 6 | 615  | 67    | 7.2   | 17    | 6  | 1 |
| 9.85E+17 | IsMasterProtein | A0A8C5B7W3 | Laminin, alpha 4 OS=Gadus morhua OX=8049 PE=4 SV=1                                             | 6  | 6  | 6  | 6 | 1732 | 190.4 | 5.67  | 18.2  | 6  | 1 |
| 1.35E+18 | IsMasterProtein | A0A8C4ZCM9 | Cingulin b OS=Gadus morhua OX=8049 PE=4 SV=1                                                   | 9  | 6  | 6  | 6 | 1228 | 136.8 | 5.59  | 14.63 | 6  | 1 |
| 2.19E+18 | IsMasterProtein | A0A8C4ZXA3 | Peptidyl-prolyl cis-trans isomerase OS=Gadus morhua OX=8049 GN=LOC115531931 PE=3 SV=1          | 38 | 6  | 10 | 6 | 164  | 17.6  | 8.16  | 28.52 | 6  | 1 |
| 2.5E+18  | IsMasterProtein | A0A8C5F524 | 40S ribosomal protein S9 OS=Gadus morhua OX=8049 GN=rps9 PE=3 SV=1                             | 31 | 6  | 6  | 6 | 194  | 22.5  | 10.58 | 15.39 | 6  | 1 |
| 2.84E+18 | IsMasterProtein | A0A8C5BD17 | Ubiquitin carboxyl-terminal hydrolase 7 OS=Gadus morhua OX=8049 PE=3 SV=1                      | 7  | 6  | 6  | 6 | 1190 | 138   | 5.82  | 15.64 | 6  | 1 |
| 3.32E+18 | IsMasterProtein | A0A8C5C9L1 | Uncharacterized protein OS=Gadus morhua OX=8049 PE=4 SV=1                                      | 12 | 7  | 7  | 6 | 533  | 59.9  | 8.16  | 19.2  | 7  | 1 |
| 3.68E+18 | IsMasterProtein | A0A8C5BD06 | SERPIN domain-containing protein OS=Gadus morhua OX=8049 PE=3 SV=1                             | 19 | 6  | 7  | 6 | 349  | 38.7  | 8.9   | 20.2  | 6  | 1 |
| 3.81E+18 | IsMasterProtein | A0A8C5B0W2 | Proteasome 26S subunit, ATPase 5 OS=Gadus morhua OX=8049 GN=psmc5 PE=3 SV=1                    | 10 | 6  | 6  | 6 | 887  | 97.9  | 8.65  | 14.71 | 6  | 1 |
| 3.94E+18 | IsMasterProtein | A0A8C5F4R5 | Fibrinogen C-terminal domain-containing protein OS=Gadus morhua OX=8049 PE=4 SV=1              | 25 | 6  | 8  | 6 | 264  | 29.5  | 6.42  | 24.09 | 6  | 1 |
| 4.19E+18 | IsMasterProtein | A0A8C5D935 | General transcription factor IIIC subunit 1 OS=Gadus morhua OX=8049 GN=gtf3c1 PE=4 SV=1        | 4  | 6  | 8  | 6 | 2420 | 267.7 | 6.86  | 18.78 | 6  | 1 |
| 4.52E+18 | IsMasterProtein | A0A8C5BRM3 | RNA helicase OS=Gadus morhua OX=8049 PE=3 SV=1                                                 | 23 | 12 | 13 | 6 | 680  | 74.7  | 8.97  | 34.01 | 12 | 1 |
| 4.61E+18 | IsMasterProtein | A0A8C5B4I7 | Protein AMBP OS=Gadus morhua OX=8049 GN=LOC115538969 PE=3 SV=1                                 | 26 | 6  | 8  | 6 | 380  | 41.7  | 5.49  | 26.65 | 6  | 1 |
| 5.1E+18  | IsMasterProtein | A0A8C5ATV3 | Succinyl-CoA:3-ketoacid-coenzyme A transferase OS=Gadus morhua OX=8049 GN=oxct1a PE=3 SV=1     | 13 | 6  | 6  | 6 | 561  | 61    | 7.09  | 13.55 | 6  | 1 |
| 5.32E+18 | IsMasterProtein | A0A8C4ZEA1 | Glucosidase, alpha; neutral AB OS=Gadus morhua OX=8049 PE=3 SV=1                               | 9  | 6  | 6  | 6 | 945  | 107.1 | 6.09  | 15.4  | 6  | 1 |
| 5.39E+18 | IsMasterProtein | A0A8C5BT07 | 40S ribosomal protein S18 OS=Gadus morhua OX=8049 GN=rps18 PE=3 SV=1                           | 34 | 6  | 7  | 6 | 152  | 17.8  | 10.77 | 19.24 | 6  | 1 |
| 6.36E+18 | IsMasterProtein | A0A8C5BF41 | 40S ribosomal protein S19 OS=Gadus morhua OX=8049 PE=3 SV=1                                    | 36 | 6  | 6  | 6 | 187  | 20.7  | 10.46 | 15.92 | 6  | 1 |
| 6.52E+18 | IsMasterProtein | A0A8C4ZN86 | Palmitoyl-protein thioesterase 1 OS=Gadus morhua OX=8049 GN=ppt1 PE=3 SV=1                     | 26 | 6  | 7  | 6 | 303  | 34    | 7.37  | 21.6  | 6  | 1 |
| 6.55E+18 | IsMasterProtein | A0A8C4ZT40 | H15 domain-containing protein OS=Gadus morhua OX=8049 PE=3 SV=1                                | 31 | 14 | 21 | 6 | 315  | 33.2  | 10.83 | 56.56 | 14 | 1 |
| 6.71E+18 | IsMasterProtein | A0A8C4ZF86 | Ubiquitin-40S ribosomal protein S27a OS=Gadus morhua OX=8049 GN=rps27a PE=3 SV=1               | 42 | 6  | 19 | 6 | 156  | 18    | 9.64  | 50.27 | 6  | 1 |
| 6.71E+18 | IsMasterProtein | A0A8C5BCZ5 | Lipase, gastric OS=Gadus morhua OX=8049 GN=lipf PE=4 SV=1                                      | 23 | 6  | 7  | 6 | 361  | 40.6  | 6.81  | 20.57 | 6  | 1 |
| 6.86E+18 | IsMasterProtein | A0A8C5B753 | Uncharacterized protein OS=Gadus morhua OX=8049 PE=4 SV=1                                      | 4  | 6  | 6  | 6 | 2757 | 311.6 | 5.73  | 16.45 | 6  | 1 |
| 7.07E+18 | IsMasterProtein | A0A8C5CTK9 | Ezrin a OS=Gadus morhua OX=8049 GN=ezra PE=4 SV=1                                              | 16 | 11 | 11 | 6 | 586  | 68.9  | 5.99  | 26.61 | 11 | 1 |
| 7.37E+18 | IsMasterProtein | A0A8C5D1F7 | WW domain-containing protein OS=Gadus morhua OX=8049 PE=4 SV=1                                 | 13 | 6  | 6  | 6 | 922  | 100.2 | 4.27  | 14.11 | 6  | 1 |
| 7.83E+18 | IsMasterProtein | A0A8C5AW87 | Lamin-A-like OS=Gadus morhua OX=8049 GN=LOC115535752 PE=3 SV=1                                 | 12 | 7  | 7  | 6 | 575  | 64.7  | 5.9   | 17.52 | 7  | 1 |
| 9.21E+18 | IsMasterProtein | A0A8C4Z2M4 | Tetraspanin OS=Gadus morhua OX=8049 GN=cd81a PE=3 SV=1                                         | 23 | 6  | 7  | 6 | 238  | 26.3  | 6.18  | 20.13 | 6  | 1 |
| -9.1E+18 | IsMasterProtein | A0A8C5B226 | 40S SA_C domain-containing protein OS=Gadus morhua OX=8049 PE=3 SV=1                           | 29 | 5  | 6  | 5 | 283  | 31.2  | 5.16  | 21.87 | 5  | 1 |

|          |                 |            |                                                                                                                    |    |    |    |   |      |       |      |       |    |   |
|----------|-----------------|------------|--------------------------------------------------------------------------------------------------------------------|----|----|----|---|------|-------|------|-------|----|---|
| -9E+18   | IsMasterProtein | A0A8C5A5K3 | Uncharacterized protein OS=Gadus morhua OX=8049 PE=3 SV=1                                                          | 22 | 5  | 8  | 5 | 285  | 31.3  | 5.01 | 24.49 | 5  | 1 |
| -8.9E+18 | IsMasterProtein | A0A8C5ACK3 | Annexin OS=Gadus morhua OX=8049 GN=anxa3b PE=3 SV=1                                                                | 16 | 5  | 6  | 5 | 316  | 34.5  | 5.95 | 15.32 | 5  | 1 |
| -8.9E+18 | IsMasterProtein | A0A8C5AK48 | LPS-responsive vesicle trafficking, beach and anchor containing OS=Gadus morhua OX=8049 PE=4 SV=1                  | 3  | 6  | 6  | 5 | 2801 | 308.2 | 5.36 | 17.42 | 6  | 1 |
| -8.9E+18 | IsMasterProtein | A0A8C5F9E5 | Cathepsin H OS=Gadus morhua OX=8049 GN=CTSH PE=3 SV=1                                                              | 20 | 5  | 6  | 5 | 310  | 34.4  | 5.45 | 16.71 | 5  | 1 |
| -8.7E+18 | IsMasterProtein | A0A8C5FD89 | Alpha-1,4 glucan phosphorylase OS=Gadus morhua OX=8049 GN=pygm PE=3 SV=1                                           | 9  | 6  | 6  | 5 | 755  | 87.2  | 6.98 | 20.27 | 6  | 1 |
| -8.7E+18 | IsMasterProtein | A0A8C4ZCL5 | Uncharacterized protein OS=Gadus morhua OX=8049 PE=3 SV=1                                                          | 4  | 5  | 5  | 5 | 1919 | 219   | 5.58 | 12.29 | 5  | 1 |
| -8.6E+18 | IsMasterProtein | A0A8C4ZYP9 | Asparaginase OS=Gadus morhua OX=8049 PE=4 SV=1                                                                     | 10 | 5  | 5  | 5 | 572  | 62.8  | 5.52 | 12.53 | 5  | 1 |
| -8.6E+18 | IsMasterProtein | A0A8C5A395 | Hephaestin-like protein 1 OS=Gadus morhua OX=8049 GN=LOC115547043 PE=3 SV=1                                        | 7  | 5  | 6  | 5 | 1107 | 123.9 | 5.4  | 17.07 | 5  | 1 |
| -8.5E+18 | IsMasterProtein | A0A8C5BAN6 | Hexokinase OS=Gadus morhua OX=8049 GN=LOC115540429 PE=3 SV=1                                                       | 7  | 5  | 5  | 5 | 923  | 103.4 | 6.05 | 13.82 | 5  | 1 |
| -8.1E+18 | IsMasterProtein | A0A8C5AHD0 | DNA-directed RNA polymerase subunit OS=Gadus morhua OX=8049 GN=polr1a PE=3 SV=1                                    | 7  | 5  | 5  | 5 | 1623 | 182.6 | 7.91 | 13.55 | 5  | 1 |
| -8E+18   | IsMasterProtein | A0A8C5AFU2 | Ribosomal S7 domain-containing protein OS=Gadus morhua OX=8049 PE=3 SV=1                                           | 19 | 5  | 8  | 5 | 214  | 23.9  | 9.69 | 17.14 | 5  | 1 |
| -8E+18   | IsMasterProtein | A0A8C5CT12 | Chloride intracellular channel protein OS=Gadus morhua OX=8049 GN=cltc4 PE=3 SV=1                                  | 33 | 5  | 7  | 5 | 233  | 26.3  | 5.96 | 23.54 | 5  | 1 |
| -8E+18   | IsMasterProtein | A0A8C5BIQ8 | Succinate dehydrogenase [ubiquinone] flavoprotein subunit, mitochondrial OS=Gadus morhua OX=8049 GN=sdha PE=3 SV=1 | 9  | 5  | 5  | 5 | 635  | 69.5  | 6.3  | 13.72 | 5  | 1 |
| -7.9E+18 | IsMasterProtein | A0A8C5CHV7 | Copine-1-like OS=Gadus morhua OX=8049 GN=CPNE1 PE=3 SV=1                                                           | 11 | 5  | 5  | 5 | 547  | 59.9  | 6.11 | 13.28 | 5  | 1 |
| -7.9E+18 | IsMasterProtein | A0A8C4Z0U1 | Isoleucine--tRNA ligase OS=Gadus morhua OX=8049 PE=3 SV=1                                                          | 7  | 5  | 5  | 5 | 1217 | 139   | 6.67 | 13.1  | 5  | 1 |
| -7.8E+18 | IsMasterProtein | A0A8C5FK29 | E3 ubiquitin-protein ligase OS=Gadus morhua OX=8049 PE=3 SV=1                                                      | 5  | 5  | 6  | 5 | 1999 | 220.2 | 8.48 | 12.2  | 5  | 1 |
| -7.7E+18 | IsMasterProtein | A0A8C5BGJ3 | Vacuolar protein sorting-associated protein 4B-like OS=Gadus morhua OX=8049 GN=LOC115556024 PE=3 SV=1              | 23 | 5  | 5  | 5 | 438  | 48.8  | 6.4  | 15.24 | 5  | 1 |
| -7.7E+18 | IsMasterProtein | A0A8C4ZWW9 | EF-hand calcium binding domain 7 OS=Gadus morhua OX=8049 GN=efcab7 PE=3 SV=1                                       | 9  | 5  | 7  | 5 | 564  | 61.2  | 6.19 | 16.93 | 5  | 1 |
| -7.6E+18 | IsMasterProtein | A0A8C5FS69 | Endoplasmic reticulum protein 44 OS=Gadus morhua OX=8049 PE=4 SV=1                                                 | 17 | 5  | 7  | 5 | 395  | 45.2  | 5.44 | 23.04 | 5  | 1 |
| -7.5E+18 | IsMasterProtein | A0A8C5FTZ2 | High mobility group box 1 OS=Gadus morhua OX=8049 PE=3 SV=1                                                        | 27 | 6  | 8  | 5 | 242  | 27.6  | 6.93 | 21.23 | 6  | 1 |
| -7.4E+18 | IsMasterProtein | A0A8C5BIW0 | Myosin, heavy chain 14, non-muscle OS=Gadus morhua OX=8049 PE=3 SV=1                                               | 4  | 5  | 6  | 5 | 2027 | 233.4 | 5.55 | 15.38 | 5  | 1 |
| -7.4E+18 | IsMasterProtein | A0A8C5BYD6 | Dynein, axonemal, heavy chain 6 OS=Gadus morhua OX=8049 PE=3 SV=1                                                  | 3  | 5  | 6  | 5 | 3993 | 449.6 | 5.57 | 15.39 | 5  | 1 |
| -7.4E+18 | IsMasterProtein | A0A8C5B8H6 | Isocitrate dehydrogenase [NADP] OS=Gadus morhua OX=8049 PE=3 SV=1                                                  | 14 | 5  | 7  | 5 | 424  | 47.9  | 6.98 | 19.27 | 5  | 1 |
| -7.4E+18 | IsMasterProtein | A0A8C4ZRZ7 | Collagen, type XI, alpha 1a OS=Gadus morhua OX=8049 PE=4 SV=1                                                      | 13 | 9  | 10 | 5 | 1270 | 133.2 | 5.05 | 28.96 | 9  | 1 |
| -7.1E+18 | IsMasterProtein | A0A8C4ZU59 | Junction plakoglobin OS=Gadus morhua OX=8049 PE=3 SV=1                                                             | 10 | 6  | 6  | 5 | 694  | 76.3  | 6.57 | 16.27 | 6  | 1 |
| -7E+18   | IsMasterProtein | A0A8C4Z383 | Coronin OS=Gadus morhua OX=8049 GN=coro1b PE=3 SV=1                                                                | 15 | 5  | 5  | 5 | 501  | 55    | 6.11 | 13.72 | 5  | 1 |
| -6.9E+18 | IsMasterProtein | A0A8C5AX36 | Apoptotic chromatin condensation inducer 1b OS=Gadus morhua OX=8049 GN=acin1b PE=4 SV=1                            | 6  | 5  | 5  | 5 | 1351 | 144.3 | 6.96 | 13.64 | 5  | 1 |
| -6.9E+18 | IsMasterProtein | A0A8C5ADL4 | TSC complex subunit 1b OS=Gadus morhua OX=8049 GN=tsc1b PE=4 SV=1                                                  | 7  | 5  | 5  | 5 | 1369 | 147.7 | 7.59 | 13.77 | 5  | 1 |
| -6.9E+18 | IsMasterProtein | A0A8C5B260 | Heterogeneous nuclear ribonucleoprotein Ub OS=Gadus morhua OX=8049 GN=hnrnpub PE=4 SV=1                            | 6  | 5  | 6  | 5 | 847  | 91.9  | 5.2  | 17    | 5  | 1 |
| -6.9E+18 | IsMasterProtein | A0A8C5AQ57 | Aspartate--tRNA ligase, cytoplasmic OS=Gadus morhua OX=8049 GN=dars1 PE=3 SV=1                                     | 14 | 5  | 5  | 5 | 497  | 56.3  | 7.01 | 13.4  | 5  | 1 |
| -6.9E+18 | IsMasterProtein | A0A8C5BDE3 | Uncharacterized protein OS=Gadus morhua OX=8049 PE=4 SV=1                                                          | 4  | 5  | 5  | 5 | 2039 | 224.4 | 5.22 | 11.74 | 5  | 1 |
| -6.8E+18 | IsMasterProtein | A0A8C5AA24 | Calpain-2 catalytic subunit OS=Gadus morhua OX=8049 GN=LOC115539934 PE=3 SV=1                                      | 13 | 5  | 6  | 5 | 670  | 76.4  | 5.45 | 16.69 | 5  | 1 |
| -6.7E+18 | IsMasterProtein | A0A8C5FNC0 | Isocitrate dehydrogenase [NADP] OS=Gadus morhua OX=8049 GN=idh2 PE=3 SV=1                                          | 18 | 7  | 9  | 5 | 450  | 50.9  | 6.54 | 25.85 | 7  | 1 |
| -6.6E+18 | IsMasterProtein | A0A8C5B239 | Uncharacterized protein OS=Gadus morhua OX=8049 PE=3 SV=1                                                          | 18 | 17 | 23 | 5 | 1342 | 148.1 | 5.6  | 82.79 | 17 | 1 |
| -6.6E+18 | IsMasterProtein | A0A8C4Z2K5 | Enoyl-CoA hydratase OS=Gadus morhua OX=8049 GN=hadhab PE=3 SV=1                                                    | 10 | 5  | 8  | 5 | 762  | 82    | 8.68 | 20.14 | 5  | 1 |
| -6.3E+18 | IsMasterProtein | A0A8C5AQ01 | Uncharacterized protein OS=Gadus morhua OX=8049 PE=4 SV=1                                                          | 5  | 5  | 8  | 5 | 2505 | 266.9 | 6.05 | 24.5  | 5  | 1 |
| -6.3E+18 | IsMasterProtein | A0A8C5B9Q5 | Eukaryotic translation initiation factor 4A1A OS=Gadus morhua OX=8049 GN=eif4a1a PE=3 SV=1                         | 35 | 8  | 12 | 5 | 410  | 46.5  | 7.21 | 38.95 | 8  | 1 |

|          |                 |             |                                                                                                                             |    |    |    |   |      |       |      |        |    |   |
|----------|-----------------|-------------|-----------------------------------------------------------------------------------------------------------------------------|----|----|----|---|------|-------|------|--------|----|---|
| -6.2E+18 | IsMasterProtein | A0A8C4ZEB4  | YEATS domain containing 2 OS=Gadus morhua OX=8049 GN=yats2 PE=4 SV=1                                                        | 10 | 5  | 5  | 5 | 1417 | 148.3 | 9.11 | 14.66  | 5  | 1 |
| -6.1E+18 | IsMasterProtein | A0A8C5BVR8  | Eukaryotic translation initiation factor 4, gamma 2a OS=Gadus morhua OX=8049 GN=eif4g2a PE=3 SV=1                           | 7  | 5  | 6  | 5 | 826  | 94.2  | 7.08 | 15.03  | 5  | 1 |
| -6E+18   | IsMasterProtein | A0A8C4ZE04  | Signal-induced proliferation-associated 1 like 1 OS=Gadus morhua OX=8049 GN=sipa1l1 PE=4 SV=1                               | 5  | 5  | 5  | 5 | 1918 | 204.5 | 8.84 | 13.27  | 5  | 1 |
| -6E+18   | IsMasterProtein | A0A8C5ARB9  | Patatin-like phospholipase domain containing 7b OS=Gadus morhua OX=8049 GN=pnpla7b PE=3 SV=1                                | 6  | 5  | 5  | 5 | 1415 | 156.4 | 8    | 13.2   | 5  | 1 |
| -5.7E+18 | IsMasterProtein | A0A8C5BPU1  | 2-oxoisovalerate dehydrogenase subunit alpha OS=Gadus morhua OX=8049 GN=bckdha PE=3 SV=1                                    | 25 | 5  | 5  | 5 | 444  | 50.8  | 8.19 | 15.2   | 5  | 1 |
| -5.7E+18 | IsMasterProtein | A0A8C5FHK7  | Contactin 1a OS=Gadus morhua OX=8049 GN=CNTN1 PE=4 SV=1                                                                     | 7  | 5  | 5  | 5 | 987  | 109.3 | 5.88 | 13.57  | 5  | 1 |
| -5.7E+18 | IsMasterProtein | A0A8C5FEZ6  | 14-3-3 protein beta/alpha-1-like OS=Gadus morhua OX=8049 GN=LOC11553599 PE=3 SV=1                                           | 32 | 8  | 10 | 5 | 248  | 28.1  | 4.78 | 27.55  | 8  | 1 |
| -5.7E+18 | IsMasterProtein | A0A8C5FLQ1  | Transmembrane protein 132e OS=Gadus morhua OX=8049 GN=tmem132e PE=3 SV=1                                                    | 5  | 5  | 5  | 5 | 1123 | 122.1 | 5.24 | 13.2   | 5  | 1 |
| -5.4E+18 | IsMasterProtein | A0A8C5F7C5  | Malic enzyme OS=Gadus morhua OX=8049 GN=me3 PE=3 SV=1                                                                       | 12 | 5  | 6  | 5 | 595  | 65.7  | 6.98 | 16.52  | 5  | 1 |
| -5.3E+18 | IsMasterProtein | A0A8C4ZJZ1  | Elongation factor Tu OS=Gadus morhua OX=8049 GN=tufm PE=3 SV=1                                                              | 17 | 5  | 5  | 5 | 443  | 48.9  | 6.76 | 12.13  | 5  | 1 |
| -5.2E+18 | IsMasterProtein | A0A8C5CCW8  | Uncharacterized protein OS=Gadus morhua OX=8049 PE=3 SV=1                                                                   | 8  | 5  | 5  | 5 | 944  | 99    | 4.98 | 13.2   | 5  | 1 |
| -5.1E+18 | IsMasterProtein | A0A8C5ADN5  | RAB, member RAS oncogene family-like 6b OS=Gadus morhua OX=8049 GN=rabl6b PE=4 SV=1                                         | 10 | 5  | 5  | 5 | 797  | 87    | 5.54 | 13.21  | 5  | 1 |
| -5.1E+18 | IsMasterProtein | A0A8C4YWJ2  | Peptidylprolyl isomerase OS=Gadus morhua OX=8049 PE=4 SV=1                                                                  | 8  | 5  | 5  | 5 | 569  | 63.1  | 5.19 | 13.5   | 5  | 1 |
| -4.9E+18 | IsMasterProtein | A0A8C5F9V4  | Uncharacterized protein OS=Gadus morhua OX=8049 PE=3 SV=1                                                                   | 3  | 5  | 5  | 5 | 3060 | 348.6 | 5.99 | 12.2   | 5  | 1 |
| -4.7E+18 | IsMasterProtein | A0A8C4YYC8  | ADP/ATP translocase OS=Gadus morhua OX=8049 GN=si:dkey-251i10.1 PE=3 SV=1                                                   | 23 | 7  | 7  | 5 | 298  | 32.7  | 9.79 | 16.94  | 7  | 1 |
| -4.7E+18 | IsMasterProtein | A0A8C5CLP8  | UDP-glucose 6-dehydrogenase OS=Gadus morhua OX=8049 GN=ugdh PE=3 SV=1                                                       | 15 | 5  | 5  | 5 | 480  | 53.3  | 8.07 | 16.59  | 5  | 1 |
| -4.6E+18 | IsMasterProtein | A0A8C4ZF99  | Basement membrane-specific heparan sulfate proteoglycan core protein-like OS=Gadus morhua OX=8049 GN=LOC115539906 PE=4 SV=1 | 22 | 5  | 5  | 5 | 379  | 40.3  | 8.46 | 16.78  | 5  | 1 |
| -4.5E+18 | IsMasterProtein | A0A8C5F3L5  | DNA-(apurinic or pyrimidinic site) lyase OS=Gadus morhua OX=8049 GN=rps3 PE=3 SV=1                                          | 28 | 5  | 7  | 5 | 246  | 26.9  | 9.66 | 21.04  | 5  | 1 |
| -4.4E+18 | IsMasterProtein | A0A8C5D062  | Coagulation factor X OS=Gadus morhua OX=8049 GN=f10 PE=4 SV=1                                                               | 16 | 5  | 5  | 5 | 525  | 57.4  | 6.92 | 13.35  | 5  | 1 |
| -4.4E+18 | IsMasterProtein | A0A8C5CC93  | Fibrillin 1 OS=Gadus morhua OX=8049 GN=FBN1 PE=4 SV=1                                                                       | 2  | 5  | 5  | 5 | 2843 | 307   | 4.79 | 12.59  | 5  | 1 |
| -4.3E+18 | IsMasterProtein | A0A8C5FNH3  | Proteasome 26S subunit, non-ATPase 12 OS=Gadus morhua OX=8049 GN=PSMD12 PE=3 SV=1                                           | 20 | 5  | 6  | 5 | 457  | 53    | 6.95 | 16.04  | 5  | 1 |
| -4.2E+18 | IsMasterProtein | A0A8C5BEL7  | Kinectin 1 OS=Gadus morhua OX=8049 GN=ktn1 PE=4 SV=1                                                                        | 7  | 5  | 5  | 5 | 1268 | 140.6 | 5.16 | 14.08  | 5  | 1 |
| -4.2E+18 | IsMasterProtein | A0A8C4YV30  | Annexin OS=Gadus morhua OX=8049 GN=anxa5b PE=3 SV=1                                                                         | 20 | 5  | 5  | 5 | 314  | 34.4  | 5.49 | 14.54  | 5  | 1 |
| -4E+18   | IsMasterProtein | A0A8C4Z3N5  | Chromosome 21 C6orf58 homolog OS=Gadus morhua OX=8049 GN=c21h6orf58 PE=3 SV=1                                               | 17 | 5  | 5  | 5 | 359  | 39.3  | 5.21 | 13.53  | 5  | 1 |
| -3.6E+18 | IsMasterProtein | A0A8C5BRD2  | Tight junction protein 3 OS=Gadus morhua OX=8049 GN=tjp3 PE=3 SV=1                                                          | 7  | 7  | 7  | 5 | 1352 | 149.6 | 8.15 | 16.59  | 7  | 1 |
| -3.6E+18 | IsMasterProtein | A0A8C4ZPE3  | Dihydrolipoyl dehydrogenase OS=Gadus morhua OX=8049 GN=dldh PE=3 SV=1                                                       | 16 | 5  | 5  | 5 | 508  | 53.4  | 7.68 | 15.82  | 5  | 1 |
| -3.5E+18 | IsMasterProtein | A0A8C5FTW0  | Insulin-like growth factor-binding protein 5 OS=Gadus morhua OX=8049 GN=LOC115533059 PE=4 SV=1                              | 26 | 5  | 5  | 5 | 257  | 28.3  | 8.38 | 15.53  | 5  | 1 |
| -3.2E+18 | IsMasterProtein | A0A8C5B2W2  | Uncharacterized protein OS=Gadus morhua OX=8049 PE=4 SV=1                                                                   | 26 | 5  | 7  | 5 | 219  | 24    | 6    | 17.44  | 5  | 1 |
| -3.1E+18 | IsMasterProtein | A0A8C5B569  | MAM domain containing glycosylphosphatidylinositol anchor 1 OS=Gadus morhua OX=8049 GN=mdga1 PE=4 SV=1                      | 9  | 5  | 5  | 5 | 951  | 106.1 | 8.73 | 12.82  | 5  | 1 |
| -3E+18   | IsMasterProtein | A0A8C5ABN4  | Sorting nexin 1a OS=Gadus morhua OX=8049 GN=snx1a PE=3 SV=1                                                                 | 12 | 5  | 5  | 5 | 847  | 91.4  | 4.6  | 13.93  | 5  | 1 |
| -2.9E+18 | IsMasterProtein | A0A8C5AVB3  | Neurofilament medium polypeptide OS=Gadus morhua OX=8049 PE=3 SV=1                                                          | 7  | 5  | 6  | 5 | 1273 | 137   | 4.86 | 15.85  | 5  | 1 |
| -2.8E+18 | IsMasterProtein | A0A8C5AQW9  | Uncharacterized protein OS=Gadus morhua OX=8049 PE=4 SV=1                                                                   | 12 | 5  | 5  | 5 | 699  | 74.9  | 5.49 | 14.22  | 5  | 1 |
| -2.8E+18 | IsMasterProtein | A0A8C5C3A1  | Glucosidase 2 subunit beta OS=Gadus morhua OX=8049 GN=prksh PE=4 SV=1                                                       | 8  | 5  | 5  | 5 | 551  | 61.4  | 4.42 | 13.17  | 5  | 1 |
| -2.8E+18 | IsMasterProtein | A0A8C5BBM7  | Heat shock cognate 70 kDa protein OS=Gadus morhua OX=8049 GN=LOC115546994 PE=3 SV=1                                         | 41 | 26 | 36 | 5 | 700  | 77.2  | 5.44 | 109.53 | 26 | 1 |
| -2.6E+18 | IsMasterProtein | cRAP_Q14533 | Keratin, type II cuticular Hb1 OS=Homo sapiens GN=KRT81 PE=1 SV=3                                                           | 26 | 12 | 15 | 5 | 505  | 54.9  | 5.47 | 43.83  | 12 | 1 |

|          |                 |            |                                                                                                           |    |    |     |   |      |       |       |        |    |   |
|----------|-----------------|------------|-----------------------------------------------------------------------------------------------------------|----|----|-----|---|------|-------|-------|--------|----|---|
| -2.5E+18 | IsMasterProtein | B8XJS7     | Hemoglobin beta 2 OS=Gadus morhua OX=8049 GN=LOC115530778 PE=2 SV=1                                       | 88 | 14 | 120 | 5 | 147  | 16.8  | 6.38  | 443.99 | 14 | 1 |
| -2.5E+18 | IsMasterProtein | A0A8C5F3P5 | Metalloproteinase inhibitor 2 OS=Gadus morhua OX=8049 GN=timp2a PE=3 SV=1                                 | 22 | 5  | 5   | 5 | 220  | 24.5  | 6.33  | 16.67  | 5  | 1 |
| -2.4E+18 | IsMasterProtein | A0A8C5F7T9 | Keratin, type I cytoskeletal 13-like OS=Gadus morhua OX=8049 GN=LOC115540539 PE=4 SV=1                    | 18 | 6  | 6   | 5 | 417  | 47.1  | 5.31  | 16.29  | 6  | 1 |
| -2.3E+18 | IsMasterProtein | A0A8C5BA71 | IST1 homolog OS=Gadus morhua OX=8049 PE=3 SV=1                                                            | 16 | 5  | 7   | 5 | 474  | 52    | 7.88  | 19.8   | 5  | 1 |
| -2.2E+18 | IsMasterProtein | A0A8C4ZP37 | Tubulin beta chain OS=Gadus morhua OX=8049 GN=tubb5 PE=3 SV=1                                             | 63 | 25 | 83  | 5 | 444  | 49.5  | 4.86  | 262.26 | 25 | 1 |
| -2.1E+18 | IsMasterProtein | A0A8C5A5Z5 | Cathepsin D OS=Gadus morhua OX=8049 GN=ctsd PE=3 SV=1                                                     | 18 | 5  | 5   | 5 | 389  | 42.3  | 6.42  | 15.28  | 5  | 1 |
| -2.1E+18 | IsMasterProtein | A0A8C5CZ11 | 40S ribosomal protein S2 OS=Gadus morhua OX=8049 GN=rps2 PE=3 SV=1                                        | 5  | 5  | 5   | 5 | 993  | 113.2 | 8.91  | 12.12  | 5  | 1 |
| -2E+18   | IsMasterProtein | A0A8C5CKX3 | Family with sequence similarity 184 member B OS=Gadus morhua OX=8049 GN=fam184b PE=4 SV=1                 | 7  | 5  | 5   | 5 | 1321 | 153.7 | 5.97  | 12.8   | 5  | 1 |
| -1.8E+18 | IsMasterProtein | A0A8C5AU99 | Cancer-related regulator of actin dynamics homolog OS=Gadus morhua OX=8049 GN=CRACD PE=4 SV=1             | 12 | 5  | 5   | 5 | 1047 | 118.5 | 6.87  | 15.13  | 5  | 1 |
| -1.8E+18 | IsMasterProtein | A0A8C4Z578 | Catalase OS=Gadus morhua OX=8049 GN=cat PE=3 SV=1                                                         | 16 | 5  | 5   | 5 | 516  | 58.2  | 7.59  | 14.61  | 5  | 1 |
| -1.7E+18 | IsMasterProtein | A0A8C4ZTE5 | High mobility group-T protein-like OS=Gadus morhua OX=8049 GN=LOC115561521 PE=3 SV=1                      | 34 | 5  | 5   | 5 | 174  | 20.4  | 9.89  | 15.65  | 5  | 1 |
| -1.6E+18 | IsMasterProtein | A0A8C4ZZR9 | Phospholipid-transporting ATPase OS=Gadus morhua OX=8049 PE=3 SV=1                                        | 7  | 5  | 5   | 5 | 1136 | 129.1 | 6.8   | 12.46  | 5  | 1 |
| -1.5E+18 | IsMasterProtein | A0A8C4Z277 | Tumor necrosis factor receptor superfamily member 11B-like OS=Gadus morhua OX=8049 GN=TNFRSF11B PE=4 SV=1 | 14 | 5  | 5   | 5 | 434  | 48    | 8.38  | 13.23  | 5  | 1 |
| -1.5E+18 | IsMasterProtein | A0A8C5AA17 | Aspartate aminotransferase OS=Gadus morhua OX=8049 GN=GOT1 PE=3 SV=1                                      | 19 | 5  | 5   | 5 | 411  | 45.9  | 6.8   | 17.21  | 5  | 1 |
| -1.5E+18 | IsMasterProtein | A0A8C5BI74 | 60S ribosomal protein L7a OS=Gadus morhua OX=8049 GN=rpl7a PE=3 SV=1                                      | 22 | 5  | 8   | 5 | 266  | 29.9  | 10.56 | 26.46  | 5  | 1 |
| -1.5E+18 | IsMasterProtein | A0A8C4YYS6 | Si:ch211-186j3.6 OS=Gadus morhua OX=8049 PE=4 SV=1                                                        | 3  | 5  | 5   | 5 | 2403 | 264.7 | 5.03  | 13.36  | 5  | 1 |
| -1.4E+18 | IsMasterProtein | A0A8C5ADZ3 | Protein-serine/threonine phosphatase OS=Gadus morhua OX=8049 GN=ctdp1 PE=4 SV=1                           | 8  | 5  | 7   | 5 | 1057 | 114.9 | 4.79  | 16.92  | 5  | 1 |
| -1.4E+18 | IsMasterProtein | A0A8C4ZCP9 | Protein S100 OS=Gadus morhua OX=8049 PE=3 SV=1                                                            | 42 | 5  | 15  | 5 | 93   | 10.4  | 4.64  | 55.46  | 5  | 1 |
| -1.3E+18 | IsMasterProtein | A0A8C5CYC2 | T-complex protein 1 subunit alpha OS=Gadus morhua OX=8049 GN=TCP1 PE=3 SV=1                               | 12 | 5  | 31  | 5 | 546  | 59.4  | 8.21  | 88.72  | 5  | 1 |
| -8.2E+17 | IsMasterProtein | A0A8C5BHU3 | Golgin B1 OS=Gadus morhua OX=8049 GN=golgb1 PE=4 SV=1                                                     | 3  | 5  | 5   | 5 | 3116 | 352.1 | 4.77  | 11.81  | 5  | 1 |
| -8E+17   | IsMasterProtein | A0A8C4Z6D3 | HHIP-like 1 OS=Gadus morhua OX=8049 GN=HHIPL1 PE=4 SV=1                                                   | 9  | 5  | 5   | 5 | 799  | 89.5  | 6.23  | 12.3   | 5  | 1 |
| -7.2E+17 | IsMasterProtein | A0A8C4ZA55 | Ceruloplasmin OS=Gadus morhua OX=8049 GN=cp PE=3 SV=1                                                     | 28 | 25 | 41  | 5 | 1068 | 121.1 | 6.84  | 128.26 | 25 | 1 |
| -5E+17   | IsMasterProtein | A0A8C5BE63 | Dachsous cadherin-related 1 OS=Gadus morhua OX=8049 GN=dchs1 PE=4 SV=1                                    | 4  | 5  | 6   | 5 | 2696 | 288.8 | 4.94  | 16.75  | 5  | 1 |
| -1.9E+17 | IsMasterProtein | A0A8C5FLF2 | Far upstream element (FUSE) binding protein 1 OS=Gadus morhua OX=8049 PE=4 SV=1                           | 11 | 5  | 5   | 5 | 648  | 68.1  | 8.05  | 14.48  | 5  | 1 |
| 2.68E+17 | IsMasterProtein | A0A8C5D7R8 | Myosin IXAb OS=Gadus morhua OX=8049 GN=myo9ab PE=3 SV=1                                                   | 5  | 5  | 5   | 5 | 2288 | 257.4 | 8.47  | 14.1   | 5  | 1 |
| 5.36E+17 | IsMasterProtein | A0A8C5ARZ5 | Phosphopyruvate hydratase OS=Gadus morhua OX=8049 GN=eno3 PE=3 SV=1                                       | 26 | 8  | 9   | 5 | 435  | 47.4  | 6.28  | 24.68  | 8  | 1 |
| 6.44E+17 | IsMasterProtein | A0A8C5FR97 | AU RNA binding protein/enoyl-CoA hydratase OS=Gadus morhua OX=8049 GN=auh PE=3 SV=1                       | 21 | 5  | 6   | 5 | 322  | 34.4  | 9.28  | 18.06  | 5  | 1 |
| 7.52E+17 | IsMasterProtein | A0A8C5BSU8 | Acyl-CoA dehydrogenase very long chain OS=Gadus morhua OX=8049 GN=acadv1 PE=3 SV=1                        | 14 | 5  | 6   | 5 | 665  | 71.4  | 7.62  | 20.35  | 5  | 1 |
| 8.15E+17 | IsMasterProtein | A0A8C5BUI6 | Type I cytokeratin, enveloping layer OS=Gadus morhua OX=8049 PE=4 SV=1                                    | 20 | 7  | 9   | 5 | 465  | 50.7  | 6.07  | 24.97  | 7  | 1 |
| 9.08E+17 | IsMasterProtein | A0A8C4ZQV6 | Low density lipoprotein receptor-related protein 11 OS=Gadus morhua OX=8049 GN=lrp11 PE=4 SV=1            | 9  | 5  | 6   | 5 | 606  | 65.5  | 5.94  | 18.23  | 5  | 1 |
| 9.46E+17 | IsMasterProtein | A0A8C5F697 | TGF_BETA_2 domain-containing protein OS=Gadus morhua OX=8049 PE=3 SV=1                                    | 14 | 5  | 6   | 5 | 419  | 45.8  | 9.55  | 17.66  | 5  | 1 |
| 1.02E+18 | IsMasterProtein | A0A8C4ZM34 | Aminopeptidase OS=Gadus morhua OX=8049 PE=3 SV=1                                                          | 6  | 5  | 6   | 5 | 954  | 107.9 | 6.76  | 18.58  | 5  | 1 |
| 1.22E+18 | IsMasterProtein | A0A8C5CVR5 | Uncharacterized protein OS=Gadus morhua OX=8049 PE=3 SV=1                                                 | 23 | 21 | 30  | 5 | 1071 | 117.6 | 6.24  | 98.53  | 21 | 1 |
| 1.54E+18 | IsMasterProtein | A0A8C5C1P6 | Small nuclear ribonucleoprotein 200 (U5) OS=Gadus morhua OX=8049 GN=SNRNP200 PE=3 SV=1                    | 4  | 5  | 6   | 5 | 2083 | 238.2 | 6.09  | 20.97  | 5  | 1 |
| 1.6E+18  | IsMasterProtein | A0A8C4Z530 | Ribosomal protein L15 OS=Gadus morhua OX=8049 GN=rpl15 PE=3 SV=1                                          | 20 | 5  | 5   | 5 | 204  | 24.1  | 11.46 | 11.61  | 5  | 1 |

|          |                 |            |                                                                                                               |    |    |    |   |      |       |       |       |    |   |
|----------|-----------------|------------|---------------------------------------------------------------------------------------------------------------|----|----|----|---|------|-------|-------|-------|----|---|
| 2E+18    | IsMasterProtein | A0A8C4Z2C5 | Neuroplastin a OS=Gadus morhua OX=8049 GN=nptna PE=4 SV=1                                                     | 17 | 5  | 10 | 5 | 399  | 44.4  | 6.95  | 26.94 | 5  | 1 |
| 2.02E+18 | IsMasterProtein | A0A8C4ZS41 | Insulin-like growth factor binding protein, acid labile subunit OS=Gadus morhua OX=8049 GN=igfals PE=4 SV=1   | 12 | 5  | 6  | 5 | 577  | 64.9  | 7.03  | 17.92 | 5  | 1 |
| 2.2E+18  | IsMasterProtein | A0A8C5AW06 | Thrombospondin type 1 domain containing 4 OS=Gadus morhua OX=8049 GN=THSD4 PE=4 SV=1                          | 13 | 5  | 5  | 5 | 925  | 100.3 | 7.53  | 15.18 | 5  | 1 |
| 2.7E+18  | IsMasterProtein | A0A8C5CJ33 | Ig-like domain-containing protein OS=Gadus morhua OX=8049 PE=3 SV=1                                           | 25 | 12 | 17 | 5 | 389  | 44.7  | 5.76  | 48.96 | 12 | 1 |
| 2.72E+18 | IsMasterProtein | A0A8C5CCK4 | Uncharacterized protein OS=Gadus morhua OX=8049 PE=4 SV=1                                                     | 6  | 5  | 5  | 5 | 3266 | 365.3 | 6.52  | 12.54 | 5  | 1 |
| 3.02E+18 | IsMasterProtein | A0A8C5AIT6 | CAP-GLY domain containing linker protein 1a OS=Gadus morhua OX=8049 PE=4 SV=1                                 | 4  | 5  | 5  | 5 | 2180 | 242.5 | 5.21  | 12.45 | 5  | 1 |
| 3.15E+18 | IsMasterProtein | A0A8C4ZCU6 | Electron transfer flavoprotein subunit beta OS=Gadus morhua OX=8049 GN=etfb PE=3 SV=1                         | 22 | 5  | 5  | 5 | 254  | 27.4  | 8.69  | 13.05 | 5  | 1 |
| 3.25E+18 | IsMasterProtein | A0A8C5FUY5 | Uncharacterized protein OS=Gadus morhua OX=8049 PE=4 SV=1                                                     | 6  | 5  | 5  | 5 | 1679 | 185.6 | 6.15  | 14.3  | 5  | 1 |
| 3.38E+18 | IsMasterProtein | A0A8C5F8Z6 | Acidic (leucine-rich) nuclear phosphoprotein 32 family, member B OS=Gadus morhua OX=8049 GN=anp32b PE=3 SV=1  | 30 | 9  | 11 | 5 | 266  | 29.8  | 4.01  | 32.92 | 9  | 1 |
| 3.76E+18 | IsMasterProtein | A0A8C4ZKC2 | Prohibitin OS=Gadus morhua OX=8049 GN=phb PE=3 SV=1                                                           | 19 | 5  | 7  | 5 | 271  | 29.8  | 5.27  | 17    | 5  | 1 |
| 4.23E+18 | IsMasterProtein | A0A8C4ZJD3 | 40S ribosomal protein S6 OS=Gadus morhua OX=8049 PE=3 SV=1                                                    | 10 | 6  | 6  | 5 | 756  | 85    | 9.82  | 16.39 | 6  | 1 |
| 4.38E+18 | IsMasterProtein | A0A8C5CP99 | Ribosomal protein L3 OS=Gadus morhua OX=8049 GN=rpl3 PE=3 SV=1                                                | 12 | 5  | 6  | 5 | 420  | 48    | 10.14 | 14.25 | 5  | 1 |
| 4.56E+18 | IsMasterProtein | A0A8C4Z2D5 | Integral membrane protein 2 OS=Gadus morhua OX=8049 GN=ITM2B PE=3 SV=1                                        | 39 | 5  | 6  | 5 | 262  | 30.3  | 5.15  | 18.38 | 5  | 1 |
| 4.59E+18 | IsMasterProtein | A0A8C5F6T4 | Uncharacterized protein OS=Gadus morhua OX=8049 PE=4 SV=1                                                     | 12 | 5  | 5  | 5 | 293  | 32.6  | 9.11  | 13.04 | 5  | 1 |
| 4.8E+18  | IsMasterProtein | A0A8C4Z931 | Phosphoglycerate mutase OS=Gadus morhua OX=8049 PE=3 SV=1                                                     | 20 | 5  | 5  | 5 | 362  | 41    | 7.77  | 14.68 | 5  | 1 |
| 4.87E+18 | IsMasterProtein | A0A8C5CUM8 | Annexin OS=Gadus morhua OX=8049 GN=anxa1a PE=3 SV=1                                                           | 17 | 5  | 6  | 5 | 325  | 36    | 6.24  | 16.45 | 5  | 1 |
| 5.5E+18  | IsMasterProtein | A0A8C4ZLA0 | 60S acidic ribosomal protein P2 OS=Gadus morhua OX=8049 GN=rplp2 PE=3 SV=1                                    | 74 | 5  | 7  | 5 | 117  | 11.6  | 4.5   | 29.35 | 5  | 1 |
| 6.88E+18 | IsMasterProtein | A0A8C5BDU7 | Myosin-10-like OS=Gadus morhua OX=8049 GN=LOC115560902 PE=3 SV=1                                              | 6  | 7  | 7  | 5 | 1994 | 229.6 | 5.69  | 18.16 | 7  | 1 |
| 6.95E+18 | IsMasterProtein | A0A8C5BP47 | 26S proteasome non-ATPase regulatory subunit 1 OS=Gadus morhua OX=8049 PE=3 SV=1                              | 9  | 5  | 5  | 5 | 968  | 107.5 | 5.33  | 16.11 | 5  | 1 |
| 7.38E+18 | IsMasterProtein | A0A8C4ZGK7 | Cytochrome c oxidase assembly protein COX18, mitochondrial OS=Gadus morhua OX=8049 GN=igfbp7 PE=4 SV=1        | 26 | 5  | 6  | 5 | 261  | 26.9  | 6.33  | 17.36 | 5  | 1 |
| 7.49E+18 | IsMasterProtein | A0A8C4ZUH7 | BRICHOS domain-containing protein OS=Gadus morhua OX=8049 PE=3 SV=1                                           | 24 | 5  | 11 | 5 | 320  | 35.6  | 5.14  | 35.29 | 5  | 1 |
| 7.55E+18 | IsMasterProtein | A0A8C4YVL0 | G protein-coupled receptor, class C, group 5, member C OS=Gadus morhua OX=8049 GN=gprc5c PE=4 SV=1            | 17 | 5  | 7  | 5 | 416  | 44    | 6.33  | 20.55 | 5  | 1 |
| 7.6E+18  | IsMasterProtein | A0A8C4Z2N5 | MANSC domain containing 4 OS=Gadus morhua OX=8049 GN=manse4 PE=4 SV=1                                         | 9  | 5  | 12 | 5 | 476  | 51.8  | 8.79  | 46.25 | 5  | 1 |
| 7.91E+18 | IsMasterProtein | A0A8C4ZDI8 | Carboxypeptidase OS=Gadus morhua OX=8049 PE=3 SV=1                                                            | 17 | 5  | 6  | 5 | 471  | 52.6  | 6.9   | 15.39 | 5  | 1 |
| 8.13E+18 | IsMasterProtein | A0A8C5CWM7 | Mucin-17-like OS=Gadus morhua OX=8049 GN=LOC115537092 PE=4 SV=1                                               | 2  | 5  | 5  | 5 | 2924 | 316.2 | 4.75  | 11.32 | 5  | 1 |
| 8.6E+18  | IsMasterProtein | A0A8C5FMA7 | Lumican OS=Gadus morhua OX=8049 GN=lum PE=3 SV=1                                                              | 22 | 5  | 5  | 5 | 346  | 38.5  | 6.32  | 15.64 | 5  | 1 |
| 8.74E+18 | IsMasterProtein | A0A8C5A2S0 | Ankyrin repeat and BTB/POZ domain-containing protein 2-like OS=Gadus morhua OX=8049 GN=LOC115559313 PE=4 SV=1 | 14 | 5  | 5  | 5 | 1050 | 115.4 | 6.35  | 14.12 | 5  | 1 |
| 8.75E+18 | IsMasterProtein | A0A8C4Z0L1 | Cytochrome c oxidase subunit 4 OS=Gadus morhua OX=8049 GN=LOC115558779 PE=3 SV=1                              | 31 | 5  | 5  | 5 | 169  | 19.6  | 9.41  | 12.57 | 5  | 1 |
| -9.2E+18 | IsMasterProtein | A0A8C5BJL2 | Tight junction protein 2a (zona occludens 2) OS=Gadus morhua OX=8049 GN=tjp2a PE=3 SV=1                       | 5  | 6  | 6  | 4 | 1256 | 141   | 7.42  | 14.1  | 6  | 1 |
| -9.2E+18 | IsMasterProtein | A0A8C5B1X6 | Oxoglutarate dehydrogenase (succinyl-transferring) OS=Gadus morhua OX=8049 GN=OGDH PE=3 SV=1                  | 8  | 7  | 8  | 4 | 1013 | 114   | 6.38  | 23.85 | 7  | 1 |
| -9.2E+18 | IsMasterProtein | A0A8C4ZR55 | Purine-rich element binding protein Ab OS=Gadus morhua OX=8049 GN=purab PE=3 SV=1                             | 37 | 7  | 7  | 4 | 281  | 31.3  | 6.95  | 21.08 | 7  | 1 |
| -9.1E+18 | IsMasterProtein | A0A8C5FRX8 | Aldo-keto reductase family 1 member B1-like OS=Gadus morhua OX=8049 GN=LOC115531901 PE=3 SV=1                 | 19 | 4  | 4  | 4 | 315  | 35.4  | 8.53  | 10.78 | 4  | 1 |
| -9E+18   | IsMasterProtein | A0A8C5AIT9 | Golgin A3 OS=Gadus morhua OX=8049 GN=golga3 PE=4 SV=1                                                         | 3  | 4  | 4  | 4 | 1545 | 172.1 | 5.29  | 9.53  | 4  | 1 |
| -9E+18   | IsMasterProtein | A0A8C5FWC4 | FZ domain-containing protein OS=Gadus morhua OX=8049 PE=4 SV=1                                                | 5  | 4  | 4  | 4 | 1203 | 130.2 | 6.44  | 9.62  | 4  | 1 |
| -8.9E+18 | IsMasterProtein | A0A8C5FG66 | Core histone macro-H2A OS=Gadus morhua OX=8049 GN=LOC115559527 PE=4 SV=1                                      | 12 | 4  | 5  | 4 | 363  | 39.3  | 9.76  | 14.61 | 4  | 1 |



|          |                 |            |                                                                                                                      |    |   |    |   |      |       |       |       |   |   |
|----------|-----------------|------------|----------------------------------------------------------------------------------------------------------------------|----|---|----|---|------|-------|-------|-------|---|---|
| -8.9E+18 | IsMasterProtein | A0A8C4ZB40 | Hydroxysteroid dehydrogenase like 2 OS=Gadus morhua OX=8049 GN=hsdl2 PE=4 SV=1                                       | 13 | 4 | 4  | 4 | 420  | 45    | 7.52  | 11.88 | 4 | 1 |
| -8.9E+18 | IsMasterProtein | A0A8C5CST1 | Elongation factor G, mitochondrial OS=Gadus morhua OX=8049 GN=gfm1 PE=3 SV=1                                         | 11 | 4 | 4  | 4 | 793  | 88    | 6.55  | 11.62 | 4 | 1 |
| -8.8E+18 | IsMasterProtein | A0A8C4ZH04 | Uncharacterized protein OS=Gadus morhua OX=8049 PE=3 SV=1                                                            | 3  | 4 | 4  | 4 | 2305 | 258.4 | 7.03  | 10.04 | 4 | 1 |
| -8.8E+18 | IsMasterProtein | A0A8C5BQP1 | BAH domain and coiled-coil containing 1b OS=Gadus morhua OX=8049 GN=bahcc1b PE=4 SV=1                                | 2  | 4 | 5  | 4 | 2955 | 315   | 8.68  | 12.91 | 4 | 1 |
| -8.7E+18 | IsMasterProtein | A0A8C5AHG1 | Fructose-bisphosphate aldolase OS=Gadus morhua OX=8049 GN=aldocb PE=3 SV=1                                           | 15 | 5 | 6  | 4 | 363  | 39.5  | 5.72  | 14.04 | 5 | 1 |
| -8.6E+18 | IsMasterProtein | A0A8C4YST1 | Heterochromatin protein 1-binding protein 3 OS=Gadus morhua OX=8049 GN=hp1bp3 PE=4 SV=1                              | 7  | 4 | 4  | 4 | 580  | 62.3  | 10.02 | 10.21 | 4 | 1 |
| -8.6E+18 | IsMasterProtein | A0A8C5BUW0 | Prohibitin OS=Gadus morhua OX=8049 GN=phb2a PE=3 SV=1                                                                | 16 | 4 | 4  | 4 | 316  | 35.2  | 9.76  | 10.46 | 4 | 1 |
| -8.6E+18 | IsMasterProtein | A0A8C4ZDE2 | Glutamate receptor, ionotropic, N-methyl D-aspartate 2A, a OS=Gadus morhua OX=8049 GN=grin2aa PE=3 SV=1              | 7  | 4 | 4  | 4 | 1468 | 164.5 | 6.76  | 10.97 | 4 | 1 |
| -8.5E+18 | IsMasterProtein | A0A8C4ZXB1 | 26S proteasome non-ATPase regulatory subunit 2 OS=Gadus morhua OX=8049 GN=PSMD2 PE=3 SV=1                            | 6  | 4 | 4  | 4 | 894  | 98.9  | 5.54  | 11.68 | 4 | 1 |
| -8.4E+18 | IsMasterProtein | A0A8C5AUJ6 | Uncharacterized protein OS=Gadus morhua OX=8049 PE=4 SV=1                                                            | 5  | 4 | 4  | 4 | 1353 | 143.5 | 9.64  | 9.2   | 4 | 1 |
| -8.3E+18 | IsMasterProtein | A0A8C5BLC7 | Poly(rC) binding protein 2 OS=Gadus morhua OX=8049 GN=PCBP2 PE=4 SV=1                                                | 15 | 4 | 4  | 4 | 365  | 38.1  | 9.44  | 11.57 | 4 | 1 |
| -8.3E+18 | IsMasterProtein | A0A8C5F9B4 | Isoaspartyl peptidase/L-asparaginase OS=Gadus morhua OX=8049 GN=asrg11 PE=3 SV=1                                     | 13 | 4 | 4  | 4 | 362  | 38.2  | 7.96  | 9.52  | 4 | 1 |
| -8.3E+18 | IsMasterProtein | A0A8C5FM95 | Kinesin family member 21A OS=Gadus morhua OX=8049 PE=3 SV=1                                                          | 5  | 5 | 5  | 4 | 1535 | 170.7 | 6.93  | 12.23 | 5 | 1 |
| -8.3E+18 | IsMasterProtein | A0A8C4Z572 | Neurofilament medium polypeptide OS=Gadus morhua OX=8049 GN=nefh PE=3 SV=1                                           | 17 | 5 | 5  | 4 | 870  | 98.5  | 4.81  | 12.03 | 5 | 1 |
| -8.2E+18 | IsMasterProtein | A0A8C4ZJE4 | Elongation factor 1-beta OS=Gadus morhua OX=8049 GN=eef1b2 PE=3 SV=1                                                 | 32 | 4 | 5  | 4 | 231  | 25.2  | 4.67  | 16.89 | 4 | 1 |
| -8.2E+18 | IsMasterProtein | A0A8C5FV10 | Adenylosuccinate lyase OS=Gadus morhua OX=8049 GN=adsl PE=3 SV=1                                                     | 17 | 4 | 4  | 4 | 467  | 52.8  | 7.02  | 9.62  | 4 | 1 |
| -8.1E+18 | IsMasterProtein | A0A8C5FKS7 | Voltage-dependent anion-selective channel protein 2 OS=Gadus morhua OX=8049 GN=vdac2 PE=3 SV=1                       | 27 | 6 | 8  | 4 | 290  | 31    | 8.6   | 21.77 | 6 | 1 |
| -8.1E+18 | IsMasterProtein | A0A8C5FJL2 | Uncharacterized protein OS=Gadus morhua OX=8049 PE=4 SV=1                                                            | 4  | 4 | 4  | 4 | 1759 | 198.6 | 6.61  | 10.98 | 4 | 1 |
| -8.1E+18 | IsMasterProtein | A0A8C5AHE1 | Peroxiredoxin 3 OS=Gadus morhua OX=8049 PE=4 SV=1                                                                    | 18 | 4 | 7  | 4 | 239  | 26.3  | 7.49  | 18.72 | 4 | 1 |
| -8.1E+18 | IsMasterProtein | A0A8C5BFX4 | Acyl-CoA thioesterase 9, tandem duplicate 1 OS=Gadus morhua OX=8049 GN=ACOT9 PE=4 SV=1                               | 10 | 4 | 4  | 4 | 380  | 42.6  | 8.24  | 10.09 | 4 | 1 |
| -8.1E+18 | IsMasterProtein | A0A8C5AAZ5 | Dmx-like 2 OS=Gadus morhua OX=8049 PE=4 SV=1                                                                         | 2  | 4 | 4  | 4 | 2896 | 320   | 6.67  | 11.41 | 4 | 1 |
| -8E+18   | IsMasterProtein | A0A8C5BVG9 | Peptidyl-prolyl cis-trans isomerase OS=Gadus morhua OX=8049 GN=LOC115531927 PE=3 SV=1                                | 19 | 4 | 10 | 4 | 201  | 21.5  | 8.73  | 30.88 | 4 | 1 |
| -8E+18   | IsMasterProtein | A0A8C5CFK0 | RUN and SH3 domain containing 2 OS=Gadus morhua OX=8049 GN=rusc2 PE=4 SV=1                                           | 4  | 4 | 4  | 4 | 1489 | 160.6 | 6.62  | 10.99 | 4 | 1 |
| -8E+18   | IsMasterProtein | A0A8C5A3M8 | Protein RIC1 homolog OS=Gadus morhua OX=8049 GN=ric1 PE=4 SV=1                                                       | 5  | 4 | 5  | 4 | 1470 | 160.4 | 6.01  | 12.79 | 4 | 1 |
| -7.9E+18 | IsMasterProtein | A0A8C4ZP32 | Envoplakin a OS=Gadus morhua OX=8049 PE=4 SV=1                                                                       | 6  | 4 | 5  | 4 | 1689 | 194   | 5.82  | 13.62 | 4 | 1 |
| -7.9E+18 | IsMasterProtein | A0A8C4ZZG1 | Protein MON2 homolog OS=Gadus morhua OX=8049 PE=3 SV=1                                                               | 7  | 4 | 4  | 4 | 1645 | 181.3 | 6.48  | 12.6  | 4 | 1 |
| -7.9E+18 | IsMasterProtein | A0A8C5BSR3 | Calmodulin 2a (phosphorylase kinase, delta) OS=Gadus morhua OX=8049 GN=calm1b PE=4 SV=1                              | 20 | 4 | 5  | 4 | 180  | 20    | 4.34  | 15.91 | 4 | 1 |
| -7.8E+18 | IsMasterProtein | A0A8C5AEQ8 | Rho-associated protein kinase OS=Gadus morhua OX=8049 GN=ROCK2 PE=3 SV=1                                             | 4  | 4 | 5  | 4 | 1378 | 159.1 | 6.23  | 14.33 | 4 | 1 |
| -7.7E+18 | IsMasterProtein | A0A8C4ZE03 | Acidic leucine-rich nuclear phosphoprotein 32 family member D-like OS=Gadus morhua OX=8049 GN=LOC115529167 PE=3 SV=1 | 28 | 8 | 9  | 4 | 253  | 28.5  | 4.02  | 23.29 | 8 | 1 |
| -7.6E+18 | IsMasterProtein | A0A8C5A0Z9 | Inositol polyphosphate-5-phosphatase A OS=Gadus morhua OX=8049 GN=PWWP2B PE=4 SV=1                                   | 9  | 4 | 4  | 4 | 718  | 78.9  | 8.68  | 10.09 | 4 | 1 |
| -7.6E+18 | IsMasterProtein | A0A8C5CPF5 | Transformation/transcription domain-associated protein OS=Gadus morhua OX=8049 PE=4 SV=1                             | 2  | 4 | 5  | 4 | 3778 | 428.7 | 8.34  | 11.69 | 4 | 1 |
| -7.6E+18 | IsMasterProtein | A0A8C5CVT1 | DNA helicase OS=Gadus morhua OX=8049 GN=chd4b PE=4 SV=1                                                              | 5  | 4 | 5  | 4 | 1822 | 206   | 6.2   | 14.12 | 4 | 1 |
| -7.6E+18 | IsMasterProtein | A0A8C4Z972 | Serine and arginine rich splicing factor 3b OS=Gadus morhua OX=8049 GN=srsf3b PE=4 SV=1                              | 27 | 4 | 4  | 4 | 165  | 19.3  | 11.71 | 9.24  | 4 | 1 |
| -7.5E+18 | IsMasterProtein | A0A8C5CIP5 | Threonine--tRNA ligase OS=Gadus morhua OX=8049 PE=3 SV=1                                                             | 9  | 6 | 6  | 4 | 690  | 78.8  | 6.86  | 11.82 | 6 | 1 |



|          |                 |            |                                                                                                                    |    |   |    |   |      |       |      |       |   |   |
|----------|-----------------|------------|--------------------------------------------------------------------------------------------------------------------|----|---|----|---|------|-------|------|-------|---|---|
| -7.5E+18 | IsMasterProtein | A0A8C5AB35 | Asparagine--tRNA ligase OS=Gadus morhua OX=8049 GN=NARS1 PE=4 SV=1                                                 | 9  | 4 | 4  | 4 | 544  | 61.7  | 6.02 | 11.48 | 4 | 1 |
| -7.4E+18 | IsMasterProtein | A0A8C5CWU8 | Ubiquitin specific peptidase 43b OS=Gadus morhua OX=8049 GN=usp43b PE=4 SV=1                                       | 7  | 4 | 7  | 4 | 1264 | 137.3 | 8.7  | 18.64 | 4 | 1 |
| -7.4E+18 | IsMasterProtein | A0A8C4ZF97 | Tumor susceptibility 101a OS=Gadus morhua OX=8049 GN=tsg101a PE=3 SV=1                                             | 12 | 4 | 5  | 4 | 390  | 43.9  | 6.28 | 13.98 | 4 | 1 |
| -7.4E+18 | IsMasterProtein | A0A8C4ZLV1 | Collagen, type IX, alpha 3 OS=Gadus morhua OX=8049 GN=col9a3 PE=4 SV=1                                             | 12 | 4 | 4  | 4 | 678  | 63.7  | 8.88 | 12.19 | 4 | 1 |
| -7.3E+18 | IsMasterProtein | A0A8C5FDF8 | F-actin-capping protein subunit beta OS=Gadus morhua OX=8049 GN=capzb PE=3 SV=1                                    | 22 | 4 | 4  | 4 | 272  | 30.5  | 6.27 | 9.81  | 4 | 1 |
| -7.3E+18 | IsMasterProtein | A0A8C4ZKN5 | Acidic (leucine-rich) nuclear phosphoprotein 32 family, member A OS=Gadus morhua OX=8049 GN=anp32a PE=3 SV=1       | 27 | 7 | 9  | 4 | 258  | 29.3  | 4.09 | 24.03 | 7 | 1 |
| -7.2E+18 | IsMasterProtein | A0A8C5FWY9 | Dedicator of cytokinesis 9 OS=Gadus morhua OX=8049 GN=DOCK9 PE=3 SV=1                                              | 4  | 5 | 6  | 4 | 2011 | 228.7 | 7.81 | 14.22 | 5 | 1 |
| -7.2E+18 | IsMasterProtein | A0A8C5BLG2 | Ash1 (absent, small, or homeotic)-like (Drosophila) OS=Gadus morhua OX=8049 PE=4 SV=1                              | 2  | 4 | 5  | 4 | 3116 | 340.2 | 9.39 | 12.41 | 4 | 1 |
| -7.1E+18 | IsMasterProtein | A0A8C5CXI4 | Rho GDP-dissociation inhibitor 1-like OS=Gadus morhua OX=8049 GN=ARHGDIA PE=3 SV=1                                 | 34 | 4 | 4  | 4 | 203  | 23    | 5.11 | 12.55 | 4 | 1 |
| -7.1E+18 | IsMasterProtein | A0A8C5C5M1 | Myosin IIIA OS=Gadus morhua OX=8049 PE=3 SV=1                                                                      | 4  | 4 | 4  | 4 | 1794 | 201.8 | 6.32 | 11.27 | 4 | 1 |
| -7.1E+18 | IsMasterProtein | A0A8C5AJ14 | Sodium channel protein OS=Gadus morhua OX=8049 PE=3 SV=1                                                           | 4  | 4 | 4  | 4 | 1986 | 224.6 | 6.21 | 10.29 | 4 | 1 |
| -7.1E+18 | IsMasterProtein | A0A8C5B3H1 | Uncharacterized protein OS=Gadus morhua OX=8049 PE=4 SV=1                                                          | 5  | 4 | 4  | 4 | 822  | 89.1  | 6.3  | 11.96 | 4 | 1 |
| -7.1E+18 | IsMasterProtein | A0A8C4Z0M0 | Transgelin OS=Gadus morhua OX=8049 GN=TAGLN PE=3 SV=1                                                              | 24 | 4 | 4  | 4 | 197  | 21.6  | 8.88 | 10.21 | 4 | 1 |
| -6.8E+18 | IsMasterProtein | A0A8C4ZIZ6 | RNA helicase OS=Gadus morhua OX=8049 GN=ddx52 PE=3 SV=1                                                            | 11 | 4 | 4  | 4 | 588  | 65.7  | 9.88 | 10.28 | 4 | 1 |
| -6.8E+18 | IsMasterProtein | A0A8C5APV0 | Peptidylprolyl isomerase OS=Gadus morhua OX=8049 PE=4 SV=1                                                         | 9  | 4 | 4  | 4 | 565  | 62.1  | 5.03 | 10.94 | 4 | 1 |
| -6.8E+18 | IsMasterProtein | A0A8C5CK27 | HTH CENPB-type domain-containing protein OS=Gadus morhua OX=8049 PE=4 SV=1                                         | 13 | 4 | 4  | 4 | 450  | 51.1  | 9.28 | 8.72  | 4 | 1 |
| -6.6E+18 | IsMasterProtein | A0A8C5A3K2 | SAC1 like phosphatidylinositol phosphatase a OS=Gadus morhua OX=8049 GN=sacm1la PE=4 SV=1                          | 12 | 4 | 4  | 4 | 499  | 56.6  | 8.24 | 9.72  | 4 | 1 |
| -6.5E+18 | IsMasterProtein | A0A8C5AAL8 | Zinc finger protein 687b OS=Gadus morhua OX=8049 GN=znf687b PE=3 SV=1                                              | 5  | 4 | 4  | 4 | 1462 | 152.4 | 6.98 | 9.95  | 4 | 1 |
| -6.5E+18 | IsMasterProtein | A0A8C5FQI7 | Membrane-bound transcription factor peptidase, site 1 OS=Gadus morhua OX=8049 GN=mbtfs1 PE=4 SV=1                  | 8  | 4 | 4  | 4 | 923  | 103.2 | 7.2  | 11.32 | 4 | 1 |
| -6.2E+18 | IsMasterProtein | A0A8C4YXE2 | Pre-mRNA processing factor 8 OS=Gadus morhua OX=8049 GN=prpf8 PE=4 SV=1                                            | 2  | 4 | 4  | 4 | 2338 | 273.7 | 8.85 | 9.54  | 4 | 1 |
| -6.1E+18 | IsMasterProtein | A0A8C5AXS2 | Polyadenylate-binding protein OS=Gadus morhua OX=8049 PE=3 SV=1                                                    | 11 | 5 | 5  | 4 | 529  | 59.4  | 8.47 | 12.79 | 5 | 1 |
| -6.1E+18 | IsMasterProtein | A0A8C5FJH3 | Calcium-transporting ATPase OS=Gadus morhua OX=8049 GN=atp2a2b PE=3 SV=1                                           | 13 | 9 | 11 | 4 | 1031 | 113.2 | 5.31 | 30.67 | 9 | 1 |
| -6.1E+18 | IsMasterProtein | A0A8C5BWU3 | Far upstream element-binding protein 3-like OS=Gadus morhua OX=8049 GN=LOC115545032 PE=4 SV=1                      | 9  | 4 | 4  | 4 | 520  | 56.8  | 9.33 | 10.64 | 4 | 1 |
| -6E+18   | IsMasterProtein | A0A8C5AQH0 | Dolichyl-diphosphooligosaccharide--protein glycosyltransferase subunit 2 OS=Gadus morhua OX=8049 GN=rpn2 PE=3 SV=1 | 10 | 4 | 4  | 4 | 608  | 66.2  | 5.2  | 13.07 | 4 | 1 |
| -6E+18   | IsMasterProtein | A0A8C5CBT5 | Pleckstrin homology domain containing, family H (with MyTH4 domain) member 1 OS=Gadus morhua OX=8049 PE=4 SV=1     | 5  | 4 | 4  | 4 | 1303 | 141.5 | 7.83 | 11.34 | 4 | 1 |
| -6E+18   | IsMasterProtein | A0A8C5CAE9 | Tight junction protein 1a OS=Gadus morhua OX=8049 GN=tjp1a PE=3 SV=1                                               | 5  | 4 | 4  | 4 | 1848 | 202.5 | 6.33 | 10.13 | 4 | 1 |
| -5.9E+18 | IsMasterProtein | A0A8C4Z2G2 | NAD(P)H oxidase (H(2)O(2)-forming) OS=Gadus morhua OX=8049 PE=3 SV=1                                               | 5  | 4 | 4  | 4 | 1521 | 173.1 | 7.37 | 10.34 | 4 | 1 |
| -5.9E+18 | IsMasterProtein | A0A8C4ZTI3 | Collagen, type V, alpha 2a OS=Gadus morhua OX=8049 GN=col5a2a PE=4 SV=1                                            | 5  | 4 | 4  | 4 | 1497 | 144.1 | 7.09 | 9.98  | 4 | 1 |
| -5.9E+18 | IsMasterProtein | A0A8C5CA52 | EF-hand domain-containing protein OS=Gadus morhua OX=8049 PE=3 SV=1                                                | 4  | 4 | 5  | 4 | 2420 | 269.9 | 8.59 | 14.05 | 4 | 1 |
| -5.8E+18 | IsMasterProtein | A0A8C5CSJ7 | Uncharacterized protein OS=Gadus morhua OX=8049 PE=3 SV=1                                                          | 3  | 4 | 5  | 4 | 2404 | 254.5 | 6.83 | 14.46 | 4 | 1 |
| -5.7E+18 | IsMasterProtein | A0A8C5F495 | CEP170_C domain-containing protein OS=Gadus morhua OX=8049 PE=3 SV=1                                               | 5  | 4 | 5  | 4 | 1566 | 168   | 8.29 | 12.3  | 4 | 1 |
| -5.7E+18 | IsMasterProtein | A0A8C5FEP2 | Inositol 1,4,5-trisphosphate receptor OS=Gadus morhua OX=8049 GN=ITPR1 PE=3 SV=1                                   | 4  | 4 | 4  | 4 | 2718 | 309.7 | 6.07 | 11.62 | 4 | 1 |
| -5.6E+18 | IsMasterProtein | A0A8C5CEK6 | Copine 8 OS=Gadus morhua OX=8049 GN=CPNE8 PE=3 SV=1                                                                | 18 | 5 | 6  | 4 | 511  | 56.9  | 6.1  | 19.07 | 5 | 1 |

|          |                 |            |                                                                                                                  |    |    |    |   |      |       |       |       |    |   |
|----------|-----------------|------------|------------------------------------------------------------------------------------------------------------------|----|----|----|---|------|-------|-------|-------|----|---|
| -5.4E+18 | IsMasterProtein | A0A8C5C9U5 | DNA helicase OS=Gadus morhua OX=8049 PE=3 SV=1                                                                   | 2  | 4  | 4  | 4 | 2878 | 316.4 | 7.84  | 9.04  | 4  | 1 |
| -5.4E+18 | IsMasterProtein | A0A8C5CVP9 | Carboxypeptidase OS=Gadus morhua OX=8049 GN=scepe1 PE=3 SV=1                                                     | 11 | 4  | 5  | 4 | 437  | 48    | 5.14  | 14.33 | 4  | 1 |
| -5.4E+18 | IsMasterProtein | A0A8C5BSU4 | Transforming growth factor-beta-induced protein ig-h3 OS=Gadus morhua OX=8049 GN=tgfbj PE=4 SV=1                 | 10 | 4  | 4  | 4 | 682  | 75.1  | 7.47  | 13.24 | 4  | 1 |
| -5.3E+18 | IsMasterProtein | A0A8C4Z610 | 45 kDa calcium-binding protein OS=Gadus morhua OX=8049 GN=sdf4 PE=3 SV=1                                         | 15 | 4  | 4  | 4 | 354  | 41.5  | 4.73  | 10.77 | 4  | 1 |
| -5.3E+18 | IsMasterProtein | A0A8C5AM14 | NADH dehydrogenase [ubiquinone] iron-sulfur protein 2, mitochondrial OS=Gadus morhua OX=8049 GN=ndufs2 PE=3 SV=1 | 8  | 4  | 5  | 4 | 536  | 60.6  | 6.29  | 12.16 | 4  | 1 |
| -5.1E+18 | IsMasterProtein | A0A8C5FX14 | Inositol polyphosphate-5-phosphatase F OS=Gadus morhua OX=8049 GN=inpp5f PE=4 SV=1                               | 6  | 4  | 4  | 4 | 1075 | 120.2 | 6.24  | 12.56 | 4  | 1 |
| -5.1E+18 | IsMasterProtein | A0A8C5CCJ8 | Alpha-ketoglutarate-dependent dioxygenase FTO OS=Gadus morhua OX=8049 PE=3 SV=1                                  | 7  | 4  | 5  | 4 | 505  | 57.3  | 7.93  | 11.73 | 4  | 1 |
| -5.1E+18 | IsMasterProtein | A0A8C5B1T6 | Midasin OS=Gadus morhua OX=8049 GN=MDN1 PE=3 SV=1                                                                | 2  | 4  | 4  | 4 | 4923 | 549.1 | 5.31  | 11.58 | 4  | 1 |
| -5.1E+18 | IsMasterProtein | A0A8C5A3E1 | Glutathione transferase OS=Gadus morhua OX=8049 GN=LOC115553606 PE=3 SV=1                                        | 18 | 4  | 5  | 4 | 238  | 28.1  | 8.27  | 13.95 | 4  | 1 |
| -5.1E+18 | IsMasterProtein | A0A8C4Z1J1 | ATP synthase subunit gamma OS=Gadus morhua OX=8049 GN=atp5f1c PE=3 SV=1                                          | 20 | 4  | 4  | 4 | 289  | 31.7  | 9.32  | 13.26 | 4  | 1 |
| -5E+18   | IsMasterProtein | A0A8C5BN57 | Tetraspanin OS=Gadus morhua OX=8049 GN=cd63 PE=3 SV=1                                                            | 21 | 4  | 4  | 4 | 271  | 30    | 7.05  | 10.19 | 4  | 1 |
| -5E+18   | IsMasterProtein | A0A8C5AMA3 | Pleckstrin homology and RhoGEF domain containing G1 OS=Gadus morhua OX=8049 GN=plekhg1 PE=4 SV=1                 | 4  | 4  | 4  | 4 | 1677 | 182.6 | 6.02  | 9.87  | 4  | 1 |
| -4.9E+18 | IsMasterProtein | A0A8C5ABK2 | Histone acetyltransferase OS=Gadus morhua OX=8049 GN=KAT6B PE=3 SV=1                                             | 3  | 4  | 4  | 4 | 2389 | 262.3 | 6.87  | 9.56  | 4  | 1 |
| -4.9E+18 | IsMasterProtein | A0A8C4Z172 | Plastin 3 (T isoform) OS=Gadus morhua OX=8049 GN=pls3 PE=4 SV=1                                                  | 9  | 5  | 5  | 4 | 627  | 70    | 5.25  | 12.88 | 5  | 1 |
| -4.9E+18 | IsMasterProtein | A0A8C5FKN4 | Neurexin 1 OS=Gadus morhua OX=8049 GN=NRXN1 PE=3 SV=1                                                            | 4  | 4  | 4  | 4 | 1502 | 164.9 | 5.95  | 10.56 | 4  | 1 |
| -4.8E+18 | IsMasterProtein | A0A8C5CLY5 | Protein HIRA OS=Gadus morhua OX=8049 PE=3 SV=1                                                                   | 10 | 4  | 5  | 4 | 983  | 107.5 | 7.84  | 13.38 | 4  | 1 |
| -4.8E+18 | IsMasterProtein | A0A8C4ZFZ2 | Peptidyl-prolyl cis-trans isomerase OS=Gadus morhua OX=8049 GN=LOC115545253 PE=3 SV=1                            | 27 | 4  | 5  | 4 | 164  | 17.5  | 7.85  | 13.68 | 4  | 1 |
| -4.8E+18 | IsMasterProtein | A0A8C5CTF4 | Uncharacterized protein OS=Gadus morhua OX=8049 PE=3 SV=1                                                        | 20 | 4  | 4  | 4 | 482  | 52.9  | 7.43  | 11.06 | 4  | 1 |
| -4.8E+18 | IsMasterProtein | A0A8C5BUC6 | 40S ribosomal protein S8 OS=Gadus morhua OX=8049 GN=rps8a PE=3 SV=1                                              | 19 | 4  | 4  | 4 | 204  | 23.7  | 10.3  | 10.83 | 4  | 1 |
| -4.8E+18 | IsMasterProtein | A0A8C4YWP3 | Uncharacterized protein OS=Gadus morhua OX=8049 PE=4 SV=1                                                        | 3  | 10 | 10 | 4 | 6833 | 762.8 | 5.44  | 27.5  | 10 | 1 |
| -4.7E+18 | IsMasterProtein | A0A8C5C0G9 | Proton-translocating NAD(P)(+) transhydrogenase OS=Gadus morhua OX=8049 GN=nnt2 PE=3 SV=1                        | 5  | 5  | 5  | 4 | 1053 | 111.2 | 6.07  | 13.12 | 5  | 1 |
| -4.6E+18 | IsMasterProtein | A0A8C4YWX4 | Protein transport protein SEC23 OS=Gadus morhua OX=8049 PE=3 SV=1                                                | 8  | 4  | 5  | 4 | 766  | 86.2  | 6.86  | 16.66 | 4  | 1 |
| -4.6E+18 | IsMasterProtein | A0A8C5FQN1 | Histone H2A OS=Gadus morhua OX=8049 PE=3 SV=1                                                                    | 39 | 5  | 6  | 4 | 136  | 14.8  | 10.92 | 18.73 | 5  | 1 |
| -4.6E+18 | IsMasterProtein | A0A8C4ZKJ2 | Valine--tRNA ligase OS=Gadus morhua OX=8049 GN=vars1 PE=3 SV=1                                                   | 7  | 4  | 4  | 4 | 1218 | 137.7 | 7.28  | 11.66 | 4  | 1 |
| -4.6E+18 | IsMasterProtein | A0A8C5AZW1 | Junctional cadherin 5 associated a OS=Gadus morhua OX=8049 PE=4 SV=1                                             | 8  | 4  | 5  | 4 | 1174 | 128.9 | 8.72  | 13.35 | 4  | 1 |
| -4.4E+18 | IsMasterProtein | A0A8C5CIM6 | Leucyl aminopeptidase family protein OS=Gadus morhua OX=8049 GN=zgc:152830 PE=3 SV=1                             | 12 | 4  | 4  | 4 | 534  | 58.3  | 6.93  | 12.75 | 4  | 1 |
| -4.4E+18 | IsMasterProtein | A0A8C5AIH9 | LsmAD domain-containing protein OS=Gadus morhua OX=8049 PE=3 SV=1                                                | 5  | 4  | 4  | 4 | 999  | 107.9 | 8.94  | 10.16 | 4  | 1 |
| -4.4E+18 | IsMasterProtein | A0A8C4ZK89 | Growth differentiation factor 11 OS=Gadus morhua OX=8049 GN=gdf11 PE=3 SV=1                                      | 11 | 4  | 4  | 4 | 389  | 44    | 7.18  | 11.4  | 4  | 1 |
| -4.2E+18 | IsMasterProtein | A0A8C5A4P9 | Dynein axonemal heavy chain 10 OS=Gadus morhua OX=8049 GN=DNAH10 PE=3 SV=1                                       | 2  | 4  | 4  | 4 | 4467 | 508.9 | 6.18  | 9.88  | 4  | 1 |
| -4E+18   | IsMasterProtein | A0A8C4ZY16 | E3 UFM1-protein ligase 1 OS=Gadus morhua OX=8049 GN=uf11 PE=3 SV=1                                               | 8  | 4  | 6  | 4 | 747  | 82.8  | 6.84  | 14.83 | 4  | 1 |
| -4E+18   | IsMasterProtein | A0A8C4ZBK7 | Complement component c3b, tandem duplicate 2 OS=Gadus morhua OX=8049 PE=4 SV=1                                   | 6  | 4  | 4  | 4 | 1680 | 187.2 | 7.47  | 11.18 | 4  | 1 |
| -3.9E+18 | IsMasterProtein | A0A8C5CMP3 | 60S ribosomal protein L8 OS=Gadus morhua OX=8049 GN=rpl8 PE=3 SV=1                                               | 23 | 4  | 4  | 4 | 148  | 16.2  | 11.8  | 9.61  | 4  | 1 |
| -3.8E+18 | IsMasterProtein | A0A8C4ZJT0 | Exocyst complex component 3-like protein 4 OS=Gadus morhua OX=8049 GN=LOC115544468 PE=3 SV=1                     | 11 | 4  | 5  | 4 | 737  | 83.8  | 7.27  | 12.68 | 4  | 1 |
| -3.7E+18 | IsMasterProtein | A0A8C4YZH3 | Ezrin b OS=Gadus morhua OX=8049 PE=4 SV=1                                                                        | 24 | 16 | 17 | 4 | 572  | 67.6  | 6.38  | 43.81 | 16 | 1 |
| -3.5E+18 | IsMasterProtein | A0A8C5FD50 | Uncharacterized protein OS=Gadus morhua OX=8049 PE=3 SV=1                                                        | 4  | 4  | 5  | 4 | 2711 | 292.4 | 5.99  | 11.25 | 4  | 1 |
| -3.4E+18 | IsMasterProtein | A0A8C5FEF6 | Uncharacterized protein OS=Gadus morhua OX=8049 PE=4 SV=1                                                        | 9  | 4  | 4  | 4 | 989  | 107.7 | 6.95  | 9.88  | 4  | 1 |

|          |                 |             |                                                                                                                                    |    |    |    |   |      |       |      |       |    |   |
|----------|-----------------|-------------|------------------------------------------------------------------------------------------------------------------------------------|----|----|----|---|------|-------|------|-------|----|---|
| -3.3E+18 | IsMasterProtein | A0A8C5BYW3  | Quinoid dihydropteridine reductase a OS=Gadus morhua OX=8049 PE=4 SV=1                                                             | 16 | 4  | 4  | 4 | 380  | 40.1  | 7.46 | 10.84 | 4  | 1 |
| -3.1E+18 | IsMasterProtein | A0A8C4Z1H5  | alpha-1,2-Mannosidase OS=Gadus morhua OX=8049 PE=3 SV=1                                                                            | 10 | 4  | 4  | 4 | 597  | 67.1  | 6.62 | 10.68 | 4  | 1 |
| -3.1E+18 | IsMasterProtein | A0A8C4ZBZ5  | Dehydrogenase E1 and transketolase domain containing 1 OS=Gadus morhua OX=8049 GN=dhtkd1 PE=3 SV=1                                 | 5  | 4  | 4  | 4 | 925  | 102.6 | 6.65 | 11.25 | 4  | 1 |
| -3E+18   | IsMasterProtein | A0A8C5FFW8  | Nuclear receptor corepressor 1 OS=Gadus morhua OX=8049 PE=3 SV=1                                                                   | 2  | 4  | 4  | 4 | 2181 | 240.6 | 7.81 | 9.06  | 4  | 1 |
| -2.9E+18 | IsMasterProtein | A0A8C4ZCZ7  | Uncharacterized protein OS=Gadus morhua OX=8049 PE=4 SV=1                                                                          | 10 | 4  | 4  | 4 | 607  | 66.3  | 7.14 | 10.71 | 4  | 1 |
| -2.8E+18 | IsMasterProtein | A0A8C5FWH1  | Complement component 7a OS=Gadus morhua OX=8049 GN=c7a PE=3 SV=1                                                                   | 7  | 4  | 4  | 4 | 857  | 94.7  | 6.39 | 10.74 | 4  | 1 |
| -2.7E+18 | IsMasterProtein | A0A8C5AY83  | Apolipoprotein Bb, tandem duplicate 1 OS=Gadus morhua OX=8049 PE=4 SV=1                                                            | 2  | 4  | 4  | 4 | 4505 | 496   | 6.52 | 10.28 | 4  | 1 |
| -2.5E+18 | IsMasterProtein | A0A8C5BXV9  | Dystrobrevin OS=Gadus morhua OX=8049 GN=dtna PE=3 SV=1                                                                             | 14 | 4  | 5  | 4 | 622  | 69.4  | 7.3  | 10.24 | 4  | 1 |
| -2.5E+18 | IsMasterProtein | A0A8C5C4R7  | General vesicular transport factor p115 OS=Gadus morhua OX=8049 GN=uso1 PE=3 SV=1                                                  | 6  | 4  | 4  | 4 | 970  | 107.5 | 5.36 | 11.22 | 4  | 1 |
| -2.4E+18 | IsMasterProtein | A0A8C5BC61  | Ryanodine receptor 3 OS=Gadus morhua OX=8049 PE=4 SV=1                                                                             | 1  | 4  | 5  | 4 | 4824 | 543.7 | 5.71 | 9.8   | 4  | 1 |
| -2.4E+18 | IsMasterProtein | A0A8C5D139  | Patatin-like phospholipase domain containing 2 OS=Gadus morhua OX=8049 GN=pnpla2 PE=4 SV=1                                         | 7  | 4  | 5  | 4 | 485  | 53.5  | 6.67 | 10.55 | 4  | 1 |
| -2.4E+18 | IsMasterProtein | A0A8C4Z2W2  | Uncharacterized protein OS=Gadus morhua OX=8049 PE=3 SV=1                                                                          | 3  | 4  | 4  | 4 | 2536 | 282.9 | 6.6  | 10.16 | 4  | 1 |
| -2.4E+18 | IsMasterProtein | A0A8C4ZTF2  | Tyrosine 3-monooxygenase/tryptophan 5-monooxygenase activation protein, eta polypeptide OS=Gadus morhua OX=8049 GN=ywhah PE=3 SV=1 | 38 | 7  | 9  | 4 | 245  | 27.8  | 4.84 | 25.76 | 7  | 1 |
| -2.3E+18 | IsMasterProtein | A0A8C5F819  | Apolipoprotein A-I-like OS=Gadus morhua OX=8049 GN=LOC115553333 PE=3 SV=1                                                          | 11 | 4  | 4  | 4 | 255  | 28.7  | 4.84 | 9.9   | 4  | 1 |
| -2.1E+18 | IsMasterProtein | A0A8C4ZMW7  | Non-specific serine/threonine protein kinase OS=Gadus morhua OX=8049 GN=dapk1 PE=4 SV=1                                            | 4  | 4  | 7  | 4 | 1420 | 157   | 7.14 | 17.46 | 4  | 1 |
| -2.1E+18 | IsMasterProtein | A0A8C5A431  | Glucose-6-phosphate 1-dehydrogenase OS=Gadus morhua OX=8049 GN=g6pd PE=3 SV=1                                                      | 10 | 4  | 4  | 4 | 504  | 57.8  | 7.75 | 9.94  | 4  | 1 |
| -2.1E+18 | IsMasterProtein | A0A8C4ZUZ7  | Uncharacterized protein OS=Gadus morhua OX=8049 PE=4 SV=1                                                                          | 3  | 4  | 4  | 4 | 3520 | 383.3 | 6.6  | 11.44 | 4  | 1 |
| -2.1E+18 | IsMasterProtein | A0A8C4Z0D7  | SPARC (osteonectin), cwcv and kazal like domains proteoglycan 3 OS=Gadus morhua OX=8049 GN=spock3 PE=4 SV=1                        | 17 | 4  | 4  | 4 | 395  | 43.9  | 5.49 | 11.07 | 4  | 1 |
| -1.9E+18 | IsMasterProtein | A0A8C4Z1K5  | Si:ch211-1e14.1 OS=Gadus morhua OX=8049 PE=4 SV=1                                                                                  | 4  | 5  | 5  | 4 | 1577 | 168.8 | 6.07 | 14.78 | 5  | 1 |
| -1.8E+18 | IsMasterProtein | A0A8C5BPK8  | Centrosomal protein 290 OS=Gadus morhua OX=8049 PE=4 SV=1                                                                          | 3  | 4  | 4  | 4 | 2194 | 251.2 | 8.12 | 9.7   | 4  | 1 |
| -1.7E+18 | IsMasterProtein | cRAP_P78386 | Keratin, type II cuticular Hb5 OS=Homo sapiens GN=KRT85 PE=1 SV=1                                                                  | 26 | 11 | 11 | 4 | 507  | 55.8  | 6.55 | 30.92 | 11 | 1 |
| -1.5E+18 | IsMasterProtein | A0A8C4ZPV4  | Moesin-like OS=Gadus morhua OX=8049 GN=MSN PE=4 SV=1                                                                               | 15 | 10 | 11 | 4 | 563  | 66    | 5.76 | 28.91 | 10 | 1 |
| -1.5E+18 | IsMasterProtein | A0A8C4ZRP3  | Ubiquitin protein ligase E3 component n-recogin 5 OS=Gadus morhua OX=8049 GN=UBR5 PE=4 SV=1                                        | 3  | 4  | 6  | 4 | 2777 | 305.9 | 6.1  | 16.46 | 4  | 1 |
| -1.4E+18 | IsMasterProtein | A0A8C4Z8A9  | SH3 domain containing 21 OS=Gadus morhua OX=8049 GN=sh3d21 PE=4 SV=1                                                               | 17 | 4  | 4  | 4 | 470  | 52.3  | 7.83 | 10.75 | 4  | 1 |
| -1.4E+18 | IsMasterProtein | A0A8C4ZYM2  | Methylcytosine dioxygenase TET OS=Gadus morhua OX=8049 GN=tet1 PE=3 SV=1                                                           | 3  | 4  | 4  | 4 | 2342 | 253.8 | 7.75 | 9.32  | 4  | 1 |
| -1.3E+18 | IsMasterProtein | A0A8C5C818  | WD repeat domain 7 OS=Gadus morhua OX=8049 GN=WDR7 PE=4 SV=1                                                                       | 4  | 4  | 6  | 4 | 1353 | 148.9 | 6.84 | 13.68 | 4  | 1 |
| -1.3E+18 | IsMasterProtein | A0A8C5FJ16  | Ribonucleoprotein OS=Gadus morhua OX=8049 GN=snu13b PE=3 SV=1                                                                      | 38 | 4  | 5  | 4 | 130  | 14.3  | 8.46 | 13.54 | 4  | 1 |
| -1.1E+18 | IsMasterProtein | A0A8C5A2Q7  | N-acetylglucosamine-6-sulfatase OS=Gadus morhua OX=8049 PE=3 SV=1                                                                  | 14 | 5  | 6  | 4 | 523  | 58.2  | 6.47 | 18.3  | 5  | 1 |
| -8.3E+17 | IsMasterProtein | A0A8C5C4E0  | NLR family, CARD domain containing 3 OS=Gadus morhua OX=8049 GN=nlrc3 PE=4 SV=1                                                    | 8  | 4  | 4  | 4 | 1049 | 114.5 | 8.02 | 9.86  | 4  | 1 |
| -5.9E+17 | IsMasterProtein | cRAP_P01133 | Pro-epidermal growth factor OS=Homo sapiens GN=EGF PE=1 SV=2                                                                       | 6  | 4  | 4  | 4 | 1207 | 133.9 | 5.85 | 10.15 | 4  | 1 |
| -5.9E+17 | IsMasterProtein | A0A8C5BRA9  | MOB-like protein phocein OS=Gadus morhua OX=8049 GN=LOC115533190 PE=3 SV=1                                                         | 46 | 4  | 5  | 4 | 99   | 10.8  | 8.1  | 14.8  | 4  | 1 |
| -5.6E+17 | IsMasterProtein | A0A8C5CUS7  | Ubiquitinyl hydrolase 1 OS=Gadus morhua OX=8049 GN=otud7a PE=4 SV=1                                                                | 8  | 4  | 4  | 4 | 958  | 105.9 | 7.81 | 9.95  | 4  | 1 |
| -3.4E+17 | IsMasterProtein | A0A8C4Z398  | Peptidase S1 domain-containing protein OS=Gadus morhua OX=8049 PE=4 SV=1                                                           | 15 | 4  | 4  | 4 | 286  | 31.2  | 7.87 | 11.9  | 4  | 1 |
| -1.7E+17 | IsMasterProtein | A0A8C5A4M7  | Apoptotic chromatin condensation inducer 1a OS=Gadus morhua OX=8049 GN=acin1a PE=4 SV=1                                            | 5  | 4  | 4  | 4 | 1719 | 193.1 | 7.12 | 9.99  | 4  | 1 |
| -1.1E+17 | IsMasterProtein | A0A8C5BB52  | Myosin X, like 3 OS=Gadus morhua OX=8049 GN=myo10l3 PE=3 SV=1                                                                      | 5  | 4  | 4  | 4 | 2140 | 245.7 | 6.39 | 10.89 | 4  | 1 |
| -5.6E+16 | IsMasterProtein | A0A8C5FBE7  | Mucin-12-like OS=Gadus morhua OX=8049 GN=LOC115551004 PE=4 SV=1                                                                    | 3  | 4  | 4  | 4 | 2040 | 222.3 | 9.72 | 10.26 | 4  | 1 |

|          |                 |             |                                                                                                     |    |    |    |   |      |       |      |        |    |   |
|----------|-----------------|-------------|-----------------------------------------------------------------------------------------------------|----|----|----|---|------|-------|------|--------|----|---|
| -3.1E+16 | IsMasterProtein | A0A8C4YZF6  | Uncharacterized protein OS=Gadus morhua OX=8049 PE=3 SV=1                                           | 12 | 4  | 4  | 4 | 620  | 70.5  | 6.73 | 10.68  | 4  | 1 |
| 3.79E+16 | IsMasterProtein | A0A8C5D2U2  | Transport and golgi organization 6 homolog (Drosophila) OS=Gadus morhua OX=8049 PE=3 SV=1           | 3  | 4  | 4  | 4 | 1363 | 147.8 | 7.69 | 10.73  | 4  | 1 |
| 1.6E+17  | IsMasterProtein | A0A8C4ZPJ9  | Keratin, type I cytoskeletal 13-like OS=Gadus morhua OX=8049 GN=LOC115534848 PE=4 SV=1              | 21 | 9  | 11 | 4 | 438  | 47.4  | 4.98 | 28.4   | 9  | 1 |
| 1.61E+17 | IsMasterProtein | A0A8C5AZ29  | Tubulin alpha chain OS=Gadus morhua OX=8049 GN=LOC115559022 PE=3 SV=1                               | 41 | 18 | 55 | 4 | 574  | 63.6  | 5.24 | 175.81 | 18 | 1 |
| 1.87E+17 | IsMasterProtein | A0A8C5FCF4  | Mannosyl-glycoprotein endo-beta-N-acetylglucosaminidase OS=Gadus morhua OX=8049 GN=engase PE=3 SV=1 | 13 | 4  | 5  | 4 | 731  | 80.6  | 5.45 | 10.58  | 4  | 1 |
| 2.29E+17 | IsMasterProtein | A0A8C4ZX27  | Microtubule-associated protein OS=Gadus morhua OX=8049 PE=4 SV=1                                    | 3  | 4  | 4  | 4 | 1551 | 162.3 | 5.57 | 9.73   | 4  | 1 |
| 3.36E+17 | IsMasterProtein | A0A8C5BVT3  | Creatine kinase OS=Gadus morhua OX=8049 PE=3 SV=1                                                   | 10 | 4  | 5  | 4 | 423  | 48    | 8.69 | 13.59  | 4  | 1 |
| 3.66E+17 | IsMasterProtein | A0A8C5FRB2  | Ankyrin repeat domain 11 OS=Gadus morhua OX=8049 GN=ankrd11 PE=4 SV=1                               | 3  | 5  | 7  | 4 | 2859 | 322.8 | 6.28 | 14.19  | 5  | 1 |
| 4.69E+17 | IsMasterProtein | A0A8C5B1J7  | Hyaluronoglucosaminidase OS=Gadus morhua OX=8049 GN=prkar2aa PE=3 SV=1                              | 9  | 4  | 4  | 4 | 804  | 90.4  | 7.55 | 11.88  | 4  | 1 |
| 5.48E+17 | IsMasterProtein | A0A8C5BH78  | Cytidine deaminase OS=Gadus morhua OX=8049 GN=cdab PE=3 SV=1                                        | 45 | 4  | 5  | 4 | 164  | 17.9  | 6.01 | 17.57  | 4  | 1 |
| 8.36E+17 | IsMasterProtein | A0A8C5B0E3  | Uncharacterized protein OS=Gadus morhua OX=8049 PE=3 SV=1                                           | 3  | 5  | 5  | 4 | 3906 | 433.5 | 5.2  | 13.9   | 5  | 1 |
| 8.38E+17 | IsMasterProtein | A0A8C5A4T9  | Glutamate dehydrogenase OS=Gadus morhua OX=8049 GN=glud1b PE=3 SV=1                                 | 21 | 7  | 7  | 4 | 514  | 56.7  | 8.41 | 19.24  | 7  | 1 |
| 9.75E+17 | IsMasterProtein | A0A8C4ZKX9  | Carbonic anhydrase OS=Gadus morhua OX=8049 PE=3 SV=1                                                | 23 | 4  | 5  | 4 | 262  | 29.2  | 7.85 | 16.61  | 4  | 1 |
| 1.11E+18 | IsMasterProtein | A0A8C4ZD29  | Uncharacterized protein OS=Gadus morhua OX=8049 PE=4 SV=1                                           | 8  | 4  | 5  | 4 | 1072 | 118.7 | 5.53 | 13.88  | 4  | 1 |
| 1.14E+18 | IsMasterProtein | A0A8C4ZEQ1  | Non-specific serine/threonine protein kinase OS=Gadus morhua OX=8049 GN=smg1 PE=3 SV=1              | 3  | 4  | 5  | 4 | 3575 | 393.4 | 6.35 | 11.11  | 4  | 1 |
| 1.19E+18 | IsMasterProtein | A0A8C5C9C1  | Dynein, axonemal, heavy chain 5 OS=Gadus morhua OX=8049 PE=3 SV=1                                   | 2  | 5  | 5  | 4 | 4190 | 478.7 | 6.89 | 13.14  | 5  | 1 |
| 1.27E+18 | IsMasterProtein | A0A8C5BQU6  | Nuclear receptor coactivator 3 OS=Gadus morhua OX=8049 PE=3 SV=1                                    | 5  | 4  | 4  | 4 | 1582 | 167.8 | 8.28 | 8.8    | 4  | 1 |
| 1.48E+18 | IsMasterProtein | A0A8C5BYX4  | Msx2-interacting protein-like OS=Gadus morhua OX=8049 GN=SPEN PE=3 SV=1                             | 2  | 4  | 4  | 4 | 3248 | 359.5 | 7.11 | 10.27  | 4  | 1 |
| 1.59E+18 | IsMasterProtein | A0A8C5B4S2  | Uncharacterized protein OS=Gadus morhua OX=8049 PE=4 SV=1                                           | 6  | 4  | 4  | 4 | 2051 | 226.5 | 6    | 10.16  | 4  | 1 |
| 1.79E+18 | IsMasterProtein | A0A8C5AHA9  | FAT atypical cadherin 1a OS=Gadus morhua OX=8049 GN=fat1a PE=4 SV=1                                 | 2  | 4  | 4  | 4 | 4652 | 509.4 | 4.92 | 9.24   | 4  | 1 |
| 1.84E+18 | IsMasterProtein | A0A8C5BYC4  | Isocitrate dehydrogenase [NAD] subunit, mitochondrial OS=Gadus morhua OX=8049 PE=3 SV=1             | 22 | 4  | 5  | 4 | 390  | 42.5  | 8.5  | 18.93  | 4  | 1 |
| 2.02E+18 | IsMasterProtein | A0A8C5AY58  | Vitellogenin-2-like OS=Gadus morhua OX=8049 GN=LOC115556237 PE=4 SV=1                               | 12 | 15 | 20 | 4 | 1626 | 177   | 8.97 | 56.64  | 15 | 1 |
| 2.05E+18 | IsMasterProtein | A0A8C5F5L5  | DEP domain-containing protein OS=Gadus morhua OX=8049 PE=4 SV=1                                     | 8  | 4  | 4  | 4 | 1321 | 146.9 | 7.14 | 11.1   | 4  | 1 |
| 2.21E+18 | IsMasterProtein | A0A8C4Z3X3  | Tubulin beta chain OS=Gadus morhua OX=8049 GN=tubb2b PE=3 SV=1                                      | 55 | 25 | 73 | 4 | 445  | 49.7  | 4.89 | 229.7  | 25 | 1 |
| 2.34E+18 | IsMasterProtein | A0A8C5FL72  | Uncharacterized protein OS=Gadus morhua OX=8049 PE=4 SV=1                                           | 15 | 4  | 5  | 4 | 278  | 30.3  | 8.09 | 16.04  | 4  | 1 |
| 2.4E+18  | IsMasterProtein | A0A8C4ZGR6  | Collagen, type XI, alpha 1b OS=Gadus morhua OX=8049 PE=4 SV=1                                       | 10 | 5  | 6  | 4 | 1218 | 127.3 | 5.2  | 15.45  | 5  | 1 |
| 2.42E+18 | IsMasterProtein | A0A8C4YVN8  | Uncharacterized protein OS=Gadus morhua OX=8049 PE=4 SV=1                                           | 5  | 5  | 5  | 4 | 1261 | 124.7 | 7.96 | 13.34  | 5  | 1 |
| 2.51E+18 | IsMasterProtein | A0A8C5AKT2  | Uncharacterized protein OS=Gadus morhua OX=8049 PE=4 SV=1                                           | 5  | 4  | 4  | 4 | 1241 | 141.2 | 6.28 | 9.08   | 4  | 1 |
| 2.66E+18 | IsMasterProtein | A0A8C4Z4F2  | Exosome component 10 OS=Gadus morhua OX=8049 GN=EXOSC10 PE=4 SV=1                                   | 7  | 4  | 4  | 4 | 898  | 102.3 | 7.74 | 8.92   | 4  | 1 |
| 2.73E+18 | IsMasterProtein | A0A8C4ZM26  | Alpha-carbonic anhydrase domain-containing protein OS=Gadus morhua OX=8049 PE=3 SV=1                | 24 | 4  | 10 | 4 | 247  | 27.3  | 8.02 | 30.97  | 4  | 1 |
| 2.8E+18  | IsMasterProtein | A0A8C5BC94  | Voltage-dependent anion-selective channel protein 3 OS=Gadus morhua OX=8049 GN=vdac3 PE=3 SV=1      | 14 | 4  | 4  | 4 | 297  | 31.8  | 8.91 | 11.98  | 4  | 1 |
| 2.87E+18 | IsMasterProtein | cRAP_P12081 | Histidine--tRNA ligase, cytoplasmic OS=Homo sapiens GN=HARS PE=1 SV=2                               | 8  | 4  | 6  | 4 | 509  | 57.4  | 5.88 | 13.36  | 4  | 1 |
| 2.97E+18 | IsMasterProtein | A0A8C5A0K6  | Semaphorin 7A OS=Gadus morhua OX=8049 PE=4 SV=1                                                     | 24 | 6  | 6  | 4 | 382  | 43.8  | 5.88 | 16.94  | 6  | 1 |
| 3.19E+18 | IsMasterProtein | A0A8C5B5G7  | Inter-alpha-trypsin inhibitor heavy chain 2 OS=Gadus morhua OX=8049 PE=3 SV=1                       | 6  | 4  | 4  | 4 | 902  | 100.9 | 6.67 | 11.72  | 4  | 1 |
| 3.28E+18 | IsMasterProtein | A0A8C5FC39  | Purine-rich element binding protein Aa OS=Gadus morhua OX=8049 GN=puraa PE=3 SV=1                   | 38 | 7  | 8  | 4 | 284  | 31.8  | 6.95 | 24.24  | 7  | 1 |
| 3.58E+18 | IsMasterProtein | A0A8C4ZNA0  | Adhesion G protein-coupled receptor V1 OS=Gadus morhua OX=8049 PE=4 SV=1                            | 2  | 4  | 4  | 4 | 5730 | 610.3 | 4.61 | 11.21  | 4  | 1 |

|          |                 |            |                                                                                                             |    |    |    |   |      |       |       |       |    |   |
|----------|-----------------|------------|-------------------------------------------------------------------------------------------------------------|----|----|----|---|------|-------|-------|-------|----|---|
| 3.74E+18 | IsMasterProtein | A0A8C4ZJ74 | Splicing factor, arginine/serine-rich 1 OS=Gadus morhua OX=8049 GN=LOC115547035 PE=3 SV=1                   | 28 | 5  | 5  | 4 | 239  | 26.7  | 9.98  | 11.99 | 5  | 1 |
| 3.8E+18  | IsMasterProtein | A0A8C5C3W2 | [Histone H3]-lysine(4) N-methyltransferase OS=Gadus morhua OX=8049 GN=KMT2C PE=4 SV=1                       | 1  | 4  | 4  | 4 | 6625 | 708.1 | 6.47  | 11.05 | 4  | 1 |
| 3.86E+18 | IsMasterProtein | A0A8C4ZAC6 | Ribosome binding protein 1b OS=Gadus morhua OX=8049 PE=4 SV=1                                               | 7  | 4  | 4  | 4 | 870  | 96.8  | 4.82  | 10.48 | 4  | 1 |
| 3.91E+18 | IsMasterProtein | A0A8C5B1A4 | Splicing factor, arginine/serine-rich 1 OS=Gadus morhua OX=8049 GN=srsf1a PE=3 SV=1                         | 27 | 6  | 7  | 4 | 273  | 29.4  | 10.35 | 18.08 | 6  | 1 |
| 3.96E+18 | IsMasterProtein | A0A8C5A6E0 | Nascent polypeptide associated complex subunit alpha OS=Gadus morhua OX=8049 GN=naca PE=4 SV=1              | 12 | 4  | 4  | 4 | 554  | 58.1  | 5.64  | 13.69 | 4  | 1 |
| 4.02E+18 | IsMasterProtein | A0A8C5FSR6 | Tubulin alpha chain OS=Gadus morhua OX=8049 GN=LOC115533128 PE=3 SV=1                                       | 47 | 19 | 54 | 4 | 445  | 49.8  | 5.16  | 172   | 19 | 1 |
| 4.04E+18 | IsMasterProtein | A0A8C4Z4U8 | Ribosomal protein L7 OS=Gadus morhua OX=8049 GN=RPL7 PE=3 SV=1                                              | 21 | 4  | 4  | 4 | 245  | 28.6  | 10.99 | 13.96 | 4  | 1 |
| 4.39E+18 | IsMasterProtein | A0A8C4ZFI5 | Cytosolic non-specific dipeptidase-like OS=Gadus morhua OX=8049 GN=LOC115536314 PE=3 SV=1                   | 9  | 4  | 4  | 4 | 474  | 53.1  | 5.67  | 11.24 | 4  | 1 |
| 4.41E+18 | IsMasterProtein | A0A8C5A2X5 | Nebulin OS=Gadus morhua OX=8049 PE=4 SV=1                                                                   | 1  | 4  | 4  | 4 | 5433 | 622.1 | 9.36  | 9.81  | 4  | 1 |
| 4.46E+18 | IsMasterProtein | A0A8C5BXD5 | Transmembrane protein 200A OS=Gadus morhua OX=8049 GN=tmem200a PE=3 SV=1                                    | 10 | 4  | 4  | 4 | 589  | 62.2  | 9.85  | 9.79  | 4  | 1 |
| 4.65E+18 | IsMasterProtein | A0A8C5F650 | Signal-induced proliferation-associated 1 like 3 OS=Gadus morhua OX=8049 GN=sipa1l3 PE=4 SV=1               | 4  | 4  | 6  | 4 | 1734 | 186.8 | 8.32  | 14.82 | 4  | 1 |
| 4.71E+18 | IsMasterProtein | A0A8C5F6H7 | Dynein, axonemal, heavy chain 1 OS=Gadus morhua OX=8049 PE=3 SV=1                                           | 2  | 4  | 4  | 4 | 4170 | 470.3 | 6.04  | 10.91 | 4  | 1 |
| 4.77E+18 | IsMasterProtein | A0A8C4Z087 | Parvalbumin OS=Gadus morhua OX=8049 PE=3 SV=1                                                               | 34 | 7  | 8  | 4 | 212  | 22.3  | 4.75  | 21.56 | 7  | 1 |
| 4.93E+18 | IsMasterProtein | A0A8C5CS14 | Uveal autoantigen with coiled-coil domains and ankyrin repeats b OS=Gadus morhua OX=8049 GN=uacab PE=4 SV=1 | 6  | 4  | 4  | 4 | 1342 | 151.1 | 5.92  | 11.44 | 4  | 1 |
| 5.13E+18 | IsMasterProtein | A0A8C5CDC4 | Glutamate receptor OS=Gadus morhua OX=8049 PE=3 SV=1                                                        | 5  | 4  | 4  | 4 | 1758 | 192.1 | 9.32  | 10.74 | 4  | 1 |
| 5.14E+18 | IsMasterProtein | A0A8C4ZWS6 | Heparanase OS=Gadus morhua OX=8049 GN=hpse PE=3 SV=1                                                        | 15 | 4  | 5  | 4 | 554  | 61.8  | 6.9   | 18.81 | 4  | 1 |
| 5.17E+18 | IsMasterProtein | A0A8C4ZYS7 | Procollagen-lysine 5-dioxygenase OS=Gadus morhua OX=8049 GN=PLOD1 PE=4 SV=1                                 | 10 | 4  | 4  | 4 | 749  | 85.7  | 6.58  | 11.03 | 4  | 1 |
| 5.3E+18  | IsMasterProtein | A0A8C5A8B0 | KH domain-containing protein OS=Gadus morhua OX=8049 PE=4 SV=1                                              | 3  | 4  | 4  | 4 | 2255 | 236.9 | 6.18  | 10.39 | 4  | 1 |
| 5.3E+18  | IsMasterProtein | A0A8C5BL54 | A kinase (PRKA) anchor protein 11 OS=Gadus morhua OX=8049 GN=akap11 PE=4 SV=1                               | 4  | 4  | 4  | 4 | 1843 | 199.6 | 5.44  | 10.24 | 4  | 1 |
| 5.36E+18 | IsMasterProtein | A0A8C4ZN24 | Drebrin-like b OS=Gadus morhua OX=8049 PE=3 SV=1                                                            | 16 | 4  | 4  | 4 | 448  | 50.5  | 4.72  | 11.36 | 4  | 1 |
| 5.8E+18  | IsMasterProtein | A0A8C5D4H1 | Chromatin-remodeling ATPase INO80 OS=Gadus morhua OX=8049 GN=ino80 PE=3 SV=1                                | 5  | 4  | 4  | 4 | 1420 | 161.9 | 9.26  | 10.68 | 4  | 1 |
| 5.85E+18 | IsMasterProtein | A0A8C5AYA2 | Kinesin family member 1B OS=Gadus morhua OX=8049 PE=3 SV=1                                                  | 7  | 6  | 6  | 4 | 1715 | 192.5 | 6.43  | 15.78 | 6  | 1 |
| 6.11E+18 | IsMasterProtein | A0A8C5BQ2  | Cystatin-like OS=Gadus morhua OX=8049 GN=LOC115559797 PE=4 SV=1                                             | 37 | 4  | 4  | 4 | 134  | 14.5  | 8.72  | 11.62 | 4  | 1 |
| 6.16E+18 | IsMasterProtein | A0A8C5C5Y8 | Uncharacterized protein OS=Gadus morhua OX=8049 PE=3 SV=1                                                   | 5  | 4  | 4  | 4 | 1948 | 220.3 | 7.15  | 11.02 | 4  | 1 |
| 6.23E+18 | IsMasterProtein | A0A8C5F6P1 | 60S ribosomal protein L34 OS=Gadus morhua OX=8049 GN=RPL34 PE=3 SV=1                                        | 28 | 4  | 4  | 4 | 117  | 13.3  | 11.47 | 9.85  | 4  | 1 |
| 6.53E+18 | IsMasterProtein | A0A8C5BW43 | EMAP like 3 OS=Gadus morhua OX=8049 GN=eml3 PE=3 SV=1                                                       | 8  | 4  | 4  | 4 | 797  | 87.1  | 7.5   | 10.3  | 4  | 1 |
| 6.58E+18 | IsMasterProtein | A0A8C5FNL2 | Eukaryotic translation initiation factor 4H OS=Gadus morhua OX=8049 PE=4 SV=1                               | 29 | 4  | 4  | 4 | 210  | 23.1  | 9.63  | 10.18 | 4  | 1 |
| 6.69E+18 | IsMasterProtein | A0A8C4ZDI5 | Uncharacterized protein OS=Gadus morhua OX=8049 PE=3 SV=1                                                   | 24 | 4  | 4  | 4 | 192  | 21.4  | 6.52  | 10.54 | 4  | 1 |
| 7.12E+18 | IsMasterProtein | A0A8C5AHB1 | Homeodomain interacting protein kinase 3b OS=Gadus morhua OX=8049 PE=4 SV=1                                 | 7  | 4  | 4  | 4 | 1383 | 148.3 | 8.56  | 11.37 | 4  | 1 |
| 7.24E+18 | IsMasterProtein | A0A8C5CP04 | Leukocyte cell-derived chemotaxin 2 like OS=Gadus morhua OX=8049 GN=lect2l PE=3 SV=1                        | 39 | 4  | 4  | 4 | 138  | 15    | 9.04  | 11.95 | 4  | 1 |
| 7.27E+18 | IsMasterProtein | A0A8C5ANM9 | RHD domain-containing protein OS=Gadus morhua OX=8049 PE=4 SV=1                                             | 5  | 4  | 4  | 4 | 1501 | 161.1 | 7.24  | 11.17 | 4  | 1 |
| 7.34E+18 | IsMasterProtein | A0A8C5BPZ8 | Uncharacterized protein OS=Gadus morhua OX=8049 PE=4 SV=1                                                   | 5  | 4  | 4  | 4 | 1011 | 112.5 | 7.27  | 9.3   | 4  | 1 |
| 7.57E+18 | IsMasterProtein | A0A8C5BT17 | Cysteine desulfurase, mitochondrial OS=Gadus morhua OX=8049 GN=nfs1 PE=3 SV=1                               | 14 | 4  | 4  | 4 | 447  | 49.2  | 7.25  | 12.71 | 4  | 1 |
| 7.95E+18 | IsMasterProtein | A0A8C5FWS0 | Coagulation factor IX OS=Gadus morhua OX=8049 GN=f9b PE=4 SV=1                                              | 8  | 4  | 4  | 4 | 553  | 60.4  | 5.27  | 10.86 | 4  | 1 |
| 8.22E+18 | IsMasterProtein | A0A8C5CM24 | PTPRF interacting protein alpha 2 OS=Gadus morhua OX=8049 PE=3 SV=1                                         | 6  | 4  | 4  | 4 | 1232 | 140.4 | 6.23  | 11.26 | 4  | 1 |
| 8.23E+18 | IsMasterProtein | A0A8C4Z8Q5 | Non-specific serine/threonine protein kinase OS=Gadus morhua OX=8049 PE=3 SV=1                              | 3  | 4  | 6  | 4 | 2876 | 324.6 | 6.24  | 14.26 | 4  | 1 |



|                 |                 |            |                                                                                                                                                            |    |    |    |   |      |       |       |       |    |   |
|-----------------|-----------------|------------|------------------------------------------------------------------------------------------------------------------------------------------------------------|----|----|----|---|------|-------|-------|-------|----|---|
| <b>8.24E+18</b> | IsMasterProtein | A0A8C4ZL58 | Kazal-like domain-containing protein OS=Gadus morhua OX=8049 PE=3 SV=1                                                                                     | 5  | 4  | 4  | 4 | 1875 | 207.9 | 8.02  | 10.38 | 4  | 1 |
| <b>8.62E+18</b> | IsMasterProtein | A0A8C5FCP0 | Charged multivesicular body protein 4b-like OS=Gadus morhua OX=8049 GN=LOC115557320 PE=3 SV=1                                                              | 8  | 5  | 6  | 4 | 604  | 66.9  | 5.52  | 16.16 | 5  | 1 |
| <b>-9.2E+18</b> | IsMasterProtein | A0A8C5CMG7 | Cadherin-6-like OS=Gadus morhua OX=8049 GN=CDH6 PE=4 SV=1                                                                                                  | 7  | 3  | 3  | 3 | 807  | 89.4  | 5.19  | 8.18  | 3  | 1 |
| <b>-9.2E+18</b> | IsMasterProtein | A0A8C5BB08 | Solute carrier family 2 member 4 OS=Gadus morhua OX=8049 GN=SLC2A4 PE=3 SV=1                                                                               | 13 | 3  | 3  | 3 | 492  | 53.6  | 7.61  | 8.23  | 3  | 1 |
| <b>-9.2E+18</b> | IsMasterProtein | A0A8C5AID0 | Angiotensin-converting enzyme OS=Gadus morhua OX=8049 GN=ace PE=3 SV=1                                                                                     | 4  | 3  | 3  | 3 | 1259 | 144.2 | 6.24  | 9.46  | 3  | 1 |
| <b>-9.1E+18</b> | IsMasterProtein | A0A8C5BPF9 | Arrestin domain containing 1b OS=Gadus morhua OX=8049 GN=arrdc1b PE=3 SV=1                                                                                 | 9  | 3  | 4  | 3 | 430  | 46.1  | 7.18  | 11.94 | 3  | 1 |
| <b>-9.1E+18</b> | IsMasterProtein | Q37741     | Cytochrome c oxidase subunit 2 OS=Gadus morhua OX=8049 GN=mt-co2 PE=3 SV=1                                                                                 | 20 | 3  | 6  | 3 | 230  | 26    | 4.79  | 20.23 | 3  | 1 |
| <b>-9.1E+18</b> | IsMasterProtein | A0A8C5BR64 | Gelsolin OS=Gadus morhua OX=8049 PE=4 SV=1                                                                                                                 | 7  | 3  | 3  | 3 | 710  | 78.6  | 5.68  | 7.44  | 3  | 1 |
| <b>-9.1E+18</b> | IsMasterProtein | A0A8C5BGX1 | Myosin heavy chain, fast skeletal muscle-like OS=Gadus morhua OX=8049 GN=LOC115542544 PE=3 SV=1                                                            | 6  | 9  | 9  | 3 | 1936 | 220.8 | 5.62  | 21.21 | 9  | 1 |
| <b>-9.1E+18</b> | IsMasterProtein | A0A8C5BSQ7 | Kelch-like family member 6 OS=Gadus morhua OX=8049 GN=klhl6 PE=4 SV=1                                                                                      | 14 | 3  | 5  | 3 | 614  | 67.6  | 6.04  | 16.66 | 3  | 1 |
| <b>-9.1E+18</b> | IsMasterProtein | A0A8C5CCX9 | Serine protease 33-like OS=Gadus morhua OX=8049 GN=LOC115531199 PE=4 SV=1                                                                                  | 12 | 3  | 3  | 3 | 310  | 33.4  | 6.2   | 8.1   | 3  | 1 |
| <b>-9.1E+18</b> | IsMasterProtein | A0A8C5AUL3 | Hemopexin-like OS=Gadus morhua OX=8049 GN=LOC115542094 PE=4 SV=1                                                                                           | 23 | 7  | 10 | 3 | 447  | 49.6  | 6.13  | 36.28 | 7  | 1 |
| <b>-9E+18</b>   | IsMasterProtein | A0A8C4ZKV9 | Dihydrolipoyllysine-residue succinyltransferase component of 2-oxoglutarate dehydrogenase complex, mitochondrial OS=Gadus morhua OX=8049 GN=dlst PE=3 SV=1 | 6  | 3  | 3  | 3 | 456  | 48.9  | 8.88  | 6.85  | 3  | 1 |
| <b>-9E+18</b>   | IsMasterProtein | A0A8C5FH26 | Succinate--CoA ligase [ADP/GDP-forming] subunit alpha, mitochondrial OS=Gadus morhua OX=8049 GN=suclg1 PE=3 SV=1                                           | 4  | 3  | 4  | 3 | 860  | 90.6  | 8.29  | 10.25 | 3  | 1 |
| <b>-9E+18</b>   | IsMasterProtein | A0A8C4ZBA1 | Uncharacterized protein OS=Gadus morhua OX=8049 PE=4 SV=1                                                                                                  | 6  | 3  | 3  | 3 | 640  | 69.1  | 9.29  | 7.44  | 3  | 1 |
| <b>-9E+18</b>   | IsMasterProtein | A0A8C4ZT27 | RNA binding motif protein 15 OS=Gadus morhua OX=8049 PE=3 SV=1                                                                                             | 5  | 3  | 3  | 3 | 795  | 87.1  | 9.83  | 7.01  | 3  | 1 |
| <b>-9E+18</b>   | IsMasterProtein | A0A8C4Z1D3 | Zinc finger C3H1-type containing OS=Gadus morhua OX=8049 GN=zfc3h1 PE=4 SV=1                                                                               | 3  | 3  | 3  | 3 | 2169 | 241.3 | 7.4   | 7.05  | 3  | 1 |
| <b>-9E+18</b>   | IsMasterProtein | A0A8C4ZYA1 | Uncharacterized protein OS=Gadus morhua OX=8049 PE=4 SV=1                                                                                                  | 11 | 4  | 4  | 3 | 577  | 65.6  | 5.72  | 9.91  | 4  | 1 |
| <b>-8.9E+18</b> | IsMasterProtein | A0A8C5CQP1 | Superoxide dismutase [Mn], mitochondrial OS=Gadus morhua OX=8049 PE=3 SV=1                                                                                 | 19 | 3  | 3  | 3 | 261  | 28.8  | 9.11  | 10.13 | 3  | 1 |
| <b>-8.9E+18</b> | IsMasterProtein | A0A8C5BUY8 | Calcium-transporting ATPase OS=Gadus morhua OX=8049 GN=atp2a3 PE=3 SV=1                                                                                    | 11 | 8  | 9  | 3 | 1000 | 109.7 | 5.58  | 24.99 | 8  | 1 |
| <b>-8.9E+18</b> | IsMasterProtein | A0A8C5AA65 | Neuronal tyrosine phosphorylated phosphoinositide-3-kinase adaptor 1 OS=Gadus morhua OX=8049 GN=nyap1 PE=4 SV=1                                            | 6  | 3  | 3  | 3 | 1129 | 121.2 | 9.8   | 8.93  | 3  | 1 |
| <b>-8.8E+18</b> | IsMasterProtein | A0A8C5AAB6 | Coagulation factor VIII, procoagulant component OS=Gadus morhua OX=8049 GN=f8 PE=3 SV=1                                                                    | 5  | 3  | 4  | 3 | 1342 | 151   | 7.06  | 11.33 | 3  | 1 |
| <b>-8.8E+18</b> | IsMasterProtein | A0A8C5B2H2 | Peptidylprolyl isomerase G OS=Gadus morhua OX=8049 GN=PPIG PE=4 SV=1                                                                                       | 5  | 3  | 3  | 3 | 761  | 86.7  | 10.36 | 7.32  | 3  | 1 |
| <b>-8.8E+18</b> | IsMasterProtein | A0A8C5A5Q7 | Coiled-coil domain containing 18 OS=Gadus morhua OX=8049 PE=4 SV=1                                                                                         | 3  | 3  | 3  | 3 | 1354 | 150   | 5.64  | 6.88  | 3  | 1 |
| <b>-8.8E+18</b> | IsMasterProtein | A0A8C5AWI2 | Actin, alpha cardiac OS=Gadus morhua OX=8049 GN=LOC115544317 PE=3 SV=1                                                                                     | 34 | 11 | 18 | 3 | 377  | 41.9  | 5.39  | 47.1  | 11 | 1 |
| <b>-8.8E+18</b> | IsMasterProtein | A0A8C5F9R1 | Ral guanine nucleotide dissociation stimulator-like 1 OS=Gadus morhua OX=8049 GN=LOC115561811 PE=4 SV=1                                                    | 11 | 3  | 4  | 3 | 750  | 82.1  | 6.38  | 12.36 | 3  | 1 |
| <b>-8.8E+18</b> | IsMasterProtein | A0A8C5B2K4 | Cartilage acidic protein 1a OS=Gadus morhua OX=8049 GN=crtac1a PE=4 SV=1                                                                                   | 10 | 3  | 3  | 3 | 546  | 58.4  | 5.39  | 7.58  | 3  | 1 |
| <b>-8.8E+18</b> | IsMasterProtein | A0A8C4Z3S3 | Arrestin-C OS=Gadus morhua OX=8049 GN=arr3b PE=3 SV=1                                                                                                      | 16 | 3  | 3  | 3 | 339  | 36.6  | 6.28  | 7.86  | 3  | 1 |
| <b>-8.8E+18</b> | IsMasterProtein | A0A8C5BG83 | ZF-CXXC and PHD_FXL19 domain-containing protein OS=Gadus morhua OX=8049 GN=zgc:158376 PE=4 SV=1                                                            | 5  | 3  | 6  | 3 | 978  | 102.9 | 8.63  | 15.34 | 3  | 1 |
| <b>-8.8E+18</b> | IsMasterProtein | A0A8C5AB67 | Cysteine-rich secretory protein LCCL domain containing 2 OS=Gadus morhua OX=8049 GN=crispld2 PE=4 SV=1                                                     | 11 | 3  | 3  | 3 | 510  | 57    | 8.31  | 7.78  | 3  | 1 |
| <b>-8.7E+18</b> | IsMasterProtein | A0A8C5BTB2 | Acetyl-CoA carboxylase OS=Gadus morhua OX=8049 PE=4 SV=1                                                                                                   | 4  | 4  | 5  | 3 | 2302 | 258.4 | 6.48  | 12.9  | 4  | 1 |



|          |                 |            |                                                                                                             |    |   |   |   |      |       |      |       |   |   |
|----------|-----------------|------------|-------------------------------------------------------------------------------------------------------------|----|---|---|---|------|-------|------|-------|---|---|
| -8.7E+18 | IsMasterProtein | A0A8C5BDW9 | Dynein, axonemal, heavy chain 9 OS=Gadus morhua OX=8049 GN=dnah9 PE=3 SV=1                                  | 1  | 3 | 3 | 3 | 4365 | 495.7 | 5.55 | 6.63  | 3 | 1 |
| -8.7E+18 | IsMasterProtein | A0A8C5AZW4 | Phosphoglycerate kinase OS=Gadus morhua OX=8049 PE=3 SV=1                                                   | 7  | 3 | 4 | 3 | 515  | 55.2  | 8.98 | 12.83 | 3 | 1 |
| -8.7E+18 | IsMasterProtein | A0A8C4Z5A8 | Zinc finger protein 592 OS=Gadus morhua OX=8049 GN=znf592 PE=3 SV=1                                         | 4  | 3 | 3 | 3 | 1296 | 140.2 | 8.35 | 9     | 3 | 1 |
| -8.7E+18 | IsMasterProtein | A0A8C5CAF7 | Dynactin subunit 1 OS=Gadus morhua OX=8049 GN=LOC115529561 PE=3 SV=1                                        | 3  | 3 | 3 | 3 | 1426 | 157.7 | 6.21 | 6.76  | 3 | 1 |
| -8.7E+18 | IsMasterProtein | A0A8C5BLK4 | Rho/rac guanine nucleotide exchange factor (GEF) 2 OS=Gadus morhua OX=8049 GN=arhgef2 PE=4 SV=1             | 7  | 3 | 3 | 3 | 921  | 103.6 | 7.81 | 7.7   | 3 | 1 |
| -8.6E+18 | IsMasterProtein | A0A8C5CA43 | GTP-binding protein 1 OS=Gadus morhua OX=8049 GN=gtpbp11 PE=4 SV=1                                          | 10 | 3 | 4 | 3 | 674  | 73.5  | 8.27 | 8.64  | 3 | 1 |
| -8.6E+18 | IsMasterProtein | A0A8C4Z775 | Follistatin-like 1b OS=Gadus morhua OX=8049 PE=4 SV=1                                                       | 12 | 3 | 3 | 3 | 310  | 34.5  | 5.01 | 8.05  | 3 | 1 |
| -8.6E+18 | IsMasterProtein | A0A8C5D2R8 | Serpin peptidase inhibitor, clade B (ovalbumin), member 1, like 3 OS=Gadus morhua OX=8049 PE=3 SV=1         | 10 | 3 | 3 | 3 | 390  | 44.1  | 5.43 | 8.76  | 3 | 1 |
| -8.6E+18 | IsMasterProtein | A0A8C4YXD3 | Cytochrome c oxidase subunit 5A, mitochondrial OS=Gadus morhua OX=8049 GN=chchd3b PE=3 SV=1                 | 20 | 3 | 3 | 3 | 129  | 14.4  | 5.55 | 7.66  | 3 | 1 |
| -8.6E+18 | IsMasterProtein | A0A8C4Z1P3 | Retinitis pigmentosa GTPase regulator b OS=Gadus morhua OX=8049 GN=rpgrb PE=4 SV=1                          | 2  | 3 | 3 | 3 | 1436 | 157.2 | 4.25 | 6.79  | 3 | 1 |
| -8.6E+18 | IsMasterProtein | A0A8C5BJJ2 | Dedicator of cytokinesis 11 OS=Gadus morhua OX=8049 PE=3 SV=1                                               | 3  | 3 | 5 | 3 | 1875 | 213.7 | 8.12 | 12.05 | 3 | 1 |
| -8.6E+18 | IsMasterProtein | A0A8C5FI45 | DNA replication licensing factor MCM4 OS=Gadus morhua OX=8049 GN=mcm4 PE=3 SV=1                             | 7  | 3 | 3 | 3 | 821  | 92    | 6.98 | 8.1   | 3 | 1 |
| -8.5E+18 | IsMasterProtein | A0A8C5FQ81 | PAS domain-containing protein OS=Gadus morhua OX=8049 PE=4 SV=1                                             | 3  | 3 | 3 | 3 | 1518 | 163.1 | 6.73 | 6.73  | 3 | 1 |
| -8.5E+18 | IsMasterProtein | A0A8C5BK61 | Myosin XVIIIAb OS=Gadus morhua OX=8049 GN=myo18ab PE=3 SV=1                                                 | 4  | 4 | 4 | 3 | 2027 | 230   | 6.96 | 10.87 | 4 | 1 |
| -8.5E+18 | IsMasterProtein | A0A8C5F968 | Centrosomal protein 72 OS=Gadus morhua OX=8049 GN=cep72 PE=4 SV=1                                           | 5  | 3 | 3 | 3 | 569  | 64.8  | 8.7  | 7.57  | 3 | 1 |
| -8.5E+18 | IsMasterProtein | A0A8C5BHQ5 | Uncharacterized protein OS=Gadus morhua OX=8049 PE=3 SV=1                                                   | 13 | 3 | 3 | 3 | 519  | 58.7  | 7.61 | 8.75  | 3 | 1 |
| -8.5E+18 | IsMasterProtein | A0A8C5CSZ1 | Long-chain specific acyl-CoA dehydrogenase, mitochondrial OS=Gadus morhua OX=8049 GN=LOC115547731 PE=3 SV=1 | 8  | 3 | 4 | 3 | 403  | 44.8  | 5.99 | 9.82  | 3 | 1 |
| -8.4E+18 | IsMasterProtein | A0A8C4ZLJ9 | L-lactate dehydrogenase OS=Gadus morhua OX=8049 PE=3 SV=1                                                   | 12 | 4 | 4 | 3 | 335  | 36.8  | 8.09 | 9.81  | 4 | 1 |
| -8.4E+18 | IsMasterProtein | A0A8C4ZKC1 | FAM20C golgi associated secretory pathway kinase a OS=Gadus morhua OX=8049 GN=fam20ca PE=3 SV=1             | 7  | 4 | 4 | 3 | 583  | 66.9  | 8.63 | 11.51 | 4 | 1 |
| -8.4E+18 | IsMasterProtein | A0A8C5ASD7 | Succinate--CoA ligase [ADP-forming] subunit beta, mitochondrial OS=Gadus morhua OX=8049 GN=SUCLA2 PE=3 SV=1 | 6  | 3 | 3 | 3 | 465  | 50.6  | 5.69 | 7.4   | 3 | 1 |
| -8.4E+18 | IsMasterProtein | A0A8C5B1N6 | Collagen, type XI, alpha 2 OS=Gadus morhua OX=8049 PE=4 SV=1                                                | 4  | 3 | 5 | 3 | 1367 | 138.4 | 6.86 | 15.96 | 3 | 1 |
| -8.4E+18 | IsMasterProtein | A0A8C5B553 | RNA helicase OS=Gadus morhua OX=8049 GN=ddx39a PE=4 SV=1                                                    | 9  | 3 | 4 | 3 | 427  | 48.9  | 5.59 | 12.46 | 3 | 1 |
| -8.4E+18 | IsMasterProtein | A0A8C5BE21 | Kinesin motor domain-containing protein OS=Gadus morhua OX=8049 PE=3 SV=1                                   | 4  | 3 | 3 | 3 | 1030 | 117.8 | 6.83 | 9.36  | 3 | 1 |
| -8.3E+18 | IsMasterProtein | A0A8C5ARS1 | MFS domain-containing protein OS=Gadus morhua OX=8049 PE=3 SV=1                                             | 14 | 3 | 4 | 3 | 754  | 83.7  | 5.44 | 11.74 | 3 | 1 |
| -8.3E+18 | IsMasterProtein | A0A8C5B5P5 | V-type proton ATPase subunit a OS=Gadus morhua OX=8049 GN=ATP6V0A1 PE=3 SV=1                                | 4  | 3 | 3 | 3 | 831  | 94.8  | 7.71 | 8.03  | 3 | 1 |
| -8.3E+18 | IsMasterProtein | A0A8C5ATT1 | DNA helicase OS=Gadus morhua OX=8049 GN=chd4a PE=3 SV=1                                                     | 3  | 3 | 3 | 3 | 2148 | 244.1 | 5.99 | 7.82  | 3 | 1 |
| -8.3E+18 | IsMasterProtein | A0A8C5FBF0 | BCL9 transcription coactivator OS=Gadus morhua OX=8049 GN=bcl9 PE=3 SV=1                                    | 5  | 3 | 6 | 3 | 1515 | 155.7 | 8.65 | 16.73 | 3 | 1 |
| -8.3E+18 | IsMasterProtein | A0A8C5FKY6 | Ddb1 and cul4 associated factor 11 OS=Gadus morhua OX=8049 PE=4 SV=1                                        | 9  | 3 | 3 | 3 | 534  | 60    | 6.18 | 7.58  | 3 | 1 |
| -8.2E+18 | IsMasterProtein | A0A8C5AU63 | AP complex subunit beta OS=Gadus morhua OX=8049 PE=3 SV=1                                                   | 8  | 5 | 5 | 3 | 939  | 103   | 5.21 | 13.01 | 5 | 1 |
| -8.2E+18 | IsMasterProtein | A0A8C5B7P2 | Adaptor related protein complex 1 subunit gamma 2 OS=Gadus morhua OX=8049 GN=ap1g2 PE=4 SV=1                | 7  | 3 | 3 | 3 | 620  | 68.1  | 7.21 | 7.93  | 3 | 1 |
| -8.2E+18 | IsMasterProtein | A0A8C5BIL7 | Huntingtin interacting protein 1 related b OS=Gadus morhua OX=8049 GN=hip1rb PE=3 SV=1                      | 5  | 3 | 3 | 3 | 987  | 110.1 | 6.68 | 7.53  | 3 | 1 |
| -8.2E+18 | IsMasterProtein | A0A8C5BSX3 | RNA helicase OS=Gadus morhua OX=8049 GN=mov10 PE=3 SV=1                                                     | 4  | 3 | 3 | 3 | 903  | 101.9 | 8.25 | 6.95  | 3 | 1 |
| -8.2E+18 | IsMasterProtein | A0A8C4YWZ0 | FH2 domain containing 3 OS=Gadus morhua OX=8049 GN=fhdc3 PE=4 SV=1                                          | 7  | 3 | 4 | 3 | 858  | 93.3  | 6.55 | 9.73  | 3 | 1 |
| -8.2E+18 | IsMasterProtein | A0A8C5FNB5 | Glutamate receptor interacting protein 1 OS=Gadus morhua OX=8049 GN=grip1 PE=4 SV=1                         | 5  | 3 | 3 | 3 | 1115 | 119.6 | 6.01 | 7.26  | 3 | 1 |
| -8.2E+18 | IsMasterProtein | A0A8C5FJA2 | Cystatin fetuin-A-type domain-containing protein OS=Gadus morhua OX=8049 PE=4 SV=1                          | 12 | 3 | 3 | 3 | 347  | 36.4  | 4.82 | 10.62 | 3 | 1 |
| -8.2E+18 | IsMasterProtein | A0A8C5A8E2 | Golgi apparatus protein 1 OS=Gadus morhua OX=8049 PE=4 SV=1                                                 | 4  | 3 | 3 | 3 | 1100 | 126.1 | 7.42 | 8.14  | 3 | 1 |

|          |                 |            |                                                                                                                     |    |    |    |   |      |       |      |       |    |   |
|----------|-----------------|------------|---------------------------------------------------------------------------------------------------------------------|----|----|----|---|------|-------|------|-------|----|---|
| -8.1E+18 | IsMasterProtein | A0A8C4YVE2 | UV-stimulated scaffold protein A OS=Gadus morhua OX=8049 GN=uvssa PE=3 SV=1                                         | 7  | 3  | 3  | 3 | 772  | 87.8  | 5.97 | 8.23  | 3  | 1 |
| -8.1E+18 | IsMasterProtein | A0A8C4ZER5 | Glutamate dehydrogenase OS=Gadus morhua OX=8049 GN=LOC115559675 PE=3 SV=1                                           | 19 | 6  | 6  | 3 | 506  | 56.1  | 7.05 | 18.9  | 6  | 1 |
| -8.1E+18 | IsMasterProtein | A0A8C5ACM3 | Si:ch211-233a24.2 OS=Gadus morhua OX=8049 PE=4 SV=1                                                                 | 1  | 3  | 3  | 3 | 4960 | 548.1 | 6.43 | 8.39  | 3  | 1 |
| -8.1E+18 | IsMasterProtein | A0A8C4ZLF4 | Non-specific serine/threonine protein kinase OS=Gadus morhua OX=8049 GN=Irrk1 PE=4 SV=1                             | 3  | 3  | 3  | 3 | 1900 | 210.7 | 6.47 | 7.52  | 3  | 1 |
| -8.1E+18 | IsMasterProtein | A0A8C5FEW4 | Protein arginine methyltransferase 1 OS=Gadus morhua OX=8049 PE=4 SV=1                                              | 18 | 3  | 4  | 3 | 329  | 38    | 5.5  | 10.51 | 3  | 1 |
| -8E+18   | IsMasterProtein | A0A8C5CZP6 | Pentaxin OS=Gadus morhua OX=8049 PE=3 SV=1                                                                          | 12 | 3  | 4  | 3 | 216  | 24    | 4.94 | 9.51  | 3  | 1 |
| -8E+18   | IsMasterProtein | A0A8C5F733 | Non-specific serine/threonine protein kinase OS=Gadus morhua OX=8049 GN=trioa PE=3 SV=1                             | 2  | 3  | 3  | 3 | 3061 | 342.1 | 6.39 | 8.59  | 3  | 1 |
| -8E+18   | IsMasterProtein | A0A8C4YW02 | Propionyl-CoA carboxylase alpha chain, mitochondrial OS=Gadus morhua OX=8049 GN=pcca PE=4 SV=1                      | 6  | 3  | 3  | 3 | 712  | 77.6  | 6.21 | 7.69  | 3  | 1 |
| -8E+18   | IsMasterProtein | A0A8C5BR67 | Hyperpolarization activated cyclic nucleotide-gated potassium channel 2b OS=Gadus morhua OX=8049 GN=hcn2b PE=3 SV=1 | 5  | 3  | 3  | 3 | 964  | 107.4 | 8.57 | 7.21  | 3  | 1 |
| -8E+18   | IsMasterProtein | A0A8C4ZTT7 | Glutamate receptor OS=Gadus morhua OX=8049 GN=grin1a PE=3 SV=1                                                      | 6  | 3  | 3  | 3 | 944  | 106   | 8.75 | 7.57  | 3  | 1 |
| -8E+18   | IsMasterProtein | A0A8C5FDI3 | DENN domain containing 2B OS=Gadus morhua OX=8049 GN=dennd2b PE=4 SV=1                                              | 5  | 3  | 3  | 3 | 1149 | 127.1 | 9.28 | 7.7   | 3  | 1 |
| -8E+18   | IsMasterProtein | A0A8C4Z974 | Nucleoside diphosphate kinase OS=Gadus morhua OX=8049 PE=3 SV=1                                                     | 17 | 3  | 4  | 3 | 237  | 26.3  | 9.57 | 12.9  | 3  | 1 |
| -8E+18   | IsMasterProtein | A0A8C5BIS2 | WASH complex subunit 5 OS=Gadus morhua OX=8049 GN=washc5 PE=3 SV=1                                                  | 6  | 3  | 3  | 3 | 1131 | 130.7 | 6.95 | 8.6   | 3  | 1 |
| -8E+18   | IsMasterProtein | A0A8C4ZZ30 | Peptidylprolyl isomerase OS=Gadus morhua OX=8049 PE=4 SV=1                                                          | 22 | 3  | 3  | 3 | 116  | 12.7  | 9.07 | 8.58  | 3  | 1 |
| -7.9E+18 | IsMasterProtein | A0A8C4ZBE7 | Nucleobindin 2a OS=Gadus morhua OX=8049 GN=nucb2a PE=3 SV=1                                                         | 10 | 4  | 4  | 3 | 494  | 58.2  | 5.01 | 11.42 | 4  | 1 |
| -7.9E+18 | IsMasterProtein | A0A8C5F9L8 | UMP-CMP kinase OS=Gadus morhua OX=8049 GN=cmpk PE=3 SV=1                                                            | 23 | 3  | 3  | 3 | 219  | 24.9  | 7.37 | 10.03 | 3  | 1 |
| -7.9E+18 | IsMasterProtein | A0A8C4ZKU0 | Metalloproteinase inhibitor 2 OS=Gadus morhua OX=8049 GN=LOC115556743 PE=3 SV=1                                     | 14 | 3  | 3  | 3 | 220  | 24.6  | 5.17 | 8.43  | 3  | 1 |
| -7.9E+18 | IsMasterProtein | A0A8C5AXL8 | KAP NTPase domain-containing protein OS=Gadus morhua OX=8049 PE=4 SV=1                                              | 4  | 3  | 3  | 3 | 1641 | 179.9 | 5.99 | 8.48  | 3  | 1 |
| -7.9E+18 | IsMasterProtein | A0A8C5FJ76 | Uncharacterized protein OS=Gadus morhua OX=8049 PE=4 SV=1                                                           | 22 | 31 | 39 | 3 | 1651 | 181.1 | 8.57 | 119   | 31 | 1 |
| -7.8E+18 | IsMasterProtein | A0A8C5CWK8 | Hexokinase OS=Gadus morhua OX=8049 GN=hk2 PE=3 SV=1                                                                 | 3  | 3  | 4  | 3 | 919  | 101.7 | 5.94 | 9.24  | 3  | 1 |
| -7.8E+18 | IsMasterProtein | A0A8C5APL6 | Apoptosis inhibitor 5 OS=Gadus morhua OX=8049 GN=api5 PE=3 SV=1                                                     | 10 | 3  | 4  | 3 | 521  | 58.5  | 6.73 | 10.68 | 3  | 1 |
| -7.7E+18 | IsMasterProtein | A0A8C5AAZ7 | Uncharacterized protein OS=Gadus morhua OX=8049 PE=4 SV=1                                                           | 4  | 3  | 5  | 3 | 2306 | 250.8 | 6.73 | 13.6  | 3  | 1 |
| -7.7E+18 | IsMasterProtein | A0A8C5AEL5 | Formin homology 2 domain containing 1 OS=Gadus morhua OX=8049 GN=fhod1 PE=4 SV=1                                    | 6  | 3  | 3  | 3 | 1359 | 149.5 | 6.73 | 8.77  | 3  | 1 |
| -7.6E+18 | IsMasterProtein | A0A8C4Z2Q4 | Uridylate-specific endoribonuclease OS=Gadus morhua OX=8049 GN=endouc PE=3 SV=1                                     | 12 | 3  | 4  | 3 | 318  | 35.9  | 6.81 | 10.54 | 3  | 1 |
| -7.6E+18 | IsMasterProtein | A0A8C5CH10 | Signal recognition particle subunit SRP68 OS=Gadus morhua OX=8049 GN=srp68 PE=3 SV=1                                | 10 | 3  | 3  | 3 | 593  | 67.8  | 8.73 | 8.12  | 3  | 1 |
| -7.6E+18 | IsMasterProtein | A0A8C5C7D7 | Folate gamma-glutamyl hydrolase OS=Gadus morhua OX=8049 GN=LOC115537226 PE=3 SV=1                                   | 12 | 3  | 4  | 3 | 334  | 37.3  | 6.07 | 15.05 | 3  | 1 |
| -7.6E+18 | IsMasterProtein | A0A8C5AS02 | Interferon-induced GTP-binding protein Mx OS=Gadus morhua OX=8049 PE=3 SV=1                                         | 4  | 3  | 3  | 3 | 845  | 94.2  | 8.29 | 7.26  | 3  | 1 |
| -7.6E+18 | IsMasterProtein | A0A8C4ZNE3 | Arginine--tRNA ligase, cytoplasmic OS=Gadus morhua OX=8049 GN=rars1 PE=3 SV=1                                       | 5  | 3  | 4  | 3 | 660  | 74.7  | 7.08 | 9.95  | 3  | 1 |
| -7.5E+18 | IsMasterProtein | A0A8C5FPE5 | Carnitine O-palmitoyltransferase OS=Gadus morhua OX=8049 PE=3 SV=1                                                  | 6  | 3  | 3  | 3 | 765  | 86.9  | 8.46 | 9.03  | 3  | 1 |
| -7.5E+18 | IsMasterProtein | A0A8C5BYW5 | Mitochondrial poly(A) polymerase OS=Gadus morhua OX=8049 GN=mtpap PE=4 SV=1                                         | 10 | 3  | 4  | 3 | 565  | 62.8  | 8.92 | 9.83  | 3  | 1 |
| -7.5E+18 | IsMasterProtein | A0A8C5CEN5 | Integrin alpha-6-like OS=Gadus morhua OX=8049 GN=LOC115549061 PE=3 SV=1                                             | 4  | 3  | 3  | 3 | 1055 | 116.3 | 7.09 | 7.64  | 3  | 1 |
| -7.5E+18 | IsMasterProtein | A0A8C5ASF4 | Aggrecan OS=Gadus morhua OX=8049 GN=acan PE=4 SV=1                                                                  | 4  | 3  | 3  | 3 | 1394 | 147.6 | 4.84 | 7.4   | 3  | 1 |
| -7.5E+18 | IsMasterProtein | A0A8C5AI26 | Fatty acyl-CoA reductase OS=Gadus morhua OX=8049 PE=3 SV=1                                                          | 6  | 3  | 4  | 3 | 490  | 56.2  | 7.39 | 11.64 | 3  | 1 |
| -7.5E+18 | IsMasterProtein | A0A8C5ARF1 | Calpain 1, (mu/l) large subunit a OS=Gadus morhua OX=8049 GN=CAPN11 PE=3 SV=1                                       | 6  | 3  | 3  | 3 | 687  | 78.7  | 5.15 | 7.05  | 3  | 1 |
| -7.5E+18 | IsMasterProtein | A0A8C4ZLB9 | Spondin-1 OS=Gadus morhua OX=8049 PE=4 SV=1                                                                         | 4  | 3  | 3  | 3 | 781  | 86.5  | 6.71 | 8.45  | 3  | 1 |

|          |                 |            |                                                                                               |    |   |    |   |      |       |      |       |   |   |
|----------|-----------------|------------|-----------------------------------------------------------------------------------------------|----|---|----|---|------|-------|------|-------|---|---|
| -7.5E+18 | IsMasterProtein | A0A8C5B6D6 | MAP7 domain containing 3 OS=Gadus morhua OX=8049 GN=map7d3 PE=3 SV=1                          | 5  | 3 | 3  | 3 | 884  | 96.3  | 8.27 | 7.81  | 3 | 1 |
| -7.4E+18 | IsMasterProtein | A0A8C4Z562 | F-box and WD repeat domain containing 10 OS=Gadus morhua OX=8049 GN=fbxw10 PE=4 SV=1          | 5  | 3 | 3  | 3 | 1150 | 126.7 | 9.58 | 7.65  | 3 | 1 |
| -7.4E+18 | IsMasterProtein | A0A8C5BI82 | Proteasome 26S subunit, non-ATPase 3 OS=Gadus morhua OX=8049 GN=PSMD3 PE=3 SV=1               | 11 | 3 | 3  | 3 | 516  | 59.2  | 8.22 | 8.17  | 3 | 1 |
| -7.4E+18 | IsMasterProtein | A0A8C5C886 | Ubiquitin specific peptidase 28 OS=Gadus morhua OX=8049 GN=usp28 PE=4 SV=1                    | 5  | 3 | 3  | 3 | 1013 | 114.7 | 5.21 | 7.23  | 3 | 1 |
| -7.4E+18 | IsMasterProtein | A0A8C5CF50 | Catenin (cadherin-associated protein), delta 1 OS=Gadus morhua OX=8049 GN=ctnd1 PE=3 SV=1     | 9  | 3 | 3  | 3 | 930  | 101.7 | 7.62 | 8.43  | 3 | 1 |
| -7.4E+18 | IsMasterProtein | A0A8C5C2Q3 | ADAM metalloproteinase with thrombospondin type 1 motif, 14 OS=Gadus morhua OX=8049 PE=4 SV=1 | 3  | 3 | 3  | 3 | 1131 | 126.2 | 7.47 | 7.18  | 3 | 1 |
| -7.4E+18 | IsMasterProtein | A0A8C5AAT2 | JmjC domain-containing protein OS=Gadus morhua OX=8049 PE=4 SV=1                              | 2  | 3 | 3  | 3 | 3126 | 340.8 | 8.6  | 8.15  | 3 | 1 |
| -7.3E+18 | IsMasterProtein | A0A8C4ZVW5 | Choline transporter-like protein OS=Gadus morhua OX=8049 GN=slc44a2 PE=3 SV=1                 | 4  | 3 | 3  | 3 | 706  | 79.4  | 8.47 | 6.63  | 3 | 1 |
| -7.3E+18 | IsMasterProtein | A0A8C5BNE4 | Uncharacterized protein OS=Gadus morhua OX=8049 PE=3 SV=1                                     | 5  | 3 | 3  | 3 | 1304 | 145.1 | 7.37 | 8.36  | 3 | 1 |
| -7.3E+18 | IsMasterProtein | A0A8C4ZI97 | Grainyhead-like protein 2 homolog OS=Gadus morhua OX=8049 GN=LOC115553488 PE=4 SV=1           | 9  | 3 | 3  | 3 | 596  | 66.8  | 7.83 | 8.15  | 3 | 1 |
| -7.3E+18 | IsMasterProtein | A0A8C5C4A3 | Dedicator of cytokinesis 1 OS=Gadus morhua OX=8049 GN=dock1 PE=3 SV=1                         | 4  | 3 | 8  | 3 | 1841 | 212.8 | 7.43 | 22.91 | 3 | 1 |
| -7.2E+18 | IsMasterProtein | A0A8C5CSB9 | VPS35 endosomal protein-sorting factor-like OS=Gadus morhua OX=8049 PE=3 SV=1                 | 7  | 3 | 4  | 3 | 862  | 97.5  | 6.96 | 10.74 | 3 | 1 |
| -7.2E+18 | IsMasterProtein | A0A8C5C9I1 | Rho GTPase activating protein 29a OS=Gadus morhua OX=8049 GN=arhgap29a PE=4 SV=1              | 4  | 3 | 3  | 3 | 1422 | 155.2 | 6.52 | 7.4   | 3 | 1 |
| -7.2E+18 | IsMasterProtein | A0A8C5CLQ2 | Uncharacterized protein OS=Gadus morhua OX=8049 PE=4 SV=1                                     | 22 | 5 | 12 | 3 | 438  | 47.7  | 6.33 | 33.82 | 5 | 1 |
| -7.2E+18 | IsMasterProtein | A0A8C5FMG2 | ADAMTS-like 3 OS=Gadus morhua OX=8049 PE=4 SV=1                                               | 3  | 3 | 3  | 3 | 1622 | 177.3 | 8.18 | 6.74  | 3 | 1 |
| -7.2E+18 | IsMasterProtein | A0A8C5C8Y3 | Casein kinase II subunit alpha-like OS=Gadus morhua OX=8049 GN=LOC115545522 PE=3 SV=1         | 22 | 5 | 6  | 3 | 392  | 45.3  | 7.72 | 17.57 | 5 | 1 |
| -7.1E+18 | IsMasterProtein | A0A8C5FUP4 | Lymphocyte cytosolic protein 1 (L-plastin) OS=Gadus morhua OX=8049 PE=4 SV=1                  | 10 | 4 | 5  | 3 | 621  | 69.6  | 5.48 | 13.47 | 4 | 1 |
| -7E+18   | IsMasterProtein | A0A8C5AJ87 | RCR-type E3 ubiquitin transferase OS=Gadus morhua OX=8049 GN=mycbp2 PE=3 SV=1                 | 2  | 3 | 3  | 3 | 4725 | 515.1 | 7.08 | 7.53  | 3 | 1 |
| -7E+18   | IsMasterProtein | A0A8C5A5T6 | Talin 2a OS=Gadus morhua OX=8049 PE=4 SV=1                                                    | 2  | 3 | 3  | 3 | 2293 | 243.8 | 6.14 | 7.21  | 3 | 1 |
| -6.9E+18 | IsMasterProtein | A0A8C5FQF4 | VEGF nerve growth factor inducible OS=Gadus morhua OX=8049 PE=4 SV=1                          | 7  | 3 | 3  | 3 | 574  | 63.4  | 4.64 | 8.55  | 3 | 1 |
| -6.9E+18 | IsMasterProtein | A0A8C4ZF73 | LAM_G_DOMAIN domain-containing protein OS=Gadus morhua OX=8049 PE=4 SV=1                      | 7  | 3 | 4  | 3 | 808  | 78.6  | 5.48 | 10.24 | 3 | 1 |
| -6.9E+18 | IsMasterProtein | A0A8C5A2I3 | HIVEP zinc finger 2b OS=Gadus morhua OX=8049 PE=4 SV=1                                        | 2  | 3 | 4  | 3 | 1851 | 197.2 | 7.56 | 8.97  | 3 | 1 |
| -6.9E+18 | IsMasterProtein | A0A8C4Z3B3 | Uncharacterized protein OS=Gadus morhua OX=8049 PE=3 SV=1                                     | 9  | 3 | 3  | 3 | 452  | 51.1  | 6.67 | 8.52  | 3 | 1 |
| -6.9E+18 | IsMasterProtein | A0A8C5BWK6 | Proliferation-associated 2G4, b OS=Gadus morhua OX=8049 GN=pa2g4b PE=3 SV=1                   | 17 | 3 | 3  | 3 | 392  | 43.3  | 7.3  | 9.3   | 3 | 1 |
| -6.9E+18 | IsMasterProtein | A0A8C5CNX1 | Aldehyde dehydrogenase (NAD(+)) OS=Gadus morhua OX=8049 PE=3 SV=1                             | 7  | 3 | 3  | 3 | 535  | 58.2  | 7.27 | 7.78  | 3 | 1 |
| -6.9E+18 | IsMasterProtein | A0A8C4ZB15 | Uncharacterized protein OS=Gadus morhua OX=8049 PE=3 SV=1                                     | 9  | 3 | 3  | 3 | 671  | 73.9  | 6.07 | 7.93  | 3 | 1 |
| -6.8E+18 | IsMasterProtein | A0A8C5CNV7 | Myosin, heavy chain 10, non-muscle OS=Gadus morhua OX=8049 PE=3 SV=1                          | 4  | 6 | 6  | 3 | 2010 | 232   | 5.49 | 15.78 | 6 | 1 |
| -6.8E+18 | IsMasterProtein | A0A8C5FLG9 | Uncharacterized protein OS=Gadus morhua OX=8049 PE=4 SV=1                                     | 8  | 3 | 3  | 3 | 466  | 53.1  | 6.54 | 7.14  | 3 | 1 |
| -6.8E+18 | IsMasterProtein | A0A8C5FK90 | AF4/FMR2 family member 1-like OS=Gadus morhua OX=8049 GN=LOC115532168 PE=3 SV=1               | 7  | 3 | 5  | 3 | 1237 | 131.3 | 9.47 | 16.08 | 3 | 1 |
| -6.8E+18 | IsMasterProtein | A0A8C4ZJ41 | B9 protein domain 1 OS=Gadus morhua OX=8049 GN=b9d1 PE=4 SV=1                                 | 37 | 3 | 3  | 3 | 207  | 23.2  | 8.27 | 9     | 3 | 1 |
| -6.8E+18 | IsMasterProtein | A0A8C5BM59 | SEC7 domain-containing protein OS=Gadus morhua OX=8049 PE=4 SV=1                              | 4  | 3 | 3  | 3 | 2068 | 225.2 | 6.3  | 8.34  | 3 | 1 |
| -6.8E+18 | IsMasterProtein | A0A8C5AGJ9 | Liprin-beta-1-like OS=Gadus morhua OX=8049 GN=LOC115541421 PE=3 SV=1                          | 6  | 3 | 3  | 3 | 743  | 82.5  | 6.47 | 7.26  | 3 | 1 |
| -6.8E+18 | IsMasterProtein | A0A8C5D278 | Uncharacterized protein OS=Gadus morhua OX=8049 PE=4 SV=1                                     | 4  | 3 | 3  | 3 | 1327 | 135.8 | 7.77 | 6.96  | 3 | 1 |
| -6.8E+18 | IsMasterProtein | A0A8C5A5C7 | Ryanodine receptor 1 OS=Gadus morhua OX=8049 PE=4 SV=1                                        | 1  | 3 | 3  | 3 | 4918 | 557.1 | 5.72 | 6.62  | 3 | 1 |
| -6.8E+18 | IsMasterProtein | A0A8C5ANT7 | Calmodulin binding transcription activator 1a OS=Gadus morhua OX=8049 PE=3 SV=1               | 3  | 3 | 3  | 3 | 1882 | 199.5 | 7.53 | 7.87  | 3 | 1 |

|          |                 |            |                                                                                                |    |    |    |   |      |       |       |        |    |   |
|----------|-----------------|------------|------------------------------------------------------------------------------------------------|----|----|----|---|------|-------|-------|--------|----|---|
| -6.7E+18 | IsMasterProtein | A0A8C5BVY0 | Uncharacterized protein OS=Gadus morhua OX=8049 PE=4 SV=1                                      | 10 | 3  | 3  | 3 | 582  | 65.4  | 8.66  | 7.55   | 3  | 1 |
| -6.7E+18 | IsMasterProtein | A0A8C5B5A3 | Phospholipid-transporting ATPase OS=Gadus morhua OX=8049 GN=LOC115545885 PE=3 SV=1             | 8  | 3  | 3  | 3 | 1126 | 127.1 | 7.68  | 8.9    | 3  | 1 |
| -6.7E+18 | IsMasterProtein | A0A8C4Z9I6 | NADH-cytochrome b5 reductase OS=Gadus morhua OX=8049 GN=LOC115532316 PE=3 SV=1                 | 9  | 3  | 3  | 3 | 294  | 33    | 8.38  | 6.71   | 3  | 1 |
| -6.6E+18 | IsMasterProtein | A0A8C5FBU8 | Uncharacterized protein OS=Gadus morhua OX=8049 PE=3 SV=1                                      | 4  | 3  | 3  | 3 | 1318 | 147.9 | 6.77  | 8.51   | 3  | 1 |
| -6.6E+18 | IsMasterProtein | A0A8C4ZVB5 | TTF-type domain-containing protein OS=Gadus morhua OX=8049 PE=4 SV=1                           | 4  | 3  | 7  | 3 | 826  | 95.5  | 6.84  | 15.35  | 3  | 1 |
| -6.6E+18 | IsMasterProtein | A0A8C5AZK1 | Protein disulfide isomerase family A, member 5 OS=Gadus morhua OX=8049 PE=4 SV=1               | 7  | 3  | 3  | 3 | 547  | 61.9  | 8.5   | 7.77   | 3  | 1 |
| -6.6E+18 | IsMasterProtein | A0A8C5BEP0 | Tubulin alpha-1A chain OS=Gadus morhua OX=8049 GN=LOC115547025 PE=3 SV=1                       | 48 | 16 | 45 | 3 | 571  | 63.4  | 5.16  | 141.05 | 16 | 1 |
| -6.5E+18 | IsMasterProtein | A0A8C5FLB7 | Cyclin-dependent kinase 11B OS=Gadus morhua OX=8049 GN=cdk11b PE=3 SV=1                        | 8  | 3  | 3  | 3 | 836  | 96.1  | 5.6   | 8.49   | 3  | 1 |
| -6.5E+18 | IsMasterProtein | A0A8C4ZM80 | 40S ribosomal protein S23 OS=Gadus morhua OX=8049 GN=rrs23 PE=3 SV=1                           | 21 | 3  | 3  | 3 | 141  | 15.7  | 10.48 | 7.68   | 3  | 1 |
| -6.5E+18 | IsMasterProtein | A0A8C5C237 | Retinoblastoma 1 OS=Gadus morhua OX=8049 GN=rb1 PE=3 SV=1                                      | 6  | 3  | 3  | 3 | 968  | 109.2 | 8.31  | 8.05   | 3  | 1 |
| -6.5E+18 | IsMasterProtein | A0A8C4YU91 | POP1 homolog, ribonuclease P/MRP subunit OS=Gadus morhua OX=8049 GN=POP1 PE=4 SV=1             | 7  | 3  | 3  | 3 | 1003 | 109.6 | 9.76  | 8.08   | 3  | 1 |
| -6.5E+18 | IsMasterProtein | A0A8C5CR49 | Adhesion G protein-coupled receptor B3 OS=Gadus morhua OX=8049 GN=adgrb3 PE=4 SV=1             | 3  | 3  | 3  | 3 | 1436 | 159.2 | 7.65  | 6.96   | 3  | 1 |
| -6.4E+18 | IsMasterProtein | A0A8C5FL26 | Topoisomerase I binding, arginine/serine-rich a OS=Gadus morhua OX=8049 PE=4 SV=1              | 6  | 3  | 3  | 3 | 723  | 81.2  | 8.97  | 7.65   | 3  | 1 |
| -6.3E+18 | IsMasterProtein | A0A8C5CQB4 | Serine/threonine-protein kinase TOR OS=Gadus morhua OX=8049 PE=3 SV=1                          | 2  | 3  | 3  | 3 | 2471 | 280.3 | 6.9   | 7.35   | 3  | 1 |
| -6.3E+18 | IsMasterProtein | A0A8C5A8N9 | SET nuclear proto-oncogene a OS=Gadus morhua OX=8049 GN=seta PE=3 SV=1                         | 14 | 3  | 3  | 3 | 271  | 31.2  | 4.36  | 8.64   | 3  | 1 |
| -6.3E+18 | IsMasterProtein | A0A8C5BUN8 | Non-specific serine/threonine protein kinase OS=Gadus morhua OX=8049 GN=LOC115548526 PE=4 SV=1 | 20 | 3  | 3  | 3 | 408  | 45.4  | 6.64  | 9.36   | 3  | 1 |
| -6.3E+18 | IsMasterProtein | A0A8C5FP53 | Ciliary rootlet coiled-coil, rootletin OS=Gadus morhua OX=8049 GN=CROCC PE=4 SV=1              | 2  | 3  | 3  | 3 | 1695 | 190.7 | 7.17  | 7.37   | 3  | 1 |
| -6.3E+18 | IsMasterProtein | A0A8C5CLM4 | D-3-phosphoglycerate dehydrogenase OS=Gadus morhua OX=8049 GN=phgdh PE=3 SV=1                  | 8  | 3  | 3  | 3 | 528  | 54.8  | 7.31  | 7.99   | 3  | 1 |
| -6.3E+18 | IsMasterProtein | A0A8C5C2H7 | RAB2A, member RAS oncogene family OS=Gadus morhua OX=8049 GN=rab2a PE=4 SV=1                   | 17 | 3  | 3  | 3 | 238  | 26.3  | 6.8   | 9.16   | 3  | 1 |
| -6.2E+18 | IsMasterProtein | A0A8C5FIR8 | Nucleosome assembly protein 1-like 1 OS=Gadus morhua OX=8049 GN=nap1l1 PE=3 SV=1               | 12 | 3  | 4  | 3 | 433  | 49.1  | 4.7   | 11.7   | 3  | 1 |
| -6.2E+18 | IsMasterProtein | A0A8C4Z154 | ATP synthase-coupling factor 6, mitochondrial OS=Gadus morhua OX=8049 GN=atp5pf PE=3 SV=1      | 25 | 3  | 3  | 3 | 110  | 12.1  | 9.6   | 8.29   | 3  | 1 |
| -6.2E+18 | IsMasterProtein | A0A8C5CVF4 | Solute carrier family 25 member 11 OS=Gadus morhua OX=8049 GN=slc25a11 PE=3 SV=1               | 7  | 3  | 3  | 3 | 490  | 52    | 8.6   | 8.55   | 3  | 1 |
| -6.2E+18 | IsMasterProtein | A0A8C5A3T3 | Tyrosine-protein kinase OS=Gadus morhua OX=8049 GN=tyk2 PE=3 SV=1                              | 4  | 3  | 4  | 3 | 1006 | 114.2 | 7.02  | 9.37   | 3  | 1 |
| -6.2E+18 | IsMasterProtein | A0A8C5F5V1 | Adaptor related protein complex 3 subunit sigma 1 OS=Gadus morhua OX=8049 GN=ap3s1 PE=3 SV=1   | 24 | 4  | 4  | 3 | 193  | 21.9  | 5.25  | 12.6   | 4  | 1 |
| -6.1E+18 | IsMasterProtein | A0A8C4ZXW1 | Proteasome subunit beta OS=Gadus morhua OX=8049 GN=psmb1 PE=3 SV=1                             | 18 | 3  | 4  | 3 | 237  | 26.1  | 7.49  | 12.17  | 3  | 1 |
| -6.1E+18 | IsMasterProtein | A0A8C5CZF1 | Myosin IG OS=Gadus morhua OX=8049 PE=3 SV=1                                                    | 6  | 3  | 3  | 3 | 983  | 111.9 | 8.62  | 7.78   | 3  | 1 |
| -6.1E+18 | IsMasterProtein | A0A8C5AY05 | 60S ribosomal protein L17 OS=Gadus morhua OX=8049 PE=3 SV=1                                    | 15 | 3  | 3  | 3 | 221  | 25.8  | 10.13 | 8.06   | 3  | 1 |
| -6.1E+18 | IsMasterProtein | A0A8C5B6L1 | Ttk protein kinase OS=Gadus morhua OX=8049 GN=ttk PE=4 SV=1                                    | 5  | 3  | 3  | 3 | 891  | 100.9 | 8.27  | 7.18   | 3  | 1 |
| -6E+18   | IsMasterProtein | A0A8C4ZK93 | 60S ribosomal protein L14 OS=Gadus morhua OX=8049 GN=rp14 PE=3 SV=1                            | 25 | 3  | 3  | 3 | 137  | 16    | 10.35 | 7.7    | 3  | 1 |
| -6E+18   | IsMasterProtein | A0A8C4Z4G4 | Complement factor properdin OS=Gadus morhua OX=8049 GN=cfp PE=4 SV=1                           | 8  | 3  | 3  | 3 | 574  | 62.3  | 6.24  | 7.71   | 3  | 1 |
| -5.9E+18 | IsMasterProtein | A0A0D3MJC9 | Cathelicidin 1 OS=Gadus morhua OX=8049 PE=4 SV=1                                               | 26 | 3  | 4  | 3 | 193  | 20.6  | 10.48 | 11.2   | 3  | 1 |
| -5.9E+18 | IsMasterProtein | A0A8C4Z0Z2 | TOX high mobility group box family member 4 b OS=Gadus morhua OX=8049 PE=4 SV=1                | 6  | 3  | 3  | 3 | 646  | 67.1  | 4.93  | 7.85   | 3  | 1 |

|          |                 |            |                                                                                                                                      |    |   |    |   |      |       |       |       |   |   |
|----------|-----------------|------------|--------------------------------------------------------------------------------------------------------------------------------------|----|---|----|---|------|-------|-------|-------|---|---|
| -5.8E+18 | IsMasterProtein | A0A8C5C1X8 | Insulin receptor substrate 2a OS=Gadus morhua OX=8049 PE=4 SV=1                                                                      | 7  | 3 | 4  | 3 | 1128 | 118.8 | 8.76  | 11.56 | 3 | 1 |
| -5.8E+18 | IsMasterProtein | A0A8C4ZA19 | Transaldolase OS=Gadus morhua OX=8049 GN=taldo1 PE=3 SV=1                                                                            | 13 | 3 | 3  | 3 | 338  | 37.8  | 6.47  | 8.46  | 3 | 1 |
| -5.8E+18 | IsMasterProtein | A0A8C4Z2F1 | Dystroglycan 1 OS=Gadus morhua OX=8049 PE=4 SV=1                                                                                     | 9  | 3 | 4  | 3 | 801  | 87.9  | 8.69  | 11.08 | 3 | 1 |
| -5.7E+18 | IsMasterProtein | A0A8C4YY15 | Epidermal growth factor OS=Gadus morhua OX=8049 GN=egf PE=4 SV=1                                                                     | 9  | 3 | 3  | 3 | 777  | 83.2  | 5.19  | 8.18  | 3 | 1 |
| -5.7E+18 | IsMasterProtein | A0A8C4Z1F0 | Choline transporter-like protein OS=Gadus morhua OX=8049 GN=LOC115540121 PE=3 SV=1                                                   | 10 | 3 | 3  | 3 | 630  | 70.8  | 8.81  | 9.16  | 3 | 1 |
| -5.6E+18 | IsMasterProtein | A0A8C5B2U3 | Carnitine O-palmitoyltransferase OS=Gadus morhua OX=8049 PE=3 SV=1                                                                   | 8  | 3 | 3  | 3 | 1046 | 118.1 | 8.06  | 9.13  | 3 | 1 |
| -5.6E+18 | IsMasterProtein | A0A8C5CC53 | Uncharacterized protein OS=Gadus morhua OX=8049 PE=4 SV=1                                                                            | 6  | 3 | 3  | 3 | 892  | 96.7  | 8.07  | 8.03  | 3 | 1 |
| -5.6E+18 | IsMasterProtein | A0A8C5BGV4 | Uncharacterized protein OS=Gadus morhua OX=8049 PE=4 SV=1                                                                            | 2  | 3 | 3  | 3 | 1937 | 199.6 | 7.36  | 7.3   | 3 | 1 |
| -5.6E+18 | IsMasterProtein | A0A8C5F8U9 | Rap guanine nucleotide exchange factor (GEF) 6 OS=Gadus morhua OX=8049 GN=rapgef6 PE=3 SV=1                                          | 5  | 3 | 3  | 3 | 1555 | 171.7 | 6.54  | 8.28  | 3 | 1 |
| -5.6E+18 | IsMasterProtein | A0A8C5BQ62 | Protein NO VEIN-like OS=Gadus morhua OX=8049 GN=wu:fj29h11 PE=4 SV=1                                                                 | 2  | 3 | 3  | 3 | 3213 | 353.4 | 6.21  | 8.88  | 3 | 1 |
| -5.6E+18 | IsMasterProtein | A0A8C5ARP2 | NSFL1 cofactor p47 OS=Gadus morhua OX=8049 PE=4 SV=1                                                                                 | 8  | 3 | 3  | 3 | 402  | 44.1  | 5.21  | 8.16  | 3 | 1 |
| -5.5E+18 | IsMasterProtein | A0A8C5AQK8 | Uncharacterized protein OS=Gadus morhua OX=8049 PE=4 SV=1                                                                            | 8  | 3 | 3  | 3 | 767  | 83.6  | 7.83  | 8     | 3 | 1 |
| -5.5E+18 | IsMasterProtein | A0A8C4ZMQ7 | WD repeat and FYVE domain containing 3 OS=Gadus morhua OX=8049 PE=4 SV=1                                                             | 3  | 3 | 3  | 3 | 3488 | 388.9 | 6.81  | 8.83  | 3 | 1 |
| -5.4E+18 | IsMasterProtein | A0A8C4YVH2 | Excision repair cross-complementation group 4 OS=Gadus morhua OX=8049 PE=3 SV=1                                                      | 8  | 3 | 3  | 3 | 901  | 100.8 | 7.4   | 8.47  | 3 | 1 |
| -5.4E+18 | IsMasterProtein | A0A8C5BHJ6 | Ubiquitin protein ligase E3 component n-recognin 4 OS=Gadus morhua OX=8049 GN=ubr4 PE=3 SV=1                                         | 1  | 3 | 3  | 3 | 5172 | 571.2 | 6.07  | 7.41  | 3 | 1 |
| -5.4E+18 | IsMasterProtein | A0A8C4YV09 | PHB domain-containing protein OS=Gadus morhua OX=8049 PE=3 SV=1                                                                      | 14 | 3 | 3  | 3 | 326  | 36.5  | 6.89  | 8.35  | 3 | 1 |
| -5.4E+18 | IsMasterProtein | A0A8C5CKR8 | Tyrosine 3-monoxygenase/tryptophan 5-monoxygenase activation protein, beta polypeptide a OS=Gadus morhua OX=8049 GN=ywhaba PE=3 SV=1 | 30 | 5 | 7  | 3 | 244  | 27.8  | 4.84  | 22.79 | 5 | 1 |
| -5.3E+18 | IsMasterProtein | A0A8C5CUB9 | Cytochrome b-c1 complex subunit 1, mitochondrial OS=Gadus morhua OX=8049 GN=LOC115556535 PE=4 SV=1                                   | 10 | 3 | 4  | 3 | 447  | 48.8  | 6.11  | 10.44 | 3 | 1 |
| -5.3E+18 | IsMasterProtein | A0A8C4YZL5 | Ribosomal protein L24 OS=Gadus morhua OX=8049 GN=RPL24 PE=3 SV=1                                                                     | 19 | 3 | 3  | 3 | 157  | 18    | 11.17 | 8.4   | 3 | 1 |
| -5.3E+18 | IsMasterProtein | A0A8C5AR61 | Uncharacterized protein OS=Gadus morhua OX=8049 PE=4 SV=1                                                                            | 12 | 3 | 3  | 3 | 509  | 55.2  | 9.45  | 8.17  | 3 | 1 |
| -5.3E+18 | IsMasterProtein | A0A8C5FP86 | Uncharacterized protein OS=Gadus morhua OX=8049 PE=4 SV=1                                                                            | 2  | 3 | 3  | 3 | 3158 | 349.7 | 8     | 7.7   | 3 | 1 |
| -5.3E+18 | IsMasterProtein | A0A8C5BKR6 | Calcium/calmodulin-dependent protein kinase OS=Gadus morhua OX=8049 PE=3 SV=1                                                        | 17 | 4 | 4  | 3 | 464  | 52    | 7.39  | 11.03 | 4 | 1 |
| -5.2E+18 | IsMasterProtein | A0A8C5FPC3 | Retinal-specific phospholipid-transporting ATPase ABCA4-like OS=Gadus morhua OX=8049 GN=LOC115548542 PE=4 SV=1                       | 3  | 3 | 3  | 3 | 2203 | 248.6 | 6.51  | 7.5   | 3 | 1 |
| -5.2E+18 | IsMasterProtein | A0A8C5F462 | HECT domain-containing protein OS=Gadus morhua OX=8049 PE=4 SV=1                                                                     | 2  | 3 | 3  | 3 | 4138 | 450.8 | 6.48  | 8.57  | 3 | 1 |
| -5.2E+18 | IsMasterProtein | A0A8C5F7M7 | 3-hydroxyisobutyryl-CoA hydrolase, mitochondrial OS=Gadus morhua OX=8049 GN=hibch PE=3 SV=1                                          | 9  | 3 | 3  | 3 | 381  | 42    | 7.4   | 7.79  | 3 | 1 |
| -5.2E+18 | IsMasterProtein | A0A8C4ZGN8 | Ryanodine receptor 2 OS=Gadus morhua OX=8049 GN=RYP2 PE=4 SV=1                                                                       | 4  | 9 | 11 | 3 | 4896 | 553.3 | 6.16  | 25.33 | 9 | 1 |
| -5.1E+18 | IsMasterProtein | A0A8C5CKX4 | Proton-translocating NAD(P)(+) transhydrogenase OS=Gadus morhua OX=8049 PE=3 SV=1                                                    | 4  | 4 | 4  | 3 | 1088 | 113.4 | 7.05  | 9.43  | 4 | 1 |
| -5.1E+18 | IsMasterProtein | A0A8C5FGY4 | Chromosome 4 C7orf57 homolog OS=Gadus morhua OX=8049 GN=c4h7orf57 PE=4 SV=1                                                          | 22 | 3 | 3  | 3 | 289  | 31.3  | 7.83  | 9.05  | 3 | 1 |
| -5.1E+18 | IsMasterProtein | A0A8C5F826 | SIN3 transcription regulator family member B OS=Gadus morhua OX=8049 GN=sin3b PE=4 SV=1                                              | 4  | 3 | 3  | 3 | 1127 | 128.9 | 8.31  | 7.61  | 3 | 1 |
| -5E+18   | IsMasterProtein | A0A8C5FH92 | Transporter 1, ATP-binding cassette, sub-family B (MDR/TAP) OS=Gadus morhua OX=8049 GN=tap1 PE=4 SV=1                                | 7  | 3 | 3  | 3 | 729  | 80.9  | 6.34  | 7.61  | 3 | 1 |
| -5E+18   | IsMasterProtein | A0A8C5FQ34 | S-adenosylhomocysteine hydrolase-like protein 1 OS=Gadus morhua OX=8049 GN=LOC115557210 PE=3 SV=1                                    | 12 | 6 | 7  | 3 | 569  | 63.2  | 7.28  | 18.31 | 6 | 1 |
| -5E+18   | IsMasterProtein | A0A8C5BR09 | PDZ domain containing 2 OS=Gadus morhua OX=8049 GN=pdzd2 PE=4 SV=1                                                                   | 2  | 3 | 3  | 3 | 2374 | 254.9 | 7.2   | 7.97  | 3 | 1 |
| -5E+18   | IsMasterProtein | A0A8C5A9J6 | Mitogen-activated protein kinase kinase kinase 1, E3 ubiquitin protein ligase OS=Gadus morhua OX=8049 GN=map3k1 PE=4 SV=1            | 6  | 3 | 3  | 3 | 1366 | 150.1 | 8.03  | 7.76  | 3 | 1 |
| -4.9E+18 | IsMasterProtein | A0A8C4ZTY4 | Inosine-5'-monophosphate dehydrogenase OS=Gadus morhua OX=8049 GN=IMPDH PE=3 SV=1                                                    | 7  | 3 | 3  | 3 | 537  | 57.7  | 7.52  | 6.73  | 3 | 1 |
| -4.9E+18 | IsMasterProtein | A0A8C4ZBN4 | Leucine rich pentatricopeptide repeat containing OS=Gadus morhua OX=8049 GN=LRPPRC PE=4 SV=1                                         | 8  | 4 | 5  | 3 | 1442 | 160.6 | 6.33  | 15.6  | 4 | 1 |



|          |                 |             |                                                                                                                |    |    |    |   |      |       |      |       |    |   |
|----------|-----------------|-------------|----------------------------------------------------------------------------------------------------------------|----|----|----|---|------|-------|------|-------|----|---|
| -4.8E+18 | IsMasterProtein | A0A8C4ZFY4  | Thrombospondin 4a OS=Gadus morhua OX=8049 GN=thbs4a PE=3 SV=1                                                  | 4  | 3  | 3  | 3 | 952  | 103.8 | 4.53 | 8.39  | 3  | 1 |
| -4.8E+18 | IsMasterProtein | A0A8C5B4Z4  | Agnet-like domain-containing protein OS=Gadus morhua OX=8049 PE=3 SV=1                                         | 8  | 3  | 3  | 3 | 662  | 73.9  | 9.23 | 7.13  | 3  | 1 |
| -4.8E+18 | IsMasterProtein | A0A8C5CQB0  | Proline rich 14 OS=Gadus morhua OX=8049 GN=prr14 PE=4 SV=1                                                     | 7  | 3  | 4  | 3 | 1340 | 144.8 | 8.95 | 8.55  | 3  | 1 |
| -4.8E+18 | IsMasterProtein | A0A8C5AII8  | DNA replication ATP-dependent helicase/nuclease OS=Gadus morhua OX=8049 GN=dna2 PE=3 SV=1                      | 4  | 3  | 3  | 3 | 1386 | 152.7 | 8    | 7.47  | 3  | 1 |
| -4.8E+18 | IsMasterProtein | A0A8C5AT17  | Phospholipid-transporting ATPase OS=Gadus morhua OX=8049 GN=ATP9A PE=3 SV=1                                    | 5  | 3  | 3  | 3 | 1015 | 115.2 | 8.38 | 7.8   | 3  | 1 |
| -4.7E+18 | IsMasterProtein | A0A8C5B854  | Glutamine--fructose-6-phosphate transaminase (isomerizing) OS=Gadus morhua OX=8049 GN=gfpt1 PE=4 SV=1          | 5  | 3  | 3  | 3 | 704  | 79.3  | 6.6  | 7.38  | 3  | 1 |
| -4.7E+18 | IsMasterProtein | A0A8C5CL23  | Uncharacterized protein OS=Gadus morhua OX=8049 PE=4 SV=1                                                      | 13 | 19 | 22 | 3 | 1635 | 183.4 | 6.18 | 61.32 | 19 | 1 |
| -4.7E+18 | IsMasterProtein | A0A8C4ZHI8  | Uncharacterized protein OS=Gadus morhua OX=8049 PE=3 SV=1                                                      | 20 | 4  | 4  | 3 | 239  | 27.6  | 8.21 | 10.36 | 4  | 1 |
| -4.7E+18 | IsMasterProtein | A0A8C5ACP6  | Tyrosine-protein kinase OS=Gadus morhua OX=8049 PE=3 SV=1                                                      | 6  | 3  | 3  | 3 | 1126 | 128.6 | 7.43 | 8.78  | 3  | 1 |
| -4.6E+18 | IsMasterProtein | A0A8C5F622  | AP-2 complex subunit mu OS=Gadus morhua OX=8049 PE=3 SV=1                                                      | 11 | 3  | 3  | 3 | 456  | 51.8  | 9.55 | 7.87  | 3  | 1 |
| -4.6E+18 | IsMasterProtein | A0A8C4ZR19  | Kinesin-like protein OS=Gadus morhua OX=8049 GN=KIF18A PE=3 SV=1                                               | 6  | 3  | 3  | 3 | 896  | 100   | 9.13 | 8.21  | 3  | 1 |
| -4.5E+18 | IsMasterProtein | A0A8C5A0G9  | Tripeptidyl-peptidase 2 OS=Gadus morhua OX=8049 GN=tp2 PE=4 SV=1                                               | 3  | 3  | 3  | 3 | 1175 | 129.6 | 6.51 | 7.5   | 3  | 1 |
| -4.5E+18 | IsMasterProtein | A0A8C5B6C3  | Signal transducer and activator of transcription OS=Gadus morhua OX=8049 GN=stat1a PE=3 SV=1                   | 8  | 4  | 4  | 3 | 745  | 85.9  | 5.72 | 12.81 | 4  | 1 |
| -4.5E+18 | IsMasterProtein | A0A8C5A8G0  | SAM and SH3 domain-containing protein 1-like OS=Gadus morhua OX=8049 GN=LOC115543522 PE=4 SV=1                 | 6  | 3  | 4  | 3 | 1102 | 119.5 | 7.27 | 10.58 | 3  | 1 |
| -4.4E+18 | IsMasterProtein | cRAP_Q14525 | Keratin, type I cuticular Ha3-II OS=Homo sapiens GN=KRT33B PE=2 SV=3                                           | 26 | 9  | 9  | 3 | 404  | 46.2  | 4.84 | 26.49 | 9  | 1 |
| -4.4E+18 | IsMasterProtein | A0A8C4ZWB3  | Sulfotransferase OS=Gadus morhua OX=8049 GN=chst3a PE=3 SV=1                                                   | 13 | 3  | 3  | 3 | 428  | 49    | 8.75 | 8.91  | 3  | 1 |
| -4.4E+18 | IsMasterProtein | A0A8C5A8V0  | Aminopeptidase OS=Gadus morhua OX=8049 GN=npepps PE=3 SV=1                                                     | 4  | 3  | 3  | 3 | 886  | 99.3  | 5.3  | 8.87  | 3  | 1 |
| -4.4E+18 | IsMasterProtein | A0A8C5CGY4  | Uncharacterized LOC115536180 OS=Gadus morhua OX=8049 GN=si:ch211-13c6.2 PE=4 SV=1                              | 6  | 3  | 3  | 3 | 926  | 105.8 | 6.44 | 8.21  | 3  | 1 |
| -4.4E+18 | IsMasterProtein | A0A8C5CJN2  | PHD finger protein 3 OS=Gadus morhua OX=8049 PE=4 SV=1                                                         | 3  | 3  | 3  | 3 | 1831 | 191.9 | 8.5  | 8.03  | 3  | 1 |
| -4.3E+18 | IsMasterProtein | A0A8C5A9V7  | Cytochrome b-c1 complex subunit 8 OS=Gadus morhua OX=8049 GN=LOC115552216 PE=3 SV=1                            | 6  | 3  | 4  | 3 | 888  | 99.4  | 5.55 | 9.73  | 3  | 1 |
| -4.3E+18 | IsMasterProtein | A0A8C5B0S2  | Eukaryotic translation initiation factor 5B OS=Gadus morhua OX=8049 GN=eif5b PE=4 SV=1                         | 4  | 3  | 3  | 3 | 1150 | 129.4 | 5.38 | 7.87  | 3  | 1 |
| -4.3E+18 | IsMasterProtein | A0A8C4YYG1  | Laminin subunit alpha 3 OS=Gadus morhua OX=8049 GN=LAMA3 PE=4 SV=1                                             | 2  | 3  | 3  | 3 | 2725 | 300.6 | 7.69 | 8.28  | 3  | 1 |
| -4.2E+18 | IsMasterProtein | A0A8C4Z482  | OTU deubiquitinase with linear linkage specificity a OS=Gadus morhua OX=8049 PE=3 SV=1                         | 6  | 3  | 3  | 3 | 843  | 91.9  | 4.63 | 7.42  | 3  | 1 |
| -4.2E+18 | IsMasterProtein | A0A8C5CKD0  | Uncharacterized protein OS=Gadus morhua OX=8049 PE=4 SV=1                                                      | 1  | 3  | 3  | 3 | 4732 | 542   | 5.21 | 6.7   | 3  | 1 |
| -4.2E+18 | IsMasterProtein | A0A8C5BHH2  | Ribosomal protein S14 OS=Gadus morhua OX=8049 GN=rps14 PE=3 SV=1                                               | 14 | 3  | 3  | 3 | 184  | 19.8  | 9.66 | 7.8   | 3  | 1 |
| -4.2E+18 | IsMasterProtein | A0A8C4ZXU5  | Annexin OS=Gadus morhua OX=8049 GN=anxa13 PE=3 SV=1                                                            | 14 | 3  | 3  | 3 | 309  | 34.7  | 4.61 | 8.95  | 3  | 1 |
| -4.1E+18 | IsMasterProtein | A0A8C4Z6K2  | Uncharacterized protein OS=Gadus morhua OX=8049 PE=4 SV=1                                                      | 3  | 3  | 5  | 3 | 2217 | 232.4 | 8.48 | 13.23 | 3  | 1 |
| -4.1E+18 | IsMasterProtein | A0A8C5AMS8  | Chloride channel, voltage-sensitive 1b OS=Gadus morhua OX=8049 GN=clcn1b PE=4 SV=1                             | 6  | 3  | 3  | 3 | 926  | 101.7 | 7.03 | 7.11  | 3  | 1 |
| -4E+18   | IsMasterProtein | A0A8C5FXG5  | Pleckstrin homology domain containing, family H (with MyTH4 domain) member 2 OS=Gadus morhua OX=8049 PE=4 SV=1 | 5  | 3  | 3  | 3 | 1219 | 134.1 | 8.29 | 7.7   | 3  | 1 |
| -4E+18   | IsMasterProtein | A0A8C5CB14  | Oxysterol-binding protein OS=Gadus morhua OX=8049 PE=3 SV=1                                                    | 7  | 4  | 4  | 3 | 882  | 98.3  | 5.76 | 10.44 | 4  | 1 |
| -4E+18   | IsMasterProtein | A0A8C5FQ75  | Lysophosphatidic acid receptor 2b OS=Gadus morhua OX=8049 GN=lpar2b PE=3 SV=1                                  | 18 | 3  | 3  | 3 | 369  | 42.2  | 8.87 | 9.42  | 3  | 1 |
| -4E+18   | IsMasterProtein | A0A8C4YVN4  | Ig-like domain-containing protein OS=Gadus morhua OX=8049 PE=4 SV=1                                            | 34 | 4  | 5  | 3 | 122  | 12.7  | 5.83 | 15.26 | 4  | 1 |
| -3.9E+18 | IsMasterProtein | A0A8C5CUN9  | Tropomyosin 4a OS=Gadus morhua OX=8049 GN=TPM4 PE=3 SV=1                                                       | 28 | 6  | 6  | 3 | 253  | 29.1  | 5.01 | 17.01 | 6  | 1 |
| -3.9E+18 | IsMasterProtein | A0A8C5CZP9  | Fras1 related extracellular matrix 1a OS=Gadus morhua OX=8049 PE=3 SV=1                                        | 4  | 3  | 3  | 3 | 2163 | 237.6 | 5.95 | 7.87  | 3  | 1 |
| -3.8E+18 | IsMasterProtein | A0A8C5CYE9  | ATP-dependent 6-phosphofructokinase OS=Gadus morhua OX=8049 GN=PFKP PE=3 SV=1                                  | 9  | 3  | 3  | 3 | 786  | 86    | 6.95 | 7.98  | 3  | 1 |
| -3.8E+18 | IsMasterProtein | A0A8C5CIE7  | Ribonuclease H OS=Gadus morhua OX=8049 PE=3 SV=1                                                               | 5  | 3  | 3  | 3 | 1329 | 151.5 | 9.03 | 8.39  | 3  | 1 |
| -3.7E+18 | IsMasterProtein | A0A8C5AP94  | Elastin microfibril interfacer 2a OS=Gadus morhua OX=8049 GN=emilin2a PE=4 SV=1                                | 6  | 3  | 3  | 3 | 1108 | 120.8 | 6.96 | 8.03  | 3  | 1 |



|          |                 |            |                                                                                                                       |    |   |   |   |      |       |       |       |   |   |
|----------|-----------------|------------|-----------------------------------------------------------------------------------------------------------------------|----|---|---|---|------|-------|-------|-------|---|---|
| -3.7E+18 | IsMasterProtein | A0A8C5BJQ9 | Tubulin-specific chaperone D OS=Gadus morhua OX=8049 GN=tbcd PE=3 SV=1                                                | 4  | 3 | 4 | 3 | 1146 | 127.7 | 6.55  | 9.12  | 3 | 1 |
| -3.7E+18 | IsMasterProtein | A0A8C5BBN8 | Uncharacterized protein OS=Gadus morhua OX=8049 PE=4 SV=1                                                             | 5  | 3 | 3 | 3 | 1237 | 136.7 | 5.53  | 8.55  | 3 | 1 |
| -3.7E+18 | IsMasterProtein | A0A8C5BKC7 | Calpain 7 OS=Gadus morhua OX=8049 GN=capn7 PE=3 SV=1                                                                  | 8  | 3 | 3 | 3 | 812  | 91.6  | 7.3   | 8.89  | 3 | 1 |
| -3.6E+18 | IsMasterProtein | A0A8C5FU45 | SFI1 centrin binding protein OS=Gadus morhua OX=8049 PE=4 SV=1                                                        | 5  | 3 | 3 | 3 | 943  | 113   | 10.96 | 7.79  | 3 | 1 |
| -3.6E+18 | IsMasterProtein | A0A8C5BST5 | Collagen, type VI, alpha 3 OS=Gadus morhua OX=8049 GN=COL6A3 PE=4 SV=1                                                | 2  | 3 | 3 | 3 | 3089 | 331.6 | 6.64  | 7.63  | 3 | 1 |
| -3.6E+18 | IsMasterProtein | A0A8C5CSD3 | Carboxypeptidase vitellogenic like OS=Gadus morhua OX=8049 PE=3 SV=1                                                  | 8  | 3 | 3 | 3 | 478  | 54.5  | 6.21  | 9     | 3 | 1 |
| -3.6E+18 | IsMasterProtein | A0A8C4ZLR6 | DNA topoisomerase OS=Gadus morhua OX=8049 PE=3 SV=1                                                                   | 5  | 3 | 3 | 3 | 854  | 95.4  | 8.03  | 6.22  | 3 | 1 |
| -3.6E+18 | IsMasterProtein | A0A8C4ZTM6 | Peroxioredoxin-6 OS=Gadus morhua OX=8049 GN=prdx6 PE=3 SV=1                                                           | 21 | 3 | 3 | 3 | 221  | 24.2  | 5.99  | 7.85  | 3 | 1 |
| -3.6E+18 | IsMasterProtein | A0A8C5FTM7 | Neurexin 3a OS=Gadus morhua OX=8049 PE=3 SV=1                                                                         | 4  | 3 | 3 | 3 | 1617 | 175.4 | 6.15  | 9.07  | 3 | 1 |
| -3.5E+18 | IsMasterProtein | A0A8C5BLT2 | Spectrin repeat containing, nuclear envelope family member 3 OS=Gadus morhua OX=8049 PE=4 SV=1                        | 6  | 3 | 3 | 3 | 1086 | 120.9 | 6.7   | 7.89  | 3 | 1 |
| -3.4E+18 | IsMasterProtein | A0A8C5A076 | DNA ligase OS=Gadus morhua OX=8049 GN=lig1 PE=3 SV=1                                                                  | 4  | 3 | 3 | 3 | 1085 | 120.1 | 6.05  | 6.67  | 3 | 1 |
| -3.4E+18 | IsMasterProtein | A0A8C5BR63 | Protein phosphatase 1 regulatory subunit OS=Gadus morhua OX=8049 GN=zmp:0000001167 PE=4 SV=1                          | 6  | 3 | 3 | 3 | 957  | 105.2 | 6.55  | 7.32  | 3 | 1 |
| -3.4E+18 | IsMasterProtein | A0A8C5AZD4 | G protein-coupled receptor kinase OS=Gadus morhua OX=8049 GN=grk3 PE=3 SV=1                                           | 8  | 3 | 3 | 3 | 688  | 79.4  | 7.52  | 8.17  | 3 | 1 |
| -3.3E+18 | IsMasterProtein | A0A8C5C8C8 | Cracd like a OS=Gadus morhua OX=8049 GN=cracdla PE=4 SV=1                                                             | 4  | 3 | 3 | 3 | 1089 | 117.2 | 7.84  | 7.46  | 3 | 1 |
| -3.3E+18 | IsMasterProtein | A0A8C5CMS2 | Arf-GAP with coiled-coil, ANK repeat and PH domain-containing protein OS=Gadus morhua OX=8049 PE=4 SV=1               | 8  | 3 | 3 | 3 | 793  | 89.2  | 8.28  | 8     | 3 | 1 |
| -3.3E+18 | IsMasterProtein | A0A8C5A2I0 | Zinc finger CCHC domain-containing protein 7-like OS=Gadus morhua OX=8049 GN=LOC11552251 PE=4 SV=1                    | 16 | 3 | 3 | 3 | 497  | 55.9  | 9.25  | 8.74  | 3 | 1 |
| -3.3E+18 | IsMasterProtein | A0A8C5CC43 | Dedicator of cytokinesis 9b OS=Gadus morhua OX=8049 PE=3 SV=1                                                         | 3  | 4 | 4 | 3 | 1899 | 214.6 | 7.81  | 9.59  | 4 | 1 |
| -3.3E+18 | IsMasterProtein | A0A8C5CNN6 | Uncharacterized protein OS=Gadus morhua OX=8049 PE=4 SV=1                                                             | 12 | 9 | 9 | 3 | 1315 | 126.3 | 6.42  | 26.1  | 9 | 1 |
| -3.3E+18 | IsMasterProtein | A0A8C5BB77 | Laminin subunit beta-1-like OS=Gadus morhua OX=8049 GN=LOC115542660 PE=4 SV=1                                         | 5  | 3 | 3 | 3 | 1554 | 169   | 6.14  | 8.38  | 3 | 1 |
| -3.2E+18 | IsMasterProtein | A0A8C5FNY8 | Prominin 1a OS=Gadus morhua OX=8049 PE=3 SV=1                                                                         | 5  | 3 | 4 | 3 | 886  | 97.9  | 6.65  | 13.48 | 3 | 1 |
| -3.2E+18 | IsMasterProtein | A0A8C5CFM3 | Inositol hexakisphosphate and diphosphoinositol-pentakisphosphate kinase OS=Gadus morhua OX=8049 GN=ppip5k2 PE=3 SV=1 | 5  | 3 | 3 | 3 | 1226 | 138.4 | 6.87  | 8.14  | 3 | 1 |
| -3.2E+18 | IsMasterProtein | A0A8C5CPT0 | Calcium homeostasis endoplasmic reticulum protein OS=Gadus morhua OX=8049 GN=cherp PE=4 SV=1                          | 6  | 3 | 3 | 3 | 984  | 110.1 | 8.48  | 8.66  | 3 | 1 |
| -3.2E+18 | IsMasterProtein | A0A8C5AIA1 | Bardet-Biedl syndrome 12 OS=Gadus morhua OX=8049 PE=4 SV=1                                                            | 12 | 3 | 3 | 3 | 698  | 71.2  | 8.05  | 8.67  | 3 | 1 |
| -3.2E+18 | IsMasterProtein | A0A8C5BBG9 | Structure-specific endonuclease subunit SLX4 OS=Gadus morhua OX=8049 PE=3 SV=1                                        | 5  | 3 | 3 | 3 | 1558 | 164   | 5.83  | 9.21  | 3 | 1 |
| -3.1E+18 | IsMasterProtein | A0A8C5FW17 | TBC1 domain family, member 17 OS=Gadus morhua OX=8049 GN=tbc1d17 PE=4 SV=1                                            | 8  | 3 | 3 | 3 | 647  | 73.2  | 5.77  | 8.67  | 3 | 1 |
| -3.1E+18 | IsMasterProtein | A0A8C5A9A8 | Betaine--homocysteine S-methyltransferase 1 OS=Gadus morhua OX=8049 GN=LOC115545185 PE=4 SV=1                         | 7  | 3 | 3 | 3 | 397  | 43.7  | 6.87  | 6.2   | 3 | 1 |
| -3E+18   | IsMasterProtein | A0A8C5BT52 | Fibrillar collagen NC1 domain-containing protein OS=Gadus morhua OX=8049 PE=4 SV=1                                    | 4  | 4 | 5 | 3 | 1531 | 158.8 | 7.59  | 11.72 | 4 | 1 |
| -2.9E+18 | IsMasterProtein | A0A8C5BG93 | Proteasome 26S subunit, ATPase 6 OS=Gadus morhua OX=8049 GN=psmc6 PE=3 SV=1                                           | 10 | 3 | 4 | 3 | 420  | 47.3  | 8.57  | 10.5  | 3 | 1 |
| -2.8E+18 | IsMasterProtein | A0A8C5BFU7 | Fatty acid binding protein 7, brain, a OS=Gadus morhua OX=8049 GN=fabp7a PE=3 SV=1                                    | 33 | 3 | 6 | 3 | 132  | 14.9  | 5.2   | 19.15 | 3 | 1 |
| -2.8E+18 | IsMasterProtein | A0A8C5FNC1 | Sorbin and SH3 domain containing 2a OS=Gadus morhua OX=8049 PE=4 SV=1                                                 | 5  | 3 | 3 | 3 | 1376 | 150.3 | 9.38  | 8.54  | 3 | 1 |
| -2.7E+18 | IsMasterProtein | A0A8C5B2S5 | Uncharacterized protein OS=Gadus morhua OX=8049 PE=3 SV=1                                                             | 2  | 3 | 3 | 3 | 2215 | 248.3 | 5.9   | 6.96  | 3 | 1 |
| -2.6E+18 | IsMasterProtein | A0A8C5C9H9 | RPTOR independent companion of MTOR complex 2 OS=Gadus morhua OX=8049 GN=rictor PE=3 SV=1                             | 2  | 3 | 3 | 3 | 1864 | 206.2 | 7.23  | 7.01  | 3 | 1 |
| -2.6E+18 | IsMasterProtein | A0A8C4ZZ74 | Family with sequence similarity 120C OS=Gadus morhua OX=8049 GN=hsd17b10 PE=3 SV=1                                    | 7  | 5 | 5 | 3 | 1202 | 130.7 | 8.75  | 15.36 | 5 | 1 |
| -2.6E+18 | IsMasterProtein | A0A8C5CW85 | Proteasome subunit alpha type OS=Gadus morhua OX=8049 GN=psma6b PE=3 SV=1                                             | 30 | 4 | 4 | 3 | 149  | 16.5  | 8.56  | 10.66 | 4 | 1 |

|          |                 |            |                                                                                                        |    |   |   |   |      |       |      |       |   |   |
|----------|-----------------|------------|--------------------------------------------------------------------------------------------------------|----|---|---|---|------|-------|------|-------|---|---|
| -2.5E+18 | IsMasterProtein | A0A8C5FQ18 | Ectonucleotide pyrophosphatase/phosphodiesterase 1 OS=Gadus morhua OX=8049 PE=4 SV=1                   | 7  | 3 | 3 | 3 | 821  | 91.1  | 7.64 | 8.27  | 3 | 1 |
| -2.5E+18 | IsMasterProtein | A0A8C5D4W7 | Centrosomal protein 170Aa OS=Gadus morhua OX=8049 GN=cep170aa PE=3 SV=1                                | 5  | 3 | 3 | 3 | 1696 | 179.2 | 8.59 | 8.18  | 3 | 1 |
| -2.5E+18 | IsMasterProtein | A0A8C5FX05 | Laminin subunit alpha 1 OS=Gadus morhua OX=8049 GN=LAMA1 PE=4 SV=1                                     | 3  | 3 | 4 | 3 | 2328 | 249.8 | 6.8  | 9.41  | 3 | 1 |
| -2.4E+18 | IsMasterProtein | A0A8C5A2Y8 | Cell division cycle 42, like OS=Gadus morhua OX=8049 GN=cdc42l PE=4 SV=1                               | 29 | 3 | 3 | 3 | 136  | 14.9  | 7.72 | 8.1   | 3 | 1 |
| -2.4E+18 | IsMasterProtein | A0A8C4ZN08 | Procollagen C-endopeptidase enhancer a OS=Gadus morhua OX=8049 GN=pcolcea PE=4 SV=1                    | 7  | 3 | 3 | 3 | 462  | 50.2  | 9.16 | 8.17  | 3 | 1 |
| -2.4E+18 | IsMasterProtein | A0A8C5BN91 | Suppression of tumorigenicity 7 like OS=Gadus morhua OX=8049 GN=st7l PE=3 SV=1                         | 9  | 3 | 3 | 3 | 513  | 58.3  | 7.71 | 6.76  | 3 | 1 |
| -2.3E+18 | IsMasterProtein | A0A8C5AUG4 | Ferritin OS=Gadus morhua OX=8049 GN=fth1b PE=3 SV=1                                                    | 35 | 3 | 4 | 3 | 177  | 20.5  | 5.59 | 11.1  | 3 | 1 |
| -2.2E+18 | IsMasterProtein | A0A8C5BZP0 | Proteasome activator subunit 2 OS=Gadus morhua OX=8049 GN=PSME2 PE=3 SV=1                              | 15 | 3 | 3 | 3 | 221  | 25    | 5.91 | 8.1   | 3 | 1 |
| -2.2E+18 | IsMasterProtein | A0A8C5FLY2 | Transmembrane and coiled-coil domains 4 OS=Gadus morhua OX=8049 GN=tmco4 PE=3 SV=1                     | 11 | 3 | 6 | 3 | 641  | 68.6  | 5.17 | 13.89 | 3 | 1 |
| -2E+18   | IsMasterProtein | A0A8C5FU00 | FinTRIM family, member 83 OS=Gadus morhua OX=8049 PE=4 SV=1                                            | 12 | 3 | 5 | 3 | 547  | 62.1  | 7.64 | 12.11 | 3 | 1 |
| -1.9E+18 | IsMasterProtein | A0A8C5BPN7 | V-type proton ATPase subunit D OS=Gadus morhua OX=8049 GN=atp6v1d PE=3 SV=1                            | 13 | 3 | 3 | 3 | 262  | 30.1  | 9.63 | 7.05  | 3 | 1 |
| -1.9E+18 | IsMasterProtein | A0A8C5B3I1 | Uncharacterized protein OS=Gadus morhua OX=8049 PE=3 SV=1                                              | 7  | 9 | 9 | 3 | 1929 | 220.7 | 5.72 | 22.67 | 9 | 1 |
| -1.8E+18 | IsMasterProtein | A0A8C5BQV2 | Uncharacterized protein OS=Gadus morhua OX=8049 PE=3 SV=1                                              | 5  | 3 | 3 | 3 | 1273 | 142.9 | 6.35 | 8.67  | 3 | 1 |
| -1.8E+18 | IsMasterProtein | A0A8C5ATB3 | Clathrin light chain OS=Gadus morhua OX=8049 GN=clta PE=3 SV=1                                         | 22 | 3 | 3 | 3 | 204  | 22.4  | 4.45 | 7.59  | 3 | 1 |
| -1.8E+18 | IsMasterProtein | A0A8C4YZJ9 | Integrin, alpha 6a OS=Gadus morhua OX=8049 GN=itga6a PE=3 SV=1                                         | 4  | 3 | 3 | 3 | 1057 | 115.8 | 7.21 | 6.35  | 3 | 1 |
| -1.8E+18 | IsMasterProtein | A0A8C4ZMC6 | ATP-binding cassette, sub-family B (MDR/TAP), member 9 OS=Gadus morhua OX=8049 GN=abcb9 PE=4 SV=1      | 6  | 3 | 3 | 3 | 799  | 86.5  | 6.37 | 6.32  | 3 | 1 |
| -1.7E+18 | IsMasterProtein | A0A8C4Z2F8 | LIM zinc-binding domain-containing protein OS=Gadus morhua OX=8049 PE=4 SV=1                           | 4  | 3 | 3 | 3 | 1668 | 188.2 | 9.23 | 6.81  | 3 | 1 |
| -1.7E+18 | IsMasterProtein | A0A8C5BA02 | Calcium/calmodulin-dependent protein kinase OS=Gadus morhua OX=8049 GN=LOC115530649 PE=3 SV=1          | 16 | 5 | 5 | 3 | 488  | 55.3  | 7.3  | 13.56 | 5 | 1 |
| -1.6E+18 | IsMasterProtein | A0A8C5F9N4 | Transgelin OS=Gadus morhua OX=8049 GN=LOC115547387 PE=3 SV=1                                           | 17 | 3 | 3 | 3 | 201  | 22.1  | 8.22 | 6.69  | 3 | 1 |
| -1.6E+18 | IsMasterProtein | A0A8C5CWS2 | Golgi brefeldin A resistant guanine nucleotide exchange factor 1 OS=Gadus morhua OX=8049 PE=4 SV=1     | 4  | 3 | 3 | 3 | 1795 | 199.4 | 6.13 | 8.67  | 3 | 1 |
| -1.6E+18 | IsMasterProtein | A0A8C5C8I8 | G patch domain containing 8 OS=Gadus morhua OX=8049 PE=4 SV=1                                          | 3  | 3 | 4 | 3 | 1587 | 169.6 | 9.52 | 9.3   | 3 | 1 |
| -1.5E+18 | IsMasterProtein | A0A8C5CSZ6 | Dynein axonemal heavy chain 3 OS=Gadus morhua OX=8049 PE=3 SV=1                                        | 2  | 3 | 3 | 3 | 2966 | 333.7 | 6.23 | 8.4   | 3 | 1 |
| -1.5E+18 | IsMasterProtein | A0A8C5AY65 | Selenium binding protein 1 OS=Gadus morhua OX=8049 PE=3 SV=1                                           | 13 | 3 | 6 | 3 | 455  | 50.7  | 6.21 | 16.74 | 3 | 1 |
| -1.5E+18 | IsMasterProtein | A0A8C4YZC0 | Mitogen-activated protein kinase 8 interacting protein 3 OS=Gadus morhua OX=8049 GN=mapk8ip3 PE=3 SV=1 | 6  | 3 | 3 | 3 | 1340 | 146.4 | 5.34 | 9.1   | 3 | 1 |
| -1.5E+18 | IsMasterProtein | A0A8C5CXJ9 | Peptidase S1 domain-containing protein OS=Gadus morhua OX=8049 PE=4 SV=1                               | 28 | 3 | 3 | 3 | 199  | 21.8  | 8.6  | 9.46  | 3 | 1 |
| -1.4E+18 | IsMasterProtein | A0A8C5F4J1 | Cytochrome c oxidase subunit OS=Gadus morhua OX=8049 GN=LOC115533495 PE=3 SV=1                         | 36 | 3 | 7 | 3 | 85   | 10.1  | 8.18 | 16.31 | 3 | 1 |
| -1.3E+18 | IsMasterProtein | A0A8C4ZTX5 | Coiled-coil domain containing 148 OS=Gadus morhua OX=8049 GN=CCDC148 PE=4 SV=1                         | 4  | 3 | 3 | 3 | 642  | 74.4  | 7.69 | 6.23  | 3 | 1 |
| -1.3E+18 | IsMasterProtein | A0A8C5CG95 | Cofilin 1 OS=Gadus morhua OX=8049 PE=3 SV=1                                                            | 32 | 3 | 3 | 3 | 170  | 19.1  | 7.21 | 6.96  | 3 | 1 |
| -1.2E+18 | IsMasterProtein | A0A8C5BE27 | Flotillin OS=Gadus morhua OX=8049 GN=flot1b PE=3 SV=1                                                  | 7  | 3 | 3 | 3 | 466  | 51.9  | 6.95 | 8.23  | 3 | 1 |
| -1.2E+18 | IsMasterProtein | A0A8C5CQX7 | Sacsin-like OS=Gadus morhua OX=8049 GN=LOC115533144 PE=4 SV=1                                          | 1  | 3 | 3 | 3 | 4247 | 484.2 | 6.7  | 7.04  | 3 | 1 |
| -1.2E+18 | IsMasterProtein | A0A8C4ZPH9 | Desmoplakin b OS=Gadus morhua OX=8049 PE=4 SV=1                                                        | 2  | 3 | 3 | 3 | 2349 | 266.3 | 5.87 | 8.28  | 3 | 1 |
| -1.1E+18 | IsMasterProtein | A0A8C4ZHM4 | Apolipoprotein C-I OS=Gadus morhua OX=8049 GN=apoc1 PE=3 SV=1                                          | 27 | 3 | 3 | 3 | 92   | 10    | 4.77 | 6.48  | 3 | 1 |
| -1.1E+18 | IsMasterProtein | A0A8C5AC14 | Nucleoporin 205 OS=Gadus morhua OX=8049 GN=nup205 PE=3 SV=1                                            | 3  | 3 | 3 | 3 | 1975 | 220.4 | 6.35 | 7.07  | 3 | 1 |
| -1.1E+18 | IsMasterProtein | A0A8C5FU47 | Glutamate receptor OS=Gadus morhua OX=8049 PE=3 SV=1                                                   | 4  | 3 | 3 | 3 | 1471 | 159.8 | 8.22 | 8.46  | 3 | 1 |
| -1.1E+18 | IsMasterProtein | A0A8C5FQC3 | Transcription initiation factor TFIID subunit OS=Gadus morhua OX=8049 PE=3 SV=1                        | 4  | 3 | 3 | 3 | 1871 | 212.6 | 5.63 | 7.93  | 3 | 1 |

|          |                 |             |                                                                                                                                    |    |   |   |   |      |       |       |       |   |   |
|----------|-----------------|-------------|------------------------------------------------------------------------------------------------------------------------------------|----|---|---|---|------|-------|-------|-------|---|---|
| -1E+18   | IsMasterProtein | A0A8C5C5Q8  | ELMO/CED-12 domain containing 3 OS=Gadus morhua OX=8049 GN=elmod3 PE=4 SV=1                                                        | 15 | 3 | 3 | 3 | 472  | 53.1  | 8.46  | 8.06  | 3 | 1 |
| -9E+17   | IsMasterProtein | A0A8C5BUG1  | Nucleoporin 54 OS=Gadus morhua OX=8049 GN=LOC115542882 PE=3 SV=1                                                                   | 6  | 3 | 3 | 3 | 849  | 92.3  | 7.96  | 8.53  | 3 | 1 |
| -8.8E+17 | IsMasterProtein | A0A8C4ZVU2  | Bulb-type lectin domain-containing protein OS=Gadus morhua OX=8049 PE=4 SV=1                                                       | 31 | 3 | 3 | 3 | 110  | 12.7  | 6.54  | 7.18  | 3 | 1 |
| -8.6E+17 | IsMasterProtein | A0A8C5B0X6  | Shroom family member 3 OS=Gadus morhua OX=8049 GN=shroom3 PE=3 SV=1                                                                | 5  | 3 | 3 | 3 | 1627 | 173.7 | 7.65  | 8.95  | 3 | 1 |
| -8.4E+17 | IsMasterProtein | A0A8C5AD19  | Crystallin beta-gamma domain containing 2 OS=Gadus morhua OX=8049 GN=crybg2 PE=3 SV=1                                              | 2  | 3 | 3 | 3 | 2689 | 287.6 | 4.97  | 7.98  | 3 | 1 |
| -8.1E+17 | IsMasterProtein | A0A8C4YY52  | Uncharacterized protein OS=Gadus morhua OX=8049 PE=3 SV=1                                                                          | 21 | 3 | 3 | 3 | 149  | 16.8  | 10.23 | 7.15  | 3 | 1 |
| -7.5E+17 | IsMasterProtein | A0A8C5D057  | Receptor protein-tyrosine kinase OS=Gadus morhua OX=8049 PE=3 SV=1                                                                 | 7  | 3 | 3 | 3 | 819  | 91.6  | 6.77  | 8.03  | 3 | 1 |
| -7.1E+17 | IsMasterProtein | A0A8C4ZD04  | NADH dehydrogenase [ubiquinone] 1 beta subcomplex subunit 10 OS=Gadus morhua OX=8049 GN=NDUFB10 PE=3 SV=1                          | 18 | 3 | 3 | 3 | 169  | 19.9  | 7.66  | 7.28  | 3 | 1 |
| -7.1E+17 | IsMasterProtein | A0A8C5A805  | Elongator complex protein 3 OS=Gadus morhua OX=8049 GN=LOC115538974 PE=3 SV=1                                                      | 10 | 3 | 3 | 3 | 559  | 63.6  | 8.41  | 7.44  | 3 | 1 |
| -6.9E+17 | IsMasterProtein | A0A8C5BHL7  | Oxysterol-binding protein OS=Gadus morhua OX=8049 GN=OSBPL8 PE=3 SV=1                                                              | 8  | 3 | 4 | 3 | 756  | 85.6  | 6.05  | 10.49 | 3 | 1 |
| -6.6E+17 | IsMasterProtein | A0A8C5F6L0  | Putative monooxygenase p33MONOX OS=Gadus morhua OX=8049 GN=LOC115547356 PE=3 SV=1                                                  | 18 | 3 | 3 | 3 | 319  | 34    | 9.31  | 8.31  | 3 | 1 |
| -6.1E+17 | IsMasterProtein | A0A8C5C0K7  | Uncharacterized protein OS=Gadus morhua OX=8049 PE=4 SV=1                                                                          | 4  | 3 | 3 | 3 | 1445 | 165.1 | 8.65  | 7.36  | 3 | 1 |
| -5.7E+17 | IsMasterProtein | A0A8C4ZCY7  | Cerebellar degeneration-related protein 2-like OS=Gadus morhua OX=8049 GN=LOC115529479 PE=3 SV=1                                   | 12 | 3 | 4 | 3 | 472  | 52.4  | 5.81  | 9.97  | 3 | 1 |
| -5.3E+17 | IsMasterProtein | A0A8C5FD72  | Complement C1q and tumor necrosis factor-related protein 9-like OS=Gadus morhua OX=8049 GN=LOC115556822 PE=4 SV=1                  | 12 | 3 | 3 | 3 | 239  | 25.5  | 8.65  | 7.24  | 3 | 1 |
| -4.9E+17 | IsMasterProtein | A0A8C5FSF1  | BCL6 corepressor-like 1 OS=Gadus morhua OX=8049 GN=bcorl1 PE=4 SV=1                                                                | 4  | 3 | 3 | 3 | 1597 | 170.4 | 9.38  | 7.08  | 3 | 1 |
| -4.7E+17 | IsMasterProtein | A0A8C4ZLI7  | Holocarboxylase synthetase (biotin-(propionyl-CoA-carboxylase (ATP-hydrolysing)) ligase) OS=Gadus morhua OX=8049 GN=HLCS PE=3 SV=1 | 9  | 3 | 3 | 3 | 851  | 92.9  | 5.94  | 8.59  | 3 | 1 |
| -4.5E+17 | IsMasterProtein | cRAP_O76011 | Keratin, type I cuticular Ha4 OS=Homo sapiens GN=KRT34 PE=2 SV=2                                                                   | 16 | 6 | 6 | 3 | 436  | 49.4  | 5.06  | 16.11 | 6 | 1 |
| -4.2E+17 | IsMasterProtein | A0A8C4Z7D9  | Uridine 5'-monophosphate synthase OS=Gadus morhua OX=8049 GN=umps PE=3 SV=1                                                        | 12 | 3 | 3 | 3 | 484  | 52.5  | 7.39  | 8.05  | 3 | 1 |
| -3.6E+17 | IsMasterProtein | A0A8C5AQQ4  | Aminopeptidase OS=Gadus morhua OX=8049 PE=3 SV=1                                                                                   | 6  | 3 | 3 | 3 | 985  | 112.9 | 6.6   | 7.52  | 3 | 1 |
| -2.9E+17 | IsMasterProtein | A0A8C5B0V6  | Zgc:158803 OS=Gadus morhua OX=8049 PE=3 SV=1                                                                                       | 12 | 4 | 5 | 3 | 510  | 58.9  | 8.24  | 11.59 | 4 | 1 |
| -2.2E+17 | IsMasterProtein | A0A8C5FDJ8  | Regulating synaptic membrane exocytosis 2 OS=Gadus morhua OX=8049 GN=RIMS2 PE=4 SV=1                                               | 6  | 3 | 3 | 3 | 1250 | 138.4 | 9.32  | 8.5   | 3 | 1 |
| -2.2E+17 | IsMasterProtein | A0A8C5CGI8  | ADP/ATP translocase OS=Gadus morhua OX=8049 GN=slc25a5 PE=3 SV=1                                                                   | 17 | 5 | 6 | 3 | 298  | 32.8  | 9.74  | 14.28 | 5 | 1 |
| -2E+17   | IsMasterProtein | A0A8C5B2C9  | Eukaryotic translation initiation factor 3 subunit F OS=Gadus morhua OX=8049 GN=EIF3F PE=3 SV=1                                    | 10 | 3 | 3 | 3 | 329  | 36.2  | 5.6   | 8.01  | 3 | 1 |
| -1.9E+17 | IsMasterProtein | A0A8C4YW89  | Uncharacterized protein OS=Gadus morhua OX=8049 PE=4 SV=1                                                                          | 6  | 3 | 3 | 3 | 756  | 81.4  | 5.54  | 7.53  | 3 | 1 |
| -1.4E+17 | IsMasterProtein | A0A8C5BLA1  | GATA-type domain-containing protein OS=Gadus morhua OX=8049 PE=4 SV=1                                                              | 9  | 3 | 3 | 3 | 1099 | 118.4 | 7.56  | 7.63  | 3 | 1 |
| -1E+17   | IsMasterProtein | A0A8C4ZQX2  | Coiled-coil domain containing 6 OS=Gadus morhua OX=8049 GN=CCDC6 PE=4 SV=1                                                         | 6  | 3 | 3 | 3 | 530  | 59.6  | 8.65  | 7.91  | 3 | 1 |
| -5.5E+16 | IsMasterProtein | A0A8C5AES5  | 3-hydroxyisobutyrate dehydrogenase OS=Gadus morhua OX=8049 GN=hibadhb PE=3 SV=1                                                    | 15 | 3 | 3 | 3 | 343  | 36.2  | 8.57  | 9.56  | 3 | 1 |
| -6.4E+15 | IsMasterProtein | A0A8C4ZLZ1  | Collagen alpha-1(XVII) chain-like OS=Gadus morhua OX=8049 GN=LOC115560299 PE=4 SV=1                                                | 2  | 3 | 3 | 3 | 1956 | 191.9 | 9.35  | 7.65  | 3 | 1 |
| -5.4E+15 | IsMasterProtein | A0A8C5F9R8  | Uncharacterized protein OS=Gadus morhua OX=8049 PE=4 SV=1                                                                          | 3  | 3 | 3 | 3 | 2843 | 307.8 | 5.27  | 7.78  | 3 | 1 |
| 1.19E+16 | IsMasterProtein | A0A8C5AAS6  | Uncharacterized protein OS=Gadus morhua OX=8049 PE=4 SV=1                                                                          | 2  | 3 | 3 | 3 | 3229 | 351.3 | 6.34  | 7.98  | 3 | 1 |
| 2.9E+16  | IsMasterProtein | A0A8C5BSE6  | StAR-related lipid transfer (START) domain containing 15 OS=Gadus morhua OX=8049 GN=stard15 PE=4 SV=1                              | 13 | 3 | 4 | 3 | 248  | 28.7  | 8.31  | 11.32 | 3 | 1 |
| 3.88E+16 | IsMasterProtein | A0A8C5F789  | Acetyl-CoA acyltransferase 2 OS=Gadus morhua OX=8049 GN=acaa2 PE=3 SV=1                                                            | 12 | 3 | 3 | 3 | 397  | 41.5  | 7.53  | 9.07  | 3 | 1 |
| 5.52E+16 | IsMasterProtein | A0A8C5BE08  | Uncharacterized protein OS=Gadus morhua OX=8049 PE=4 SV=1                                                                          | 9  | 3 | 3 | 3 | 655  | 74.2  | 5.03  | 7.58  | 3 | 1 |

|          |                 |            |                                                                                                   |    |    |    |   |      |       |       |       |    |   |
|----------|-----------------|------------|---------------------------------------------------------------------------------------------------|----|----|----|---|------|-------|-------|-------|----|---|
| 1.86E+17 | IsMasterProtein | A0A8C4ZPY9 | Neurobeachin-like 2 OS=Gadus morhua OX=8049 PE=4 SV=1                                             | 3  | 3  | 4  | 3 | 2554 | 285.9 | 6.95  | 10.7  | 3  | 1 |
| 1.96E+17 | IsMasterProtein | A0A8C4ZC20 | Aminoacidpate-semialdehyde synthase OS=Gadus morhua OX=8049 PE=3 SV=1                             | 4  | 3  | 3  | 3 | 904  | 100.5 | 6.8   | 8.65  | 3  | 1 |
| 2.59E+17 | IsMasterProtein | A0A8C5A812 | Uncharacterized protein OS=Gadus morhua OX=8049 PE=3 SV=1                                         | 3  | 3  | 3  | 3 | 1992 | 217.2 | 7.64  | 7.73  | 3  | 1 |
| 2.85E+17 | IsMasterProtein | A0A8C5FMD1 | Dedicator of cytokinesis 5 OS=Gadus morhua OX=8049 GN=dock5 PE=3 SV=1                             | 3  | 3  | 3  | 3 | 1865 | 213   | 7.27  | 7.6   | 3  | 1 |
| 2.97E+17 | IsMasterProtein | A0A8C5BH31 | Chromobox homolog 4 (Pc class homolog, Drosophila) OS=Gadus morhua OX=8049 GN=cbx4 PE=4 SV=1      | 7  | 3  | 3  | 3 | 566  | 63.2  | 8.43  | 6.19  | 3  | 1 |
| 3.23E+17 | IsMasterProtein | A0A8C5C3V4 | Chromodomain Y like 2 OS=Gadus morhua OX=8049 GN=cdyl2 PE=4 SV=1                                  | 11 | 3  | 4  | 3 | 524  | 58.1  | 9.54  | 9.37  | 3  | 1 |
| 3.46E+17 | IsMasterProtein | A0A8C5B5A5 | Adenylate cyclase OS=Gadus morhua OX=8049 GN=acy7 PE=3 SV=1                                       | 7  | 4  | 4  | 3 | 786  | 88.8  | 8.4   | 9.78  | 4  | 1 |
| 3.54E+17 | IsMasterProtein | A0A8C4ZCH7 | Striated muscle enriched protein kinase b OS=Gadus morhua OX=8049 GN=spegb PE=3 SV=1              | 2  | 3  | 3  | 3 | 3617 | 397.9 | 7.85  | 8.13  | 3  | 1 |
| 3.65E+17 | IsMasterProtein | A0A8C4Z9U2 | Uncharacterized protein OS=Gadus morhua OX=8049 PE=4 SV=1                                         | 11 | 13 | 17 | 3 | 1579 | 175.1 | 5.99  | 45.84 | 13 | 1 |
| 3.73E+17 | IsMasterProtein | A0A8C5F5W6 | Delta-1-pyrroline-5-carboxylate synthase OS=Gadus morhua OX=8049 GN=LOC115560515 PE=3 SV=1        | 9  | 3  | 3  | 3 | 782  | 85.4  | 7.05  | 9.75  | 3  | 1 |
| 4.5E+17  | IsMasterProtein | A0A8C4YVX7 | RNase_Pc domain-containing protein OS=Gadus morhua OX=8049 PE=3 SV=1                              | 27 | 3  | 3  | 3 | 129  | 15    | 8.03  | 8.08  | 3  | 1 |
| 4.6E+17  | IsMasterProtein | A0A8C5FWH0 | Reverse transcriptase domain-containing protein OS=Gadus morhua OX=8049 PE=4 SV=1                 | 7  | 3  | 3  | 3 | 860  | 96.5  | 9.36  | 7.67  | 3  | 1 |
| 5.36E+17 | IsMasterProtein | A0A8C5F4J5 | Proteasome activator subunit 1 OS=Gadus morhua OX=8049 GN=psme1 PE=3 SV=1                         | 15 | 3  | 3  | 3 | 230  | 26.4  | 7.71  | 8     | 3  | 1 |
| 6.93E+17 | IsMasterProtein | A0A8C5D081 | Phosphatidylinositol-3,4-bisphosphate 4-phosphatase OS=Gadus morhua OX=8049 GN=inpp4aa PE=3 SV=1  | 7  | 3  | 3  | 3 | 970  | 108.8 | 8.16  | 8.9   | 3  | 1 |
| 7.32E+17 | IsMasterProtein | A0A8C4ZCM7 | Vacuolar protein sorting-associated protein 28 homolog OS=Gadus morhua OX=8049 GN=vps28 PE=3 SV=1 | 19 | 3  | 3  | 3 | 212  | 24.3  | 5.25  | 7.2   | 3  | 1 |
| 8.55E+17 | IsMasterProtein | A0A8C4Z448 | Isoaspartyl peptidase/L-asparaginase OS=Gadus morhua OX=8049 GN=si:dkkey-103j14.5 PE=3 SV=1       | 14 | 3  | 3  | 3 | 310  | 32.5  | 5.52  | 10.84 | 3  | 1 |
| 9.22E+17 | IsMasterProtein | A0A8C5FPC7 | Tripartite motif containing 36 OS=Gadus morhua OX=8049 GN=trim36 PE=4 SV=1                        | 10 | 3  | 3  | 3 | 583  | 66    | 6.52  | 8.18  | 3  | 1 |
| 9.61E+17 | IsMasterProtein | A0A8C5A3G1 | Uncharacterized protein OS=Gadus morhua OX=8049 PE=4 SV=1                                         | 11 | 3  | 3  | 3 | 236  | 24.9  | 7.91  | 7.86  | 3  | 1 |
| 9.62E+17 | IsMasterProtein | A0A8C4Z2S9 | Uncharacterized protein OS=Gadus morhua OX=8049 PE=3 SV=1                                         | 5  | 3  | 3  | 3 | 1336 | 150.7 | 6.48  | 8.45  | 3  | 1 |
| 9.87E+17 | IsMasterProtein | A0A8C5C4P3 | Neurofibromin 1a OS=Gadus morhua OX=8049 PE=4 SV=1                                                | 3  | 3  | 3  | 3 | 2750 | 309.6 | 7.5   | 8.64  | 3  | 1 |
| 9.92E+17 | IsMasterProtein | A0A8C5BVN5 | SAM domain-containing protein OS=Gadus morhua OX=8049 PE=4 SV=1                                   | 4  | 3  | 3  | 3 | 1560 | 179.7 | 7.77  | 8.19  | 3  | 1 |
| 1.01E+18 | IsMasterProtein | A0A8C5CXT4 | XPGN domain-containing protein OS=Gadus morhua OX=8049 PE=3 SV=1                                  | 15 | 3  | 3  | 3 | 484  | 54    | 7.59  | 9.24  | 3  | 1 |
| 1.04E+18 | IsMasterProtein | A0A8C5AKL5 | RH2 domain-containing protein OS=Gadus morhua OX=8049 PE=4 SV=1                                   | 5  | 3  | 3  | 3 | 915  | 101.5 | 5.6   | 7.37  | 3  | 1 |
| 1.13E+18 | IsMasterProtein | A0A8C5A5D3 | Receptor protein-tyrosine kinase OS=Gadus morhua OX=8049 GN=LOC115557274 PE=4 SV=1                | 7  | 3  | 3  | 3 | 1154 | 127.1 | 6.46  | 8.88  | 3  | 1 |
| 1.19E+18 | IsMasterProtein | A0A8C5AX56 | LisH domain-containing protein OS=Gadus morhua OX=8049 PE=3 SV=1                                  | 4  | 3  | 3  | 3 | 1366 | 153.3 | 7.25  | 7.62  | 3  | 1 |
| 1.26E+18 | IsMasterProtein | A0A8C5AV46 | Solute carrier family 25 member 12 OS=Gadus morhua OX=8049 GN=slc25a12 PE=3 SV=1                  | 5  | 3  | 3  | 3 | 709  | 77.9  | 9.26  | 6.64  | 3  | 1 |
| 1.5E+18  | IsMasterProtein | A0A8C4ZHA0 | Kinesin family member 11 OS=Gadus morhua OX=8049 GN=kif11 PE=3 SV=1                               | 4  | 3  | 3  | 3 | 1019 | 114.7 | 5.73  | 6.67  | 3  | 1 |
| 1.54E+18 | IsMasterProtein | G0XNX7     | Peptidylprolyl isomerase OS=Gadus morhua OX=8049 GN=FKBP-1A PE=2 SV=1                             | 37 | 3  | 4  | 3 | 108  | 11.7  | 7.28  | 12.95 | 3  | 1 |
| 1.6E+18  | IsMasterProtein | A0A8C5F5D4 | Regulator of G protein signaling 14a OS=Gadus morhua OX=8049 PE=4 SV=1                            | 6  | 3  | 3  | 3 | 765  | 80.2  | 9.09  | 7.54  | 3  | 1 |
| 1.66E+18 | IsMasterProtein | A0A8C5AKM5 | Chromobox protein homolog 2-like OS=Gadus morhua OX=8049 GN=LOC115531460 PE=4 SV=1                | 9  | 3  | 3  | 3 | 643  | 66.3  | 10.32 | 7.53  | 3  | 1 |
| 1.74E+18 | IsMasterProtein | A0A8C5C323 | Stromal interaction molecule 2-like OS=Gadus morhua OX=8049 GN=LOC115540702 PE=4 SV=1             | 4  | 3  | 3  | 3 | 970  | 109.3 | 6.95  | 8.32  | 3  | 1 |
| 1.76E+18 | IsMasterProtein | A0A8C5B8H4 | GYF domain-containing protein OS=Gadus morhua OX=8049 PE=4 SV=1                                   | 2  | 3  | 3  | 3 | 1398 | 158.3 | 6.37  | 6.76  | 3  | 1 |
| 1.78E+18 | IsMasterProtein | A0A8C5B957 | Amyloid beta (A4) precursor-like protein 2 OS=Gadus morhua OX=8049 GN=aplp2 PE=3 SV=1             | 6  | 3  | 4  | 3 | 761  | 86.5  | 4.74  | 12.13 | 3  | 1 |
| 1.92E+18 | IsMasterProtein | A0A8C4ZJA5 | Zinc finger FYVE domain-containing protein 26 OS=Gadus morhua OX=8049 PE=4 SV=1                   | 3  | 3  | 3  | 3 | 2450 | 268.4 | 6.6   | 7.73  | 3  | 1 |

|          |                 |            |                                                                                                                         |    |    |    |   |      |       |       |        |    |   |
|----------|-----------------|------------|-------------------------------------------------------------------------------------------------------------------------|----|----|----|---|------|-------|-------|--------|----|---|
| 1.92E+18 | IsMasterProtein | A0A8C5CVZ6 | Signal transducer and activator of transcription OS=Gadus morhua OX=8049 GN=stat5a PE=3 SV=1                            | 10 | 3  | 3  | 3 | 762  | 87    | 6.65  | 8.22   | 3  | 1 |
| 1.93E+18 | IsMasterProtein | A0A8C5FK52 | Lipoxygenase homology domains 1b OS=Gadus morhua OX=8049 PE=4 SV=1                                                      | 4  | 3  | 3  | 3 | 2227 | 251.1 | 5.36  | 7.84   | 3  | 1 |
| 2.02E+18 | IsMasterProtein | A0A8C5F8D5 | Serine and arginine rich splicing factor 6b OS=Gadus morhua OX=8049 PE=4 SV=1                                           | 11 | 3  | 3  | 3 | 281  | 32    | 11.84 | 7      | 3  | 1 |
| 2.05E+18 | IsMasterProtein | A0A8C5CQP8 | Chromosome 8 C7orf25 homolog OS=Gadus morhua OX=8049 GN=c8h7orf25 PE=3 SV=1                                             | 13 | 3  | 3  | 3 | 457  | 50.5  | 4.79  | 8.17   | 3  | 1 |
| 2.06E+18 | IsMasterProtein | A0A8C5D1A5 | Anillin, actin binding protein OS=Gadus morhua OX=8049 GN=ANLN PE=4 SV=1                                                | 3  | 3  | 3  | 3 | 1246 | 134.3 | 8.97  | 7.28   | 3  | 1 |
| 2.11E+18 | IsMasterProtein | A0A8C5CW46 | 26S proteasome non-ATPase regulatory subunit 11B OS=Gadus morhua OX=8049 GN=LOC115538937 PE=3 SV=1                      | 9  | 3  | 3  | 3 | 467  | 52.3  | 7.28  | 7.93   | 3  | 1 |
| 2.11E+18 | IsMasterProtein | A0A8C5FUF8 | Myelin protein zero OS=Gadus morhua OX=8049 GN=mpz PE=4 SV=1                                                            | 12 | 3  | 4  | 3 | 213  | 23.7  | 9.45  | 10.69  | 3  | 1 |
| 2.11E+18 | IsMasterProtein | A0A8C5FS31 | Coiled-coil domain containing 105 OS=Gadus morhua OX=8049 PE=4 SV=1                                                     | 12 | 3  | 3  | 3 | 426  | 47.9  | 9.69  | 7.47   | 3  | 1 |
| 2.14E+18 | IsMasterProtein | A0A8C5CW64 | Uncharacterized protein OS=Gadus morhua OX=8049 PE=4 SV=1                                                               | 10 | 5  | 5  | 3 | 1146 | 129.1 | 5.66  | 13.44  | 5  | 1 |
| 2.15E+18 | IsMasterProtein | A0A8C4YZ60 | ATP synthase subunit beta OS=Gadus morhua OX=8049 GN=LOC115533330 PE=3 SV=1                                             | 57 | 23 | 52 | 3 | 519  | 55.7  | 5.19  | 174.12 | 23 | 1 |
| 2.15E+18 | IsMasterProtein | A0A8C4ZG57 | Roundabout, axon guidance receptor, homolog 2 (Drosophila) OS=Gadus morhua OX=8049 GN=robo2 PE=4 SV=1                   | 5  | 3  | 3  | 3 | 1185 | 127.9 | 8.06  | 6.61   | 3  | 1 |
| 2.16E+18 | IsMasterProtein | A0A8C5ARL4 | Neprilysin OS=Gadus morhua OX=8049 GN=MME PE=4 SV=1                                                                     | 4  | 3  | 3  | 3 | 768  | 87.5  | 5.95  | 7.26   | 3  | 1 |
| 2.24E+18 | IsMasterProtein | A0A8C4Z4T0 | LIM domain only 4a OS=Gadus morhua OX=8049 GN=Imo4a PE=4 SV=1                                                           | 22 | 3  | 3  | 3 | 193  | 20.7  | 8.4   | 8.4    | 3  | 1 |
| 2.28E+18 | IsMasterProtein | A0A8C4Z561 | Epithelial cell adhesion molecule OS=Gadus morhua OX=8049 GN=epcam PE=3 SV=1                                            | 8  | 3  | 3  | 3 | 308  | 34.8  | 7.05  | 6.89   | 3  | 1 |
| 2.3E+18  | IsMasterProtein | A0A8C5B3V8 | Rho GTPase activating protein 21 OS=Gadus morhua OX=8049 GN=arhgap21 PE=4 SV=1                                          | 3  | 3  | 3  | 3 | 2020 | 214.7 | 8.57  | 8.83   | 3  | 1 |
| 2.4E+18  | IsMasterProtein | A0A8C5AM92 | Transient receptor potential cation channel subfamily M member 1-like OS=Gadus morhua OX=8049 GN=LOC115550405 PE=4 SV=1 | 3  | 3  | 4  | 3 | 1777 | 199.1 | 6.86  | 10.47  | 3  | 1 |
| 2.44E+18 | IsMasterProtein | A0A8C5C3C0 | Polypeptide N-acetylgalactosaminyltransferase OS=Gadus morhua OX=8049 GN=GALNT10 PE=3 SV=1                              | 8  | 3  | 3  | 3 | 596  | 67.7  | 8.32  | 7.36   | 3  | 1 |
| 2.62E+18 | IsMasterProtein | A0A8C4Z999 | Target of myb1 membrane trafficking protein OS=Gadus morhua OX=8049 GN=tom1 PE=3 SV=1                                   | 15 | 3  | 3  | 3 | 472  | 52.4  | 5.01  | 8.29   | 3  | 1 |
| 2.7E+18  | IsMasterProtein | A0A8C5CEN6 | PH domain-containing protein OS=Gadus morhua OX=8049 PE=4 SV=1                                                          | 2  | 3  | 6  | 3 | 1225 | 135.4 | 7.3   | 12.91  | 3  | 1 |
| 2.72E+18 | IsMasterProtein | A0A8C4ZQH1 | Lysyl oxidase homolog OS=Gadus morhua OX=8049 PE=3 SV=1                                                                 | 13 | 3  | 3  | 3 | 462  | 51.1  | 8.4   | 7.38   | 3  | 1 |
| 2.74E+18 | IsMasterProtein | A0A8C4Z667 | Carnitine palmitoyltransferase 2 OS=Gadus morhua OX=8049 GN=cpt2 PE=3 SV=1                                              | 6  | 3  | 3  | 3 | 663  | 74.2  | 7.18  | 7.97   | 3  | 1 |
| 2.77E+18 | IsMasterProtein | A0A8C5FVC8 | Lymphocyte antigen 75 OS=Gadus morhua OX=8049 GN=ly75 PE=4 SV=1                                                         | 4  | 3  | 3  | 3 | 1757 | 196.1 | 6.58  | 8.56   | 3  | 1 |
| 2.79E+18 | IsMasterProtein | A0A8C5BRT6 | Histone-lysine N-methyltransferase, H3 lysine-79 specific OS=Gadus morhua OX=8049 GN=dot11 PE=3 SV=1                    | 7  | 3  | 3  | 3 | 1269 | 137.1 | 8.87  | 9.74   | 3  | 1 |
| 2.8E+18  | IsMasterProtein | A0A8C5AB80 | PH domain-containing protein OS=Gadus morhua OX=8049 PE=4 SV=1                                                          | 2  | 3  | 4  | 3 | 2133 | 233.8 | 6.09  | 7.2    | 3  | 1 |
| 2.82E+18 | IsMasterProtein | A0A8C5A1M8 | Zinc phosphodiesterase ELAC protein 2 OS=Gadus morhua OX=8049 GN=elac2 PE=3 SV=1                                        | 8  | 3  | 3  | 3 | 810  | 90.2  | 7.66  | 8.68   | 3  | 1 |
| 2.85E+18 | IsMasterProtein | A0A8C5CU29 | Microtubule-associated protein 1Ab OS=Gadus morhua OX=8049 GN=map1ab PE=4 SV=1                                          | 1  | 3  | 3  | 3 | 4191 | 459.8 | 4.7   | 8.07   | 3  | 1 |
| 2.92E+18 | IsMasterProtein | A0A8C4YZ87 | Outer dynein arm docking complex subunit 1 OS=Gadus morhua OX=8049 GN=odad1 PE=4 SV=1                                   | 11 | 4  | 5  | 3 | 564  | 65.2  | 5.64  | 13.61  | 4  | 1 |
| 3.11E+18 | IsMasterProtein | A0A8C5C590 | FH2 domain-containing protein 1-like OS=Gadus morhua OX=8049 GN=LOC115529136 PE=4 SV=1                                  | 5  | 3  | 3  | 3 | 1190 | 125.1 | 9.86  | 7.23   | 3  | 1 |
| 3.19E+18 | IsMasterProtein | A0A8C5FUB5 | RRM domain-containing protein OS=Gadus morhua OX=8049 PE=4 SV=1                                                         | 11 | 3  | 3  | 3 | 285  | 32.9  | 12.02 | 7.58   | 3  | 1 |
| 3.24E+18 | IsMasterProtein | A0A8C5C2X7 | Oxysterol-binding protein OS=Gadus morhua OX=8049 PE=3 SV=1                                                             | 10 | 4  | 4  | 3 | 701  | 78.3  | 7.12  | 11.16  | 4  | 1 |
| 3.31E+18 | IsMasterProtein | A0A8C5CF59 | Innate immunity activator b OS=Gadus morhua OX=8049 GN=inavab PE=4 SV=1                                                 | 7  | 3  | 3  | 3 | 995  | 108.7 | 8.25  | 7.85   | 3  | 1 |
| 3.36E+18 | IsMasterProtein | A0A8C5A8G4 | Membrane metallo-endopeptidase-like 1 OS=Gadus morhua OX=8049 GN=mmel1 PE=4 SV=1                                        | 6  | 3  | 3  | 3 | 769  | 88.1  | 5.47  | 8.43   | 3  | 1 |
| 3.5E+18  | IsMasterProtein | A0A8C4ZSM3 | Brevican core protein-like OS=Gadus morhua OX=8049 GN=LOC115536066 PE=4 SV=1                                            | 4  | 4  | 4  | 3 | 1343 | 144.4 | 4.83  | 9.27   | 4  | 1 |



|          |                 |            |                                                                                                               |    |   |   |   |      |       |       |       |   |   |
|----------|-----------------|------------|---------------------------------------------------------------------------------------------------------------|----|---|---|---|------|-------|-------|-------|---|---|
| 3.7E+18  | IsMasterProtein | A0A8C4ZY82 | HECT-type E3 ubiquitin transferase OS=Gadus morhua OX=8049<br>GN=NEDD4 PE=4 SV=1                              | 9  | 3 | 5 | 3 | 717  | 82.4  | 6.28  | 13.92 | 3 | 1 |
| 3.71E+18 | IsMasterProtein | A0A8C4ZVT1 | Filamin A interacting protein 1 OS=Gadus morhua OX=8049 GN=FILIP1<br>PE=4 SV=1                                | 7  | 3 | 3 | 3 | 1014 | 115.2 | 7.71  | 7.99  | 3 | 1 |
| 3.71E+18 | IsMasterProtein | A0A8C5BXQ9 | Dishevelled binding antagonist of beta catenin 1 OS=Gadus morhua OX=8049<br>GN=DACT1 PE=3 SV=1                | 11 | 3 | 3 | 3 | 802  | 82.9  | 10.48 | 7.92  | 3 | 1 |
| 3.71E+18 | IsMasterProtein | A0A8C5C3Q1 | 1-phosphatidylinositol-3-phosphate 5-kinase OS=Gadus morhua OX=8049<br>PE=4 SV=1                              | 2  | 3 | 3 | 3 | 2254 | 252.6 | 6.02  | 6.6   | 3 | 1 |
| 3.72E+18 | IsMasterProtein | A0A8C4ZKE9 | ATP synthase subunit d, mitochondrial OS=Gadus morhua OX=8049<br>GN=atp5pd PE=3 SV=1                          | 23 | 3 | 3 | 3 | 161  | 18.1  | 7.4   | 9.23  | 3 | 1 |
| 3.73E+18 | IsMasterProtein | A0A8C5CJ31 | FACT complex subunit OS=Gadus morhua OX=8049 GN=supt16h PE=3<br>SV=1                                          | 6  | 3 | 4 | 3 | 1024 | 116.4 | 5.41  | 9.78  | 3 | 1 |
| 3.93E+18 | IsMasterProtein | A0A8C5A8D5 | Mitogen-activated protein kinase kinase kinase 5-like OS=Gadus morhua<br>OX=8049 GN=si:ch211-1i11.3 PE=3 SV=1 | 5  | 3 | 3 | 3 | 1294 | 143   | 6.6   | 7.39  | 3 | 1 |
| 3.95E+18 | IsMasterProtein | A0A8C4ZAJ2 | Ubiquitin carboxyl-terminal hydrolase OS=Gadus morhua OX=8049 PE=3<br>SV=1                                    | 5  | 3 | 3 | 3 | 870  | 97.2  | 7.62  | 7.24  | 3 | 1 |
| 3.99E+18 | IsMasterProtein | A0A8C5C8J9 | Uncharacterized LOC115542030 OS=Gadus morhua OX=8049<br>GN=zgc:162472 PE=4 SV=1                               | 2  | 3 | 3 | 3 | 2180 | 231.2 | 5.17  | 7.26  | 3 | 1 |
| 4.1E+18  | IsMasterProtein | A0A8C5CP60 | DENN domain containing 4A OS=Gadus morhua OX=8049 GN=DENND4A<br>PE=4 SV=1                                     | 3  | 3 | 3 | 3 | 1909 | 207   | 6.6   | 8.32  | 3 | 1 |
| 4.11E+18 | IsMasterProtein | A0A8C5FFN9 | Talin 2b OS=Gadus morhua OX=8049 GN=tln2b PE=4 SV=1                                                           | 5  | 3 | 4 | 3 | 1781 | 187.2 | 5.53  | 11.3  | 3 | 1 |
| 4.12E+18 | IsMasterProtein | A0A8C5BJR9 | Uncharacterized protein OS=Gadus morhua OX=8049 PE=4 SV=1                                                     | 4  | 3 | 4 | 3 | 1452 | 160.3 | 8.73  | 11.41 | 3 | 1 |
| 4.18E+18 | IsMasterProtein | A0A8C4Z9D0 | Proteasome 26S subunit, ATPase 1b OS=Gadus morhua OX=8049<br>GN=psmc1b PE=3 SV=1                              | 10 | 3 | 3 | 3 | 440  | 49.2  | 6.21  | 7.04  | 3 | 1 |
| 4.23E+18 | IsMasterProtein | A0A8C4ZSX3 | IQ motif containing GTPase activating protein 3 OS=Gadus morhua OX=8049<br>GN=iqgap3 PE=4 SV=1                | 2  | 3 | 3 | 3 | 1613 | 183.5 | 8.78  | 7.29  | 3 | 1 |
| 4.24E+18 | IsMasterProtein | A0A8C5CX10 | Protein-tyrosine-phosphatase OS=Gadus morhua OX=8049 PE=3 SV=1                                                | 4  | 3 | 3 | 3 | 1452 | 163.4 | 6.79  | 7.71  | 3 | 1 |
| 4.25E+18 | IsMasterProtein | A0A8C5F684 | Lipocalin-like OS=Gadus morhua OX=8049 GN=LOC115537335 PE=3 SV=1                                              | 28 | 3 | 4 | 3 | 183  | 19.9  | 5.76  | 12.95 | 3 | 1 |
| 4.26E+18 | IsMasterProtein | A0A8C4Z777 | U6 snRNA-associated Sm-like protein LSM4 OS=Gadus morhua OX=8049<br>GN=LSM4 PE=3 SV=1                         | 29 | 3 | 3 | 3 | 146  | 16    | 9.99  | 8.05  | 3 | 1 |
| 4.27E+18 | IsMasterProtein | A0A8C4ZLK7 | Uncharacterized protein OS=Gadus morhua OX=8049 PE=4 SV=1                                                     | 5  | 3 | 3 | 3 | 847  | 97.6  | 8.97  | 7.23  | 3 | 1 |
| 4.32E+18 | IsMasterProtein | A0A8C4YUG4 | Tetraspanin OS=Gadus morhua OX=8049 GN=cd9 PE=3 SV=1                                                          | 18 | 3 | 4 | 3 | 221  | 24.1  | 6.71  | 12.61 | 3 | 1 |
| 4.35E+18 | IsMasterProtein | A0A8C5C238 | Tudor domain-containing protein 3 OS=Gadus morhua OX=8049 GN=TDRD3<br>PE=4 SV=1                               | 6  | 3 | 3 | 3 | 861  | 94    | 9.45  | 7.64  | 3 | 1 |
| 4.41E+18 | IsMasterProtein | A0A8C5C2E8 | PIPK domain-containing protein OS=Gadus morhua OX=8049 PE=4 SV=1                                              | 12 | 3 | 3 | 3 | 430  | 48.9  | 8.07  | 7.47  | 3 | 1 |
| 4.47E+18 | IsMasterProtein | A0A8C5FTC6 | Ran GTPase activating protein 1 OS=Gadus morhua OX=8049<br>GN=RANGAP1 PE=4 SV=1                               | 8  | 3 | 3 | 3 | 550  | 59.6  | 4.58  | 9.43  | 3 | 1 |
| 4.52E+18 | IsMasterProtein | A0A8C5BMP8 | Dolichyl-diphosphooligosaccharide--protein glycotransferase OS=Gadus<br>morhua OX=8049 GN=STT3B PE=3 SV=1     | 5  | 3 | 3 | 3 | 804  | 91.1  | 9.06  | 7.72  | 3 | 1 |
| 4.72E+18 | IsMasterProtein | A0A8C4ZQ07 | FAT atypical cadherin 2 OS=Gadus morhua OX=8049 GN=fat2 PE=4 SV=1                                             | 1  | 3 | 3 | 3 | 4344 | 477   | 5.1   | 6.84  | 3 | 1 |
| 4.73E+18 | IsMasterProtein | A0A8C5F7Q4 | Growth/differentiation factor 8 OS=Gadus morhua OX=8049 GN=mnstnb PE=3<br>SV=1                                | 8  | 3 | 3 | 3 | 374  | 42.2  | 6.1   | 8.1   | 3 | 1 |
| 4.75E+18 | IsMasterProtein | A0A8C5D1H7 | Nipsnap homolog 2 OS=Gadus morhua OX=8049 PE=3 SV=1                                                           | 18 | 4 | 5 | 3 | 327  | 38.4  | 9.26  | 12.77 | 4 | 1 |
| 4.76E+18 | IsMasterProtein | A0A8C5C1G8 | alpha-1,2-Mannosidase OS=Gadus morhua OX=8049 GN=man1b1a PE=3<br>SV=1                                         | 6  | 3 | 5 | 3 | 697  | 78.4  | 6.51  | 12.45 | 3 | 1 |
| 4.77E+18 | IsMasterProtein | A0A8C5BCU3 | Ig-like domain-containing protein OS=Gadus morhua OX=8049 PE=4 SV=1                                           | 28 | 3 | 3 | 3 | 162  | 18.5  | 9.35  | 8.62  | 3 | 1 |
| 4.79E+18 | IsMasterProtein | A0A8C5FI03 | 26S proteasome regulatory subunit 6A-B OS=Gadus morhua OX=8049<br>GN=LOC115542193 PE=3 SV=1                   | 10 | 3 | 3 | 3 | 428  | 47.9  | 5.94  | 7.69  | 3 | 1 |
| 4.81E+18 | IsMasterProtein | A0A8C5FXX6 | Tyrosine-protein kinase OS=Gadus morhua OX=8049 PE=3 SV=1                                                     | 12 | 4 | 8 | 3 | 474  | 54    | 7.61  | 18.56 | 4 | 1 |
| 4.86E+18 | IsMasterProtein | A0A8C5CZM1 | WD repeat-containing protein 89 OS=Gadus morhua OX=8049 GN=wdr89<br>PE=4 SV=1                                 | 11 | 3 | 3 | 3 | 448  | 45.7  | 5.95  | 7.37  | 3 | 1 |
| 4.87E+18 | IsMasterProtein | A0A8C5BZV4 | Nucleolar and coiled-body phosphoprotein 1 OS=Gadus morhua OX=8049<br>GN=nolc1 PE=4 SV=1                      | 4  | 3 | 3 | 3 | 963  | 96.5  | 8.66  | 6.52  | 3 | 1 |
| 4.95E+18 | IsMasterProtein | A0A8C5ANV3 | Serine/arginine repetitive matrix 2 OS=Gadus morhua OX=8049 GN=srrm2<br>PE=4 SV=1                             | 5  | 3 | 3 | 3 | 1266 | 139.9 | 11.24 | 7.98  | 3 | 1 |



|          |                 |            |                                                                                                         |    |    |    |   |      |       |       |       |    |   |
|----------|-----------------|------------|---------------------------------------------------------------------------------------------------------|----|----|----|---|------|-------|-------|-------|----|---|
| 4.97E+18 | IsMasterProtein | A0A8C5BHE7 | S100 calcium binding protein A10b OS=Gadus morhua OX=8049<br>GN=s100a10b PE=4 SV=1                      | 17 | 3  | 3  | 3 | 157  | 17.4  | 9.51  | 8.53  | 3  | 1 |
| 5.01E+18 | IsMasterProtein | A0A8C5BII7 | Neuralized E3 ubiquitin protein ligase 4 OS=Gadus morhua OX=8049<br>GN=neur14 PE=4 SV=1                 | 3  | 3  | 3  | 3 | 1507 | 161.4 | 6.43  | 7.28  | 3  | 1 |
| 5.16E+18 | IsMasterProtein | A0A8C4ZRG6 | 60S ribosomal protein L18a OS=Gadus morhua OX=8049 GN=rpl18a PE=3<br>SV=1                               | 16 | 3  | 3  | 3 | 176  | 20.6  | 11.03 | 7.09  | 3  | 1 |
| 5.19E+18 | IsMasterProtein | A0A8C5AJ67 | Carbonic anhydrase OS=Gadus morhua OX=8049 GN=LOC115542205 PE=3<br>SV=1                                 | 13 | 3  | 5  | 3 | 315  | 34.8  | 6.11  | 16.01 | 3  | 1 |
| 5.29E+18 | IsMasterProtein | A0A8C4ZD84 | Creatine kinase OS=Gadus morhua OX=8049 GN=ckbb PE=3 SV=1                                               | 14 | 3  | 3  | 3 | 381  | 42.8  | 5.6   | 10.32 | 3  | 1 |
| 5.36E+18 | IsMasterProtein | A0A8C4ZUE8 | 40S ribosomal protein S12 OS=Gadus morhua OX=8049 GN=tps12 PE=3<br>SV=1                                 | 35 | 3  | 3  | 3 | 132  | 14.4  | 7.24  | 7.84  | 3  | 1 |
| 5.38E+18 | IsMasterProtein | A0A8C5ASS5 | Coiled-coil domain containing 30 OS=Gadus morhua OX=8049 GN=ccdc30<br>PE=4 SV=1                         | 5  | 3  | 3  | 3 | 1274 | 145.4 | 6.02  | 7.98  | 3  | 1 |
| 5.43E+18 | IsMasterProtein | A0A8C4ZAD8 | Collagen, type V, alpha 3a OS=Gadus morhua OX=8049 PE=4 SV=1                                            | 6  | 3  | 3  | 3 | 1488 | 156.5 | 6.47  | 8.16  | 3  | 1 |
| 5.45E+18 | IsMasterProtein | A0A8C4YZR8 | Inter-alpha-trypsin inhibitor heavy chain family member 6 OS=Gadus morhua<br>OX=8049 GN=itih6 PE=3 SV=1 | 4  | 3  | 3  | 3 | 1265 | 137   | 9.23  | 11.15 | 3  | 1 |
| 5.46E+18 | IsMasterProtein | A0A8C5B681 | Filament_head and Filament domain-containing protein OS=Gadus morhua<br>OX=8049 GN=zgc:172323 PE=4 SV=1 | 7  | 3  | 3  | 3 | 959  | 94.5  | 6.15  | 6.95  | 3  | 1 |
| 5.57E+18 | IsMasterProtein | A0A8C5FPF8 | Pre-mRNA-processing factor 39-like OS=Gadus morhua OX=8049<br>GN=si:ch211-114c17.1 PE=4 SV=1            | 6  | 3  | 3  | 3 | 737  | 82.6  | 5.01  | 9.07  | 3  | 1 |
| 5.58E+18 | IsMasterProtein | A0A8C5BI96 | Zinc finger homeobox 4 OS=Gadus morhua OX=8049 GN=zfhx4 PE=4 SV=1                                       | 2  | 4  | 4  | 3 | 3824 | 418.6 | 6.92  | 10.39 | 4  | 1 |
| 5.65E+18 | IsMasterProtein | A0A8C5AE58 | Fibulin 2 OS=Gadus morhua OX=8049 GN=FBLN2 PE=3 SV=1                                                    | 5  | 3  | 3  | 3 | 1088 | 119.2 | 6.34  | 8.75  | 3  | 1 |
| 5.68E+18 | IsMasterProtein | A0A8C4ZAI5 | Chondroitin sulfate proteoglycan 4 OS=Gadus morhua OX=8049 PE=4 SV=1                                    | 2  | 3  | 3  | 3 | 2326 | 256.4 | 5.02  | 7.1   | 3  | 1 |
| 5.7E+18  | IsMasterProtein | A0A8C5F4C3 | Bromodomain and PHD finger containing, 3a OS=Gadus morhua OX=8049<br>GN=brpf3a PE=4 SV=1                | 6  | 3  | 4  | 3 | 1233 | 136.3 | 8.9   | 11.51 | 3  | 1 |
| 5.76E+18 | IsMasterProtein | A0A8C4Z8B4 | 26S proteasome non-ATPase regulatory subunit 13 OS=Gadus morhua<br>OX=8049 GN=psmd13 PE=3 SV=1          | 13 | 3  | 3  | 3 | 396  | 45.4  | 5.55  | 8.51  | 3  | 1 |
| 5.81E+18 | IsMasterProtein | A0A8C5F7L2 | Zinc finger, ZZ-type with EF hand domain 1 OS=Gadus morhua OX=8049<br>PE=4 SV=1                         | 3  | 3  | 3  | 3 | 2998 | 331.9 | 5.69  | 8.39  | 3  | 1 |
| 5.82E+18 | IsMasterProtein | A0A8C5B6Q8 | NHS actin remodeling regulator OS=Gadus morhua OX=8049 GN=nhs PE=3<br>SV=1                              | 5  | 3  | 4  | 3 | 1300 | 137.4 | 5.14  | 10.89 | 3  | 1 |
| 5.83E+18 | IsMasterProtein | A0A8C5CX51 | Uncharacterized protein OS=Gadus morhua OX=8049 PE=3 SV=1                                               | 30 | 4  | 5  | 3 | 301  | 33.1  | 5.67  | 20.72 | 4  | 1 |
| 5.85E+18 | IsMasterProtein | A0A8C5FI35 | Uncharacterized protein OS=Gadus morhua OX=8049 PE=3 SV=1                                               | 2  | 3  | 3  | 3 | 2037 | 234.6 | 7.12  | 8.2   | 3  | 1 |
| 5.88E+18 | IsMasterProtein | A0A8C5A0G1 | Programmed cell death 11 OS=Gadus morhua OX=8049 PE=4 SV=1                                              | 5  | 3  | 3  | 3 | 886  | 95.8  | 8.51  | 7.76  | 3  | 1 |
| 5.88E+18 | IsMasterProtein | A0A8C4ZBT7 | Family with sequence similarity 83 member Fa OS=Gadus morhua OX=8049<br>PE=3 SV=1                       | 8  | 3  | 5  | 3 | 603  | 65.3  | 7.78  | 11.35 | 3  | 1 |
| 5.94E+18 | IsMasterProtein | A0A8C4ZJE1 | 14-3-3 protein beta/alpha-like OS=Gadus morhua OX=8049<br>GN=LOC115534522 PE=3 SV=1                     | 18 | 5  | 7  | 3 | 254  | 28.6  | 4.73  | 18.81 | 5  | 1 |
| 5.97E+18 | IsMasterProtein | A0A8C4ZJ33 | Collagen, type I, alpha 2 OS=Gadus morhua OX=8049 PE=4 SV=1                                             | 16 | 9  | 11 | 3 | 1270 | 118.6 | 9.04  | 32.13 | 9  | 1 |
| 6.05E+18 | IsMasterProtein | A0A8C5B335 | Low density lipoprotein receptor-related protein 2a OS=Gadus morhua<br>OX=8049 PE=3 SV=1                | 4  | 13 | 19 | 3 | 4495 | 496.3 | 5.1   | 44.18 | 13 | 1 |
| 6.09E+18 | IsMasterProtein | A0A8C4Z1T0 | GTP:AMP phosphotransferase AK3, mitochondrial OS=Gadus morhua<br>OX=8049 GN=ak3 PE=3 SV=1               | 16 | 3  | 3  | 3 | 216  | 24.1  | 8.62  | 7.75  | 3  | 1 |
| 6.15E+18 | IsMasterProtein | A0A8C5BZY4 | Activity-dependent neuroprotector homeobox b OS=Gadus morhua OX=8049<br>GN=adnpb PE=4 SV=1              | 6  | 3  | 3  | 3 | 1086 | 117.1 | 8.88  | 8.28  | 3  | 1 |
| 6.17E+18 | IsMasterProtein | A0A8C4ZUD5 | Mannosidase, alpha, class 2C, member 1 OS=Gadus morhua OX=8049<br>GN=man2c1 PE=3 SV=1                   | 9  | 3  | 3  | 3 | 922  | 104.4 | 6.35  | 9.06  | 3  | 1 |
| 6.27E+18 | IsMasterProtein | A0A8C4ZDU4 | Proteasome inhibitor PI31 subunit OS=Gadus morhua OX=8049 GN=psmf1<br>PE=3 SV=1                         | 26 | 3  | 3  | 3 | 269  | 29.2  | 5.2   | 9.06  | 3  | 1 |
| 6.37E+18 | IsMasterProtein | A0A8C4Z2I8 | Glutamate receptor OS=Gadus morhua OX=8049 GN=GRIK3 PE=3 SV=1                                           | 10 | 3  | 3  | 3 | 870  | 98    | 8.06  | 8.41  | 3  | 1 |
| 6.41E+18 | IsMasterProtein | A0A8C5CLP4 | Sodium/potassium-transporting ATPase subunit beta OS=Gadus morhua<br>OX=8049 PE=3 SV=1                  | 14 | 3  | 3  | 3 | 302  | 34.5  | 8.91  | 9.14  | 3  | 1 |
| 6.46E+18 | IsMasterProtein | A0A8C5BYH9 | PDZ domain-containing protein OS=Gadus morhua OX=8049 PE=4 SV=1                                         | 3  | 3  | 3  | 3 | 1617 | 178.7 | 5.78  | 7.44  | 3  | 1 |
| 6.5E+18  | IsMasterProtein | A0A8C5AZX1 | Protein S100 OS=Gadus morhua OX=8049 GN=s100a10a PE=3 SV=1                                              | 25 | 3  | 4  | 3 | 101  | 11.3  | 5.53  | 11.65 | 3  | 1 |

|          |                 |            |                                                                                                                  |    |    |    |   |      |       |      |       |    |   |
|----------|-----------------|------------|------------------------------------------------------------------------------------------------------------------|----|----|----|---|------|-------|------|-------|----|---|
| 6.55E+18 | IsMasterProtein | A0A8C5FKM5 | Transient receptor potential cation channel, subfamily M, member 7<br>OS=Gadus morhua OX=8049 GN=trpm7 PE=4 SV=1 | 4  | 3  | 3  | 3 | 1576 | 175.3 | 8.31 | 7.85  | 3  | 1 |
| 6.57E+18 | IsMasterProtein | A0A8C4ZXA2 | Non-specific serine/threonine protein kinase OS=Gadus morhua OX=8049<br>GN=haspin PE=4 SV=1                      | 5  | 3  | 3  | 3 | 1201 | 130.2 | 6.98 | 7.45  | 3  | 1 |
| 6.59E+18 | IsMasterProtein | A0A8C5CLZ8 | C2H2-type domain-containing protein OS=Gadus morhua OX=8049 PE=4<br>SV=1                                         | 7  | 3  | 3  | 3 | 827  | 91.8  | 9.17 | 7.93  | 3  | 1 |
| 6.76E+18 | IsMasterProtein | A0A8C5CA22 | Zinc finger CCCH-type containing 6 OS=Gadus morhua OX=8049 PE=4<br>SV=1                                          | 6  | 3  | 3  | 3 | 987  | 107.6 | 8.38 | 8.19  | 3  | 1 |
| 6.84E+18 | IsMasterProtein | A0A8C4YVE7 | ATP synthase subunit s, mitochondrial OS=Gadus morhua OX=8049 PE=3<br>SV=1                                       | 20 | 3  | 3  | 3 | 177  | 20    | 7.01 | 6.93  | 3  | 1 |
| 6.91E+18 | IsMasterProtein | A0A8C4ZRP9 | Biliverdin reductase B OS=Gadus morhua OX=8049 GN=blvrb PE=4 SV=1                                                | 21 | 3  | 12 | 3 | 209  | 22.5  | 8.02 | 36.84 | 3  | 1 |
| 7.01E+18 | IsMasterProtein | A0A8C5CJ9  | Mitochondrial proton/calcium exchanger protein OS=Gadus morhua OX=8049<br>PE=3 SV=1                              | 8  | 3  | 4  | 3 | 676  | 77    | 5.73 | 10.4  | 3  | 1 |
| 7.24E+18 | IsMasterProtein | A0A8C5BZH1 | Cyclin dependent kinase like 5 OS=Gadus morhua OX=8049<br>GN=LOC11555336 PE=4 SV=1                               | 7  | 3  | 3  | 3 | 1030 | 113.2 | 9.48 | 8.63  | 3  | 1 |
| 7.25E+18 | IsMasterProtein | A0A8C4YY07 | Dual-specificity kinase OS=Gadus morhua OX=8049 PE=3 SV=1                                                        | 14 | 3  | 3  | 3 | 413  | 47    | 7.02 | 8.04  | 3  | 1 |
| 7.3E+18  | IsMasterProtein | A0A8C4ZPX9 | Complement component 8, alpha polypeptide OS=Gadus morhua OX=8049<br>GN=C8A PE=3 SV=1                            | 8  | 3  | 3  | 3 | 590  | 65.4  | 6.76 | 7.9   | 3  | 1 |
| 7.43E+18 | IsMasterProtein | A0A8C5AKE9 | Ceramide synthase 6 OS=Gadus morhua OX=8049 GN=cers6 PE=4 SV=1                                                   | 13 | 3  | 3  | 3 | 568  | 62.2  | 9.63 | 7.48  | 3  | 1 |
| 7.45E+18 | IsMasterProtein | A0A8C5BIM3 | Uncharacterized protein OS=Gadus morhua OX=8049 PE=4 SV=1                                                        | 28 | 13 | 19 | 3 | 521  | 57.9  | 5.68 | 55.82 | 13 | 1 |
| 7.46E+18 | IsMasterProtein | A0A8C5ACV0 | ADAM metalloproteinase with thrombospondin type 1 motif, 12 OS=Gadus<br>morhua OX=8049 GN=adams12 PE=4 SV=1      | 6  | 4  | 4  | 3 | 1618 | 179.5 | 7.53 | 11.05 | 4  | 1 |
| 7.47E+18 | IsMasterProtein | A0A8C5FFW5 | Ankyrin repeat and sterile alpha motif domain containing 1A OS=Gadus<br>morhua OX=8049 GN=ANKS1A PE=4 SV=1       | 7  | 3  | 3  | 3 | 1042 | 113.6 | 6.87 | 8.35  | 3  | 1 |
| 7.56E+18 | IsMasterProtein | A0A8C5CM13 | Uncharacterized LOC115548709 OS=Gadus morhua OX=8049<br>GN=LOC115548709 PE=4 SV=1                                | 5  | 3  | 3  | 3 | 1376 | 150.9 | 5.2  | 7.94  | 3  | 1 |
| 7.66E+18 | IsMasterProtein | A0A8C4ZI32 | Epidermal growth factor receptor pathway substrate 15 OS=Gadus morhua<br>OX=8049 PE=4 SV=1                       | 8  | 3  | 3  | 3 | 944  | 102.7 | 4.74 | 8.65  | 3  | 1 |
| 7.72E+18 | IsMasterProtein | A0A8C5C4T1 | Collagen, type XII, alpha 1b OS=Gadus morhua OX=8049 PE=4 SV=1                                                   | 2  | 3  | 3  | 3 | 2808 | 303.1 | 6.4  | 7.37  | 3  | 1 |
| 7.81E+18 | IsMasterProtein | A0A8C5CRK2 | PKS_ER domain-containing protein OS=Gadus morhua OX=8049 PE=4 SV=1                                               | 15 | 3  | 3  | 3 | 480  | 51.2  | 6.52 | 8.19  | 3  | 1 |
| 7.86E+18 | IsMasterProtein | A0A8C5CNK3 | Photolyase/cryptochrome alpha/beta domain-containing protein OS=Gadus<br>morhua OX=8049 PE=3 SV=1                | 12 | 3  | 4  | 3 | 593  | 66.7  | 6.93 | 10.96 | 3  | 1 |
| 7.99E+18 | IsMasterProtein | A0A8C5CXW6 | A kinase (PRKA) anchor protein 8-like OS=Gadus morhua OX=8049<br>GN=akap8l PE=3 SV=1                             | 10 | 3  | 3  | 3 | 755  | 80.8  | 5.19 | 7.75  | 3  | 1 |
| 8E+18    | IsMasterProtein | A0A8C5A1P8 | Long-chain-fatty-acid--CoA ligase OS=Gadus morhua OX=8049 PE=3 SV=1                                              | 8  | 3  | 4  | 3 | 629  | 69.9  | 6.87 | 9.87  | 3  | 1 |
| 8.08E+18 | IsMasterProtein | A0A8C5A6A4 | HIVEP zinc finger 2a OS=Gadus morhua OX=8049 GN=hivep2a PE=4 SV=1                                                | 3  | 3  | 3  | 3 | 2508 | 266.7 | 7.34 | 7.14  | 3  | 1 |
| 8.2E+18  | IsMasterProtein | A0A8C5BTE1 | Neurexin 3b OS=Gadus morhua OX=8049 PE=3 SV=1                                                                    | 4  | 3  | 3  | 3 | 1681 | 182.7 | 5.6  | 8.64  | 3  | 1 |
| 8.26E+18 | IsMasterProtein | A0A8C4ZFE4 | Cyclase associated actin cytoskeleton regulatory protein 2 OS=Gadus morhua<br>OX=8049 GN=cap2 PE=3 SV=1          | 12 | 3  | 3  | 3 | 474  | 52.2  | 6.95 | 8.73  | 3  | 1 |
| 8.27E+18 | IsMasterProtein | A0A8C5FJ78 | Sphingosine kinase 2 OS=Gadus morhua OX=8049 GN=sphk2 PE=4 SV=1                                                  | 4  | 3  | 3  | 3 | 876  | 96.4  | 7.55 | 6.17  | 3  | 1 |
| 8.34E+18 | IsMasterProtein | A0A8C5CMN6 | Matrix-remodelling associated 5a OS=Gadus morhua OX=8049 PE=4 SV=1                                               | 2  | 3  | 3  | 3 | 2636 | 283.4 | 9.39 | 7.35  | 3  | 1 |
| 8.37E+18 | IsMasterProtein | A0A8C4ZFB3 | Fas binding factor 1 OS=Gadus morhua OX=8049 GN=fbf1 PE=4 SV=1                                                   | 4  | 3  | 4  | 3 | 1158 | 129.5 | 5.77 | 11.52 | 3  | 1 |
| 8.42E+18 | IsMasterProtein | A0A8C5CCI6 | Myosin Ic, paralog b OS=Gadus morhua OX=8049 PE=3 SV=1                                                           | 8  | 3  | 3  | 3 | 1031 | 118.4 | 8.95 | 9.6   | 3  | 1 |
| 8.42E+18 | IsMasterProtein | A0A8C5AS62 | Catenin (cadherin-associated protein), delta 2a OS=Gadus morhua OX=8049<br>PE=3 SV=1                             | 8  | 3  | 3  | 3 | 1037 | 111   | 8.31 | 8.46  | 3  | 1 |
| 8.47E+18 | IsMasterProtein | A0A8C4ZUM7 | Sarcolemma associated protein b OS=Gadus morhua OX=8049 GN=slmapb<br>PE=4 SV=1                                   | 9  | 3  | 3  | 3 | 405  | 45.3  | 5.21 | 8.54  | 3  | 1 |
| 8.47E+18 | IsMasterProtein | A0A8C5BXM3 | Proteasome subunit alpha type OS=Gadus morhua OX=8049 GN=PSMA8<br>PE=3 SV=1                                      | 18 | 3  | 3  | 3 | 260  | 28.9  | 9.06 | 8.86  | 3  | 1 |
| 8.54E+18 | IsMasterProtein | A0A8C5B418 | PAS domain-containing protein OS=Gadus morhua OX=8049 PE=4 SV=1                                                  | 4  | 3  | 3  | 3 | 1131 | 120.6 | 8.24 | 7.11  | 3  | 1 |
| 8.59E+18 | IsMasterProtein | A0A8C5CS13 | Nucleoside diphosphate kinase B OS=Gadus morhua OX=8049<br>GN=LOC115534945 PE=3 SV=1                             | 28 | 3  | 8  | 3 | 149  | 16.9  | 7.3  | 15.57 | 3  | 1 |
| 8.6E+18  | IsMasterProtein | A0A8C5AK98 | Collagen triple helix repeat containing 1 OS=Gadus morhua OX=8049<br>GN=CTHRC1 PE=4 SV=1                         | 18 | 3  | 3  | 3 | 158  | 17.7  | 6.9  | 7.3   | 3  | 1 |

|          |                 |            |                                                                                                              |    |   |   |   |      |       |       |       |   |   |
|----------|-----------------|------------|--------------------------------------------------------------------------------------------------------------|----|---|---|---|------|-------|-------|-------|---|---|
| 8.63E+18 | IsMasterProtein | A0A8C5FC86 | Synapse defective 1, Rho GTPase, homolog 2 (C. elegans) OS=Gadus morhua OX=8049 GN=SYDE2 PE=4 SV=1           | 1  | 3 | 3 | 3 | 1860 | 204.4 | 6.32  | 6.43  | 3 | 1 |
| 8.63E+18 | IsMasterProtein | A0A8C5A8T6 | Uncharacterized protein OS=Gadus morhua OX=8049 PE=4 SV=1                                                    | 2  | 3 | 3 | 3 | 3852 | 427.4 | 5.85  | 8.17  | 3 | 1 |
| 8.75E+18 | IsMasterProtein | A0A8C4ZAT7 | Uncharacterized protein OS=Gadus morhua OX=8049 PE=3 SV=1                                                    | 9  | 3 | 3 | 3 | 831  | 94.4  | 8.69  | 8.27  | 3 | 1 |
| 8.75E+18 | IsMasterProtein | A0A8C5FAA0 | Histone H2B OS=Gadus morhua OX=8049 GN=H2BE1 PE=3 SV=1                                                       | 39 | 4 | 5 | 3 | 127  | 13.9  | 10.26 | 14.16 | 4 | 1 |
| 8.88E+18 | IsMasterProtein | A0A8C5BP73 | YLP motif containing 1 OS=Gadus morhua OX=8049 GN=YLPM1 PE=4 SV=1                                            | 3  | 3 | 3 | 3 | 2277 | 250.8 | 6.7   | 8.24  | 3 | 1 |
| 8.89E+18 | IsMasterProtein | A0A8C5CYS9 | NAC alpha domain containing OS=Gadus morhua OX=8049 GN=nacad PE=4 SV=1                                       | 2  | 3 | 3 | 3 | 2229 | 239.3 | 4.74  | 7.3   | 3 | 1 |
| 8.89E+18 | IsMasterProtein | A0A8C5AU83 | Centrosomal protein of 162 kDa OS=Gadus morhua OX=8049 PE=3 SV=1                                             | 3  | 3 | 3 | 3 | 1418 | 157.9 | 6.25  | 7.74  | 3 | 1 |
| 8.97E+18 | IsMasterProtein | A0A8C4YX01 | Murine retrovirus integration site 1 homolog OS=Gadus morhua OX=8049 PE=4 SV=1                               | 3  | 3 | 3 | 3 | 1370 | 149.8 | 6.77  | 7.35  | 3 | 1 |
| 9.01E+18 | IsMasterProtein | A0A8C5FVY7 | Potassium voltage-gated channel subfamily B member 1-like OS=Gadus morhua OX=8049 GN=LOC115557031 PE=4 SV=1  | 10 | 3 | 3 | 3 | 828  | 91    | 7.49  | 7.66  | 3 | 1 |
| 9.11E+18 | IsMasterProtein | A0A8C4ZHA3 | Apoptosis inducing factor mitochondria associated 3 OS=Gadus morhua OX=8049 PE=4 SV=1                        | 9  | 3 | 3 | 3 | 588  | 64.4  | 8.19  | 7.77  | 3 | 1 |
| 9.12E+18 | IsMasterProtein | A0A8C5F8E4 | Bromodomain adjacent to zinc finger domain, 1A OS=Gadus morhua OX=8049 PE=4 SV=1                             | 5  | 3 | 3 | 3 | 1108 | 125.9 | 5.43  | 8.91  | 3 | 1 |
| 9.18E+18 | IsMasterProtein | A0A8C5CXT5 | Bromodomain and PHD finger containing, 3b OS=Gadus morhua OX=8049 GN=brpf3b PE=4 SV=1                        | 6  | 3 | 4 | 3 | 1286 | 141.4 | 7.62  | 8.07  | 3 | 1 |
| -9.2E+18 | IsMasterProtein | A0A8C5FRA2 | Laminin, beta 1a OS=Gadus morhua OX=8049 GN=lamb1a PE=4 SV=1                                                 | 2  | 2 | 2 | 2 | 1726 | 190.1 | 5.3   | 5.85  | 2 | 1 |
| -9.2E+18 | IsMasterProtein | A0A8C5AJM2 | Clustered mitochondria protein homolog OS=Gadus morhua OX=8049 GN=cluha PE=3 SV=1                            | 4  | 2 | 7 | 2 | 1237 | 139.2 | 6.09  | 17.7  | 2 | 1 |
| -9.2E+18 | IsMasterProtein | A0A8C5BRZ0 | NK6 homeobox 1 OS=Gadus morhua OX=8049 GN=nkx6.1 PE=4 SV=1                                                   | 10 | 2 | 2 | 2 | 305  | 32.9  | 9.38  | 5.2   | 2 | 1 |
| -9.2E+18 | IsMasterProtein | A0A8C5A131 | Annexin OS=Gadus morhua OX=8049 GN=anxa11b PE=3 SV=1                                                         | 6  | 2 | 2 | 2 | 431  | 46.9  | 8.73  | 5.79  | 2 | 1 |
| -9.2E+18 | IsMasterProtein | A0A8C5CK73 | Advillin OS=Gadus morhua OX=8049 GN=avil PE=3 SV=1                                                           | 6  | 2 | 2 | 2 | 779  | 87.1  | 5.45  | 5.36  | 2 | 1 |
| -9.2E+18 | IsMasterProtein | A0A8C5FS04 | Guanylate cyclase OS=Gadus morhua OX=8049 GN=si:ch73-139e5.4 PE=3 SV=1                                       | 3  | 2 | 3 | 2 | 1199 | 137.2 | 7.88  | 8.17  | 2 | 1 |
| -9.2E+18 | IsMasterProtein | A0A8C4ZPN5 | Heterogeneous nuclear ribonucleoprotein A1-like OS=Gadus morhua OX=8049 GN=LOC115540741 PE=4 SV=1            | 16 | 2 | 2 | 2 | 390  | 39.5  | 7.52  | 5.65  | 2 | 1 |
| -9.2E+18 | IsMasterProtein | A0A8C5FST0 | SEC63 homolog, protein translocation regulator OS=Gadus morhua OX=8049 GN=sec63 PE=4 SV=1                    | 5  | 2 | 2 | 2 | 752  | 86.5  | 5.87  | 5.7   | 2 | 1 |
| -9.2E+18 | IsMasterProtein | A0A8C5FDD3 | Sentrin-specific protease 1-like OS=Gadus morhua OX=8049 GN=si:dkey-21c19.3 PE=3 SV=1                        | 5  | 2 | 2 | 2 | 705  | 78.9  | 9.42  | 5.07  | 2 | 1 |
| -9.2E+18 | IsMasterProtein | A0A7S5GEE2 | MHC class I antigen (Fragment) OS=Gadus morhua OX=8049 PE=4 SV=1                                             | 54 | 2 | 2 | 2 | 63   | 7.2   | 4.72  | 4.65  | 2 | 1 |
| -9.2E+18 | IsMasterProtein | A0A8C5FQJ1 | Protein-tyrosine-phosphatase OS=Gadus morhua OX=8049 GN=ptprm PE=3 SV=1                                      | 2  | 2 | 2 | 2 | 1514 | 170.1 | 6.93  | 5.13  | 2 | 1 |
| -9.2E+18 | IsMasterProtein | A0A8C4Z594 | Translation factor GUF1, mitochondrial OS=Gadus morhua OX=8049 GN=guf1 PE=3 SV=1                             | 6  | 2 | 2 | 2 | 620  | 69.4  | 8.35  | 6.33  | 2 | 1 |
| -9.2E+18 | IsMasterProtein | A0A8C4Z743 | Uncharacterized protein OS=Gadus morhua OX=8049 PE=3 SV=1                                                    | 9  | 2 | 2 | 2 | 235  | 25.8  | 9.38  | 5.42  | 2 | 1 |
| -9.2E+18 | IsMasterProtein | A0A8C4ZKW0 | Sushi, von Willebrand factor type A, EGF and pentraxin domain containing 1 OS=Gadus morhua OX=8049 PE=4 SV=1 | 1  | 2 | 2 | 2 | 3490 | 373.1 | 6.19  | 5.07  | 2 | 1 |
| -9.2E+18 | IsMasterProtein | A0A8C5AVK7 | Multiple EGF-like-domains 11 OS=Gadus morhua OX=8049 GN=megf11 PE=4 SV=1                                     | 4  | 2 | 2 | 2 | 1016 | 108   | 6.3   | 5.73  | 2 | 1 |
| -9.2E+18 | IsMasterProtein | A0A8C4YZZ1 | IQ motif and Sec7 domain ArfGEF 3b OS=Gadus morhua OX=8049 PE=3 SV=1                                         | 5  | 2 | 2 | 2 | 648  | 71.3  | 8.69  | 5.05  | 2 | 1 |
| -9.2E+18 | IsMasterProtein | A0A8C5AKA8 | Neurogenic locus notch homolog protein 1 OS=Gadus morhua OX=8049 GN=notch1b PE=3 SV=1                        | 2  | 2 | 2 | 2 | 2495 | 268.8 | 5.24  | 5.56  | 2 | 1 |
| -9.1E+18 | IsMasterProtein | A0A8C4YVG3 | Flotillin OS=Gadus morhua OX=8049 GN=LOC115560808 PE=3 SV=1                                                  | 10 | 2 | 2 | 2 | 428  | 47.1  | 5.25  | 5.25  | 2 | 1 |
| -9.1E+18 | IsMasterProtein | A0A8C5FLE8 | NEDD4 binding protein 2 OS=Gadus morhua OX=8049 GN=n4bp2 PE=4 SV=1                                           | 2  | 2 | 2 | 2 | 1818 | 198.6 | 5.21  | 5.44  | 2 | 1 |
| -9.1E+18 | IsMasterProtein | A0A8C5AUY2 | Teneurin-3-like OS=Gadus morhua OX=8049 GN=TENM3 PE=3 SV=1                                                   | 1  | 2 | 2 | 2 | 2784 | 306.7 | 7.01  | 4.66  | 2 | 1 |
| -9.1E+18 | IsMasterProtein | A0A8C4ZF37 | Aldedh domain-containing protein OS=Gadus morhua OX=8049 PE=3 SV=1                                           | 9  | 4 | 4 | 2 | 527  | 57.1  | 6.73  | 12.64 | 4 | 1 |
| -9.1E+18 | IsMasterProtein | A0A8C5B8W2 | Acyl-coenzyme A oxidase OS=Gadus morhua OX=8049 GN=acox3 PE=3 SV=1                                           | 5  | 2 | 2 | 2 | 711  | 79.8  | 6.2   | 4.63  | 2 | 1 |

|          |                 |            |                                                                                                                                      |    |    |    |   |      |       |       |        |    |   |
|----------|-----------------|------------|--------------------------------------------------------------------------------------------------------------------------------------|----|----|----|---|------|-------|-------|--------|----|---|
| -9.1E+18 | IsMasterProtein | A0A8C5BQI7 | Integrator complex subunit 11 OS=Gadus morhua OX=8049 PE=4 SV=1                                                                      | 13 | 2  | 2  | 2 | 394  | 44.8  | 7.55  | 5.36   | 2  | 1 |
| -9.1E+18 | IsMasterProtein | A0A8C4ZB21 | Galactose-3-O-sulfotransferase 1a OS=Gadus morhua OX=8049 PE=3 SV=1                                                                  | 9  | 2  | 2  | 2 | 430  | 49.8  | 8.41  | 5.84   | 2  | 1 |
| -9.1E+18 | IsMasterProtein | A0A8C4Z6V1 | Poly [ADP-ribose] polymerase OS=Gadus morhua OX=8049 PE=3 SV=1                                                                       | 6  | 2  | 2  | 2 | 536  | 60.2  | 7.88  | 6.3    | 2  | 1 |
| -9.1E+18 | IsMasterProtein | A0A8C5C1Y0 | NEDD8-activating enzyme E1 catalytic subunit OS=Gadus morhua OX=8049 GN=UBA3 PE=3 SV=1                                               | 22 | 2  | 2  | 2 | 132  | 14.6  | 6.04  | 4.67   | 2  | 1 |
| -9.1E+18 | IsMasterProtein | A0A8C4ZXJ2 | Potassium intermediate/small conductance calcium-activated channel, subfamily N, member 3 OS=Gadus morhua OX=8049 GN=kenn3 PE=4 SV=1 | 4  | 2  | 3  | 2 | 846  | 90.7  | 9.42  | 7.22   | 2  | 1 |
| -9.1E+18 | IsMasterProtein | A0A8C5BVW3 | Dual serine/threonine and tyrosine protein kinase OS=Gadus morhua OX=8049 GN=dsty PE=4 SV=1                                          | 4  | 2  | 2  | 2 | 933  | 104.4 | 7.11  | 4.79   | 2  | 1 |
| -9.1E+18 | IsMasterProtein | A0A8C5C7J5 | Fatty acid-binding protein, brain-like OS=Gadus morhua OX=8049 GN=LOC115534538 PE=3 SV=1                                             | 15 | 2  | 3  | 2 | 131  | 14.9  | 5.87  | 6.72   | 2  | 1 |
| -9.1E+18 | IsMasterProtein | A0A8C5CLD7 | Cytoskeleton associated protein 5 OS=Gadus morhua OX=8049 GN=ckap5 PE=3 SV=1                                                         | 2  | 3  | 3  | 2 | 1985 | 220.3 | 8.53  | 7.6    | 3  | 1 |
| -9.1E+18 | IsMasterProtein | A0A8C5A6F6 | S1 motif domain-containing protein OS=Gadus morhua OX=8049 PE=4 SV=1                                                                 | 4  | 2  | 2  | 2 | 897  | 99.9  | 10.02 | 6.05   | 2  | 1 |
| -9.1E+18 | IsMasterProtein | A0A8C5A026 | Stress-induced-phosphoprotein 1 OS=Gadus morhua OX=8049 GN=stip1 PE=4 SV=1                                                           | 4  | 2  | 2  | 2 | 542  | 61.3  | 7.09  | 6.04   | 2  | 1 |
| -9.1E+18 | IsMasterProtein | A0A8C5CPV7 | Tubulin tyrosine ligase-like family, member 7 OS=Gadus morhua OX=8049 PE=4 SV=1                                                      | 4  | 2  | 2  | 2 | 850  | 98    | 9.2   | 5.28   | 2  | 1 |
| -9.1E+18 | IsMasterProtein | A0A8C5BK12 | Tight junction protein ZO-2-like OS=Gadus morhua OX=8049 GN=LOC115545965 PE=3 SV=1                                                   | 6  | 4  | 4  | 2 | 951  | 105.9 | 6.71  | 9.93   | 4  | 1 |
| -9.1E+18 | IsMasterProtein | A0A8C5AUP1 | Cyclin-dependent kinase 20 OS=Gadus morhua OX=8049 GN=cdk20 PE=3 SV=1                                                                | 10 | 3  | 4  | 2 | 464  | 53.8  | 9.5   | 9.37   | 3  | 1 |
| -9.1E+18 | IsMasterProtein | A0A8C5AS32 | FYVE, RhoGEF and PH domain containing 4a OS=Gadus morhua OX=8049 GN=fgd4a PE=4 SV=1                                                  | 4  | 2  | 2  | 2 | 902  | 99.7  | 7.17  | 4.58   | 2  | 1 |
| -9.1E+18 | IsMasterProtein | A0A8C5A7L2 | EBNA1 binding protein 2 OS=Gadus morhua OX=8049 GN=EBNA1BP2 PE=3 SV=1                                                                | 8  | 2  | 2  | 2 | 324  | 36.4  | 9.74  | 6.48   | 2  | 1 |
| -9.1E+18 | IsMasterProtein | A0A8C5CEV4 | Serine peptidase inhibitor, Kunitz type 1 b OS=Gadus morhua OX=8049 PE=4 SV=1                                                        | 6  | 2  | 2  | 2 | 499  | 54.4  | 5.44  | 5.93   | 2  | 1 |
| -9.1E+18 | IsMasterProtein | A0A8C5FW43 | Uncharacterized protein OS=Gadus morhua OX=8049 PE=4 SV=1                                                                            | 13 | 2  | 2  | 2 | 383  | 39    | 11.49 | 4.89   | 2  | 1 |
| -9.1E+18 | IsMasterProtein | A0A8C5CD89 | Importin 4 OS=Gadus morhua OX=8049 PE=4 SV=1                                                                                         | 4  | 2  | 2  | 2 | 1064 | 116.4 | 5.02  | 5.22   | 2  | 1 |
| -9.1E+18 | IsMasterProtein | A0A8C5CBZ3 | Catenin (cadherin-associated protein), alpha 1 OS=Gadus morhua OX=8049 GN=ctnna1 PE=3 SV=1                                           | 3  | 2  | 2  | 2 | 934  | 103.7 | 6.58  | 5.75   | 2  | 1 |
| -9.1E+18 | IsMasterProtein | A0A8C5C7R3 | Ubiquitin carboxyl-terminal hydrolase OS=Gadus morhua OX=8049 GN=USP44 PE=3 SV=1                                                     | 5  | 2  | 2  | 2 | 793  | 88    | 9.55  | 5.79   | 2  | 1 |
| -9.1E+18 | IsMasterProtein | A0A8C4ZJQ5 | Vacuolar protein sorting-associated protein 16 homolog OS=Gadus morhua OX=8049 GN=vps16 PE=3 SV=1                                    | 3  | 2  | 2  | 2 | 835  | 93.7  | 7.52  | 4.25   | 2  | 1 |
| -9E+18   | IsMasterProtein | A0A8C4YZ16 | Homer scaffold protein 2 OS=Gadus morhua OX=8049 GN=HOMER2 PE=3 SV=1                                                                 | 8  | 2  | 2  | 2 | 356  | 39.8  | 5.19  | 4.73   | 2  | 1 |
| -9E+18   | IsMasterProtein | A0A8C5A611 | Calpain 5a OS=Gadus morhua OX=8049 PE=3 SV=1                                                                                         | 4  | 2  | 2  | 2 | 599  | 68    | 5.8   | 5.72   | 2  | 1 |
| -9E+18   | IsMasterProtein | A0A8C4ZRH8 | AMOP domain-containing protein OS=Gadus morhua OX=8049 PE=4 SV=1                                                                     | 25 | 3  | 3  | 2 | 164  | 18.8  | 6.96  | 9.42   | 3  | 1 |
| -9E+18   | IsMasterProtein | A0A8C5FG86 | Villin-1 OS=Gadus morhua OX=8049 PE=3 SV=1                                                                                           | 3  | 2  | 2  | 2 | 818  | 92    | 6.62  | 6.58   | 2  | 1 |
| -9E+18   | IsMasterProtein | A0A8C5AWF5 | Thrombospondin-1-like OS=Gadus morhua OX=8049 GN=LOC115543658 PE=3 SV=1                                                              | 7  | 5  | 6  | 2 | 1127 | 124.7 | 5.41  | 15.07  | 5  | 1 |
| -9E+18   | IsMasterProtein | A0A8C5FSB3 | Protein tyrosine kinase 7b OS=Gadus morhua OX=8049 GN=PTK7 PE=4 SV=1                                                                 | 4  | 2  | 2  | 2 | 983  | 109.2 | 6.8   | 5.43   | 2  | 1 |
| -9E+18   | IsMasterProtein | A0A8C4ZAI9 | Uncharacterized protein OS=Gadus morhua OX=8049 PE=4 SV=1                                                                            | 4  | 2  | 2  | 2 | 746  | 82.3  | 8.27  | 4.8    | 2  | 1 |
| -9E+18   | IsMasterProtein | A0A8C5BRD9 | Clathrin heavy chain OS=Gadus morhua OX=8049 GN=LOC115561405 PE=3 SV=1                                                               | 24 | 29 | 34 | 2 | 1673 | 190.6 | 5.66  | 106.61 | 29 | 1 |
| -9E+18   | IsMasterProtein | A0A8C5CYE6 | Peroxidasin OS=Gadus morhua OX=8049 PE=4 SV=1                                                                                        | 2  | 2  | 2  | 2 | 1407 | 156.4 | 6.9   | 5.42   | 2  | 1 |
| -9E+18   | IsMasterProtein | A0A8C5A5K2 | Strawberry notch homolog 1 OS=Gadus morhua OX=8049 GN=SBNO1 PE=3 SV=1                                                                | 3  | 2  | 2  | 2 | 1406 | 156.3 | 8.29  | 5.21   | 2  | 1 |
| -9E+18   | IsMasterProtein | A0A8C5AGV7 | Uncharacterized protein OS=Gadus morhua OX=8049 PE=4 SV=1                                                                            | 11 | 2  | 2  | 2 | 617  | 69    | 9     | 6.44   | 2  | 1 |
| -9E+18   | IsMasterProtein | A0A8C5BP94 | Histone deacetylase 11 OS=Gadus morhua OX=8049 PE=4 SV=1                                                                             | 11 | 2  | 2  | 2 | 419  | 46.6  | 6.37  | 5.57   | 2  | 1 |
| -9E+18   | IsMasterProtein | A0A8C5CEE2 | Glutamate receptor OS=Gadus morhua OX=8049 PE=3 SV=1                                                                                 | 3  | 2  | 2  | 2 | 931  | 104.7 | 7.74  | 4.17   | 2  | 1 |
| -9E+18   | IsMasterProtein | A0A8C4ZP25 | Selenoprotein F OS=Gadus morhua OX=8049 PE=3 SV=1                                                                                    | 25 | 2  | 3  | 2 | 115  | 12.9  | 4.37  | 8.77   | 2  | 1 |

|          |                 |            |                                                                                                                 |    |   |   |   |      |       |      |       |   |   |
|----------|-----------------|------------|-----------------------------------------------------------------------------------------------------------------|----|---|---|---|------|-------|------|-------|---|---|
| -9E+18   | IsMasterProtein | A0A8C5CHM0 | Ligand dependent nuclear receptor corepressor-like OS=Gadus morhua OX=8049 GN=lcrl PE=4 SV=1                    | 2  | 2 | 2 | 2 | 1942 | 213.6 | 8.87 | 5.03  | 2 | 1 |
| -9E+18   | IsMasterProtein | A0A8C4YX94 | Vitronectin a OS=Gadus morhua OX=8049 GN=vtna PE=4 SV=1                                                         | 4  | 2 | 2 | 2 | 579  | 66.1  | 7.09 | 5.35  | 2 | 1 |
| -9E+18   | IsMasterProtein | A0A8C5CFB1 | Vitellogenin 3, phosphitinless OS=Gadus morhua OX=8049 PE=4 SV=1                                                | 2  | 2 | 2 | 2 | 1239 | 137   | 8.13 | 4.27  | 2 | 1 |
| -9E+18   | IsMasterProtein | A0A8C5C066 | Procollagen, type IX, alpha 2 OS=Gadus morhua OX=8049 GN=col9a2 PE=4 SV=1                                       | 7  | 2 | 2 | 2 | 691  | 64.8  | 9.14 | 5.32  | 2 | 1 |
| -9E+18   | IsMasterProtein | A0A8C5F9L5 | PDZ domain containing 3b OS=Gadus morhua OX=8049 PE=4 SV=1                                                      | 9  | 2 | 2 | 2 | 505  | 54.7  | 6.2  | 5.66  | 2 | 1 |
| -9E+18   | IsMasterProtein | A0A8C5BTZ8 | Acetyl-CoA carboxylase OS=Gadus morhua OX=8049 PE=4 SV=1                                                        | 2  | 3 | 3 | 2 | 2282 | 255.5 | 6.71 | 8.01  | 3 | 1 |
| -9E+18   | IsMasterProtein | A0A8C5FU70 | F-box domain-containing protein OS=Gadus morhua OX=8049 PE=4 SV=1                                               | 8  | 2 | 2 | 2 | 791  | 87.5  | 7.52 | 6.16  | 2 | 1 |
| -8.9E+18 | IsMasterProtein | A0A8C5A9R8 | Basonuclin 1 OS=Gadus morhua OX=8049 GN=bnc1 PE=4 SV=1                                                          | 4  | 2 | 3 | 2 | 1190 | 127.8 | 5.9  | 7.39  | 2 | 1 |
| -8.9E+18 | IsMasterProtein | A0A8C5AQV1 | Peptidylglycine alpha-amidating monooxygenase OS=Gadus morhua OX=8049 GN=pam PE=3 SV=1                          | 4  | 2 | 2 | 2 | 801  | 89    | 6.67 | 6.13  | 2 | 1 |
| -8.9E+18 | IsMasterProtein | A0A7S5GEL2 | MHC class I antigen (Fragment) OS=Gadus morhua OX=8049 PE=4 SV=1                                                | 40 | 2 | 2 | 2 | 63   | 7.1   | 5.97 | 5.43  | 2 | 1 |
| -8.9E+18 | IsMasterProtein | A0A8C5AUM1 | Non-specific serine/threonine protein kinase OS=Gadus morhua OX=8049 GN=stk10 PE=4 SV=1                         | 2  | 2 | 2 | 2 | 1033 | 117.4 | 7.99 | 4.46  | 2 | 1 |
| -8.9E+18 | IsMasterProtein | A0A8C4ZCA5 | Protein rogdi homolog OS=Gadus morhua OX=8049 PE=3 SV=1                                                         | 8  | 2 | 2 | 2 | 282  | 32.2  | 8.53 | 5.41  | 2 | 1 |
| -8.9E+18 | IsMasterProtein | A0A8C5BSA1 | Exportin 7 OS=Gadus morhua OX=8049 GN=xpo7 PE=3 SV=1                                                            | 4  | 2 | 3 | 2 | 1063 | 120.3 | 6.29 | 4.58  | 2 | 1 |
| -8.9E+18 | IsMasterProtein | A0A8C5CZV0 | Trinucleotide repeat containing adaptor 6A OS=Gadus morhua OX=8049 GN=tnrc6a PE=4 SV=1                          | 3  | 2 | 2 | 2 | 1593 | 162.4 | 6.92 | 6.03  | 2 | 1 |
| -8.9E+18 | IsMasterProtein | A0A8C5AHH3 | Interferon-induced very large GTPase 1-like OS=Gadus morhua OX=8049 GN=LOC115529042 PE=3 SV=1                   | 2  | 3 | 4 | 2 | 1649 | 188.8 | 6.37 | 6.57  | 3 | 1 |
| -8.9E+18 | IsMasterProtein | A0A8C5C6S0 | Regulator of telomere elongation helicase 1 OS=Gadus morhua OX=8049 GN=rtel1 PE=3 SV=1                          | 4  | 2 | 2 | 2 | 1098 | 122.3 | 8.44 | 5.51  | 2 | 1 |
| -8.9E+18 | IsMasterProtein | A0A8C5FPR1 | EF-hand and coiled-coil domain-containing protein 1-like OS=Gadus morhua OX=8049 GN=si:ch211-112f3.4 PE=4 SV=1  | 5  | 2 | 2 | 2 | 638  | 71    | 6.55 | 4.78  | 2 | 1 |
| -8.9E+18 | IsMasterProtein | A0A8C5FTU0 | Mitochondrial import inner membrane translocase subunit TIM44 OS=Gadus morhua OX=8049 GN=LOC115549086 PE=3 SV=1 | 6  | 2 | 2 | 2 | 417  | 47.4  | 6.21 | 4.41  | 2 | 1 |
| -8.9E+18 | IsMasterProtein | A0A8C5FMJ4 | RNA helicase OS=Gadus morhua OX=8049 PE=3 SV=1                                                                  | 6  | 2 | 2 | 2 | 389  | 44.5  | 6.46 | 4.34  | 2 | 1 |
| -8.9E+18 | IsMasterProtein | A0A8C5B0Z3 | Phospholipid-transporting ATPase OS=Gadus morhua OX=8049 PE=3 SV=1                                              | 4  | 2 | 2 | 2 | 1472 | 164.5 | 6.74 | 5.64  | 2 | 1 |
| -8.9E+18 | IsMasterProtein | A0A8C5BUR1 | Carbohydrate sulfotransferase OS=Gadus morhua OX=8049 GN=LOC115551248 PE=3 SV=1                                 | 8  | 2 | 3 | 2 | 346  | 39.7  | 9.73 | 7.44  | 2 | 1 |
| -8.9E+18 | IsMasterProtein | A0A8C5BR31 | Uncharacterized protein OS=Gadus morhua OX=8049 PE=4 SV=1                                                       | 5  | 2 | 2 | 2 | 628  | 70.9  | 8.66 | 4.12  | 2 | 1 |
| -8.9E+18 | IsMasterProtein | A0A8C5BMG0 | Casein kinase 1 epsilon OS=Gadus morhua OX=8049 GN=csnk1e PE=3 SV=1                                             | 6  | 2 | 2 | 2 | 499  | 55.9  | 9.61 | 4.57  | 2 | 1 |
| -8.8E+18 | IsMasterProtein | A0A8C5BAD1 | Xin actin binding repeat containing 2b OS=Gadus morhua OX=8049 PE=3 SV=1                                        | 2  | 2 | 2 | 2 | 1487 | 170.1 | 5.08 | 4.75  | 2 | 1 |
| -8.8E+18 | IsMasterProtein | A0A8C5AU65 | Uncharacterized protein OS=Gadus morhua OX=8049 PE=4 SV=1                                                       | 5  | 4 | 5 | 2 | 903  | 101.3 | 6.3  | 11.97 | 4 | 1 |
| -8.8E+18 | IsMasterProtein | A0A8C5C5G9 | Synaptotagmin binding cytoplasmic RNA interacting protein OS=Gadus morhua OX=8049 GN=syncrip PE=4 SV=1          | 7  | 3 | 4 | 2 | 556  | 61.5  | 7.17 | 10.81 | 3 | 1 |
| -8.8E+18 | IsMasterProtein | A0A8C5B3Y7 | Microtubule-associated protein OS=Gadus morhua OX=8049 GN=mapta PE=4 SV=1                                       | 7  | 2 | 2 | 2 | 467  | 48.4  | 9.77 | 4.79  | 2 | 1 |
| -8.8E+18 | IsMasterProtein | A0A8C5BWX1 | Notch receptor 3 OS=Gadus morhua OX=8049 GN=notch3 PE=3 SV=1                                                    | 3  | 3 | 3 | 2 | 2447 | 264.7 | 5.47 | 8.39  | 3 | 1 |
| -8.8E+18 | IsMasterProtein | A0A8C5CII8 | Phosphodiesterase OS=Gadus morhua OX=8049 GN=pde4d PE=3 SV=1                                                    | 5  | 2 | 2 | 2 | 819  | 91.8  | 4.96 | 5.17  | 2 | 1 |
| -8.8E+18 | IsMasterProtein | A0A8C4ZWN2 | tRNA (guanine(26)-N(2))-dimethyltransferase OS=Gadus morhua OX=8049 GN=trmt1 PE=3 SV=1                          | 3  | 2 | 2 | 2 | 660  | 73.5  | 7.72 | 4.29  | 2 | 1 |
| -8.8E+18 | IsMasterProtein | A0A8C4YWW7 | Galactosamine (N-acetyl)-6-sulfatase OS=Gadus morhua OX=8049 GN=gals PE=3 SV=1                                  | 8  | 2 | 2 | 2 | 530  | 58.8  | 7.71 | 5.16  | 2 | 1 |
| -8.8E+18 | IsMasterProtein | A0A8C5FRI4 | Periostin, osteoblast specific factor a OS=Gadus morhua OX=8049 GN=POSTN PE=4 SV=1                              | 3  | 2 | 2 | 2 | 1069 | 114.9 | 7.33 | 4.56  | 2 | 1 |
| -8.8E+18 | IsMasterProtein | A0A8C4ZIS0 | Polypeptide N-acetylgalactosaminyltransferase OS=Gadus morhua OX=8049 PE=3 SV=1                                 | 6  | 2 | 2 | 2 | 609  | 68    | 6.73 | 5.24  | 2 | 1 |
| -8.8E+18 | IsMasterProtein | A0A8C5A8S5 | DNA topoisomerase II binding protein 1 OS=Gadus morhua OX=8049 GN=topbp1 PE=4 SV=1                              | 3  | 2 | 2 | 2 | 1532 | 168.5 | 6.35 | 5.55  | 2 | 1 |
| -8.8E+18 | IsMasterProtein | A0A8C5BNY5 | Meiosis specific with OB-fold OS=Gadus morhua OX=8049 GN=meib PE=4 SV=1                                         | 12 | 2 | 2 | 2 | 448  | 49.9  | 7.53 | 5.67  | 2 | 1 |



|          |                 |            |                                                                                                                                                |    |    |    |   |      |       |       |        |    |   |
|----------|-----------------|------------|------------------------------------------------------------------------------------------------------------------------------------------------|----|----|----|---|------|-------|-------|--------|----|---|
| -8.8E+18 | IsMasterProtein | A0A8C4ZRX4 | Palmitoyltransferase OS=Gadus morhua OX=8049 GN=zdhhc5a PE=3 SV=1                                                                              | 4  | 2  | 2  | 2 | 785  | 84.3  | 9.36  | 4.65   | 2  | 1 |
| -8.8E+18 | IsMasterProtein | A0A8C5CK26 | Lamin B1 OS=Gadus morhua OX=8049 GN=lmnb1 PE=3 SV=1                                                                                            | 8  | 2  | 2  | 2 | 585  | 65.5  | 5.14  | 5.59   | 2  | 1 |
| -8.8E+18 | IsMasterProtein | A0A8C5CGC1 | Uncharacterized protein OS=Gadus morhua OX=8049 PE=3 SV=1                                                                                      | 1  | 3  | 3  | 2 | 4241 | 478.9 | 6.28  | 7.61   | 3  | 1 |
| -8.8E+18 | IsMasterProtein | A0A8C4ZCB0 | Thrombospondin type laminin G domain and EAR repeats OS=Gadus morhua OX=8049 GN=TSPEAR PE=4 SV=1                                               | 7  | 2  | 2  | 2 | 689  | 78.6  | 6.62  | 5.81   | 2  | 1 |
| -8.8E+18 | IsMasterProtein | A0A8C5BST0 | Ring finger protein 220a OS=Gadus morhua OX=8049 GN=rf220a PE=4 SV=1                                                                           | 10 | 2  | 2  | 2 | 477  | 52.2  | 7.24  | 6.7    | 2  | 1 |
| -8.8E+18 | IsMasterProtein | A0A8C4ZXC1 | Uncharacterized protein OS=Gadus morhua OX=8049 PE=4 SV=1                                                                                      | 4  | 2  | 2  | 2 | 858  | 96.4  | 5.59  | 4.66   | 2  | 1 |
| -8.8E+18 | IsMasterProtein | C8YNR1     | Hemoglobin beta 3 OS=Gadus morhua OX=8049 GN=HbB3 PE=3 SV=1                                                                                    | 74 | 12 | 63 | 2 | 147  | 16.6  | 6.67  | 237.06 | 12 | 1 |
| -8.8E+18 | IsMasterProtein | A0A8C5C1G5 | Receptor protein-tyrosine kinase OS=Gadus morhua OX=8049 GN=epha2b PE=4 SV=1                                                                   | 4  | 2  | 2  | 2 | 943  | 103.7 | 6.62  | 5.12   | 2  | 1 |
| -8.8E+18 | IsMasterProtein | A0A8C4ZAR8 | 40S ribosomal protein S15 OS=Gadus morhua OX=8049 GN=rps15 PE=3 SV=1                                                                           | 23 | 2  | 2  | 2 | 145  | 17    | 10.23 | 6.18   | 2  | 1 |
| -8.8E+18 | IsMasterProtein | A0A8C5A6S7 | Phosphatidylinositol 3-kinase regulatory subunit alpha-like OS=Gadus morhua OX=8049 GN=LOC115545002 PE=3 SV=1                                  | 4  | 2  | 2  | 2 | 620  | 71.1  | 6.55  | 4.9    | 2  | 1 |
| -8.8E+18 | IsMasterProtein | A0A8C5B6G0 | Calcium channel, voltage-dependent, alpha 2/delta subunit 2a OS=Gadus morhua OX=8049 GN=cacna2d2a PE=3 SV=1                                    | 3  | 2  | 2  | 2 | 963  | 109.1 | 5.01  | 5.13   | 2  | 1 |
| -8.8E+18 | IsMasterProtein | A0A8C5FIG9 | Serine palmitoyltransferase, long chain base subunit 1 OS=Gadus morhua OX=8049 PE=4 SV=1                                                       | 7  | 2  | 2  | 2 | 470  | 53.1  | 6.67  | 4.8    | 2  | 1 |
| -8.8E+18 | IsMasterProtein | A0A8C5AE23 | RAB11 binding and LisH domain, coiled-coil and HEAT repeat containing OS=Gadus morhua OX=8049 GN=relch PE=4 SV=1                               | 3  | 2  | 2  | 2 | 1155 | 128.5 | 5.77  | 6.25   | 2  | 1 |
| -8.8E+18 | IsMasterProtein | A0A8C5ABD5 | Protein kinase C OS=Gadus morhua OX=8049 GN=prkcd PE=3 SV=1                                                                                    | 7  | 2  | 3  | 2 | 670  | 76.6  | 7.64  | 5.82   | 2  | 1 |
| -8.7E+18 | IsMasterProtein | A0A8C5CAJ5 | Armadillo repeat containing 4 OS=Gadus morhua OX=8049 PE=4 SV=1                                                                                | 4  | 2  | 2  | 2 | 983  | 108.1 | 7.27  | 5.06   | 2  | 1 |
| -8.7E+18 | IsMasterProtein | A0A8C4ZXW8 | Non-specific serine/threonine protein kinase OS=Gadus morhua OX=8049 GN=ulk2 PE=4 SV=1                                                         | 6  | 2  | 2  | 2 | 1037 | 112.1 | 8.91  | 5.42   | 2  | 1 |
| -8.7E+18 | IsMasterProtein | A0A8C5FQJ8 | Ferredoxin-fold anticodon binding domain containing 1 OS=Gadus morhua OX=8049 PE=4 SV=1                                                        | 6  | 2  | 2  | 2 | 575  | 64.3  | 6.95  | 4.85   | 2  | 1 |
| -8.7E+18 | IsMasterProtein | A0A8C5F777 | Alpha-galactosidase OS=Gadus morhua OX=8049 GN=gla PE=3 SV=1                                                                                   | 7  | 2  | 2  | 2 | 407  | 45.7  | 6.9   | 5.14   | 2  | 1 |
| -8.7E+18 | IsMasterProtein | A0A8C5BEH5 | Anion exchange protein OS=Gadus morhua OX=8049 PE=3 SV=1                                                                                       | 7  | 5  | 6  | 2 | 910  | 101.6 | 5.6   | 17.63  | 5  | 1 |
| -8.7E+18 | IsMasterProtein | A0A8C5FVB0 | Glutaminase OS=Gadus morhua OX=8049 GN=GLS PE=3 SV=1                                                                                           | 6  | 2  | 2  | 2 | 636  | 70.4  | 7.02  | 5.62   | 2  | 1 |
| -8.7E+18 | IsMasterProtein | A0A8C5BI76 | SRCR domain-containing protein OS=Gadus morhua OX=8049 PE=4 SV=1                                                                               | 7  | 2  | 2  | 2 | 596  | 67.2  | 6.61  | 5.03   | 2  | 1 |
| -8.7E+18 | IsMasterProtein | A0A8C4ZDY5 | Immunoglobulin superfamily, member 9Ba OS=Gadus morhua OX=8049 GN=IGSF9B PE=4 SV=1                                                             | 6  | 2  | 3  | 2 | 813  | 90.2  | 6.21  | 9.46   | 2  | 1 |
| -8.7E+18 | IsMasterProtein | A0A8C4ZHL4 | SWI/SNF related, matrix associated, actin dependent regulator of chromatin, subfamily d, member 1 OS=Gadus morhua OX=8049 GN=smardc1 PE=3 SV=1 | 16 | 2  | 2  | 2 | 450  | 52.2  | 8.85  | 5.59   | 2  | 1 |
| -8.7E+18 | IsMasterProtein | A0A8C5BTI5 | Adenylate cyclase type 6 OS=Gadus morhua OX=8049 PE=3 SV=1                                                                                     | 5  | 4  | 4  | 2 | 1149 | 129.6 | 7.49  | 10.14  | 4  | 1 |
| -8.7E+18 | IsMasterProtein | A0A8C5FG73 | SH3 and PX domains 2B OS=Gadus morhua OX=8049 GN=sh3pxd2b PE=3 SV=1                                                                            | 3  | 2  | 2  | 2 | 903  | 100.6 | 8.75  | 6.23   | 2  | 1 |
| -8.7E+18 | IsMasterProtein | A0A8C4ZNK5 | Metal response element binding transcription factor 2 OS=Gadus morhua OX=8049 GN=mtf2 PE=3 SV=1                                                | 5  | 2  | 4  | 2 | 602  | 67.9  | 8.76  | 6.81   | 2  | 1 |
| -8.7E+18 | IsMasterProtein | A0A8C5BY57 | Structural maintenance of chromosomes protein 4 OS=Gadus morhua OX=8049 GN=smc4 PE=3 SV=1                                                      | 2  | 2  | 2  | 2 | 1163 | 131.8 | 8.15  | 4.87   | 2  | 1 |
| -8.6E+18 | IsMasterProtein | A0A8C4Z073 | Protein-synthesizing GTPase OS=Gadus morhua OX=8049 GN=EIF2S3 PE=4 SV=1                                                                        | 6  | 2  | 2  | 2 | 472  | 51.3  | 8.28  | 4.75   | 2  | 1 |
| -8.6E+18 | IsMasterProtein | A0A8C5AG22 | Ubiquitinyl hydrolase 1 OS=Gadus morhua OX=8049 GN=USP34 PE=3 SV=1                                                                             | 1  | 2  | 3  | 2 | 2796 | 317.2 | 6.04  | 4.97   | 2  | 1 |
| -8.6E+18 | IsMasterProtein | A0A8C5CDX4 | SH3 domain containing ring finger 2 OS=Gadus morhua OX=8049 GN=sh3rf2 PE=3 SV=1                                                                | 7  | 2  | 2  | 2 | 794  | 85.3  | 9.58  | 5.59   | 2  | 1 |
| -8.6E+18 | IsMasterProtein | A0A8C4Z3G0 | Target of EGR1, exonuclease OS=Gadus morhua OX=8049 GN=toe1 PE=3 SV=1                                                                          | 6  | 2  | 2  | 2 | 531  | 58.8  | 6.49  | 4.68   | 2  | 1 |
| -8.6E+18 | IsMasterProtein | A0A8C5AFX3 | Rho guanine nucleotide exchange factor (GEF) 1a OS=Gadus morhua OX=8049 GN=arhgef1a PE=4 SV=1                                                  | 7  | 2  | 2  | 2 | 790  | 89.1  | 7.87  | 5.59   | 2  | 1 |
| -8.6E+18 | IsMasterProtein | A0A8C5AXI6 | IQ motif containing GTPase activating protein 2 OS=Gadus morhua OX=8049 GN=iqgap2 PE=4 SV=1                                                    | 2  | 2  | 4  | 2 | 1646 | 185.7 | 6.09  | 11.93  | 2  | 1 |



|          |                 |            |                                                                                                                         |    |   |   |   |      |       |       |       |   |   |
|----------|-----------------|------------|-------------------------------------------------------------------------------------------------------------------------|----|---|---|---|------|-------|-------|-------|---|---|
| -8.6E+18 | IsMasterProtein | A0A8C5C7K5 | Sperm antigen with calponin homology and coiled-coil domains 1 OS=Gadus morhua OX=8049 PE=4 SV=1                        | 4  | 2 | 3 | 2 | 811  | 88.7  | 5.83  | 10    | 2 | 1 |
| -8.6E+18 | IsMasterProtein | A0A8C4YXX6 | Aminopeptidase OS=Gadus morhua OX=8049 GN=LOC115545236 PE=3 SV=1                                                        | 3  | 2 | 2 | 2 | 909  | 103   | 5.97  | 4.71  | 2 | 1 |
| -8.6E+18 | IsMasterProtein | A0A8C5CIZ3 | DENN domain-containing protein 1B-like OS=Gadus morhua OX=8049 GN=si:dkey-76b14.2 PE=4 SV=1                             | 5  | 2 | 2 | 2 | 900  | 101.8 | 5.25  | 6.78  | 2 | 1 |
| -8.6E+18 | IsMasterProtein | A0A8C5CUL4 | SET binding protein 1 OS=Gadus morhua OX=8049 GN=setbp1 PE=4 SV=1                                                       | 2  | 2 | 2 | 2 | 1671 | 181   | 10.39 | 5.35  | 2 | 1 |
| -8.6E+18 | IsMasterProtein | A0A8C5C8I9 | Solute carrier family 27 member 4 OS=Gadus morhua OX=8049 PE=3 SV=1                                                     | 4  | 2 | 2 | 2 | 631  | 71.1  | 7.64  | 5.94  | 2 | 1 |
| -8.5E+18 | IsMasterProtein | A0A8C5F779 | SAP domain containing ribonucleoprotein OS=Gadus morhua OX=8049 GN=samp PE=4 SV=1                                       | 18 | 2 | 2 | 2 | 213  | 23.2  | 5.9   | 4.39  | 2 | 1 |
| -8.5E+18 | IsMasterProtein | A0A8C5D105 | Uncharacterized protein OS=Gadus morhua OX=8049 PE=4 SV=1                                                               | 3  | 2 | 2 | 2 | 994  | 108.6 | 7.96  | 4.55  | 2 | 1 |
| -8.5E+18 | IsMasterProtein | A0A8C5AQC3 | Aromatic-L-amino-acid decarboxylase-like OS=Gadus morhua OX=8049 GN=LOC115554234 PE=3 SV=1                              | 7  | 2 | 2 | 2 | 486  | 54.9  | 5.83  | 4.96  | 2 | 1 |
| -8.5E+18 | IsMasterProtein | A0A8C4Z2Y7 | MAP kinase-activating death domain protein OS=Gadus morhua OX=8049 GN=madd PE=3 SV=1                                    | 2  | 2 | 2 | 2 | 1465 | 160.3 | 6.55  | 5.55  | 2 | 1 |
| -8.5E+18 | IsMasterProtein | A0A8C5AS88 | Ubiquitin carboxyl-terminal hydrolase OS=Gadus morhua OX=8049 GN=USP37 PE=3 SV=1                                        | 6  | 2 | 2 | 2 | 879  | 97.5  | 6.87  | 5.67  | 2 | 1 |
| -8.5E+18 | IsMasterProtein | A0A8C5BQY7 | Disks large-associated protein 1-like OS=Gadus morhua OX=8049 GN=LOC115549066 PE=3 SV=1                                 | 4  | 2 | 2 | 2 | 1151 | 127.1 | 7.09  | 4.77  | 2 | 1 |
| -8.5E+18 | IsMasterProtein | A0A8C5A4Y1 | Uncharacterized protein OS=Gadus morhua OX=8049 PE=4 SV=1                                                               | 5  | 2 | 2 | 2 | 1039 | 114.5 | 5.94  | 5.84  | 2 | 1 |
| -8.5E+18 | IsMasterProtein | A0A8C5ATL6 | Sodium channel protein OS=Gadus morhua OX=8049 PE=3 SV=1                                                                | 2  | 2 | 2 | 2 | 1800 | 204.8 | 6.89  | 4.66  | 2 | 1 |
| -8.5E+18 | IsMasterProtein | A0A8C5F3D9 | Tyrosine-protein kinase receptor OS=Gadus morhua OX=8049 PE=3 SV=1                                                      | 2  | 2 | 2 | 2 | 1321 | 149   | 6.64  | 5.78  | 2 | 1 |
| -8.5E+18 | IsMasterProtein | A0A8C5B150 | Uncharacterized protein OS=Gadus morhua OX=8049 PE=3 SV=1                                                               | 3  | 2 | 3 | 2 | 1469 | 164.8 | 8.79  | 5.1   | 2 | 1 |
| -8.5E+18 | IsMasterProtein | A0A8C4ZC28 | UTP--glucose-1-phosphate uridylyltransferase OS=Gadus morhua OX=8049 GN=ugp2b PE=3 SV=1                                 | 9  | 2 | 2 | 2 | 552  | 62.2  | 8.35  | 5.41  | 2 | 1 |
| -8.5E+18 | IsMasterProtein | A0A8C5CDL1 | Pleckstrin homology domain containing A5 OS=Gadus morhua OX=8049 GN=PLEKHA5 PE=4 SV=1                                   | 3  | 2 | 2 | 2 | 1200 | 134.2 | 8.79  | 4.73  | 2 | 1 |
| -8.5E+18 | IsMasterProtein | A0A8C4ZYY7 | Adaptor related protein complex 1 subunit gamma 1 OS=Gadus morhua OX=8049 GN=ap1g1 PE=3 SV=1                            | 5  | 2 | 3 | 2 | 570  | 63.6  | 6.7   | 8.31  | 2 | 1 |
| -8.5E+18 | IsMasterProtein | A0A8C5CAG3 | Immunoglobulin lambda-1 light chain-like OS=Gadus morhua OX=8049 GN=LOC115559457 PE=4 SV=1                              | 7  | 2 | 2 | 2 | 243  | 26.4  | 7.31  | 4.22  | 2 | 1 |
| -8.5E+18 | IsMasterProtein | A0A8C5BXS2 | Myosin-7 OS=Gadus morhua OX=8049 GN=LOC115549163 PE=3 SV=1                                                              | 2  | 4 | 4 | 2 | 1940 | 223.4 | 5.64  | 8.97  | 4 | 1 |
| -8.5E+18 | IsMasterProtein | A0A8C4YTM8 | Mitochondrial translational initiation factor 3 OS=Gadus morhua OX=8049 GN=mtif3 PE=3 SV=1                              | 16 | 2 | 2 | 2 | 293  | 31.7  | 9.7   | 6.02  | 2 | 1 |
| -8.4E+18 | IsMasterProtein | A0A8C5FVP9 | Protein NDRG2 OS=Gadus morhua OX=8049 GN=ndrg2 PE=3 SV=1                                                                | 9  | 2 | 3 | 2 | 359  | 38.8  | 6.13  | 10.43 | 2 | 1 |
| -8.4E+18 | IsMasterProtein | A0A8C5FIT0 | Coiled-coil and C2 domain containing 1B OS=Gadus morhua OX=8049 GN=cc2d1b PE=4 SV=1                                     | 5  | 2 | 2 | 2 | 596  | 65.3  | 6.42  | 4.71  | 2 | 1 |
| -8.4E+18 | IsMasterProtein | A0A8C4ZYL2 | Nibrin OS=Gadus morhua OX=8049 GN=nb1 PE=4 SV=1                                                                         | 4  | 2 | 4 | 2 | 873  | 94.3  | 7.85  | 9.35  | 2 | 1 |
| -8.4E+18 | IsMasterProtein | A0A8C5F6B1 | DNA topoisomerase 2 OS=Gadus morhua OX=8049 GN=top2a PE=3 SV=1                                                          | 3  | 2 | 2 | 2 | 1291 | 146.2 | 8.65  | 5.09  | 2 | 1 |
| -8.4E+18 | IsMasterProtein | A0A8C5C496 | Interferon-induced, double-stranded RNA-activated protein kinase-like OS=Gadus morhua OX=8049 GN=LOC115560251 PE=4 SV=1 | 4  | 2 | 2 | 2 | 664  | 74.7  | 7.21  | 4.9   | 2 | 1 |
| -8.4E+18 | IsMasterProtein | A0A8C5AKU8 | Phosphoinositide phospholipase C OS=Gadus morhua OX=8049 GN=plcd4 PE=4 SV=1                                             | 5  | 2 | 2 | 2 | 729  | 83.2  | 6.3   | 4.59  | 2 | 1 |
| -8.4E+18 | IsMasterProtein | A0A8C5BC28 | 5'-3' exoribonuclease OS=Gadus morhua OX=8049 PE=3 SV=1                                                                 | 4  | 2 | 2 | 2 | 933  | 105.3 | 6.52  | 4.33  | 2 | 1 |
| -8.4E+18 | IsMasterProtein | A0A8C5ARY6 | Protein kinase C OS=Gadus morhua OX=8049 GN=prkd4 PE=3 SV=1                                                             | 9  | 3 | 5 | 2 | 845  | 93.9  | 7.87  | 11.79 | 3 | 1 |
| -8.4E+18 | IsMasterProtein | A0A8C4ZWE1 | Splicing factor 3b, subunit 1 OS=Gadus morhua OX=8049 GN=sf3b1 PE=3 SV=1                                                | 3  | 2 | 2 | 2 | 1196 | 133.3 | 6.42  | 5.03  | 2 | 1 |
| -8.4E+18 | IsMasterProtein | A0A8C4YU44 | ATP-citrate synthase OS=Gadus morhua OX=8049 GN=LOC115531001 PE=3 SV=1                                                  | 8  | 7 | 9 | 2 | 1064 | 116.3 | 7.27  | 25.16 | 7 | 1 |
| -8.4E+18 | IsMasterProtein | A0A8C5B709 | Nuclear factor of kappa light polypeptide gene enhancer in B-cells 1 OS=Gadus morhua OX=8049 GN=nfkb1 PE=4 SV=1         | 4  | 2 | 2 | 2 | 908  | 100.2 | 7.14  | 5.12  | 2 | 1 |
| -8.4E+18 | IsMasterProtein | A0A8C5C3K8 | Syntaxin binding protein 3 OS=Gadus morhua OX=8049 GN=stxbp3 PE=3 SV=1                                                  | 7  | 2 | 2 | 2 | 606  | 69    | 7.58  | 5.35  | 2 | 1 |
| -8.4E+18 | IsMasterProtein | A0A8C5FWM0 | Plakophilin 3a OS=Gadus morhua OX=8049 GN=PKP3 PE=3 SV=1                                                                | 5  | 2 | 2 | 2 | 857  | 93.1  | 8.69  | 5.11  | 2 | 1 |
| -8.4E+18 | IsMasterProtein | A0A8C5C391 | Isoleucine--tRNA ligase OS=Gadus morhua OX=8049 GN=iars2 PE=3 SV=1                                                      | 3  | 2 | 2 | 2 | 1038 | 115.4 | 6.37  | 4.26  | 2 | 1 |

|          |                 |            |                                                                                                    |    |   |   |   |      |       |       |       |   |   |
|----------|-----------------|------------|----------------------------------------------------------------------------------------------------|----|---|---|---|------|-------|-------|-------|---|---|
| -8.4E+18 | IsMasterProtein | A0A8C5D261 | Serine/arginine repetitive matrix protein 1-like OS=Gadus morhua OX=8049 GN=LOC115554003 PE=3 SV=1 | 3  | 2 | 2 | 2 | 956  | 107.6 | 9.74  | 4.81  | 2 | 1 |
| -8.4E+18 | IsMasterProtein | A0A8C5BVP1 | Obg-like ATPase 1 OS=Gadus morhua OX=8049 GN=OLA1 PE=3 SV=1                                        | 6  | 2 | 2 | 2 | 380  | 43    | 6.61  | 4.81  | 2 | 1 |
| -8.4E+18 | IsMasterProtein | A0A8C5F7R8 | Huntingtin OS=Gadus morhua OX=8049 PE=3 SV=1                                                       | 1  | 2 | 2 | 2 | 3141 | 344.7 | 6.16  | 4.06  | 2 | 1 |
| -8.4E+18 | IsMasterProtein | A0A8C5A8U5 | SIX homeobox 4a OS=Gadus morhua OX=8049 GN=six4a PE=4 SV=1                                         | 5  | 2 | 2 | 2 | 670  | 70.9  | 6.34  | 4.68  | 2 | 1 |
| -8.4E+18 | IsMasterProtein | A0A8C5BN10 | Ig-like domain-containing protein OS=Gadus morhua OX=8049 PE=4 SV=1                                | 31 | 2 | 2 | 2 | 110  | 12.1  | 6.27  | 5.99  | 2 | 1 |
| -8.3E+18 | IsMasterProtein | A0A8C5B340 | Rac family small GTPase 3 OS=Gadus morhua OX=8049 PE=4 SV=1                                        | 11 | 2 | 3 | 2 | 188  | 21.2  | 8.51  | 7.55  | 2 | 1 |
| -8.3E+18 | IsMasterProtein | A0A8C5A6N7 | Glutamate receptor OS=Gadus morhua OX=8049 GN=GRIK1 PE=3 SV=1                                      | 6  | 2 | 2 | 2 | 855  | 96.3  | 6.68  | 6.43  | 2 | 1 |
| -8.3E+18 | IsMasterProtein | A0A8C5FF49 | Plexin A1 OS=Gadus morhua OX=8049 GN=plxna1 PE=3 SV=1                                              | 3  | 2 | 2 | 2 | 1893 | 211.5 | 7.11  | 5.38  | 2 | 1 |
| -8.3E+18 | IsMasterProtein | A0A8C5AN60 | Citron rho-interacting serine/threonine kinase b OS=Gadus morhua OX=8049 PE=4 SV=1                 | 3  | 3 | 3 | 2 | 1554 | 176.3 | 6.35  | 7.83  | 3 | 1 |
| -8.3E+18 | IsMasterProtein | A0A8C5A3K4 | Phosphodiesterase OS=Gadus morhua OX=8049 GN=pde4ca PE=3 SV=1                                      | 5  | 2 | 2 | 2 | 740  | 82.7  | 5.11  | 4.93  | 2 | 1 |
| -8.3E+18 | IsMasterProtein | A0A8C5CHN7 | SRSF protein kinase 3-like OS=Gadus morhua OX=8049 GN=LOC115557309 PE=4 SV=1                       | 6  | 2 | 2 | 2 | 528  | 58.5  | 6.58  | 4.81  | 2 | 1 |
| -8.3E+18 | IsMasterProtein | A0A8C5BBW8 | Carbohydrate sulfotransferase OS=Gadus morhua OX=8049 PE=3 SV=1                                    | 8  | 2 | 5 | 2 | 447  | 51.7  | 9.51  | 12.87 | 2 | 1 |
| -8.3E+18 | IsMasterProtein | A0A8C5FXJ4 | Carboxylic ester hydrolase OS=Gadus morhua OX=8049 GN=si:ch211-71n6.4 PE=3 SV=1                    | 8  | 2 | 2 | 2 | 591  | 64.8  | 5.41  | 5.72  | 2 | 1 |
| -8.2E+18 | IsMasterProtein | A0A8C5FGR0 | Collagen, type VI, alpha 3 OS=Gadus morhua OX=8049 GN=COL6A3 PE=4 SV=1                             | 2  | 2 | 2 | 2 | 3221 | 346.3 | 5.94  | 6.64  | 2 | 1 |
| -8.2E+18 | IsMasterProtein | A0A8C4YX13 | Dual specificity protein phosphatase OS=Gadus morhua OX=8049 PE=3 SV=1                             | 20 | 2 | 2 | 2 | 183  | 20.2  | 10.05 | 5.35  | 2 | 1 |
| -8.2E+18 | IsMasterProtein | A0A8C5CUM5 | Cold shock domain containing E1, RNA-binding OS=Gadus morhua OX=8049 GN=CSDE1 PE=4 SV=1            | 5  | 2 | 2 | 2 | 850  | 93.8  | 6.83  | 5.13  | 2 | 1 |
| -8.2E+18 | IsMasterProtein | A0A8C5C9U8 | Uncharacterized protein OS=Gadus morhua OX=8049 PE=3 SV=1                                          | 2  | 2 | 2 | 2 | 1728 | 187.2 | 4.89  | 5.66  | 2 | 1 |
| -8.2E+18 | IsMasterProtein | A0A8C5B7G7 | Uncharacterized protein OS=Gadus morhua OX=8049 PE=3 SV=1                                          | 5  | 2 | 2 | 2 | 889  | 99.7  | 6.86  | 5.65  | 2 | 1 |
| -8.2E+18 | IsMasterProtein | A0A8C4ZB14 | Peptidase M20 domain containing 1, tandem duplicate 2 OS=Gadus morhua OX=8049 PE=4 SV=1            | 6  | 2 | 3 | 2 | 521  | 57.8  | 6.7   | 7.61  | 2 | 1 |
| -8.2E+18 | IsMasterProtein | A0A8C5AG06 | Neurexin-2-like OS=Gadus morhua OX=8049 GN=LOC115546740 PE=4 SV=1                                  | 2  | 2 | 2 | 2 | 1654 | 179.4 | 6.15  | 4.32  | 2 | 1 |
| -8.2E+18 | IsMasterProtein | A0A8C5AVZ9 | Uncharacterized protein OS=Gadus morhua OX=8049 PE=4 SV=1                                          | 6  | 2 | 2 | 2 | 962  | 106.7 | 6.84  | 5.44  | 2 | 1 |
| -8.2E+18 | IsMasterProtein | A0A8C5CQL5 | Uncharacterized protein OS=Gadus morhua OX=8049 PE=4 SV=1                                          | 5  | 2 | 2 | 2 | 910  | 100.9 | 8.24  | 5.25  | 2 | 1 |
| -8.2E+18 | IsMasterProtein | A0A8C4YZH9 | Si:ch211-66e2.5 OS=Gadus morhua OX=8049 PE=4 SV=1                                                  | 8  | 2 | 2 | 2 | 320  | 35.5  | 6.14  | 5.98  | 2 | 1 |
| -8.2E+18 | IsMasterProtein | A0A8C5BC20 | Rho GTPase activating protein 17a OS=Gadus morhua OX=8049 GN=arhgap17a PE=4 SV=1                   | 5  | 2 | 2 | 2 | 893  | 95.8  | 7.14  | 5.51  | 2 | 1 |
| -8.1E+18 | IsMasterProtein | A0A8C4ZIU8 | Acyl-CoA thioesterase 8 OS=Gadus morhua OX=8049 GN=acot8 PE=3 SV=1                                 | 7  | 2 | 3 | 2 | 321  | 36.4  | 7.81  | 7.56  | 2 | 1 |
| -8.1E+18 | IsMasterProtein | A0A8C5CF76 | Microtubule-associated protein 1Aa OS=Gadus morhua OX=8049 GN=map1aa PE=4 SV=1                     | 2  | 2 | 2 | 2 | 2756 | 302.6 | 4.88  | 4.75  | 2 | 1 |
| -8.1E+18 | IsMasterProtein | A0A8C4Z2Y9 | Profilin OS=Gadus morhua OX=8049 GN=LOC115555837 PE=3 SV=1                                         | 19 | 2 | 2 | 2 | 139  | 15    | 6.54  | 5.57  | 2 | 1 |
| -8.1E+18 | IsMasterProtein | A0A8C5CVQ0 | Uncharacterized protein OS=Gadus morhua OX=8049 PE=4 SV=1                                          | 3  | 3 | 3 | 2 | 1207 | 136.1 | 6.52  | 7.71  | 3 | 1 |
| -8.1E+18 | IsMasterProtein | A0A8C4ZBL4 | Myelin transcription factor 1a OS=Gadus morhua OX=8049 PE=3 SV=1                                   | 6  | 2 | 2 | 2 | 770  | 84.4  | 6.92  | 6.21  | 2 | 1 |
| -8.1E+18 | IsMasterProtein | A0A8C5FLX1 | Calcium dependent secretion activator 2 OS=Gadus morhua OX=8049 GN=CADPS2 PE=4 SV=1                | 3  | 2 | 2 | 2 | 1268 | 143   | 6.19  | 4.93  | 2 | 1 |
| -8.1E+18 | IsMasterProtein | A0A8C4Z636 | Fraser extracellular matrix complex subunit 1 OS=Gadus morhua OX=8049 PE=3 SV=1                    | 1  | 2 | 2 | 2 | 3608 | 394.7 | 5.91  | 5.39  | 2 | 1 |
| -8.1E+18 | IsMasterProtein | A0A8C5ADV9 | Hematopoietic cell-specific Lyn substrate 1 OS=Gadus morhua OX=8049 PE=4 SV=1                      | 6  | 2 | 2 | 2 | 419  | 46.2  | 5.78  | 4.5   | 2 | 1 |
| -8.1E+18 | IsMasterProtein | A0A8C5FUX6 | Exocyst complex component 3-like 2b OS=Gadus morhua OX=8049 PE=3 SV=1                              | 4  | 2 | 2 | 2 | 886  | 99.1  | 7.65  | 5.17  | 2 | 1 |
| -8.1E+18 | IsMasterProtein | A0A8C4Z7F8 | NHL repeat containing 2 OS=Gadus morhua OX=8049 GN=nhlrc2 PE=4 SV=1                                | 2  | 2 | 2 | 2 | 718  | 76.4  | 5.71  | 5.37  | 2 | 1 |
| -8.1E+18 | IsMasterProtein | A0A8C5AZK6 | Purine nucleoside phosphorylase OS=Gadus morhua OX=8049 PE=3 SV=1                                  | 19 | 2 | 2 | 2 | 267  | 29.2  | 5.44  | 5.99  | 2 | 1 |
| -8.1E+18 | IsMasterProtein | A0A8C5B8V4 | Zinc finger protein 770 OS=Gadus morhua OX=8049 GN=znf770 PE=4 SV=1                                | 6  | 2 | 2 | 2 | 1001 | 113.5 | 8.07  | 5.09  | 2 | 1 |
| -8.1E+18 | IsMasterProtein | A0A8C5AGU8 | T-complex protein 1 subunit delta OS=Gadus morhua OX=8049 GN=cct4 PE=3 SV=1                        | 8  | 2 | 2 | 2 | 505  | 54.4  | 7.14  | 7.52  | 2 | 1 |

|          |                 |            |                                                                                                |    |   |   |   |      |       |       |       |   |   |
|----------|-----------------|------------|------------------------------------------------------------------------------------------------|----|---|---|---|------|-------|-------|-------|---|---|
| -8.1E+18 | IsMasterProtein | A0A8C5FNR2 | Actin-related protein 2/3 complex subunit OS=Gadus morhua OX=8049 GN=arpc1a PE=3 SV=1          | 16 | 2 | 2 | 2 | 372  | 41.3  | 8.24  | 5.77  | 2 | 1 |
| -8.1E+18 | IsMasterProtein | A0A8C5A220 | Uncharacterized protein OS=Gadus morhua OX=8049 PE=4 SV=1                                      | 7  | 2 | 2 | 2 | 586  | 62.6  | 10.71 | 5.24  | 2 | 1 |
| -8.1E+18 | IsMasterProtein | A0A8C5BV09 | RRM domain-containing protein OS=Gadus morhua OX=8049 PE=4 SV=1                                | 10 | 2 | 2 | 2 | 309  | 35.7  | 11.37 | 4.71  | 2 | 1 |
| -8.1E+18 | IsMasterProtein | A0A8C5B0P3 | Phospholipid-transporting ATPase OS=Gadus morhua OX=8049 PE=3 SV=1                             | 3  | 2 | 2 | 2 | 1083 | 123   | 6.8   | 5.09  | 2 | 1 |
| -8.1E+18 | IsMasterProtein | A0A8C4ZCY3 | Receptor protein-tyrosine kinase OS=Gadus morhua OX=8049 PE=3 SV=1                             | 4  | 2 | 2 | 2 | 883  | 98.1  | 6.61  | 4.1   | 2 | 1 |
| -8.1E+18 | IsMasterProtein | A0A8C4Z4R0 | Coiled-coil serine-rich protein 1 OS=Gadus morhua OX=8049 GN=ccser1 PE=3 SV=1                  | 3  | 2 | 3 | 2 | 1072 | 112.6 | 7.47  | 6.87  | 2 | 1 |
| -8E+18   | IsMasterProtein | A0A8C5AFI5 | Methenyltetrahydrofolate cyclohydrolase OS=Gadus morhua OX=8049 GN=mtfhd2 PE=3 SV=1            | 14 | 2 | 2 | 2 | 318  | 34.5  | 8.06  | 4.99  | 2 | 1 |
| -8E+18   | IsMasterProtein | A0A8C5F3V5 | Tripartite motif containing 8b OS=Gadus morhua OX=8049 GN=TRIM8 PE=4 SV=1                      | 9  | 2 | 2 | 2 | 595  | 65.2  | 7.53  | 5.93  | 2 | 1 |
| -8E+18   | IsMasterProtein | A0A8C5C7D0 | Extended synaptotagmin-like protein 2a OS=Gadus morhua OX=8049 PE=4 SV=1                       | 6  | 2 | 2 | 2 | 816  | 89.9  | 8.44  | 5.6   | 2 | 1 |
| -8E+18   | IsMasterProtein | A0A8C5FUZ6 | Uncharacterized protein OS=Gadus morhua OX=8049 PE=4 SV=1                                      | 7  | 4 | 4 | 2 | 1156 | 128.5 | 5.91  | 10.85 | 4 | 1 |
| -8E+18   | IsMasterProtein | A0A8C5BDN9 | ATPase H+ transporting V1 subunit H OS=Gadus morhua OX=8049 GN=oprk1 PE=3 SV=1                 | 7  | 2 | 2 | 2 | 526  | 60.4  | 6.07  | 6.87  | 2 | 1 |
| -8E+18   | IsMasterProtein | A0A8C5ANK8 | Glutathione reductase OS=Gadus morhua OX=8049 GN=gsr PE=3 SV=1                                 | 7  | 2 | 2 | 2 | 497  | 53.6  | 7.08  | 5.55  | 2 | 1 |
| -8E+18   | IsMasterProtein | A0A8C4ZDG8 | Hydroxymethylbilane synthase OS=Gadus morhua OX=8049 GN=hmbS PE=3 SV=1                         | 6  | 2 | 2 | 2 | 359  | 39.2  | 6.67  | 5.79  | 2 | 1 |
| -8E+18   | IsMasterProtein | A0A8C5ATF8 | Fibrosin-like 1 OS=Gadus morhua OX=8049 GN=fbrsl1 PE=4 SV=1                                    | 2  | 2 | 2 | 2 | 1307 | 145   | 9.69  | 5.06  | 2 | 1 |
| -8E+18   | IsMasterProtein | A0A8C5CC41 | Zinc finger protein 451 OS=Gadus morhua OX=8049 GN=znf451 PE=4 SV=1                            | 6  | 2 | 2 | 2 | 830  | 90.5  | 7.36  | 5     | 2 | 1 |
| -8E+18   | IsMasterProtein | A0A8C4ZMN1 | Cytosolic phospholipase A2 gamma-like OS=Gadus morhua OX=8049 GN=LOC115559240 PE=4 SV=1        | 5  | 2 | 3 | 2 | 681  | 76.6  | 6.14  | 6.87  | 2 | 1 |
| -8E+18   | IsMasterProtein | A0A8C5AE03 | SCY1 like pseudokinase 2 OS=Gadus morhua OX=8049 GN=scyl2 PE=4 SV=1                            | 3  | 2 | 2 | 2 | 922  | 101.5 | 8.66  | 5.15  | 2 | 1 |
| -8E+18   | IsMasterProtein | A0A8C5CET3 | VWFA domain-containing protein OS=Gadus morhua OX=8049 PE=4 SV=1                               | 11 | 2 | 2 | 2 | 489  | 53.1  | 6.15  | 5.39  | 2 | 1 |
| -7.9E+18 | IsMasterProtein | A0A8C5FED7 | Matrix metalloproteinase-9 OS=Gadus morhua OX=8049 GN=LOC115561406 PE=3 SV=1                   | 4  | 2 | 3 | 2 | 653  | 72.9  | 5.44  | 8.76  | 2 | 1 |
| -7.9E+18 | IsMasterProtein | A0A8C5BVC5 | Protein phosphatase, Mg2+/Mn2+ dependent, 1Bb OS=Gadus morhua OX=8049 GN=ppm1bb PE=3 SV=1      | 6  | 2 | 2 | 2 | 378  | 41    | 5.36  | 5.52  | 2 | 1 |
| -7.9E+18 | IsMasterProtein | A0A8C4YZH0 | Charged multivesicular body protein 2A OS=Gadus morhua OX=8049 GN=chmp2a PE=3 SV=1             | 8  | 2 | 2 | 2 | 220  | 24.9  | 5.66  | 4.26  | 2 | 1 |
| -7.9E+18 | IsMasterProtein | A0A8C4ZUP7 | SKI/DACH domain containing 1 OS=Gadus morhua OX=8049 GN=SKIDA1 PE=4 SV=1                       | 3  | 2 | 2 | 2 | 835  | 92.9  | 8.81  | 5.21  | 2 | 1 |
| -7.9E+18 | IsMasterProtein | A0A8C4Z8D3 | Creatine kinase OS=Gadus morhua OX=8049 GN=ckba PE=3 SV=1                                      | 9  | 3 | 4 | 2 | 377  | 42.3  | 6.77  | 12.77 | 3 | 1 |
| -7.9E+18 | IsMasterProtein | A0A8C5C0G7 | Laminin, beta 2 (laminin S) OS=Gadus morhua OX=8049 GN=lamb2 PE=4 SV=1                         | 3  | 2 | 2 | 2 | 1783 | 194.6 | 6.52  | 6.12  | 2 | 1 |
| -7.9E+18 | IsMasterProtein | A0A8C5AQW6 | Kelch-like ECH-associated protein 1a OS=Gadus morhua OX=8049 GN=keap1a PE=4 SV=1               | 5  | 2 | 2 | 2 | 605  | 66    | 6.7   | 5.05  | 2 | 1 |
| -7.9E+18 | IsMasterProtein | A0A8C5BT24 | Uncharacterized protein OS=Gadus morhua OX=8049 PE=4 SV=1                                      | 5  | 2 | 2 | 2 | 1040 | 116.5 | 8.12  | 5.62  | 2 | 1 |
| -7.9E+18 | IsMasterProtein | A0A8C5FCA7 | Phosphodiesterase OS=Gadus morhua OX=8049 GN=pde6c PE=3 SV=1                                   | 4  | 2 | 2 | 2 | 833  | 95.4  | 5.59  | 5.18  | 2 | 1 |
| -7.9E+18 | IsMasterProtein | A0A8C5A063 | Pecanex-like protein OS=Gadus morhua OX=8049 PE=3 SV=1                                         | 3  | 2 | 2 | 2 | 1679 | 187.9 | 6.16  | 6.36  | 2 | 1 |
| -7.9E+18 | IsMasterProtein | A0A8C5AFM5 | Sodium/potassium-transporting ATPase subunit alpha OS=Gadus morhua OX=8049 GN=atp4a PE=3 SV=1  | 6  | 4 | 4 | 2 | 1013 | 112.9 | 5.69  | 10    | 4 | 1 |
| -7.9E+18 | IsMasterProtein | A0A8C5A3E9 | Uncharacterized protein OS=Gadus morhua OX=8049 PE=3 SV=1                                      | 2  | 2 | 2 | 2 | 1725 | 189   | 8.44  | 4.32  | 2 | 1 |
| -7.9E+18 | IsMasterProtein | A0A8C5C6Z0 | S-(hydroxymethyl)glutathione dehydrogenase OS=Gadus morhua OX=8049 GN=LOC115552326 PE=3 SV=1   | 5  | 2 | 2 | 2 | 372  | 39.5  | 6.83  | 4.3   | 2 | 1 |
| -7.9E+18 | IsMasterProtein | A0A8C5FQ80 | Non-specific serine/threonine protein kinase OS=Gadus morhua OX=8049 GN=LOC115549230 PE=3 SV=1 | 8  | 2 | 2 | 2 | 439  | 49.1  | 8.31  | 4.61  | 2 | 1 |
| -7.9E+18 | IsMasterProtein | A0A8C5A1M6 | Cyclic nucleotide-binding domain-containing protein OS=Gadus morhua OX=8049 PE=3 SV=1          | 4  | 2 | 2 | 2 | 825  | 91.9  | 9.51  | 5.05  | 2 | 1 |
| -7.9E+18 | IsMasterProtein | A0A8C5C4Z9 | Sphingomyelin phosphodiesterase 4 OS=Gadus morhua OX=8049 GN=smpd4 PE=4 SV=1                   | 6  | 2 | 2 | 2 | 817  | 91.2  | 8.92  | 6.15  | 2 | 1 |
| -7.8E+18 | IsMasterProtein | A0A8C4ZHS0 | BTB domain-containing protein OS=Gadus morhua OX=8049 PE=4 SV=1                                | 6  | 2 | 2 | 2 | 589  | 66.2  | 5.74  | 4.8   | 2 | 1 |

|          |                 |            |                                                                                                                     |    |    |    |   |      |       |       |       |    |   |
|----------|-----------------|------------|---------------------------------------------------------------------------------------------------------------------|----|----|----|---|------|-------|-------|-------|----|---|
| -7.8E+18 | IsMasterProtein | A0A8C4ZSE8 | Uncharacterized protein OS=Gadus morhua OX=8049 PE=4 SV=1                                                           | 13 | 2  | 2  | 2 | 368  | 39.8  | 7.25  | 5.82  | 2  | 1 |
| -7.8E+18 | IsMasterProtein | A0A8C5C4U3 | Fibrosin OS=Gadus morhua OX=8049 PE=4 SV=1                                                                          | 3  | 2  | 2  | 2 | 1329 | 142.1 | 10.13 | 4.88  | 2  | 1 |
| -7.8E+18 | IsMasterProtein | A0A8C5FQM0 | ADP-ribosylation factor OS=Gadus morhua OX=8049 GN=arf3a PE=3 SV=1                                                  | 23 | 3  | 4  | 2 | 181  | 20.6  | 7.43  | 10.36 | 3  | 1 |
| -7.8E+18 | IsMasterProtein | A0A8C5AC58 | SLIT-ROBO Rho GTPase activating protein 3 OS=Gadus morhua OX=8049 GN=srgap3 PE=4 SV=1                               | 2  | 2  | 2  | 2 | 990  | 111.5 | 6.79  | 4.14  | 2  | 1 |
| -7.8E+18 | IsMasterProtein | A0A8C5AZ49 | Uncharacterized protein OS=Gadus morhua OX=8049 PE=3 SV=1                                                           | 8  | 2  | 3  | 2 | 680  | 77.2  | 7.62  | 9.29  | 2  | 1 |
| -7.8E+18 | IsMasterProtein | A0A8C5BU43 | von Willebrand factor OS=Gadus morhua OX=8049 GN=vwf PE=4 SV=1                                                      | 2  | 2  | 3  | 2 | 2849 | 308.5 | 6.09  | 8.29  | 2  | 1 |
| -7.8E+18 | IsMasterProtein | A0A8C5C0Q8 | Mitochondrial intermediate peptidase a OS=Gadus morhua OX=8049 GN=MIPEP PE=3 SV=1                                   | 5  | 2  | 3  | 2 | 704  | 80    | 7.17  | 8.52  | 2  | 1 |
| -7.8E+18 | IsMasterProtein | A0A8C5BDS1 | Spliceosome associated factor 3, U4/U6 recycling protein OS=Gadus morhua OX=8049 PE=4 SV=1                          | 5  | 2  | 3  | 2 | 918  | 104.2 | 5.45  | 7.88  | 2  | 1 |
| -7.8E+18 | IsMasterProtein | A0A8C4YVG6 | Mitogen-activated protein kinase kinase kinase OS=Gadus morhua OX=8049 GN=MAP3K12 PE=3 SV=1                         | 7  | 2  | 2  | 2 | 725  | 80.2  | 7.03  | 5.87  | 2  | 1 |
| -7.8E+18 | IsMasterProtein | A0A8C5AAH8 | Phosphatidylinositol-3,4,5-trisphosphate-dependent Rac exchange factor 2 OS=Gadus morhua OX=8049 GN=prex2 PE=4 SV=1 | 2  | 2  | 2  | 2 | 1440 | 162.9 | 8.43  | 4.73  | 2  | 1 |
| -7.8E+18 | IsMasterProtein | A0A8C4ZRA6 | Mitochondrial ribosomal protein L48 OS=Gadus morhua OX=8049 GN=mrpl48 PE=4 SV=1                                     | 20 | 2  | 3  | 2 | 215  | 24.6  | 9.55  | 6.02  | 2  | 1 |
| -7.8E+18 | IsMasterProtein | A0A8C4Z574 | Chaperonin containing TCP1, subunit 6A (zeta 1) OS=Gadus morhua OX=8049 GN=cct6a PE=3 SV=1                          | 4  | 2  | 2  | 2 | 531  | 57.6  | 7.15  | 5.62  | 2  | 1 |
| -7.8E+18 | IsMasterProtein | A0A8C4Z782 | Nucleobindin 1 OS=Gadus morhua OX=8049 GN=nucb1 PE=4 SV=1                                                           | 29 | 12 | 13 | 2 | 449  | 53    | 5.62  | 38.97 | 12 | 1 |
| -7.8E+18 | IsMasterProtein | A0A8C4ZDZ9 | Actin-related protein 2/3 complex subunit 5 OS=Gadus morhua OX=8049 GN=arpe5b PE=3 SV=1                             | 33 | 2  | 2  | 2 | 150  | 16.7  | 5.26  | 6.17  | 2  | 1 |
| -7.7E+18 | IsMasterProtein | A0A8C4Z7N4 | Lysine (K)-specific demethylase 6A OS=Gadus morhua OX=8049 GN=kdm6a PE=4 SV=1                                       | 4  | 2  | 2  | 2 | 1366 | 148.3 | 8.12  | 6.6   | 2  | 1 |
| -7.7E+18 | IsMasterProtein | A0A8C4Z9D2 | AT-rich interactive domain-containing protein 3B-like OS=Gadus morhua OX=8049 GN=LOC115558176 PE=4 SV=1             | 10 | 2  | 3  | 2 | 633  | 67.5  | 5.9   | 9.37  | 2  | 1 |
| -7.7E+18 | IsMasterProtein | A0A8C5FV16 | Solute carrier family 26 member 6, like OS=Gadus morhua OX=8049 PE=3 SV=1                                           | 5  | 2  | 2  | 2 | 814  | 89.3  | 7.71  | 5.5   | 2  | 1 |
| -7.7E+18 | IsMasterProtein | A0A8C5BRU0 | Cullin-associated and neddylation-dissociated 1 OS=Gadus morhua OX=8049 GN=CAND1 PE=3 SV=1                          | 2  | 2  | 2  | 2 | 1235 | 136.4 | 5.82  | 5.2   | 2  | 1 |
| -7.7E+18 | IsMasterProtein | A0A8C4ZMF3 | Developmentally regulated GTP binding protein 1 OS=Gadus morhua OX=8049 GN=drgl1 PE=4 SV=1                          | 8  | 2  | 2  | 2 | 372  | 41.2  | 8.54  | 4.98  | 2  | 1 |
| -7.7E+18 | IsMasterProtein | A0A8C5C2Q7 | Protein SON-like OS=Gadus morhua OX=8049 GN=LOC115542266 PE=4 SV=1                                                  | 3  | 2  | 2  | 2 | 1347 | 144.3 | 10.95 | 5.27  | 2  | 1 |
| -7.7E+18 | IsMasterProtein | A0A8C5ATG5 | Uncharacterized protein OS=Gadus morhua OX=8049 PE=4 SV=1                                                           | 3  | 2  | 2  | 2 | 1434 | 155.1 | 8.88  | 5.66  | 2  | 1 |
| -7.7E+18 | IsMasterProtein | A0A8C4ZES6 | Ras-related protein rab7-like OS=Gadus morhua OX=8049 GN=LOC115557352 PE=4 SV=1                                     | 18 | 2  | 2  | 2 | 134  | 15.2  | 8.82  | 5.49  | 2  | 1 |
| -7.7E+18 | IsMasterProtein | A0A8C4Z877 | UDP-glucuronosyltransferase OS=Gadus morhua OX=8049 PE=3 SV=1                                                       | 9  | 2  | 2  | 2 | 375  | 41.4  | 6.46  | 5.32  | 2  | 1 |
| -7.7E+18 | IsMasterProtein | A0A8C5CUD1 | Uncharacterized protein OS=Gadus morhua OX=8049 PE=4 SV=1                                                           | 2  | 2  | 2  | 2 | 1343 | 150.5 | 5     | 5.66  | 2  | 1 |
| -7.7E+18 | IsMasterProtein | A0A8C5FNL0 | Chitin synthase OS=Gadus morhua OX=8049 PE=4 SV=1                                                                   | 4  | 2  | 2  | 2 | 913  | 102.1 | 8.84  | 5.6   | 2  | 1 |
| -7.7E+18 | IsMasterProtein | A0A8C5FJ60 | Uncharacterized protein OS=Gadus morhua OX=8049 PE=3 SV=1                                                           | 1  | 2  | 2  | 2 | 1636 | 186.5 | 7.93  | 4.65  | 2  | 1 |
| -7.7E+18 | IsMasterProtein | A0A8C5A5H9 | Epidermal growth factor receptor substrate 15-like 1 OS=Gadus morhua OX=8049 GN=LOC115548377 PE=4 SV=1              | 5  | 2  | 3  | 2 | 842  | 92.4  | 5.19  | 7.91  | 2  | 1 |
| -7.7E+18 | IsMasterProtein | A0A8C5F9E2 | Uncharacterized protein OS=Gadus morhua OX=8049 PE=4 SV=1                                                           | 24 | 2  | 2  | 2 | 201  | 22.2  | 9.95  | 5.56  | 2  | 1 |
| -7.7E+18 | IsMasterProtein | A0A8C5BMS2 | Rabaptin, RAB GTPase binding effector protein 1 OS=Gadus morhua OX=8049 GN=rabep1 PE=3 SV=1                         | 3  | 2  | 2  | 2 | 833  | 95.5  | 5.06  | 4.69  | 2  | 1 |
| -7.7E+18 | IsMasterProtein | A0A8C5CWS4 | Leucine--tRNA ligase OS=Gadus morhua OX=8049 GN=lars1b PE=3 SV=1                                                    | 3  | 2  | 2  | 2 | 1175 | 133.4 | 7.75  | 4.63  | 2  | 1 |
| -7.6E+18 | IsMasterProtein | A0A8C5CNH4 | Myoferlin like OS=Gadus morhua OX=8049 PE=3 SV=1                                                                    | 1  | 2  | 2  | 2 | 2091 | 237.7 | 5.76  | 4.53  | 2  | 1 |
| -7.6E+18 | IsMasterProtein | A0A8C5FAY7 | SIN3 transcription regulator family member Aa OS=Gadus morhua OX=8049 GN=sin3aa PE=4 SV=1                           | 3  | 2  | 2  | 2 | 1317 | 148.2 | 6.68  | 5.23  | 2  | 1 |
| -7.6E+18 | IsMasterProtein | A0A8C5CCT2 | SEC24 homolog C, COPII coat complex component OS=Gadus morhua OX=8049 GN=sec24c PE=3 SV=1                           | 3  | 2  | 2  | 2 | 1160 | 125.5 | 7.68  | 5.05  | 2  | 1 |
| -7.6E+18 | IsMasterProtein | A0A8C5C868 | Chorein N-terminal domain-containing protein OS=Gadus morhua OX=8049 PE=4 SV=1                                      | 4  | 2  | 2  | 2 | 1178 | 129.7 | 6.86  | 7.28  | 2  | 1 |
| -7.6E+18 | IsMasterProtein | A0A8C5F937 | Cyclin G associated kinase OS=Gadus morhua OX=8049 GN=gak PE=4 SV=1                                                 | 3  | 2  | 2  | 2 | 1261 | 139   | 5.78  | 5.22  | 2  | 1 |

|          |                 |            |                                                                                                              |    |   |   |   |      |       |       |       |   |   |
|----------|-----------------|------------|--------------------------------------------------------------------------------------------------------------|----|---|---|---|------|-------|-------|-------|---|---|
| -7.6E+18 | IsMasterProtein | A0A8C5CC94 | ArfGAP with RhoGAP domain, ankyrin repeat and PH domain 1 OS=Gadus morhua OX=8049 GN=arap1 PE=4 SV=1         | 2  | 2 | 2 | 2 | 1687 | 187.9 | 7.56  | 4.83  | 2 | 1 |
| -7.6E+18 | IsMasterProtein | A0A8C5FQT9 | Signal transducer and activator of transcription OS=Gadus morhua OX=8049 GN=LOC115533223 PE=3 SV=1           | 4  | 2 | 2 | 2 | 760  | 87.1  | 6.09  | 5.06  | 2 | 1 |
| -7.6E+18 | IsMasterProtein | A0A8C5AA45 | Uncharacterized protein OS=Gadus morhua OX=8049 PE=4 SV=1                                                    | 9  | 2 | 2 | 2 | 657  | 77.5  | 9.63  | 5.15  | 2 | 1 |
| -7.6E+18 | IsMasterProtein | A0A8C4Z100 | Spire-type actin nucleation factor 2 OS=Gadus morhua OX=8049 GN=spire2 PE=3 SV=1                             | 4  | 2 | 2 | 2 | 806  | 89.4  | 6.76  | 5.65  | 2 | 1 |
| -7.6E+18 | IsMasterProtein | A0A8C5FJZ0 | Lemur tyrosine kinase 2 OS=Gadus morhua OX=8049 GN=Imtk2 PE=4 SV=1                                           | 3  | 2 | 2 | 2 | 1541 | 169.4 | 4.46  | 5.45  | 2 | 1 |
| -7.5E+18 | IsMasterProtein | A0A8C5A3D6 | Arachidonate 15-lipoxygenase B-like OS=Gadus morhua OX=8049 GN=LOC115537321 PE=3 SV=1                        | 4  | 2 | 2 | 2 | 546  | 62.6  | 6.84  | 5.74  | 2 | 1 |
| -7.5E+18 | IsMasterProtein | A0A8C5FI60 | ATP-binding cassette, sub-family A (ABC1), member 4a OS=Gadus morhua OX=8049 PE=4 SV=1                       | 2  | 2 | 4 | 2 | 2214 | 248.6 | 7.25  | 10.5  | 2 | 1 |
| -7.5E+18 | IsMasterProtein | A0A8C5ANU6 | Inositol-1-monophosphatase OS=Gadus morhua OX=8049 PE=3 SV=1                                                 | 10 | 2 | 2 | 2 | 333  | 36.5  | 5.97  | 4.77  | 2 | 1 |
| -7.5E+18 | IsMasterProtein | A0A8C4ZP04 | Neurogenic locus notch homolog protein 1 OS=Gadus morhua OX=8049 GN=notch1a PE=3 SV=1                        | 2  | 2 | 2 | 2 | 2419 | 261   | 5.24  | 5.21  | 2 | 1 |
| -7.5E+18 | IsMasterProtein | A0A8C4Z3D2 | Protein C (inactivator of coagulation factors Va and VIIIa), a OS=Gadus morhua OX=8049 GN=proca PE=4 SV=1    | 6  | 3 | 3 | 2 | 444  | 49.1  | 5.77  | 7.45  | 3 | 1 |
| -7.5E+18 | IsMasterProtein | A0A8C5FRE8 | RING-type E3 ubiquitin transferase OS=Gadus morhua OX=8049 GN=ttc3 PE=4 SV=1                                 | 2  | 2 | 2 | 2 | 1691 | 191.2 | 7.75  | 5.11  | 2 | 1 |
| -7.5E+18 | IsMasterProtein | A0A8C5CNE4 | Zinc finger, CCHC domain containing 9 OS=Gadus morhua OX=8049 GN=xrcc4 PE=3 SV=1                             | 8  | 2 | 4 | 2 | 601  | 66.9  | 7.05  | 12.61 | 2 | 1 |
| -7.5E+18 | IsMasterProtein | A0A8C5FDY6 | Nuclear mitotic apparatus protein 1 OS=Gadus morhua OX=8049 GN=numa1 PE=4 SV=1                               | 1  | 2 | 2 | 2 | 2451 | 279.3 | 5.24  | 4.92  | 2 | 1 |
| -7.5E+18 | IsMasterProtein | A0A8C5BAC9 | Inositol-3-phosphate synthase OS=Gadus morhua OX=8049 GN=isyna1 PE=3 SV=1                                    | 7  | 2 | 2 | 2 | 560  | 61.1  | 5.9   | 6.82  | 2 | 1 |
| -7.5E+18 | IsMasterProtein | A0A8C5CVF1 | DENN domain containing 4B OS=Gadus morhua OX=8049 GN=DENND4B PE=4 SV=1                                       | 4  | 2 | 2 | 2 | 1356 | 152.2 | 8.13  | 5.6   | 2 | 1 |
| -7.5E+18 | IsMasterProtein | A0A8C5B7K4 | D-glutamate cyclase OS=Gadus morhua OX=8049 GN=dglucy PE=3 SV=1                                              | 6  | 2 | 2 | 2 | 631  | 67.2  | 6.14  | 5.19  | 2 | 1 |
| -7.5E+18 | IsMasterProtein | A0A8C4ZJ29 | Coproporphyrinogen oxidase OS=Gadus morhua OX=8049 GN=cpxo PE=3 SV=1                                         | 6  | 2 | 2 | 2 | 453  | 51.1  | 8.47  | 6.49  | 2 | 1 |
| -7.5E+18 | IsMasterProtein | A0A8C5F8H6 | TRPM8 channel-associated factor homolog OS=Gadus morhua OX=8049 GN=LOC115544376 PE=3 SV=1                    | 8  | 2 | 3 | 2 | 844  | 94.3  | 6.15  | 9.82  | 2 | 1 |
| -7.5E+18 | IsMasterProtein | A0A8C5A2D6 | Sequestosome 1 OS=Gadus morhua OX=8049 GN=sqstm1 PE=4 SV=1                                                   | 10 | 2 | 2 | 2 | 446  | 48.3  | 5.55  | 5.19  | 2 | 1 |
| -7.5E+18 | IsMasterProtein | A0A8C5C4J3 | E3 ubiquitin-protein ligase OS=Gadus morhua OX=8049 GN=wwp1 PE=4 SV=1                                        | 4  | 2 | 2 | 2 | 750  | 87.2  | 7.15  | 5.66  | 2 | 1 |
| -7.5E+18 | IsMasterProtein | A0A8C5BJM4 | Glutamate receptor OS=Gadus morhua OX=8049 GN=grik5 PE=3 SV=1                                                | 4  | 2 | 2 | 2 | 961  | 106.9 | 7.88  | 4.52  | 2 | 1 |
| -7.4E+18 | IsMasterProtein | A0A8C4ZK67 | MALT paracaspase 2 OS=Gadus morhua OX=8049 GN=malt2 PE=4 SV=1                                                | 13 | 2 | 2 | 2 | 552  | 62.1  | 5.35  | 6.19  | 2 | 1 |
| -7.4E+18 | IsMasterProtein | A0A8C4ZB58 | Small monomeric GTPase OS=Gadus morhua OX=8049 GN=LOC115542383 PE=3 SV=1                                     | 13 | 2 | 2 | 2 | 202  | 22.7  | 6.29  | 5.09  | 2 | 1 |
| -7.4E+18 | IsMasterProtein | A0A8C5CRT2 | Diaphanous-related formin 2 OS=Gadus morhua OX=8049 PE=3 SV=1                                                | 7  | 3 | 3 | 2 | 1079 | 121.6 | 6.51  | 8.24  | 3 | 1 |
| -7.4E+18 | IsMasterProtein | A0A8C5BSX5 | Uncharacterized protein OS=Gadus morhua OX=8049 PE=4 SV=1                                                    | 21 | 2 | 2 | 2 | 156  | 16.5  | 6.18  | 5.72  | 2 | 1 |
| -7.4E+18 | IsMasterProtein | A0A8C5FP18 | Ig-like domain-containing protein OS=Gadus morhua OX=8049 PE=4 SV=1                                          | 13 | 2 | 3 | 2 | 182  | 20.4  | 10.26 | 9.81  | 2 | 1 |
| -7.4E+18 | IsMasterProtein | A0A8C5FC61 | BTAFL1 RNA polymerase II, B-TFIID transcription factor-associated OS=Gadus morhua OX=8049 GN=btaf1 PE=4 SV=1 | 2  | 2 | 2 | 2 | 1857 | 207.3 | 6.93  | 4.68  | 2 | 1 |
| -7.4E+18 | IsMasterProtein | A0A8C4Z1N2 | Replication timing regulatory factor 1 OS=Gadus morhua OX=8049 PE=4 SV=1                                     | 1  | 2 | 2 | 2 | 2135 | 228.8 | 5.72  | 4.57  | 2 | 1 |
| -7.4E+18 | IsMasterProtein | A0A8C5BJR0 | Nardilysin b (N-arginine dibasic convertase) OS=Gadus morhua OX=8049 GN=nrd1b PE=3 SV=1                      | 4  | 2 | 2 | 2 | 1066 | 122.7 | 5.26  | 5.68  | 2 | 1 |
| -7.4E+18 | IsMasterProtein | A0A8C4Z6F1 | Actin-related protein 2/3 complex subunit 4 OS=Gadus morhua OX=8049 PE=3 SV=1                                | 9  | 2 | 2 | 2 | 177  | 20.7  | 7.9   | 4.42  | 2 | 1 |
| -7.4E+18 | IsMasterProtein | A0A8C5CD76 | Uncharacterized protein OS=Gadus morhua OX=8049 PE=3 SV=1                                                    | 2  | 2 | 2 | 2 | 2402 | 265.3 | 7.44  | 5.53  | 2 | 1 |
| -7.4E+18 | IsMasterProtein | A0A8C5ADF2 | Cytoplasmic aconitate hydratase OS=Gadus morhua OX=8049 GN=aco1 PE=3 SV=1                                    | 5  | 2 | 2 | 2 | 916  | 100.9 | 7.99  | 6.59  | 2 | 1 |
| -7.4E+18 | IsMasterProtein | A0A8C5BLN4 | Citron Rho-interacting kinase OS=Gadus morhua OX=8049 PE=3 SV=1                                              | 2  | 3 | 3 | 2 | 2059 | 235.4 | 6.51  | 7.3   | 3 | 1 |



|          |                 |            |                                                                                                                                                |    |   |   |   |      |       |       |       |   |   |
|----------|-----------------|------------|------------------------------------------------------------------------------------------------------------------------------------------------|----|---|---|---|------|-------|-------|-------|---|---|
| -7.4E+18 | IsMasterProtein | A0A8C5BWH1 | Eukaryotic translation initiation factor 2A OS=Gadus morhua OX=8049 PE=3 SV=1                                                                  | 10 | 2 | 2 | 2 | 538  | 59.4  | 8.81  | 5.55  | 2 | 1 |
| -7.4E+18 | IsMasterProtein | A0A8C5FMZ1 | Lon protease homolog, mitochondrial OS=Gadus morhua OX=8049 GN=LONP1 PE=3 SV=1                                                                 | 3  | 2 | 2 | 2 | 937  | 104.1 | 7.37  | 4.28  | 2 | 1 |
| -7.4E+18 | IsMasterProtein | A0A8C5C738 | Tankyrase_bdg_C domain-containing protein OS=Gadus morhua OX=8049 PE=4 SV=1                                                                    | 3  | 2 | 2 | 2 | 1081 | 129.4 | 5.03  | 5.91  | 2 | 1 |
| -7.4E+18 | IsMasterProtein | A0A8C5C3M4 | TAF7 RNA polymerase II, TATA box binding protein (TBP)-associated factor OS=Gadus morhua OX=8049 GN=taf7 PE=3 SV=1                             | 19 | 2 | 2 | 2 | 345  | 39.6  | 6.37  | 5.28  | 2 | 1 |
| -7.4E+18 | IsMasterProtein | A0A8C5FNC2 | Gamma-crystallin M3-like OS=Gadus morhua OX=8049 GN=LOC115547421 PE=3 SV=1                                                                     | 20 | 2 | 2 | 2 | 202  | 23.6  | 7.81  | 5.36  | 2 | 1 |
| -7.4E+18 | IsMasterProtein | A0A8C5C1U5 | Myosin VB OS=Gadus morhua OX=8049 GN=myo5b PE=3 SV=1                                                                                           | 3  | 2 | 2 | 2 | 1740 | 200.5 | 8.66  | 5.1   | 2 | 1 |
| -7.4E+18 | IsMasterProtein | A0A8C5F6B9 | [Histone H3]-trimethyl-L-lysine(9) demethylase OS=Gadus morhua OX=8049 GN=kdm4aa PE=3 SV=1                                                     | 9  | 3 | 3 | 2 | 853  | 97.3  | 6.77  | 8.47  | 3 | 1 |
| -7.4E+18 | IsMasterProtein | A0A8C4ZEL1 | 60S ribosomal protein L6 OS=Gadus morhua OX=8049 GN=rpl6 PE=3 SV=1                                                                             | 8  | 2 | 2 | 2 | 261  | 29.7  | 10.98 | 4.96  | 2 | 1 |
| -7.3E+18 | IsMasterProtein | A0A8C5AUW1 | Chitin synthase OS=Gadus morhua OX=8049 PE=4 SV=1                                                                                              | 2  | 2 | 2 | 2 | 1353 | 154.6 | 7.2   | 4.28  | 2 | 1 |
| -7.3E+18 | IsMasterProtein | A0A8C5C6R9 | SUMO specific peptidase 2 OS=Gadus morhua OX=8049 GN=senp2 PE=3 SV=1                                                                           | 7  | 2 | 2 | 2 | 611  | 68    | 9.44  | 4.95  | 2 | 1 |
| -7.3E+18 | IsMasterProtein | A0A8C4Z6U2 | GLI family zinc finger 1 OS=Gadus morhua OX=8049 GN=gli1 PE=3 SV=1                                                                             | 2  | 2 | 2 | 2 | 1470 | 157.4 | 7.84  | 4.37  | 2 | 1 |
| -7.3E+18 | IsMasterProtein | A0A8C4ZI55 | Marker of proliferation Ki-67 OS=Gadus morhua OX=8049 GN=mki67 PE=4 SV=1                                                                       | 2  | 2 | 2 | 2 | 1536 | 163.6 | 7.93  | 5.9   | 2 | 1 |
| -7.3E+18 | IsMasterProtein | A0A8C5BJB4 | Uncharacterized protein OS=Gadus morhua OX=8049 PE=4 SV=1                                                                                      | 36 | 2 | 2 | 2 | 108  | 11.9  | 9.19  | 6.1   | 2 | 1 |
| -7.3E+18 | IsMasterProtein | A0A8C5CIZ7 | Kinase OS=Gadus morhua OX=8049 GN=itpkcb PE=3 SV=1                                                                                             | 5  | 2 | 2 | 2 | 682  | 75    | 6.02  | 4.95  | 2 | 1 |
| -7.3E+18 | IsMasterProtein | A0A8C5CKJ2 | Nicotinamide phosphoribosyltransferase OS=Gadus morhua OX=8049 GN=nampt1 PE=3 SV=1                                                             | 7  | 2 | 2 | 2 | 489  | 55    | 6.95  | 7.54  | 2 | 1 |
| -7.3E+18 | IsMasterProtein | A0A8C5CQR9 | DNA helicase OS=Gadus morhua OX=8049 PE=3 SV=1                                                                                                 | 2  | 2 | 2 | 2 | 2737 | 303.9 | 6.73  | 6.63  | 2 | 1 |
| -7.3E+18 | IsMasterProtein | A0A8C5B7R9 | DIX domain-containing protein OS=Gadus morhua OX=8049 PE=4 SV=1                                                                                | 4  | 2 | 2 | 2 | 680  | 76.9  | 6.83  | 4.69  | 2 | 1 |
| -7.3E+18 | IsMasterProtein | A0A8C4ZRW1 | Vimentin OS=Gadus morhua OX=8049 GN=vim PE=3 SV=1                                                                                              | 6  | 2 | 2 | 2 | 455  | 52.8  | 5.16  | 5.59  | 2 | 1 |
| -7.3E+18 | IsMasterProtein | A0A8C4Z8I6 | Non-specific serine/threonine protein kinase OS=Gadus morhua OX=8049 GN=csnk1g1 PE=3 SV=1                                                      | 9  | 2 | 2 | 2 | 427  | 48.7  | 9.22  | 5.19  | 2 | 1 |
| -7.3E+18 | IsMasterProtein | A0A8C4ZF11 | Thioredoxin domain containing 9 OS=Gadus morhua OX=8049 GN=TXNDC9 PE=4 SV=1                                                                    | 12 | 2 | 2 | 2 | 223  | 25.7  | 6.71  | 6.45  | 2 | 1 |
| -7.3E+18 | IsMasterProtein | A0A8C5AWH4 | Transmembrane phosphatase with tensin homology OS=Gadus morhua OX=8049 GN=tpste PE=3 SV=1                                                      | 11 | 2 | 2 | 2 | 466  | 53.6  | 8.1   | 5.23  | 2 | 1 |
| -7.3E+18 | IsMasterProtein | A0A8C5B2D8 | Ribonuclease H OS=Gadus morhua OX=8049 PE=3 SV=1                                                                                               | 3  | 2 | 2 | 2 | 1225 | 136.5 | 9.38  | 4.89  | 2 | 1 |
| -7.2E+18 | IsMasterProtein | A0A8C4ZHW4 | SWI/SNF related, matrix associated, actin dependent regulator of chromatin, subfamily a, member 2 OS=Gadus morhua OX=8049 GN=SMARCA2 PE=3 SV=1 | 6  | 4 | 5 | 2 | 1549 | 175.7 | 8.78  | 13.74 | 4 | 1 |
| -7.2E+18 | IsMasterProtein | A0A8C5BJJ4 | Methionine synthase OS=Gadus morhua OX=8049 GN=mtr PE=3 SV=1                                                                                   | 5  | 2 | 2 | 2 | 1200 | 133   | 5.85  | 5.92  | 2 | 1 |
| -7.2E+18 | IsMasterProtein | A0A8C4Z5R4 | Delta-like protein OS=Gadus morhua OX=8049 GN=dll4 PE=4 SV=1                                                                                   | 5  | 2 | 2 | 2 | 691  | 75.6  | 6.21  | 4.56  | 2 | 1 |
| -7.2E+18 | IsMasterProtein | A0A8C5A727 | Inhibitor of nuclear factor kappa B kinase regulatory subunit gamma OS=Gadus morhua OX=8049 GN=ikbkg PE=4 SV=1                                 | 4  | 2 | 2 | 2 | 592  | 66.9  | 5.43  | 5.15  | 2 | 1 |
| -7.2E+18 | IsMasterProtein | A0A8C4Z786 | Uncharacterized protein OS=Gadus morhua OX=8049 PE=4 SV=1                                                                                      | 4  | 2 | 3 | 2 | 1667 | 183.6 | 7.09  | 8.55  | 2 | 1 |
| -7.2E+18 | IsMasterProtein | A0A8C4ZR31 | RAB28, member RAS oncogene family OS=Gadus morhua OX=8049 GN=RAB28 PE=4 SV=1                                                                   | 13 | 2 | 2 | 2 | 222  | 24.9  | 5.68  | 5.17  | 2 | 1 |
| -7.2E+18 | IsMasterProtein | A0A8C5BJF4 | Histone demethylase UTY-like OS=Gadus morhua OX=8049 GN=LOC115541949 PE=4 SV=1                                                                 | 2  | 2 | 2 | 2 | 1382 | 148.7 | 8.13  | 4.68  | 2 | 1 |
| -7.2E+18 | IsMasterProtein | A0A8C5C8S7 | Nuclear factor of activated T cells 1 OS=Gadus morhua OX=8049 GN=NFATC1 PE=4 SV=1                                                              | 5  | 2 | 2 | 2 | 960  | 101.7 | 7.02  | 5.58  | 2 | 1 |
| -7.2E+18 | IsMasterProtein | A0A8C5ARF2 | Carbonic anhydrase OS=Gadus morhua OX=8049 PE=3 SV=1                                                                                           | 16 | 2 | 2 | 2 | 307  | 34.2  | 7.28  | 6.05  | 2 | 1 |
| -7.2E+18 | IsMasterProtein | A0A8C5F7C3 | Importin N-terminal domain-containing protein OS=Gadus morhua OX=8049 PE=3 SV=1                                                                | 3  | 2 | 2 | 2 | 900  | 100.1 | 4.86  | 6.47  | 2 | 1 |
| -7.2E+18 | IsMasterProtein | A0A8C5FF67 | RAN binding protein 3b OS=Gadus morhua OX=8049 GN=ranbp3b PE=4 SV=1                                                                            | 9  | 2 | 2 | 2 | 510  | 54.8  | 5.07  | 6.14  | 2 | 1 |
| -7.2E+18 | IsMasterProtein | A0A8C4Z538 | Uncharacterized protein OS=Gadus morhua OX=8049 PE=3 SV=1                                                                                      | 9  | 2 | 3 | 2 | 194  | 21.4  | 8.41  | 6.93  | 2 | 1 |



|          |                 |            |                                                                                                                  |    |   |   |   |      |       |       |       |   |   |
|----------|-----------------|------------|------------------------------------------------------------------------------------------------------------------|----|---|---|---|------|-------|-------|-------|---|---|
| -7.1E+18 | IsMasterProtein | A0A8C5BDL8 | Kinesin motor domain-containing protein OS=Gadus morhua OX=8049 PE=3 SV=1                                        | 3  | 3 | 3 | 2 | 1408 | 157.8 | 5.73  | 7     | 3 | 1 |
| -7.1E+18 | IsMasterProtein | A0A8C5BVE1 | Non-specific serine/threonine protein kinase OS=Gadus morhua OX=8049 PE=3 SV=1                                   | 1  | 2 | 2 | 2 | 1674 | 189.2 | 6.46  | 4.27  | 2 | 1 |
| -7.1E+18 | IsMasterProtein | A0A8C5B2U7 | Protein-tyrosine-phosphatase OS=Gadus morhua OX=8049 GN=cdc14b PE=3 SV=1                                         | 7  | 2 | 2 | 2 | 436  | 49.8  | 8.48  | 4.57  | 2 | 1 |
| -7.1E+18 | IsMasterProtein | A0A8C5CWW4 | Dynein light chain OS=Gadus morhua OX=8049 GN=dynll2a PE=3 SV=1                                                  | 38 | 2 | 2 | 2 | 89   | 10.4  | 7.37  | 6.42  | 2 | 1 |
| -7.1E+18 | IsMasterProtein | A0A8C5ANB8 | Tetratricopeptide repeat, ankyrin repeat and coiled-coil containing 1 OS=Gadus morhua OX=8049 GN=TANC1 PE=4 SV=1 | 2  | 2 | 2 | 2 | 1805 | 195.3 | 8.41  | 5.38  | 2 | 1 |
| -7.1E+18 | IsMasterProtein | A0A8C5BFJ3 | Small nuclear ribonucleoprotein-associated protein OS=Gadus morhua OX=8049 GN=snrpb PE=3 SV=1                    | 3  | 2 | 2 | 2 | 266  | 27.7  | 11.62 | 4.22  | 2 | 1 |
| -7.1E+18 | IsMasterProtein | A0A8C5ARP6 | Influenza virus NS1A binding protein a OS=Gadus morhua OX=8049 PE=4 SV=1                                         | 11 | 2 | 3 | 2 | 660  | 73    | 6.13  | 6.25  | 2 | 1 |
| -7.1E+18 | IsMasterProtein | A0A8C4ZSZ4 | Uncharacterized protein OS=Gadus morhua OX=8049 PE=4 SV=1                                                        | 47 | 2 | 3 | 2 | 74   | 8.8   | 4.65  | 8.82  | 2 | 1 |
| -7.1E+18 | IsMasterProtein | A0A8C5ASM1 | Uncharacterized LOC115540514 OS=Gadus morhua OX=8049 GN=LOC115540514 PE=4 SV=1                                   | 3  | 2 | 2 | 2 | 1079 | 118.8 | 6.34  | 5.17  | 2 | 1 |
| -7.1E+18 | IsMasterProtein | A0A8C5FIR1 | Uncharacterized protein OS=Gadus morhua OX=8049 PE=3 SV=1                                                        | 2  | 3 | 3 | 2 | 2062 | 234.1 | 5.88  | 7.32  | 3 | 1 |
| -7.1E+18 | IsMasterProtein | A0A8C5FX49 | Uncharacterized LOC115561767 OS=Gadus morhua OX=8049 GN=LOC115561767 PE=4 SV=1                                   | 8  | 2 | 4 | 2 | 618  | 70.2  | 7.31  | 10.77 | 2 | 1 |
| -7.1E+18 | IsMasterProtein | A0A8C5B5T7 | Nidogen 1a OS=Gadus morhua OX=8049 PE=4 SV=1                                                                     | 12 | 7 | 7 | 2 | 1182 | 129.2 | 5.49  | 23.69 | 7 | 1 |
| -7.1E+18 | IsMasterProtein | A0A8C4Z883 | AMP-binding domain-containing protein OS=Gadus morhua OX=8049 PE=3 SV=1                                          | 3  | 2 | 2 | 2 | 627  | 70.2  | 8.24  | 6.02  | 2 | 1 |
| -7.1E+18 | IsMasterProtein | A0A8C5CL73 | Catenin (cadherin-associated protein), beta 1 OS=Gadus morhua OX=8049 GN=ctnnb1 PE=3 SV=1                        | 8  | 5 | 5 | 2 | 732  | 79.8  | 7.99  | 12.35 | 5 | 1 |
| -7.1E+18 | IsMasterProtein | A0A8C5BQ09 | Histone-lysine N-methyltransferase OS=Gadus morhua OX=8049 PE=3 SV=1                                             | 1  | 2 | 2 | 2 | 4488 | 480.6 | 9.32  | 4.88  | 2 | 1 |
| -7.1E+18 | IsMasterProtein | A0A8C5AXJ7 | Glutaryl-CoA dehydrogenase OS=Gadus morhua OX=8049 GN=gcdh PE=3 SV=1                                             | 4  | 2 | 2 | 2 | 427  | 47    | 7.62  | 4.52  | 2 | 1 |
| -7E+18   | IsMasterProtein | A0A8C4Z4B3 | NADH dehydrogenase [ubiquinone] 1 alpha subcomplex subunit 5 OS=Gadus morhua OX=8049 GN=ndufa5 PE=3 SV=1         | 28 | 2 | 2 | 2 | 116  | 13.4  | 6.74  | 4.82  | 2 | 1 |
| -7E+18   | IsMasterProtein | A0A8C4ZNN0 | Ribosomal L23eN domain-containing protein OS=Gadus morhua OX=8049 PE=3 SV=1                                      | 16 | 2 | 3 | 2 | 158  | 17.9  | 10.45 | 8.2   | 2 | 1 |
| -7E+18   | IsMasterProtein | A0A8C5FQP5 | Phospholipase OS=Gadus morhua OX=8049 GN=pld1b PE=3 SV=1                                                         | 4  | 2 | 2 | 2 | 983  | 112.4 | 9.16  | 4.85  | 2 | 1 |
| -7E+18   | IsMasterProtein | A0A8C5BWX7 | Ribonuclease H OS=Gadus morhua OX=8049 PE=3 SV=1                                                                 | 2  | 2 | 2 | 2 | 1988 | 225.1 | 8.28  | 4.95  | 2 | 1 |
| -7E+18   | IsMasterProtein | A0A8C5AHW7 | Poly [ADP-ribose] polymerase OS=Gadus morhua OX=8049 PE=3 SV=1                                                   | 5  | 2 | 3 | 2 | 690  | 76.8  | 6.71  | 7.24  | 2 | 1 |
| -7E+18   | IsMasterProtein | A0A8C5CUC3 | IK cytokine OS=Gadus morhua OX=8049 GN=ik PE=3 SV=1                                                              | 5  | 2 | 2 | 2 | 571  | 65.9  | 8.16  | 5.59  | 2 | 1 |
| -7E+18   | IsMasterProtein | A0A8C5FSE6 | ATP synthase subunit e, mitochondrial OS=Gadus morhua OX=8049 GN=atp5me PE=3 SV=1                                | 30 | 2 | 2 | 2 | 87   | 9.9   | 5.48  | 5.26  | 2 | 1 |
| -7E+18   | IsMasterProtein | A0A8C4ZRI5 | Staphylococcal nuclease domain-containing protein OS=Gadus morhua OX=8049 PE=4 SV=1                              | 3  | 2 | 2 | 2 | 855  | 95.3  | 8.44  | 5.01  | 2 | 1 |
| -7E+18   | IsMasterProtein | A0A8C5FH88 | Phosphatase and actin regulator 4 OS=Gadus morhua OX=8049 GN=phactr4b PE=3 SV=1                                  | 6  | 2 | 2 | 2 | 900  | 98.6  | 6.39  | 6.14  | 2 | 1 |
| -7E+18   | IsMasterProtein | A0A8C4Z4E5 | FAM193_C domain-containing protein OS=Gadus morhua OX=8049 PE=3 SV=1                                             | 5  | 2 | 2 | 2 | 989  | 105.2 | 8.18  | 6.23  | 2 | 1 |
| -7E+18   | IsMasterProtein | A0A8C5AQV2 | Glycerol-3-phosphate dehydrogenase, mitochondrial OS=Gadus morhua OX=8049 GN=gpd2 PE=3 SV=1                      | 5  | 2 | 2 | 2 | 705  | 78.4  | 6.34  | 5.81  | 2 | 1 |
| -7E+18   | IsMasterProtein | A0A8C5FVF6 | UDP-N-acetylglucosamine 4-epimerase OS=Gadus morhua OX=8049 GN=gale PE=4 SV=1                                    | 5  | 2 | 2 | 2 | 537  | 57.6  | 7.44  | 5.45  | 2 | 1 |
| -7E+18   | IsMasterProtein | A0A8C5BCY1 | ADAM metalloproteinase with thrombospondin type 1 motif, 17 OS=Gadus morhua OX=8049 PE=4 SV=1                    | 4  | 2 | 2 | 2 | 993  | 110.8 | 7.9   | 5.12  | 2 | 1 |
| -7E+18   | IsMasterProtein | A0A8C5CAF6 | Metabolism of cobalamin associated D OS=Gadus morhua OX=8049 PE=4 SV=1                                           | 15 | 2 | 2 | 2 | 334  | 37    | 6.37  | 6.07  | 2 | 1 |
| -7E+18   | IsMasterProtein | A0A8C5AWW3 | Ras homolog family member T2 OS=Gadus morhua OX=8049 GN=rhot2 PE=3 SV=1                                          | 5  | 2 | 2 | 2 | 859  | 93.7  | 9     | 5.28  | 2 | 1 |
| -7E+18   | IsMasterProtein | A0A8C5FIK9 | Timeless circadian clock OS=Gadus morhua OX=8049 GN=timeless PE=3 SV=1                                           | 4  | 2 | 2 | 2 | 1067 | 122   | 5.76  | 5.12  | 2 | 1 |

|          |                 |            |                                                                                                                             |    |   |   |   |      |       |      |       |   |   |
|----------|-----------------|------------|-----------------------------------------------------------------------------------------------------------------------------|----|---|---|---|------|-------|------|-------|---|---|
| -7E+18   | IsMasterProtein | A0A8C5B421 | Spectrin, beta, non-erythrocytic 4b OS=Gadus morhua OX=8049 PE=4 SV=1                                                       | 4  | 2 | 2 | 2 | 1242 | 142.4 | 5.97 | 6.14  | 2 | 1 |
| -7E+18   | IsMasterProtein | A0A8C4ZBT8 | Furry homolog a (Drosophila) OS=Gadus morhua OX=8049 PE=4 SV=1                                                              | 2  | 2 | 2 | 2 | 2937 | 326.8 | 6.37 | 5.58  | 2 | 1 |
| -7E+18   | IsMasterProtein | A0A8C5C4L2 | Bromo adjacent homology domain containing 1 OS=Gadus morhua OX=8049 GN=bahd1 PE=4 SV=1                                      | 4  | 2 | 2 | 2 | 865  | 94.5  | 9.58 | 5.07  | 2 | 1 |
| -7E+18   | IsMasterProtein | A0A8C5B0K7 | Uncharacterized protein OS=Gadus morhua OX=8049 PE=4 SV=1                                                                   | 5  | 2 | 2 | 2 | 596  | 67.5  | 5.73 | 4.67  | 2 | 1 |
| -7E+18   | IsMasterProtein | A0A8C5C6E3 | Cytochrome c OS=Gadus morhua OX=8049 GN=LOC115560196 PE=3 SV=1                                                              | 18 | 2 | 2 | 2 | 104  | 11.4  | 9.41 | 5.14  | 2 | 1 |
| -6.9E+18 | IsMasterProtein | A0A8C5D861 | PiggyBac transposable element-derived protein 4-like OS=Gadus morhua OX=8049 GN=LOC115561786 PE=4 SV=1                      | 5  | 2 | 2 | 2 | 642  | 72.9  | 8.73 | 4.75  | 2 | 1 |
| -6.9E+18 | IsMasterProtein | A0A8C5FMK8 | Phosphatidylinositol-4-phosphate 3-kinase, catalytic subunit type 2 beta OS=Gadus morhua OX=8049 GN=pik3c2b PE=3 SV=1       | 2  | 2 | 2 | 2 | 1484 | 165.8 | 7.69 | 5.03  | 2 | 1 |
| -6.9E+18 | IsMasterProtein | A0A8C4Z8T5 | Eukaryotic translation initiation factor 5A OS=Gadus morhua OX=8049 GN=EIF5A PE=3 SV=1                                      | 16 | 3 | 5 | 2 | 166  | 18.3  | 7.37 | 14.12 | 3 | 1 |
| -6.9E+18 | IsMasterProtein | A0A8C5FUW2 | Multivesicular body subunit 12Ba OS=Gadus morhua OX=8049 GN=mvb12ba PE=3 SV=1                                               | 11 | 2 | 2 | 2 | 315  | 35    | 8.27 | 7.58  | 2 | 1 |
| -6.9E+18 | IsMasterProtein | A0A8C4ZQK2 | Uncharacterized protein OS=Gadus morhua OX=8049 PE=4 SV=1                                                                   | 7  | 2 | 2 | 2 | 667  | 74.2  | 8.41 | 4.92  | 2 | 1 |
| -6.9E+18 | IsMasterProtein | A0A8C5FG50 | Hormone-sensitive lipase OS=Gadus morhua OX=8049 PE=3 SV=1                                                                  | 5  | 2 | 2 | 2 | 849  | 91.9  | 7.11 | 5.37  | 2 | 1 |
| -6.9E+18 | IsMasterProtein | A0A8C5ACH2 | Myosin IEb OS=Gadus morhua OX=8049 GN=myo1eb PE=3 SV=1                                                                      | 5  | 2 | 3 | 2 | 1011 | 115.2 | 8.79 | 6.52  | 2 | 1 |
| -6.9E+18 | IsMasterProtein | A0A8C5F8V4 | CTD (carboxy-terminal domain, RNA polymerase II, polypeptide A) small phosphatase like 2b OS=Gadus morhua OX=8049 PE=4 SV=1 | 8  | 2 | 2 | 2 | 483  | 54.4  | 8.27 | 5.77  | 2 | 1 |
| -6.9E+18 | IsMasterProtein | A0A8C5CZ81 | DZF domain-containing protein OS=Gadus morhua OX=8049 PE=4 SV=1                                                             | 7  | 2 | 2 | 2 | 967  | 105.4 | 8.82 | 6.1   | 2 | 1 |
| -6.9E+18 | IsMasterProtein | A0A8C5FCZ0 | 26S proteasome regulatory subunit 6B OS=Gadus morhua OX=8049 PE=3 SV=1                                                      | 5  | 2 | 2 | 2 | 480  | 54.7  | 5.49 | 5.03  | 2 | 1 |
| -6.9E+18 | IsMasterProtein | A0A8C4YWL5 | Importin 7 OS=Gadus morhua OX=8049 PE=4 SV=1                                                                                | 3  | 2 | 2 | 2 | 1050 | 120.1 | 4.79 | 6.07  | 2 | 1 |
| -6.9E+18 | IsMasterProtein | A0A8C5AIT3 | Exportin 5 OS=Gadus morhua OX=8049 GN=xpo5 PE=3 SV=1                                                                        | 4  | 2 | 2 | 2 | 1184 | 133.6 | 6.1  | 5.12  | 2 | 1 |
| -6.9E+18 | IsMasterProtein | A0A8C5C952 | NLR family member X1 OS=Gadus morhua OX=8049 GN=pdzd3a PE=4 SV=1                                                            | 4  | 2 | 2 | 2 | 961  | 108.6 | 8.03 | 5.02  | 2 | 1 |
| -6.9E+18 | IsMasterProtein | A0A8C5FLI2 | ATP-binding cassette, sub-family A (ABC1), member 3b OS=Gadus morhua OX=8049 GN=abca3b PE=4 SV=1                            | 2  | 2 | 2 | 2 | 1709 | 190.6 | 7.03 | 5.23  | 2 | 1 |
| -6.9E+18 | IsMasterProtein | A0A8C5AD44 | Uncharacterized protein OS=Gadus morhua OX=8049 PE=4 SV=1                                                                   | 2  | 2 | 2 | 2 | 2347 | 262.3 | 6.58 | 6.95  | 2 | 1 |
| -6.8E+18 | IsMasterProtein | A0A8C5A4B8 | Adhesion G protein-coupled receptor L1-like OS=Gadus morhua OX=8049 GN=LOC115539898 PE=4 SV=1                               | 2  | 2 | 2 | 2 | 1964 | 213.4 | 7.01 | 4.5   | 2 | 1 |
| -6.8E+18 | IsMasterProtein | A0A8C5FUZ5 | Mediator of RNA polymerase II transcription subunit 1 OS=Gadus morhua OX=8049 GN=MED1 PE=3 SV=1                             | 3  | 2 | 2 | 2 | 1877 | 191.6 | 8.68 | 6.12  | 2 | 1 |
| -6.8E+18 | IsMasterProtein | A0A8C5C2E5 | Ribonuclease H OS=Gadus morhua OX=8049 GN=LOC115552730 PE=3 SV=1                                                            | 4  | 2 | 2 | 2 | 1321 | 147.8 | 8.59 | 5.58  | 2 | 1 |
| -6.8E+18 | IsMasterProtein | A0A8C5ATQ8 | Activating transcription factor 7 interacting protein OS=Gadus morhua OX=8049 GN=atf7ip PE=3 SV=1                           | 4  | 2 | 2 | 2 | 919  | 96.6  | 9.57 | 4.76  | 2 | 1 |
| -6.8E+18 | IsMasterProtein | A0A8C5BQB2 | RNA polymerase II associated protein 1 OS=Gadus morhua OX=8049 PE=3 SV=1                                                    | 2  | 2 | 2 | 2 | 1257 | 136.5 | 7.02 | 4.8   | 2 | 1 |
| -6.8E+18 | IsMasterProtein | A0A8C5ARJ3 | Glutamate receptor, metabotropic 8a OS=Gadus morhua OX=8049 PE=3 SV=1                                                       | 3  | 2 | 2 | 2 | 913  | 101.4 | 8.41 | 5.29  | 2 | 1 |
| -6.8E+18 | IsMasterProtein | A0A8C4ZMB1 | Rho GTPase-activating protein 6-like OS=Gadus morhua OX=8049 GN=ARHGAP6 PE=4 SV=1                                           | 4  | 2 | 2 | 2 | 931  | 100.3 | 8.79 | 4.63  | 2 | 1 |
| -6.8E+18 | IsMasterProtein | A0A8C5C5A3 | Phospholipase D4-like OS=Gadus morhua OX=8049 GN=LOC115543820 PE=3 SV=1                                                     | 10 | 2 | 2 | 2 | 486  | 54    | 6.1  | 7.91  | 2 | 1 |
| -6.8E+18 | IsMasterProtein | A0A8C4YZY5 | TRAF2 and NCK interacting kinase a OS=Gadus morhua OX=8049 PE=4 SV=1                                                        | 4  | 2 | 2 | 2 | 1135 | 130.1 | 7.96 | 6.01  | 2 | 1 |
| -6.8E+18 | IsMasterProtein | A0A8C4Z713 | Uncharacterized LOC115550897 OS=Gadus morhua OX=8049 GN=si:ch211-180f4.1 PE=4 SV=1                                          | 7  | 2 | 2 | 2 | 744  | 80.7  | 5.63 | 6.19  | 2 | 1 |
| -6.8E+18 | IsMasterProtein | A0A8C5B2B4 | Nuclear casein kinase and cyclin-dependent kinase substrate 1a OS=Gadus morhua OX=8049 GN=nucks1a PE=4 SV=1                 | 8  | 2 | 2 | 2 | 368  | 40.8  | 4.86 | 6.03  | 2 | 1 |
| -6.8E+18 | IsMasterProtein | A0A8C5BQW8 | EMAP like 1 OS=Gadus morhua OX=8049 GN=eml1 PE=3 SV=1                                                                       | 4  | 2 | 3 | 2 | 814  | 89.3  | 6.71 | 6.31  | 2 | 1 |
| -6.8E+18 | IsMasterProtein | A0A8C5A1E6 | LIM domain 7a OS=Gadus morhua OX=8049 PE=4 SV=1                                                                             | 3  | 2 | 2 | 2 | 1223 | 136.6 | 7.85 | 5.19  | 2 | 1 |
| -6.8E+18 | IsMasterProtein | A0A8C4ZMP1 | Fibulin 7 OS=Gadus morhua OX=8049 GN=fbln7 PE=4 SV=1                                                                        | 5  | 2 | 2 | 2 | 444  | 48.3  | 7.87 | 5.35  | 2 | 1 |
| -6.8E+18 | IsMasterProtein | A0A8C5BVJ0 | SV2 related protein a OS=Gadus morhua OX=8049 GN=svopa PE=4 SV=1                                                            | 4  | 2 | 2 | 2 | 514  | 56.6  | 6.05 | 4.85  | 2 | 1 |

|          |                 |            |                                                                                                                         |    |    |    |   |      |       |      |       |    |   |
|----------|-----------------|------------|-------------------------------------------------------------------------------------------------------------------------|----|----|----|---|------|-------|------|-------|----|---|
| -6.7E+18 | IsMasterProtein | A0A8C4ZDC3 | Cytochrome b-c1 complex subunit 7 OS=Gadus morhua OX=8049 GN=LOC115535545 PE=3 SV=1                                     | 39 | 2  | 2  | 2 | 111  | 13.4  | 8.92 | 7.67  | 2  | 1 |
| -6.7E+18 | IsMasterProtein | A0A8C4ZM12 | Ubiquitin carboxyl-terminal hydrolase MINDY OS=Gadus morhua OX=8049 GN=mindy4 PE=3 SV=1                                 | 9  | 2  | 2  | 2 | 704  | 77.4  | 7.28 | 5.51  | 2  | 1 |
| -6.7E+18 | IsMasterProtein | A0A8C5A2D2 | Rho guanine nucleotide exchange factor 9 OS=Gadus morhua OX=8049 GN=arhgef9a PE=4 SV=1                                  | 3  | 2  | 2  | 2 | 1275 | 142.6 | 8.21 | 5.42  | 2  | 1 |
| -6.7E+18 | IsMasterProtein | A0A8C4Z2V8 | GTP:AMP phosphotransferase AK3, mitochondrial OS=Gadus morhua OX=8049 GN=AK3 PE=3 SV=1                                  | 16 | 2  | 2  | 2 | 242  | 27    | 9.07 | 7.37  | 2  | 1 |
| -6.7E+18 | IsMasterProtein | A0A8C5A6M6 | Complement component 7b OS=Gadus morhua OX=8049 GN=c7b PE=3 SV=1                                                        | 6  | 2  | 2  | 2 | 823  | 90.1  | 7.08 | 6.21  | 2  | 1 |
| -6.7E+18 | IsMasterProtein | A0A8C4ZSI1 | IF rod domain-containing protein OS=Gadus morhua OX=8049 PE=3 SV=1                                                      | 8  | 3  | 3  | 2 | 480  | 52.7  | 5.25 | 9.48  | 3  | 1 |
| -6.7E+18 | IsMasterProtein | A0A8C5F518 | Nucleoside-diphosphate kinase OS=Gadus morhua OX=8049 GN=AK9 PE=4 SV=1                                                  | 1  | 2  | 2  | 2 | 1481 | 167.9 | 6.33 | 4.07  | 2  | 1 |
| -6.7E+18 | IsMasterProtein | A0A8C5CAV3 | H15 domain-containing protein OS=Gadus morhua OX=8049 PE=3 SV=1                                                         | 17 | 4  | 4  | 2 | 187  | 19.7  | 10.8 | 9     | 4  | 1 |
| -6.7E+18 | IsMasterProtein | A0A8C5C205 | Vezatin OS=Gadus morhua OX=8049 GN=VEZT PE=3 SV=1                                                                       | 9  | 2  | 2  | 2 | 782  | 85.4  | 5    | 5.81  | 2  | 1 |
| -6.7E+18 | IsMasterProtein | A0A8C4Z8D7 | Innate immunity activator a OS=Gadus morhua OX=8049 PE=4 SV=1                                                           | 7  | 2  | 2  | 2 | 408  | 45.2  | 9.38 | 4.74  | 2  | 1 |
| -6.7E+18 | IsMasterProtein | A0A8C5CLM3 | Uncharacterized protein OS=Gadus morhua OX=8049 PE=4 SV=1                                                               | 6  | 4  | 5  | 2 | 1499 | 160.3 | 8.81 | 14.35 | 4  | 1 |
| -6.7E+18 | IsMasterProtein | A0A8C5AIF9 | Zinc finger and BTB domain containing 4 OS=Gadus morhua OX=8049 PE=4 SV=1                                               | 4  | 2  | 2  | 2 | 1190 | 128.1 | 9.47 | 5.46  | 2  | 1 |
| -6.7E+18 | IsMasterProtein | A0A8C5BUG6 | Rho guanine nucleotide exchange factor (GEF) 4 OS=Gadus morhua OX=8049 GN=arhgef4 PE=4 SV=1                             | 5  | 2  | 2  | 2 | 600  | 69.7  | 7.33 | 5     | 2  | 1 |
| -6.7E+18 | IsMasterProtein | A0A8C5AEC8 | Par-3 family cell polarity regulator OS=Gadus morhua OX=8049 GN=PAR3 PE=3 SV=1                                          | 3  | 2  | 2  | 2 | 1243 | 136.4 | 7.3  | 5.5   | 2  | 1 |
| -6.7E+18 | IsMasterProtein | A0A8C5F534 | Nucleolar protein with MIF4G domain 1 OS=Gadus morhua OX=8049 GN=nom1 PE=4 SV=1                                         | 2  | 2  | 2  | 2 | 842  | 95.5  | 5.52 | 5.44  | 2  | 1 |
| -6.7E+18 | IsMasterProtein | A0A8C5F3W2 | Ring-box 1, E3 ubiquitin protein ligase OS=Gadus morhua OX=8049 GN=rbx1 PE=3 SV=1                                       | 37 | 2  | 2  | 2 | 108  | 12.3  | 6.96 | 4.97  | 2  | 1 |
| -6.7E+18 | IsMasterProtein | A0A8C5BCS9 | Uncharacterized protein OS=Gadus morhua OX=8049 PE=3 SV=1                                                               | 10 | 11 | 12 | 2 | 1576 | 174.2 | 8.16 | 32.62 | 11 | 1 |
| -6.7E+18 | IsMasterProtein | A0A8C5ADP0 | Fumarate hydratase, mitochondrial OS=Gadus morhua OX=8049 PE=3 SV=1                                                     | 3  | 2  | 4  | 2 | 559  | 60.1  | 7.64 | 11.78 | 2  | 1 |
| -6.7E+18 | IsMasterProtein | A0A8C4ZUY9 | Calsequestrin OS=Gadus morhua OX=8049 PE=3 SV=1                                                                         | 7  | 2  | 3  | 2 | 557  | 63.2  | 4.22 | 7.76  | 2  | 1 |
| -6.7E+18 | IsMasterProtein | A0A8C5BGD2 | Solute carrier family 12 member 5 OS=Gadus morhua OX=8049 GN=slc12a5 PE=3 SV=1                                          | 4  | 2  | 4  | 2 | 1153 | 126.4 | 5.92 | 9.63  | 2  | 1 |
| -6.7E+18 | IsMasterProtein | A0A8C5FED9 | Thioredoxin OS=Gadus morhua OX=8049 PE=3 SV=1                                                                           | 24 | 2  | 3  | 2 | 108  | 11.9  | 4.96 | 10.37 | 2  | 1 |
| -6.6E+18 | IsMasterProtein | A0A8C5CKK1 | Interferon-induced, double-stranded RNA-activated protein kinase-like OS=Gadus morhua OX=8049 GN=LOC115560251 PE=4 SV=1 | 6  | 2  | 2  | 2 | 655  | 73.4  | 7.49 | 5.38  | 2  | 1 |
| -6.6E+18 | IsMasterProtein | A0A8C5BB12 | Uncharacterized protein OS=Gadus morhua OX=8049 PE=4 SV=1                                                               | 3  | 2  | 3  | 2 | 1116 | 124.3 | 7.5  | 5.2   | 2  | 1 |
| -6.6E+18 | IsMasterProtein | A0A8C5BRL4 | AIG1-type G domain-containing protein OS=Gadus morhua OX=8049 PE=3 SV=1                                                 | 9  | 2  | 2  | 2 | 343  | 38.6  | 7.9  | 5.1   | 2  | 1 |
| -6.6E+18 | IsMasterProtein | A0A8C4Z3K7 | UEV and lactate/malate dehydrogenase domains OS=Gadus morhua OX=8049 GN=uevld PE=4 SV=1                                 | 10 | 2  | 2  | 2 | 471  | 51.3  | 7.69 | 5.58  | 2  | 1 |
| -6.6E+18 | IsMasterProtein | A0A8C5F871 | Enoyl-CoA delta isomerase 2 OS=Gadus morhua OX=8049 GN=eci2 PE=4 SV=1                                                   | 7  | 2  | 2  | 2 | 395  | 42.7  | 8.35 | 4.69  | 2  | 1 |
| -6.6E+18 | IsMasterProtein | A0A8C5CS66 | Fizzy/cell division cycle 20 related 1a OS=Gadus morhua OX=8049 GN=fzr1a PE=3 SV=1                                      | 7  | 2  | 2  | 2 | 547  | 60.8  | 8.88 | 5.33  | 2  | 1 |
| -6.6E+18 | IsMasterProtein | A0A8C5F4K0 | Inositol 1,4,5-trisphosphate receptor OS=Gadus morhua OX=8049 GN=itpr2 PE=3 SV=1                                        | 2  | 2  | 2  | 2 | 2662 | 303.2 | 6.48 | 5.85  | 2  | 1 |
| -6.6E+18 | IsMasterProtein | A0A8C5F581 | DOMON domain-containing protein OS=Gadus morhua OX=8049 PE=3 SV=1                                                       | 7  | 2  | 2  | 2 | 471  | 52.9  | 6.11 | 5.67  | 2  | 1 |
| -6.6E+18 | IsMasterProtein | A0A8C5AA21 | XPGN domain-containing protein OS=Gadus morhua OX=8049 PE=3 SV=1                                                        | 6  | 2  | 3  | 2 | 518  | 57.8  | 8.03 | 6.82  | 2  | 1 |
| -6.6E+18 | IsMasterProtein | A0A8C5BC68 | Plexin-B2-like OS=Gadus morhua OX=8049 GN=LOC115542582 PE=3 SV=1                                                        | 2  | 2  | 2  | 2 | 1895 | 211.6 | 7.3  | 5.59  | 2  | 1 |
| -6.6E+18 | IsMasterProtein | A0A8C5A154 | Solute carrier family 12 member 9 OS=Gadus morhua OX=8049 GN=slc12a9 PE=3 SV=1                                          | 7  | 2  | 2  | 2 | 882  | 96.8  | 6.96 | 5.61  | 2  | 1 |
| -6.6E+18 | IsMasterProtein | A0A8C5FEF4 | Transient receptor potential cation channel subfamily C member 6 OS=Gadus morhua OX=8049 PE=4 SV=1                      | 6  | 2  | 2  | 2 | 831  | 93.3  | 6.44 | 6.57  | 2  | 1 |

|          |                 |            |                                                                                                             |    |   |   |   |      |       |      |      |   |   |
|----------|-----------------|------------|-------------------------------------------------------------------------------------------------------------|----|---|---|---|------|-------|------|------|---|---|
| -6.5E+18 | IsMasterProtein | A0A8C5FUE6 | Inhibin alpha chain OS=Gadus morhua OX=8049 PE=3 SV=1                                                       | 14 | 2 | 2 | 2 | 338  | 37.7  | 7.02 | 6.98 | 2 | 1 |
| -6.5E+18 | IsMasterProtein | A0A8C5C5X8 | CBFA2/RUNX1 partner transcriptional co-repressor 2 OS=Gadus morhua OX=8049 PE=4 SV=1                        | 4  | 2 | 2 | 2 | 598  | 65.8  | 8.02 | 4.7  | 2 | 1 |
| -6.5E+18 | IsMasterProtein | A0A8C5AJR3 | Receptor protein-tyrosine kinase OS=Gadus morhua OX=8049 PE=4 SV=1                                          | 5  | 2 | 2 | 2 | 898  | 99.3  | 7.97 | 5.32 | 2 | 1 |
| -6.5E+18 | IsMasterProtein | A0A8C5A345 | Uncharacterized protein OS=Gadus morhua OX=8049 PE=3 SV=1                                                   | 2  | 2 | 3 | 2 | 757  | 85    | 8.48 | 6.29 | 2 | 1 |
| -6.5E+18 | IsMasterProtein | A0A8C5A718 | Uncharacterized protein OS=Gadus morhua OX=8049 PE=4 SV=1                                                   | 1  | 2 | 3 | 2 | 3462 | 376.1 | 5.49 | 8.59 | 2 | 1 |
| -6.5E+18 | IsMasterProtein | A0A8C4ZPH6 | Dedicator of cytokinesis 7 OS=Gadus morhua OX=8049 GN=dock7 PE=3 SV=1                                       | 2  | 2 | 2 | 2 | 2133 | 241.2 | 6.67 | 5.04 | 2 | 1 |
| -6.5E+18 | IsMasterProtein | A0A8C5FLQ4 | HEAT repeat containing 5B OS=Gadus morhua OX=8049 GN=HEATR5B PE=3 SV=1                                      | 5  | 5 | 7 | 2 | 2004 | 216.6 | 7.3  | 21.6 | 5 | 1 |
| -6.5E+18 | IsMasterProtein | A0A8C5B098 | Procollagen-proline 4-dioxygenase OS=Gadus morhua OX=8049 PE=3 SV=1                                         | 11 | 2 | 2 | 2 | 523  | 59.8  | 5.4  | 5.62 | 2 | 1 |
| -6.5E+18 | IsMasterProtein | A0A8C5A0K3 | RAB14, member RAS oncogene family, like OS=Gadus morhua OX=8049 GN=rab14l PE=4 SV=1                         | 19 | 3 | 3 | 2 | 201  | 22.2  | 7.94 | 7.79 | 3 | 1 |
| -6.5E+18 | IsMasterProtein | A0A8C5BF07 | Sorting nexin OS=Gadus morhua OX=8049 GN=snx5 PE=3 SV=1                                                     | 10 | 2 | 2 | 2 | 413  | 47.8  | 8.07 | 5.91 | 2 | 1 |
| -6.5E+18 | IsMasterProtein | A0A8C5AV68 | Uncharacterized protein OS=Gadus morhua OX=8049 PE=4 SV=1                                                   | 3  | 2 | 3 | 2 | 1353 | 147.1 | 9.42 | 5.02 | 2 | 1 |
| -6.5E+18 | IsMasterProtein | A0A8C4ZK77 | Phosphatidylinositol glycan anchor biosynthesis, class S OS=Gadus morhua OX=8049 GN=pigs PE=3 SV=1          | 8  | 2 | 2 | 2 | 572  | 63.3  | 6.7  | 5.77 | 2 | 1 |
| -6.4E+18 | IsMasterProtein | A0A8C5FFB3 | RNA helicase OS=Gadus morhua OX=8049 PE=3 SV=1                                                              | 5  | 2 | 3 | 2 | 616  | 69.2  | 6.01 | 7.31 | 2 | 1 |
| -6.4E+18 | IsMasterProtein | A0A8C5AYE6 | Neurofascin homolog (chicken) a OS=Gadus morhua OX=8049 PE=3 SV=1                                           | 4  | 2 | 2 | 2 | 1182 | 131.3 | 6.49 | 5.68 | 2 | 1 |
| -6.4E+18 | IsMasterProtein | A0A8C4Z697 | Aldehyde dehydrogenase, mitochondrial-like OS=Gadus morhua OX=8049 GN=LOC115554282 PE=3 SV=1                | 7  | 2 | 2 | 2 | 493  | 54.2  | 5.77 | 5.64 | 2 | 1 |
| -6.4E+18 | IsMasterProtein | A0A8C5BRD3 | Potassium voltage-gated channel subfamily B member 2-like OS=Gadus morhua OX=8049 GN=LOC115549389 PE=4 SV=1 | 3  | 2 | 2 | 2 | 841  | 92.1  | 7.39 | 4.88 | 2 | 1 |
| -6.4E+18 | IsMasterProtein | A0A8C5BLQ8 | DENN domain-containing protein 5B-like OS=Gadus morhua OX=8049 GN=LOC115550626 PE=3 SV=1                    | 3  | 2 | 2 | 2 | 1241 | 137   | 6.79 | 5.03 | 2 | 1 |
| -6.4E+18 | IsMasterProtein | A0A8C4ZCI6 | DnaJ heat shock protein family (Hsp40) member A2a OS=Gadus morhua OX=8049 PE=3 SV=1                         | 5  | 2 | 2 | 2 | 430  | 47.3  | 7.01 | 6.04 | 2 | 1 |
| -6.4E+18 | IsMasterProtein | A0A8C5B9W9 | Plexin b1b OS=Gadus morhua OX=8049 PE=3 SV=1                                                                | 2  | 2 | 2 | 2 | 2186 | 239.9 | 6.57 | 6.59 | 2 | 1 |
| -6.4E+18 | IsMasterProtein | A0A8C4ZFR2 | tRNA N6-adenosine threonylcarbamoyltransferase, mitochondrial OS=Gadus morhua OX=8049 GN=osgepl1 PE=3 SV=1  | 11 | 2 | 2 | 2 | 412  | 44.9  | 8.28 | 5.46 | 2 | 1 |
| -6.4E+18 | IsMasterProtein | A0A8C5FWL6 | Vacuolar protein sorting 13 homolog B OS=Gadus morhua OX=8049 GN=VPS13B PE=3 SV=1                           | 1  | 2 | 2 | 2 | 3885 | 426.8 | 6.3  | 5.04 | 2 | 1 |
| -6.4E+18 | IsMasterProtein | A0A8C5FN38 | Erythrocyte membrane protein band 4.1-like 3b OS=Gadus morhua OX=8049 PE=4 SV=1                             | 6  | 2 | 3 | 2 | 1140 | 124.8 | 4.93 | 8.12 | 2 | 1 |
| -6.4E+18 | IsMasterProtein | A0A8C5F570 | Uncharacterized LOC115558435 OS=Gadus morhua OX=8049 GN=LOC115558435 PE=3 SV=1                              | 2  | 2 | 2 | 2 | 1288 | 144.1 | 7.01 | 4.42 | 2 | 1 |
| -6.3E+18 | IsMasterProtein | A0A8C5AH11 | MMS19 nucleotide excision repair protein OS=Gadus morhua OX=8049 GN=mms19 PE=3 SV=1                         | 5  | 2 | 9 | 2 | 929  | 101.1 | 5.87 | 29.5 | 2 | 1 |
| -6.3E+18 | IsMasterProtein | A0A8C5B0B8 | Cyclin-dependent kinase 5 OS=Gadus morhua OX=8049 GN=cdk5 PE=4 SV=1                                         | 4  | 3 | 4 | 2 | 877  | 96.6  | 8.56 | 8.76 | 3 | 1 |
| -6.3E+18 | IsMasterProtein | A0A8C5BAM2 | Zinc finger protein 281-like OS=Gadus morhua OX=8049 GN=LOC115531151 PE=4 SV=1                              | 5  | 2 | 2 | 2 | 843  | 90.8  | 8.28 | 4.71 | 2 | 1 |
| -6.3E+18 | IsMasterProtein | A0A8C5B0W9 | Gelsolin OS=Gadus morhua OX=8049 GN=scinlb PE=4 SV=1                                                        | 4  | 2 | 2 | 2 | 733  | 80.6  | 7.46 | 4.81 | 2 | 1 |
| -6.3E+18 | IsMasterProtein | A0A8C4Z967 | ZP domain-containing protein OS=Gadus morhua OX=8049 PE=4 SV=1                                              | 6  | 2 | 2 | 2 | 923  | 103.6 | 6.16 | 6.18 | 2 | 1 |
| -6.3E+18 | IsMasterProtein | A0A8C4ZBB3 | NOP9 nucleolar protein OS=Gadus morhua OX=8049 GN=nop9 PE=4 SV=1                                            | 8  | 2 | 2 | 2 | 617  | 67.9  | 8.12 | 5.07 | 2 | 1 |
| -6.3E+18 | IsMasterProtein | A0A8C5BW75 | RELT like 2 OS=Gadus morhua OX=8049 GN=rel2 PE=3 SV=1                                                       | 6  | 2 | 2 | 2 | 810  | 86.1  | 6.77 | 5.23 | 2 | 1 |
| -6.3E+18 | IsMasterProtein | A0A8C5C6E8 | Sorbin and SH3 domain containing 2 OS=Gadus morhua OX=8049 GN=SORBS2 PE=4 SV=1                              | 2  | 2 | 2 | 2 | 1243 | 136.9 | 7.87 | 4.75 | 2 | 1 |
| -6.3E+18 | IsMasterProtein | A0A8C5CZM7 | Metalloendopeptidase OS=Gadus morhua OX=8049 GN=LOC115555288 PE=4 SV=1                                      | 10 | 2 | 2 | 2 | 670  | 75.6  | 8.18 | 6.41 | 2 | 1 |
| -6.2E+18 | IsMasterProtein | A0A8C5CQU9 | Kinesin family member 5A OS=Gadus morhua OX=8049 GN=KIF5A PE=3 SV=1                                         | 4  | 2 | 2 | 2 | 1129 | 128.9 | 5.11 | 5.08 | 2 | 1 |
| -6.2E+18 | IsMasterProtein | A0A8C5C1Z9 | Uncharacterized protein OS=Gadus morhua OX=8049 PE=3 SV=1                                                   | 7  | 2 | 2 | 2 | 618  | 69.3  | 9.83 | 5.49 | 2 | 1 |
| -6.2E+18 | IsMasterProtein | A0A8C5AXJ3 | Voltage-dependent anion-selective channel protein 1 OS=Gadus morhua OX=8049 GN=vdac1 PE=3 SV=1              | 7  | 2 | 2 | 2 | 310  | 33.7  | 9.22 | 4.51 | 2 | 1 |

|          |                 |            |                                                                                                         |    |   |   |   |      |       |      |       |   |   |
|----------|-----------------|------------|---------------------------------------------------------------------------------------------------------|----|---|---|---|------|-------|------|-------|---|---|
| -6.2E+18 | IsMasterProtein | A0A8C5AVC3 | Coiled-coil-helix-coiled-coil-helix domain containing 3a OS=Gadus morhua OX=8049 GN=chcd3a PE=4 SV=1    | 5  | 2 | 2 | 2 | 599  | 63.4  | 5.11 | 5.12  | 2 | 1 |
| -6.2E+18 | IsMasterProtein | A0A8C5AWE7 | Polycystic kidney and hepatic disease 1 (autosomal recessive)-like 1 OS=Gadus morhua OX=8049 PE=4 SV=1  | 1  | 2 | 2 | 2 | 3642 | 393   | 5.85 | 4.29  | 2 | 1 |
| -6.2E+18 | IsMasterProtein | A0A8C5ASG7 | Lamin A/C OS=Gadus morhua OX=8049 GN=LMNA PE=3 SV=1                                                     | 5  | 3 | 3 | 2 | 591  | 67.2  | 6.46 | 7.64  | 3 | 1 |
| -6.2E+18 | IsMasterProtein | A0A8C5BBR9 | Activating signal cointegrator 1 complex subunit 3 OS=Gadus morhua OX=8049 GN=ascc3 PE=3 SV=1           | 3  | 2 | 5 | 2 | 2209 | 248.8 | 6.87 | 15.57 | 2 | 1 |
| -6.2E+18 | IsMasterProtein | A0A8C4Z658 | Creatine kinase OS=Gadus morhua OX=8049 GN=CKMT2 PE=3 SV=1                                              | 14 | 3 | 4 | 2 | 435  | 49    | 8.03 | 12.8  | 3 | 1 |
| -6.2E+18 | IsMasterProtein | A0A8C5AM78 | Protein Wnt OS=Gadus morhua OX=8049 GN=LOC115545792 PE=3 SV=1                                           | 14 | 2 | 2 | 2 | 350  | 39.3  | 9.16 | 5.45  | 2 | 1 |
| -6.2E+18 | IsMasterProtein | A0A8C4Z6M2 | YjeF N-terminal domain containing 3 OS=Gadus morhua OX=8049 GN=yjefn3 PE=4 SV=1                         | 8  | 2 | 2 | 2 | 246  | 27.3  | 5.31 | 4.79  | 2 | 1 |
| -6.2E+18 | IsMasterProtein | A0A8C4Z8M1 | Mitogen-activated protein kinase binding protein 1 OS=Gadus morhua OX=8049 PE=4 SV=1                    | 3  | 2 | 2 | 2 | 1138 | 122.2 | 7.2  | 4.94  | 2 | 1 |
| -6.1E+18 | IsMasterProtein | A0A8C5BBX0 | Uncharacterized protein OS=Gadus morhua OX=8049 PE=3 SV=1                                               | 5  | 2 | 2 | 2 | 597  | 69    | 6.83 | 5.5   | 2 | 1 |
| -6.1E+18 | IsMasterProtein | A0A8C4ZZT7 | GTP-binding nuclear protein Ran OS=Gadus morhua OX=8049 PE=3 SV=1                                       | 11 | 2 | 2 | 2 | 229  | 26.1  | 7.02 | 5.6   | 2 | 1 |
| -6.1E+18 | IsMasterProtein | A0A8C4ZW02 | Chromosome 4 C2orf42 homolog OS=Gadus morhua OX=8049 GN=c4h2orf42 PE=4 SV=1                             | 5  | 2 | 2 | 2 | 699  | 75.4  | 8.07 | 4.53  | 2 | 1 |
| -6.1E+18 | IsMasterProtein | A0A8C5AQ42 | Ig-like domain-containing protein OS=Gadus morhua OX=8049 PE=4 SV=1                                     | 12 | 2 | 2 | 2 | 472  | 50    | 8.91 | 5.46  | 2 | 1 |
| -6.1E+18 | IsMasterProtein | A0A8C5BH51 | Uncharacterized protein OS=Gadus morhua OX=8049 PE=4 SV=1                                               | 3  | 2 | 2 | 2 | 652  | 69.9  | 7.9  | 4.67  | 2 | 1 |
| -6.1E+18 | IsMasterProtein | A0A8C5C654 | Tight junction protein 1b OS=Gadus morhua OX=8049 GN=tjp1b PE=3 SV=1                                    | 3  | 2 | 2 | 2 | 1769 | 196.2 | 7.12 | 5.44  | 2 | 1 |
| -6.1E+18 | IsMasterProtein | A0A8C5C282 | Methylcrotonoyl-CoA carboxylase OS=Gadus morhua OX=8049 GN=mccc2 PE=3 SV=1                              | 9  | 2 | 2 | 2 | 522  | 57.4  | 8.68 | 5.45  | 2 | 1 |
| -6.1E+18 | IsMasterProtein | A0A8C5A4K3 | Membrane associated guanylate kinase, WW and PDZ domain containing 2b OS=Gadus morhua OX=8049 PE=4 SV=1 | 5  | 2 | 4 | 2 | 1269 | 138   | 5.97 | 12.34 | 2 | 1 |
| -6.1E+18 | IsMasterProtein | A0A8C5BFH5 | Non-lysosomal glucosylceramidase OS=Gadus morhua OX=8049 GN=gba2 PE=3 SV=1                              | 8  | 2 | 2 | 2 | 862  | 96.9  | 6.16 | 6.18  | 2 | 1 |
| -6.1E+18 | IsMasterProtein | A0A8C4ZE90 | Glycerophosphodiester phosphodiesterase domain containing 4b OS=Gadus morhua OX=8049 PE=3 SV=1          | 10 | 2 | 2 | 2 | 366  | 40.5  | 6.01 | 5.82  | 2 | 1 |
| -6.1E+18 | IsMasterProtein | A0A8C5BT04 | Myosin IHa OS=Gadus morhua OX=8049 PE=3 SV=1                                                            | 4  | 2 | 2 | 2 | 1014 | 116.7 | 8.44 | 4.72  | 2 | 1 |
| -6.1E+18 | IsMasterProtein | A0A8C4ZQI8 | Periphrin 1 OS=Gadus morhua OX=8049 GN=pphln1 PE=4 SV=1                                                 | 11 | 2 | 2 | 2 | 403  | 44.5  | 7.09 | 5.22  | 2 | 1 |
| -6.1E+18 | IsMasterProtein | A0A8C4ZQ08 | FYVE and coiled-coil domain autophagy adaptor 1a OS=Gadus morhua OX=8049 GN=fyco1a PE=4 SV=1            | 3  | 2 | 3 | 2 | 1492 | 168.2 | 5.38 | 8.2   | 2 | 1 |
| -6.1E+18 | IsMasterProtein | A0A8C4ZD71 | Homer scaffold protein 1 OS=Gadus morhua OX=8049 GN=HOMER1 PE=3 SV=1                                    | 12 | 2 | 2 | 2 | 358  | 40.1  | 5.41 | 5.58  | 2 | 1 |
| -6.1E+18 | IsMasterProtein | A0A8C5CIN1 | Dedicator of cytokinesis 8 OS=Gadus morhua OX=8049 GN=dock8 PE=3 SV=1                                   | 3  | 2 | 2 | 2 | 1902 | 216   | 6.64 | 5.62  | 2 | 1 |
| -6.1E+18 | IsMasterProtein | A0A8C4ZYA4 | Uncharacterized protein OS=Gadus morhua OX=8049 PE=3 SV=1                                               | 6  | 2 | 2 | 2 | 438  | 48.8  | 8.53 | 5     | 2 | 1 |
| -6E+18   | IsMasterProtein | A0A8C5A3B3 | Apical junction component 1 homolog OS=Gadus morhua OX=8049 GN=ajm1 PE=4 SV=1                           | 4  | 2 | 2 | 2 | 1087 | 123.5 | 8    | 5.88  | 2 | 1 |
| -6E+18   | IsMasterProtein | A0A8C4ZEJ8 | WWC family member 3 OS=Gadus morhua OX=8049 GN=wwc3 PE=4 SV=1                                           | 3  | 2 | 2 | 2 | 1095 | 122.9 | 6.81 | 4.59  | 2 | 1 |
| -6E+18   | IsMasterProtein | A0A8C4ZH41 | Secreted frizzled-related protein 3 OS=Gadus morhua OX=8049 PE=3 SV=1                                   | 6  | 2 | 2 | 2 | 294  | 32.8  | 8.31 | 5     | 2 | 1 |
| -6E+18   | IsMasterProtein | A0A8C5F5P1 | Cytochrome P450 1A OS=Gadus morhua OX=8049 GN=LOC115560135 PE=3 SV=1                                    | 10 | 2 | 4 | 2 | 530  | 60    | 8.03 | 8.9   | 2 | 1 |
| -6E+18   | IsMasterProtein | A0A8C5CH22 | Non-specific serine/threonine protein kinase OS=Gadus morhua OX=8049 GN=slka PE=4 SV=1                  | 2  | 2 | 2 | 2 | 1149 | 130.2 | 5.01 | 4.86  | 2 | 1 |
| -6E+18   | IsMasterProtein | A0A8C5BC48 | N-acetylglucosamine-1-phosphate transferase subunits alpha and beta OS=Gadus morhua OX=8049 PE=3 SV=1   | 4  | 2 | 2 | 2 | 1246 | 138.6 | 7.17 | 5.8   | 2 | 1 |
| -6E+18   | IsMasterProtein | A0A8C5CJH6 | AT-rich interactive domain-containing protein 1B-like OS=Gadus morhua OX=8049 GN=ARID1B PE=4 SV=1       | 2  | 2 | 2 | 2 | 2324 | 245.5 | 6.8  | 5.03  | 2 | 1 |
| -6E+18   | IsMasterProtein | A0A8C5FN89 | Protein-glucosylgalactosylhydroxyllysine glucosidase OS=Gadus morhua OX=8049 PE=4 SV=1                  | 3  | 2 | 2 | 2 | 699  | 77.7  | 5.21 | 4.78  | 2 | 1 |
| -6E+18   | IsMasterProtein | A0A8C5B9Y7 | Uncharacterized protein OS=Gadus morhua OX=8049 PE=4 SV=1                                               | 6  | 2 | 2 | 2 | 671  | 74.4  | 6.32 | 5.31  | 2 | 1 |
| -6E+18   | IsMasterProtein | A0A8C5B4L0 | Kinesin family member 7 OS=Gadus morhua OX=8049 GN=kif7 PE=3 SV=1                                       | 3  | 2 | 2 | 2 | 1218 | 136.4 | 8.05 | 5.22  | 2 | 1 |
| -6E+18   | IsMasterProtein | A0A8C5B382 | Non-specific serine/threonine protein kinase OS=Gadus morhua OX=8049 GN=LOC115544349 PE=4 SV=1          | 5  | 2 | 2 | 2 | 717  | 80.3  | 8.72 | 5.22  | 2 | 1 |



|          |                 |             |                                                                                                               |    |    |    |   |      |       |       |       |    |   |
|----------|-----------------|-------------|---------------------------------------------------------------------------------------------------------------|----|----|----|---|------|-------|-------|-------|----|---|
| -6E+18   | IsMasterProtein | A0A8C5BQL4  | Uncharacterized protein OS=Gadus morhua OX=8049 PE=3 SV=1                                                     | 5  | 2  | 2  | 2 | 1091 | 119.9 | 7.27  | 5.74  | 2  | 1 |
| -6E+18   | IsMasterProtein | A0A8C5A0D4  | Arf-GAP domain-containing protein OS=Gadus morhua OX=8049 PE=4 SV=1                                           | 8  | 2  | 3  | 2 | 481  | 52.6  | 9     | 4.91  | 2  | 1 |
| -6E+18   | IsMasterProtein | A0A8C5C2Y2  | Transmembrane channel-like protein OS=Gadus morhua OX=8049 GN=TMCI PE=3 SV=1                                  | 5  | 2  | 2  | 2 | 730  | 83.9  | 6.19  | 4.82  | 2  | 1 |
| -6E+18   | IsMasterProtein | A0A8C5CWF0  | Zinc finger protein 532 OS=Gadus morhua OX=8049 GN=znf532 PE=3 SV=1                                           | 2  | 2  | 2  | 2 | 1369 | 147.8 | 8.81  | 4.91  | 2  | 1 |
| -6E+18   | IsMasterProtein | A0A8C5BX34  | Tropomyosin alpha-1 chain-like OS=Gadus morhua OX=8049 GN=LOC115548938 PE=3 SV=1                              | 20 | 5  | 5  | 2 | 247  | 28.4  | 4.68  | 15.09 | 5  | 1 |
| -6E+18   | IsMasterProtein | A0A8C5BFP6  | YME1 like 1 ATPase OS=Gadus morhua OX=8049 GN=yml11 PE=3 SV=1                                                 | 5  | 2  | 2  | 2 | 711  | 78.1  | 7.87  | 5.82  | 2  | 1 |
| -5.9E+18 | IsMasterProtein | A0A8C5AHG7  | Tyrosine-protein kinase OS=Gadus morhua OX=8049 GN=abl2 PE=3 SV=1                                             | 4  | 2  | 2  | 2 | 1133 | 122   | 7.85  | 5.29  | 2  | 1 |
| -5.9E+18 | IsMasterProtein | A0A8C5D195  | PPARG related coactivator 1 OS=Gadus morhua OX=8049 GN=pprc1 PE=4 SV=1                                        | 3  | 2  | 2  | 2 | 1314 | 141.6 | 8.78  | 5.27  | 2  | 1 |
| -5.9E+18 | IsMasterProtein | A0A8C4Z1K8  | Uncharacterized protein OS=Gadus morhua OX=8049 PE=4 SV=1                                                     | 3  | 2  | 2  | 2 | 1635 | 180.6 | 6.21  | 5.73  | 2  | 1 |
| -5.9E+18 | IsMasterProtein | A0A8C5AFL1  | Voltage-dependent L-type calcium channel subunit alpha OS=Gadus morhua OX=8049 PE=3 SV=1                      | 3  | 2  | 2  | 2 | 2084 | 235.1 | 7.15  | 5.36  | 2  | 1 |
| -5.9E+18 | IsMasterProtein | A0A8C4ZPL9  | Ankyrin repeat and SOCS box containing 7 OS=Gadus morhua OX=8049 GN=asb7 PE=4 SV=1                            | 16 | 2  | 2  | 2 | 343  | 38.5  | 8.51  | 5.54  | 2  | 1 |
| -5.9E+18 | IsMasterProtein | A0A8C4ZTH9  | Ras-related protein Rap-1b OS=Gadus morhua OX=8049 GN=LOC115550068 PE=4 SV=1                                  | 15 | 2  | 2  | 2 | 185  | 21.1  | 6.71  | 6.1   | 2  | 1 |
| -5.9E+18 | IsMasterProtein | A0A8C4YXM1  | 60S ribosomal protein L13 OS=Gadus morhua OX=8049 PE=3 SV=1                                                   | 9  | 2  | 2  | 2 | 234  | 26.7  | 11.44 | 4.83  | 2  | 1 |
| -5.9E+18 | IsMasterProtein | A0A8C5C390  | Proline-rich coiled-coil 1 OS=Gadus morhua OX=8049 GN=prrc1 PE=3 SV=1                                         | 11 | 2  | 2  | 2 | 397  | 41.6  | 5.48  | 5.61  | 2  | 1 |
| -5.9E+18 | IsMasterProtein | A0A8C5CV58  | COP9 signalosome subunit 5 OS=Gadus morhua OX=8049 GN=cops5 PE=3 SV=1                                         | 10 | 2  | 2  | 2 | 334  | 37.5  | 6.54  | 4.85  | 2  | 1 |
| -5.9E+18 | IsMasterProtein | A0A8C4ZH42  | Insulin-like growth factor-binding protein 4 OS=Gadus morhua OX=8049 PE=4 SV=1                                | 14 | 2  | 2  | 2 | 245  | 26.6  | 7.99  | 5.84  | 2  | 1 |
| -5.9E+18 | IsMasterProtein | A0A8C5AGY3  | Katanin p80 subunit B-like 1 OS=Gadus morhua OX=8049 PE=4 SV=1                                                | 9  | 2  | 2  | 2 | 318  | 35.8  | 7.88  | 4.85  | 2  | 1 |
| -5.8E+18 | IsMasterProtein | A0A8C5F4W0  | Amyloid beta (A4) precursor protein-binding, family A, member 2a OS=Gadus morhua OX=8049 GN=apba2a PE=4 SV=1  | 6  | 2  | 2  | 2 | 868  | 93.9  | 5.88  | 5.95  | 2  | 1 |
| -5.8E+18 | IsMasterProtein | A0A8C4ZS48  | Histone H1-like OS=Gadus morhua OX=8049 GN=LOC115560160 PE=3 SV=1                                             | 12 | 2  | 2  | 2 | 188  | 19.7  | 10.92 | 4.99  | 2  | 1 |
| -5.8E+18 | IsMasterProtein | A0A8C5ADX5  | Uncharacterized protein OS=Gadus morhua OX=8049 PE=4 SV=1                                                     | 12 | 2  | 2  | 2 | 480  | 54.1  | 7.18  | 5.53  | 2  | 1 |
| -5.8E+18 | IsMasterProtein | A0A8C5FA99  | Uncharacterized protein OS=Gadus morhua OX=8049 PE=3 SV=1                                                     | 13 | 2  | 2  | 2 | 296  | 31.7  | 6.79  | 5.23  | 2  | 1 |
| -5.8E+18 | IsMasterProtein | A0A8C4Z1W1  | Lectin, mannose-binding, 1 OS=Gadus morhua OX=8049 PE=4 SV=1                                                  | 8  | 2  | 2  | 2 | 566  | 63.9  | 8.05  | 6.45  | 2  | 1 |
| -5.8E+18 | IsMasterProtein | A0A8C5CU97  | H(+)-transporting two-sector ATPase OS=Gadus morhua OX=8049 GN=LOC115547679 PE=3 SV=1                         | 25 | 12 | 13 | 2 | 618  | 68.4  | 5.44  | 41.51 | 12 | 1 |
| -5.8E+18 | IsMasterProtein | A0A8C5FDR6  | Uncharacterized protein OS=Gadus morhua OX=8049 PE=3 SV=1                                                     | 4  | 2  | 2  | 2 | 1119 | 126   | 9.31  | 5.12  | 2  | 1 |
| -5.8E+18 | IsMasterProtein | A0A8C4ZSQ2  | YTH N(6)-methyladenosine RNA binding protein 3 OS=Gadus morhua OX=8049 GN=ythd3 PE=4 SV=1                     | 10 | 2  | 2  | 2 | 614  | 67.3  | 8.82  | 5.17  | 2  | 1 |
| -5.8E+18 | IsMasterProtein | A0A8C5AA86  | Protein MTO1 homolog, mitochondrial OS=Gadus morhua OX=8049 PE=4 SV=1                                         | 4  | 2  | 2  | 2 | 685  | 75    | 8.22  | 5.46  | 2  | 1 |
| -5.8E+18 | IsMasterProtein | A0A8C5C1F8  | Apoptosis inducing factor mitochondrion associated 1 OS=Gadus morhua OX=8049 GN=aifm1 PE=3 SV=1               | 5  | 2  | 4  | 2 | 574  | 62.3  | 7.11  | 11.06 | 2  | 1 |
| -5.8E+18 | IsMasterProtein | A0A8C5FDI7  | Inhibin subunit beta C OS=Gadus morhua OX=8049 GN=INHBC PE=3 SV=1                                             | 8  | 2  | 2  | 2 | 479  | 53.5  | 8.41  | 5.35  | 2  | 1 |
| -5.8E+18 | IsMasterProtein | A0A8C5F8Q7  | NPC intracellular cholesterol transporter 2 OS=Gadus morhua OX=8049 GN=npct2 PE=3 SV=1                        | 22 | 2  | 2  | 2 | 149  | 16.4  | 5.45  | 5.03  | 2  | 1 |
| -5.8E+18 | IsMasterProtein | A0A8C5B8F6  | Histidine decarboxylase OS=Gadus morhua OX=8049 PE=3 SV=1                                                     | 4  | 2  | 2  | 2 | 645  | 72    | 6.21  | 4.76  | 2  | 1 |
| -5.8E+18 | IsMasterProtein | A0A8C4ZF52  | Minichromosome maintenance complex component 3 associated protein OS=Gadus morhua OX=8049 GN=mcm3ap PE=4 SV=1 | 1  | 2  | 2  | 2 | 2153 | 234.9 | 6.52  | 5.53  | 2  | 1 |
| -5.7E+18 | IsMasterProtein | A0A8C5B618  | Large tumor suppressor kinase 2 OS=Gadus morhua OX=8049 PE=4 SV=1                                             | 3  | 2  | 2  | 2 | 1105 | 121.4 | 8.56  | 4.94  | 2  | 1 |
| -5.7E+18 | IsMasterProtein | A0A8C5C3K0  | Pleckstrin homology-like domain, family B, member 2b OS=Gadus morhua OX=8049 GN=phldb2b PE=4 SV=1             | 3  | 2  | 2  | 2 | 1447 | 159.1 | 6.6   | 6.46  | 2  | 1 |
| -5.7E+18 | IsMasterProtein | A0A8C5APR3  | Uncharacterized protein OS=Gadus morhua OX=8049 PE=4 SV=1                                                     | 3  | 2  | 2  | 2 | 1533 | 171.9 | 6.3   | 4.17  | 2  | 1 |
| -5.7E+18 | IsMasterProtein | cRAP_Q15323 | Keratin, type I cuticular Ha1 OS=Homo sapiens GN=KRT31 PE=2 SV=3                                              | 24 | 9  | 9  | 2 | 416  | 47.2  | 4.88  | 26.52 | 9  | 1 |

|          |                 |            |                                                                                                             |    |   |   |   |      |       |       |       |   |   |
|----------|-----------------|------------|-------------------------------------------------------------------------------------------------------------|----|---|---|---|------|-------|-------|-------|---|---|
| -5.7E+18 | IsMasterProtein | A0A8C5FKG2 | Casein kinase II subunit beta OS=Gadus morhua OX=8049 GN=csnk2b PE=3 SV=1                                   | 23 | 2 | 2 | 2 | 225  | 25.8  | 5.43  | 6.55  | 2 | 1 |
| -5.7E+18 | IsMasterProtein | A0A8C5AW46 | EH domain binding protein 1 OS=Gadus morhua OX=8049 GN=ehbp1 PE=4 SV=1                                      | 4  | 2 | 2 | 2 | 1101 | 123.4 | 6.99  | 5.36  | 2 | 1 |
| -5.7E+18 | IsMasterProtein | A0A8C4ZJH0 | Peptidylprolyl isomerase (cyclophilin)-like 6 OS=Gadus morhua OX=8049 GN=PPIL6 PE=4 SV=1                    | 14 | 2 | 2 | 2 | 313  | 35.2  | 6.87  | 5.73  | 2 | 1 |
| -5.7E+18 | IsMasterProtein | A0A8C5CJH3 | Transient receptor potential cation channel subfamily A member 1 OS=Gadus morhua OX=8049 GN=trpa1 PE=4 SV=1 | 5  | 2 | 4 | 2 | 1073 | 119.6 | 7.24  | 10.82 | 2 | 1 |
| -5.7E+18 | IsMasterProtein | A0A8C5BGQ8 | Anion exchange protein OS=Gadus morhua OX=8049 PE=3 SV=1                                                    | 3  | 2 | 2 | 2 | 1045 | 116.8 | 7.94  | 4.94  | 2 | 1 |
| -5.6E+18 | IsMasterProtein | A0A8C5BXT3 | G protein-coupled receptor kinase OS=Gadus morhua OX=8049 PE=3 SV=1                                         | 8  | 2 | 2 | 2 | 601  | 68.5  | 6.64  | 5.73  | 2 | 1 |
| -5.6E+18 | IsMasterProtein | A0A8C4ZI51 | Oxysterol-binding protein OS=Gadus morhua OX=8049 PE=3 SV=1                                                 | 3  | 2 | 2 | 2 | 846  | 95.9  | 7.5   | 6.27  | 2 | 1 |
| -5.6E+18 | IsMasterProtein | A0A8C5BRS7 | CULLIN_2 domain-containing protein OS=Gadus morhua OX=8049 PE=3 SV=1                                        | 5  | 2 | 2 | 2 | 788  | 91.6  | 7.93  | 5.34  | 2 | 1 |
| -5.6E+18 | IsMasterProtein | A0A8C5BD00 | Synaptopodin OS=Gadus morhua OX=8049 GN=synpo PE=4 SV=1                                                     | 5  | 2 | 2 | 2 | 1067 | 113   | 9     | 5.83  | 2 | 1 |
| -5.6E+18 | IsMasterProtein | A0A8C5CMQ0 | Synaptotagmin-like 5 OS=Gadus morhua OX=8049 GN=sytl5 PE=4 SV=1                                             | 3  | 2 | 2 | 2 | 730  | 81.8  | 8.24  | 5.3   | 2 | 1 |
| -5.6E+18 | IsMasterProtein | A0A8C5BYB6 | Rho GTPase activating protein 23b OS=Gadus morhua OX=8049 PE=4 SV=1                                         | 2  | 2 | 4 | 2 | 1377 | 152.3 | 8.25  | 10.3  | 2 | 1 |
| -5.6E+18 | IsMasterProtein | A0A8C4ZD78 | RNA helicase OS=Gadus morhua OX=8049 PE=3 SV=1                                                              | 6  | 2 | 4 | 2 | 799  | 89.9  | 8     | 10.7  | 2 | 1 |
| -5.6E+18 | IsMasterProtein | A0A8C4YTH2 | Dynein, axonemal, heavy chain 7 OS=Gadus morhua OX=8049 GN=dnah7 PE=3 SV=1                                  | 1  | 2 | 2 | 2 | 3869 | 439.3 | 5.87  | 4.49  | 2 | 1 |
| -5.6E+18 | IsMasterProtein | A0A8C5B6X5 | Midasin AAA ATPase 1 OS=Gadus morhua OX=8049 GN=MDN1 PE=4 SV=1                                              | 5  | 2 | 2 | 2 | 895  | 96.4  | 6.47  | 5.97  | 2 | 1 |
| -5.6E+18 | IsMasterProtein | A0A8C4ZAV8 | Tudor and KH domain containing OS=Gadus morhua OX=8049 GN=tdrkh PE=4 SV=1                                   | 7  | 2 | 2 | 2 | 567  | 61.6  | 4.97  | 4.7   | 2 | 1 |
| -5.6E+18 | IsMasterProtein | A0A8C4ZG00 | Zinc finger protein 106a OS=Gadus morhua OX=8049 PE=4 SV=1                                                  | 5  | 2 | 4 | 2 | 1293 | 139.7 | 6.8   | 12.39 | 2 | 1 |
| -5.5E+18 | IsMasterProtein | A0A8C5C7G7 | Smoothelin a OS=Gadus morhua OX=8049 PE=4 SV=1                                                              | 25 | 2 | 2 | 2 | 182  | 20.9  | 8.53  | 5.05  | 2 | 1 |
| -5.5E+18 | IsMasterProtein | A0A8C5B7Q4 | Uncharacterized protein OS=Gadus morhua OX=8049 PE=4 SV=1                                                   | 2  | 2 | 2 | 2 | 1023 | 112.8 | 4.81  | 4.48  | 2 | 1 |
| -5.5E+18 | IsMasterProtein | A0A8C4Z6I5 | Transcription factor HIVP3-like OS=Gadus morhua OX=8049 GN=LOC11554356 PE=4 SV=1                            | 1  | 2 | 2 | 2 | 2033 | 218.5 | 8.5   | 4.57  | 2 | 1 |
| -5.5E+18 | IsMasterProtein | A0A8C5AFK8 | Uncharacterized protein OS=Gadus morhua OX=8049 PE=4 SV=1                                                   | 3  | 2 | 2 | 2 | 1160 | 132.1 | 7.06  | 4.74  | 2 | 1 |
| -5.5E+18 | IsMasterProtein | A0A8C5F7Z5 | Speckle targeted PIP5K1A-regulated poly(A) polymerase OS=Gadus morhua OX=8049 GN=tut1 PE=3 SV=1             | 6  | 2 | 2 | 2 | 789  | 88.2  | 7.02  | 5.96  | 2 | 1 |
| -5.5E+18 | IsMasterProtein | A0A8C5A0J2 | Forkhead box A3 OS=Gadus morhua OX=8049 GN=foxa3 PE=4 SV=1                                                  | 4  | 2 | 2 | 2 | 473  | 50.2  | 7.93  | 4.4   | 2 | 1 |
| -5.5E+18 | IsMasterProtein | A0A8C5AM94 | Exocyst complex component 5 OS=Gadus morhua OX=8049 GN=exoc5 PE=3 SV=1                                      | 8  | 2 | 2 | 2 | 694  | 79    | 6.7   | 7.01  | 2 | 1 |
| -5.5E+18 | IsMasterProtein | A0A8C4ZSX2 | Uncharacterized protein OS=Gadus morhua OX=8049 PE=3 SV=1                                                   | 3  | 2 | 2 | 2 | 1084 | 118.1 | 7.77  | 5.44  | 2 | 1 |
| -5.5E+18 | IsMasterProtein | A0A8C5CBL0 | Uncharacterized protein OS=Gadus morhua OX=8049 PE=4 SV=1                                                   | 5  | 2 | 2 | 2 | 657  | 76.1  | 6.35  | 4.81  | 2 | 1 |
| -5.5E+18 | IsMasterProtein | A0A8C4ZKM0 | Serine and arginine rich splicing factor 11 OS=Gadus morhua OX=8049 GN=SRSF11 PE=4 SV=1                     | 6  | 2 | 2 | 2 | 469  | 53.4  | 10.84 | 5.71  | 2 | 1 |
| -5.5E+18 | IsMasterProtein | A0A8C5A439 | RAP1, GTP-GDP dissociation stimulator 1 OS=Gadus morhua OX=8049 GN=rap1gds1 PE=4 SV=1                       | 8  | 2 | 2 | 2 | 514  | 55.8  | 5.47  | 7.62  | 2 | 1 |
| -5.5E+18 | IsMasterProtein | A0A8C4ZMH8 | Uncharacterized protein OS=Gadus morhua OX=8049 PE=3 SV=1                                                   | 2  | 2 | 2 | 2 | 1961 | 218.3 | 7.64  | 4.87  | 2 | 1 |
| -5.4E+18 | IsMasterProtein | A0A8C4Z7J5 | Membrane associated guanylate kinase, WW and PDZ domain containing 3b OS=Gadus morhua OX=8049 PE=4 SV=1     | 1  | 2 | 2 | 2 | 1412 | 151.6 | 8.63  | 4.71  | 2 | 1 |
| -5.4E+18 | IsMasterProtein | A0A8C4Z489 | SET domain bifurcated histone lysine methyltransferase 1b OS=Gadus morhua OX=8049 GN=setdb1b PE=4 SV=1      | 3  | 2 | 2 | 2 | 1253 | 138.5 | 7.03  | 5.42  | 2 | 1 |
| -5.4E+18 | IsMasterProtein | A0A8C5B2Y3 | Ral GTPase activating protein catalytic subunit alpha 2 OS=Gadus morhua OX=8049 GN=ralgapa2 PE=4 SV=1       | 3  | 2 | 3 | 2 | 1905 | 212.8 | 7.42  | 7.27  | 2 | 1 |
| -5.4E+18 | IsMasterProtein | A0A8C5CXF0 | RFX-type winged-helix domain-containing protein OS=Gadus morhua OX=8049 PE=4 SV=1                           | 4  | 2 | 2 | 2 | 672  | 75.1  | 7.08  | 4.51  | 2 | 1 |
| -5.4E+18 | IsMasterProtein | A0A8C5A4T6 | Lethal(3)malignant brain tumor-like protein 2 OS=Gadus morhua OX=8049 GN=l3mbtl2 PE=4 SV=1                  | 14 | 2 | 5 | 2 | 592  | 65.3  | 8.27  | 15.73 | 2 | 1 |
| -5.4E+18 | IsMasterProtein | A0A8C4Z4Q9 | Uncharacterized protein OS=Gadus morhua OX=8049 PE=4 SV=1                                                   | 3  | 2 | 2 | 2 | 998  | 108.9 | 5.49  | 4.61  | 2 | 1 |
| -5.4E+18 | IsMasterProtein | A0A8C5BS05 | Sulfite oxidase OS=Gadus morhua OX=8049 GN=suox PE=4 SV=1                                                   | 7  | 2 | 2 | 2 | 610  | 65.7  | 6.34  | 4.68  | 2 | 1 |

|          |                 |            |                                                                                                       |    |   |   |   |      |       |      |       |   |   |
|----------|-----------------|------------|-------------------------------------------------------------------------------------------------------|----|---|---|---|------|-------|------|-------|---|---|
| -5.4E+18 | IsMasterProtein | A0A8C4ZS70 | V-type proton ATPase subunit C OS=Gadus morhua OX=8049<br>GN=ATP6VIC1 PE=3 SV=1                       | 5  | 2 | 2 | 2 | 389  | 44.8  | 7.46 | 4.21  | 2 | 1 |
| -5.4E+18 | IsMasterProtein | A0A8C5FRX7 | Uncharacterized protein OS=Gadus morhua OX=8049 PE=3 SV=1                                             | 10 | 2 | 2 | 2 | 257  | 29.1  | 5.24 | 4.7   | 2 | 1 |
| -5.4E+18 | IsMasterProtein | A0A8C5BM58 | Coiled-coil domain containing 57 OS=Gadus morhua OX=8049 GN=CCDC57<br>PE=4 SV=1                       | 5  | 2 | 2 | 2 | 1033 | 115.6 | 6.9  | 5.58  | 2 | 1 |
| -5.4E+18 | IsMasterProtein | A0A8C5B3W2 | Vir like m6A methyltransferase associated OS=Gadus morhua OX=8049<br>GN=virma PE=3 SV=1               | 2  | 2 | 2 | 2 | 1781 | 190.4 | 5.88 | 4.89  | 2 | 1 |
| -5.4E+18 | IsMasterProtein | A0A8C5ASK8 | Choline O-acetyltransferase-like OS=Gadus morhua OX=8049<br>GN=LOC115531689 PE=3 SV=1                 | 8  | 2 | 2 | 2 | 625  | 69.5  | 8.47 | 6.73  | 2 | 1 |
| -5.4E+18 | IsMasterProtein | A0A8C5CCJ9 | Uncharacterized protein OS=Gadus morhua OX=8049 PE=4 SV=1                                             | 9  | 2 | 3 | 2 | 410  | 45.9  | 9.14 | 7.17  | 2 | 1 |
| -5.4E+18 | IsMasterProtein | A0A8C5F4S3 | Uncharacterized protein OS=Gadus morhua OX=8049 PE=4 SV=1                                             | 2  | 2 | 2 | 2 | 1070 | 112.4 | 6.11 | 4.67  | 2 | 1 |
| -5.3E+18 | IsMasterProtein | A0A8C4ZEK1 | Neurofilament, light polypeptide b OS=Gadus morhua OX=8049 GN=neflb<br>PE=3 SV=1                      | 4  | 2 | 2 | 2 | 642  | 71.4  | 4.36 | 5.8   | 2 | 1 |
| -5.3E+18 | IsMasterProtein | A0A8C4YTM7 | Discs, large homolog 5b (Drosophila), tandem duplicate 1 OS=Gadus morhua<br>OX=8049 GN=DLG5 PE=3 SV=1 | 2  | 3 | 3 | 2 | 1934 | 214.8 | 6.96 | 6.75  | 3 | 1 |
| -5.3E+18 | IsMasterProtein | A0A8C5FPM4 | Mitogen-activated protein kinase OS=Gadus morhua OX=8049 GN=mapk3<br>PE=3 SV=1                        | 11 | 3 | 3 | 2 | 375  | 43.1  | 7.72 | 8.7   | 3 | 1 |
| -5.3E+18 | IsMasterProtein | A0A8C5FMM0 | AT-rich interaction domain 4B OS=Gadus morhua OX=8049 GN=arid4b<br>PE=4 SV=1                          | 3  | 2 | 2 | 2 | 1318 | 145.7 | 5.35 | 5.43  | 2 | 1 |
| -5.3E+18 | IsMasterProtein | A0A8C4ZGP5 | Uncharacterized protein OS=Gadus morhua OX=8049 PE=3 SV=1                                             | 4  | 2 | 2 | 2 | 988  | 113.8 | 9.5  | 5.76  | 2 | 1 |
| -5.3E+18 | IsMasterProtein | A0A8C4ZB06 | Kelch-like family member 30 OS=Gadus morhua OX=8049 PE=4 SV=1                                         | 7  | 2 | 2 | 2 | 561  | 62.7  | 5.55 | 4.8   | 2 | 1 |
| -5.3E+18 | IsMasterProtein | A0A8C5B053 | Uncharacterized protein OS=Gadus morhua OX=8049 PE=4 SV=1                                             | 2  | 8 | 8 | 2 | 7121 | 788.8 | 5.29 | 21.18 | 8 | 1 |
| -5.3E+18 | IsMasterProtein | A0A8C5AIN3 | Phosphoinositide phospholipase C OS=Gadus morhua OX=8049 PE=4 SV=1                                    | 4  | 2 | 2 | 2 | 1023 | 116.9 | 6.89 | 5.43  | 2 | 1 |
| -5.3E+18 | IsMasterProtein | A0A8C5BX45 | Solute carrier family 17 member 8 OS=Gadus morhua OX=8049 GN=slc17a8<br>PE=4 SV=1                     | 3  | 2 | 2 | 2 | 560  | 61.5  | 6.79 | 4.63  | 2 | 1 |
| -5.3E+18 | IsMasterProtein | A0A8C4ZQW0 | Ferritin OS=Gadus morhua OX=8049 GN=fth1a PE=3 SV=1                                                   | 12 | 2 | 2 | 2 | 177  | 20.6  | 5.92 | 5.1   | 2 | 1 |
| -5.3E+18 | IsMasterProtein | A0A8C5CG47 | Kelch domain containing 8A OS=Gadus morhua OX=8049 GN=klhdc8a PE=4<br>SV=1                            | 6  | 2 | 2 | 2 | 390  | 42.2  | 9.32 | 5.24  | 2 | 1 |
| -5.3E+18 | IsMasterProtein | A0A8C5CC82 | Arginyl-tRNA--protein transferase 1 OS=Gadus morhua OX=8049 GN=ATE1<br>PE=3 SV=1                      | 10 | 2 | 2 | 2 | 447  | 49.9  | 8.66 | 6.08  | 2 | 1 |
| -5.3E+18 | IsMasterProtein | A0A8C5FUQ8 | Uncharacterized protein OS=Gadus morhua OX=8049 PE=3 SV=1                                             | 3  | 2 | 3 | 2 | 1300 | 144.9 | 8.24 | 8.04  | 2 | 1 |
| -5.3E+18 | IsMasterProtein | A0A8C5AL10 | Uncharacterized protein OS=Gadus morhua OX=8049 PE=4 SV=1                                             | 8  | 2 | 2 | 2 | 560  | 63.9  | 6.09 | 5.67  | 2 | 1 |
| -5.3E+18 | IsMasterProtein | A0A8C5CGY0 | Si:dkey-260j18.2 OS=Gadus morhua OX=8049 PE=4 SV=1                                                    | 4  | 2 | 2 | 2 | 655  | 71.4  | 6.83 | 4.5   | 2 | 1 |
| -5.3E+18 | IsMasterProtein | A0A8C4ZT25 | 60S acidic ribosomal protein P2 OS=Gadus morhua OX=8049 PE=3 SV=1                                     | 28 | 2 | 2 | 2 | 113  | 11.5  | 4.41 | 6.58  | 2 | 1 |
| -5.3E+18 | IsMasterProtein | A0A8C5AGG1 | Uncharacterized protein OS=Gadus morhua OX=8049 PE=4 SV=1                                             | 4  | 2 | 2 | 2 | 872  | 99.1  | 8.07 | 4.82  | 2 | 1 |
| -5.3E+18 | IsMasterProtein | A0A8C5FU63 | Transcription termination factor, RNA polymerase II OS=Gadus morhua<br>OX=8049 GN=ttf2 PE=4 SV=1      | 3  | 2 | 2 | 2 | 1137 | 124.5 | 8.75 | 5     | 2 | 1 |
| -5.2E+18 | IsMasterProtein | A0A8C5BFD9 | Guanine nucleotide binding protein-like 1 OS=Gadus morhua OX=8049<br>GN=gnl1 PE=4 SV=1                | 4  | 2 | 2 | 2 | 592  | 68    | 6.15 | 4.65  | 2 | 1 |
| -5.2E+18 | IsMasterProtein | A0A8C5A0P4 | Amyloid-beta A4 protein OS=Gadus morhua OX=8049 GN=APP PE=3 SV=1                                      | 5  | 2 | 2 | 2 | 727  | 82.3  | 4.96 | 6.76  | 2 | 1 |
| -5.2E+18 | IsMasterProtein | A0A8C5FPM2 | ArfGAP with SH3 domain, ankyrin repeat and PH domain 3 OS=Gadus<br>morhua OX=8049 GN=asap3 PE=4 SV=1  | 4  | 2 | 2 | 2 | 672  | 76.4  | 7.91 | 4.62  | 2 | 1 |
| -5.2E+18 | IsMasterProtein | A0A8C5AFN6 | IL17_R_N domain-containing protein OS=Gadus morhua OX=8049 PE=4<br>SV=1                               | 15 | 2 | 2 | 2 | 347  | 38.2  | 8.16 | 5.13  | 2 | 1 |
| -5.2E+18 | IsMasterProtein | A0A8C4Z2A7 | Sushi repeat-containing protein SRPX2 OS=Gadus morhua OX=8049<br>GN=srpx2 PE=4 SV=1                   | 6  | 2 | 2 | 2 | 457  | 51.7  | 7.49 | 5.05  | 2 | 1 |
| -5.2E+18 | IsMasterProtein | A0A8C4YZD8 | Myosin binding protein C, slow type OS=Gadus morhua OX=8049 PE=4<br>SV=1                              | 3  | 2 | 2 | 2 | 1134 | 127.6 | 6.44 | 5.15  | 2 | 1 |
| -5.2E+18 | IsMasterProtein | A0A8C5C2W4 | Uncharacterized protein OS=Gadus morhua OX=8049 PE=3 SV=1                                             | 7  | 2 | 2 | 2 | 744  | 83.7  | 6.77 | 5.92  | 2 | 1 |
| -5.2E+18 | IsMasterProtein | A0A8C5F5S7 | RNA helicase OS=Gadus morhua OX=8049 PE=3 SV=1                                                        | 7  | 2 | 2 | 2 | 641  | 72.6  | 9.55 | 5.82  | 2 | 1 |
| -5.2E+18 | IsMasterProtein | A0A8C5BZL6 | Muscle-restricted coiled-coil protein OS=Gadus morhua OX=8049<br>GN=cavin4a PE=3 SV=1                 | 17 | 2 | 2 | 2 | 338  | 37.1  | 5.86 | 5.96  | 2 | 1 |
| -5.2E+18 | IsMasterProtein | A0A8C5APF9 | Phosphate carrier protein, mitochondrial OS=Gadus morhua OX=8049<br>GN=slc25a3b PE=3 SV=1             | 6  | 2 | 2 | 2 | 348  | 38.8  | 8.31 | 5.15  | 2 | 1 |

|          |                 |            |                                                                                                                                     |    |   |   |   |      |       |      |       |   |   |
|----------|-----------------|------------|-------------------------------------------------------------------------------------------------------------------------------------|----|---|---|---|------|-------|------|-------|---|---|
| -5.1E+18 | IsMasterProtein | A0A8C5FH48 | Rho guanine nucleotide exchange factor (GEF) 3, like OS=Gadus morhua OX=8049 GN=arhgef3l PE=4 SV=1                                  | 8  | 2 | 2 | 2 | 519  | 59.3  | 6.76 | 4.94  | 2 | 1 |
| -5.1E+18 | IsMasterProtein | A0A8C5CY96 | E3 SUMO-protein ligase PIAS1-like OS=Gadus morhua OX=8049 GN=LOC115558760 PE=3 SV=1                                                 | 8  | 2 | 2 | 2 | 724  | 77.2  | 7.08 | 6.21  | 2 | 1 |
| -5.1E+18 | IsMasterProtein | A0A8C5BPW2 | Propionate--CoA ligase OS=Gadus morhua OX=8049 PE=3 SV=1                                                                            | 7  | 2 | 3 | 2 | 702  | 78.9  | 7.31 | 8.5   | 2 | 1 |
| -5.1E+18 | IsMasterProtein | A0A8C4ZJH5 | Thyroid hormone receptor interactor 11 OS=Gadus morhua OX=8049 PE=4 SV=1                                                            | 2  | 2 | 2 | 2 | 1933 | 216.8 | 5.02 | 5.4   | 2 | 1 |
| -5.1E+18 | IsMasterProtein | A0A8C4ZX59 | Protocadherin 11 OS=Gadus morhua OX=8049 GN=pedh11 PE=4 SV=1                                                                        | 2  | 2 | 2 | 2 | 1295 | 141.4 | 5.66 | 4.35  | 2 | 1 |
| -5.1E+18 | IsMasterProtein | A0A8C5FP59 | Microtubule associated tumor suppressor 1a OS=Gadus morhua OX=8049 GN=mtus1a PE=3 SV=1                                              | 2  | 2 | 2 | 2 | 1295 | 140   | 8.02 | 4.84  | 2 | 1 |
| -5.1E+18 | IsMasterProtein | A0A8C5A868 | F-box protein 2 OS=Gadus morhua OX=8049 GN=fbxo2 PE=4 SV=1                                                                          | 19 | 2 | 4 | 2 | 177  | 20    | 4.23 | 12.77 | 2 | 1 |
| -5.1E+18 | IsMasterProtein | A0A8C5BVK2 | Extracellular leucine-rich repeat and fibronectin type III domain containing 1a OS=Gadus morhua OX=8049 GN=ELFN1 PE=4 SV=1          | 8  | 2 | 2 | 2 | 784  | 89.1  | 7.25 | 6.38  | 2 | 1 |
| -5.1E+18 | IsMasterProtein | A0A8C4ZIA7 | TBC1 domain family, member 2B OS=Gadus morhua OX=8049 GN=tbc1d2b PE=4 SV=1                                                          | 4  | 2 | 2 | 2 | 1002 | 114   | 6.6  | 5.31  | 2 | 1 |
| -5.1E+18 | IsMasterProtein | A0A8C4ZC54 | Growth hormone releasing hormone receptor b OS=Gadus morhua OX=8049 PE=3 SV=1                                                       | 8  | 2 | 2 | 2 | 408  | 46.1  | 8.1  | 4.81  | 2 | 1 |
| -5E+18   | IsMasterProtein | A0A8C5BMT9 | Serine/threonine-protein kinase PLK OS=Gadus morhua OX=8049 GN=plk2b PE=3 SV=1                                                      | 6  | 2 | 2 | 2 | 625  | 71.7  | 8.46 | 5.03  | 2 | 1 |
| -5E+18   | IsMasterProtein | A0A8C4YYV6 | Uncharacterized protein OS=Gadus morhua OX=8049 PE=4 SV=1                                                                           | 3  | 2 | 2 | 2 | 614  | 62.8  | 6.42 | 4.62  | 2 | 1 |
| -5E+18   | IsMasterProtein | A0A8C4ZW6  | Prostaglandin E synthase 2 OS=Gadus morhua OX=8049 GN=ptgesl PE=3 SV=1                                                              | 10 | 2 | 2 | 2 | 398  | 44.6  | 9.26 | 5.4   | 2 | 1 |
| -5E+18   | IsMasterProtein | A0A8C5CQE2 | Uncharacterized protein OS=Gadus morhua OX=8049 PE=4 SV=1                                                                           | 3  | 2 | 2 | 2 | 1449 | 164.3 | 7.66 | 5.29  | 2 | 1 |
| -5E+18   | IsMasterProtein | A0A8C4ZDZ6 | Translocase of outer mitochondrial membrane 34 OS=Gadus morhua OX=8049 PE=4 SV=1                                                    | 8  | 2 | 2 | 2 | 305  | 34.6  | 9.1  | 4.81  | 2 | 1 |
| -5E+18   | IsMasterProtein | A0A8C4ZL50 | Superoxide dismutase [Cu-Zn] OS=Gadus morhua OX=8049 GN=sod1 PE=3 SV=1                                                              | 38 | 5 | 5 | 2 | 154  | 15.8  | 6.51 | 14.4  | 5 | 1 |
| -5E+18   | IsMasterProtein | A0A8C5C1B6 | PMS1 homolog 1, mismatch repair system component OS=Gadus morhua OX=8049 GN=pms1 PE=3 SV=1                                          | 3  | 2 | 2 | 2 | 929  | 100.4 | 8.29 | 4.27  | 2 | 1 |
| -5E+18   | IsMasterProtein | A0A8C5AGC0 | Protein kinase C OS=Gadus morhua OX=8049 GN=si:ch73-374124.1 PE=3 SV=1                                                              | 7  | 2 | 2 | 2 | 669  | 76.7  | 7.87 | 6.77  | 2 | 1 |
| -5E+18   | IsMasterProtein | A0A8C5BBU0 | Fibrillin 2b OS=Gadus morhua OX=8049 PE=3 SV=1                                                                                      | 2  | 4 | 4 | 2 | 2670 | 288.5 | 4.87 | 10.86 | 4 | 1 |
| -4.9E+18 | IsMasterProtein | A0A8C5C5C7 | Neuregulin 2a OS=Gadus morhua OX=8049 GN=nrg2a PE=3 SV=1                                                                            | 5  | 2 | 2 | 2 | 642  | 70.1  | 9.29 | 4.7   | 2 | 1 |
| -4.9E+18 | IsMasterProtein | A0A8C5ACT5 | FH2 domain-containing protein OS=Gadus morhua OX=8049 PE=4 SV=1                                                                     | 1  | 2 | 3 | 2 | 1357 | 146.4 | 7.77 | 7.15  | 2 | 1 |
| -4.9E+18 | IsMasterProtein | A0A8C4ZUJ8 | Uncharacterized protein OS=Gadus morhua OX=8049 PE=4 SV=1                                                                           | 2  | 2 | 2 | 2 | 966  | 108.4 | 6.99 | 5.3   | 2 | 1 |
| -4.9E+18 | IsMasterProtein | A0A8C5CPA0 | Syntaxin 3A OS=Gadus morhua OX=8049 GN=stx3a PE=3 SV=1                                                                              | 15 | 2 | 2 | 2 | 287  | 32.5  | 5.21 | 4.83  | 2 | 1 |
| -4.9E+18 | IsMasterProtein | A0A8C5BVK0 | Homeobox protein OS=Gadus morhua OX=8049 GN=pitx2 PE=3 SV=1                                                                         | 18 | 2 | 2 | 2 | 307  | 33.8  | 9.58 | 5.51  | 2 | 1 |
| -4.9E+18 | IsMasterProtein | A0A8C4ZS15 | Serum amyloid A-like 1 OS=Gadus morhua OX=8049 GN=saal1 PE=4 SV=1                                                                   | 11 | 2 | 4 | 2 | 497  | 54.9  | 4.46 | 8.01  | 2 | 1 |
| -4.9E+18 | IsMasterProtein | A0A8C5AFB5 | Laminin, gamma 3 OS=Gadus morhua OX=8049 GN=lamc3 PE=4 SV=1                                                                         | 3  | 2 | 2 | 2 | 1636 | 177.7 | 6.47 | 5.63  | 2 | 1 |
| -4.8E+18 | IsMasterProtein | A0A8C5CPK6 | Pinin OS=Gadus morhua OX=8049 GN=pnn PE=3 SV=1                                                                                      | 2  | 2 | 2 | 2 | 606  | 66.6  | 9.8  | 4.64  | 2 | 1 |
| -4.8E+18 | IsMasterProtein | A0A8C5FPS0 | SRSF protein kinase 1b OS=Gadus morhua OX=8049 GN=srp1b PE=4 SV=1                                                                   | 6  | 2 | 4 | 2 | 637  | 71.6  | 5.2  | 8.68  | 2 | 1 |
| -4.8E+18 | IsMasterProtein | A0A8C5FFD8 | Ig-like domain-containing protein OS=Gadus morhua OX=8049 PE=4 SV=1                                                                 | 34 | 3 | 3 | 2 | 118  | 12.3  | 7.08 | 9.71  | 3 | 1 |
| -4.8E+18 | IsMasterProtein | A0A8C4ZK40 | Eukaryotic translation elongation factor 1 delta b (guanine nucleotide exchange protein) OS=Gadus morhua OX=8049 GN=EEF1D PE=3 SV=1 | 11 | 2 | 4 | 2 | 272  | 30    | 4.63 | 16.8  | 2 | 1 |
| -4.8E+18 | IsMasterProtein | A0A8C4ZKV1 | Family with sequence similarity 214 member A OS=Gadus morhua OX=8049 GN=fam214a PE=3 SV=1                                           | 6  | 2 | 2 | 2 | 834  | 91.3  | 8.41 | 6.3   | 2 | 1 |
| -4.8E+18 | IsMasterProtein | A0A8C4YXE1 | Calumenin a OS=Gadus morhua OX=8049 GN=calua PE=3 SV=1                                                                              | 11 | 2 | 2 | 2 | 315  | 37.1  | 4.72 | 6.58  | 2 | 1 |
| -4.8E+18 | IsMasterProtein | A0A8C5BLV9 | Mitochondrial ribosomal protein S28 OS=Gadus morhua OX=8049 PE=4 SV=1                                                               | 26 | 2 | 2 | 2 | 137  | 15.2  | 9    | 5.15  | 2 | 1 |
| -4.8E+18 | IsMasterProtein | A0A8C4ZPL4 | ErbB2 interacting protein OS=Gadus morhua OX=8049 GN=erbin PE=4 SV=1                                                                | 4  | 2 | 2 | 2 | 1361 | 149.3 | 5.35 | 5.54  | 2 | 1 |
| -4.7E+18 | IsMasterProtein | A0A8C5BFT1 | Dynamin-binding protein OS=Gadus morhua OX=8049 GN=dnmbp PE=4 SV=1                                                                  | 3  | 2 | 3 | 2 | 1812 | 201.5 | 5.17 | 7.93  | 2 | 1 |
| -4.7E+18 | IsMasterProtein | A0A8C5AJ88 | Uncharacterized protein OS=Gadus morhua OX=8049 PE=4 SV=1                                                                           | 6  | 5 | 5 | 2 | 1124 | 125.2 | 8.22 | 12.84 | 5 | 1 |
| -4.7E+18 | IsMasterProtein | A0A8C5B8Q1 | RNA helicase OS=Gadus morhua OX=8049 GN=dhx16 PE=4 SV=1                                                                             | 2  | 2 | 2 | 2 | 1046 | 120.2 | 6.23 | 4.07  | 2 | 1 |

|          |                 |            |                                                                                                                        |    |    |    |   |      |       |       |        |    |   |
|----------|-----------------|------------|------------------------------------------------------------------------------------------------------------------------|----|----|----|---|------|-------|-------|--------|----|---|
| -4.7E+18 | IsMasterProtein | A0A8C4ZAM8 | Uncharacterized protein OS=Gadus morhua OX=8049 PE=4 SV=1                                                              | 4  | 2  | 5  | 2 | 1195 | 130.7 | 6.25  | 13.06  | 2  | 1 |
| -4.7E+18 | IsMasterProtein | A0A8C5AW40 | Villin-like OS=Gadus morhua OX=8049 GN=vill PE=4 SV=1                                                                  | 5  | 2  | 2  | 2 | 765  | 85.1  | 6.15  | 6.44   | 2  | 1 |
| -4.7E+18 | IsMasterProtein | A0A8C5BQ70 | Solute carrier family 5 member 8 OS=Gadus morhua OX=8049 PE=3 SV=1                                                     | 5  | 2  | 3  | 2 | 596  | 63.7  | 7.66  | 10.79  | 2  | 1 |
| -4.7E+18 | IsMasterProtein | A0A8C4Z3B6 | Cytoplasmic FMR1-interacting protein OS=Gadus morhua OX=8049 PE=3 SV=1                                                 | 2  | 2  | 2  | 2 | 1263 | 146.5 | 7.09  | 4.59   | 2  | 1 |
| -4.7E+18 | IsMasterProtein | A0A8C4Z3G5 | 60S ribosomal protein L27a OS=Gadus morhua OX=8049 GN=rpl27a PE=3 SV=1                                                 | 28 | 2  | 2  | 2 | 148  | 16.6  | 10.58 | 5.18   | 2  | 1 |
| -4.7E+18 | IsMasterProtein | A0A8C5A102 | Protein phosphatase 1, regulatory subunit 26 OS=Gadus morhua OX=8049 GN=ppp1r26 PE=4 SV=1                              | 4  | 2  | 3  | 2 | 1068 | 116.8 | 8.37  | 8.64   | 2  | 1 |
| -4.7E+18 | IsMasterProtein | A0A8C4YYK3 | TAO kinase 2a OS=Gadus morhua OX=8049 GN=taok2a PE=4 SV=1                                                              | 1  | 2  | 2  | 2 | 1153 | 131.6 | 7.87  | 4.2    | 2  | 1 |
| -4.7E+18 | IsMasterProtein | A0A8C5CQT2 | Receptor tyrosine kinase-like orphan receptor 1 OS=Gadus morhua OX=8049 PE=3 SV=1                                      | 3  | 2  | 2  | 2 | 927  | 102.4 | 7.08  | 4.95   | 2  | 1 |
| -4.7E+18 | IsMasterProtein | A0A8C5C2X4 | Bone morphogenetic protein 7b OS=Gadus morhua OX=8049 GN=bmp7b PE=3 SV=1                                               | 6  | 2  | 2  | 2 | 417  | 47.7  | 7.01  | 5.15   | 2  | 1 |
| -4.7E+18 | IsMasterProtein | A0A8C5AE25 | RAB11 family interacting protein 1 (class I) b OS=Gadus morhua OX=8049 GN=rab11fip1b PE=4 SV=1                         | 1  | 2  | 2  | 2 | 1347 | 156.6 | 5.22  | 4.71   | 2  | 1 |
| -4.6E+18 | IsMasterProtein | A0A8C5CR09 | Hes related family bHLH transcription factor with YRPW motif like OS=Gadus morhua OX=8049 GN=hey1 PE=4 SV=1            | 10 | 2  | 2  | 2 | 355  | 37.8  | 9.39  | 5.28   | 2  | 1 |
| -4.6E+18 | IsMasterProtein | A0A8C5FC31 | N-acetylglucosamine-1-phosphate transferase subunit gamma OS=Gadus morhua OX=8049 PE=4 SV=1                            | 19 | 2  | 2  | 2 | 236  | 26.6  | 6.51  | 5.69   | 2  | 1 |
| -4.6E+18 | IsMasterProtein | A0A8C5CWH5 | Uncharacterized protein OS=Gadus morhua OX=8049 PE=4 SV=1                                                              | 11 | 2  | 2  | 2 | 270  | 31.8  | 6.95  | 5.24   | 2  | 1 |
| -4.6E+18 | IsMasterProtein | A0A8C5CMR3 | SCAN box domain-containing protein OS=Gadus morhua OX=8049 PE=4 SV=1                                                   | 6  | 2  | 2  | 2 | 662  | 72.7  | 6.09  | 5.43   | 2  | 1 |
| -4.6E+18 | IsMasterProtein | A0A8C5FH96 | Lemur tyrosine kinase 3 OS=Gadus morhua OX=8049 GN=si:dkey-40m6.8 PE=4 SV=1                                            | 1  | 2  | 2  | 2 | 2767 | 306.1 | 4.83  | 4.25   | 2  | 1 |
| -4.6E+18 | IsMasterProtein | A0A8C4ZVR1 | Forkhead box protein Q1-like OS=Gadus morhua OX=8049 GN=LOC115548435 PE=4 SV=1                                         | 12 | 2  | 3  | 2 | 270  | 30.7  | 9.19  | 7.99   | 2  | 1 |
| -4.6E+18 | IsMasterProtein | A0A8C4ZHT7 | Solute carrier family 8 member 3 OS=Gadus morhua OX=8049 PE=3 SV=1                                                     | 8  | 2  | 2  | 2 | 599  | 66.5  | 5.48  | 5.35   | 2  | 1 |
| -4.6E+18 | IsMasterProtein | A0A8C4YZ06 | Eukaryotic translation initiation factor 2 subunit 1 OS=Gadus morhua OX=8049 GN=eif2s1b PE=3 SV=1                      | 6  | 2  | 2  | 2 | 315  | 36    | 5.03  | 5.63   | 2  | 1 |
| -4.5E+18 | IsMasterProtein | A0A8C4Z2D7 | Uncharacterized protein OS=Gadus morhua OX=8049 PE=4 SV=1                                                              | 2  | 2  | 2  | 2 | 2527 | 274.7 | 6.58  | 4.99   | 2  | 1 |
| -4.5E+18 | IsMasterProtein | A0A8C4ZZL9 | Prostaglandin reductase 1 OS=Gadus morhua OX=8049 GN=ptgr1 PE=3 SV=1                                                   | 11 | 2  | 2  | 2 | 329  | 35.9  | 6.35  | 5.68   | 2  | 1 |
| -4.5E+18 | IsMasterProtein | A0A8C5C5R6 | Zinc finger protein 513a OS=Gadus morhua OX=8049 GN=znf513a PE=4 SV=1                                                  | 10 | 2  | 4  | 2 | 691  | 74    | 7.99  | 10.82  | 2  | 1 |
| -4.5E+18 | IsMasterProtein | A0A8C4ZFQ7 | Leucine-rich repeats and transmembrane domains 2a OS=Gadus morhua OX=8049 PE=4 SV=1                                    | 14 | 2  | 2  | 2 | 354  | 38.2  | 5.22  | 5.63   | 2  | 1 |
| -4.5E+18 | IsMasterProtein | A0A8C5ARF7 | Galactokinase 2 OS=Gadus morhua OX=8049 GN=galk2 PE=3 SV=1                                                             | 7  | 2  | 2  | 2 | 442  | 48    | 5.83  | 5.21   | 2  | 1 |
| -4.5E+18 | IsMasterProtein | A0A8C4ZR57 | Retinol saturase (all-trans-retinol 13,14-reductase) OS=Gadus morhua OX=8049 PE=4 SV=1                                 | 5  | 2  | 2  | 2 | 611  | 68.1  | 8.24  | 6.54   | 2  | 1 |
| -4.5E+18 | IsMasterProtein | C8YNQ4     | Hemoglobin beta 1 OS=Gadus morhua OX=8049 GN=HbB1 PE=3 SV=1                                                            | 81 | 12 | 40 | 2 | 147  | 16.3  | 7.43  | 123.43 | 12 | 1 |
| -4.4E+18 | IsMasterProtein | A0A8C4Z706 | Peptidyl-prolyl cis-trans isomerase OS=Gadus morhua OX=8049 GN=pin1 PE=4 SV=1                                          | 28 | 2  | 2  | 2 | 157  | 17.5  | 6.55  | 7.15   | 2  | 1 |
| -4.4E+18 | IsMasterProtein | A0A8C4ZBH5 | Uncharacterized protein OS=Gadus morhua OX=8049 PE=3 SV=1                                                              | 52 | 16 | 27 | 2 | 376  | 41.9  | 5.71  | 86.14  | 16 | 1 |
| -4.4E+18 | IsMasterProtein | A0A8C5BEC1 | Phosphatidylserine synthase OS=Gadus morhua OX=8049 GN=ptdss1a PE=3 SV=1                                               | 8  | 2  | 2  | 2 | 508  | 59.3  | 7.94  | 5.11   | 2  | 1 |
| -4.4E+18 | IsMasterProtein | A0A8C4ZL36 | Immunoglobulin like and fibronectin type III domain containing 1, tandem duplicate 2 OS=Gadus morhua OX=8049 PE=4 SV=1 | 4  | 2  | 2  | 2 | 1198 | 132.3 | 7.93  | 5.96   | 2  | 1 |
| -4.4E+18 | IsMasterProtein | A0A8C5A3D3 | Protein kinase C OS=Gadus morhua OX=8049 GN=pkn3 PE=3 SV=1                                                             | 4  | 2  | 2  | 2 | 929  | 105   | 7.75  | 4.7    | 2  | 1 |
| -4.4E+18 | IsMasterProtein | A0A8C5C3N2 | Zinc finger, MIZ-type containing 1a OS=Gadus morhua OX=8049 PE=4 SV=1                                                  | 7  | 2  | 2  | 2 | 987  | 106   | 7.56  | 6.52   | 2  | 1 |
| -4.4E+18 | IsMasterProtein | A0A8C4ZM46 | Basal cell adhesion molecule (Lutheran blood group) OS=Gadus morhua OX=8049 GN=bcam PE=4 SV=1                          | 3  | 2  | 2  | 2 | 548  | 58.4  | 5.16  | 5.43   | 2  | 1 |
| -4.4E+18 | IsMasterProtein | A0A8C5AIE0 | Amidohydro-rel domain-containing protein OS=Gadus morhua OX=8049 PE=3 SV=1                                             | 8  | 2  | 2  | 2 | 662  | 71.6  | 6.54  | 5.45   | 2  | 1 |
| -4.4E+18 | IsMasterProtein | A0A8C4Z8H0 | Dynein, axonemal, heavy chain 2 OS=Gadus morhua OX=8049 PE=3 SV=1                                                      | 1  | 2  | 2  | 2 | 4398 | 498.2 | 6.73  | 5.88   | 2  | 1 |



|          |                 |            |                                                                                                  |    |    |    |   |      |       |       |       |    |   |
|----------|-----------------|------------|--------------------------------------------------------------------------------------------------|----|----|----|---|------|-------|-------|-------|----|---|
| -4.3E+18 | IsMasterProtein | A0A8C4ZGT6 | Uncharacterized LOC115529103 OS=Gadus morhua OX=8049 GN=si:dkey-19b23.7 PE=4 SV=1                | 13 | 2  | 2  | 2 | 303  | 33.6  | 6.87  | 5.53  | 2  | 1 |
| -4.3E+18 | IsMasterProtein | A0A8C5CAX7 | Ribosomal protein L19 OS=Gadus morhua OX=8049 PE=3 SV=1                                          | 9  | 2  | 2  | 2 | 199  | 23.8  | 11.34 | 4.61  | 2  | 1 |
| -4.3E+18 | IsMasterProtein | A0A8C5ARU5 | Sidoreflexin OS=Gadus morhua OX=8049 GN=sfxn3 PE=3 SV=1                                          | 12 | 2  | 3  | 2 | 316  | 34.9  | 9.07  | 6.14  | 2  | 1 |
| -4.3E+18 | IsMasterProtein | A0A8C4Z6J3 | Microtubule associated protein 1 OS=Gadus morhua OX=8049 PE=4 SV=1                               | 6  | 2  | 2  | 2 | 553  | 60.5  | 8.78  | 4.81  | 2  | 1 |
| -4.3E+18 | IsMasterProtein | A0A8C4Z6X9 | Tumor protein, translationally-controlled 1 OS=Gadus morhua OX=8049 GN=tp1 PE=3 SV=1             | 13 | 2  | 2  | 2 | 171  | 19.5  | 4.7   | 5.11  | 2  | 1 |
| -4.3E+18 | IsMasterProtein | A0A8C5BJ68 | Myosin motor domain-containing protein OS=Gadus morhua OX=8049 PE=3 SV=1                         | 8  | 3  | 3  | 2 | 652  | 75.3  | 9.16  | 7.7   | 3  | 1 |
| -4.3E+18 | IsMasterProtein | A0A8C5CXZ9 | Tyrosine-protein kinase OS=Gadus morhua OX=8049 GN=fer PE=3 SV=1                                 | 6  | 2  | 2  | 2 | 868  | 97.6  | 7.24  | 6.6   | 2  | 1 |
| -4.3E+18 | IsMasterProtein | A0A8C5F3F5 | Forkhead box D1 OS=Gadus morhua OX=8049 GN=foxd1 PE=4 SV=1                                       | 12 | 2  | 2  | 2 | 359  | 39.3  | 8.09  | 5.08  | 2  | 1 |
| -4.2E+18 | IsMasterProtein | A0A8C5F822 | Uncharacterized protein OS=Gadus morhua OX=8049 PE=4 SV=1                                        | 17 | 2  | 2  | 2 | 236  | 25.5  | 6.4   | 5.17  | 2  | 1 |
| -4.2E+18 | IsMasterProtein | A0A8C5B3V0 | Uncharacterized LOC115545538 OS=Gadus morhua OX=8049 GN=LOC115545538 PE=4 SV=1                   | 51 | 5  | 8  | 2 | 152  | 16.7  | 7.58  | 24.27 | 5  | 1 |
| -4.2E+18 | IsMasterProtein | A0A8C4ZDP8 | Nipped-B protein OS=Gadus morhua OX=8049 PE=3 SV=1                                               | 1  | 2  | 3  | 2 | 2321 | 260.6 | 7.81  | 8.41  | 2  | 1 |
| -4.2E+18 | IsMasterProtein | A0A8C5FJ67 | HATPase_c domain-containing protein OS=Gadus morhua OX=8049 PE=3 SV=1                            | 10 | 9  | 12 | 2 | 810  | 93.6  | 4.91  | 33.62 | 9  | 1 |
| -4.2E+18 | IsMasterProtein | A0A8C5AFD2 | Synaptosomal-associated protein OS=Gadus morhua OX=8049 PE=3 SV=1                                | 14 | 2  | 2  | 2 | 282  | 31    | 5.6   | 5.58  | 2  | 1 |
| -4.2E+18 | IsMasterProtein | A0A8C5A2T4 | Uncharacterized protein OS=Gadus morhua OX=8049 PE=4 SV=1                                        | 14 | 3  | 3  | 2 | 587  | 64.4  | 5.95  | 8.49  | 3  | 1 |
| -4.2E+18 | IsMasterProtein | A0A8C5CJL8 | Tyrosine-protein kinase receptor OS=Gadus morhua OX=8049 PE=3 SV=1                               | 3  | 2  | 2  | 2 | 820  | 90.7  | 7.11  | 4.79  | 2  | 1 |
| -4.2E+18 | IsMasterProtein | A0A8C5BNQ0 | Glutamate receptor OS=Gadus morhua OX=8049 GN=gria4b PE=3 SV=1                                   | 5  | 2  | 2  | 2 | 904  | 101.1 | 7.78  | 6.06  | 2  | 1 |
| -4.2E+18 | IsMasterProtein | A0A8C4ZAK9 | HMG box domain containing 3 OS=Gadus morhua OX=8049 GN=HMGXB3 PE=4 SV=1                          | 4  | 2  | 2  | 2 | 1323 | 142.1 | 6.35  | 5.83  | 2  | 1 |
| -4.2E+18 | IsMasterProtein | A0A8C4ZWH4 | Integrator complex subunit 10 OS=Gadus morhua OX=8049 PE=3 SV=1                                  | 8  | 2  | 2  | 2 | 647  | 73.1  | 7.08  | 5.7   | 2  | 1 |
| -4.2E+18 | IsMasterProtein | A0A8C5FJ12 | TAR DNA-binding protein 43 OS=Gadus morhua OX=8049 GN=tardbpl PE=4 SV=1                          | 13 | 4  | 4  | 2 | 307  | 34.6  | 6.28  | 10.13 | 4  | 1 |
| -4.2E+18 | IsMasterProtein | A0A8C4Z8Y0 | Beta-2-glycoprotein 1 OS=Gadus morhua OX=8049 GN=LOC115540415 PE=4 SV=1                          | 42 | 11 | 15 | 2 | 363  | 39.4  | 7.78  | 44.17 | 11 | 1 |
| -4.2E+18 | IsMasterProtein | A0A8C5BE81 | Fatty acid-binding protein, heart-like OS=Gadus morhua OX=8049 GN=LOC115535843 PE=3 SV=1         | 29 | 2  | 2  | 2 | 132  | 14.8  | 6.68  | 5.19  | 2  | 1 |
| -4.2E+18 | IsMasterProtein | A0A8C4YU02 | Protein serine kinase H1 OS=Gadus morhua OX=8049 GN=pskh1 PE=3 SV=1                              | 9  | 2  | 3  | 2 | 430  | 48.4  | 9.64  | 8.79  | 2  | 1 |
| -4.2E+18 | IsMasterProtein | A0A8C5CT19 | AFG3-like protein 1 OS=Gadus morhua OX=8049 GN=si:ch1073-174d20.2 PE=3 SV=1                      | 5  | 2  | 3  | 2 | 783  | 85.5  | 6.83  | 5.66  | 2  | 1 |
| -4.1E+18 | IsMasterProtein | A0A8C5B7V8 | Myosin phosphatase Rho interacting protein OS=Gadus morhua OX=8049 GN=si:ch73-103b11.2 PE=4 SV=1 | 1  | 2  | 2  | 2 | 2347 | 263.7 | 5.8   | 4.74  | 2  | 1 |
| -4.1E+18 | IsMasterProtein | A0A8C5AWJ5 | Non-specific serine/threonine protein kinase OS=Gadus morhua OX=8049 PE=3 SV=1                   | 1  | 2  | 2  | 2 | 2835 | 317   | 7.18  | 5.09  | 2  | 1 |
| -4.1E+18 | IsMasterProtein | A0A8C5BH50 | SUN domain-containing protein OS=Gadus morhua OX=8049 PE=4 SV=1                                  | 5  | 2  | 2  | 2 | 890  | 98.3  | 5.12  | 5.56  | 2  | 1 |
| -4.1E+18 | IsMasterProtein | A0A8C5FLA0 | Small nuclear ribonucleoprotein Sm D3 OS=Gadus morhua OX=8049 GN=snrpd3l PE=3 SV=1               | 17 | 2  | 2  | 2 | 181  | 20.2  | 9.54  | 5.38  | 2  | 1 |
| -4.1E+18 | IsMasterProtein | A0A8C5A1U5 | Proteasome subunit alpha type OS=Gadus morhua OX=8049 GN=psma1 PE=3 SV=1                         | 8  | 2  | 2  | 2 | 293  | 32.5  | 7.05  | 5.83  | 2  | 1 |
| -4.1E+18 | IsMasterProtein | A0A8C5BER0 | MI domain-containing protein OS=Gadus morhua OX=8049 PE=4 SV=1                                   | 3  | 2  | 2  | 2 | 1024 | 115.8 | 8.06  | 4.73  | 2  | 1 |
| -4.1E+18 | IsMasterProtein | A0A8C5FA42 | Tubulin alpha chain OS=Gadus morhua OX=8049 PE=3 SV=1                                            | 11 | 5  | 23 | 2 | 434  | 48.7  | 5.03  | 69.36 | 5  | 1 |
| -4E+18   | IsMasterProtein | A0A8C4ZYU4 | Chitinase OS=Gadus morhua OX=8049 GN=LOC115546646 PE=3 SV=1                                      | 16 | 4  | 4  | 2 | 481  | 52.8  | 6.67  | 13.7  | 4  | 1 |
| -4E+18   | IsMasterProtein | A0A8C5A363 | Formin homology 2 domain containing 3b OS=Gadus morhua OX=8049 PE=4 SV=1                         | 4  | 3  | 4  | 2 | 1726 | 190.5 | 5.14  | 11.95 | 3  | 1 |
| -4E+18   | IsMasterProtein | A0A8C5A616 | Kyphoscoliosis peptidase OS=Gadus morhua OX=8049 PE=4 SV=1                                       | 11 | 2  | 2  | 2 | 532  | 59.1  | 6.27  | 5.49  | 2  | 1 |
| -4E+18   | IsMasterProtein | A0A8C5AP04 | Uncharacterized LOC115560263 OS=Gadus morhua OX=8049 GN=LOC115560263 PE=4 SV=1                   | 5  | 2  | 3  | 2 | 469  | 52.2  | 8.18  | 8.72  | 2  | 1 |
| -4E+18   | IsMasterProtein | A0A8C5CN71 | Phosphodiesterase OS=Gadus morhua OX=8049 GN=PDE4B PE=3 SV=1                                     | 6  | 2  | 2  | 2 | 728  | 81.3  | 4.87  | 6.51  | 2  | 1 |
| -4E+18   | IsMasterProtein | A0A8C5BXH3 | Calpain 15 OS=Gadus morhua OX=8049 GN=capn15 PE=3 SV=1                                           | 5  | 2  | 2  | 2 | 1245 | 133.1 | 7.93  | 5.24  | 2  | 1 |
| -4E+18   | IsMasterProtein | A0A8C5CD81 | N-acetylglucosamine-6-sulfatase OS=Gadus morhua OX=8049 GN=gnsb PE=3 SV=1                        | 9  | 3  | 3  | 2 | 516  | 57.1  | 6.92  | 10.17 | 3  | 1 |

|          |                 |            |                                                                                                                                           |    |    |    |   |      |       |       |       |    |   |
|----------|-----------------|------------|-------------------------------------------------------------------------------------------------------------------------------------------|----|----|----|---|------|-------|-------|-------|----|---|
| -4E+18   | IsMasterProtein | A0A8C5FF51 | Titin homolog OS=Gadus morhua OX=8049 GN=si:ch73-138n13.1 PE=4 SV=1                                                                       | 4  | 3  | 3  | 2 | 1802 | 205.6 | 8.97  | 6.66  | 3  | 1 |
| -4E+18   | IsMasterProtein | A0A8C4Z7C2 | Uncharacterized protein OS=Gadus morhua OX=8049 PE=4 SV=1                                                                                 | 8  | 2  | 2  | 2 | 362  | 39.1  | 6.02  | 6.06  | 2  | 1 |
| -3.9E+18 | IsMasterProtein | A0A8C4ZGP6 | Serine/threonine-protein phosphatase OS=Gadus morhua OX=8049 GN=PPP6C PE=3 SV=1                                                           | 12 | 2  | 2  | 2 | 306  | 35.2  | 5.69  | 4.83  | 2  | 1 |
| -3.9E+18 | IsMasterProtein | A0A8C5AZK9 | Beta-galactosidase OS=Gadus morhua OX=8049 GN=glb11 PE=3 SV=1                                                                             | 5  | 2  | 2  | 2 | 673  | 75.6  | 7.12  | 6.24  | 2  | 1 |
| -3.9E+18 | IsMasterProtein | A0A8C5FJ13 | Actin, beta 1 OS=Gadus morhua OX=8049 PE=3 SV=1                                                                                           | 53 | 16 | 24 | 2 | 364  | 40.8  | 5.49  | 70.92 | 16 | 1 |
| -3.9E+18 | IsMasterProtein | A0A8C5AHN6 | Annexin OS=Gadus morhua OX=8049 GN=ANXA5 PE=3 SV=1                                                                                        | 10 | 2  | 3  | 2 | 321  | 35.8  | 6.3   | 8.92  | 2  | 1 |
| -3.9E+18 | IsMasterProtein | A0A8C4ZCV5 | Ankyrin repeat domain 33ba OS=Gadus morhua OX=8049 GN=ankrd33ba PE=4 SV=1                                                                 | 5  | 2  | 2  | 2 | 553  | 61.4  | 7.12  | 4.76  | 2  | 1 |
| -3.9E+18 | IsMasterProtein | A0A8C5BSZ7 | Uncharacterized LOC115532067 OS=Gadus morhua OX=8049 GN=LOC115532067 PE=4 SV=1                                                            | 3  | 2  | 2  | 2 | 1747 | 187   | 9.19  | 5.53  | 2  | 1 |
| -3.9E+18 | IsMasterProtein | A0A8C5B6H4 | von Willebrand factor A domain containing 8 OS=Gadus morhua OX=8049 PE=4 SV=1                                                             | 2  | 2  | 2  | 2 | 1780 | 197.1 | 6.84  | 4.8   | 2  | 1 |
| -3.9E+18 | IsMasterProtein | A0A8C5F5C7 | 40S ribosomal protein S15a OS=Gadus morhua OX=8049 PE=3 SV=1                                                                              | 10 | 2  | 2  | 2 | 166  | 19.3  | 10.14 | 4.49  | 2  | 1 |
| -3.9E+18 | IsMasterProtein | A0A8C5BRL3 | Phospholipid-transporting ATPase OS=Gadus morhua OX=8049 PE=3 SV=1                                                                        | 3  | 2  | 3  | 2 | 1107 | 122.4 | 6.02  | 8.68  | 2  | 1 |
| -3.9E+18 | IsMasterProtein | A0A8C5A0W4 | Coiled-coil domain containing 28A OS=Gadus morhua OX=8049 GN=ccdc28a PE=4 SV=1                                                            | 14 | 2  | 2  | 2 | 221  | 24.1  | 9.07  | 4.47  | 2  | 1 |
| -3.8E+18 | IsMasterProtein | A0A8C5C9C5 | Niban apoptosis regulator 2b OS=Gadus morhua OX=8049 PE=3 SV=1                                                                            | 7  | 2  | 3  | 2 | 799  | 90    | 5.72  | 8.83  | 2  | 1 |
| -3.8E+18 | IsMasterProtein | A0A8C4ZDD8 | Tyrosine 3-monooxygenase/tryptophan 5-monooxygenase activation protein, epsilon polypeptide 1 OS=Gadus morhua OX=8049 GN=ywhae1 PE=3 SV=1 | 17 | 5  | 7  | 2 | 301  | 34.3  | 4.97  | 18.61 | 5  | 1 |
| -3.8E+18 | IsMasterProtein | A0A8C4Z0Z3 | Ras association domain family member 4a OS=Gadus morhua OX=8049 PE=4 SV=1                                                                 | 11 | 2  | 5  | 2 | 294  | 34.1  | 6.15  | 11.45 | 2  | 1 |
| -3.8E+18 | IsMasterProtein | A0A8C5F7T1 | Uncharacterized protein OS=Gadus morhua OX=8049 PE=4 SV=1                                                                                 | 6  | 2  | 2  | 2 | 865  | 97    | 8.35  | 5.65  | 2  | 1 |
| -3.8E+18 | IsMasterProtein | A0A8C4ZT35 | Phosphoenolpyruvate carboxykinase (GTP) OS=Gadus morhua OX=8049 GN=pck1 PE=3 SV=1                                                         | 9  | 2  | 2  | 2 | 624  | 68.6  | 6.09  | 6.41  | 2  | 1 |
| -3.8E+18 | IsMasterProtein | A0A8C5B0F4 | Uncharacterized protein OS=Gadus morhua OX=8049 PE=3 SV=1                                                                                 | 3  | 2  | 2  | 2 | 1309 | 141.2 | 6.04  | 6.22  | 2  | 1 |
| -3.8E+18 | IsMasterProtein | A0A8C4ZM01 | Receptor protein-tyrosine kinase OS=Gadus morhua OX=8049 GN=ddr2a PE=4 SV=1                                                               | 4  | 2  | 3  | 2 | 835  | 93.8  | 5.15  | 8.86  | 2  | 1 |
| -3.7E+18 | IsMasterProtein | A0A8C5CK86 | Vesicle-fusing ATPase OS=Gadus morhua OX=8049 PE=3 SV=1                                                                                   | 6  | 2  | 5  | 2 | 779  | 86    | 7.03  | 12.39 | 2  | 1 |
| -3.7E+18 | IsMasterProtein | A0A8C5ANU5 | AP-1 complex subunit mu-1 OS=Gadus morhua OX=8049 GN=LOC115556069 PE=3 SV=1                                                               | 6  | 2  | 2  | 2 | 500  | 57.1  | 8.87  | 4.74  | 2  | 1 |
| -3.7E+18 | IsMasterProtein | A0A8C5BWD6 | Dynein, axonemal, heavy chain 12 OS=Gadus morhua OX=8049 PE=3 SV=1                                                                        | 1  | 2  | 2  | 2 | 3376 | 384.1 | 5.54  | 5.12  | 2  | 1 |
| -3.7E+18 | IsMasterProtein | A0A8C5C283 | Protein phosphatase, Mg2+/Mn2+ dependent, 1G OS=Gadus morhua OX=8049 GN=ppm1g PE=3 SV=1                                                   | 6  | 2  | 2  | 2 | 574  | 61    | 4.48  | 6.1   | 2  | 1 |
| -3.7E+18 | IsMasterProtein | A0A8C5AQM3 | Myoferlin-like OS=Gadus morhua OX=8049 GN=LOC115530669 PE=4 SV=1                                                                          | 2  | 2  | 2  | 2 | 1951 | 222.8 | 7.17  | 6.18  | 2  | 1 |
| -3.6E+18 | IsMasterProtein | A0A8C5AFT7 | Terminal nucleotidyltransferase 2 OS=Gadus morhua OX=8049 PE=4 SV=1                                                                       | 11 | 2  | 2  | 2 | 430  | 48.4  | 9.55  | 5.45  | 2  | 1 |
| -3.6E+18 | IsMasterProtein | A0A8C5B1U8 | Calcium channel, voltage-dependent, alpha 2/delta subunit 4a OS=Gadus morhua OX=8049 PE=3 SV=1                                            | 7  | 2  | 4  | 2 | 937  | 106.7 | 6.71  | 12.25 | 2  | 1 |
| -3.6E+18 | IsMasterProtein | A0A8C5FFU4 | Elastin microfibril interfacer 3a OS=Gadus morhua OX=8049 PE=4 SV=1                                                                       | 4  | 2  | 2  | 2 | 710  | 76.7  | 7.87  | 4.61  | 2  | 1 |
| -3.6E+18 | IsMasterProtein | A0A8C4Z7U2 | Adducin 2 (beta) OS=Gadus morhua OX=8049 GN=add2 PE=3 SV=1                                                                                | 7  | 2  | 2  | 2 | 630  | 69.2  | 7.01  | 5.27  | 2  | 1 |
| -3.6E+18 | IsMasterProtein | A0A8C5C0H0 | Ubiquitin carboxyl-terminal hydrolase 47 OS=Gadus morhua OX=8049 GN=usp47 PE=4 SV=1                                                       | 3  | 2  | 2  | 2 | 1403 | 158.3 | 5.1   | 5.65  | 2  | 1 |
| -3.6E+18 | IsMasterProtein | A0A8C4YWX7 | Nucleoside-diphosphate kinase OS=Gadus morhua OX=8049 GN=LOC115534769 PE=4 SV=1                                                           | 10 | 2  | 2  | 2 | 704  | 79.7  | 5.06  | 6.11  | 2  | 1 |
| -3.6E+18 | IsMasterProtein | A0A8C5ANR0 | Uncharacterized protein OS=Gadus morhua OX=8049 PE=4 SV=1                                                                                 | 3  | 2  | 3  | 2 | 1272 | 143.4 | 7.47  | 7.27  | 2  | 1 |
| -3.6E+18 | IsMasterProtein | A0A8C5AYY1 | Calcium/calmodulin-dependent protein kinase OS=Gadus morhua OX=8049 GN=LOC115540711 PE=3 SV=1                                             | 10 | 3  | 3  | 2 | 575  | 64.3  | 7.97  | 8.78  | 3  | 1 |
| -3.6E+18 | IsMasterProtein | A0A8C5CDS1 | Uncharacterized protein OS=Gadus morhua OX=8049 PE=3 SV=1                                                                                 | 3  | 4  | 4  | 2 | 1935 | 221.3 | 5.94  | 9.45  | 4  | 1 |
| -3.6E+18 | IsMasterProtein | A0A8C5CYN8 | AAA domain-containing protein OS=Gadus morhua OX=8049 PE=3 SV=1                                                                           | 3  | 2  | 2  | 2 | 1999 | 208.9 | 9.47  | 5.35  | 2  | 1 |
| -3.6E+18 | IsMasterProtein | A0A8C5A7T2 | Contactin 3b OS=Gadus morhua OX=8049 PE=4 SV=1                                                                                            | 4  | 2  | 2  | 2 | 985  | 106.9 | 5.5   | 5.98  | 2  | 1 |
| -3.5E+18 | IsMasterProtein | A0A8C5A9Z6 | DNA damage-binding protein 1 OS=Gadus morhua OX=8049 GN=ddb1 PE=3 SV=1                                                                    | 2  | 2  | 2  | 2 | 1094 | 121.2 | 5.49  | 5.07  | 2  | 1 |

|          |                 |            |                                                                                                             |    |   |    |   |      |       |      |       |   |   |
|----------|-----------------|------------|-------------------------------------------------------------------------------------------------------------|----|---|----|---|------|-------|------|-------|---|---|
| -3.5E+18 | IsMasterProtein | A0A8C4ZT67 | Hexosyltransferase OS=Gadus morhua OX=8049 GN=b4galnt3b PE=3 SV=1                                           | 7  | 2 | 2  | 2 | 797  | 90.6  | 8.72 | 5.4   | 2 | 1 |
| -3.5E+18 | IsMasterProtein | A0A8C4ZMR0 | FUS RNA binding protein OS=Gadus morhua OX=8049 PE=3 SV=1                                                   | 14 | 2 | 2  | 2 | 296  | 31    | 8.53 | 4.66  | 2 | 1 |
| -3.5E+18 | IsMasterProtein | A0A8C4ZQL4 | Mannose-1-phosphate guanylyltransferase OS=Gadus morhua OX=8049 PE=3 SV=1                                   | 8  | 2 | 2  | 2 | 366  | 40.7  | 6.24 | 5.22  | 2 | 1 |
| -3.5E+18 | IsMasterProtein | A0A8C5BH66 | 5-methyltetrahydrofolate-homocysteine methyltransferase reductase OS=Gadus morhua OX=8049 GN=mttr PE=4 SV=1 | 6  | 2 | 2  | 2 | 675  | 74.2  | 6.1  | 5.24  | 2 | 1 |
| -3.5E+18 | IsMasterProtein | A0A8C4ZJY6 | Integrin, alpha 1 OS=Gadus morhua OX=8049 GN=itga1 PE=3 SV=1                                                | 3  | 2 | 2  | 2 | 1113 | 122.4 | 6.23 | 4.8   | 2 | 1 |
| -3.5E+18 | IsMasterProtein | A0A8C5BBS7 | Proteasome subunit beta OS=Gadus morhua OX=8049 GN=PSMB7 PE=3 SV=1                                          | 12 | 2 | 2  | 2 | 289  | 31    | 8.09 | 5.96  | 2 | 1 |
| -3.5E+18 | IsMasterProtein | A0A8C5AN02 | Protein pelota homolog OS=Gadus morhua OX=8049 GN=pelo PE=3 SV=1                                            | 8  | 2 | 2  | 2 | 373  | 41.5  | 6.42 | 4.85  | 2 | 1 |
| -3.5E+18 | IsMasterProtein | A0A8C5CFH5 | Ubiquitinyl hydrolase 1 OS=Gadus morhua OX=8049 GN=usp48 PE=4 SV=1                                          | 4  | 2 | 2  | 2 | 1025 | 116.5 | 5.88 | 5.12  | 2 | 1 |
| -3.5E+18 | IsMasterProtein | A0A8C4ZN72 | Protein LSM14 homolog B-like OS=Gadus morhua OX=8049 GN=LSM14B PE=3 SV=1                                    | 6  | 2 | 2  | 2 | 375  | 41.4  | 9.79 | 4.18  | 2 | 1 |
| -3.5E+18 | IsMasterProtein | A0A8C5CS92 | Rap-GAP domain-containing protein OS=Gadus morhua OX=8049 PE=4 SV=1                                         | 3  | 2 | 2  | 2 | 1481 | 164.6 | 7.12 | 4.97  | 2 | 1 |
| -3.5E+18 | IsMasterProtein | A0A8C4ZGS9 | Phosphofurin acidic cluster sorting protein 1 OS=Gadus morhua OX=8049 GN=pacs1 PE=3 SV=1                    | 6  | 2 | 2  | 2 | 907  | 99.8  | 8.05 | 5.56  | 2 | 1 |
| -3.5E+18 | IsMasterProtein | A0A8C5CS01 | Reverse transcriptase domain-containing protein OS=Gadus morhua OX=8049 PE=4 SV=1                           | 5  | 2 | 2  | 2 | 584  | 65.4  | 8.97 | 4.72  | 2 | 1 |
| -3.5E+18 | IsMasterProtein | A0A8C5BGC5 | Stabilin 1 OS=Gadus morhua OX=8049 GN=stab1 PE=4 SV=1                                                       | 1  | 2 | 13 | 2 | 1949 | 211.2 | 7.11 | 30.25 | 2 | 1 |
| -3.4E+18 | IsMasterProtein | A0A8C5BPS8 | Protein PALS1 OS=Gadus morhua OX=8049 GN=gphna PE=3 SV=1                                                    | 7  | 2 | 2  | 2 | 696  | 78.3  | 6.54 | 5.86  | 2 | 1 |
| -3.4E+18 | IsMasterProtein | A0A8C4ZE35 | Uncharacterized protein OS=Gadus morhua OX=8049 PE=3 SV=1                                                   | 5  | 2 | 2  | 2 | 487  | 53.9  | 6.98 | 5.38  | 2 | 1 |
| -3.4E+18 | IsMasterProtein | A0A8C4Z150 | Uncharacterized protein OS=Gadus morhua OX=8049 PE=4 SV=1                                                   | 17 | 2 | 2  | 2 | 341  | 38.5  | 6.62 | 5.84  | 2 | 1 |
| -3.4E+18 | IsMasterProtein | A0A8C5C1R6 | Mitogen-activated protein kinase kinase kinase 4 OS=Gadus morhua OX=8049 PE=4 SV=1                          | 4  | 2 | 2  | 2 | 1186 | 135.3 | 7.68 | 4.78  | 2 | 1 |
| -3.4E+18 | IsMasterProtein | A0A8C5C3R7 | Sodium channel protein OS=Gadus morhua OX=8049 GN=LOC115537029 PE=3 SV=1                                    | 2  | 2 | 2  | 2 | 1645 | 186.6 | 7.2  | 4.61  | 2 | 1 |
| -3.3E+18 | IsMasterProtein | A0A8C5FV19 | Ras-related protein Rab-11B-like OS=Gadus morhua OX=8049 GN=LOC115555445 PE=4 SV=1                          | 30 | 5 | 5  | 2 | 218  | 24.5  | 5.88 | 12.03 | 5 | 1 |
| -3.3E+18 | IsMasterProtein | A0A8C5FIZ6 | GATA-type domain-containing protein OS=Gadus morhua OX=8049 PE=4 SV=1                                       | 4  | 2 | 4  | 2 | 1178 | 128.9 | 8.19 | 11.08 | 2 | 1 |
| -3.3E+18 | IsMasterProtein | A0A8C4ZPM9 | Ankyrin repeat and sterile alpha motif domain containing 3 OS=Gadus morhua OX=8049 PE=4 SV=1                | 8  | 2 | 2  | 2 | 631  | 67.7  | 6.14 | 5.42  | 2 | 1 |
| -3.3E+18 | IsMasterProtein | A0A8C5B6G8 | Kin of IRRE-like protein 1 OS=Gadus morhua OX=8049 GN=LOC115529991 PE=4 SV=1                                | 6  | 2 | 2  | 2 | 1011 | 104.3 | 6.65 | 6.44  | 2 | 1 |
| -3.3E+18 | IsMasterProtein | A0A8C4ZXF6 | Phospholipase D family, member 7 OS=Gadus morhua OX=8049 GN=pld7 PE=3 SV=1                                  | 5  | 2 | 3  | 2 | 844  | 91    | 5.68 | 7.98  | 2 | 1 |
| -3.2E+18 | IsMasterProtein | A0A8C4Z918 | Cytochrome c-1 OS=Gadus morhua OX=8049 PE=3 SV=1                                                            | 9  | 2 | 3  | 2 | 299  | 33.2  | 7.46 | 8.76  | 2 | 1 |
| -3.2E+18 | IsMasterProtein | A0A8C5B600 | CAF-1_p60_C domain-containing protein OS=Gadus morhua OX=8049 PE=4 SV=1                                     | 7  | 2 | 2  | 2 | 570  | 61.3  | 8.91 | 6.11  | 2 | 1 |
| -3.2E+18 | IsMasterProtein | A0A8C5BJQ6 | Alpha-1,4 glucan phosphorylase OS=Gadus morhua OX=8049 GN=pygma PE=3 SV=1                                   | 4  | 3 | 3  | 2 | 857  | 98.5  | 7.01 | 6.56  | 3 | 1 |
| -3.2E+18 | IsMasterProtein | A0A8C5D1I5 | Cilia- and flagella-associated protein 91 OS=Gadus morhua OX=8049 PE=3 SV=1                                 | 5  | 2 | 2  | 2 | 686  | 77.7  | 7.42 | 4.84  | 2 | 1 |
| -3.2E+18 | IsMasterProtein | A0A8C5CHJ5 | Receptor protein serine/threonine kinase OS=Gadus morhua OX=8049 GN=BMPR2 PE=3 SV=1                         | 6  | 2 | 2  | 2 | 1001 | 108.1 | 6.58 | 5.65  | 2 | 1 |
| -3.2E+18 | IsMasterProtein | A0A8C4ZU95 | Uncharacterized protein OS=Gadus morhua OX=8049 PE=3 SV=1                                                   | 6  | 3 | 3  | 2 | 820  | 91.5  | 6.99 | 9.73  | 3 | 1 |
| -3.2E+18 | IsMasterProtein | A0A8C5BXC8 | Netrin receptor UNC5 OS=Gadus morhua OX=8049 GN=LOC115541952 PE=3 SV=1                                      | 6  | 2 | 2  | 2 | 900  | 98.4  | 6.34 | 5.08  | 2 | 1 |
| -3.2E+18 | IsMasterProtein | A0A8C5ARQ5 | Myosin heavy chain, fast skeletal muscle-like OS=Gadus morhua OX=8049 GN=LOC115542548 PE=3 SV=1             | 5  | 9 | 9  | 2 | 1935 | 221.2 | 5.78 | 20.56 | 9 | 1 |
| -3.2E+18 | IsMasterProtein | A0A8C5BMB0 | Mitogen-activated protein kinase kinase kinase 3 OS=Gadus morhua OX=8049 PE=4 SV=1                          | 9  | 2 | 2  | 2 | 598  | 66.9  | 9.06 | 5.14  | 2 | 1 |
| -3.1E+18 | IsMasterProtein | A0A8C5AI00 | Proteasome subunit alpha type OS=Gadus morhua OX=8049 GN=psma3 PE=3 SV=1                                    | 8  | 2 | 2  | 2 | 257  | 28.7  | 7.31 | 4.75  | 2 | 1 |

|          |                 |             |                                                                                                                |    |   |   |   |      |       |      |       |   |   |
|----------|-----------------|-------------|----------------------------------------------------------------------------------------------------------------|----|---|---|---|------|-------|------|-------|---|---|
| -3.1E+18 | IsMasterProtein | A0A8C5B7V0  | Oxysterol-binding protein OS=Gadus morhua OX=8049 PE=3 SV=1                                                    | 4  | 2 | 2 | 2 | 562  | 64.2  | 6.49 | 4.31  | 2 | 1 |
| -3.1E+18 | IsMasterProtein | A0A8C5C6Z9  | Interferon-induced very large GTPase 1-like OS=Gadus morhua OX=8049 GN=LOC115529041 PE=3 SV=1                  | 4  | 3 | 3 | 2 | 1742 | 198.9 | 7.44 | 7.27  | 3 | 1 |
| -3.1E+18 | IsMasterProtein | A0A8C4YVG7  | Ring finger protein 130 OS=Gadus morhua OX=8049 PE=4 SV=1                                                      | 12 | 2 | 6 | 2 | 369  | 40.3  | 8.43 | 15.78 | 2 | 1 |
| -3E+18   | IsMasterProtein | A0A8C5AHR4  | BTB domain-containing protein OS=Gadus morhua OX=8049 PE=4 SV=1                                                | 7  | 2 | 4 | 2 | 613  | 67.5  | 6.64 | 9.32  | 2 | 1 |
| -3E+18   | IsMasterProtein | A0A8C5BHM0  | Eukaryotic translation initiation factor 3 subunit G OS=Gadus morhua OX=8049 GN=eif3g PE=3 SV=1                | 8  | 2 | 2 | 2 | 289  | 32.3  | 8.46 | 5.25  | 2 | 1 |
| -3E+18   | IsMasterProtein | A0A8C5F3J0  | Nucleoporin 50 OS=Gadus morhua OX=8049 GN=nup50 PE=4 SV=1                                                      | 9  | 2 | 2 | 2 | 510  | 51.5  | 7.36 | 4.52  | 2 | 1 |
| -3E+18   | IsMasterProtein | A0A8C5ADQ7  | Acyl-CoA synthetase family member 2 OS=Gadus morhua OX=8049 GN=acsf2 PE=3 SV=1                                 | 11 | 2 | 3 | 2 | 568  | 63    | 6.48 | 9.71  | 2 | 1 |
| -3E+18   | IsMasterProtein | A0A8C5ACY3  | Zinc finger homeobox 3 OS=Gadus morhua OX=8049 PE=4 SV=1                                                       | 1  | 3 | 3 | 2 | 3924 | 429.9 | 6.52 | 6.89  | 3 | 1 |
| -3E+18   | IsMasterProtein | A0A8C5A6D0  | Uncharacterized protein OS=Gadus morhua OX=8049 PE=4 SV=1                                                      | 2  | 2 | 2 | 2 | 1198 | 121.9 | 7.59 | 5.8   | 2 | 1 |
| -2.9E+18 | IsMasterProtein | cRAP_P00760 | Cationic trypsin OS=Bos taurus PE=1 SV=3                                                                       | 10 | 2 | 2 | 2 | 246  | 25.8  | 8.07 | 6.16  | 2 | 1 |
| -2.9E+18 | IsMasterProtein | A0A8C4ZHK9  | Kinetochore associated 1 OS=Gadus morhua OX=8049 GN=KNTC1 PE=4 SV=1                                            | 2  | 2 | 2 | 2 | 1989 | 224.1 | 6.52 | 5.83  | 2 | 1 |
| -2.9E+18 | IsMasterProtein | A0A8C5BND8  | Thrombospondin, type I, domain containing 7Ba OS=Gadus morhua OX=8049 PE=4 SV=1                                | 2  | 2 | 2 | 2 | 1574 | 173.4 | 7.87 | 5.26  | 2 | 1 |
| -2.9E+18 | IsMasterProtein | A0A8C5CL28  | Conserved oligomeric Golgi complex subunit 4 OS=Gadus morhua OX=8049 GN=cog4 PE=3 SV=1                         | 4  | 2 | 3 | 2 | 757  | 85.3  | 6.54 | 5.1   | 2 | 1 |
| -2.9E+18 | IsMasterProtein | A0A8C5F546  | GDP-Man:Man(3)GlcNAc(2)-PP-Dol alpha-1,2-mannosyltransferase OS=Gadus morhua OX=8049 GN=LOC115533365 PE=3 SV=1 | 9  | 2 | 2 | 2 | 532  | 59    | 5.96 | 5.46  | 2 | 1 |
| -2.9E+18 | IsMasterProtein | A0A8C5ACA6  | Furry homolog, like OS=Gadus morhua OX=8049 PE=4 SV=1                                                          | 2  | 4 | 6 | 2 | 3158 | 352.1 | 5.92 | 14.22 | 4 | 1 |
| -2.9E+18 | IsMasterProtein | A0A8C4ZQX5  | Activity-dependent neuroprotector homeobox protein 2-like OS=Gadus morhua OX=8049 GN=LOC115553390 PE=4 SV=1    | 4  | 2 | 2 | 2 | 1146 | 122.6 | 9.52 | 5.15  | 2 | 1 |
| -2.9E+18 | IsMasterProtein | A0A8C5CVY8  | Glutamine and serine rich 1 OS=Gadus morhua OX=8049 GN=depdc7a PE=4 SV=1                                       | 3  | 2 | 3 | 2 | 1703 | 185.5 | 8.03 | 7.13  | 2 | 1 |
| -2.9E+18 | IsMasterProtein | A0A8C5AYU2  | Uncharacterized protein OS=Gadus morhua OX=8049 PE=3 SV=1                                                      | 4  | 2 | 2 | 2 | 906  | 100.6 | 5.59 | 4.77  | 2 | 1 |
| -2.8E+18 | IsMasterProtein | A0A8C4ZKN0  | Centrosomal protein 57, like 1 OS=Gadus morhua OX=8049 GN=cep57l1 PE=3 SV=1                                    | 6  | 2 | 2 | 2 | 484  | 53.8  | 9.7  | 5.59  | 2 | 1 |
| -2.8E+18 | IsMasterProtein | A0A8C5A505  | HECT-type E3 ubiquitin transferase OS=Gadus morhua OX=8049 PE=4 SV=1                                           | 2  | 2 | 2 | 2 | 1109 | 125.5 | 7.84 | 4.55  | 2 | 1 |
| -2.8E+18 | IsMasterProtein | A0A8C4Z8F6  | Cilia and flagella associated protein 61 OS=Gadus morhua OX=8049 GN=CFAP61 PE=4 SV=1                           | 3  | 2 | 2 | 2 | 1279 | 139.5 | 5.74 | 4.94  | 2 | 1 |
| -2.8E+18 | IsMasterProtein | A0A8C5CHP8  | Protocadherin 8 OS=Gadus morhua OX=8049 PE=4 SV=1                                                              | 4  | 2 | 2 | 2 | 918  | 100.6 | 6.39 | 5.65  | 2 | 1 |
| -2.8E+18 | IsMasterProtein | A0A8C5CHA5  | Potassium channel subfamily K member OS=Gadus morhua OX=8049 GN=knk1b PE=3 SV=1                                | 10 | 2 | 2 | 2 | 335  | 37.9  | 7.11 | 4.55  | 2 | 1 |
| -2.8E+18 | IsMasterProtein | A0A8C5B2N9  | SMC5-SMC6 complex localization factor 1 OS=Gadus morhua OX=8049 GN=slf1 PE=4 SV=1                              | 13 | 2 | 5 | 2 | 334  | 36.7  | 8.44 | 13.54 | 2 | 1 |
| -2.8E+18 | IsMasterProtein | A0A8C4ZUP1  | SRY-box transcription factor 3 OS=Gadus morhua OX=8049 GN=sox3 PE=4 SV=1                                       | 9  | 2 | 2 | 2 | 300  | 33.3  | 9.61 | 5.94  | 2 | 1 |
| -2.8E+18 | IsMasterProtein | A0A8C5AXJ4  | Si:dkey-16l2.17 OS=Gadus morhua OX=8049 PE=4 SV=1                                                              | 11 | 2 | 2 | 2 | 311  | 33.6  | 5.02 | 5.39  | 2 | 1 |
| -2.8E+18 | IsMasterProtein | A0A8C5CD80  | Coiled-coil domain-containing protein 39 OS=Gadus morhua OX=8049 GN=ccdc39 PE=3 SV=1                           | 4  | 2 | 2 | 2 | 919  | 106.3 | 7.06 | 5.28  | 2 | 1 |
| -2.7E+18 | IsMasterProtein | A0A8C5CC75  | Protein MTSS 1-like OS=Gadus morhua OX=8049 GN=LOC115554614 PE=4 SV=1                                          | 6  | 2 | 2 | 2 | 743  | 80.3  | 7.99 | 5.42  | 2 | 1 |
| -2.7E+18 | IsMasterProtein | A0A8C5F9N8  | KIAA0232 ortholog OS=Gadus morhua OX=8049 GN=kiaa0232 PE=4 SV=1                                                | 3  | 2 | 2 | 2 | 1346 | 147   | 4.92 | 5.57  | 2 | 1 |
| -2.7E+18 | IsMasterProtein | A0A8C5BZF5  | Uncharacterized protein OS=Gadus morhua OX=8049 PE=3 SV=1                                                      | 5  | 6 | 6 | 2 | 1863 | 214.5 | 5.87 | 14.41 | 6 | 1 |
| -2.7E+18 | IsMasterProtein | A0A8C5AP34  | Protein CASC3 OS=Gadus morhua OX=8049 GN=CASC3 PE=3 SV=1                                                       | 4  | 2 | 2 | 2 | 984  | 103.7 | 4.84 | 4.78  | 2 | 1 |
| -2.7E+18 | IsMasterProtein | A0A8C5CB06  | Uncharacterized LOC115547024 OS=Gadus morhua OX=8049 GN=si:dkey-250d21.1 PE=4 SV=1                             | 1  | 2 | 2 | 2 | 2484 | 277.7 | 5.14 | 4.93  | 2 | 1 |
| -2.7E+18 | IsMasterProtein | A0A8C4ZIP7  | COMM domain-containing protein 1 OS=Gadus morhua OX=8049 GN=commd1 PE=4 SV=1                                   | 9  | 2 | 2 | 2 | 191  | 21    | 6.11 | 4.62  | 2 | 1 |
| -2.7E+18 | IsMasterProtein | A0A8C5AK65  | Myosin VIIAa OS=Gadus morhua OX=8049 PE=3 SV=1                                                                 | 1  | 2 | 2 | 2 | 2158 | 248.3 | 8.84 | 4.89  | 2 | 1 |
| -2.7E+18 | IsMasterProtein | A0A8C5FED0  | Serine threonine kinase 39 OS=Gadus morhua OX=8049 PE=4 SV=1                                                   | 15 | 2 | 2 | 2 | 380  | 41.6  | 6.64 | 5.52  | 2 | 1 |

|          |                 |            |                                                                                                           |    |   |   |   |      |       |       |       |   |   |
|----------|-----------------|------------|-----------------------------------------------------------------------------------------------------------|----|---|---|---|------|-------|-------|-------|---|---|
| -2.7E+18 | IsMasterProtein | A0A8C5BZ84 | Potassium inwardly rectifying channel subfamily J member 8 OS=Gadus morhua OX=8049 GN=kcj8 PE=3 SV=1      | 4  | 2 | 2 | 2 | 419  | 46.8  | 9.52  | 4.36  | 2 | 1 |
| -2.7E+18 | IsMasterProtein | A0A8C5CZS6 | NADH dehydrogenase [ubiquinone] flavoprotein 1, mitochondrial OS=Gadus morhua OX=8049 GN=ndufv1 PE=3 SV=1 | 4  | 2 | 2 | 2 | 450  | 49.4  | 7.77  | 4.91  | 2 | 1 |
| -2.7E+18 | IsMasterProtein | A0A8C5FF81 | Phospholipid-transporting ATPase OS=Gadus morhua OX=8049 GN=atp8b2 PE=3 SV=1                              | 3  | 2 | 3 | 2 | 1517 | 163.6 | 5.66  | 7.16  | 2 | 1 |
| -2.7E+18 | IsMasterProtein | A0A8C4ZQ39 | Leucine rich repeat containing 73 OS=Gadus morhua OX=8049 PE=4 SV=1                                       | 8  | 2 | 2 | 2 | 304  | 31.9  | 4.67  | 4.52  | 2 | 1 |
| -2.6E+18 | IsMasterProtein | A0A8C5BG59 | Discs, large (Drosophila) homolog-associated protein 2a OS=Gadus morhua OX=8049 GN=DLGAP2 PE=3 SV=1       | 9  | 2 | 2 | 2 | 511  | 55.3  | 7.81  | 5.53  | 2 | 1 |
| -2.6E+18 | IsMasterProtein | A0A8C4ZHD2 | STAM binding protein OS=Gadus morhua OX=8049 GN=stambp PE=3 SV=1                                          | 9  | 2 | 2 | 2 | 443  | 49.9  | 6.48  | 5.43  | 2 | 1 |
| -2.6E+18 | IsMasterProtein | A0A8C5BAG6 | Transcription activation suppressor a OS=Gadus morhua OX=8049 PE=3 SV=1                                   | 2  | 2 | 2 | 2 | 1767 | 192.1 | 6.06  | 5.25  | 2 | 1 |
| -2.6E+18 | IsMasterProtein | A0A8C5FNC4 | Solute carrier family 38 member 10 OS=Gadus morhua OX=8049 GN=slc38a10 PE=4 SV=1                          | 3  | 2 | 6 | 2 | 1022 | 110   | 5.97  | 13.75 | 2 | 1 |
| -2.6E+18 | IsMasterProtein | A0A8C5AUT7 | Uncharacterized protein OS=Gadus morhua OX=8049 PE=4 SV=1                                                 | 5  | 2 | 2 | 2 | 604  | 66.6  | 9.23  | 4.96  | 2 | 1 |
| -2.6E+18 | IsMasterProtein | A0A8C5CKR0 | Serine/threonine-protein kinase BRK2-like OS=Gadus morhua OX=8049 GN=LOC115531176 PE=4 SV=1               | 5  | 2 | 2 | 2 | 765  | 84.5  | 8.95  | 5.54  | 2 | 1 |
| -2.6E+18 | IsMasterProtein | A0A8C5C4T6 | Polypeptide N-acetylgalactosaminyltransferase OS=Gadus morhua OX=8049 GN=GALNT5 PE=3 SV=1                 | 5  | 2 | 2 | 2 | 731  | 82.7  | 9.22  | 5.21  | 2 | 1 |
| -2.6E+18 | IsMasterProtein | A0A8C4YUP2 | Trafficking protein particle complex 12 OS=Gadus morhua OX=8049 GN=trappc12 PE=4 SV=1                     | 6  | 2 | 2 | 2 | 819  | 89.4  | 4.79  | 5.96  | 2 | 1 |
| -2.6E+18 | IsMasterProtein | A0A8C5CDW1 | Uncharacterized protein OS=Gadus morhua OX=8049 PE=4 SV=1                                                 | 14 | 2 | 2 | 2 | 290  | 32.4  | 10.02 | 5.14  | 2 | 1 |
| -2.6E+18 | IsMasterProtein | A0A8C5FG81 | LEM domain containing 3 OS=Gadus morhua OX=8049 GN=lemd3 PE=4 SV=1                                        | 5  | 2 | 2 | 2 | 919  | 101   | 8.7   | 4.67  | 2 | 1 |
| -2.6E+18 | IsMasterProtein | A0A8C4Z6X4 | Codanin-1 C domain-containing protein OS=Gadus morhua OX=8049 PE=4 SV=1                                   | 7  | 2 | 2 | 2 | 690  | 75.8  | 8.13  | 5.44  | 2 | 1 |
| -2.5E+18 | IsMasterProtein | A0A8C4ZVN0 | Kinesin motor domain-containing protein OS=Gadus morhua OX=8049 PE=3 SV=1                                 | 4  | 2 | 2 | 2 | 1660 | 176.8 | 9.19  | 6.62  | 2 | 1 |
| -2.5E+18 | IsMasterProtein | A0A8C5FI51 | Peptidase M12B domain-containing protein OS=Gadus morhua OX=8049 PE=4 SV=1                                | 3  | 2 | 2 | 2 | 943  | 102.4 | 8.51  | 4.95  | 2 | 1 |
| -2.5E+18 | IsMasterProtein | A0A8C4YYT2 | LUC7-like 3 pre-mRNA splicing factor OS=Gadus morhua OX=8049 GN=luc7l3 PE=3 SV=1                          | 5  | 2 | 2 | 2 | 500  | 59.2  | 9.54  | 5.47  | 2 | 1 |
| -2.5E+18 | IsMasterProtein | A0A8C5C1J7 | Ureidopropionase, beta OS=Gadus morhua OX=8049 GN=upb1 PE=4 SV=1                                          | 11 | 2 | 3 | 2 | 382  | 43    | 6.42  | 7.42  | 2 | 1 |
| -2.5E+18 | IsMasterProtein | A0A8C4Z781 | Fli-1 proto-oncogene, ETS transcription factor OS=Gadus morhua OX=8049 GN=fli1 PE=3 SV=1                  | 9  | 2 | 2 | 2 | 476  | 53.8  | 7.28  | 5.36  | 2 | 1 |
| -2.5E+18 | IsMasterProtein | A0A8C5BZK2 | PTPRF interacting protein alpha 3 OS=Gadus morhua OX=8049 PE=3 SV=1                                       | 2  | 2 | 2 | 2 | 1167 | 132.1 | 6.11  | 4.66  | 2 | 1 |
| -2.5E+18 | IsMasterProtein | A0A8C5AN13 | Uncharacterized protein OS=Gadus morhua OX=8049 PE=4 SV=1                                                 | 6  | 2 | 2 | 2 | 542  | 61.9  | 8.68  | 5.1   | 2 | 1 |
| -2.5E+18 | IsMasterProtein | A0A8C5CK05 | Calumenin b OS=Gadus morhua OX=8049 GN=calub PE=3 SV=1                                                    | 7  | 2 | 2 | 2 | 315  | 37.1  | 4.58  | 7.12  | 2 | 1 |
| -2.5E+18 | IsMasterProtein | A0A8C5BG7  | SEC31 homolog B, COPII coat complex component OS=Gadus morhua OX=8049 PE=3 SV=1                           | 2  | 2 | 2 | 2 | 1028 | 112.1 | 6.27  | 5.15  | 2 | 1 |
| -2.5E+18 | IsMasterProtein | A0A8C4ZAV1 | Beaded filament structural protein 2, phakinin OS=Gadus morhua OX=8049 GN=bfsp2 PE=4 SV=1                 | 10 | 2 | 2 | 2 | 432  | 48.1  | 5.3   | 4.87  | 2 | 1 |
| -2.4E+18 | IsMasterProtein | A0A8C5A281 | Tripartite motif containing 46b OS=Gadus morhua OX=8049 GN=trim46b PE=4 SV=1                              | 6  | 2 | 2 | 2 | 790  | 87.7  | 7.91  | 6.03  | 2 | 1 |
| -2.4E+18 | IsMasterProtein | A0A8C5D0W3 | Opioid growth factor receptor OS=Gadus morhua OX=8049 GN=ogfr PE=3 SV=1                                   | 7  | 2 | 2 | 2 | 561  | 62.7  | 5.02  | 5.42  | 2 | 1 |
| -2.4E+18 | IsMasterProtein | A0A8C4Z007 | RNA binding motif single stranded interacting protein 3 OS=Gadus morhua OX=8049 GN=RBMS3 PE=4 SV=1        | 13 | 2 | 2 | 2 | 378  | 40.8  | 9.01  | 5.82  | 2 | 1 |
| -2.4E+18 | IsMasterProtein | A0A8C4YZG1 | DNA replication complex GINS protein PSF1 OS=Gadus morhua OX=8049 GN=gins1 PE=3 SV=1                      | 17 | 2 | 2 | 2 | 196  | 23    | 7.34  | 4.8   | 2 | 1 |
| -2.4E+18 | IsMasterProtein | A0A8C4ZH53 | Methyltransferase like 13 OS=Gadus morhua OX=8049 GN=mettl13 PE=4 SV=1                                    | 5  | 2 | 2 | 2 | 695  | 76.5  | 6.23  | 4.75  | 2 | 1 |
| -2.4E+18 | IsMasterProtein | A0A8C5AYU9 | SHC (Src homology 2 domain containing) transforming protein 3 OS=Gadus morhua OX=8049 GN=shc3 PE=4 SV=1   | 13 | 2 | 2 | 2 | 433  | 46.3  | 7.58  | 6.02  | 2 | 1 |
| -2.4E+18 | IsMasterProtein | A0A8C4ZSU0 | Vasohibin 2 OS=Gadus morhua OX=8049 GN=vash2 PE=4 SV=1                                                    | 10 | 2 | 2 | 2 | 372  | 42.2  | 9.91  | 5.11  | 2 | 1 |



|          |                 |            |                                                                                                                            |    |    |    |   |      |       |       |       |    |   |
|----------|-----------------|------------|----------------------------------------------------------------------------------------------------------------------------|----|----|----|---|------|-------|-------|-------|----|---|
| -2.4E+18 | IsMasterProtein | A0A8C5B8H5 | Spectrin beta chain OS=Gadus morhua OX=8049 PE=3 SV=1                                                                      | 3  | 4  | 4  | 2 | 2130 | 244.1 | 5.6   | 10.72 | 4  | 1 |
| -2.4E+18 | IsMasterProtein | A0A8C5AZN6 | Non-specific serine/threonine protein kinase OS=Gadus morhua OX=8049 GN=MAST4 PE=3 SV=1                                    | 2  | 2  | 2  | 2 | 2239 | 245.1 | 8.68  | 5.31  | 2  | 1 |
| -2.4E+18 | IsMasterProtein | A0A8C5BU25 | Ankyrin repeat and fibronectin type-III domain-containing protein 1-like OS=Gadus morhua OX=8049 GN=LOC115537565 PE=4 SV=1 | 3  | 2  | 2  | 2 | 1092 | 120.2 | 6.21  | 5.39  | 2  | 1 |
| -2.4E+18 | IsMasterProtein | A0A8C5BWK9 | Serine and arginine rich splicing factor 7a OS=Gadus morhua OX=8049 GN=srsf7a PE=4 SV=1                                    | 12 | 2  | 2  | 2 | 259  | 29.3  | 11.88 | 5.04  | 2  | 1 |
| -2.3E+18 | IsMasterProtein | A0A8C5BSB2 | Protein-tyrosine-phosphatase OS=Gadus morhua OX=8049 GN=ptpro PE=4 SV=1                                                    | 2  | 2  | 2  | 2 | 1213 | 135.3 | 6.44  | 4.29  | 2  | 1 |
| -2.3E+18 | IsMasterProtein | A0A8C4Z465 | Platelet endothelial aggregation receptor 1 OS=Gadus morhua OX=8049 GN=pearl1 PE=4 SV=1                                    | 6  | 2  | 2  | 2 | 1000 | 107.8 | 7.02  | 5.16  | 2  | 1 |
| -2.3E+18 | IsMasterProtein | A0A8C5C8Q1 | Phosphotriesterase-related protein OS=Gadus morhua OX=8049 GN=ptpr PE=3 SV=1                                               | 14 | 2  | 2  | 2 | 347  | 38.5  | 6.33  | 5.37  | 2  | 1 |
| -2.3E+18 | IsMasterProtein | A0A8C5D027 | Steroid hormone receptor ERR2-like OS=Gadus morhua OX=8049 GN=LOC115534164 PE=3 SV=1                                       | 7  | 2  | 2  | 2 | 487  | 52.7  | 7.28  | 5.48  | 2  | 1 |
| -2.3E+18 | IsMasterProtein | A0A8C5CHD9 | Uncharacterized protein OS=Gadus morhua OX=8049 PE=4 SV=1                                                                  | 7  | 2  | 2  | 2 | 819  | 86.9  | 10.21 | 5.08  | 2  | 1 |
| -2.3E+18 | IsMasterProtein | A0A8C5CXZ2 | MUS81 structure-specific endonuclease subunit OS=Gadus morhua OX=8049 GN=mus81 PE=3 SV=1                                   | 5  | 2  | 2  | 2 | 625  | 68.5  | 8.81  | 4.43  | 2  | 1 |
| -2.2E+18 | IsMasterProtein | A0A8C5AFL2 | Uncharacterized protein OS=Gadus morhua OX=8049 PE=4 SV=1                                                                  | 4  | 2  | 2  | 2 | 693  | 78.4  | 5.82  | 5.14  | 2  | 1 |
| -2.2E+18 | IsMasterProtein | A0A8C5BYH7 | Uncharacterized protein OS=Gadus morhua OX=8049 PE=4 SV=1                                                                  | 2  | 2  | 2  | 2 | 970  | 111.5 | 5.15  | 4.11  | 2  | 1 |
| -2.2E+18 | IsMasterProtein | A0A8C4ZJ62 | Lymphotoxin-alpha OS=Gadus morhua OX=8049 PE=3 SV=1                                                                        | 9  | 2  | 3  | 2 | 234  | 26.4  | 8.18  | 8.49  | 2  | 1 |
| -2.2E+18 | IsMasterProtein | A0A8C5AIE7 | Gelsolin OS=Gadus morhua OX=8049 PE=4 SV=1                                                                                 | 4  | 2  | 2  | 2 | 707  | 77.8  | 4.89  | 4.18  | 2  | 1 |
| -2.2E+18 | IsMasterProtein | A0A8C4YZQ6 | RING-type E3 ubiquitin transferase OS=Gadus morhua OX=8049 GN=mid2 PE=4 SV=1                                               | 7  | 2  | 3  | 2 | 672  | 76    | 7.37  | 8.8   | 2  | 1 |
| -2.2E+18 | IsMasterProtein | A0A8C5FIT6 | Uncharacterized protein OS=Gadus morhua OX=8049 PE=4 SV=1                                                                  | 5  | 2  | 2  | 2 | 739  | 82.8  | 9.22  | 4.72  | 2  | 1 |
| -2.2E+18 | IsMasterProtein | A0A8C5AB97 | Chitinase OS=Gadus morhua OX=8049 PE=3 SV=1                                                                                | 14 | 4  | 5  | 2 | 455  | 50    | 6.35  | 14.07 | 4  | 1 |
| -2.1E+18 | IsMasterProtein | A0A8C4ZS47 | Heterogeneous nuclear ribonucleoprotein D OS=Gadus morhua OX=8049 GN=hnrnpd PE=4 SV=1                                      | 7  | 2  | 2  | 2 | 321  | 35.8  | 5.53  | 6.51  | 2  | 1 |
| -2.1E+18 | IsMasterProtein | A0A8C5F4W8 | Transcription initiation factor IIE subunit beta OS=Gadus morhua OX=8049 GN=GTF2E2 PE=3 SV=1                               | 8  | 2  | 2  | 2 | 314  | 35.3  | 9.5   | 4.25  | 2  | 1 |
| -2.1E+18 | IsMasterProtein | A0A8C5CRU5 | Uncharacterized protein OS=Gadus morhua OX=8049 PE=4 SV=1                                                                  | 3  | 2  | 2  | 2 | 1704 | 192.1 | 7.81  | 5.44  | 2  | 1 |
| -2.1E+18 | IsMasterProtein | A0A8C5AMY8 | Dual-specificity kinase OS=Gadus morhua OX=8049 GN=dyrk1ab PE=3 SV=1                                                       | 4  | 2  | 2  | 2 | 714  | 79.5  | 8.75  | 4.31  | 2  | 1 |
| -2.1E+18 | IsMasterProtein | A0A8C5BJW1 | Smoothelin b OS=Gadus morhua OX=8049 GN=smtnb PE=4 SV=1                                                                    | 3  | 2  | 2  | 2 | 1019 | 109.4 | 7.28  | 5.13  | 2  | 1 |
| -2.1E+18 | IsMasterProtein | A0A8C4Z182 | Cytochrome P450 2K1-like OS=Gadus morhua OX=8049 GN=LOC115556605 PE=3 SV=1                                                 | 10 | 2  | 2  | 2 | 500  | 56.5  | 8.09  | 5.81  | 2  | 1 |
| -2.1E+18 | IsMasterProtein | A0A8C5B2X8 | Non-specific serine/threonine protein kinase OS=Gadus morhua OX=8049 PE=4 SV=1                                             | 2  | 2  | 2  | 2 | 1264 | 141.3 | 6.71  | 4.68  | 2  | 1 |
| -2.1E+18 | IsMasterProtein | A0A8C4ZA70 | Myosin light chain kinase, smooth muscle-like OS=Gadus morhua OX=8049 GN=LOC115531009 PE=3 SV=1                            | 4  | 2  | 2  | 2 | 807  | 90.1  | 6.8   | 5.63  | 2  | 1 |
| -2.1E+18 | IsMasterProtein | A0A8C5C6A2 | Centrosomal protein 104 OS=Gadus morhua OX=8049 GN=cep104 PE=4 SV=1                                                        | 2  | 2  | 2  | 2 | 1063 | 116.2 | 8.76  | 4.51  | 2  | 1 |
| -2E+18   | IsMasterProtein | A0A8C5BI30 | Tafazzin family protein OS=Gadus morhua OX=8049 GN=taz PE=3 SV=1                                                           | 14 | 2  | 3  | 2 | 263  | 30    | 8.81  | 8.31  | 2  | 1 |
| -2E+18   | IsMasterProtein | A0A8C5F947 | A20-type domain-containing protein OS=Gadus morhua OX=8049 PE=4 SV=1                                                       | 21 | 2  | 2  | 2 | 220  | 22.9  | 5.41  | 5.57  | 2  | 1 |
| -2E+18   | IsMasterProtein | A0A8C5AU56 | Uncharacterized protein OS=Gadus morhua OX=8049 PE=4 SV=1                                                                  | 2  | 3  | 3  | 2 | 3414 | 380.2 | 6.48  | 8.13  | 3  | 1 |
| -2E+18   | IsMasterProtein | A0A8C5BEF4 | Podocalyxin-like 2 OS=Gadus morhua OX=8049 GN=podxl2 PE=4 SV=1                                                             | 7  | 2  | 2  | 2 | 673  | 73.2  | 4.7   | 6.24  | 2  | 1 |
| -2E+18   | IsMasterProtein | A0A8C4ZDV5 | Uncharacterized protein OS=Gadus morhua OX=8049 PE=4 SV=1                                                                  | 11 | 13 | 17 | 2 | 1593 | 176.1 | 6     | 46.38 | 13 | 1 |
| -2E+18   | IsMasterProtein | A0A8C5C3K2 | YTH domain containing 1 OS=Gadus morhua OX=8049 GN=ythdc1 PE=4 SV=1                                                        | 5  | 3  | 4  | 2 | 734  | 82.8  | 6.55  | 9.22  | 3  | 1 |
| -2E+18   | IsMasterProtein | A0A8C5BVY6 | Hepatic triacylglycerol lipase OS=Gadus morhua OX=8049 PE=3 SV=1                                                           | 11 | 2  | 2  | 2 | 486  | 54.5  | 8.68  | 5.04  | 2  | 1 |
| -2E+18   | IsMasterProtein | A0A8C5FWD3 | Chromosome 2 C16orf89 homolog OS=Gadus morhua OX=8049 GN=C16orf89 PE=4 SV=1                                                | 6  | 2  | 3  | 2 | 365  | 40.9  | 6.37  | 6.89  | 2  | 1 |
| -2E+18   | IsMasterProtein | A0A8C4ZNL6 | Lymphoid enhancer-binding factor 1 OS=Gadus morhua OX=8049 GN=lef1 PE=3 SV=1                                               | 7  | 2  | 2  | 2 | 377  | 42.3  | 6.96  | 4.56  | 2  | 1 |

|          |                 |            |                                                                                                                                                  |    |   |    |   |      |       |      |       |   |   |
|----------|-----------------|------------|--------------------------------------------------------------------------------------------------------------------------------------------------|----|---|----|---|------|-------|------|-------|---|---|
| -2E+18   | IsMasterProtein | A0A8C5F5N8 | Nuclear speckle splicing regulatory protein 1 OS=Gadus morhua OX=8049 PE=3 SV=1                                                                  | 6  | 2 | 2  | 2 | 427  | 49.1  | 9.07 | 4.53  | 2 | 1 |
| -2E+18   | IsMasterProtein | A0A8C4YX92 | Glutamate receptor OS=Gadus morhua OX=8049 GN=si:ch211-251b21.1 PE=3 SV=1                                                                        | 7  | 2 | 2  | 2 | 460  | 50.3  | 5.96 | 5.31  | 2 | 1 |
| -2E+18   | IsMasterProtein | A0A8C5AKI5 | Synaptotagmin VIIb OS=Gadus morhua OX=8049 PE=4 SV=1                                                                                             | 11 | 2 | 13 | 2 | 451  | 50.7  | 8.65 | 32.64 | 2 | 1 |
| -1.9E+18 | IsMasterProtein | A0A8C4YWQ9 | Rho GTPase-activating protein 19-like OS=Gadus morhua OX=8049 GN=LOC115540648 PE=4 SV=1                                                          | 7  | 2 | 2  | 2 | 525  | 58.2  | 9.64 | 5.26  | 2 | 1 |
| -1.9E+18 | IsMasterProtein | A0A8C5BVI3 | Neuropeptide Y receptor type 2 OS=Gadus morhua OX=8049 PE=3 SV=1                                                                                 | 6  | 2 | 2  | 2 | 456  | 48.4  | 8.79 | 5.22  | 2 | 1 |
| -1.9E+18 | IsMasterProtein | A0A8C4ZDI6 | Dispatched homolog 2 (Drosophila) OS=Gadus morhua OX=8049 PE=4 SV=1                                                                              | 4  | 2 | 2  | 2 | 1301 | 143.9 | 6.8  | 5.45  | 2 | 1 |
| -1.9E+18 | IsMasterProtein | A0A8C5B2F2 | Uncharacterized LOC115544441 OS=Gadus morhua OX=8049 GN=zgc:153867 PE=4 SV=1                                                                     | 23 | 3 | 3  | 2 | 155  | 17.4  | 4.75 | 7.86  | 3 | 1 |
| -1.9E+18 | IsMasterProtein | A0A8C5AJ86 | PHD finger protein 21Ab OS=Gadus morhua OX=8049 PE=4 SV=1                                                                                        | 4  | 2 | 2  | 2 | 931  | 97.9  | 8.47 | 4.74  | 2 | 1 |
| -1.9E+18 | IsMasterProtein | A0A8C5FMP5 | Uncharacterized protein OS=Gadus morhua OX=8049 PE=4 SV=1                                                                                        | 3  | 2 | 2  | 2 | 1558 | 166.6 | 7.96 | 5.58  | 2 | 1 |
| -1.9E+18 | IsMasterProtein | A0A8C4ZKF3 | Zmp:0000001088 OS=Gadus morhua OX=8049 PE=4 SV=1                                                                                                 | 11 | 2 | 2  | 2 | 237  | 25.8  | 7.83 | 6.49  | 2 | 1 |
| -1.9E+18 | IsMasterProtein | A0A8C5B6I8 | Myelin basic protein OS=Gadus morhua OX=8049 PE=3 SV=1                                                                                           | 22 | 2 | 2  | 2 | 125  | 13.6  | 9.95 | 6.64  | 2 | 1 |
| -1.8E+18 | IsMasterProtein | A0A8C5BLN0 | Uncharacterized protein OS=Gadus morhua OX=8049 PE=4 SV=1                                                                                        | 3  | 2 | 2  | 2 | 1332 | 143.3 | 5.66 | 5.15  | 2 | 1 |
| -1.8E+18 | IsMasterProtein | A0A8C5CXS0 | Poly(A)-specific ribonuclease OS=Gadus morhua OX=8049 GN=LOC115541259 PE=3 SV=1                                                                  | 3  | 2 | 2  | 2 | 555  | 62.1  | 6.68 | 4.42  | 2 | 1 |
| -1.8E+18 | IsMasterProtein | A0A8C5CHE7 | SWI/SNF related, matrix associated, actin dependent regulator of chromatin, subfamily c, member 1a OS=Gadus morhua OX=8049 GN=smarcc1a PE=4 SV=1 | 4  | 2 | 2  | 2 | 996  | 110.9 | 6.38 | 4.8   | 2 | 1 |
| -1.8E+18 | IsMasterProtein | A0A8C4YZX7 | Fatty acid amide hydrolase 2b OS=Gadus morhua OX=8049 GN=faah2b PE=3 SV=1                                                                        | 9  | 2 | 2  | 2 | 527  | 57.6  | 6.7  | 5.44  | 2 | 1 |
| -1.8E+18 | IsMasterProtein | A0A8C5CND6 | Protein-arginine deiminase OS=Gadus morhua OX=8049 GN=padi2 PE=3 SV=1                                                                            | 4  | 2 | 2  | 2 | 671  | 75.5  | 5.38 | 5.64  | 2 | 1 |
| -1.8E+18 | IsMasterProtein | A0A8C5CMX1 | von Willebrand factor D and EGF domain-containing protein-like OS=Gadus morhua OX=8049 GN=si:ch211-246m6.5 PE=4 SV=1                             | 3  | 2 | 3  | 2 | 2145 | 230.2 | 7.27 | 9.03  | 2 | 1 |
| -1.8E+18 | IsMasterProtein | A0A8C5F877 | Glycolipid transfer protein-like OS=Gadus morhua OX=8049 GN=LOC115541362 PE=4 SV=1                                                               | 16 | 2 | 3  | 2 | 209  | 23.8  | 5.49 | 7.3   | 2 | 1 |
| -1.8E+18 | IsMasterProtein | A0A8C5BBC8 | Aminopeptidase OS=Gadus morhua OX=8049 GN=anpepb PE=3 SV=1                                                                                       | 4  | 2 | 2  | 2 | 926  | 105.1 | 6.16 | 5.96  | 2 | 1 |
| -1.7E+18 | IsMasterProtein | A0A8C5BRW0 | DNA helicase OS=Gadus morhua OX=8049 GN=chd1 PE=4 SV=1                                                                                           | 3  | 2 | 2  | 2 | 1639 | 186.7 | 7.87 | 6.32  | 2 | 1 |
| -1.7E+18 | IsMasterProtein | A0A8C5C0W3 | Tetratricopeptide repeat domain 33 OS=Gadus morhua OX=8049 GN=ttc33 PE=4 SV=1                                                                    | 13 | 2 | 3  | 2 | 269  | 30.5  | 5.52 | 8.8   | 2 | 1 |
| -1.7E+18 | IsMasterProtein | A0A8C5AK34 | Phosphatidylinositol-4-phosphate 5-kinase, type I, beta a OS=Gadus morhua OX=8049 GN=pip5k1ba PE=4 SV=1                                          | 10 | 2 | 2  | 2 | 481  | 54.2  | 8.81 | 5.06  | 2 | 1 |
| -1.7E+18 | IsMasterProtein | A0A8C4ZW18 | Lissencephaly-1 homolog OS=Gadus morhua OX=8049 GN=pafah1b1b PE=3 SV=1                                                                           | 8  | 2 | 2  | 2 | 410  | 46.5  | 7.37 | 5.12  | 2 | 1 |
| -1.7E+18 | IsMasterProtein | A0A8C5FQ22 | PR domain zinc finger protein 1 OS=Gadus morhua OX=8049 GN=prdm1a PE=3 SV=1                                                                      | 6  | 2 | 2  | 2 | 884  | 96.9  | 8.46 | 5.04  | 2 | 1 |
| -1.7E+18 | IsMasterProtein | A0A8C4ZQA1 | Uncharacterized protein OS=Gadus morhua OX=8049 PE=3 SV=1                                                                                        | 8  | 2 | 2  | 2 | 637  | 70.1  | 6.93 | 5.33  | 2 | 1 |
| -1.7E+18 | IsMasterProtein | A0A8C5ALN3 | Uncharacterized protein OS=Gadus morhua OX=8049 PE=4 SV=1                                                                                        | 5  | 2 | 2  | 2 | 601  | 66.1  | 6.25 | 4.61  | 2 | 1 |
| -1.7E+18 | IsMasterProtein | A0A8C5B3J4 | Toll-like receptor 13 OS=Gadus morhua OX=8049 GN=LOC115533310 PE=3 SV=1                                                                          | 4  | 2 | 2  | 2 | 972  | 111.6 | 8    | 5.12  | 2 | 1 |
| -1.7E+18 | IsMasterProtein | A0A8C5C6S1 | Glutamate receptor, metabotropic 5a OS=Gadus morhua OX=8049 PE=3 SV=1                                                                            | 2  | 2 | 2  | 2 | 1188 | 130   | 7.37 | 4.83  | 2 | 1 |
| -1.6E+18 | IsMasterProtein | A0A8C4Z0Y4 | Mimecan OS=Gadus morhua OX=8049 GN=ognb PE=3 SV=1                                                                                                | 12 | 2 | 2  | 2 | 263  | 29.5  | 7.64 | 5.68  | 2 | 1 |
| -1.6E+18 | IsMasterProtein | A0A8C4ZY65 | BEN domain containing 4 OS=Gadus morhua OX=8049 GN=BEND4 PE=4 SV=1                                                                               | 11 | 2 | 3  | 2 | 516  | 56.1  | 5.36 | 5.94  | 2 | 1 |
| -1.6E+18 | IsMasterProtein | A0A8C5ANC7 | SDR family oxidoreductase OS=Gadus morhua OX=8049 GN=zgc:56585 PE=3 SV=1                                                                         | 7  | 2 | 2  | 2 | 340  | 36.1  | 7.36 | 5.11  | 2 | 1 |
| -1.6E+18 | IsMasterProtein | A0A8C5CTX5 | Carboxypeptidase Q OS=Gadus morhua OX=8049 GN=cpq PE=4 SV=1                                                                                      | 7  | 2 | 2  | 2 | 460  | 50.2  | 5.69 | 6.47  | 2 | 1 |
| -1.6E+18 | IsMasterProtein | A0A8C4ZZ86 | Leucine-rich repeat neuronal protein 4-like OS=Gadus morhua OX=8049 GN=LOC115533293 PE=4 SV=1                                                    | 6  | 2 | 2  | 2 | 424  | 44    | 8.75 | 4.91  | 2 | 1 |
| -1.6E+18 | IsMasterProtein | A0A8C5BEY7 | SPG7 matrix AAA peptidase subunit, paraplegin OS=Gadus morhua OX=8049 GN=spg7 PE=3 SV=1                                                          | 7  | 2 | 2  | 2 | 844  | 93.7  | 9.19 | 5.74  | 2 | 1 |

|          |                 |            |                                                                                                                         |    |   |   |   |      |       |       |      |   |   |
|----------|-----------------|------------|-------------------------------------------------------------------------------------------------------------------------|----|---|---|---|------|-------|-------|------|---|---|
| -1.6E+18 | IsMasterProtein | A0A8C5BKU5 | ASD2 domain-containing protein OS=Gadus morhua OX=8049 PE=3 SV=1                                                        | 7  | 2 | 2 | 2 | 381  | 41.8  | 5.86  | 4.95 | 2 | 1 |
| -1.6E+18 | IsMasterProtein | A0A8C5ANN6 | Adenosine deaminase RNA specific B2 (inactive) OS=Gadus morhua OX=8049 GN=ADARB2 PE=4 SV=1                              | 7  | 2 | 2 | 2 | 635  | 67.9  | 10.71 | 5.8  | 2 | 1 |
| -1.6E+18 | IsMasterProtein | A0A8C5AR27 | Tensin 1b OS=Gadus morhua OX=8049 GN=tns1b PE=3 SV=1                                                                    | 2  | 2 | 2 | 2 | 1955 | 209.7 | 7.2   | 5.18 | 2 | 1 |
| -1.6E+18 | IsMasterProtein | A0A8C5BNC7 | Anion exchange protein OS=Gadus morhua OX=8049 PE=3 SV=1                                                                | 4  | 2 | 2 | 2 | 996  | 111.4 | 7.78  | 5.36 | 2 | 1 |
| -1.5E+18 | IsMasterProtein | A0A8C5BJS8 | Ankyrin repeat domain 44 OS=Gadus morhua OX=8049 GN=ankrd44 PE=4 SV=1                                                   | 6  | 2 | 2 | 2 | 1018 | 108   | 6.39  | 6.23 | 2 | 1 |
| -1.5E+18 | IsMasterProtein | A0A8C4YZF4 | SelP_N domain-containing protein OS=Gadus morhua OX=8049 PE=4 SV=1                                                      | 10 | 2 | 2 | 2 | 215  | 23.2  | 6.84  | 4.48 | 2 | 1 |
| -1.5E+18 | IsMasterProtein | A0A8C5AS30 | TraB domain containing OS=Gadus morhua OX=8049 GN=trabd PE=4 SV=1                                                       | 5  | 2 | 2 | 2 | 377  | 41.6  | 7.74  | 4.54 | 2 | 1 |
| -1.5E+18 | IsMasterProtein | A0A8C4ZCQ8 | Toll interacting protein OS=Gadus morhua OX=8049 GN=tollip PE=3 SV=1                                                    | 11 | 2 | 2 | 2 | 278  | 30.6  | 5.07  | 7.25 | 2 | 1 |
| -1.5E+18 | IsMasterProtein | A0A8C4ZPT0 | S100 calcium binding protein T OS=Gadus morhua OX=8049 PE=4 SV=1                                                        | 19 | 2 | 4 | 2 | 183  | 20.2  | 5.08  | 14.3 | 2 | 1 |
| -1.5E+18 | IsMasterProtein | A0A8C5BAW4 | Tantalus domain-containing protein OS=Gadus morhua OX=8049 PE=4 SV=1                                                    | 6  | 2 | 2 | 2 | 756  | 81.4  | 10.08 | 5.97 | 2 | 1 |
| -1.4E+18 | IsMasterProtein | A0A8C5B916 | Small monomeric GTPase OS=Gadus morhua OX=8049 GN=ralba PE=3 SV=1                                                       | 17 | 2 | 2 | 2 | 207  | 23.5  | 7.15  | 5.79 | 2 | 1 |
| -1.4E+18 | IsMasterProtein | A0A8C5C0K9 | Jacalin-type lectin domain-containing protein OS=Gadus morhua OX=8049 PE=3 SV=1                                         | 8  | 2 | 2 | 2 | 328  | 35.3  | 5.36  | 4.78 | 2 | 1 |
| -1.4E+18 | IsMasterProtein | A0A8C5BPS3 | Uncharacterized protein OS=Gadus morhua OX=8049 PE=4 SV=1                                                               | 6  | 2 | 2 | 2 | 588  | 61.2  | 7.87  | 5.54 | 2 | 1 |
| -1.4E+18 | IsMasterProtein | A0A8C5A0M2 | Disco-interacting protein 2 homolog A OS=Gadus morhua OX=8049 GN=dip2a PE=3 SV=1                                        | 2  | 2 | 2 | 2 | 1578 | 171.7 | 7.84  | 5.05 | 2 | 1 |
| -1.4E+18 | IsMasterProtein | A0A8C5BGL8 | DNA polymerase epsilon catalytic subunit OS=Gadus morhua OX=8049 PE=3 SV=1                                              | 1  | 2 | 2 | 2 | 2246 | 257   | 6.58  | 4.7  | 2 | 1 |
| -1.4E+18 | IsMasterProtein | A0A8C5BFV4 | Nucleolar protein 8 OS=Gadus morhua OX=8049 PE=4 SV=1                                                                   | 3  | 2 | 2 | 2 | 1502 | 165.1 | 4.81  | 5.11 | 2 | 1 |
| -1.4E+18 | IsMasterProtein | A0A8C5CFB3 | Zinc finger, RAN-binding domain containing 3 OS=Gadus morhua OX=8049 GN=zranb3 PE=4 SV=1                                | 4  | 2 | 2 | 2 | 1170 | 129.4 | 7.97  | 5.26 | 2 | 1 |
| -1.4E+18 | IsMasterProtein | A0A8C5BA53 | Dihydropyrimidinase like 3 OS=Gadus morhua OX=8049 GN=dpysl3 PE=3 SV=1                                                  | 5  | 3 | 3 | 2 | 615  | 66.8  | 6.4   | 7.57 | 3 | 1 |
| -1.4E+18 | IsMasterProtein | A0A8C5F916 | Glutathione transferase OS=Gadus morhua OX=8049 GN=gstt1b PE=3 SV=1                                                     | 16 | 2 | 2 | 2 | 241  | 27.7  | 7.03  | 5.93 | 2 | 1 |
| -1.4E+18 | IsMasterProtein | A0A8C5CX25 | TIAM Rac1 associated GEF 2a OS=Gadus morhua OX=8049 GN=tiam2a PE=4 SV=1                                                 | 2  | 2 | 2 | 2 | 1755 | 191.8 | 6.74  | 4.47 | 2 | 1 |
| -1.3E+18 | IsMasterProtein | A0A8C5ALA1 | Integrin beta OS=Gadus morhua OX=8049 GN=itgb6 PE=3 SV=1                                                                | 4  | 2 | 3 | 2 | 806  | 87    | 5.02  | 6.69 | 2 | 1 |
| -1.3E+18 | IsMasterProtein | A0A8C5AGE9 | Protein arginine N-methyltransferase 5 OS=Gadus morhua OX=8049 GN=prmt5 PE=3 SV=1                                       | 8  | 2 | 3 | 2 | 626  | 70.4  | 6.24  | 8.25 | 2 | 1 |
| -1.3E+18 | IsMasterProtein | A0A8C5BLI3 | Protein disulfide-isomerase OS=Gadus morhua OX=8049 GN=txndc5 PE=3 SV=1                                                 | 12 | 3 | 3 | 2 | 333  | 37.3  | 5.59  | 8.43 | 3 | 1 |
| -1.3E+18 | IsMasterProtein | A0A8C5AS95 | Tumor protein p53 binding protein, 2a OS=Gadus morhua OX=8049 GN=tp53bp2a PE=4 SV=1                                     | 2  | 2 | 3 | 2 | 1131 | 125   | 7.33  | 6.76 | 2 | 1 |
| -1.2E+18 | IsMasterProtein | A0A8C5AU49 | BCR activator of RhoGEF and GTPase OS=Gadus morhua OX=8049 GN=bcr PE=4 SV=1                                             | 3  | 2 | 2 | 2 | 1385 | 154   | 7.62  | 5.46 | 2 | 1 |
| -1.2E+18 | IsMasterProtein | A0A8C4ZKU9 | A disintegrin and metalloproteinase with thrombospondin motifs 7-like OS=Gadus morhua OX=8049 GN=LOC115558321 PE=4 SV=1 | 3  | 2 | 2 | 2 | 1532 | 169.7 | 6.51  | 4.23 | 2 | 1 |
| -1.2E+18 | IsMasterProtein | A0A8C5CTZ9 | UDENN domain-containing protein OS=Gadus morhua OX=8049 PE=4 SV=1                                                       | 7  | 2 | 2 | 2 | 833  | 93.1  | 9.1   | 6.49 | 2 | 1 |
| -1.2E+18 | IsMasterProtein | A0A8C5CWH2 | Ribonuclease H OS=Gadus morhua OX=8049 PE=3 SV=1                                                                        | 6  | 2 | 2 | 2 | 671  | 76.6  | 8.35  | 4.94 | 2 | 1 |
| -1.2E+18 | IsMasterProtein | A0A8C5BVB4 | DUF676 domain-containing protein OS=Gadus morhua OX=8049 PE=3 SV=1                                                      | 4  | 2 | 2 | 2 | 1322 | 144.2 | 6.32  | 5.56 | 2 | 1 |
| -1.2E+18 | IsMasterProtein | A0A8C5F8Q2 | Diacylglycerol kinase OS=Gadus morhua OX=8049 GN=DGKD PE=3 SV=1                                                         | 5  | 2 | 2 | 2 | 1150 | 127.9 | 7.9   | 6.42 | 2 | 1 |
| -1.1E+18 | IsMasterProtein | A0A8C5C7M4 | Non-specific serine/threonine protein kinase OS=Gadus morhua OX=8049 PE=3 SV=1                                          | 5  | 2 | 2 | 2 | 1378 | 152.6 | 7.72  | 6.37 | 2 | 1 |
| -1.1E+18 | IsMasterProtein | A0A8C5BWM2 | Uncharacterized protein OS=Gadus morhua OX=8049 PE=4 SV=1                                                               | 39 | 2 | 2 | 2 | 117  | 12.5  | 9.72  | 5.31 | 2 | 1 |
| -1.1E+18 | IsMasterProtein | A0A8C4ZR39 | DNA polymerase subunit gamma-2, mitochondrial OS=Gadus morhua OX=8049 GN=polg2 PE=4 SV=1                                | 8  | 2 | 3 | 2 | 447  | 50.7  | 8.25  | 7.8  | 2 | 1 |
| -1.1E+18 | IsMasterProtein | A0A8C5FWJ0 | EPS8 like 2 OS=Gadus morhua OX=8049 GN=eps8l2 PE=3 SV=1                                                                 | 7  | 2 | 2 | 2 | 689  | 77.3  | 7.72  | 5.08 | 2 | 1 |
| -1.1E+18 | IsMasterProtein | A0A8C5C6M0 | Diaphanous related formin 3 OS=Gadus morhua OX=8049 GN=diaph3 PE=3 SV=1                                                 | 4  | 2 | 2 | 2 | 1019 | 115   | 6.29  | 4.87 | 2 | 1 |
| -1.1E+18 | IsMasterProtein | A0A8C5C512 | RNA helicase OS=Gadus morhua OX=8049 PE=3 SV=1                                                                          | 4  | 2 | 2 | 2 | 1126 | 125.7 | 6.8   | 6.05 | 2 | 1 |
| -1E+18   | IsMasterProtein | A0A8C5AJN1 | FAT atypical cadherin 3b OS=Gadus morhua OX=8049 PE=4 SV=1                                                              | 1  | 2 | 2 | 2 | 4115 | 446.4 | 4.74  | 5.1  | 2 | 1 |

|          |                 |            |                                                                                                      |    |   |   |   |      |       |       |       |   |   |
|----------|-----------------|------------|------------------------------------------------------------------------------------------------------|----|---|---|---|------|-------|-------|-------|---|---|
| -1E+18   | IsMasterProtein | A0A8C5F7D7 | NHL repeat containing 3 OS=Gadus morhua OX=8049 GN=nhlrc3 PE=4 SV=1                                  | 12 | 2 | 2 | 2 | 353  | 38.8  | 6.8   | 5.29  | 2 | 1 |
| -1E+18   | IsMasterProtein | A0A8C5A1R9 | RNA helicase OS=Gadus morhua OX=8049 GN=cif4a2 PE=3 SV=1                                             | 13 | 5 | 7 | 2 | 411  | 47.5  | 7.8   | 21.03 | 5 | 1 |
| -1E+18   | IsMasterProtein | A0A8C5BT27 | Protein kinase C and casein kinase substrate in neurons protein 1 OS=Gadus morhua OX=8049 PE=4 SV=1  | 6  | 2 | 2 | 2 | 440  | 50    | 6.07  | 5.58  | 2 | 1 |
| -1E+18   | IsMasterProtein | A0A8C5AJB0 | Liprin-alpha-3-like OS=Gadus morhua OX=8049 GN=LOC115531422 PE=3 SV=1                                | 5  | 2 | 2 | 2 | 1234 | 138.2 | 6.02  | 5.71  | 2 | 1 |
| -9.9E+17 | IsMasterProtein | A0A8C5D4K2 | AT rich interactive domain 1Ab (SWI-like) OS=Gadus morhua OX=8049 GN=arid1ab PE=4 SV=1               | 5  | 5 | 5 | 2 | 2102 | 225.1 | 7.83  | 13.6  | 5 | 1 |
| -9.9E+17 | IsMasterProtein | A0A8C5AE17 | Uncharacterized protein OS=Gadus morhua OX=8049 PE=4 SV=1                                            | 12 | 2 | 2 | 2 | 296  | 32.1  | 9.32  | 5.04  | 2 | 1 |
| -9.7E+17 | IsMasterProtein | A0A8C5ARE4 | Coiled-coil domain-containing protein 181 OS=Gadus morhua OX=8049 PE=3 SV=1                          | 8  | 2 | 2 | 2 | 512  | 58.4  | 8.06  | 5.68  | 2 | 1 |
| -9.5E+17 | IsMasterProtein | A0A8C5F9B7 | AP-1 complex subunit mu-2 OS=Gadus morhua OX=8049 GN=ap1m2 PE=3 SV=1                                 | 4  | 2 | 2 | 2 | 437  | 49.6  | 6.81  | 4.51  | 2 | 1 |
| -9.3E+17 | IsMasterProtein | A0A8C4ZWQ7 | Euchromatic histone-lysine N-methyltransferase 1b OS=Gadus morhua OX=8049 GN=eht1b PE=4 SV=1         | 4  | 2 | 2 | 2 | 1000 | 111.4 | 7.42  | 5.4   | 2 | 1 |
| -9.3E+17 | IsMasterProtein | A0A8C4ZFD4 | Sex comb on midleg-like protein 2 OS=Gadus morhua OX=8049 GN=LOC11555339 PE=3 SV=1                   | 5  | 2 | 3 | 2 | 683  | 73.8  | 9.63  | 7.61  | 2 | 1 |
| -9.2E+17 | IsMasterProtein | A0A8C5AAK8 | CCR4-NOT transcription complex, subunit 3a OS=Gadus morhua OX=8049 GN=cnct3a PE=3 SV=1               | 3  | 2 | 3 | 2 | 971  | 103.7 | 6.4   | 6.77  | 2 | 1 |
| -8.9E+17 | IsMasterProtein | A0A8C5AU26 | Vacuolar protein sorting-associated protein 53 homolog OS=Gadus morhua OX=8049 GN=vps53 PE=3 SV=1    | 5  | 2 | 2 | 2 | 807  | 91.2  | 6.64  | 5.88  | 2 | 1 |
| -8.9E+17 | IsMasterProtein | A0A8C5BAH0 | Uncharacterized protein OS=Gadus morhua OX=8049 PE=3 SV=1                                            | 11 | 4 | 4 | 2 | 440  | 49.7  | 6.19  | 12.01 | 4 | 1 |
| -8.8E+17 | IsMasterProtein | A0A8C5CUC5 | Rho-associated protein kinase 2 OS=Gadus morhua OX=8049 GN=LOC115534124 PE=3 SV=1                    | 2  | 2 | 2 | 2 | 1317 | 151.8 | 5.86  | 4.8   | 2 | 1 |
| -8.7E+17 | IsMasterProtein | A0A8C5ACQ3 | 60S ribosomal protein L35 OS=Gadus morhua OX=8049 GN=RPL35 PE=3 SV=1                                 | 18 | 2 | 2 | 2 | 119  | 13.9  | 10.89 | 5.72  | 2 | 1 |
| -8.5E+17 | IsMasterProtein | A0A8C5BZ11 | Uncharacterized protein OS=Gadus morhua OX=8049 PE=4 SV=1                                            | 5  | 2 | 2 | 2 | 851  | 95.2  | 6.48  | 6.21  | 2 | 1 |
| -8.3E+17 | IsMasterProtein | A0A8C5CH55 | Forkhead box P3b OS=Gadus morhua OX=8049 GN=foxp3b PE=4 SV=1                                         | 14 | 2 | 2 | 2 | 414  | 46.3  | 8.9   | 6.2   | 2 | 1 |
| -8.1E+17 | IsMasterProtein | A0A8C5BEV8 | Transforming, acidic coiled-coil containing protein 2 OS=Gadus morhua OX=8049 GN=tacc2 PE=3 SV=1     | 1  | 2 | 3 | 2 | 3820 | 408.9 | 4.78  | 8.67  | 2 | 1 |
| -7.9E+17 | IsMasterProtein | A0A8C5BYR4 | Uncharacterized protein OS=Gadus morhua OX=8049 PE=4 SV=1                                            | 1  | 2 | 3 | 2 | 1854 | 208.9 | 5.03  | 6.5   | 2 | 1 |
| -7.9E+17 | IsMasterProtein | A0A8C4Z2R9 | Putative methyltransferase DDB_G0268948 OS=Gadus morhua OX=8049 GN=LOC115533100 PE=4 SV=1            | 16 | 2 | 2 | 2 | 274  | 30.8  | 7.62  | 6.2   | 2 | 1 |
| -7.6E+17 | IsMasterProtein | A0A8C4YWV2 | Coiled-coil domain containing 90B OS=Gadus morhua OX=8049 GN=ccdc90b PE=3 SV=1                       | 11 | 2 | 2 | 2 | 224  | 25.6  | 6.32  | 5.07  | 2 | 1 |
| -7.5E+17 | IsMasterProtein | A0A8C5FEB9 | Ubiquitin carboxyl-terminal hydrolase OS=Gadus morhua OX=8049 PE=3 SV=1                              | 6  | 2 | 2 | 2 | 590  | 66.3  | 6.39  | 5.18  | 2 | 1 |
| -7.5E+17 | IsMasterProtein | A0A8C4Z2I3 | 60S ribosomal protein L38 OS=Gadus morhua OX=8049 GN=rpl38 PE=3 SV=1                                 | 19 | 2 | 2 | 2 | 69   | 8.2   | 10.36 | 6.32  | 2 | 1 |
| -7.3E+17 | IsMasterProtein | A0A8C4ZAY4 | TAP binding protein like OS=Gadus morhua OX=8049 GN=tapbpl PE=4 SV=1                                 | 12 | 2 | 2 | 2 | 449  | 48.6  | 5.07  | 5.81  | 2 | 1 |
| -7.2E+17 | IsMasterProtein | A0A8C5FL83 | Leucine zipper-EF-hand containing transmembrane protein 2 OS=Gadus morhua OX=8049 GN=letm2 PE=4 SV=1 | 5  | 2 | 2 | 2 | 518  | 57.6  | 9.58  | 4.55  | 2 | 1 |
| -7.1E+17 | IsMasterProtein | A0A8C5BMI4 | EWS RNA binding protein 1 OS=Gadus morhua OX=8049 GN=ewsr1 PE=3 SV=1                                 | 5  | 2 | 2 | 2 | 604  | 63.1  | 9.47  | 5.06  | 2 | 1 |
| -6.8E+17 | IsMasterProtein | A0A8C5APJ7 | Ribonuclease H OS=Gadus morhua OX=8049 PE=3 SV=1                                                     | 4  | 2 | 4 | 2 | 907  | 99.1  | 9.76  | 9.74  | 2 | 1 |
| -6.5E+17 | IsMasterProtein | A0A8C5CNC4 | Otoancorin OS=Gadus morhua OX=8049 GN=otoa PE=4 SV=1                                                 | 4  | 2 | 2 | 2 | 1102 | 122   | 8.7   | 6.04  | 2 | 1 |
| -6.4E+17 | IsMasterProtein | A0A8C5B2P0 | Pyruvate kinase OS=Gadus morhua OX=8049 PE=3 SV=1                                                    | 6  | 4 | 4 | 2 | 473  | 52.6  | 9.26  | 10.05 | 4 | 1 |
| -6.4E+17 | IsMasterProtein | A0A8C5C4U9 | E3 ubiquitin-protein ligase OS=Gadus morhua OX=8049 PE=3 SV=1                                        | 7  | 2 | 2 | 2 | 780  | 86.1  | 5.68  | 4.66  | 2 | 1 |
| -6.3E+17 | IsMasterProtein | A0A8C5D905 | Nuclear receptor subfamily 2, group F, member 6a OS=Gadus morhua OX=8049 GN=nr2f6a PE=3 SV=1         | 17 | 2 | 2 | 2 | 413  | 44.9  | 7.06  | 6.25  | 2 | 1 |
| -6.2E+17 | IsMasterProtein | A0A8C5FKB7 | EGF containing fibulin extracellular matrix protein 1 OS=Gadus morhua OX=8049 GN=efemp1 PE=4 SV=1    | 7  | 2 | 2 | 2 | 410  | 45.8  | 5.5   | 5.58  | 2 | 1 |
| -6E+17   | IsMasterProtein | A0A8C5AER2 | ENT domain-containing protein OS=Gadus morhua OX=8049 PE=4 SV=1                                      | 3  | 2 | 2 | 2 | 1045 | 109.1 | 9.51  | 4.3   | 2 | 1 |

|          |                 |            |                                                                                                                                   |    |    |    |   |      |       |      |       |    |   |
|----------|-----------------|------------|-----------------------------------------------------------------------------------------------------------------------------------|----|----|----|---|------|-------|------|-------|----|---|
| -6E+17   | IsMasterProtein | A0A8C5AX37 | M-phase phosphoprotein 9 OS=Gadus morhua OX=8049 GN=MPHOSPH9 PE=4 SV=1                                                            | 2  | 2  | 2  | 2 | 1308 | 142   | 8    | 4.7   | 2  | 1 |
| -5.9E+17 | IsMasterProtein | A0A8C5A8H9 | Uncharacterized protein OS=Gadus morhua OX=8049 PE=4 SV=1                                                                         | 6  | 2  | 2  | 2 | 571  | 61.3  | 8.81 | 5.64  | 2  | 1 |
| -5.9E+17 | IsMasterProtein | A0A8C4ZSX4 | TBC1 domain family member 24-like OS=Gadus morhua OX=8049 GN=LOC115541032 PE=4 SV=1                                               | 5  | 2  | 2  | 2 | 751  | 84.5  | 7.5  | 5.08  | 2  | 1 |
| -5.8E+17 | IsMasterProtein | A0A8C4Z2F2 | Sperm tail PG-rich repeat containing 2 OS=Gadus morhua OX=8049 GN=STPG2 PE=4 SV=1                                                 | 5  | 2  | 2  | 2 | 540  | 59.1  | 9.47 | 5.74  | 2  | 1 |
| -5.7E+17 | IsMasterProtein | A0A8C5F4X6 | Arginine--tRNA ligase OS=Gadus morhua OX=8049 GN=RARS2 PE=3 SV=1                                                                  | 6  | 2  | 2  | 2 | 579  | 65.4  | 7.36 | 4.76  | 2  | 1 |
| -5.4E+17 | IsMasterProtein | A0A8C5C6V4 | Lysine (K)-specific demethylase 2Ab OS=Gadus morhua OX=8049 GN=kdm2ab PE=3 SV=1                                                   | 3  | 2  | 2  | 2 | 1192 | 133.3 | 7.91 | 5.54  | 2  | 1 |
| -5.3E+17 | IsMasterProtein | A0A8C5BDE7 | Proline rich 12b OS=Gadus morhua OX=8049 PE=4 SV=1                                                                                | 1  | 2  | 2  | 2 | 2312 | 246.5 | 6.74 | 4.63  | 2  | 1 |
| -5.1E+17 | IsMasterProtein | A0A8C5CZ33 | Phosphatidylinositol 4-phosphate 5-kinase type-1 alpha-like OS=Gadus morhua OX=8049 GN=PIP5K1A PE=4 SV=1                          | 8  | 2  | 2  | 2 | 602  | 65.6  | 8.41 | 6.48  | 2  | 1 |
| -5E+17   | IsMasterProtein | A0A8C5FCP2 | Hexosyltransferase OS=Gadus morhua OX=8049 PE=3 SV=1                                                                              | 8  | 2  | 3  | 2 | 423  | 49.3  | 8.98 | 8.77  | 2  | 1 |
| -5E+17   | IsMasterProtein | A0A8C5AFH0 | Ral guanine nucleotide dissociation stimulator-like OS=Gadus morhua OX=8049 GN=LOC115545407 PE=4 SV=1                             | 4  | 2  | 2  | 2 | 790  | 88.6  | 7.56 | 4.63  | 2  | 1 |
| -4.9E+17 | IsMasterProtein | A0A8C4ZUJ5 | Aminoacyl-tRNA hydrolase OS=Gadus morhua OX=8049 GN=ptrh2 PE=4 SV=1                                                               | 28 | 2  | 2  | 2 | 172  | 18.3  | 8.79 | 4.72  | 2  | 1 |
| -4.6E+17 | IsMasterProtein | A0A8C5C0D4 | ATP-citrate synthase OS=Gadus morhua OX=8049 PE=3 SV=1                                                                            | 9  | 7  | 9  | 2 | 1094 | 119.4 | 7.75 | 24.76 | 7  | 1 |
| -4.6E+17 | IsMasterProtein | A0A8C5BDR2 | Mediator of RNA polymerase II transcription subunit 26 OS=Gadus morhua OX=8049 GN=med26 PE=3 SV=1                                 | 3  | 2  | 2  | 2 | 636  | 67.7  | 9.38 | 5.16  | 2  | 1 |
| -4.5E+17 | IsMasterProtein | A0A8C5C9T8 | Cadherin, EGF LAG seven-pass G-type receptor 2 OS=Gadus morhua OX=8049 PE=3 SV=1                                                  | 2  | 2  | 2  | 2 | 2903 | 319.7 | 5.86 | 6.17  | 2  | 1 |
| -4.3E+17 | IsMasterProtein | A0A8C5BRF1 | Calcium uptake protein 3, mitochondrial-like OS=Gadus morhua OX=8049 GN=LOC115552024 PE=4 SV=1                                    | 8  | 2  | 2  | 2 | 504  | 57.6  | 8.59 | 6.02  | 2  | 1 |
| -3.5E+17 | IsMasterProtein | A0A8C4Z165 | Centrosomal protein 152 OS=Gadus morhua OX=8049 PE=4 SV=1                                                                         | 3  | 2  | 2  | 2 | 1565 | 175.7 | 6.33 | 5.55  | 2  | 1 |
| -3.5E+17 | IsMasterProtein | A0A8C5CBJ8 | WD repeat domain 47a OS=Gadus morhua OX=8049 GN=wdr47a PE=4 SV=1                                                                  | 5  | 2  | 2  | 2 | 899  | 97.7  | 5.62 | 4.99  | 2  | 1 |
| -3.3E+17 | IsMasterProtein | A0A8C5AMS0 | Programmed cell death 6 interacting protein OS=Gadus morhua OX=8049 PE=4 SV=1                                                     | 36 | 25 | 29 | 2 | 904  | 100.1 | 8.21 | 85.84 | 25 | 1 |
| -3.2E+17 | IsMasterProtein | A0A8C4ZXG5 | Proteasome subunit alpha type OS=Gadus morhua OX=8049 GN=psma4 PE=3 SV=1                                                          | 7  | 2  | 2  | 2 | 261  | 29.3  | 7.66 | 4.82  | 2  | 1 |
| -3.2E+17 | IsMasterProtein | A0A8C4ZHE7 | Uncharacterized protein OS=Gadus morhua OX=8049 PE=3 SV=1                                                                         | 14 | 2  | 2  | 2 | 389  | 43.4  | 7.78 | 6.08  | 2  | 1 |
| -2.4E+17 | IsMasterProtein | A0A8C5FDJ3 | Probable G-protein coupled receptor 158 OS=Gadus morhua OX=8049 GN=LOC115549367 PE=3 SV=1                                         | 2  | 2  | 2  | 2 | 1367 | 149.7 | 9.26 | 4.65  | 2  | 1 |
| -2.4E+17 | IsMasterProtein | A0A8C4YWC9 | Misshapen-like kinase 1 OS=Gadus morhua OX=8049 GN=si:zfoss-2326c3.2 PE=4 SV=1                                                    | 3  | 2  | 3  | 2 | 1227 | 138.8 | 9.07 | 7.73  | 2  | 1 |
| -2.3E+17 | IsMasterProtein | A0A8C5C8H1 | SERPIN domain-containing protein OS=Gadus morhua OX=8049 PE=3 SV=1                                                                | 8  | 2  | 2  | 2 | 466  | 50.5  | 5.08 | 5.41  | 2  | 1 |
| -2E+17   | IsMasterProtein | A0A8C5AIP5 | Nascent polypeptide-associated complex subunit alpha, muscle-specific form-like OS=Gadus morhua OX=8049 GN=LOC115544547 PE=4 SV=1 | 3  | 2  | 3  | 2 | 1754 | 186.5 | 8.16 | 7.96  | 2  | 1 |
| -1.9E+17 | IsMasterProtein | A0A8C4Z5N2 | Uncharacterized protein OS=Gadus morhua OX=8049 PE=3 SV=1                                                                         | 4  | 2  | 2  | 2 | 1207 | 133.1 | 7.49 | 5.06  | 2  | 1 |
| -1.7E+17 | IsMasterProtein | A0A8C5C7H9 | DLG associated protein 2 OS=Gadus morhua OX=8049 PE=3 SV=1                                                                        | 3  | 2  | 3  | 2 | 1481 | 160.3 | 5.36 | 8.2   | 2  | 1 |
| -1.6E+17 | IsMasterProtein | A0A8C5BDB7 | VPS50 EARP/GARPII complex subunit OS=Gadus morhua OX=8049 GN=vps50 PE=4 SV=1                                                      | 4  | 2  | 2  | 2 | 925  | 105.9 | 5.8  | 5.28  | 2  | 1 |
| -1.6E+17 | IsMasterProtein | A0A8C4ZT15 | Chromodomain protein, Y-like OS=Gadus morhua OX=8049 GN=CDYL PE=4 SV=1                                                            | 9  | 2  | 2  | 2 | 602  | 65.4  | 9.35 | 5.68  | 2  | 1 |
| -1.5E+17 | IsMasterProtein | A0A8C5BR36 | Rho guanine nucleotide exchange factor (GEF) 10-like a OS=Gadus morhua OX=8049 PE=4 SV=1                                          | 6  | 2  | 2  | 2 | 1063 | 114   | 8.22 | 5.02  | 2  | 1 |
| -1.5E+17 | IsMasterProtein | A0A8C5BJD1 | Integrase catalytic domain-containing protein OS=Gadus morhua OX=8049 PE=4 SV=1                                                   | 5  | 2  | 2  | 2 | 631  | 68.8  | 8.05 | 4.53  | 2  | 1 |
| -1.5E+17 | IsMasterProtein | A0A8C5AV48 | YTH N(6)-methyladenosine RNA binding protein 2 OS=Gadus morhua OX=8049 PE=4 SV=1                                                  | 9  | 2  | 2  | 2 | 442  | 46.3  | 8.81 | 4.56  | 2  | 1 |
| -1.5E+17 | IsMasterProtein | A0A8C5FL27 | Receptor-interacting serine-threonine kinase 4 OS=Gadus morhua OX=8049 GN=RIPK4 PE=4 SV=1                                         | 3  | 2  | 2  | 2 | 889  | 97.5  | 6.47 | 4.91  | 2  | 1 |
| -1.4E+17 | IsMasterProtein | A0A8C5A1V5 | Slit homolog 3 (Drosophila) OS=Gadus morhua OX=8049 GN=slit3 PE=4 SV=1                                                            | 2  | 2  | 3  | 2 | 1528 | 167.5 | 7.65 | 7.04  | 2  | 1 |



|          |                 |            |                                                                                                            |    |   |   |   |      |       |       |       |   |   |
|----------|-----------------|------------|------------------------------------------------------------------------------------------------------------|----|---|---|---|------|-------|-------|-------|---|---|
| -9.5E+16 | IsMasterProtein | A0A8C5AHN7 | Cyclin and CBS domain divalent metal cation transport mediator 1 OS=Gadus morhua OX=8049 GN=CNM1 PE=3 SV=1 | 6  | 3 | 3 | 2 | 902  | 100.8 | 7.28  | 8.08  | 3 | 1 |
| -8.2E+16 | IsMasterProtein | A0A8C4ZBB5 | KRAS proto-oncogene, GTPase OS=Gadus morhua OX=8049 GN=kras PE=4 SV=1                                      | 17 | 2 | 2 | 2 | 189  | 21.7  | 6.9   | 4.91  | 2 | 1 |
| -5.9E+16 | IsMasterProtein | A0A8C5CQW0 | Tropomyosin 3 OS=Gadus morhua OX=8049 GN=tpm3 PE=3 SV=1                                                    | 18 | 5 | 5 | 2 | 247  | 28.6  | 4.68  | 13.44 | 5 | 1 |
| -5.6E+16 | IsMasterProtein | A0A8C5AYK7 | SCA7 domain-containing protein OS=Gadus morhua OX=8049 PE=4 SV=1                                           | 5  | 2 | 3 | 2 | 671  | 68.2  | 10.67 | 6.68  | 2 | 1 |
| -5.3E+16 | IsMasterProtein | A0A8C4ZTH4 | Hydroxyacyl-CoA dehydrogenase OS=Gadus morhua OX=8049 PE=3 SV=1                                            | 17 | 2 | 2 | 2 | 313  | 33.8  | 7.97  | 8.76  | 2 | 1 |
| -3.1E+16 | IsMasterProtein | A0A8C5C2Y5 | Sodium leak channel, non-selective OS=Gadus morhua OX=8049 GN=nalcn PE=4 SV=1                              | 2  | 2 | 2 | 2 | 1687 | 194.6 | 9.03  | 5.27  | 2 | 1 |
| -1.4E+16 | IsMasterProtein | A0A8C5FBE5 | Uncharacterized protein OS=Gadus morhua OX=8049 PE=4 SV=1                                                  | 6  | 2 | 2 | 2 | 957  | 107.5 | 5.4   | 6.57  | 2 | 1 |
| 2E+16    | IsMasterProtein | A0A8C4Z8L3 | RNA helicase OS=Gadus morhua OX=8049 GN=dhx30 PE=4 SV=1                                                    | 4  | 2 | 3 | 2 | 1155 | 126.7 | 7.05  | 8.15  | 2 | 1 |
| 3.82E+16 | IsMasterProtein | A0A8C5FNX6 | Ubiquitin carboxyl-terminal hydrolase OS=Gadus morhua OX=8049 GN=usp33 PE=3 SV=1                           | 7  | 2 | 3 | 2 | 908  | 101   | 6.09  | 5.73  | 2 | 1 |
| 4.26E+16 | IsMasterProtein | A0A8C5CII1 | ERBB receptor feedback inhibitor 1a OS=Gadus morhua OX=8049 PE=4 SV=1                                      | 7  | 2 | 2 | 2 | 407  | 45.3  | 9.52  | 4.83  | 2 | 1 |
| 5.19E+16 | IsMasterProtein | A0A8C5BIS1 | HIT domain-containing protein OS=Gadus morhua OX=8049 PE=3 SV=1                                            | 17 | 2 | 2 | 2 | 252  | 27.5  | 8.4   | 5.28  | 2 | 1 |
| 6.4E+16  | IsMasterProtein | A0A8C4ZC93 | Pleckstrin homology-like domain, family B, member 1b OS=Gadus morhua OX=8049 PE=4 SV=1                     | 4  | 2 | 2 | 2 | 604  | 69.8  | 6.04  | 4.28  | 2 | 1 |
| 8.32E+16 | IsMasterProtein | A0A8C5CS97 | BMP2 inducible kinase OS=Gadus morhua OX=8049 GN=bmp2k PE=4 SV=1                                           | 5  | 2 | 2 | 2 | 1272 | 140.1 | 5.38  | 5.42  | 2 | 1 |
| 8.48E+16 | IsMasterProtein | A0A8C5D0R1 | Cytospin-A OS=Gadus morhua OX=8049 GN=spec11a PE=3 SV=1                                                    | 3  | 2 | 2 | 2 | 1082 | 119.2 | 5.64  | 4.8   | 2 | 1 |
| 8.7E+16  | IsMasterProtein | A0A8C4ZF08 | Uncharacterized protein OS=Gadus morhua OX=8049 PE=3 SV=1                                                  | 7  | 2 | 2 | 2 | 325  | 35.5  | 5.3   | 5.39  | 2 | 1 |
| 1.12E+17 | IsMasterProtein | A0A8C4Z8Q3 | Complement component C9 OS=Gadus morhua OX=8049 PE=3 SV=1                                                  | 3  | 2 | 2 | 2 | 574  | 63.9  | 6.13  | 5.51  | 2 | 1 |
| 1.17E+17 | IsMasterProtein | A0A8C5A835 | Intraflagellar transport 172 OS=Gadus morhua OX=8049 GN=ift172 PE=4 SV=1                                   | 3  | 2 | 3 | 2 | 1714 | 192.4 | 5.82  | 9.16  | 2 | 1 |
| 1.26E+17 | IsMasterProtein | A0A8C4ZWY5 | SCAN box domain-containing protein OS=Gadus morhua OX=8049 PE=4 SV=1                                       | 16 | 2 | 2 | 2 | 200  | 22.2  | 10.64 | 4.43  | 2 | 1 |
| 1.33E+17 | IsMasterProtein | A0A8C5BZ12 | [Histone H3]-trimethyl-L-lysine(9) demethylase OS=Gadus morhua OX=8049 GN=kdm4aa PE=3 SV=1                 | 9  | 3 | 3 | 2 | 825  | 94    | 7.66  | 8.49  | 3 | 1 |
| 1.4E+17  | IsMasterProtein | A0A8C5BBV0 | Zinc finger protein 536 OS=Gadus morhua OX=8049 PE=4 SV=1                                                  | 8  | 2 | 2 | 2 | 842  | 92.9  | 8.28  | 5.26  | 2 | 1 |
| 1.88E+17 | IsMasterProtein | A0A8C5F5Y1 | Segment polarity protein dishevelled homolog DVL-3-like OS=Gadus morhua OX=8049 GN=LOC115549663 PE=3 SV=1  | 6  | 2 | 2 | 2 | 695  | 75.4  | 6.86  | 5.61  | 2 | 1 |
| 2E+17    | IsMasterProtein | A0A8C4ZPT6 | ATP synthase subunit OS=Gadus morhua OX=8049 GN=atp51 PE=3 SV=1                                            | 22 | 2 | 2 | 2 | 103  | 11    | 9.36  | 4.2   | 2 | 1 |
| 2.04E+17 | IsMasterProtein | A0A8C5D1D0 | Centriole, cilia and spindle-associated protein a OS=Gadus morhua OX=8049 PE=4 SV=1                        | 15 | 2 | 2 | 2 | 198  | 23    | 9.73  | 5.17  | 2 | 1 |
| 2.09E+17 | IsMasterProtein | A0A8C4YYX7 | DNA helicase OS=Gadus morhua OX=8049 GN=chd2 PE=4 SV=1                                                     | 2  | 2 | 3 | 2 | 1767 | 201.7 | 7.37  | 6.89  | 2 | 1 |
| 2.18E+17 | IsMasterProtein | A0A8C5FFT2 | Uncharacterized protein OS=Gadus morhua OX=8049 PE=4 SV=1                                                  | 4  | 2 | 2 | 2 | 595  | 67.4  | 8.28  | 4.51  | 2 | 1 |
| 2.29E+17 | IsMasterProtein | A0A8C4ZNV3 | Retinoic acid induced 14 OS=Gadus morhua OX=8049 GN=rai14 PE=4 SV=1                                        | 3  | 2 | 2 | 2 | 1030 | 113.4 | 5.3   | 4.78  | 2 | 1 |
| 2.31E+17 | IsMasterProtein | A0A8C5C3X9 | Bromodomain-containing protein 1-like OS=Gadus morhua OX=8049 GN=LOC115532102 PE=4 SV=1                    | 2  | 2 | 2 | 2 | 1610 | 179.7 | 8.4   | 5.58  | 2 | 1 |
| 2.33E+17 | IsMasterProtein | A0A8C4ZCR4 | Pre-B-cell leukemia transcription factor 1-like OS=Gadus morhua OX=8049 GN=LOC115539909 PE=3 SV=1          | 13 | 2 | 2 | 2 | 343  | 38    | 7.77  | 6.11  | 2 | 1 |
| 2.54E+17 | IsMasterProtein | A0A8C5FP91 | THAP-type domain-containing protein OS=Gadus morhua OX=8049 PE=4 SV=1                                      | 8  | 2 | 2 | 2 | 465  | 52.4  | 6.74  | 5.69  | 2 | 1 |
| 2.66E+17 | IsMasterProtein | A0A8C5FNI2 | FAT atypical cadherin 4 OS=Gadus morhua OX=8049 GN=FAT4 PE=4 SV=1                                          | 1  | 2 | 2 | 2 | 4589 | 499.8 | 5.21  | 5.87  | 2 | 1 |
| 2.82E+17 | IsMasterProtein | A0A8C4YZX5 | Coactosin-like F-actin binding protein 1 OS=Gadus morhua OX=8049 GN=cot11 PE=4 SV=1                        | 13 | 2 | 2 | 2 | 142  | 16.2  | 5.1   | 4.38  | 2 | 1 |
| 2.84E+17 | IsMasterProtein | A0A8C4Z2B0 | Lysine (K)-specific demethylase 6B, a OS=Gadus morhua OX=8049 PE=4 SV=1                                    | 2  | 2 | 2 | 2 | 1807 | 202.2 | 7.83  | 5.41  | 2 | 1 |
| 3.11E+17 | IsMasterProtein | A0A8C5CXC3 | Nuclear VCP like OS=Gadus morhua OX=8049 GN=si:ch211-195b21.5 PE=4 SV=1                                    | 3  | 2 | 2 | 2 | 953  | 103.4 | 5.27  | 5.26  | 2 | 1 |
| 3.42E+17 | IsMasterProtein | A0A8C4ZDG6 | Transglutaminase 2b OS=Gadus morhua OX=8049 GN=tgm2b PE=4 SV=1                                             | 2  | 2 | 2 | 2 | 1679 | 187.8 | 7.72  | 4.76  | 2 | 1 |
| 3.51E+17 | IsMasterProtein | A0A8C5BVV2 | Adenylate cyclase 8 (brain) OS=Gadus morhua OX=8049 PE=3 SV=1                                              | 6  | 2 | 2 | 2 | 649  | 72.2  | 7.27  | 6.87  | 2 | 1 |
| 3.61E+17 | IsMasterProtein | A0A8C5FDE4 | Mitogen-activated protein kinase kinase kinase OS=Gadus morhua OX=8049 PE=3 SV=1                           | 4  | 2 | 2 | 2 | 1283 | 144.9 | 6.67  | 5.39  | 2 | 1 |

|          |                 |            |                                                                                                            |    |   |   |   |      |       |      |       |   |   |
|----------|-----------------|------------|------------------------------------------------------------------------------------------------------------|----|---|---|---|------|-------|------|-------|---|---|
| 3.65E+17 | IsMasterProtein | A0A8C5A8T4 | Uncharacterized protein OS=Gadus morhua OX=8049 PE=4 SV=1                                                  | 3  | 2 | 2 | 2 | 920  | 98.2  | 7.77 | 5.32  | 2 | 1 |
| 3.98E+17 | IsMasterProtein | A0A8C5CFY4 | LRP chaperone MESD OS=Gadus morhua OX=8049 GN=mesd PE=3 SV=1                                               | 11 | 2 | 2 | 2 | 214  | 24.1  | 7.24 | 5.03  | 2 | 1 |
| 4.01E+17 | IsMasterProtein | A0A8C4ZVK6 | G protein-coupled receptor 137Ba OS=Gadus morhua OX=8049 GN=GPR137B PE=4 SV=1                              | 6  | 2 | 2 | 2 | 561  | 59.7  | 8.95 | 6.14  | 2 | 1 |
| 4.01E+17 | IsMasterProtein | A0A8C5AIZ3 | Uncharacterized protein OS=Gadus morhua OX=8049 PE=3 SV=1                                                  | 14 | 2 | 2 | 2 | 542  | 57.5  | 9.35 | 6.3   | 2 | 1 |
| 4.47E+17 | IsMasterProtein | A0A8C5C7E0 | Uncharacterized protein OS=Gadus morhua OX=8049 PE=4 SV=1                                                  | 15 | 2 | 3 | 2 | 269  | 27.9  | 7.59 | 8.72  | 2 | 1 |
| 4.75E+17 | IsMasterProtein | A0A8C4Z7X6 | Zgc:113436 OS=Gadus morhua OX=8049 PE=4 SV=1                                                               | 6  | 2 | 5 | 2 | 430  | 49    | 6.47 | 11.9  | 2 | 1 |
| 4.76E+17 | IsMasterProtein | A0A8C5FT01 | Tyrosine-protein kinase OS=Gadus morhua OX=8049 GN=lyn PE=3 SV=1                                           | 10 | 3 | 6 | 2 | 509  | 57.7  | 7.09 | 15.39 | 3 | 1 |
| 4.8E+17  | IsMasterProtein | A0A8C5F7M9 | Astrocytic phosphoprotein PEA-15 OS=Gadus morhua OX=8049 GN=pea15 PE=4 SV=1                                | 12 | 2 | 2 | 2 | 130  | 15    | 5.05 | 4.29  | 2 | 1 |
| 5.06E+17 | IsMasterProtein | A0A8C5BTX2 | Ubiquitin carboxyl-terminal hydrolase OS=Gadus morhua OX=8049 GN=usp20 PE=3 SV=1                           | 6  | 2 | 2 | 2 | 826  | 92    | 6.02 | 5.27  | 2 | 1 |
| 5.15E+17 | IsMasterProtein | A0A8C5FQ99 | Protein-tyrosine-phosphatase OS=Gadus morhua OX=8049 GN=PTPRZ1 PE=3 SV=1                                   | 1  | 2 | 2 | 2 | 1460 | 159.5 | 5.38 | 4.43  | 2 | 1 |
| 5.25E+17 | IsMasterProtein | A0A8C5AC11 | Myosin binding protein Hb OS=Gadus morhua OX=8049 GN=mybphb PE=4 SV=1                                      | 7  | 2 | 2 | 2 | 530  | 57.5  | 5.2  | 4.92  | 2 | 1 |
| 5.77E+17 | IsMasterProtein | A0A8C4YVF1 | Galectin OS=Gadus morhua OX=8049 PE=4 SV=1                                                                 | 7  | 2 | 3 | 2 | 341  | 34.2  | 5.06 | 9.31  | 2 | 1 |
| 6.02E+17 | IsMasterProtein | A0A8C4Z9T5 | BTB (POZ) domain containing 17a OS=Gadus morhua OX=8049 PE=4 SV=1                                          | 8  | 2 | 4 | 2 | 481  | 52.7  | 7.42 | 8.79  | 2 | 1 |
| 6.09E+17 | IsMasterProtein | A0A8C5CGM0 | Replication protein A subunit OS=Gadus morhua OX=8049 GN=tpa1 PE=3 SV=1                                    | 5  | 2 | 2 | 2 | 585  | 65.1  | 7.11 | 4.87  | 2 | 1 |
| 6.21E+17 | IsMasterProtein | A0A8C5BZY3 | Uncharacterized protein OS=Gadus morhua OX=8049 PE=4 SV=1                                                  | 10 | 2 | 2 | 2 | 560  | 61.7  | 6.25 | 5.43  | 2 | 1 |
| 6.29E+17 | IsMasterProtein | A0A8C4ZH14 | Capping protein regulator and myosin 1 linker 3 OS=Gadus morhua OX=8049 PE=3 SV=1                          | 3  | 2 | 2 | 2 | 1114 | 122.6 | 8.38 | 4.87  | 2 | 1 |
| 6.57E+17 | IsMasterProtein | A0A8C4ZSH7 | Ecdysoless homolog (Drosophila) OS=Gadus morhua OX=8049 GN=eecd PE=4 SV=1                                  | 6  | 2 | 2 | 2 | 666  | 74.4  | 4.83 | 5.56  | 2 | 1 |
| 6.73E+17 | IsMasterProtein | A0A8C5F908 | Proteasome subunit alpha type OS=Gadus morhua OX=8049 GN=psma5 PE=3 SV=1                                   | 13 | 2 | 2 | 2 | 242  | 26.7  | 5.2  | 5.98  | 2 | 1 |
| 6.85E+17 | IsMasterProtein | A0A8C5CP11 | Iroquois homeobox 4b OS=Gadus morhua OX=8049 PE=4 SV=1                                                     | 5  | 2 | 2 | 2 | 440  | 47.6  | 6.07 | 4.07  | 2 | 1 |
| 6.96E+17 | IsMasterProtein | A0A8C4ZIP4 | Chondroadherin OS=Gadus morhua OX=8049 GN=chad PE=4 SV=1                                                   | 11 | 2 | 2 | 2 | 370  | 41    | 9.23 | 6.19  | 2 | 1 |
| 7.23E+17 | IsMasterProtein | A0A8C5CFQ1 | Nup214_FG domain-containing protein OS=Gadus morhua OX=8049 PE=4 SV=1                                      | 2  | 2 | 2 | 2 | 1792 | 183.7 | 6.28 | 4.87  | 2 | 1 |
| 7.36E+17 | IsMasterProtein | A0A8C5ACN2 | Rac/Cdc42 guanine nucleotide exchange factor (GEF) 6 OS=Gadus morhua OX=8049 GN=arhgef6 PE=4 SV=1          | 6  | 2 | 2 | 2 | 703  | 78.4  | 6.2  | 5.44  | 2 | 1 |
| 7.84E+17 | IsMasterProtein | A0A8C5FCT8 | Phospholipid-transporting ATPase ABCA1-like OS=Gadus morhua OX=8049 GN=zgc:172302 PE=4 SV=1                | 3  | 2 | 3 | 2 | 2130 | 236.1 | 6.93 | 8.92  | 2 | 1 |
| 7.97E+17 | IsMasterProtein | A0A8C5F574 | Protein phosphatase, Mg2+/Mn2+ dependent, 1La OS=Gadus morhua OX=8049 GN=ppm1la PE=3 SV=1                  | 5  | 2 | 2 | 2 | 380  | 42.5  | 7.84 | 4.2   | 2 | 1 |
| 8E+17    | IsMasterProtein | A0A8C4ZPP9 | Helicase, lymphoid specific OS=Gadus morhua OX=8049 GN=hells PE=4 SV=1                                     | 3  | 2 | 2 | 2 | 870  | 99.5  | 8.4  | 5.79  | 2 | 1 |
| 8.06E+17 | IsMasterProtein | A0A8C5BZJ6 | SH3 and PX domains 2A OS=Gadus morhua OX=8049 GN=sh3pxd2a PE=3 SV=1                                        | 5  | 2 | 2 | 2 | 1142 | 125.1 | 8    | 5.59  | 2 | 1 |
| 8.15E+17 | IsMasterProtein | A0A8C5BBA2 | Mitogen-activated protein kinase kinase kinase 14a OS=Gadus morhua OX=8049 GN=map3k14a PE=4 SV=1           | 4  | 2 | 3 | 2 | 904  | 100.3 | 5.45 | 7.61  | 2 | 1 |
| 8.2E+17  | IsMasterProtein | A0A8C5CPI6 | Diacylglycerol kinase OS=Gadus morhua OX=8049 PE=3 SV=1                                                    | 3  | 2 | 2 | 2 | 829  | 91    | 8.46 | 6.49  | 2 | 1 |
| 8.39E+17 | IsMasterProtein | A0A8C5AX81 | Alpha-L-iduronidase OS=Gadus morhua OX=8049 GN=idua PE=3 SV=1                                              | 8  | 2 | 2 | 2 | 585  | 65.6  | 6.28 | 6.32  | 2 | 1 |
| 8.4E+17  | IsMasterProtein | A0A8C5ACI2 | Signal-induced proliferation-associated 1-like protein 2 OS=Gadus morhua OX=8049 GN=LOC115540071 PE=4 SV=1 | 3  | 2 | 2 | 2 | 1526 | 162.9 | 7.53 | 5.06  | 2 | 1 |
| 8.44E+17 | IsMasterProtein | Q95I60     | MHC class Ia antigen (Fragment) OS=Gadus morhua OX=8049 PE=2 SV=1                                          | 14 | 4 | 4 | 2 | 359  | 40.9  | 5.47 | 10.47 | 4 | 1 |
| 8.66E+17 | IsMasterProtein | A0A8C5AC30 | Serine/threonine-protein phosphatase OS=Gadus morhua OX=8049 GN=LOC115530967 PE=3 SV=1                     | 15 | 3 | 3 | 2 | 314  | 35.7  | 6.74 | 7.71  | 3 | 1 |
| 8.71E+17 | IsMasterProtein | A0A8C4YU82 | Separase OS=Gadus morhua OX=8049 PE=4 SV=1                                                                 | 2  | 2 | 2 | 2 | 1608 | 175.2 | 7.96 | 4.59  | 2 | 1 |
| 8.73E+17 | IsMasterProtein | A0A8C4ZZA9 | Tyrosine-protein kinase receptor OS=Gadus morhua OX=8049 PE=3 SV=1                                         | 6  | 2 | 2 | 2 | 1107 | 118.6 | 8.63 | 6.91  | 2 | 1 |
| 8.88E+17 | IsMasterProtein | A0A8C5F6N1 | C19h1orf109 homolog (H. sapiens) OS=Gadus morhua OX=8049 GN=c19h1orf109 PE=4 SV=1                          | 13 | 2 | 2 | 2 | 209  | 23.9  | 5.25 | 5.07  | 2 | 1 |

|          |                 |            |                                                                                                                  |    |   |   |   |      |       |      |       |   |   |
|----------|-----------------|------------|------------------------------------------------------------------------------------------------------------------|----|---|---|---|------|-------|------|-------|---|---|
| 9.22E+17 | IsMasterProtein | A0A8C5CHT0 | Vitrin OS=Gadus morhua OX=8049 GN=VIT PE=4 SV=1                                                                  | 6  | 2 | 2 | 2 | 775  | 84.9  | 9.04 | 5.62  | 2 | 1 |
| 9.33E+17 | IsMasterProtein | A0A8C4ZQ77 | ATP receptor OS=Gadus morhua OX=8049 GN=p2rx3a PE=3 SV=1                                                         | 11 | 2 | 2 | 2 | 326  | 36.8  | 7.37 | 4.65  | 2 | 1 |
| 9.33E+17 | IsMasterProtein | A0A8C4ZIC7 | TUB like protein 4a OS=Gadus morhua OX=8049 GN=tulp4a PE=3 SV=1                                                  | 4  | 2 | 2 | 2 | 1584 | 171.2 | 8    | 5.95  | 2 | 1 |
| 9.92E+17 | IsMasterProtein | A0A8C5F3R5 | Protein phosphatase, Mg2+/Mn2+ dependent, 1Da OS=Gadus morhua OX=8049 GN=PPM1D PE=3 SV=1                         | 6  | 2 | 4 | 2 | 551  | 60.2  | 5.76 | 10.22 | 2 | 1 |
| 1E+18    | IsMasterProtein | A0A8C5FS01 | Protein phosphatase 1 regulatory subunit 29-like OS=Gadus morhua OX=8049 GN=LOC115535811 PE=4 SV=1               | 4  | 2 | 2 | 2 | 968  | 106.6 | 7.88 | 4.72  | 2 | 1 |
| 1.02E+18 | IsMasterProtein | A0A8C5BVB7 | Pentraxin 3, long a OS=Gadus morhua OX=8049 GN=PTX3 PE=4 SV=1                                                    | 6  | 2 | 2 | 2 | 490  | 51.5  | 5.82 | 6     | 2 | 1 |
| 1.02E+18 | IsMasterProtein | A0A8C4ZTJ1 | IQ motif and ubiquitin domain containing OS=Gadus morhua OX=8049 PE=4 SV=1                                       | 7  | 2 | 2 | 2 | 505  | 57.8  | 9.89 | 6.29  | 2 | 1 |
| 1.06E+18 | IsMasterProtein | A0A8C5B035 | Zinc finger and BTB domain containing 18 OS=Gadus morhua OX=8049 GN=zbtb18 PE=4 SV=1                             | 9  | 2 | 2 | 2 | 566  | 61.6  | 7.03 | 5.59  | 2 | 1 |
| 1.09E+18 | IsMasterProtein | A0A8C5CUF7 | Uncharacterized protein OS=Gadus morhua OX=8049 PE=4 SV=1                                                        | 7  | 2 | 2 | 2 | 428  | 45.6  | 5.68 | 5.36  | 2 | 1 |
| 1.11E+18 | IsMasterProtein | A0A8C5BTU2 | NEDD8-activating enzyme E1 catalytic subunit OS=Gadus morhua OX=8049 GN=uba3 PE=3 SV=1                           | 9  | 2 | 2 | 2 | 443  | 49.1  | 5.2  | 4.97  | 2 | 1 |
| 1.16E+18 | IsMasterProtein | A0A8C5FFK9 | Uncharacterized protein OS=Gadus morhua OX=8049 PE=4 SV=1                                                        | 6  | 2 | 2 | 2 | 524  | 56.6  | 6.42 | 4.57  | 2 | 1 |
| 1.17E+18 | IsMasterProtein | A0A8C5FJQ6 | Notch receptor 3 OS=Gadus morhua OX=8049 GN=notch3 PE=3 SV=1                                                     | 3  | 3 | 6 | 2 | 2451 | 264.3 | 5.68 | 13.53 | 3 | 1 |
| 1.22E+18 | IsMasterProtein | A0A8C5F9W0 | Hydroxysteroid dehydrogenase like 1 OS=Gadus morhua OX=8049 GN=hsd11 PE=4 SV=1                                   | 10 | 2 | 2 | 2 | 316  | 34.2  | 7.55 | 6.39  | 2 | 1 |
| 1.22E+18 | IsMasterProtein | A0A8C5A8E0 | DNA polymerase zeta catalytic subunit OS=Gadus morhua OX=8049 GN=REV3L PE=3 SV=1                                 | 1  | 2 | 2 | 2 | 2641 | 290.8 | 7.2  | 4.36  | 2 | 1 |
| 1.28E+18 | IsMasterProtein | A0A8C5AWV8 | Ribosomal RNA adenine dimethylase domain containing 1 OS=Gadus morhua OX=8049 GN=rrnad1 PE=4 SV=1                | 6  | 2 | 2 | 2 | 640  | 71.3  | 8.47 | 4.79  | 2 | 1 |
| 1.28E+18 | IsMasterProtein | A0A8C4YVX6 | Serine racemase OS=Gadus morhua OX=8049 GN=srr PE=4 SV=1                                                         | 14 | 2 | 2 | 2 | 325  | 34.4  | 6.43 | 5.5   | 2 | 1 |
| 1.33E+18 | IsMasterProtein | A0A8C5BWZ5 | Polypeptide N-acetylgalactosaminyltransferase OS=Gadus morhua OX=8049 GN=galnt1 PE=3 SV=1                        | 6  | 2 | 2 | 2 | 504  | 57.9  | 7.61 | 5.52  | 2 | 1 |
| 1.35E+18 | IsMasterProtein | A0A8C5B323 | Patched domain containing 1 OS=Gadus morhua OX=8049 GN=ptchd1 PE=4 SV=1                                          | 5  | 2 | 2 | 2 | 1048 | 114.5 | 8.88 | 5.55  | 2 | 1 |
| 1.37E+18 | IsMasterProtein | A0A8C4ZLT7 | Histone acetyltransferase OS=Gadus morhua OX=8049 GN=CREBBP PE=4 SV=1                                            | 1  | 3 | 3 | 2 | 2365 | 258.1 | 8.73 | 6.34  | 3 | 1 |
| 1.38E+18 | IsMasterProtein | A0A8C4ZCC9 | PDZ domain containing 7 OS=Gadus morhua OX=8049 GN=PDZD7 PE=4 SV=1                                               | 7  | 2 | 2 | 2 | 926  | 99.1  | 9.57 | 6.5   | 2 | 1 |
| 1.42E+18 | IsMasterProtein | A0A8C5AFS3 | G protein-coupled receptor 158a OS=Gadus morhua OX=8049 PE=3 SV=1                                                | 4  | 2 | 2 | 2 | 1222 | 136   | 8.27 | 4.84  | 2 | 1 |
| 1.44E+18 | IsMasterProtein | A0A8C5FAJ1 | Hepatocyte growth factor receptor OS=Gadus morhua OX=8049 PE=4 SV=1                                              | 2  | 2 | 2 | 2 | 1334 | 146.2 | 8.25 | 4.1   | 2 | 1 |
| 1.44E+18 | IsMasterProtein | A0A8C4Z2A3 | Leucine-rich repeat neuronal protein 1-like OS=Gadus morhua OX=8049 GN=LOC115557552 PE=4 SV=1                    | 6  | 2 | 2 | 2 | 726  | 80.6  | 6.57 | 5.36  | 2 | 1 |
| 1.45E+18 | IsMasterProtein | A0A8C4ZJ90 | Acyl-coenzyme A thioesterase 1-like OS=Gadus morhua OX=8049 GN=LOC115557495 PE=3 SV=1                            | 16 | 2 | 2 | 2 | 463  | 51.1  | 7.23 | 6.51  | 2 | 1 |
| 1.5E+18  | IsMasterProtein | A0A8C5A540 | Phosphodiesterase OS=Gadus morhua OX=8049 GN=pde1b PE=3 SV=1                                                     | 5  | 2 | 2 | 2 | 560  | 64.8  | 5.67 | 4.73  | 2 | 1 |
| 1.5E+18  | IsMasterProtein | A0A8C5C5A2 | Ssu-2 homolog, related sequence 1 OS=Gadus morhua OX=8049 GN=ssuh2rs1 PE=4 SV=1                                  | 16 | 2 | 2 | 2 | 362  | 40    | 7.02 | 5.07  | 2 | 1 |
| 1.51E+18 | IsMasterProtein | A0A8C5A0H4 | Heparan-alpha-glucosaminide N-acetyltransferase OS=Gadus morhua OX=8049 GN=hgsnat PE=4 SV=1                      | 6  | 2 | 3 | 2 | 620  | 70.2  | 8.98 | 8.1   | 2 | 1 |
| 1.52E+18 | IsMasterProtein | A0A8C4ZMP7 | Guanine nucleotide binding protein (G protein), alpha 11b (Gq class) OS=Gadus morhua OX=8049 GN=gna11b PE=3 SV=1 | 10 | 2 | 2 | 2 | 374  | 43.7  | 6.07 | 6.58  | 2 | 1 |
| 1.54E+18 | IsMasterProtein | A0A8C5BLQ7 | BCL2-associated athanogene 6 OS=Gadus morhua OX=8049 GN=bag6 PE=4 SV=1                                           | 3  | 2 | 2 | 2 | 1136 | 121   | 5.91 | 4.71  | 2 | 1 |
| 1.54E+18 | IsMasterProtein | A0A8C4ZNV3 | TAR DNA-binding protein 43 OS=Gadus morhua OX=8049 GN=tardbp PE=4 SV=1                                           | 11 | 4 | 4 | 2 | 404  | 43.6  | 6.02 | 9.49  | 4 | 1 |
| 1.55E+18 | IsMasterProtein | A0A8C5BVS8 | ATP-dependent DNA helicase OS=Gadus morhua OX=8049 GN=RECQL PE=3 SV=1                                            | 5  | 2 | 3 | 2 | 848  | 92.9  | 9.1  | 7.14  | 2 | 1 |
| 1.56E+18 | IsMasterProtein | A0A8C5AY23 | Histone acetyltransferase OS=Gadus morhua OX=8049 PE=4 SV=1                                                      | 1  | 3 | 4 | 2 | 2423 | 260.5 | 8.35 | 9.64  | 3 | 1 |
| 1.57E+18 | IsMasterProtein | A0A8C5AUS0 | Mitoguardin 2 OS=Gadus morhua OX=8049 GN=miga2 PE=3 SV=1                                                         | 6  | 2 | 2 | 2 | 584  | 64.9  | 6.2  | 5.41  | 2 | 1 |
| 1.58E+18 | IsMasterProtein | A0A8C5FT60 | Uncharacterized protein OS=Gadus morhua OX=8049 PE=4 SV=1                                                        | 4  | 2 | 2 | 2 | 1384 | 152.2 | 9.39 | 5.63  | 2 | 1 |

|          |                 |            |                                                                                                                    |    |    |    |   |      |       |      |        |    |   |
|----------|-----------------|------------|--------------------------------------------------------------------------------------------------------------------|----|----|----|---|------|-------|------|--------|----|---|
| 1.6E+18  | IsMasterProtein | A0A8C5FJE2 | Epithelial splicing regulatory protein 2 OS=Gadus morhua OX=8049 GN=esrp2 PE=3 SV=1                                | 7  | 3  | 4  | 2 | 698  | 76.6  | 6.9  | 10.26  | 3  | 1 |
| 1.61E+18 | IsMasterProtein | A0A8C5FLJ8 | Ataxin 7-like 2b OS=Gadus morhua OX=8049 GN=atxn7l2b PE=4 SV=1                                                     | 4  | 2  | 2  | 2 | 704  | 76.1  | 9.01 | 5.31   | 2  | 1 |
| 1.63E+18 | IsMasterProtein | A0A8C5FIS1 | DUF4585 domain-containing protein OS=Gadus morhua OX=8049 GN=LOC115540703 PE=4 SV=1                                | 2  | 2  | 2  | 2 | 1456 | 157.8 | 6.57 | 4.93   | 2  | 1 |
| 1.64E+18 | IsMasterProtein | Q92079     | Serotransferrin (Fragment) OS=Gadus morhua OX=8049 GN=tf PE=2 SV=1                                                 | 57 | 37 | 87 | 2 | 642  | 67.9  | 6.52 | 308.06 | 37 | 1 |
| 1.66E+18 | IsMasterProtein | A0A8C5FEM9 | Phosphatidylinositol-3,4-bisphosphate 4-phosphatase OS=Gadus morhua OX=8049 GN=inpp4b PE=3 SV=1                    | 4  | 2  | 3  | 2 | 976  | 108.6 | 6.61 | 8.86   | 2  | 1 |
| 1.67E+18 | IsMasterProtein | A0A8C5FKC3 | Acyl-CoA dehydrogenase short chain OS=Gadus morhua OX=8049 GN=acads PE=3 SV=1                                      | 16 | 2  | 2  | 2 | 401  | 43    | 7.46 | 6.49   | 2  | 1 |
| 1.68E+18 | IsMasterProtein | A0A8C4ZD74 | Activated RNA polymerase II transcriptional coactivator p15 OS=Gadus morhua OX=8049 PE=3 SV=1                      | 15 | 2  | 2  | 2 | 127  | 13.7  | 9.57 | 5.25   | 2  | 1 |
| 1.71E+18 | IsMasterProtein | A0A8C5AB44 | Eukaryotic translation initiation factor 4E nuclear import factor 1 OS=Gadus morhua OX=8049 GN=EIF4ENIF1 PE=4 SV=1 | 9  | 2  | 2  | 2 | 707  | 78.8  | 7.08 | 6.36   | 2  | 1 |
| 1.71E+18 | IsMasterProtein | A0A8C5FI46 | Neuronal cell adhesion molecule-like OS=Gadus morhua OX=8049 GN=NRCAM PE=3 SV=1                                    | 4  | 2  | 2  | 2 | 1248 | 138   | 6.44 | 5.18   | 2  | 1 |
| 1.71E+18 | IsMasterProtein | A0A8C4ZVH7 | F-box and leucine rich repeat protein 14 OS=Gadus morhua OX=8049 GN=fbxl14 PE=4 SV=1                               | 12 | 2  | 2  | 2 | 398  | 43.9  | 8.38 | 4.55   | 2  | 1 |
| 1.72E+18 | IsMasterProtein | A0A8C5A6P3 | Rho/rac guanine nucleotide exchange factor (GEF) 18a OS=Gadus morhua OX=8049 GN=arhgef18a PE=4 SV=1                | 3  | 2  | 2  | 2 | 1029 | 116.4 | 6.64 | 4.95   | 2  | 1 |
| 1.73E+18 | IsMasterProtein | A0A8C5F5H9 | Si:ch73-132f6.5 OS=Gadus morhua OX=8049 PE=4 SV=1                                                                  | 3  | 2  | 2  | 2 | 618  | 66.2  | 7.66 | 4.67   | 2  | 1 |
| 1.75E+18 | IsMasterProtein | A0A8C4ZL79 | Syntaxin 16 OS=Gadus morhua OX=8049 GN=stx16 PE=3 SV=1                                                             | 11 | 2  | 2  | 2 | 302  | 34.9  | 5.76 | 7.64   | 2  | 1 |
| 1.77E+18 | IsMasterProtein | A0A8C5CRL8 | Cathepsin B OS=Gadus morhua OX=8049 GN=ctsba PE=3 SV=1                                                             | 9  | 2  | 2  | 2 | 347  | 38    | 6.73 | 6.05   | 2  | 1 |
| 1.77E+18 | IsMasterProtein | A0A8C5AP46 | Uncharacterized LOC115560927 OS=Gadus morhua OX=8049 GN=LOC115560927 PE=4 SV=1                                     | 13 | 2  | 3  | 2 | 406  | 44    | 7.93 | 8.79   | 2  | 1 |
| 1.78E+18 | IsMasterProtein | A0A8C4ZN45 | CCHC-type zinc finger, nucleic acid binding protein a OS=Gadus morhua OX=8049 PE=4 SV=1                            | 13 | 2  | 2  | 2 | 151  | 16.5  | 7.37 | 4.85   | 2  | 1 |
| 1.79E+18 | IsMasterProtein | A0A8C4Z0S4 | Dymeclin OS=Gadus morhua OX=8049 GN=dym PE=3 SV=1                                                                  | 5  | 2  | 2  | 2 | 614  | 69.7  | 6.25 | 5.1    | 2  | 1 |
| 1.82E+18 | IsMasterProtein | A0A8C4ZCR1 | Synapse defective Rho GTPase homolog 1 OS=Gadus morhua OX=8049 GN=syde1 PE=4 SV=1                                  | 3  | 2  | 3  | 2 | 958  | 103.8 | 8.02 | 7.19   | 2  | 1 |
| 1.83E+18 | IsMasterProtein | A0A8C4ZEW5 | DNA polymerase alpha subunit B OS=Gadus morhua OX=8049 GN=pola2 PE=3 SV=1                                          | 9  | 2  | 2  | 2 | 600  | 66.4  | 5.27 | 6.34   | 2  | 1 |
| 1.84E+18 | IsMasterProtein | A0A8C5CHK7 | Uncharacterized LOC115529475 OS=Gadus morhua OX=8049 GN=LOC115529475 PE=4 SV=1                                     | 14 | 2  | 3  | 2 | 274  | 29.7  | 7.34 | 6.9    | 2  | 1 |
| 1.85E+18 | IsMasterProtein | A0A8C5B5U1 | Leucine zipper, putative tumor suppressor family member 3b OS=Gadus morhua OX=8049 GN=lzts3b PE=4 SV=1             | 3  | 2  | 2  | 2 | 1042 | 117.2 | 6.92 | 4.82   | 2  | 1 |
| 1.87E+18 | IsMasterProtein | A0A8C5ABC3 | Mitochondrial ribosomal protein L12 OS=Gadus morhua OX=8049 GN=mrpl12 PE=3 SV=1                                    | 22 | 2  | 2  | 2 | 173  | 18.8  | 6.57 | 6.06   | 2  | 1 |
| 1.88E+18 | IsMasterProtein | A0A8C4ZA92 | RIB43A domain with coiled-coils 1 OS=Gadus morhua OX=8049 GN=RIBC1 PE=3 SV=1                                       | 9  | 2  | 2  | 2 | 367  | 43.2  | 5.66 | 4.73   | 2  | 1 |
| 1.89E+18 | IsMasterProtein | A0A8C5D3I0 | Methyl-CpG-binding domain protein 5-like OS=Gadus morhua OX=8049 GN=LOC115542220 PE=4 SV=1                         | 4  | 2  | 2  | 2 | 1496 | 156.4 | 9.33 | 5.75   | 2  | 1 |
| 1.9E+18  | IsMasterProtein | A0A8C5AWV5 | Tubulin tyrosine ligase-like family, member 5 OS=Gadus morhua OX=8049 GN=ttl5 PE=4 SV=1                            | 4  | 2  | 2  | 2 | 875  | 97.1  | 8.48 | 5.21   | 2  | 1 |
| 1.9E+18  | IsMasterProtein | A0A8C4YT70 | Myosin, light chain 1, alkali; skeletal, fast OS=Gadus morhua OX=8049 GN=myl1 PE=4 SV=1                            | 13 | 2  | 2  | 2 | 194  | 21.2  | 4.83 | 5.82   | 2  | 1 |
| 1.92E+18 | IsMasterProtein | A0A8C5F3S6 | Coatomer subunit beta OS=Gadus morhua OX=8049 PE=4 SV=1                                                            | 2  | 2  | 3  | 2 | 955  | 107.1 | 6    | 7.25   | 2  | 1 |
| 1.98E+18 | IsMasterProtein | A0A8C4Z4I9 | Regulation of nuclear pre-mRNA domain containing 2b OS=Gadus morhua OX=8049 GN=rprd2b PE=4 SV=1                    | 2  | 2  | 2  | 2 | 1241 | 132.8 | 9.5  | 4.78   | 2  | 1 |
| 2.02E+18 | IsMasterProtein | A0A8C5B120 | Galectin OS=Gadus morhua OX=8049 GN=LOC115545324 PE=4 SV=1                                                         | 20 | 2  | 2  | 2 | 163  | 18.5  | 6.95 | 4.95   | 2  | 1 |
| 2.02E+18 | IsMasterProtein | A0A8C5CH26 | Signal induced proliferation associated 1 like 2 OS=Gadus morhua OX=8049 GN=SIPAIL2 PE=4 SV=1                      | 4  | 2  | 2  | 2 | 1559 | 172.4 | 6.83 | 5.94   | 2  | 1 |
| 2.03E+18 | IsMasterProtein | A0A8C5FR40 | Telomere length regulation protein TEL2 homolog OS=Gadus morhua OX=8049 GN=telo2 PE=3 SV=1                         | 5  | 2  | 3  | 2 | 859  | 95.4  | 5.52 | 7.52   | 2  | 1 |
| 2.05E+18 | IsMasterProtein | A0A8C5BKN5 | CCHC-type domain-containing protein OS=Gadus morhua OX=8049 PE=4 SV=1                                              | 11 | 2  | 2  | 2 | 561  | 64.9  | 8.88 | 6.54   | 2  | 1 |

|          |                 |            |                                                                                                       |    |    |    |   |      |       |       |       |    |   |
|----------|-----------------|------------|-------------------------------------------------------------------------------------------------------|----|----|----|---|------|-------|-------|-------|----|---|
| 2.05E+18 | IsMasterProtein | A0A8C5FU79 | BAF chromatin remodeling complex subunit BCL11A a OS=Gadus morhua OX=8049 GN=bc111aa PE=4 SV=1        | 4  | 2  | 2  | 2 | 1030 | 111.2 | 7.34  | 5.22  | 2  | 1 |
| 2.06E+18 | IsMasterProtein | A0A8C4Z3Z0 | LSM14A mRNA processing body assembly factor a OS=Gadus morhua OX=8049 GN=lsm14aa PE=3 SV=1            | 7  | 2  | 2  | 2 | 485  | 52    | 9.64  | 5.37  | 2  | 1 |
| 2.07E+18 | IsMasterProtein | A0A8C5FCP7 | Uncharacterized protein OS=Gadus morhua OX=8049 PE=4 SV=1                                             | 2  | 2  | 2  | 2 | 816  | 89    | 5.92  | 4.72  | 2  | 1 |
| 2.12E+18 | IsMasterProtein | A0A8C5AY61 | Uncharacterized protein OS=Gadus morhua OX=8049 PE=4 SV=1                                             | 5  | 2  | 2  | 2 | 1039 | 113.4 | 4.87  | 5.44  | 2  | 1 |
| 2.15E+18 | IsMasterProtein | A0A8C5F7Q1 | Uncharacterized protein OS=Gadus morhua OX=8049 PE=4 SV=1                                             | 18 | 2  | 2  | 2 | 154  | 17    | 8.12  | 5.3   | 2  | 1 |
| 2.18E+18 | IsMasterProtein | A0A8C5CAC9 | Sodium/hydrogen exchanger OS=Gadus morhua OX=8049 PE=3 SV=1                                           | 6  | 2  | 2  | 2 | 658  | 72.7  | 6.74  | 5.45  | 2  | 1 |
| 2.19E+18 | IsMasterProtein | A0A8C5C6D3 | Carboxypeptidase Z OS=Gadus morhua OX=8049 PE=3 SV=1                                                  | 5  | 2  | 2  | 2 | 612  | 68.6  | 7.46  | 4.79  | 2  | 1 |
| 2.2E+18  | IsMasterProtein | A0A8C4YUA9 | Family with sequence similarity 102 member Aa OS=Gadus morhua OX=8049 GN=fam102aa PE=3 SV=1           | 12 | 2  | 2  | 2 | 370  | 40.2  | 8.56  | 5.69  | 2  | 1 |
| 2.22E+18 | IsMasterProtein | A0A8C5D2V8 | Nuclear prelamin A recognition factor-like OS=Gadus morhua OX=8049 GN=narfl PE=3 SV=1                 | 7  | 2  | 2  | 2 | 424  | 47.3  | 7.11  | 4.61  | 2  | 1 |
| 2.22E+18 | IsMasterProtein | A0A8C5A632 | BRICHOS domain containing 5 OS=Gadus morhua OX=8049 GN=bricd5 PE=4 SV=1                               | 18 | 2  | 3  | 2 | 233  | 25.7  | 5.71  | 12.37 | 2  | 1 |
| 2.23E+18 | IsMasterProtein | A0A8C5CYE4 | Uncharacterized protein OS=Gadus morhua OX=8049 PE=4 SV=1                                             | 20 | 2  | 2  | 2 | 272  | 29.7  | 8.69  | 5.49  | 2  | 1 |
| 2.24E+18 | IsMasterProtein | A0A8C5AMQ8 | Patched 1 OS=Gadus morhua OX=8049 GN=ptch1 PE=3 SV=1                                                  | 3  | 2  | 2  | 2 | 1297 | 144.8 | 8.02  | 5.25  | 2  | 1 |
| 2.25E+18 | IsMasterProtein | A0A8C5F803 | Uncharacterized protein OS=Gadus morhua OX=8049 PE=3 SV=1                                             | 1  | 2  | 2  | 2 | 2940 | 320   | 8.32  | 4.71  | 2  | 1 |
| 2.31E+18 | IsMasterProtein | A0A8C5BDH3 | Protein farnesyltransferase subunit beta OS=Gadus morhua OX=8049 GN=fnfb PE=3 SV=1                    | 7  | 2  | 3  | 2 | 427  | 47.9  | 7.47  | 7.11  | 2  | 1 |
| 2.31E+18 | IsMasterProtein | A0A8C5FUM3 | Caveolae associated protein 1a OS=Gadus morhua OX=8049 GN=cavin1a PE=3 SV=1                           | 7  | 2  | 2  | 2 | 430  | 48.1  | 5.34  | 4.26  | 2  | 1 |
| 2.32E+18 | IsMasterProtein | A0A8C5CNW4 | Zinc finger protein 516-like OS=Gadus morhua OX=8049 GN=LOC115536299 PE=4 SV=1                        | 4  | 2  | 2  | 2 | 1056 | 111   | 8.81  | 5.08  | 2  | 1 |
| 2.33E+18 | IsMasterProtein | A0A8C4ZPP5 | Uncharacterized protein OS=Gadus morhua OX=8049 PE=3 SV=1                                             | 16 | 15 | 22 | 2 | 1388 | 152.7 | 6.23  | 73.69 | 15 | 1 |
| 2.35E+18 | IsMasterProtein | A0A8C5CPP1 | Actin binding Rho activating protein a OS=Gadus morhua OX=8049 GN=abraa PE=4 SV=1                     | 10 | 2  | 2  | 2 | 359  | 39.5  | 9.13  | 4.83  | 2  | 1 |
| 2.35E+18 | IsMasterProtein | A0A8C5FGA8 | Guanylate cyclase OS=Gadus morhua OX=8049 GN=LOC115529988 PE=3 SV=1                                   | 4  | 2  | 2  | 2 | 983  | 109.6 | 7.34  | 5.61  | 2  | 1 |
| 2.35E+18 | IsMasterProtein | A0A8C4Z1D1 | 60S ribosomal protein L31 OS=Gadus morhua OX=8049 GN=LOC115541599 PE=3 SV=1                           | 16 | 2  | 2  | 2 | 124  | 14.3  | 10.43 | 4.69  | 2  | 1 |
| 2.36E+18 | IsMasterProtein | A0A8C5BCL9 | Kinesin-like protein OS=Gadus morhua OX=8049 GN=kifc3 PE=3 SV=1                                       | 5  | 2  | 2  | 2 | 748  | 83.5  | 6.24  | 5.61  | 2  | 1 |
| 2.37E+18 | IsMasterProtein | A0A8C5FH27 | Parvalbumin OS=Gadus morhua OX=8049 GN=LOC115537726 PE=3 SV=1                                         | 19 | 2  | 2  | 2 | 114  | 12.4  | 5.06  | 4.75  | 2  | 1 |
| 2.39E+18 | IsMasterProtein | A0A8C4ZG64 | Betaine--homocysteine S-methyltransferase 1-like OS=Gadus morhua OX=8049 GN=LOC115546034 PE=4 SV=1    | 6  | 2  | 2  | 2 | 363  | 40    | 6.84  | 6.53  | 2  | 1 |
| 2.39E+18 | IsMasterProtein | A0A8C5BW98 | Uncharacterized protein OS=Gadus morhua OX=8049 PE=3 SV=1                                             | 4  | 2  | 2  | 2 | 722  | 82.6  | 9.13  | 4.37  | 2  | 1 |
| 2.39E+18 | IsMasterProtein | A0A8C5C1L0 | Zinc finger protein 271-like OS=Gadus morhua OX=8049 GN=LOC115547371 PE=4 SV=1                        | 7  | 2  | 3  | 2 | 512  | 57.3  | 8.07  | 4.84  | 2  | 1 |
| 2.43E+18 | IsMasterProtein | A0A8C5ADK7 | Leucine rich pentatricopeptide repeat containing OS=Gadus morhua OX=8049 GN=LRPPRC PE=4 SV=1          | 7  | 3  | 5  | 2 | 1235 | 137.9 | 6.19  | 13    | 3  | 1 |
| 2.43E+18 | IsMasterProtein | A0A8C4ZBY9 | RAB1A, member RAS oncogene family OS=Gadus morhua OX=8049 GN=RAB1A PE=4 SV=1                          | 33 | 5  | 9  | 2 | 201  | 22.3  | 7.05  | 22.67 | 5  | 1 |
| 2.45E+18 | IsMasterProtein | A0A8C5CT62 | [histone H4]-N-methyl-L-lysine20 N-methyltransferase KMT5B OS=Gadus morhua OX=8049 GN=kmt5c PE=4 SV=1 | 1  | 2  | 2  | 2 | 2162 | 236.9 | 8.62  | 5.28  | 2  | 1 |
| 2.45E+18 | IsMasterProtein | A0A8C4Z872 | INO80 complex subunit D OS=Gadus morhua OX=8049 GN=ino80d PE=4 SV=1                                   | 4  | 2  | 3  | 2 | 1045 | 112.2 | 8.22  | 7.89  | 2  | 1 |
| 2.5E+18  | IsMasterProtein | A0A8C5CUI2 | Family with sequence similarity 172 member A OS=Gadus morhua OX=8049 PE=3 SV=1                        | 7  | 2  | 2  | 2 | 391  | 44.8  | 5.3   | 4.7   | 2  | 1 |
| 2.55E+18 | IsMasterProtein | A0A8C5BST9 | Branched-chain-amino-acid aminotransferase OS=Gadus morhua OX=8049 PE=3 SV=1                          | 5  | 2  | 2  | 2 | 386  | 42.7  | 5.9   | 5.32  | 2  | 1 |
| 2.6E+18  | IsMasterProtein | A0A8C5B2Y2 | Glycerophosphodiester phosphodiesterase domain containing 3a OS=Gadus morhua OX=8049 PE=3 SV=1        | 15 | 2  | 2  | 2 | 306  | 35.1  | 9.48  | 4.74  | 2  | 1 |
| 2.63E+18 | IsMasterProtein | A0A8C5B4G3 | Uncharacterized protein OS=Gadus morhua OX=8049 PE=3 SV=1                                             | 3  | 2  | 2  | 2 | 1404 | 155.7 | 8.05  | 5.39  | 2  | 1 |
| 2.66E+18 | IsMasterProtein | A0A8C4ZUH5 | RAB11 family interacting protein 4 (class II) b OS=Gadus morhua OX=8049 PE=4 SV=1                     | 5  | 2  | 2  | 2 | 594  | 67.9  | 5.03  | 5.23  | 2  | 1 |



|          |                 |            |                                                                                                                       |    |    |    |   |      |       |      |       |    |   |
|----------|-----------------|------------|-----------------------------------------------------------------------------------------------------------------------|----|----|----|---|------|-------|------|-------|----|---|
| 2.66E+18 | IsMasterProtein | A0A8C5AKU7 | Tyrosine-protein phosphatase non-receptor type OS=Gadus morhua OX=8049 PE=3 SV=1                                      | 6  | 2  | 4  | 2 | 1121 | 126.9 | 7.77 | 9.89  | 2  | 1 |
| 2.66E+18 | IsMasterProtein | A0A8C4ZSQ4 | PiggyBac transposable element derived 5 OS=Gadus morhua OX=8049 PE=4 SV=1                                             | 4  | 2  | 2  | 2 | 516  | 57.9  | 8.27 | 4.25  | 2  | 1 |
| 2.67E+18 | IsMasterProtein | A0A8C5BXX3 | PH domain leucine-rich repeat-containing protein phosphatase 1-like OS=Gadus morhua OX=8049 GN=LOC115556351 PE=4 SV=1 | 2  | 2  | 2  | 2 | 1851 | 198.3 | 6.28 | 6.41  | 2  | 1 |
| 2.67E+18 | IsMasterProtein | A0A8C5ATU6 | Tubulin beta chain OS=Gadus morhua OX=8049 PE=3 SV=1                                                                  | 47 | 10 | 19 | 2 | 251  | 27.6  | 5.14 | 71.16 | 10 | 1 |
| 2.67E+18 | IsMasterProtein | A0A8C5BXQ8 | SET binding factor 1 OS=Gadus morhua OX=8049 GN=sbf1 PE=3 SV=1                                                        | 6  | 5  | 5  | 2 | 1868 | 210.1 | 6.99 | 14.35 | 5  | 1 |
| 2.67E+18 | IsMasterProtein | A0A8C4Z7Y8 | Serine and arginine rich splicing factor 9 OS=Gadus morhua OX=8049 GN=srsf9 PE=4 SV=1                                 | 11 | 3  | 3  | 2 | 277  | 30.8  | 9.8  | 7.62  | 3  | 1 |
| 2.68E+18 | IsMasterProtein | A0A8C5CU13 | Retinoblastoma binding protein 4 OS=Gadus morhua OX=8049 GN=rbbp4 PE=4 SV=1                                           | 6  | 2  | 2  | 2 | 431  | 48.3  | 4.87 | 4.89  | 2  | 1 |
| 2.68E+18 | IsMasterProtein | A0A8C5A6F2 | Uncharacterized protein OS=Gadus morhua OX=8049 PE=4 SV=1                                                             | 7  | 2  | 2  | 2 | 460  | 51.1  | 9.67 | 4.69  | 2  | 1 |
| 2.68E+18 | IsMasterProtein | A0A8C4ZK14 | Chromatin assembly factor 1, subunit A (p150) OS=Gadus morhua OX=8049 GN=chaf1a PE=4 SV=1                             | 8  | 3  | 4  | 2 | 906  | 100.8 | 5.38 | 9.73  | 3  | 1 |
| 2.71E+18 | IsMasterProtein | A0A8C4ZED7 | DOP1 leucine zipper like protein B OS=Gadus morhua OX=8049 PE=3 SV=1                                                  | 2  | 2  | 2  | 2 | 2170 | 240   | 6.51 | 5.29  | 2  | 1 |
| 2.71E+18 | IsMasterProtein | A0A8C5CCQ0 | ATP-dependent RNA helicase DHX29 OS=Gadus morhua OX=8049 GN=dhx29 PE=3 SV=1                                           | 2  | 2  | 2  | 2 | 1507 | 169   | 8.35 | 5.03  | 2  | 1 |
| 2.74E+18 | IsMasterProtein | A0A8C5B883 | Ddb1 and cul4 associated factor 5 OS=Gadus morhua OX=8049 GN=dcaf5 PE=4 SV=1                                          | 6  | 2  | 2  | 2 | 909  | 97.4  | 8.97 | 5.39  | 2  | 1 |
| 2.76E+18 | IsMasterProtein | A0A8C5F8B9 | Small G protein signaling modulator 1-like OS=Gadus morhua OX=8049 GN=LOC115541359 PE=4 SV=1                          | 5  | 2  | 2  | 2 | 933  | 106   | 6.44 | 6.24  | 2  | 1 |
| 2.78E+18 | IsMasterProtein | A0A8C5CWI2 | Zinc finger protein, FOG family member 1 OS=Gadus morhua OX=8049 PE=4 SV=1                                            | 5  | 2  | 2  | 2 | 1160 | 120.5 | 8.07 | 5.41  | 2  | 1 |
| 2.82E+18 | IsMasterProtein | A0A8C5AYE4 | Ectopic P-granules autophagy protein 5 homolog (C. elegans) OS=Gadus morhua OX=8049 PE=3 SV=1                         | 2  | 2  | 2  | 2 | 2290 | 253   | 7.36 | 5.55  | 2  | 1 |
| 2.82E+18 | IsMasterProtein | A0A8C4Z619 | Furry homolog, like OS=Gadus morhua OX=8049 PE=4 SV=1                                                                 | 3  | 4  | 4  | 2 | 2861 | 321.6 | 6.67 | 11.07 | 4  | 1 |
| 2.83E+18 | IsMasterProtein | A0A8C5BU08 | Caveolae associated protein 1b OS=Gadus morhua OX=8049 GN=CAVIN1 PE=3 SV=1                                            | 6  | 2  | 2  | 2 | 463  | 51.6  | 4.98 | 4.2   | 2  | 1 |
| 2.86E+18 | IsMasterProtein | A0A8C5A750 | Uncharacterized protein OS=Gadus morhua OX=8049 PE=4 SV=1                                                             | 3  | 2  | 2  | 2 | 1646 | 180.9 | 4.88 | 6.17  | 2  | 1 |
| 2.88E+18 | IsMasterProtein | A0A8C5C9U3 | Death inducer-obliator 1 OS=Gadus morhua OX=8049 PE=4 SV=1                                                            | 2  | 2  | 2  | 2 | 1754 | 198.6 | 6.52 | 4.71  | 2  | 1 |
| 2.9E+18  | IsMasterProtein | A0A8C4Z4T9 | 60S ribosomal protein L12 OS=Gadus morhua OX=8049 PE=3 SV=1                                                           | 21 | 2  | 2  | 2 | 168  | 18    | 9.39 | 6.67  | 2  | 1 |
| 2.95E+18 | IsMasterProtein | A0A8C5BNA3 | Serine/threonine-protein phosphatase OS=Gadus morhua OX=8049 PE=3 SV=1                                                | 22 | 6  | 7  | 2 | 503  | 57.1  | 6.48 | 17.93 | 6  | 1 |
| 2.96E+18 | IsMasterProtein | A0A8C5ANH2 | Protein Wiz-like OS=Gadus morhua OX=8049 GN=si:dkey-217d24.6 PE=4 SV=1                                                | 7  | 2  | 2  | 2 | 723  | 76.8  | 9.5  | 5.52  | 2  | 1 |
| 2.97E+18 | IsMasterProtein | A0A8C4ZF29 | Collagen, type X, alpha 1a OS=Gadus morhua OX=8049 GN=col10a1a PE=4 SV=1                                              | 8  | 2  | 2  | 2 | 661  | 62.6  | 7.01 | 4.61  | 2  | 1 |
| 2.98E+18 | IsMasterProtein | A0A8C5FB75 | Ribonuclease H OS=Gadus morhua OX=8049 PE=3 SV=1                                                                      | 4  | 2  | 2  | 2 | 1356 | 154   | 8.27 | 6.26  | 2  | 1 |
| 2.98E+18 | IsMasterProtein | A0A8C5F3N4 | RecQ helicase-like 4 OS=Gadus morhua OX=8049 GN=recq14 PE=4 SV=1                                                      | 3  | 2  | 2  | 2 | 1670 | 183.4 | 7.08 | 5.27  | 2  | 1 |
| 2.99E+18 | IsMasterProtein | A0A8C5AQ74 | Copine VII OS=Gadus morhua OX=8049 PE=3 SV=1                                                                          | 6  | 3  | 4  | 2 | 533  | 59.6  | 6.35 | 8.72  | 3  | 1 |
| 3.01E+18 | IsMasterProtein | A0A8C5CD63 | Protein SOGA3-like OS=Gadus morhua OX=8049 GN=LOC115553619 PE=4 SV=1                                                  | 5  | 2  | 2  | 2 | 1188 | 126   | 9.57 | 7.54  | 2  | 1 |
| 3.02E+18 | IsMasterProtein | A0A8C5FXG3 | Actin related protein 1, contractin OS=Gadus morhua OX=8049 GN=actr1 PE=3 SV=1                                        | 11 | 2  | 2  | 2 | 379  | 42    | 6.93 | 6.29  | 2  | 1 |
| 3.03E+18 | IsMasterProtein | A0A8C5C072 | Uncharacterized protein OS=Gadus morhua OX=8049 PE=4 SV=1                                                             | 6  | 2  | 2  | 2 | 551  | 62.3  | 7.39 | 4.57  | 2  | 1 |
| 3.04E+18 | IsMasterProtein | A0A8C5CCZ1 | Uncharacterized protein OS=Gadus morhua OX=8049 PE=4 SV=1                                                             | 4  | 2  | 2  | 2 | 864  | 98.9  | 9.5  | 5.31  | 2  | 1 |
| 3.04E+18 | IsMasterProtein | A0A8C5B1E0 | Transient receptor potential cation channel, subfamily V, member 1 OS=Gadus morhua OX=8049 GN=trpv1 PE=4 SV=1         | 4  | 2  | 2  | 2 | 777  | 89    | 7.78 | 4.12  | 2  | 1 |
| 3.06E+18 | IsMasterProtein | A0A8C5AX22 | LIM and calponin homology domains-containing protein 1-like OS=Gadus morhua OX=8049 GN=LOC115540066 PE=4 SV=1         | 1  | 2  | 2  | 2 | 2051 | 225.5 | 5.54 | 4.23  | 2  | 1 |
| 3.09E+18 | IsMasterProtein | A0A8C5ATP4 | Mex-3 RNA binding family member A OS=Gadus morhua OX=8049 GN=mex3a PE=4 SV=1                                          | 13 | 2  | 2  | 2 | 475  | 49.9  | 7.42 | 5.74  | 2  | 1 |
| 3.14E+18 | IsMasterProtein | A0A8C5F5B6 | Myosin, light chain 12, genome duplicate 1 OS=Gadus morhua OX=8049 GN=myl12.1 PE=4 SV=1                               | 17 | 2  | 2  | 2 | 172  | 19.8  | 4.81 | 6.34  | 2  | 1 |

|          |                 |             |                                                                                                        |    |   |   |   |      |       |       |       |   |   |
|----------|-----------------|-------------|--------------------------------------------------------------------------------------------------------|----|---|---|---|------|-------|-------|-------|---|---|
| 3.16E+18 | IsMasterProtein | A0A8C5A9D4  | Si:rp71-1g18.13 OS=Gadus morhua OX=8049 PE=3 SV=1                                                      | 3  | 2 | 2 | 2 | 892  | 96.6  | 5.49  | 4.49  | 2 | 1 |
| 3.19E+18 | IsMasterProtein | A0A8C5FDN4  | Uncharacterized protein OS=Gadus morhua OX=8049 PE=3 SV=1                                              | 5  | 2 | 2 | 2 | 849  | 94.7  | 10.01 | 5.37  | 2 | 1 |
| 3.19E+18 | IsMasterProtein | A0A8C4ZYF2  | E3 ubiquitin-protein ligase Topors-like OS=Gadus morhua OX=8049 GN=LOC115529975 PE=4 SV=1              | 3  | 2 | 2 | 2 | 1181 | 126.6 | 8.44  | 4.69  | 2 | 1 |
| 3.2E+18  | IsMasterProtein | A0A8C5FX86  | Mitogen-activated protein kinase kinase kinase 7 OS=Gadus morhua OX=8049 GN=map3k7 PE=3 SV=1           | 8  | 2 | 3 | 2 | 644  | 71.6  | 8.06  | 7.89  | 2 | 1 |
| 3.21E+18 | IsMasterProtein | A0A8C5FV06  | E3 ubiquitin-protein ligase OS=Gadus morhua OX=8049 GN=ubr3 PE=3 SV=1                                  | 3  | 2 | 2 | 2 | 1865 | 209.9 | 6.52  | 6.06  | 2 | 1 |
| 3.22E+18 | IsMasterProtein | A0A8C4ZFN0  | Leucine rich repeat containing 14B OS=Gadus morhua OX=8049 PE=4 SV=1                                   | 9  | 2 | 2 | 2 | 515  | 57.1  | 5.07  | 5.88  | 2 | 1 |
| 3.27E+18 | IsMasterProtein | A0A8C4ZUL2  | Microtubule-associated protein RP/EB family member 1 OS=Gadus morhua OX=8049 GN=LOC115550022 PE=3 SV=1 | 11 | 2 | 2 | 2 | 254  | 28.3  | 6.15  | 4.83  | 2 | 1 |
| 3.27E+18 | IsMasterProtein | A0A8C5B671  | Protein-tyrosine-phosphatase OS=Gadus morhua OX=8049 PE=3 SV=1                                         | 3  | 2 | 2 | 2 | 1459 | 162.2 | 7.03  | 5.55  | 2 | 1 |
| 3.28E+18 | IsMasterProtein | A0A8C4Z6R2  | THADA armadillo repeat containing OS=Gadus morhua OX=8049 GN=THADA PE=3 SV=1                           | 2  | 2 | 2 | 2 | 1793 | 196.1 | 6.49  | 5.54  | 2 | 1 |
| 3.3E+18  | IsMasterProtein | A0A8C4Z5T8  | Transmembrane channel-like protein OS=Gadus morhua OX=8049 PE=3 SV=1                                   | 9  | 2 | 2 | 2 | 698  | 78.5  | 8.56  | 6.33  | 2 | 1 |
| 3.3E+18  | IsMasterProtein | A0A8C5C908  | Uncharacterized protein OS=Gadus morhua OX=8049 PE=4 SV=1                                              | 8  | 2 | 2 | 2 | 200  | 22.2  | 5.08  | 4.27  | 2 | 1 |
| 3.33E+18 | IsMasterProtein | A0A8C5CGL4  | Dedicator of cytokinesis protein 7-like OS=Gadus morhua OX=8049 GN=LOC115560753 PE=3 SV=1              | 3  | 2 | 2 | 2 | 2102 | 237.9 | 6.89  | 6.13  | 2 | 1 |
| 3.34E+18 | IsMasterProtein | A0A8C5CE24  | Bromodomain and WD repeat domain containing 1 OS=Gadus morhua OX=8049 GN=brwd1 PE=4 SV=1               | 2  | 2 | 3 | 2 | 1422 | 162.6 | 7.8   | 7.53  | 2 | 1 |
| 3.34E+18 | IsMasterProtein | A0A8C5CJ05  | Zinc finger protein RFP-like OS=Gadus morhua OX=8049 GN=LOC115541740 PE=4 SV=1                         | 6  | 2 | 2 | 2 | 543  | 62    | 7.87  | 5.26  | 2 | 1 |
| 3.36E+18 | IsMasterProtein | A0A8C5CDN7  | Uncharacterized LOC115553921 OS=Gadus morhua OX=8049 GN=si:dkeyp-69b9.6 PE=4 SV=1                      | 3  | 2 | 2 | 2 | 1629 | 173.1 | 9.28  | 4.84  | 2 | 1 |
| 3.37E+18 | IsMasterProtein | A0A8C5B507  | Ataxin 1 OS=Gadus morhua OX=8049 PE=3 SV=1                                                             | 6  | 2 | 2 | 2 | 700  | 70.5  | 9.58  | 5.27  | 2 | 1 |
| 3.37E+18 | IsMasterProtein | A0A8C4ZTQ4  | GDT1 family protein OS=Gadus morhua OX=8049 GN=tmem165 PE=3 SV=1                                       | 8  | 2 | 2 | 2 | 360  | 40.5  | 9.74  | 4.39  | 2 | 1 |
| 3.42E+18 | IsMasterProtein | A0A8C5C3G4  | Forkhead box protein P2-like OS=Gadus morhua OX=8049 GN=FOXP2 PE=4 SV=1                                | 5  | 2 | 2 | 2 | 484  | 53.8  | 8.51  | 4.94  | 2 | 1 |
| 3.44E+18 | IsMasterProtein | A0A8C4ZAB3  | Myosin heavy chain, fast skeletal muscle-like OS=Gadus morhua OX=8049 GN=LOC115542533 PE=3 SV=1        | 5  | 8 | 8 | 2 | 1939 | 221.3 | 5.73  | 20.12 | 8 | 1 |
| 3.46E+18 | IsMasterProtein | A0A8C5FHM7  | Testis associated actin remodelling kinase 1 OS=Gadus morhua OX=8049 GN=tesk1 PE=4 SV=1                | 6  | 2 | 2 | 2 | 678  | 72.1  | 5.72  | 4.95  | 2 | 1 |
| 3.48E+18 | IsMasterProtein | A0A8C5AW05  | Inactive dipeptidyl peptidase 10-like OS=Gadus morhua OX=8049 GN=LOC115549815 PE=4 SV=1                | 7  | 2 | 2 | 2 | 759  | 84    | 6.3   | 4.57  | 2 | 1 |
| 3.5E+18  | IsMasterProtein | K4FZF0      | Toll-like receptor 22b OS=Gadus morhua OX=8049 GN=tlr22b PE=2 SV=1                                     | 7  | 3 | 4 | 2 | 942  | 108.3 | 8.6   | 11.99 | 3 | 1 |
| 3.56E+18 | IsMasterProtein | A0A8C5CSK8  | Protein-tyrosine-phosphatase OS=Gadus morhua OX=8049 PE=3 SV=1                                         | 3  | 2 | 2 | 2 | 1361 | 152.1 | 6.64  | 5.56  | 2 | 1 |
| 3.56E+18 | IsMasterProtein | A0A8C4ZSE0  | D4, zinc and double PHD fingers family 2 OS=Gadus morhua OX=8049 GN=dpf2 PE=4 SV=1                     | 11 | 2 | 2 | 2 | 417  | 46.5  | 6.9   | 5.83  | 2 | 1 |
| 3.6E+18  | IsMasterProtein | A0A8C5AL64  | TBC1 (tre-2/USP6, BUB2, cdc16) domain family, member 1 OS=Gadus morhua OX=8049 PE=4 SV=1               | 6  | 2 | 2 | 2 | 1088 | 121.4 | 6.95  | 6.01  | 2 | 1 |
| 3.63E+18 | IsMasterProtein | A0A8C4ZAZ5  | Uncharacterized protein OS=Gadus morhua OX=8049 PE=4 SV=1                                              | 3  | 2 | 2 | 2 | 1132 | 121.7 | 9.6   | 5.08  | 2 | 1 |
| 3.65E+18 | IsMasterProtein | A0A8C4Z9H9  | Kelch repeat and BTB (POZ) domain containing 12 OS=Gadus morhua OX=8049 GN=kbtbd12 PE=4 SV=1           | 8  | 2 | 2 | 2 | 619  | 69.7  | 5.78  | 5.03  | 2 | 1 |
| 3.65E+18 | IsMasterProtein | cRAP_P02534 | Keratin, type I microfibillar 48 kDa, component 8C-1 OS=Ovis aries PE=1 SV=2                           | 19 | 6 | 6 | 2 | 412  | 46.6  | 4.81  | 16.21 | 6 | 1 |
| 3.68E+18 | IsMasterProtein | A0A8C5BUB3  | Splicing factor U2AF 35 kDa subunit-like OS=Gadus morhua OX=8049 GN=LOC115542997 PE=4 SV=1             | 15 | 2 | 2 | 2 | 285  | 31.9  | 9.06  | 5.37  | 2 | 1 |
| 3.69E+18 | IsMasterProtein | A0A8C5CDN1  | Homeobox A3a OS=Gadus morhua OX=8049 GN=hoxa3a PE=3 SV=1                                               | 7  | 2 | 2 | 2 | 422  | 45.4  | 8.7   | 4.38  | 2 | 1 |
| 3.74E+18 | IsMasterProtein | A0A8C5ADP7  | Claspin OS=Gadus morhua OX=8049 GN=CLSPN PE=4 SV=1                                                     | 3  | 2 | 2 | 2 | 1361 | 148.6 | 4.73  | 4.86  | 2 | 1 |
| 3.74E+18 | IsMasterProtein | A0A8C4ZIA3  | F-actin-capping protein subunit alpha OS=Gadus morhua OX=8049 GN=CAPZA2 PE=3 SV=1                      | 18 | 3 | 3 | 2 | 280  | 32.1  | 6.76  | 7.62  | 3 | 1 |
| 3.79E+18 | IsMasterProtein | A0A8C5FUE3  | Protein-tyrosine-phosphatase OS=Gadus morhua OX=8049 GN=ptpn6 PE=3 SV=1                                | 5  | 2 | 3 | 2 | 564  | 64.5  | 6.89  | 6.99  | 2 | 1 |
| 3.8E+18  | IsMasterProtein | A0A8C5FH78  | Uncharacterized protein OS=Gadus morhua OX=8049 PE=4 SV=1                                              | 3  | 2 | 2 | 2 | 1093 | 117.7 | 7.02  | 4.79  | 2 | 1 |

|          |                 |            |                                                                                                                                                  |    |   |   |   |      |       |       |       |   |   |
|----------|-----------------|------------|--------------------------------------------------------------------------------------------------------------------------------------------------|----|---|---|---|------|-------|-------|-------|---|---|
| 3.8E+18  | IsMasterProtein | A0A8C5A237 | ER membrane protein complex subunit 8 OS=Gadus morhua OX=8049 GN=emc8 PE=3 SV=1                                                                  | 18 | 2 | 2 | 2 | 203  | 23.2  | 5.43  | 5.29  | 2 | 1 |
| 3.82E+18 | IsMasterProtein | A0A8C5B7B7 | Nephronophthisis 3 OS=Gadus morhua OX=8049 GN=NPHP3 PE=4 SV=1                                                                                    | 2  | 2 | 2 | 2 | 1254 | 141.3 | 6.38  | 4.59  | 2 | 1 |
| 3.84E+18 | IsMasterProtein | A0A8C5BQF0 | General transcription factor IIIC, polypeptide 4 OS=Gadus morhua OX=8049 GN=gtf3c4 PE=4 SV=1                                                     | 4  | 2 | 2 | 2 | 807  | 89.5  | 6.01  | 4.81  | 2 | 1 |
| 3.85E+18 | IsMasterProtein | A0A8C5FGW6 | Uncharacterized LOC115542966 OS=Gadus morhua OX=8049 GN=LOC115542966 PE=4 SV=1                                                                   | 1  | 2 | 2 | 2 | 2341 | 253.8 | 7.03  | 5.74  | 2 | 1 |
| 3.87E+18 | IsMasterProtein | A0A8C5AE41 | Galectin OS=Gadus morhua OX=8049 PE=4 SV=1                                                                                                       | 10 | 2 | 2 | 2 | 241  | 25.2  | 9.45  | 4.88  | 2 | 1 |
| 3.87E+18 | IsMasterProtein | A0A8C5F596 | Proteasome subunit beta OS=Gadus morhua OX=8049 GN=psmb9a PE=3 SV=1                                                                              | 10 | 2 | 2 | 2 | 216  | 23    | 4.61  | 5.47  | 2 | 1 |
| 3.89E+18 | IsMasterProtein | A0A8C5A714 | Serine/threonine-protein kinase NIM1-like OS=Gadus morhua OX=8049 GN=LOC115555088 PE=3 SV=1                                                      | 13 | 2 | 2 | 2 | 410  | 45.6  | 8.51  | 7.14  | 2 | 1 |
| 3.89E+18 | IsMasterProtein | A0A8C4Z2M1 | Low-density lipoprotein receptor-related protein 1-like OS=Gadus morhua OX=8049 GN=LOC115543056 PE=3 SV=1                                        | 1  | 3 | 3 | 2 | 4547 | 507.7 | 5.22  | 8.49  | 3 | 1 |
| 3.93E+18 | IsMasterProtein | A0A8C5CQA7 | Phosphodiesterase OS=Gadus morhua OX=8049 GN=pde8a PE=3 SV=1                                                                                     | 5  | 2 | 2 | 2 | 786  | 88.2  | 6.51  | 4.79  | 2 | 1 |
| 3.93E+18 | IsMasterProtein | A0A8C4ZDH7 | NF-kappa-B inhibitor alpha-like OS=Gadus morhua OX=8049 GN=LOC115534369 PE=4 SV=1                                                                | 7  | 2 | 3 | 2 | 313  | 35.5  | 5.03  | 6.45  | 2 | 1 |
| 3.93E+18 | IsMasterProtein | A0A8C5BUU6 | Zinc finger protein ZXC-like OS=Gadus morhua OX=8049 GN=si:dkay-156n14.3 PE=4 SV=1                                                               | 3  | 2 | 3 | 2 | 1351 | 145.3 | 6.83  | 8.72  | 2 | 1 |
| 3.94E+18 | IsMasterProtein | A0A8C5F553 | Proteasome subunit beta OS=Gadus morhua OX=8049 GN=psmb12 PE=3 SV=1                                                                              | 12 | 2 | 2 | 2 | 214  | 22.9  | 6.95  | 5.37  | 2 | 1 |
| 3.95E+18 | IsMasterProtein | A0A8C4ZKE1 | Uncharacterized protein OS=Gadus morhua OX=8049 PE=4 SV=1                                                                                        | 3  | 2 | 3 | 2 | 936  | 105.3 | 7.83  | 6.57  | 2 | 1 |
| 3.97E+18 | IsMasterProtein | A0A8C4ZJ44 | Calponin OS=Gadus morhua OX=8049 GN=cnn1 PE=3 SV=1                                                                                               | 9  | 2 | 2 | 2 | 297  | 33.3  | 8.88  | 4.1   | 2 | 1 |
| 3.97E+18 | IsMasterProtein | A0A8C5BYP3 | RING-type E3 ubiquitin transferase OS=Gadus morhua OX=8049 GN=rc3h1b PE=4 SV=1                                                                   | 5  | 2 | 2 | 2 | 1145 | 125.6 | 7.53  | 5.67  | 2 | 1 |
| 4E+18    | IsMasterProtein | A0A8C5A2D3 | Spindle and centriole-associated protein 1 OS=Gadus morhua OX=8049 PE=4 SV=1                                                                     | 6  | 2 | 2 | 2 | 718  | 76    | 7.55  | 4.8   | 2 | 1 |
| 4.04E+18 | IsMasterProtein | A0A8C5AVU2 | [Histone H3]-lysine(4) N-methyltransferase OS=Gadus morhua OX=8049 PE=4 SV=1                                                                     | 1  | 2 | 2 | 2 | 3980 | 433.5 | 7.31  | 4.59  | 2 | 1 |
| 4.06E+18 | IsMasterProtein | A0A8C4Z1C3 | Lysophosphatidylcholine acyltransferase 4 OS=Gadus morhua OX=8049 GN=lpcat4 PE=3 SV=1                                                            | 4  | 2 | 2 | 2 | 518  | 57    | 8.84  | 5.08  | 2 | 1 |
| 4.08E+18 | IsMasterProtein | A0A8C5FFG9 | Uncharacterized protein OS=Gadus morhua OX=8049 PE=4 SV=1                                                                                        | 13 | 2 | 2 | 2 | 257  | 28.8  | 9.66  | 5.25  | 2 | 1 |
| 4.08E+18 | IsMasterProtein | A0A8C5CMJ9 | F-box protein 43 OS=Gadus morhua OX=8049 GN=FBXO43 PE=4 SV=1                                                                                     | 4  | 2 | 2 | 2 | 714  | 77.8  | 9.11  | 4.1   | 2 | 1 |
| 4.1E+18  | IsMasterProtein | A0A8C5AT86 | THO complex subunit 4-like OS=Gadus morhua OX=8049 GN=LOC115540441 PE=4 SV=1                                                                     | 11 | 2 | 2 | 2 | 275  | 29.1  | 10.05 | 7.23  | 2 | 1 |
| 4.12E+18 | IsMasterProtein | A0A8C4Z526 | Retinol binding protein 3 OS=Gadus morhua OX=8049 GN=rbp3 PE=4 SV=1                                                                              | 6  | 2 | 2 | 2 | 617  | 66.9  | 5.27  | 5.42  | 2 | 1 |
| 4.13E+18 | IsMasterProtein | A0A8C5BT72 | SWI/SNF related, matrix associated, actin dependent regulator of chromatin, subfamily c, member 1a OS=Gadus morhua OX=8049 GN=smarcc1a PE=4 SV=1 | 5  | 3 | 5 | 2 | 965  | 108   | 6.29  | 14.51 | 3 | 1 |
| 4.15E+18 | IsMasterProtein | A0A8C5FGF5 | NMDA receptor synaptonuclear signaling and neuronal migration factor OS=Gadus morhua OX=8049 GN=NSMF PE=4 SV=1                                   | 6  | 2 | 2 | 2 | 484  | 54.7  | 7.77  | 4.83  | 2 | 1 |
| 4.15E+18 | IsMasterProtein | A0A8C5F3J7 | Calmodulin regulated spectrin-associated protein family, member 2a OS=Gadus morhua OX=8049 PE=3 SV=1                                             | 2  | 2 | 2 | 2 | 1349 | 148.1 | 7.65  | 4.62  | 2 | 1 |
| 4.15E+18 | IsMasterProtein | A0A8C4Z1X1 | Ubiquitin protein ligase E3A OS=Gadus morhua OX=8049 PE=4 SV=1                                                                                   | 7  | 2 | 2 | 2 | 802  | 90.4  | 4.79  | 6.37  | 2 | 1 |
| 4.16E+18 | IsMasterProtein | A0A8C5F4Y2 | Tensin 2a OS=Gadus morhua OX=8049 PE=3 SV=1                                                                                                      | 4  | 2 | 2 | 2 | 1082 | 119.6 | 9.82  | 4.85  | 2 | 1 |
| 4.16E+18 | IsMasterProtein | A0A8C4YY02 | Thrombospondin, type I, domain containing 1 OS=Gadus morhua OX=8049 PE=4 SV=1                                                                    | 3  | 2 | 2 | 2 | 930  | 99.8  | 8.66  | 4.29  | 2 | 1 |
| 4.18E+18 | IsMasterProtein | A0A8C5FUX1 | UTP6 small subunit processome component OS=Gadus morhua OX=8049 GN=utp6 PE=3 SV=1                                                                | 6  | 2 | 2 | 2 | 544  | 62.9  | 8.54  | 4.69  | 2 | 1 |
| 4.18E+18 | IsMasterProtein | A0A8C4Z650 | Cyclin-dependent kinase inhibitor 2C (p18, inhibits CDK4) OS=Gadus morhua OX=8049 PE=4 SV=1                                                      | 12 | 2 | 2 | 2 | 156  | 16.8  | 6.32  | 5.46  | 2 | 1 |
| 4.19E+18 | IsMasterProtein | A0A8C5CJ64 | 5'-nucleotidase OS=Gadus morhua OX=8049 GN=nt5c3a PE=3 SV=1                                                                                      | 11 | 2 | 2 | 2 | 403  | 45.8  | 6.47  | 4.72  | 2 | 1 |
| 4.22E+18 | IsMasterProtein | A0A8C5C234 | Coiled-coil domain containing 9 OS=Gadus morhua OX=8049 GN=ccdc9 PE=4 SV=1                                                                       | 11 | 2 | 2 | 2 | 389  | 42.9  | 9.1   | 4.74  | 2 | 1 |

|          |                 |            |                                                                                             |    |    |    |   |      |       |       |        |    |   |
|----------|-----------------|------------|---------------------------------------------------------------------------------------------|----|----|----|---|------|-------|-------|--------|----|---|
| 4.23E+18 | IsMasterProtein | A0A8C5B1L3 | C2H2-type domain-containing protein OS=Gadus morhua OX=8049 PE=4 SV=1                       | 12 | 2  | 2  | 2 | 395  | 42.9  | 8.07  | 5.35   | 2  | 1 |
| 4.25E+18 | IsMasterProtein | A0A8C5A8F9 | Uncharacterized protein OS=Gadus morhua OX=8049 PE=4 SV=1                                   | 6  | 2  | 2  | 2 | 785  | 89.2  | 5.48  | 5.15   | 2  | 1 |
| 4.29E+18 | IsMasterProtein | B3F9U6     | Hemoglobin beta chain OS=Gadus morhua OX=8049 PE=3 SV=1                                     | 73 | 11 | 63 | 2 | 147  | 16.7  | 7.02  | 239.48 | 11 | 1 |
| 4.29E+18 | IsMasterProtein | A0A8C4ZSF1 | B-related factor 1 OS=Gadus morhua OX=8049 PE=3 SV=1                                        | 6  | 2  | 2  | 2 | 620  | 67.6  | 6.51  | 4.85   | 2  | 1 |
| 4.3E+18  | IsMasterProtein | A0A8C5F986 | Uncharacterized protein OS=Gadus morhua OX=8049 PE=4 SV=1                                   | 6  | 2  | 2  | 2 | 529  | 57    | 8.06  | 4.11   | 2  | 1 |
| 4.32E+18 | IsMasterProtein | A0A8C5BXZ4 | Filensin OS=Gadus morhua OX=8049 GN=BFSP1 PE=4 SV=1                                         | 3  | 2  | 2  | 2 | 673  | 74.9  | 5.76  | 4.2    | 2  | 1 |
| 4.33E+18 | IsMasterProtein | A0A8C5BBF5 | Vitellogenin domain-containing protein OS=Gadus morhua OX=8049 PE=4 SV=1                    | 2  | 2  | 2  | 2 | 2669 | 295.4 | 8.85  | 5.99   | 2  | 1 |
| 4.33E+18 | IsMasterProtein | A0A8C5AF95 | Kinase OS=Gadus morhua OX=8049 GN=itpkb PE=3 SV=1                                           | 2  | 2  | 2  | 2 | 834  | 91.8  | 6.44  | 4.62   | 2  | 1 |
| 4.34E+18 | IsMasterProtein | A0A8C5F8L1 | 60S ribosomal protein L28 OS=Gadus morhua OX=8049 GN=rpl28 PE=3 SV=1                        | 12 | 2  | 2  | 2 | 137  | 15.5  | 11.91 | 4.86   | 2  | 1 |
| 4.34E+18 | IsMasterProtein | A0A8C5BDU0 | Uncharacterized protein OS=Gadus morhua OX=8049 PE=4 SV=1                                   | 12 | 2  | 3  | 2 | 434  | 43.4  | 11.85 | 8.33   | 2  | 1 |
| 4.35E+18 | IsMasterProtein | A0A8C4ZT74 | 3-hydroxyanthranilate 3,4-dioxygenase OS=Gadus morhua OX=8049 GN=HAAO PE=3 SV=1             | 10 | 2  | 3  | 2 | 287  | 33.2  | 5.06  | 8.11   | 2  | 1 |
| 4.37E+18 | IsMasterProtein | A0A8C4YVD2 | ANAPC4 WD40 domain-containing protein OS=Gadus morhua OX=8049 PE=4 SV=1                     | 6  | 2  | 2  | 2 | 577  | 65    | 6.74  | 5.48   | 2  | 1 |
| 4.39E+18 | IsMasterProtein | A0A8C4Z9Z8 | Receptor-type tyrosine-protein phosphatase alpha OS=Gadus morhua OX=8049 GN=ptpra PE=3 SV=1 | 5  | 2  | 2  | 2 | 794  | 90.3  | 7.96  | 5.05   | 2  | 1 |
| 4.39E+18 | IsMasterProtein | A0A8C5AVA5 | Zinc finger protein 219 OS=Gadus morhua OX=8049 GN=znf219 PE=4 SV=1                         | 3  | 2  | 2  | 2 | 1337 | 137.4 | 6.62  | 4.73   | 2  | 1 |
| 4.41E+18 | IsMasterProtein | A0A8C5CSS3 | E3 ubiquitin-protein ligase OS=Gadus morhua OX=8049 GN=itcha PE=4 SV=1                      | 4  | 2  | 2  | 2 | 827  | 95.8  | 7.93  | 5.91   | 2  | 1 |
| 4.45E+18 | IsMasterProtein | A0A8C4Z259 | Neuronal pentraxin IIb OS=Gadus morhua OX=8049 GN=nptx2b PE=4 SV=1                          | 5  | 2  | 2  | 2 | 438  | 48.5  | 6.3   | 4.12   | 2  | 1 |
| 4.46E+18 | IsMasterProtein | A0A8C5A927 | Phosphodiesterase OS=Gadus morhua OX=8049 GN=PDE1C PE=3 SV=1                                | 5  | 2  | 2  | 2 | 648  | 73.9  | 9.16  | 4.88   | 2  | 1 |
| 4.47E+18 | IsMasterProtein | A0A8C5CS48 | Microtubule-associated protein 9 OS=Gadus morhua OX=8049 GN=map9 PE=4 SV=1                  | 4  | 2  | 2  | 2 | 656  | 73.4  | 9.13  | 4.07   | 2  | 1 |
| 4.47E+18 | IsMasterProtein | A0A8C5CX35 | Uncharacterized protein OS=Gadus morhua OX=8049 PE=4 SV=1                                   | 9  | 2  | 2  | 2 | 419  | 44.6  | 9.82  | 4.86   | 2  | 1 |
| 4.5E+18  | IsMasterProtein | A0A8C4ZCG2 | Vacuolar protein sorting 26 homolog B, like OS=Gadus morhua OX=8049 GN=VPS26B PE=3 SV=1     | 14 | 2  | 2  | 2 | 329  | 38.1  | 7.34  | 5.51   | 2  | 1 |
| 4.51E+18 | IsMasterProtein | A0A8C5A4D4 | CCHC-type domain-containing protein OS=Gadus morhua OX=8049 PE=4 SV=1                       | 11 | 2  | 3  | 2 | 374  | 42.3  | 5.21  | 5.42   | 2  | 1 |
| 4.57E+18 | IsMasterProtein | A0A8C4Z408 | Glutamate-rich WD repeat containing 1 OS=Gadus morhua OX=8049 GN=grwd1 PE=4 SV=1            | 7  | 2  | 2  | 2 | 449  | 49.7  | 4.56  | 6.24   | 2  | 1 |
| 4.59E+18 | IsMasterProtein | A0A8C5CZ70 | Si:ch211-63p21.8 OS=Gadus morhua OX=8049 PE=4 SV=1                                          | 5  | 2  | 2  | 2 | 665  | 68.1  | 5.94  | 4.64   | 2  | 1 |
| 4.61E+18 | IsMasterProtein | A0A8C5A499 | Uncharacterized protein OS=Gadus morhua OX=8049 PE=4 SV=1                                   | 11 | 2  | 2  | 2 | 517  | 56.4  | 6.95  | 5.25   | 2  | 1 |
| 4.63E+18 | IsMasterProtein | A0A8C5FU86 | Mex-3 RNA binding family member D OS=Gadus morhua OX=8049 GN=MEX3D PE=4 SV=1                | 8  | 2  | 2  | 2 | 499  | 52.6  | 6.29  | 4.7    | 2  | 1 |
| 4.66E+18 | IsMasterProtein | A0A8C5A010 | Uncharacterized protein OS=Gadus morhua OX=8049 PE=3 SV=1                                   | 4  | 2  | 2  | 2 | 1013 | 113.6 | 7.18  | 4.82   | 2  | 1 |
| 4.68E+18 | IsMasterProtein | A0A8C5BVU7 | Ribonuclease H OS=Gadus morhua OX=8049 PE=3 SV=1                                            | 4  | 2  | 2  | 2 | 1216 | 135   | 9.19  | 5.76   | 2  | 1 |
| 4.72E+18 | IsMasterProtein | A0A8C5FFT5 | Peroxisomal targeting signal 1 receptor OS=Gadus morhua OX=8049 GN=pex5 PE=3 SV=1           | 5  | 2  | 2  | 2 | 546  | 60.2  | 4.65  | 5.34   | 2  | 1 |
| 4.74E+18 | IsMasterProtein | A0A8C5CZC6 | Ligand-dependent corepressor-like OS=Gadus morhua OX=8049 GN=wu:fc17b08 PE=4 SV=1           | 5  | 2  | 2  | 2 | 666  | 73.3  | 5.94  | 4.26   | 2  | 1 |
| 4.74E+18 | IsMasterProtein | A0A8C5AWN5 | Keratin, type I cytoskeletal 18-like OS=Gadus morhua OX=8049 GN=LOC115539996 PE=4 SV=1      | 7  | 2  | 3  | 2 | 427  | 48.3  | 6.29  | 7.41   | 2  | 1 |
| 4.75E+18 | IsMasterProtein | A0A8C4Z7H3 | PHD finger protein 8 OS=Gadus morhua OX=8049 GN=PHF8 PE=3 SV=1                              | 4  | 2  | 2  | 2 | 1003 | 109.8 | 9.11  | 5.34   | 2  | 1 |
| 4.79E+18 | IsMasterProtein | A0A8C5F6E2 | Glycerol-3-phosphate dehydrogenase [NAD(+)] OS=Gadus morhua OX=8049 PE=3 SV=1               | 15 | 2  | 2  | 2 | 352  | 38.2  | 6.44  | 6.42   | 2  | 1 |
| 4.82E+18 | IsMasterProtein | A0A8C5AGU2 | Neoverrucotoxin subunit beta-like OS=Gadus morhua OX=8049 GN=LOC115550890 PE=4 SV=1         | 15 | 6  | 13 | 2 | 343  | 37.8  | 5.25  | 36.59  | 6  | 1 |
| 4.89E+18 | IsMasterProtein | A0A8C5FSR7 | Cobl domain-containing protein OS=Gadus morhua OX=8049 PE=4 SV=1                            | 3  | 2  | 2  | 2 | 917  | 91.8  | 9.67  | 4.85   | 2  | 1 |
| 4.93E+18 | IsMasterProtein | A0A8C5BTE5 | Uncharacterized protein OS=Gadus morhua OX=8049 PE=4 SV=1                                   | 4  | 2  | 2  | 2 | 1073 | 116.6 | 9.99  | 5.06   | 2  | 1 |
| 4.96E+18 | IsMasterProtein | A0A8C5FPD5 | C2H2-type domain-containing protein OS=Gadus morhua OX=8049 PE=4 SV=1                       | 4  | 2  | 2  | 2 | 582  | 65.2  | 9     | 4.07   | 2  | 1 |

|          |                 |             |                                                                                                       |    |   |   |   |      |       |       |       |   |   |
|----------|-----------------|-------------|-------------------------------------------------------------------------------------------------------|----|---|---|---|------|-------|-------|-------|---|---|
| 4.97E+18 | IsMasterProtein | A0A8C5C8K6  | Pecanex-like protein OS=Gadus morhua OX=8049 PE=3 SV=1                                                | 4  | 2 | 2 | 2 | 838  | 86.4  | 9.54  | 5.16  | 2 | 1 |
| 4.98E+18 | IsMasterProtein | A0A8C5BNR3  | Family with sequence similarity 126 member B OS=Gadus morhua OX=8049 GN=fam126b PE=3 SV=1             | 14 | 2 | 3 | 2 | 374  | 41.4  | 9.23  | 5.16  | 2 | 1 |
| 4.98E+18 | IsMasterProtein | A0A8C5C056  | Protein naked cuticle homolog OS=Gadus morhua OX=8049 GN=nkd1 PE=3 SV=1                               | 6  | 2 | 3 | 2 | 502  | 55.3  | 8.79  | 7.18  | 2 | 1 |
| 4.99E+18 | IsMasterProtein | A0A8C5CQ38  | Voltage-dependent L-type calcium channel subunit alpha OS=Gadus morhua OX=8049 PE=3 SV=1              | 2  | 2 | 2 | 2 | 1837 | 205.6 | 8.24  | 4.72  | 2 | 1 |
| 5.04E+18 | IsMasterProtein | A0A8C4ZDG4  | Non-SMC condensin II complex, subunit D3 OS=Gadus morhua OX=8049 GN=ncapd3 PE=4 SV=1                  | 5  | 2 | 2 | 2 | 1390 | 155.6 | 6.96  | 6.46  | 2 | 1 |
| 5.07E+18 | IsMasterProtein | A0A8C5FLR1  | Integrin, alpha 3b OS=Gadus morhua OX=8049 GN=itga3b PE=3 SV=1                                        | 5  | 2 | 2 | 2 | 1071 | 119.2 | 5.58  | 4.81  | 2 | 1 |
| 5.09E+18 | IsMasterProtein | A0A8C5ADL3  | Motor neuron and pancreas homeobox 2b OS=Gadus morhua OX=8049 GN=mnx2b PE=4 SV=1                      | 12 | 2 | 2 | 2 | 433  | 48.4  | 9.16  | 4.99  | 2 | 1 |
| 5.11E+18 | IsMasterProtein | A0A8C5ACY5  | Aryl-hydrocarbon receptor nuclear translocator 2 OS=Gadus morhua OX=8049 GN=arnt2 PE=4 SV=1           | 8  | 2 | 2 | 2 | 719  | 78.7  | 6.58  | 5.51  | 2 | 1 |
| 5.11E+18 | IsMasterProtein | cRAP_P02788 | Lactotransferrin OS=Homo sapiens GN=LTF PE=1 SV=6                                                     | 9  | 2 | 2 | 2 | 710  | 78.1  | 8.12  | 7.62  | 2 | 1 |
| 5.14E+18 | IsMasterProtein | A0A8C4Z271  | Zinc finger protein 217 OS=Gadus morhua OX=8049 GN=znf217 PE=4 SV=1                                   | 3  | 2 | 2 | 2 | 929  | 103.8 | 8.53  | 4.58  | 2 | 1 |
| 5.14E+18 | IsMasterProtein | A0A8C4Z3V2  | Capicua transcriptional repressor b OS=Gadus morhua OX=8049 GN=cicb PE=4 SV=1                         | 2  | 2 | 2 | 2 | 1931 | 206.3 | 9.11  | 6.22  | 2 | 1 |
| 5.15E+18 | IsMasterProtein | A0A8C4ZZF2  | Coatomer subunit delta OS=Gadus morhua OX=8049 GN=arcn1b PE=3 SV=1                                    | 4  | 2 | 2 | 2 | 510  | 56.7  | 5.76  | 6.15  | 2 | 1 |
| 5.16E+18 | IsMasterProtein | A0A8C5CKB2  | tRNA-splicing endonuclease subunit Sen34 OS=Gadus morhua OX=8049 PE=3 SV=1                            | 15 | 2 | 2 | 2 | 305  | 32.7  | 7.84  | 4.85  | 2 | 1 |
| 5.19E+18 | IsMasterProtein | A0A8C5F7N7  | Cyclin A2 OS=Gadus morhua OX=8049 GN=CCNA2 PE=3 SV=1                                                  | 8  | 2 | 2 | 2 | 434  | 48.3  | 6.37  | 4.84  | 2 | 1 |
| 5.21E+18 | IsMasterProtein | A0A8C5BG64  | Ig-like domain-containing protein OS=Gadus morhua OX=8049 PE=4 SV=1                                   | 62 | 3 | 4 | 2 | 94   | 10.5  | 7.28  | 11.05 | 3 | 1 |
| 5.21E+18 | IsMasterProtein | A0A8C5F4T6  | 40S ribosomal protein S26 OS=Gadus morhua OX=8049 GN=tps26 PE=3 SV=1                                  | 16 | 2 | 2 | 2 | 115  | 13    | 10.86 | 4.53  | 2 | 1 |
| 5.24E+18 | IsMasterProtein | A0A8C4ZUG8  | G protein-coupled receptor kinase OS=Gadus morhua OX=8049 GN=grk6 PE=3 SV=1                           | 8  | 2 | 2 | 2 | 539  | 61.4  | 7.28  | 5.74  | 2 | 1 |
| 5.28E+18 | IsMasterProtein | A0A8C5FQP0  | GTPase Era, mitochondrial OS=Gadus morhua OX=8049 GN=eral1 PE=3 SV=1                                  | 7  | 2 | 3 | 2 | 544  | 59.3  | 7.06  | 5.62  | 2 | 1 |
| 5.29E+18 | IsMasterProtein | A0A8C4ZSH5  | Peptidyl-prolyl cis-trans isomerase OS=Gadus morhua OX=8049 GN=ppib PE=3 SV=1                         | 10 | 2 | 2 | 2 | 216  | 23.9  | 9.32  | 5.18  | 2 | 1 |
| 5.31E+18 | IsMasterProtein | A0A8C5FEC7  | Kinesin family member 21A OS=Gadus morhua OX=8049 PE=4 SV=1                                           | 6  | 3 | 3 | 2 | 1159 | 128.6 | 8.09  | 7.54  | 3 | 1 |
| 5.33E+18 | IsMasterProtein | A0A8C4Z6S9  | Laminin, beta 2-like OS=Gadus morhua OX=8049 PE=4 SV=1                                                | 2  | 2 | 2 | 2 | 1794 | 196.9 | 6.71  | 5.1   | 2 | 1 |
| 5.37E+18 | IsMasterProtein | A0A8C5C7Q0  | Voltage-dependent T-type calcium channel subunit alpha OS=Gadus morhua OX=8049 PE=3 SV=1              | 1  | 2 | 2 | 2 | 1754 | 194.5 | 8.1   | 4.44  | 2 | 1 |
| 5.44E+18 | IsMasterProtein | A0A8C5CSW7  | Uncharacterized protein OS=Gadus morhua OX=8049 PE=4 SV=1                                             | 7  | 2 | 2 | 2 | 369  | 38.3  | 6.1   | 4.27  | 2 | 1 |
| 5.45E+18 | IsMasterProtein | A0A8C4ZRA7  | Formin-2-like OS=Gadus morhua OX=8049 GN=FMN2 PE=4 SV=1                                               | 2  | 2 | 2 | 2 | 1520 | 163.7 | 7.9   | 4     | 2 | 1 |
| 5.46E+18 | IsMasterProtein | A0A8C5C685  | Uncharacterized protein OS=Gadus morhua OX=8049 PE=3 SV=1                                             | 4  | 2 | 2 | 2 | 1226 | 138.4 | 6.44  | 6.27  | 2 | 1 |
| 5.49E+18 | IsMasterProtein | A0A8C4Z5Z1  | Uncharacterized protein OS=Gadus morhua OX=8049 PE=4 SV=1                                             | 2  | 2 | 2 | 2 | 1536 | 167.6 | 5.22  | 4.85  | 2 | 1 |
| 5.51E+18 | IsMasterProtein | A0A8C5B7I5  | PRP39 pre-mRNA processing factor 39 homolog (yeast) OS=Gadus morhua OX=8049 GN=prpf39 PE=4 SV=1       | 3  | 2 | 3 | 2 | 789  | 90    | 4.75  | 7.77  | 2 | 1 |
| 5.52E+18 | IsMasterProtein | A0A8C5BU13  | G protein-coupled receptor 156 OS=Gadus morhua OX=8049 PE=3 SV=1                                      | 7  | 2 | 2 | 2 | 646  | 66.6  | 10.49 | 5.74  | 2 | 1 |
| 5.54E+18 | IsMasterProtein | A0A8C4ZI74  | Peptidylprolyl isomerase OS=Gadus morhua OX=8049 GN=fkbp3 PE=4 SV=1                                   | 12 | 2 | 2 | 2 | 222  | 25    | 7.96  | 5.91  | 2 | 1 |
| 5.59E+18 | IsMasterProtein | A0A8C5A412  | SPATA6 domain-containing protein OS=Gadus morhua OX=8049 PE=3 SV=1                                    | 21 | 2 | 2 | 2 | 261  | 27.9  | 10.99 | 5.5   | 2 | 1 |
| 5.6E+18  | IsMasterProtein | A0A8C4ZU70  | Protein tweety homolog OS=Gadus morhua OX=8049 GN=LOC115539884 PE=3 SV=1                              | 5  | 2 | 2 | 2 | 555  | 61.4  | 5.49  | 5.22  | 2 | 1 |
| 5.61E+18 | IsMasterProtein | K7P8I8      | Corticotropin-releasing hormone (Fragment) OS=Gadus morhua OX=8049 PE=2 SV=1                          | 28 | 2 | 2 | 2 | 161  | 18.4  | 8.22  | 5.88  | 2 | 1 |
| 5.61E+18 | IsMasterProtein | A0A8C5B4T8  | Uncharacterized protein OS=Gadus morhua OX=8049 PE=4 SV=1                                             | 4  | 2 | 2 | 2 | 487  | 53.6  | 8.65  | 4.38  | 2 | 1 |
| 5.63E+18 | IsMasterProtein | A0A8C4ZPM7  | Post-glycosylphosphatidylinositol attachment to proteins 6 OS=Gadus morhua OX=8049 GN=pgap6 PE=3 SV=1 | 5  | 2 | 2 | 2 | 765  | 83.2  | 7.56  | 4.88  | 2 | 1 |
| 5.64E+18 | IsMasterProtein | A0A8C4ZED9  | Zona pellucida sperm-binding protein 3 OS=Gadus morhua OX=8049 GN=LOC115551355 PE=3 SV=1              | 5  | 2 | 2 | 2 | 421  | 46.2  | 5.58  | 4.79  | 2 | 1 |



|          |                 |            |                                                                                                                  |    |   |   |   |      |       |      |       |   |   |
|----------|-----------------|------------|------------------------------------------------------------------------------------------------------------------|----|---|---|---|------|-------|------|-------|---|---|
| 5.65E+18 | IsMasterProtein | A0A8C5B536 | Fish-egg lectin-like OS=Gadus morhua OX=8049 GN=LOC115543029 PE=4 SV=1                                           | 23 | 2 | 2 | 2 | 262  | 28.5  | 9.51 | 6.53  | 2 | 1 |
| 5.65E+18 | IsMasterProtein | A0A8C5BYM5 | Phosphatidylinositol-4,5-bisphosphate 3-kinase OS=Gadus morhua OX=8049 GN=pik3cg PE=3 SV=1                       | 4  | 2 | 2 | 2 | 1089 | 124.6 | 7.23 | 5.54  | 2 | 1 |
| 5.66E+18 | IsMasterProtein | A0A8C4Z5J3 | ADAM metalloproteinase with thrombospondin type 1 motif, 18 OS=Gadus morhua OX=8049 GN=adamts18 PE=4 SV=1        | 5  | 2 | 2 | 2 | 897  | 97.8  | 8.28 | 5.26  | 2 | 1 |
| 5.66E+18 | IsMasterProtein | A0A8C5BB43 | SET binding factor 1 OS=Gadus morhua OX=8049 GN=sbf1 PE=3 SV=1                                                   | 5  | 5 | 5 | 2 | 1892 | 211.5 | 6.9  | 13.2  | 5 | 1 |
| 5.67E+18 | IsMasterProtein | A0A8C5AXD8 | Glutamate receptor, metabotropic 3 OS=Gadus morhua OX=8049 PE=4 SV=1                                             | 10 | 2 | 2 | 2 | 402  | 44.2  | 5.95 | 5.25  | 2 | 1 |
| 5.67E+18 | IsMasterProtein | A0A8C5BAK9 | F-actin monooxygenase OS=Gadus morhua OX=8049 PE=3 SV=1                                                          | 2  | 3 | 3 | 2 | 2005 | 221.5 | 8.31 | 6.89  | 3 | 1 |
| 5.7E+18  | IsMasterProtein | A0A8C5BGL5 | Myosin IXB OS=Gadus morhua OX=8049 GN=myo9b PE=3 SV=1                                                            | 2  | 2 | 2 | 2 | 2323 | 261.8 | 7.91 | 5.94  | 2 | 1 |
| 5.73E+18 | IsMasterProtein | A0A8C4Z7Y3 | Proteasome subunit beta OS=Gadus morhua OX=8049 PE=3 SV=1                                                        | 11 | 2 | 2 | 2 | 257  | 28.5  | 6.7  | 4.9   | 2 | 1 |
| 5.74E+18 | IsMasterProtein | A0A8C4ZNG8 | ELAV-like protein OS=Gadus morhua OX=8049 GN=elavl1a PE=3 SV=1                                                   | 8  | 2 | 2 | 2 | 364  | 40.1  | 9.29 | 5.57  | 2 | 1 |
| 5.78E+18 | IsMasterProtein | A0A8C4ZIB2 | Retinol dehydrogenase 12-like OS=Gadus morhua OX=8049 GN=LOC115537065 PE=3 SV=1                                  | 8  | 2 | 2 | 2 | 298  | 32.9  | 8.44 | 4.28  | 2 | 1 |
| 5.78E+18 | IsMasterProtein | A0A8C5F7S0 | Ankyrin repeat and fibronectin type III domain containing 1 OS=Gadus morhua OX=8049 PE=4 SV=1                    | 2  | 2 | 2 | 2 | 1550 | 168.9 | 7.65 | 4.7   | 2 | 1 |
| 5.79E+18 | IsMasterProtein | A0A8C5D1E8 | DNA replication licensing factor MCM5 OS=Gadus morhua OX=8049 GN=mcm5 PE=3 SV=1                                  | 4  | 2 | 2 | 2 | 819  | 90.9  | 7.96 | 5.38  | 2 | 1 |
| 5.83E+18 | IsMasterProtein | A0A8C5F984 | Dynein light intermediate chain OS=Gadus morhua OX=8049 PE=3 SV=1                                                | 6  | 2 | 2 | 2 | 425  | 46.7  | 5.62 | 6.04  | 2 | 1 |
| 5.85E+18 | IsMasterProtein | A0A8C5D2Y1 | GTP binding protein 3, mitochondrial OS=Gadus morhua OX=8049 GN=gtpbp3 PE=3 SV=1                                 | 5  | 2 | 2 | 2 | 537  | 57.2  | 7.24 | 5.96  | 2 | 1 |
| 5.87E+18 | IsMasterProtein | A0A8C5FKH1 | LAM_G DOMAIN domain-containing protein OS=Gadus morhua OX=8049 PE=4 SV=1                                         | 24 | 2 | 2 | 2 | 168  | 19    | 5.17 | 6.26  | 2 | 1 |
| 5.88E+18 | IsMasterProtein | A0A8C5BWQ4 | 116 kDa U5 small nuclear ribonucleoprotein component OS=Gadus morhua OX=8049 GN=eftud2 PE=3 SV=1                 | 4  | 2 | 2 | 2 | 971  | 109.3 | 4.84 | 5.67  | 2 | 1 |
| 5.89E+18 | IsMasterProtein | A0A8C4ZPS7 | Myogenesis regulating glycosidase (putative) OS=Gadus morhua OX=8049 GN=myorg PE=3 SV=1                          | 7  | 2 | 2 | 2 | 684  | 78.6  | 6.84 | 5.73  | 2 | 1 |
| 5.97E+18 | IsMasterProtein | A0A8C5AZS7 | Spinster homolog 3 (Drosophila) OS=Gadus morhua OX=8049 PE=3 SV=1                                                | 11 | 2 | 2 | 2 | 516  | 55.4  | 8.73 | 5.56  | 2 | 1 |
| 5.97E+18 | IsMasterProtein | A0A8C5BPR5 | Transcription factor OS=Gadus morhua OX=8049 GN=LOC115533095 PE=3 SV=1                                           | 9  | 2 | 2 | 2 | 412  | 45.8  | 6.4  | 6.04  | 2 | 1 |
| 5.98E+18 | IsMasterProtein | A0A8C5B9I2 | NADH dehydrogenase [ubiquinone] iron-sulfur protein 3, mitochondrial OS=Gadus morhua OX=8049 GN=ndufs3 PE=3 SV=1 | 10 | 2 | 2 | 2 | 254  | 29.4  | 5.52 | 4.76  | 2 | 1 |
| 6.03E+18 | IsMasterProtein | A0A8C5CWW1 | Ubiquitin carboxyl-terminal hydrolase OS=Gadus morhua OX=8049 PE=3 SV=1                                          | 5  | 2 | 2 | 2 | 795  | 90    | 5.38 | 5.69  | 2 | 1 |
| 6.04E+18 | IsMasterProtein | A0A8C4YYQ7 | Transcription elongation factor SPT5 OS=Gadus morhua OX=8049 GN=supt5h PE=3 SV=1                                 | 3  | 2 | 3 | 2 | 1089 | 119.9 | 5.39 | 6.64  | 2 | 1 |
| 6.08E+18 | IsMasterProtein | A0A8C5F5N6 | Prostaglandin reductase 2 OS=Gadus morhua OX=8049 PE=3 SV=1                                                      | 12 | 2 | 2 | 2 | 344  | 37    | 5.22 | 4.74  | 2 | 1 |
| 6.09E+18 | IsMasterProtein | A0A8C4YVE5 | N-acetylneuraminic acid synthase a OS=Gadus morhua OX=8049 GN=nansa PE=3 SV=1                                    | 8  | 2 | 2 | 2 | 359  | 39.9  | 7.09 | 6.78  | 2 | 1 |
| 6.14E+18 | IsMasterProtein | A0A8C5F815 | Immunoglobulin superfamily, DCC subclass, member 4 OS=Gadus morhua OX=8049 GN=igdc4 PE=4 SV=1                    | 3  | 2 | 2 | 2 | 1245 | 134.5 | 6.81 | 4.97  | 2 | 1 |
| 6.17E+18 | IsMasterProtein | A0A8C4ZMK2 | Protein kinase domain-containing protein OS=Gadus morhua OX=8049 PE=3 SV=1                                       | 11 | 2 | 2 | 2 | 418  | 46.8  | 7.81 | 4.97  | 2 | 1 |
| 6.2E+18  | IsMasterProtein | A0A8C5CYY8 | Ig-like domain-containing protein OS=Gadus morhua OX=8049 PE=4 SV=1                                              | 9  | 2 | 2 | 2 | 236  | 26.8  | 5.8  | 4.54  | 2 | 1 |
| 6.24E+18 | IsMasterProtein | A0A8C5AFF9 | Polypyrimidine tract-binding protein 2-like OS=Gadus morhua OX=8049 GN=LOC115549227 PE=4 SV=1                    | 5  | 2 | 2 | 2 | 491  | 53.4  | 8.37 | 4.39  | 2 | 1 |
| 6.24E+18 | IsMasterProtein | A0A8C5A9P9 | Cyclin-dependent kinase 13 OS=Gadus morhua OX=8049 GN=cdk13 PE=4 SV=1                                            | 3  | 3 | 4 | 2 | 1417 | 154.6 | 9.79 | 10.12 | 3 | 1 |
| 6.26E+18 | IsMasterProtein | A0A8C5AMP2 | Lysine--tRNA ligase OS=Gadus morhua OX=8049 GN=kars1 PE=3 SV=1                                                   | 5  | 2 | 3 | 2 | 578  | 65.9  | 5.82 | 8.8   | 2 | 1 |
| 6.26E+18 | IsMasterProtein | A0A8C5AMD8 | Uncharacterized protein OS=Gadus morhua OX=8049 PE=4 SV=1                                                        | 1  | 2 | 2 | 2 | 4435 | 480.1 | 7.34 | 5.6   | 2 | 1 |
| 6.26E+18 | IsMasterProtein | A0A8C5ADK2 | Protocadherin alpha-C2-like OS=Gadus morhua OX=8049 GN=LOC115552445 PE=4 SV=1                                    | 4  | 2 | 2 | 2 | 880  | 96.4  | 5.17 | 4.85  | 2 | 1 |
| 6.27E+18 | IsMasterProtein | A0A8C4ZA68 | Secretogranin-3 OS=Gadus morhua OX=8049 GN=scg3 PE=4 SV=1                                                        | 8  | 2 | 2 | 2 | 504  | 56.2  | 4.49 | 5.23  | 2 | 1 |
| 6.29E+18 | IsMasterProtein | A0A8C4ZWD9 | DNA helicase OS=Gadus morhua OX=8049 PE=3 SV=1                                                                   | 2  | 2 | 2 | 2 | 1659 | 186.7 | 5.91 | 5.2   | 2 | 1 |

|          |                 |            |                                                                                                    |    |   |    |   |      |       |       |       |   |   |
|----------|-----------------|------------|----------------------------------------------------------------------------------------------------|----|---|----|---|------|-------|-------|-------|---|---|
| 6.3E+18  | IsMasterProtein | A0A8C4ZXL4 | Wiskott-Aldrich syndrome protein-like OS=Gadus morhua OX=8049 GN=LOC115545051 PE=4 SV=1            | 10 | 2 | 2  | 2 | 561  | 59.6  | 7.18  | 5.62  | 2 | 1 |
| 6.32E+18 | IsMasterProtein | A0A8C5BMR1 | BCL2 associated athanogene 5 OS=Gadus morhua OX=8049 GN=bag5 PE=4 SV=1                             | 5  | 2 | 2  | 2 | 522  | 58.7  | 7.03  | 4.74  | 2 | 1 |
| 6.32E+18 | IsMasterProtein | A0A8C4ZA54 | Serine protease 16 OS=Gadus morhua OX=8049 PE=3 SV=1                                               | 4  | 2 | 2  | 2 | 480  | 53.8  | 6.52  | 5.32  | 2 | 1 |
| 6.35E+18 | IsMasterProtein | A0A8C4ZAX1 | Kinesin family member 26Ab OS=Gadus morhua OX=8049 PE=3 SV=1                                       | 1  | 2 | 2  | 2 | 1974 | 210.6 | 8.81  | 4.14  | 2 | 1 |
| 6.36E+18 | IsMasterProtein | A0A8C5FPZ0 | Homeobox protein MSX-2-like OS=Gadus morhua OX=8049 GN=LOC115551854 PE=4 SV=1                      | 14 | 2 | 2  | 2 | 259  | 29    | 10.07 | 4.75  | 2 | 1 |
| 6.38E+18 | IsMasterProtein | A0A8C5FNA5 | Uncharacterized protein OS=Gadus morhua OX=8049 PE=4 SV=1                                          | 11 | 2 | 2  | 2 | 502  | 55.4  | 5.07  | 6.79  | 2 | 1 |
| 6.4E+18  | IsMasterProtein | A0A8C5BGB6 | Isovaleryl-CoA dehydrogenase OS=Gadus morhua OX=8049 PE=3 SV=1                                     | 8  | 2 | 2  | 2 | 391  | 43.2  | 7.3   | 4.71  | 2 | 1 |
| 6.42E+18 | IsMasterProtein | A0A8C4YVS2 | Peptidyl-prolyl cis-trans isomerase OS=Gadus morhua OX=8049 GN=PPIF PE=3 SV=1                      | 13 | 2 | 2  | 2 | 191  | 20.8  | 8.82  | 4.92  | 2 | 1 |
| 6.42E+18 | IsMasterProtein | A0A8C4ZS92 | Dihydropyrimidinase-related protein 2 OS=Gadus morhua OX=8049 GN=DPYSL2 PE=3 SV=1                  | 8  | 2 | 2  | 2 | 505  | 55.2  | 6.01  | 6.11  | 2 | 1 |
| 6.45E+18 | IsMasterProtein | A0A8C4Z444 | Collectin-12 OS=Gadus morhua OX=8049 GN=LOC115537116 PE=4 SV=1                                     | 3  | 2 | 2  | 2 | 725  | 78.4  | 5.16  | 4.78  | 2 | 1 |
| 6.49E+18 | IsMasterProtein | A0A8C5CR06 | Spalt-like transcription factor 3b OS=Gadus morhua OX=8049 GN=sall3b PE=4 SV=1                     | 4  | 2 | 2  | 2 | 1352 | 144   | 6.77  | 5.7   | 2 | 1 |
| 6.5E+18  | IsMasterProtein | A0A8C5AD53 | KRAP_IP3R_bind domain-containing protein OS=Gadus morhua OX=8049 PE=4 SV=1                         | 3  | 2 | 2  | 2 | 1503 | 156.9 | 5.08  | 5.5   | 2 | 1 |
| 6.5E+18  | IsMasterProtein | A0A8C5C089 | Jade family PHD finger 2 OS=Gadus morhua OX=8049 GN=jade2 PE=4 SV=1                                | 5  | 2 | 2  | 2 | 987  | 108.7 | 6.68  | 5.11  | 2 | 1 |
| 6.53E+18 | IsMasterProtein | A0A8C4ZGP2 | HGF activator OS=Gadus morhua OX=8049 GN=HGFAC PE=4 SV=1                                           | 4  | 2 | 2  | 2 | 606  | 67.5  | 8.57  | 4.5   | 2 | 1 |
| 6.59E+18 | IsMasterProtein | A0A8C4Z9D7 | Vacuolar protein sorting 13 homolog D OS=Gadus morhua OX=8049 PE=3 SV=1                            | 1  | 2 | 2  | 2 | 4368 | 484.9 | 6.43  | 4.61  | 2 | 1 |
| 6.66E+18 | IsMasterProtein | A0A8C5AA73 | Uncharacterized protein OS=Gadus morhua OX=8049 PE=3 SV=1                                          | 16 | 9 | 12 | 2 | 691  | 76.3  | 5.55  | 35.97 | 9 | 1 |
| 6.68E+18 | IsMasterProtein | A0A8C5FDS1 | RNA binding motif protein 15B OS=Gadus morhua OX=8049 GN=rbm15b PE=3 SV=1                          | 2  | 2 | 2  | 2 | 884  | 99.2  | 10.04 | 4.5   | 2 | 1 |
| 6.69E+18 | IsMasterProtein | A0A8C5CPG7 | zf-C2H2_12 domain-containing protein OS=Gadus morhua OX=8049 PE=4 SV=1                             | 6  | 2 | 2  | 2 | 591  | 66.6  | 7.9   | 4.75  | 2 | 1 |
| 6.7E+18  | IsMasterProtein | A0A8C5CPU0 | Mediator of RNA polymerase II transcription subunit 13 OS=Gadus morhua OX=8049 GN=MED13L PE=3 SV=1 | 2  | 2 | 2  | 2 | 1793 | 195   | 6.52  | 5.03  | 2 | 1 |
| 6.71E+18 | IsMasterProtein | A0A8C5CGK7 | MAP7 domain containing 1a OS=Gadus morhua OX=8049 GN=map7d1a PE=3 SV=1                             | 6  | 2 | 3  | 2 | 800  | 89.5  | 10.11 | 8.03  | 2 | 1 |
| 6.71E+18 | IsMasterProtein | A0A8C5A399 | Zinc finger protein, FOG family member 2a OS=Gadus morhua OX=8049 GN=zfpm2a PE=4 SV=1              | 4  | 2 | 2  | 2 | 1119 | 122   | 7.17  | 5.24  | 2 | 1 |
| 6.77E+18 | IsMasterProtein | A0A8C5FDF9 | Tyrosine-protein kinase OS=Gadus morhua OX=8049 GN=abl1 PE=3 SV=1                                  | 4  | 2 | 2  | 2 | 1072 | 118.3 | 9.1   | 5.57  | 2 | 1 |
| 6.78E+18 | IsMasterProtein | A0A8C4ZN79 | Uncharacterized protein OS=Gadus morhua OX=8049 PE=4 SV=1                                          | 2  | 2 | 3  | 2 | 652  | 71.5  | 5.36  | 7.86  | 2 | 1 |
| 6.8E+18  | IsMasterProtein | A0A8C5BTP8 | Uncharacterized protein OS=Gadus morhua OX=8049 PE=4 SV=1                                          | 2  | 2 | 2  | 2 | 2115 | 233.9 | 4.82  | 5.29  | 2 | 1 |
| 6.81E+18 | IsMasterProtein | A0A8C5BK69 | Dystrobrevin OS=Gadus morhua OX=8049 PE=3 SV=1                                                     | 5  | 2 | 2  | 2 | 610  | 68.8  | 8.32  | 5.38  | 2 | 1 |
| 6.81E+18 | IsMasterProtein | A0A8C5FH87 | Wnt ligand secretion mediator OS=Gadus morhua OX=8049 GN=wls PE=3 SV=1                             | 9  | 2 | 2  | 2 | 536  | 61.8  | 8.19  | 4.88  | 2 | 1 |
| 6.83E+18 | IsMasterProtein | A0A8C5FNR8 | Tonsoku-like protein OS=Gadus morhua OX=8049 GN=tons1 PE=3 SV=1                                    | 1  | 2 | 2  | 2 | 1495 | 161.3 | 6.62  | 4.91  | 2 | 1 |
| 6.83E+18 | IsMasterProtein | A0A8C4ZX93 | Dimer_Tnp_hAT domain-containing protein OS=Gadus morhua OX=8049 PE=4 SV=1                          | 9  | 2 | 3  | 2 | 493  | 54.4  | 8.72  | 8.26  | 2 | 1 |
| 6.86E+18 | IsMasterProtein | A0A8C5ATN1 | Ras association domain family member 3 OS=Gadus morhua OX=8049 GN=rassf3 PE=4 SV=1                 | 9  | 2 | 4  | 2 | 448  | 50.6  | 8.19  | 10.26 | 2 | 1 |
| 6.87E+18 | IsMasterProtein | A0A8C4ZZ88 | Zyg-11 related, cell cycle regulator OS=Gadus morhua OX=8049 GN=zer1 PE=3 SV=1                     | 5  | 2 | 2  | 2 | 758  | 86.2  | 6.23  | 6.28  | 2 | 1 |
| 6.88E+18 | IsMasterProtein | A0A8C5FBC8 | Uncharacterized protein OS=Gadus morhua OX=8049 PE=3 SV=1                                          | 12 | 2 | 2  | 2 | 500  | 54.7  | 7.68  | 6.23  | 2 | 1 |
| 6.9E+18  | IsMasterProtein | A0A8C5FKE5 | GRIP and coiled-coil domain containing 1 OS=Gadus morhua OX=8049 GN=gcc1 PE=4 SV=1                 | 3  | 2 | 2  | 2 | 840  | 93.3  | 5.58  | 4.16  | 2 | 1 |
| 6.91E+18 | IsMasterProtein | A0A8C5AGP7 | Uncharacterized protein OS=Gadus morhua OX=8049 PE=4 SV=1                                          | 11 | 2 | 2  | 2 | 303  | 33.7  | 9.67  | 5.3   | 2 | 1 |
| 6.91E+18 | IsMasterProtein | A0A8C5FUV6 | Profilin OS=Gadus morhua OX=8049 GN=LOC115529555 PE=3 SV=1                                         | 15 | 2 | 2  | 2 | 150  | 16.5  | 6.55  | 5.84  | 2 | 1 |
| 6.95E+18 | IsMasterProtein | A0A8C5F7I5 | Transmembrane protein 168a OS=Gadus morhua OX=8049 GN=tmem168a PE=3 SV=1                           | 3  | 2 | 2  | 2 | 695  | 76.1  | 7.34  | 4.33  | 2 | 1 |

|          |                 |            |                                                                                                      |    |   |    |   |      |       |       |       |   |   |
|----------|-----------------|------------|------------------------------------------------------------------------------------------------------|----|---|----|---|------|-------|-------|-------|---|---|
| 6.96E+18 | IsMasterProtein | A0A8C5BZ76 | Sin3A-associated protein a OS=Gadus morhua OX=8049 GN=sap130a PE=3 SV=1                              | 6  | 2 | 2  | 2 | 818  | 86.2  | 9.7   | 4.92  | 2 | 1 |
| 6.97E+18 | IsMasterProtein | A0A8C4ZWG7 | Immunoglobulin superfamily, member 8 OS=Gadus morhua OX=8049 GN=igsf8 PE=4 SV=1                      | 7  | 2 | 2  | 2 | 632  | 67.3  | 8.1   | 4.66  | 2 | 1 |
| 6.98E+18 | IsMasterProtein | A0A8C5AZJ5 | Uncharacterized protein OS=Gadus morhua OX=8049 PE=4 SV=1                                            | 8  | 2 | 3  | 2 | 222  | 23.8  | 6.25  | 13.55 | 2 | 1 |
| 7E+18    | IsMasterProtein | A0A8C5FPS8 | tRNA:m(4)X modification enzyme TRM13 OS=Gadus morhua OX=8049 GN=tmt13 PE=3 SV=1                      | 7  | 2 | 2  | 2 | 461  | 51.1  | 7.97  | 4.81  | 2 | 1 |
| 7.01E+18 | IsMasterProtein | A0A8C5C793 | Nucleophosmin OS=Gadus morhua OX=8049 GN=npmla PE=3 SV=1                                             | 11 | 2 | 2  | 2 | 289  | 31.9  | 4.74  | 7.84  | 2 | 1 |
| 7.02E+18 | IsMasterProtein | A0A8C5FUA7 | Uncharacterized protein OS=Gadus morhua OX=8049 PE=3 SV=1                                            | 2  | 4 | 4  | 2 | 3540 | 392.8 | 7.85  | 11.2  | 4 | 1 |
| 7.04E+18 | IsMasterProtein | A0A8C5D078 | Uncharacterized protein OS=Gadus morhua OX=8049 PE=4 SV=1                                            | 3  | 2 | 2  | 2 | 1257 | 148.4 | 9.42  | 4.86  | 2 | 1 |
| 7.06E+18 | IsMasterProtein | A0A8C5CCD4 | Proteasome subunit beta OS=Gadus morhua OX=8049 PE=3 SV=1                                            | 9  | 2 | 2  | 2 | 277  | 30.6  | 8.51  | 5.42  | 2 | 1 |
| 7.08E+18 | IsMasterProtein | A0A8C5C0Y6 | Aa_trans domain-containing protein OS=Gadus morhua OX=8049 PE=4 SV=1                                 | 8  | 2 | 2  | 2 | 441  | 48.8  | 5.57  | 4.6   | 2 | 1 |
| 7.09E+18 | IsMasterProtein | A0A8C4ZHC3 | Carbonic anhydrase OS=Gadus morhua OX=8049 PE=3 SV=1                                                 | 16 | 2 | 2  | 2 | 250  | 28    | 8.1   | 5.37  | 2 | 1 |
| 7.1E+18  | IsMasterProtein | A0A8C4Z8X2 | Uncharacterized protein OS=Gadus morhua OX=8049 PE=4 SV=1                                            | 4  | 2 | 2  | 2 | 760  | 85.3  | 6.87  | 4.75  | 2 | 1 |
| 7.1E+18  | IsMasterProtein | A0A8C4ZSR3 | Ribosomal_L16 domain-containing protein OS=Gadus morhua OX=8049 PE=3 SV=1                            | 15 | 2 | 4  | 2 | 220  | 25.2  | 10.29 | 9.92  | 2 | 1 |
| 7.11E+18 | IsMasterProtein | A0A8C4YW00 | Cytosolic phospholipase A2 gamma-like OS=Gadus morhua OX=8049 GN=LOC115559597 PE=4 SV=1              | 9  | 4 | 4  | 2 | 593  | 66    | 5.08  | 10.67 | 4 | 1 |
| 7.11E+18 | IsMasterProtein | A0A8C5AKB4 | Alkylated DNA repair protein alkB homolog 8 OS=Gadus morhua OX=8049 GN=ALKBH8 PE=3 SV=1              | 6  | 2 | 2  | 2 | 768  | 83.5  | 7.23  | 5.2   | 2 | 1 |
| 7.13E+18 | IsMasterProtein | A0A8C4Z5R2 | DEK proto-oncogene OS=Gadus morhua OX=8049 PE=4 SV=1                                                 | 5  | 2 | 2  | 2 | 388  | 43.3  | 4.92  | 4.88  | 2 | 1 |
| 7.13E+18 | IsMasterProtein | A0A8C5FCY0 | Uncharacterized protein OS=Gadus morhua OX=8049 PE=4 SV=1                                            | 4  | 2 | 2  | 2 | 1065 | 114.5 | 5.33  | 5.9   | 2 | 1 |
| 7.14E+18 | IsMasterProtein | A0A8C4ZKS0 | Enkurin, TRPC channel interacting protein OS=Gadus morhua OX=8049 GN=enkur PE=4 SV=1                 | 8  | 2 | 2  | 2 | 258  | 30.2  | 9.51  | 4.32  | 2 | 1 |
| 7.15E+18 | IsMasterProtein | A0A8C4Z0V5 | WD repeat domain 3 OS=Gadus morhua OX=8049 GN=wdr3 PE=4 SV=1                                         | 6  | 2 | 2  | 2 | 948  | 106.4 | 6.81  | 6.75  | 2 | 1 |
| 7.17E+18 | IsMasterProtein | A0A8C5CD85 | Glutamate receptor OS=Gadus morhua OX=8049 GN=grik1a PE=3 SV=1                                       | 5  | 2 | 2  | 2 | 865  | 98    | 8.41  | 5.16  | 2 | 1 |
| 7.18E+18 | IsMasterProtein | A0A8C4ZAM1 | Aromatase OS=Gadus morhua OX=8049 GN=CYP19A1 PE=3 SV=1                                               | 9  | 2 | 2  | 2 | 514  | 58    | 7.84  | 5.37  | 2 | 1 |
| 7.19E+18 | IsMasterProtein | A0A8C5FA76 | Leucine-rich repeat neuronal protein 3-like OS=Gadus morhua OX=8049 GN=LOC115532564 PE=4 SV=1        | 4  | 2 | 3  | 2 | 709  | 79.3  | 6.06  | 7.27  | 2 | 1 |
| 7.22E+18 | IsMasterProtein | A0A8C5FCX8 | Uncharacterized protein OS=Gadus morhua OX=8049 PE=4 SV=1                                            | 5  | 2 | 2  | 2 | 938  | 106.4 | 9.09  | 6.26  | 2 | 1 |
| 7.23E+18 | IsMasterProtein | A0A8C4YYY2 | Ras-related protein Rab-5C-like OS=Gadus morhua OX=8049 GN=RAB5C PE=4 SV=1                           | 12 | 2 | 2  | 2 | 217  | 23.2  | 7.85  | 5.8   | 2 | 1 |
| 7.26E+18 | IsMasterProtein | A0A8C4Z5M7 | DnaJ (Hsp40) homolog, subfamily C, member 6 OS=Gadus morhua OX=8049 PE=4 SV=1                        | 4  | 2 | 2  | 2 | 906  | 96.4  | 7.87  | 4.61  | 2 | 1 |
| 7.29E+18 | IsMasterProtein | A0A8C4Z5P0 | Uncharacterized LOC115555779 OS=Gadus morhua OX=8049 GN=si:ch211-129c21.1 PE=3 SV=1                  | 5  | 2 | 2  | 2 | 814  | 88.6  | 7.37  | 4.6   | 2 | 1 |
| 7.32E+18 | IsMasterProtein | A0A8C4ZX52 | Abelson helper integration site 1 OS=Gadus morhua OX=8049 GN=ahi1 PE=4 SV=1                          | 4  | 2 | 2  | 2 | 1194 | 132.6 | 8.24  | 5.7   | 2 | 1 |
| 7.32E+18 | IsMasterProtein | A0A8C5FTD4 | Uncharacterized protein OS=Gadus morhua OX=8049 PE=4 SV=1                                            | 12 | 2 | 2  | 2 | 355  | 41.7  | 7.68  | 5.99  | 2 | 1 |
| 7.33E+18 | IsMasterProtein | A0A8C5FIQ8 | Receptor protein-tyrosine kinase OS=Gadus morhua OX=8049 PE=4 SV=1                                   | 6  | 2 | 2  | 2 | 943  | 105.5 | 6.77  | 5.79  | 2 | 1 |
| 7.34E+18 | IsMasterProtein | A0A8C5AJ73 | NFKB repressing factor OS=Gadus morhua OX=8049 GN=NKRF PE=4 SV=1                                     | 3  | 2 | 14 | 2 | 797  | 89.1  | 9.23  | 38.59 | 2 | 1 |
| 7.35E+18 | IsMasterProtein | A0A8C4Z468 | Protein kinase, membrane associated tyrosine/threonine 1 OS=Gadus morhua OX=8049 GN=pkmyt1 PE=4 SV=1 | 3  | 2 | 2  | 2 | 573  | 64    | 8.59  | 4.26  | 2 | 1 |
| 7.37E+18 | IsMasterProtein | A0A8C5FD79 | THAP-type domain-containing protein OS=Gadus morhua OX=8049 PE=3 SV=1                                | 37 | 2 | 2  | 2 | 98   | 11    | 9.94  | 5.28  | 2 | 1 |
| 7.38E+18 | IsMasterProtein | A0A8C5ALF5 | V-type proton ATPase subunit G OS=Gadus morhua OX=8049 GN=atp6v1g1 PE=3 SV=1                         | 17 | 2 | 2  | 2 | 118  | 13.3  | 9.85  | 5.95  | 2 | 1 |
| 7.4E+18  | IsMasterProtein | A0A8C4Z173 | Protocadherin 18a OS=Gadus morhua OX=8049 GN=pcdh18a PE=4 SV=1                                       | 4  | 2 | 3  | 2 | 1270 | 137.1 | 5.47  | 8.99  | 2 | 1 |
| 7.42E+18 | IsMasterProtein | A0A8C4ZMJ0 | Enoyl-CoA delta isomerase 1 OS=Gadus morhua OX=8049 GN=eci1 PE=3 SV=1                                | 12 | 2 | 2  | 2 | 300  | 32.9  | 8.73  | 5.37  | 2 | 1 |
| 7.45E+18 | IsMasterProtein | A0A8C4ZJE9 | L3MBTL histone methyl-lysine binding protein 1b OS=Gadus morhua OX=8049 GN=l3mbtl1b PE=4 SV=1        | 3  | 2 | 2  | 2 | 907  | 98.3  | 6.51  | 4.03  | 2 | 1 |
| 7.49E+18 | IsMasterProtein | A0A8C5CNR7 | Formimidoyltransferase-cyclodeaminase OS=Gadus morhua OX=8049 GN=ftcd PE=3 SV=1                      | 7  | 2 | 2  | 2 | 506  | 54.6  | 5.66  | 5.03  | 2 | 1 |

|          |                 |            |                                                                                                                                      |    |   |   |   |      |       |       |      |   |   |
|----------|-----------------|------------|--------------------------------------------------------------------------------------------------------------------------------------|----|---|---|---|------|-------|-------|------|---|---|
| 7.5E+18  | IsMasterProtein | A0A8C5C6M1 | RUNX family transcription factor 2b OS=Gadus morhua OX=8049 PE=4 SV=1                                                                | 13 | 2 | 3 | 2 | 430  | 47.2  | 9.31  | 8.39 | 2 | 1 |
| 7.51E+18 | IsMasterProtein | A0A8C4ZF88 | GRB10 interacting GYF protein 1a OS=Gadus morhua OX=8049 PE=4 SV=1                                                                   | 6  | 3 | 3 | 2 | 1117 | 123   | 6.02  | 7.41 | 3 | 1 |
| 7.53E+18 | IsMasterProtein | A0A8C5CVA4 | Vitamin K-dependent protein S OS=Gadus morhua OX=8049 GN=pros1 PE=4 SV=1                                                             | 3  | 2 | 2 | 2 | 665  | 73.3  | 5.66  | 4.65 | 2 | 1 |
| 7.54E+18 | IsMasterProtein | A0A8C5FT95 | Myelin basic protein OS=Gadus morhua OX=8049 PE=3 SV=1                                                                               | 20 | 2 | 2 | 2 | 112  | 12.4  | 11.88 | 5.29 | 2 | 1 |
| 7.54E+18 | IsMasterProtein | A0A8C5F4I0 | Glyoxylate reductase/hydroxypyruvate reductase b OS=Gadus morhua OX=8049 GN=grhprb PE=3 SV=1                                         | 15 | 2 | 2 | 2 | 360  | 39.5  | 8.15  | 6.49 | 2 | 1 |
| 7.58E+18 | IsMasterProtein | A0A8C5FMQ8 | Peptidylprolyl isomerase OS=Gadus morhua OX=8049 GN=fkbp15b PE=4 SV=1                                                                | 4  | 2 | 2 | 2 | 1087 | 118.7 | 4.89  | 5.88 | 2 | 1 |
| 7.58E+18 | IsMasterProtein | A0A8C4ZM15 | ESF1, nucleolar pre-rRNA processing protein, homolog (S. cerevisiae) OS=Gadus morhua OX=8049 PE=3 SV=1                               | 3  | 2 | 2 | 2 | 726  | 83.8  | 5.24  | 4.05 | 2 | 1 |
| 7.62E+18 | IsMasterProtein | A0A8C5FB16 | Tyrosine-protein kinase receptor OS=Gadus morhua OX=8049 GN=insra PE=3 SV=1                                                          | 4  | 2 | 2 | 2 | 1357 | 153.4 | 7.21  | 5.15 | 2 | 1 |
| 7.63E+18 | IsMasterProtein | A0A8C5B2I2 | Uncharacterized protein OS=Gadus morhua OX=8049 PE=3 SV=1                                                                            | 1  | 2 | 2 | 2 | 1942 | 216.7 | 6.4   | 4.51 | 2 | 1 |
| 7.63E+18 | IsMasterProtein | A0A8C5BU97 | Bromodomain PHD finger transcription factor OS=Gadus morhua OX=8049 GN=bptf PE=4 SV=1                                                | 1  | 2 | 3 | 2 | 3426 | 373.4 | 7.96  | 7.36 | 2 | 1 |
| 7.66E+18 | IsMasterProtein | A0A8C5C1L1 | Hairy/enhancer-of-split related with YRPW motif protein 1-like OS=Gadus morhua OX=8049 GN=LOC115554452 PE=4 SV=1                     | 10 | 2 | 2 | 2 | 304  | 33.1  | 9.77  | 4.59 | 2 | 1 |
| 7.68E+18 | IsMasterProtein | A0A8C4Z2E3 | Uncharacterized protein OS=Gadus morhua OX=8049 PE=4 SV=1                                                                            | 8  | 2 | 2 | 2 | 599  | 67.5  | 5.9   | 5.72 | 2 | 1 |
| 7.68E+18 | IsMasterProtein | A0A8C5A704 | Sema domain, immunoglobulin domain (Ig), short basic domain, secreted, (semaphorin) 3Aa OS=Gadus morhua OX=8049 GN=sema3aa PE=3 SV=1 | 7  | 2 | 2 | 2 | 676  | 75.1  | 7.72  | 5.36 | 2 | 1 |
| 7.72E+18 | IsMasterProtein | A0A8C5APM9 | Nitric oxide synthase OS=Gadus morhua OX=8049 GN=nos1 PE=3 SV=1                                                                      | 3  | 2 | 2 | 2 | 1424 | 160.2 | 6.96  | 5.35 | 2 | 1 |
| 7.73E+18 | IsMasterProtein | A0A8C4Z1H8 | Uncharacterized protein OS=Gadus morhua OX=8049 PE=4 SV=1                                                                            | 8  | 2 | 2 | 2 | 540  | 60.8  | 6.39  | 5.7  | 2 | 1 |
| 7.76E+18 | IsMasterProtein | A0A8C5C4Z7 | Thyroid hormone receptor associated protein 3b OS=Gadus morhua OX=8049 GN=thrap3b PE=3 SV=1                                          | 3  | 2 | 2 | 2 | 942  | 104.5 | 10.3  | 4.38 | 2 | 1 |
| 7.78E+18 | IsMasterProtein | A0A8C5AG99 | Cramped chromatin regulator homolog 1 OS=Gadus morhua OX=8049 PE=4 SV=1                                                              | 4  | 2 | 2 | 2 | 1043 | 109.5 | 8.37  | 5.29 | 2 | 1 |
| 7.78E+18 | IsMasterProtein | A0A8C4ZC40 | Endoplasmic reticulum transmembrane protein OS=Gadus morhua OX=8049 GN=bcap31 PE=3 SV=1                                              | 11 | 2 | 2 | 2 | 243  | 27.4  | 8.63  | 5.3  | 2 | 1 |
| 7.81E+18 | IsMasterProtein | A0A8C5BVX5 | Centromere protein Q OS=Gadus morhua OX=8049 GN=cenpq PE=3 SV=1                                                                      | 14 | 2 | 2 | 2 | 272  | 29.9  | 9.55  | 4.77 | 2 | 1 |
| 7.82E+18 | IsMasterProtein | A0A8C5C1B4 | Splicing factor 45 OS=Gadus morhua OX=8049 GN=rhm17 PE=4 SV=1                                                                        | 11 | 2 | 2 | 2 | 420  | 46.2  | 6.37  | 5.89 | 2 | 1 |
| 7.86E+18 | IsMasterProtein | A0A8C5C555 | Neurofibromin 2b (merlin) OS=Gadus morhua OX=8049 GN=nf2b PE=4 SV=1                                                                  | 3  | 2 | 2 | 2 | 641  | 74.1  | 7.25  | 4.26 | 2 | 1 |
| 7.86E+18 | IsMasterProtein | A0A8C5BKU2 | Myosin IXA OS=Gadus morhua OX=8049 GN=MYO9A PE=3 SV=1                                                                                | 2  | 2 | 2 | 2 | 1651 | 188.8 | 8.87  | 4.91 | 2 | 1 |
| 7.88E+18 | IsMasterProtein | A0A8C5F5B2 | PAT1 homolog 2 OS=Gadus morhua OX=8049 PE=3 SV=1                                                                                     | 6  | 2 | 2 | 2 | 780  | 87.2  | 7.4   | 5.04 | 2 | 1 |
| 7.92E+18 | IsMasterProtein | A0A8C4ZTI7 | Uncharacterized protein OS=Gadus morhua OX=8049 PE=4 SV=1                                                                            | 8  | 2 | 2 | 2 | 531  | 60.3  | 8.32  | 5.24 | 2 | 1 |
| 7.92E+18 | IsMasterProtein | A0A8C4ZFD7 | Dynein light chain roadblock OS=Gadus morhua OX=8049 PE=3 SV=1                                                                       | 43 | 2 | 2 | 2 | 91   | 10.2  | 10.64 | 6.41 | 2 | 1 |
| 7.93E+18 | IsMasterProtein | A0A8C5B8Y9 | Phosphoinositide phospholipase C OS=Gadus morhua OX=8049 GN=PLCB1 PE=4 SV=1                                                          | 3  | 2 | 2 | 2 | 1142 | 127.8 | 6.6   | 4.87 | 2 | 1 |
| 7.94E+18 | IsMasterProtein | A0A8C5D1E1 | Splicing factor 3b, subunit 2 OS=Gadus morhua OX=8049 GN=sf3b2 PE=4 SV=1                                                             | 5  | 2 | 2 | 2 | 825  | 92.4  | 5.91  | 5.5  | 2 | 1 |
| 7.95E+18 | IsMasterProtein | A0A8C5BVX1 | Uncharacterized protein OS=Gadus morhua OX=8049 PE=4 SV=1                                                                            | 7  | 2 | 2 | 2 | 693  | 75.5  | 7.53  | 5.38 | 2 | 1 |
| 8E+18    | IsMasterProtein | A0A8C5BM70 | Lebercilin domain-containing protein OS=Gadus morhua OX=8049 PE=3 SV=1                                                               | 8  | 2 | 2 | 2 | 585  | 66    | 7.56  | 5.25 | 2 | 1 |
| 8.02E+18 | IsMasterProtein | A0A8C5BQ68 | Kinesin-like protein OS=Gadus morhua OX=8049 GN=KIF23 PE=3 SV=1                                                                      | 6  | 2 | 2 | 2 | 907  | 102.9 | 8.32  | 5.64 | 2 | 1 |
| 8.04E+18 | IsMasterProtein | A0A8C4Z8H4 | BTB (POZ) domain containing 10a OS=Gadus morhua OX=8049 GN=btbd10a PE=4 SV=1                                                         | 10 | 2 | 2 | 2 | 443  | 49.8  | 8.12  | 5.3  | 2 | 1 |
| 8.08E+18 | IsMasterProtein | A0A8C5A2V9 | Transmembrane protein 259 OS=Gadus morhua OX=8049 PE=4 SV=1                                                                          | 4  | 2 | 2 | 2 | 934  | 105.7 | 10.71 | 5.07 | 2 | 1 |
| 8.14E+18 | IsMasterProtein | A0A8C5CXD6 | NACHT domain-containing protein OS=Gadus morhua OX=8049 PE=4 SV=1                                                                    | 12 | 3 | 3 | 2 | 853  | 96.7  | 5.36  | 8.19 | 3 | 1 |
| 8.14E+18 | IsMasterProtein | A0A8C4ZI29 | Cilia and flagella associated protein 70 OS=Gadus morhua OX=8049 GN=cfap70 PE=4 SV=1                                                 | 3  | 2 | 2 | 2 | 1118 | 123.6 | 5.71  | 4.7  | 2 | 1 |
| 8.17E+18 | IsMasterProtein | A0A8C5F6H0 | Uncharacterized protein OS=Gadus morhua OX=8049 PE=4 SV=1                                                                            | 2  | 2 | 3 | 2 | 1954 | 214.2 | 6.09  | 6.02 | 2 | 1 |
| 8.17E+18 | IsMasterProtein | A0A8C5BIQ9 | Uncharacterized protein OS=Gadus morhua OX=8049 PE=4 SV=1                                                                            | 8  | 2 | 2 | 2 | 339  | 36.6  | 7.12  | 4.86 | 2 | 1 |

|          |                 |            |                                                                                                 |    |   |    |   |      |       |      |       |   |   |
|----------|-----------------|------------|-------------------------------------------------------------------------------------------------|----|---|----|---|------|-------|------|-------|---|---|
| 8.17E+18 | IsMasterProtein | A0A8C5AT90 | H15 domain-containing protein OS=Gadus morhua OX=8049 PE=3 SV=1                                 | 16 | 9 | 10 | 2 | 366  | 38.9  | 11.3 | 26.8  | 9 | 1 |
| 8.17E+18 | IsMasterProtein | A0A8C5F3E9 | Dual specificity protein kinase CLK4-like OS=Gadus morhua OX=8049 GN=LOC11552556 PE=3 SV=1      | 7  | 2 | 2  | 2 | 437  | 51.7  | 9.26 | 4.82  | 2 | 1 |
| 8.19E+18 | IsMasterProtein | A0A8C5CND8 | Calcium/calmodulin-dependent protein kinase OS=Gadus morhua OX=8049 GN=camk2b PE=3 SV=1         | 12 | 4 | 4  | 2 | 503  | 57.2  | 7.65 | 10.51 | 4 | 1 |
| 8.2E+18  | IsMasterProtein | A0A8C4Z0S1 | Gse1 coiled-coil protein OS=Gadus morhua OX=8049 GN=gse1 PE=4 SV=1                              | 3  | 2 | 2  | 2 | 1210 | 134.2 | 7.85 | 5.64  | 2 | 1 |
| 8.23E+18 | IsMasterProtein | A0A8C4ZCG5 | REX1, RNA exonuclease 1 homolog OS=Gadus morhua OX=8049 GN=rexo1 PE=4 SV=1                      | 3  | 2 | 2  | 2 | 1292 | 142.7 | 9.01 | 5.27  | 2 | 1 |
| 8.25E+18 | IsMasterProtein | A0A8C5FNG9 | B30.2/SPRY domain-containing protein OS=Gadus morhua OX=8049 PE=4 SV=1                          | 13 | 2 | 2  | 2 | 372  | 41.9  | 4.84 | 5.52  | 2 | 1 |
| 8.25E+18 | IsMasterProtein | A0A8C5A8S6 | Stress-activated protein kinase JNK OS=Gadus morhua OX=8049 GN=mapk10 PE=3 SV=1                 | 10 | 2 | 2  | 2 | 429  | 48.6  | 6.4  | 5.22  | 2 | 1 |
| 8.27E+18 | IsMasterProtein | A0A8C5CZQ3 | Post-GPI attachment to proteins GalNAc transferase 4 OS=Gadus morhua OX=8049 GN=pgap4 PE=4 SV=1 | 13 | 2 | 2  | 2 | 400  | 46    | 9.17 | 5.43  | 2 | 1 |
| 8.29E+18 | IsMasterProtein | A0A8C5B361 | Abhydrolase domain containing 14B OS=Gadus morhua OX=8049 GN=abhd14b PE=4 SV=1                  | 14 | 2 | 2  | 2 | 227  | 24.3  | 8.7  | 5.3   | 2 | 1 |
| 8.34E+18 | IsMasterProtein | A0A8C5AQM7 | Gem (nuclear organelle) associated protein 4 OS=Gadus morhua OX=8049 GN=gemin4 PE=4 SV=1        | 3  | 2 | 2  | 2 | 1152 | 126.7 | 6.29 | 5.73  | 2 | 1 |
| 8.35E+18 | IsMasterProtein | A0A8C5CEW3 | Calcium/calmodulin-dependent serine protein kinase a OS=Gadus morhua OX=8049 PE=3 SV=1          | 10 | 2 | 2  | 2 | 463  | 53    | 6.62 | 5.94  | 2 | 1 |
| 8.36E+18 | IsMasterProtein | A0A8C5FA92 | Neurite extension and migration factor b OS=Gadus morhua OX=8049 PE=4 SV=1                      | 2  | 2 | 2  | 2 | 1466 | 160.5 | 5.85 | 5.05  | 2 | 1 |
| 8.38E+18 | IsMasterProtein | A0A8C5F9A1 | Uncharacterized protein OS=Gadus morhua OX=8049 PE=4 SV=1                                       | 6  | 2 | 2  | 2 | 1038 | 113.8 | 5.21 | 5.84  | 2 | 1 |
| 8.39E+18 | IsMasterProtein | A0A8C5B9A5 | Piezo-type mechanosensitive ion channel component OS=Gadus morhua OX=8049 PE=3 SV=1             | 1  | 2 | 2  | 2 | 2216 | 253.8 | 6.64 | 5.95  | 2 | 1 |
| 8.49E+18 | IsMasterProtein | A0A8C4ZK70 | LIM and SH3 domain protein 1 OS=Gadus morhua OX=8049 PE=4 SV=1                                  | 11 | 2 | 2  | 2 | 236  | 27    | 7.66 | 4.51  | 2 | 1 |
| 8.49E+18 | IsMasterProtein | A0A8C4ZVX7 | rRNA adenine N(6)-methyltransferase OS=Gadus morhua OX=8049 GN=ttf1m PE=3 SV=1                  | 12 | 2 | 2  | 2 | 348  | 38.6  | 9.79 | 6.29  | 2 | 1 |
| 8.54E+18 | IsMasterProtein | A0A8C5ANV1 | MAX dimerization protein 3 OS=Gadus morhua OX=8049 GN=mx3 PE=4 SV=1                             | 22 | 2 | 2  | 2 | 200  | 23.2  | 6.74 | 5.03  | 2 | 1 |
| 8.56E+18 | IsMasterProtein | A0A8C5CXD1 | Zymogen granule membrane protein 16-like OS=Gadus morhua OX=8049 GN=LOC115546163 PE=4 SV=1      | 19 | 2 | 2  | 2 | 171  | 19.4  | 8.68 | 5.3   | 2 | 1 |
| 8.57E+18 | IsMasterProtein | A0A8C5FNP5 | G_PROTEIN_RECEP_F3_4 domain-containing protein OS=Gadus morhua OX=8049 PE=4 SV=1                | 6  | 2 | 2  | 2 | 856  | 95    | 7.5  | 5.64  | 2 | 1 |
| 8.6E+18  | IsMasterProtein | A0A8C5C9Q1 | Glyceronephosphate O-acyltransferase OS=Gadus morhua OX=8049 GN=gnpat PE=3 SV=1                 | 6  | 2 | 2  | 2 | 625  | 70    | 8.32 | 4.85  | 2 | 1 |
| 8.62E+18 | IsMasterProtein | A0A8C5FEJ4 | NLR family, CARD domain containing 3-like OS=Gadus morhua OX=8049 GN=nlrc3l PE=4 SV=1           | 6  | 2 | 2  | 2 | 745  | 85.2  | 5.66 | 5.65  | 2 | 1 |
| 8.64E+18 | IsMasterProtein | A0A8C4ZB04 | Myosin motor domain-containing protein OS=Gadus morhua OX=8049 PE=3 SV=1                        | 5  | 4 | 4  | 2 | 1403 | 161.8 | 5.87 | 10.09 | 4 | 1 |
| 8.66E+18 | IsMasterProtein | A0A8C5BPZ1 | Ig-like domain-containing protein OS=Gadus morhua OX=8049 PE=4 SV=1                             | 32 | 3 | 4  | 2 | 109  | 11.6  | 8.09 | 11.57 | 3 | 1 |
| 8.67E+18 | IsMasterProtein | A0A8C5C433 | SRCR domain-containing protein OS=Gadus morhua OX=8049 PE=4 SV=1                                | 3  | 2 | 2  | 2 | 1008 | 110.7 | 8.88 | 5.05  | 2 | 1 |
| 8.68E+18 | IsMasterProtein | A0A8C5A3C1 | SKI family transcriptional corepressor 1b OS=Gadus morhua OX=8049 GN=skor1b PE=3 SV=1           | 5  | 2 | 3  | 2 | 749  | 83    | 7.25 | 7.18  | 2 | 1 |
| 8.69E+18 | IsMasterProtein | A0A8C4ZIX5 | Src homology 2 domain containing transforming protein D, b OS=Gadus morhua OX=8049 PE=4 SV=1    | 13 | 2 | 2  | 2 | 286  | 32.3  | 5.11 | 5.31  | 2 | 1 |
| 8.69E+18 | IsMasterProtein | A0A8C4ZAM7 | Golgi integral membrane protein 4a OS=Gadus morhua OX=8049 GN=golim4a PE=4 SV=1                 | 5  | 2 | 2  | 2 | 719  | 83.5  | 4.82 | 5.03  | 2 | 1 |
| 8.69E+18 | IsMasterProtein | A0A8C5FL41 | VPS8 subunit of CORVET complex OS=Gadus morhua OX=8049 PE=3 SV=1                                | 5  | 2 | 2  | 2 | 1295 | 145.2 | 6.19 | 6.51  | 2 | 1 |
| 8.72E+18 | IsMasterProtein | A0A8C5BPJ8 | Uncharacterized protein OS=Gadus morhua OX=8049 PE=4 SV=1                                       | 1  | 2 | 2  | 2 | 3725 | 413.7 | 4.91 | 4.77  | 2 | 1 |
| 8.74E+18 | IsMasterProtein | A0A8C5B8U0 | Duodenase-1-like OS=Gadus morhua OX=8049 GN=LOC115556196 PE=4 SV=1                              | 13 | 2 | 4  | 2 | 266  | 29    | 8.85 | 10.65 | 2 | 1 |
| 8.74E+18 | IsMasterProtein | A0A8C5ABZ2 | VLIG-type G domain-containing protein OS=Gadus morhua OX=8049 PE=3 SV=1                         | 4  | 2 | 2  | 2 | 1569 | 179.7 | 6.07 | 5.08  | 2 | 1 |
| 8.74E+18 | IsMasterProtein | A0A8C5CHA9 | ATP-dependent 6-phosphofructokinase OS=Gadus morhua OX=8049 PE=3 SV=1                           | 5  | 2 | 8  | 2 | 784  | 85.8  | 8.16 | 21.91 | 2 | 1 |



|          |                 |            |                                                                                                   |    |   |   |   |      |       |      |       |   |   |
|----------|-----------------|------------|---------------------------------------------------------------------------------------------------|----|---|---|---|------|-------|------|-------|---|---|
| 8.76E+18 | IsMasterProtein | A0A8C5CL12 | Serine--tRNA ligase OS=Gadus morhua OX=8049 GN=sars2 PE=3 SV=1                                    | 8  | 2 | 2 | 2 | 521  | 58.7  | 7.58 | 5.06  | 2 | 1 |
| 8.79E+18 | IsMasterProtein | A0A8C5BAU1 | Calcium channel, voltage-dependent, T type, alpha 1H subunit a OS=Gadus morhua OX=8049 PE=4 SV=1  | 2  | 2 | 2 | 2 | 1447 | 161.3 | 8.72 | 4.8   | 2 | 1 |
| 8.8E+18  | IsMasterProtein | A0A8C5C6N9 | Dolichyl-phosphate-mannose--protein mannosyltransferase OS=Gadus morhua OX=8049 PE=3 SV=1         | 7  | 2 | 3 | 2 | 808  | 90.7  | 7.81 | 5.24  | 2 | 1 |
| 8.87E+18 | IsMasterProtein | A0A8C5AZA3 | Inner centromere protein OS=Gadus morhua OX=8049 GN=incenp PE=3 SV=1                              | 5  | 2 | 2 | 2 | 840  | 95.4  | 9.5  | 6.18  | 2 | 1 |
| 8.89E+18 | IsMasterProtein | A0A8C5ALT4 | Arrestin domain-containing protein 3-like OS=Gadus morhua OX=8049 GN=LOC115545200 PE=3 SV=1       | 6  | 2 | 2 | 2 | 547  | 58.7  | 8.21 | 4.8   | 2 | 1 |
| 8.91E+18 | IsMasterProtein | A0A8C5BGL3 | Enoyl CoA hydratase domain containing 2 OS=Gadus morhua OX=8049 GN=echdc2 PE=3 SV=1               | 10 | 2 | 2 | 2 | 324  | 34.9  | 8.87 | 5.1   | 2 | 1 |
| 8.91E+18 | IsMasterProtein | A0A8C5F4Z8 | Vacuolar protein sorting 13 homolog A OS=Gadus morhua OX=8049 GN=VPS13A PE=3 SV=1                 | 1  | 2 | 2 | 2 | 3191 | 357.9 | 5.64 | 6.39  | 2 | 1 |
| 8.92E+18 | IsMasterProtein | A0A8C5FBJ8 | Uncharacterized protein OS=Gadus morhua OX=8049 PE=4 SV=1                                         | 5  | 2 | 2 | 2 | 749  | 81.7  | 8.6  | 6.17  | 2 | 1 |
| 8.92E+18 | IsMasterProtein | A0A8C5FIN3 | F-box and leucine-rich repeat protein 2 OS=Gadus morhua OX=8049 PE=4 SV=1                         | 10 | 2 | 2 | 2 | 444  | 49.1  | 7.69 | 5.91  | 2 | 1 |
| 8.94E+18 | IsMasterProtein | A0A8C5FC83 | DDHD domain-containing protein OS=Gadus morhua OX=8049 PE=3 SV=1                                  | 7  | 2 | 2 | 2 | 920  | 100.8 | 8.46 | 6.02  | 2 | 1 |
| 8.98E+18 | IsMasterProtein | A0A8C4YYP9 | Uncharacterized protein OS=Gadus morhua OX=8049 PE=3 SV=1                                         | 10 | 2 | 3 | 2 | 319  | 35.7  | 8.29 | 6.56  | 2 | 1 |
| 9.02E+18 | IsMasterProtein | A0A8C4Z9S4 | Adenylate cyclase type 6 OS=Gadus morhua OX=8049 GN=adcy6 PE=3 SV=1                               | 5  | 4 | 4 | 2 | 1137 | 127.6 | 8.15 | 9.47  | 4 | 1 |
| 9.03E+18 | IsMasterProtein | A0A8C5AQ03 | Aldehyde dehydrogenase 6 family, member A1 OS=Gadus morhua OX=8049 GN=ALDH6A1 PE=3 SV=1           | 11 | 4 | 4 | 2 | 562  | 61    | 6.21 | 11.14 | 4 | 1 |
| 9.03E+18 | IsMasterProtein | A0A8C4ZXL8 | Thrombospondin, type 1, domain containing 7Aa OS=Gadus morhua OX=8049 PE=4 SV=1                   | 2  | 2 | 2 | 2 | 1522 | 166.5 | 8.19 | 4.89  | 2 | 1 |
| 9.04E+18 | IsMasterProtein | A0A8C5BYW1 | Reverse transcriptase domain-containing protein OS=Gadus morhua OX=8049 PE=4 SV=1                 | 5  | 2 | 2 | 2 | 723  | 80.8  | 9.33 | 5.79  | 2 | 1 |
| 9.07E+18 | IsMasterProtein | A0A8C4ZJS7 | Hexosyltransferase OS=Gadus morhua OX=8049 GN=chpfa PE=3 SV=1                                     | 7  | 2 | 3 | 2 | 773  | 88.2  | 6.18 | 9.07  | 2 | 1 |
| 9.07E+18 | IsMasterProtein | A0A8C5C325 | MTSS I-BAR domain containing 2b OS=Gadus morhua OX=8049 GN=mtss1lb PE=4 SV=1                      | 4  | 2 | 2 | 2 | 757  | 80.4  | 7.34 | 4.85  | 2 | 1 |
| 9.13E+18 | IsMasterProtein | A0A8C5CSA3 | SAM MT RSMB NOP domain-containing protein OS=Gadus morhua OX=8049 PE=3 SV=1                       | 5  | 2 | 2 | 2 | 488  | 54.1  | 9.17 | 4.21  | 2 | 1 |
| 9.14E+18 | IsMasterProtein | A0A8C5BA11 | Uncharacterized protein OS=Gadus morhua OX=8049 PE=4 SV=1                                         | 4  | 2 | 2 | 2 | 940  | 99.1  | 8.87 | 4.97  | 2 | 1 |
| 9.15E+18 | IsMasterProtein | A0A8C5C6W3 | Uncharacterized protein OS=Gadus morhua OX=8049 PE=4 SV=1                                         | 10 | 2 | 3 | 2 | 452  | 45    | 4.17 | 10.64 | 2 | 1 |
| 9.16E+18 | IsMasterProtein | A0A8C5CNK6 | Non-specific serine/threonine protein kinase OS=Gadus morhua OX=8049 GN=SLK PE=4 SV=1             | 2  | 2 | 2 | 2 | 925  | 107.8 | 5.91 | 4.36  | 2 | 1 |
| 9.18E+18 | IsMasterProtein | A0A8C5BHT6 | Mastermind like transcriptional coactivator 2 OS=Gadus morhua OX=8049 GN=zmp:0000001236 PE=3 SV=1 | 3  | 2 | 2 | 2 | 970  | 101.8 | 9.19 | 4.7   | 2 | 1 |
| 9.21E+18 | IsMasterProtein | A0A8C5C2B5 | Adenosine deaminase RNA specific B2 (inactive) OS=Gadus morhua OX=8049 PE=4 SV=1                  | 5  | 2 | 2 | 2 | 658  | 72.2  | 9.64 | 5.23  | 2 | 1 |

PI: Isoelectric point

Aas: Amino acids

Table S2. Results of the shotgun proteomics analysis of female Atlantic Cod (*Gadus morhua*) proteins

| Proteins<br>Unique<br>Sequence<br>ID | Master          | Accession   | Description                                                                                       | Coverage<br>in<br>Percent | Number<br>of<br>Peptides | Number<br>of<br>PSMs | Number<br>of<br>Unique<br>Peptides | Number<br>of<br>AAs | MW<br>in<br>kDa | calc<br>pI | Score<br>Seque<br>st HT<br>Seque<br>st HT | Number<br>of<br>Peptides<br>by<br>Search<br>Engine<br>Sequences<br>t HT | Number<br>of<br>Protein<br>Groups |
|--------------------------------------|-----------------|-------------|---------------------------------------------------------------------------------------------------|---------------------------|--------------------------|----------------------|------------------------------------|---------------------|-----------------|------------|-------------------------------------------|-------------------------------------------------------------------------|-----------------------------------|
| -<br>6.014E+18                       | IsMasterProtein | A0A8C5AFL5  | Tectorin alpha OS=Gadus morhua OX=8049 PE=4 SV=1                                                  | 50                        | 92                       | 1116                 | 92                                 | 2231                | 246             | 5.39       | 3769.2                                    | 92                                                                      | 1                                 |
| -<br>5.638E+18                       | IsMasterProtein | A0A8C4ZL15  | Uncharacterized protein OS=Gadus morhua OX=8049 PE=4 SV=1                                         | 49                        | 62                       | 458                  | 62                                 | 1450                | 156.2           | 6.83       | 1575.2                                    | 62                                                                      | 1                                 |
| 6.0117E+18                           | IsMasterProtein | A0A8C5CL43  | Otolin 1a OS=Gadus morhua OX=8049 PE=4 SV=1                                                       | 46                        | 32                       | 327                  | 32                                 | 470                 | 48.4            | 8.27       | 1168.4                                    | 32                                                                      | 1                                 |
| -<br>9.157E+17                       | IsMasterProtein | A0A8C5F796  | Otogelin OS=Gadus morhua OX=8049 PE=4 SV=1                                                        | 24                        | 47                       | 213                  | 47                                 | 2599                | 283             | 6.28       | 781.63                                    | 47                                                                      | 1                                 |
| 4.9992E+18                           | IsMasterProtein | A0A8C5FDG2  | Serotransferrin OS=Gadus morhua OX=8049 GN=LOC115548408 PE=3 SV=1                                 | 75                        | 48                       | 177                  | 12                                 | 677                 | 72.2            | 7.31       | 620.19                                    | 48                                                                      | 1                                 |
| 1.6374E+18                           | IsMasterProtein | Q92079      | Serotransferrin (Fragment) OS=Gadus morhua OX=8049 GN=tf PE=2 SV=1                                | 69                        | 42                       | 175                  | 6                                  | 642                 | 67.9            | 6.52       | 612.69                                    | 42                                                                      | 1                                 |
| -<br>1.219E+18                       | IsMasterProtein | A0A8C4Z5E9  | Uncharacterized protein OS=Gadus morhua OX=8049 PE=4 SV=1                                         | 41                        | 48                       | 179                  | 48                                 | 1483                | 162.9           | 6.06       | 605                                       | 48                                                                      | 1                                 |
| -<br>1.222E+17                       | IsMasterProtein | A0A8C4Z1V4  | Uncharacterized protein OS=Gadus morhua OX=8049 PE=3 SV=1                                         | 66                        | 26                       | 163                  | 19                                 | 307                 | 33.4            | 5.44       | 579.19                                    | 26                                                                      | 1                                 |
| -<br>2.485E+18                       | IsMasterProtein | B8XJS7      | Hemoglobin beta 2 OS=Gadus morhua OX=8049 GN=LOC115530778 PE=2 SV=1                               | 82                        | 11                       | 125                  | 4                                  | 147                 | 16.8            | 6.38       | 411.76                                    | 11                                                                      | 1                                 |
| -<br>3.974E+18                       | IsMasterProtein | cRAP_P04264 | Keratin, type II cytoskeletal 1 OS=Homo sapiens GN=KRT1 PE=1 SV=6                                 | 62                        | 36                       | 113                  | 31                                 | 644                 | 66              | 8.12       | 364.57                                    | 36                                                                      | 1                                 |
| -<br>8.56E+18                        | IsMasterProtein | A0A8C5CEI3  | Hemopexin-like OS=Gadus morhua OX=8049 GN=LOC115542094 PE=4 SV=1                                  | 52                        | 18                       | 103                  | 16                                 | 426                 | 47.8            | 6.05       | 355.15                                    | 18                                                                      | 1                                 |
| 7.9898E+18                           | IsMasterProtein | cRAP_P35527 | Keratin, type I cytoskeletal 9 OS=Homo sapiens GN=KRT9 PE=1 SV=3                                  | 64                        | 28                       | 96                   | 28                                 | 623                 | 62              | 5.24       | 350.18                                    | 28                                                                      | 1                                 |
| -<br>4.58E+18                        | IsMasterProtein | A0A8C5D2V1  | SERPIN domain-containing protein OS=Gadus morhua OX=8049 PE=3 SV=1                                | 47                        | 19                       | 97                   | 19                                 | 414                 | 46.6            | 5.08       | 317.37                                    | 19                                                                      | 1                                 |
| -<br>7.862E+18                       | IsMasterProtein | A0A8C5FJ76  | Uncharacterized protein OS=Gadus morhua OX=8049 PE=4 SV=1                                         | 39                        | 50                       | 95                   | 3                                  | 1651                | 181.1           | 8.57       | 298.02                                    | 50                                                                      | 1                                 |
| 1.6745E+18                           | IsMasterProtein | A0A8C4ZDY0  | Hyaluronan and proteoglycan link protein 1-like OS=Gadus morhua OX=8049 GN=LOC115545700 PE=4 SV=1 | 52                        | 15                       | 82                   | 15                                 | 340                 | 37.9            | 5.2        | 280.77                                    | 15                                                                      | 1                                 |
| -<br>4.138E+18                       | IsMasterProtein | cRAP_P00761 | Trypsin OS=Sus scrofa PE=1 SV=1                                                                   | 43                        | 8                        | 70                   | 8                                  | 231                 | 24.4            | 7.18       | 268.64                                    | 8                                                                       | 1                                 |
| -<br>8.776E+18                       | IsMasterProtein | C8YNR1      | Hemoglobin beta 3 OS=Gadus morhua OX=8049 GN=HbB3 PE=3 SV=1                                       | 74                        | 10                       | 79                   | 2                                  | 147                 | 16.6            | 6.67       | 252.31                                    | 10                                                                      | 1                                 |

|                |                     |                 |                                                                                                                  |    |    |    |    |      |           |      |            |    |   |
|----------------|---------------------|-----------------|------------------------------------------------------------------------------------------------------------------|----|----|----|----|------|-----------|------|------------|----|---|
| -<br>4.46E+18  | IsMasterProt<br>ein | C8YNQ4          | Hemoglobin beta 1 OS=Gadus morhua OX=8049 GN=HbB1 PE=3 SV=1                                                      | 90 | 13 | 84 | 4  | 147  | 16.3      | 7.43 | 250.1<br>4 | 13 | 1 |
| -<br>9.188E+17 | IsMasterProt<br>ein | A0A8C5AT8<br>9  | SERPIN domain-containing protein OS=Gadus morhua OX=8049 PE=3 SV=1                                               | 41 | 17 | 75 | 17 | 411  | 45.6      | 5.63 | 239.1<br>6 | 17 | 1 |
| 4.2868E+18     | IsMasterProt<br>ein | B3F9U6          | Hemoglobin beta chain OS=Gadus morhua OX=8049 PE=3 SV=1                                                          | 73 | 9  | 70 | 2  | 147  | 16.7      | 7.02 | 210.9<br>3 | 9  | 1 |
| -<br>2.174E+18 | IsMasterProt<br>ein | A0A8C4ZP37      | Tubulin beta chain OS=Gadus morhua OX=8049 GN=tubb5 PE=3 SV=1                                                    | 62 | 20 | 70 | 6  | 444  | 49.5      | 4.86 | 204.2<br>3 | 20 | 1 |
| -<br>4.155E+18 | IsMasterProt<br>ein | cRAP_P1364<br>5 | Keratin, type I cytoskeletal 10 OS=Homo sapiens GN=KRT10 PE=1 SV=6                                               | 51 | 29 | 58 | 22 | 584  | 58.8      | 5.21 | 197.3<br>2 | 29 | 1 |
| 7.2418E+18     | IsMasterProt<br>ein | A0A8C5B373      | Keratin 8 OS=Gadus morhua OX=8049 PE=3 SV=1                                                                      | 53 | 32 | 69 | 17 | 537  | 56.7      | 5.58 | 195.5<br>8 | 32 | 1 |
| -<br>4.435E+18 | IsMasterProt<br>ein | A0A8C4ZBH<br>5  | Uncharacterized protein OS=Gadus morhua OX=8049 PE=3 SV=1                                                        | 52 | 18 | 53 | 9  | 376  | 41.9      | 5.71 | 188.0<br>5 | 18 | 1 |
| 1.3915E+18     | IsMasterProt<br>ein | A0A8C4YSX<br>2  | Keratin 8 OS=Gadus morhua OX=8049 PE=3 SV=1                                                                      | 44 | 34 | 62 | 25 | 699  | 75.6      | 7.87 | 178.7<br>3 | 34 | 1 |
| -<br>5.235E+18 | IsMasterProt<br>ein | A0A8C4ZVQ<br>3  | Tectorin beta OS=Gadus morhua OX=8049 PE=4 SV=1                                                                  | 43 | 11 | 60 | 11 | 324  | 35.8      | 7.91 | 177.7<br>5 | 11 | 1 |
| -<br>4.657E+18 | IsMasterProt<br>ein | B8XJS4          | Hemoglobin alpha 1 OS=Gadus morhua OX=8049 GN=HbA1 PE=2 SV=1                                                     | 65 | 10 | 59 | 10 | 143  | 15.9      | 9.36 | 168.3<br>3 | 10 | 1 |
| -<br>8.882E+18 | IsMasterProt<br>ein | A0A8C5AI73      | Secreted protein, acidic, cysteine-rich (osteonectin) OS=Gadus morhua OX=8049 GN=sparc PE=3 SV=1                 | 35 | 9  | 47 | 9  | 298  | 33.7      | 4.87 | 165.7<br>4 | 9  | 1 |
| -<br>8.062E+18 | IsMasterProt<br>ein | Q9YHC3          | Tubulin beta-1 chain OS=Gadus morhua OX=8049 PE=2 SV=1                                                           | 50 | 19 | 57 | 3  | 445  | 49.7      | 4.89 | 165.7      | 19 | 1 |
| -<br>6.605E+18 | IsMasterProt<br>ein | cRAP_P3590<br>8 | Keratin, type II cytoskeletal 2 epidermal OS=Homo sapiens GN=KRT2 PE=1 SV=2                                      | 60 | 35 | 56 | 31 | 639  | 65.4      | 8    | 165.0<br>2 | 35 | 1 |
| -<br>4.481E+17 | IsMasterProt<br>ein | A0A8C4ZM9<br>3  | Uncharacterized LOC115542114 OS=Gadus morhua OX=8049 GN=si:ch211-243g18.2 PE=3 SV=1                              | 62 | 26 | 53 | 24 | 426  | 48.5      | 6.16 | 158.8<br>3 | 26 | 1 |
| -<br>5.675E+18 | IsMasterProt<br>ein | P83856          | Kininogen (Fragment) OS=Gadus morhua OX=8049 PE=1 SV=1                                                           | 73 | 8  | 43 | 8  | 123  | 13.4      | 5.07 | 153.2<br>1 | 8  | 1 |
| -<br>3.055E+18 | IsMasterProt<br>ein | A0A8C5AFD<br>9  | Myosin heavy chain, fast skeletal muscle-like OS=Gadus morhua OX=8049 GN=LOC115542558 PE=3 SV=1                  | 18 | 37 | 50 | 2  | 1939 | 221.<br>2 | 5.73 | 151.0<br>7 | 37 | 1 |
| -<br>1.998E+17 | IsMasterProt<br>ein | A0A8C5FBL<br>8  | Uncharacterized protein OS=Gadus morhua OX=8049 PE=4 SV=1                                                        | 29 | 12 | 46 | 8  | 512  | 54.7      | 6.67 | 150.8<br>2 | 12 | 1 |
| 2.0765E+18     | IsMasterProt<br>ein | A0A8C4ZF74      | Decorin OS=Gadus morhua OX=8049 GN=lum PE=3 SV=1                                                                 | 43 | 17 | 46 | 17 | 437  | 48.7      | 9.6  | 150.4<br>8 | 17 | 1 |
| -<br>2.343E+18 | IsMasterProt<br>ein | A0A8C5FSY<br>4  | Myosin motor domain-containing protein OS=Gadus morhua OX=8049 PE=3 SV=1                                         | 17 | 35 | 48 | 2  | 1889 | 216.<br>3 | 5.57 | 145.1<br>3 | 35 | 1 |
| 6.3609E+17     | IsMasterProt<br>ein | A0A8C4ZI26      | Heat shock protein 90, alpha (cytosolic), class A member 1, tandem duplicate 2 OS=Gadus morhua OX=8049 PE=3 SV=1 | 37 | 23 | 42 | 13 | 731  | 83.9      | 5.01 | 138.2<br>3 | 23 | 1 |
| 2.1462E+18     | IsMasterProt<br>ein | A0A8C5AFR<br>1  | Intermediate filament protein ON3-like OS=Gadus morhua OX=8049 GN=si:dkey-222f2.1 PE=3 SV=1                      | 53 | 24 | 45 | 19 | 449  | 50.6      | 5.66 | 134.2<br>5 | 24 | 1 |

|                |                 |            |                                                                                                 |    |    |    |    |      |       |      |        |    |   |
|----------------|-----------------|------------|-------------------------------------------------------------------------------------------------|----|----|----|----|------|-------|------|--------|----|---|
| -<br>7.698E+18 | IsMasterProtein | A0A8C4Z902 | Protein Z-dependent protease inhibitor-like OS=Gadus morhua OX=8049 GN=LOC115534600 PE=3 SV=1   | 37 | 12 | 43 | 12 | 409  | 45.1  | 6.7  | 132.34 | 12 | 1 |
| 7.2602E+18     | IsMasterProtein | A0A8C5C226 | Keratin, type I cytoskeletal 13-like OS=Gadus morhua OX=8049 GN=LOC115534825 PE=4 SV=1          | 59 | 25 | 44 | 16 | 455  | 47.5  | 4.91 | 129.09 | 25 | 1 |
| -<br>8.609E+18 | IsMasterProtein | A0A8C5CHW7 | Vitellogenin-2-like OS=Gadus morhua OX=8049 GN=LOC115556237 PE=4 SV=1                           | 23 | 33 | 44 | 6  | 1644 | 179.2 | 8.97 | 123.62 | 33 | 1 |
| 1.6059E+17     | IsMasterProtein | A0A8C5AZ29 | Tubulin alpha chain OS=Gadus morhua OX=8049 GN=LOC115559022 PE=3 SV=1                           | 39 | 15 | 40 | 4  | 574  | 63.6  | 5.24 | 119.52 | 15 | 1 |
| -<br>4.74E+18  | IsMasterProtein | A0A8C5CL23 | Uncharacterized protein OS=Gadus morhua OX=8049 PE=4 SV=1                                       | 18 | 27 | 39 | 2  | 1635 | 183.4 | 6.18 | 114.2  | 27 | 1 |
| -<br>1.296E+18 | IsMasterProtein | A0A8C5FHR5 | Apolipoprotein A-IV-like OS=Gadus morhua OX=8049 GN=LOC115535852 PE=3 SV=1                      | 73 | 15 | 34 | 15 | 256  | 28.6  | 4.74 | 113.98 | 15 | 1 |
| -<br>1.903E+18 | IsMasterProtein | A0A8C5B311 | Uncharacterized protein OS=Gadus morhua OX=8049 PE=3 SV=1                                       | 14 | 29 | 39 | 2  | 1929 | 220.7 | 5.72 | 113.47 | 29 | 1 |
| -<br>3.187E+18 | IsMasterProtein | A0A8C5ARQ5 | Myosin heavy chain, fast skeletal muscle-like OS=Gadus morhua OX=8049 GN=LOC115542548 PE=3 SV=1 | 14 | 30 | 39 | 3  | 1935 | 221.2 | 5.78 | 111.84 | 30 | 1 |
| -<br>7.273E+17 | IsMasterProtein | A0A8C4Z0D5 | Uncharacterized protein OS=Gadus morhua OX=8049 PE=3 SV=1                                       | 36 | 22 | 37 | 22 | 806  | 90.5  | 7.02 | 109.33 | 22 | 1 |
| -<br>1.137E+18 | IsMasterProtein | A0A8C5BJ41 | Keratin, type II cytoskeletal 8-like OS=Gadus morhua OX=8049 GN=LOC115556866 PE=3 SV=1          | 38 | 20 | 38 | 4  | 460  | 51.7  | 5.08 | 105.93 | 20 | 1 |
| -<br>8.974E+18 | IsMasterProtein | A0A8C4ZH36 | Apolipoprotein Eb OS=Gadus morhua OX=8049 GN=apoeb PE=3 SV=1                                    | 76 | 18 | 31 | 18 | 275  | 30.6  | 4.96 | 104.35 | 18 | 1 |
| 2.4837E+18     | IsMasterProtein | A0A8C5A7M9 | Apolipoprotein A-II OS=Gadus morhua OX=8049 GN=apoa2 PE=4 SV=1                                  | 66 | 7  | 31 | 7  | 141  | 15.4  | 6.65 | 101.27 | 7  | 1 |
| 5.1425E+18     | IsMasterProtein | A0A8C4Z0D0 | Interferon stimulated exonuclease gene 20-like 2 OS=Gadus morhua OX=8049 GN=isg20l2 PE=4 SV=1   | 22 | 24 | 34 | 22 | 1247 | 135.3 | 4.44 | 100.79 | 24 | 1 |
| -<br>8.716E+18 | IsMasterProtein | A0A8C5FEZ3 | Thrombospondin 1b OS=Gadus morhua OX=8049 GN=thbs1b PE=3 SV=1                                   | 27 | 28 | 34 | 28 | 1175 | 130   | 4.98 | 99     | 28 | 1 |
| -<br>9.22E+18  | IsMasterProtein | A0A8C5BRB8 | Tubulin alpha chain OS=Gadus morhua OX=8049 GN=LOC115533160 PE=3 SV=1                           | 41 | 13 | 31 | 2  | 451  | 50.1  | 5.06 | 95.21  | 13 | 1 |
| -<br>8.121E+18 | IsMasterProtein | A0A8C5AMQ1 | Plasminogen OS=Gadus morhua OX=8049 GN=plg PE=3 SV=1                                            | 42 | 25 | 32 | 25 | 791  | 88    | 7.09 | 94.58  | 25 | 1 |
| 1.7508E+18     | IsMasterProtein | A0A8C5BRA4 | Prothrombin OS=Gadus morhua OX=8049 PE=4 SV=1                                                   | 28 | 17 | 31 | 17 | 592  | 66.5  | 6.13 | 91.77  | 17 | 1 |
| -<br>2.061E+17 | IsMasterProtein | A0A8C5A8C5 | Alpha-2-HS-glycoprotein-like OS=Gadus morhua OX=8049 GN=LOC115555905 PE=4 SV=1                  | 47 | 11 | 27 | 11 | 295  | 32.3  | 7.18 | 87.82  | 11 | 1 |
| -<br>7.35E+18  | IsMasterProtein | A0A8C5B8B8 | Tubulin alpha chain OS=Gadus morhua OX=8049 PE=3 SV=1                                           | 30 | 10 | 29 | 2  | 471  | 52.4  | 5.02 | 87.58  | 10 | 1 |
| -<br>8.629E+18 | IsMasterProtein | A0A8C4Z775 | Follistatin-like 1b OS=Gadus morhua OX=8049 PE=4 SV=1                                           | 49 | 20 | 27 | 20 | 310  | 34.5  | 5.01 | 86.83  | 20 | 1 |
| -<br>7.826E+18 | IsMasterProtein | A0A8C4YVZ2 | Carboxylic ester hydrolase OS=Gadus morhua OX=8049 PE=3 SV=1                                    | 31 | 13 | 26 | 13 | 555  | 60.6  | 5.53 | 84.3   | 13 | 1 |

|                 |                 |             |                                                                                                                  |    |    |    |    |      |       |      |       |    |   |
|-----------------|-----------------|-------------|------------------------------------------------------------------------------------------------------------------|----|----|----|----|------|-------|------|-------|----|---|
| -<br>2.761E+18  | IsMasterProtein | A0A8C5BBM7  | Heat shock cognate 70 kDa protein OS=Gadus morhua OX=8049 GN=LOC115546994 PE=3 SV=1                              | 32 | 21 | 29 | 2  | 700  | 77.2  | 5.44 | 82.61 | 21 | 1 |
| -<br>4.396E+18  | IsMasterProtein | A0A8C5FNF2  | C1q domain-containing protein OS=Gadus morhua OX=8049 PE=4 SV=1                                                  | 16 | 6  | 30 | 6  | 476  | 49.5  | 8.88 | 81.73 | 6  | 1 |
| -<br>7.225E+17  | IsMasterProtein | A0A8C4ZA55  | Ceruloplasmin OS=Gadus morhua OX=8049 GN=cp PE=3 SV=1                                                            | 26 | 21 | 27 | 21 | 1068 | 121.1 | 6.84 | 81.49 | 21 | 1 |
| -<br>4.22E+18   | IsMasterProtein | A0A8C5C7H8  | Uncharacterized LOC115545538 OS=Gadus morhua OX=8049 GN=LOC115545538 PE=4 SV=1                                   | 57 | 7  | 25 | 2  | 170  | 18.6  | 7.05 | 80.29 | 7  | 1 |
| -<br>8.849E+18  | IsMasterProtein | A0A8C5B602  | Keratin 94 OS=Gadus morhua OX=8049 PE=3 SV=1                                                                     | 50 | 20 | 27 | 17 | 447  | 49.7  | 5.27 | 79.99 | 20 | 1 |
| -<br>7.318E+18  | IsMasterProtein | A0A8C5A1F7  | Alpha-2-macroglobulin-like OS=Gadus morhua OX=8049 GN=LOC115560909 PE=3 SV=1                                     | 19 | 20 | 26 | 2  | 1324 | 148   | 6.23 | 79.23 | 20 | 1 |
| -<br>4.508E+18  | IsMasterProtein | A0A8C5B3W0  | Uncharacterized protein OS=Gadus morhua OX=8049 PE=3 SV=1                                                        | 23 | 21 | 25 | 5  | 1065 | 117.1 | 6.3  | 78.3  | 21 | 1 |
| -<br>4.413E+18  | IsMasterProtein | B3F9E2      | Hemoglobin alpha chain OS=Gadus morhua OX=8049 PE=3 SV=1                                                         | 52 | 8  | 26 | 8  | 143  | 15.8  | 8.76 | 78.11 | 8  | 1 |
| -<br>1.397E+18  | IsMasterProtein | A0A8C4ZCP9  | Protein S100 OS=Gadus morhua OX=8049 PE=3 SV=1                                                                   | 38 | 4  | 20 | 4  | 93   | 10.4  | 4.64 | 75.02 | 4  | 1 |
| -<br>4.859E+18  | IsMasterProtein | C8YNQ6      | Hemoglobin beta 1 OS=Gadus morhua OX=8049 GN=Hbb1 PE=3 SV=1                                                      | 74 | 11 | 27 | 2  | 147  | 16.4  | 7.8  | 74.94 | 11 | 1 |
| -<br>8.092E+18  | IsMasterProtein | A0A8C5AW E5 | Uncharacterized protein OS=Gadus morhua OX=8049 PE=3 SV=1                                                        | 29 | 19 | 26 | 2  | 646  | 71.6  | 5.45 | 74.84 | 19 | 1 |
| -<br>8.695E+18  | IsMasterProtein | A0A8C5FKJ8  | Heat shock protein 90, alpha (cytosolic), class A member 1, tandem duplicate 2 OS=Gadus morhua OX=8049 PE=3 SV=1 | 24 | 17 | 26 | 9  | 744  | 85.5  | 5.8  | 74.77 | 17 | 1 |
| -<br>5.2051E+18 | IsMasterProtein | A0A8C4ZSL9  | Angiotensinogen OS=Gadus morhua OX=8049 PE=3 SV=1                                                                | 36 | 11 | 21 | 11 | 456  | 50.3  | 5.08 | 74.33 | 11 | 1 |
| -<br>5.354E+18  | IsMasterProtein | A0A8C5B8L9  | Aggrecan core protein-like OS=Gadus morhua OX=8049 GN=LOC115559095 PE=4 SV=1                                     | 12 | 19 | 26 | 19 | 1547 | 161.8 | 4.64 | 73.86 | 19 | 1 |
| -<br>7.145E+18  | IsMasterProtein | A0A8C4Z128  | Glypican-1 OS=Gadus morhua OX=8049 GN=gpc1b PE=3 SV=1                                                            | 49 | 18 | 25 | 18 | 550  | 60.8  | 5.86 | 73.57 | 18 | 1 |
| -<br>3.34E+18   | IsMasterProtein | A0A8C5CNE1  | Tropomyosin 1 (alpha) OS=Gadus morhua OX=8049 GN=TPM1 PE=3 SV=1                                                  | 38 | 19 | 24 | 2  | 354  | 40.8  | 5.43 | 71.89 | 19 | 1 |
| -<br>5.8112E+18 | IsMasterProtein | A0A8C4ZH54  | Keratin 15 OS=Gadus morhua OX=8049 PE=4 SV=1                                                                     | 39 | 18 | 25 | 5  | 442  | 47.5  | 5.03 | 70.88 | 18 | 1 |
| -<br>6.638E+18  | IsMasterProtein | A0A8C5B239  | Uncharacterized protein OS=Gadus morhua OX=8049 PE=3 SV=1                                                        | 17 | 16 | 23 | 2  | 1342 | 148.1 | 5.6  | 70.88 | 16 | 1 |
| -<br>7.541E+18  | IsMasterProtein | A0A8C4Z8U4  | Tubulin beta chain OS=Gadus morhua OX=8049 GN=tubb6 PE=3 SV=1                                                    | 32 | 14 | 25 | 6  | 445  | 49.8  | 4.89 | 68.98 | 14 | 1 |
| -<br>5.9683E+18 | IsMasterProtein | A0A8C4ZJ33  | Collagen, type I, alpha 2 OS=Gadus morhua OX=8049 PE=4 SV=1                                                      | 19 | 17 | 22 | 17 | 1270 | 118.6 | 9.04 | 68.6  | 17 | 1 |
| -<br>7.4947E+18 | IsMasterProtein | A0A8C4ZUH7  | BRICHOS domain-containing protein OS=Gadus morhua OX=8049 PE=3 SV=1                                              | 23 | 4  | 19 | 4  | 320  | 35.6  | 5.14 | 68.4  | 4  | 1 |



|                    |                     |                |                                                                                        |    |    |    |    |      |           |           |       |    |   |
|--------------------|---------------------|----------------|----------------------------------------------------------------------------------------|----|----|----|----|------|-----------|-----------|-------|----|---|
| -<br>7.752E+1<br>8 | IsMasterProt<br>ein | A0A8C5B4W<br>1 | Nucleobindin-1 OS=Gadus morhua OX=8049 GN=nucb1 PE=3 SV=1                              | 44 | 18 | 23 | 18 | 458  | 54.1      | 5.11      | 66.32 | 18 | 1 |
| -<br>8.462E+1<br>8 | IsMasterProt<br>ein | A0A8C5BXS<br>2 | Myosin-7 OS=Gadus morhua OX=8049 GN=LOC115549163 PE=3 SV=1                             | 9  | 18 | 24 | 2  | 1940 | 223.<br>4 | 5.64      | 65.85 | 18 | 1 |
| 3.336E+1<br>8      | IsMasterProt<br>ein | A0A8C4YVX<br>1 | Keratin, type I cytoskeletal 18-like OS=Gadus morhua OX=8049 GN=LOC115539991 PE=3 SV=1 | 45 | 18 | 24 | 17 | 448  | 49.7      | 6.09      | 65.33 | 18 | 1 |
| -<br>7.885E+1<br>8 | IsMasterProt<br>ein | A0A8C5A79<br>7 | Apolipoprotein Bb, tandem duplicate 1 OS=Gadus morhua OX=8049 PE=4 SV=1                | 8  | 21 | 23 | 21 | 3848 | 427.<br>7 | 5.06      | 65.08 | 21 | 1 |
| -<br>6.698E+1<br>8 | IsMasterProt<br>ein | A0A8C5F4N<br>2 | Phosphopyruvate hydratase OS=Gadus morhua OX=8049 GN=eno1a PE=3 SV=1                   | 45 | 15 | 22 | 9  | 432  | 46.9      | 5.95      | 65.05 | 15 | 1 |
| 5.6635E+<br>18     | IsMasterProt<br>ein | A0A8C5AXS<br>8 | Uncharacterized protein OS=Gadus morhua OX=8049 PE=3 SV=1                              | 49 | 15 | 23 | 6  | 377  | 41.8      | 5.71      | 65.01 | 15 | 1 |
| 2.9645E+<br>18     | IsMasterProt<br>ein | A0A8C5CSQ<br>7 | Fetuin B OS=Gadus morhua OX=8049 GN=fetub PE=4 SV=1                                    | 16 | 6  | 19 | 6  | 488  | 53.1      | 6.61      | 64.62 | 6  | 1 |
| 9.664E+1<br>6      | IsMasterProt<br>ein | A0A8C5CSX<br>4 | Neurocan b OS=Gadus morhua OX=8049 PE=4 SV=1                                           | 16 | 19 | 22 | 19 | 1604 | 174.<br>3 | 5.64      | 63.91 | 19 | 1 |
| -<br>1.919E+1<br>8 | IsMasterProt<br>ein | A0A8C5AW<br>R7 | Glutathione S-transferase OS=Gadus morhua OX=8049 PE=3 SV=1                            | 50 | 11 | 25 | 10 | 210  | 23.6      | 8.88      | 63.74 | 11 | 1 |
| 2.3329E+<br>18     | IsMasterProt<br>ein | A0A8C4ZPP<br>5 | Uncharacterized protein OS=Gadus morhua OX=8049 PE=3 SV=1                              | 15 | 17 | 22 | 2  | 1388 | 152.<br>7 | 6.23      | 63.67 | 17 | 1 |
| 2.7537E+<br>18     | IsMasterProt<br>ein | A0A8C5CKE<br>2 | Keratin, type I cytoskeletal 13-like OS=Gadus morhua OX=8049 GN=LOC115534825 PE=4 SV=1 | 40 | 13 | 21 | 3  | 420  | 45.8      | 5.33      | 61.45 | 13 | 1 |
| -<br>8.112E+1<br>8 | IsMasterProt<br>ein | A0A8C5B042     | Histone H4 OS=Gadus morhua OX=8049 PE=3 SV=1                                           | 58 | 10 | 21 | 10 | 96   | 10.9      | 11.1<br>8 | 61.23 | 10 | 1 |
| 4.4558E+<br>18     | IsMasterProt<br>ein | A0A8C5C7T<br>6 | Prosaposin OS=Gadus morhua OX=8049 GN=psap PE=4 SV=1                                   | 31 | 12 | 20 | 12 | 531  | 58.2      | 4.89      | 60.5  | 12 | 1 |
| -<br>2.573E+1<br>8 | IsMasterProt<br>ein | Q56TU0         | Type-4 ice-structuring protein OS=Gadus morhua OX=8049 PE=2 SV=1                       | 68 | 6  | 18 | 6  | 125  | 14        | 4.7       | 60.37 | 6  | 1 |
| -<br>2.934E+1<br>8 | IsMasterProt<br>ein | A0A8C5F5J6     | Eosinophil peroxidase-like OS=Gadus morhua OX=8049 GN=LOC115542730 PE=4 SV=1           | 31 | 18 | 20 | 11 | 785  | 87.9      | 8.54      | 59.61 | 18 | 1 |
| 2.1474E+<br>18     | IsMasterProt<br>ein | A0A8C4YZ6<br>0 | ATP synthase subunit beta OS=Gadus morhua OX=8049 GN=LOC115533330 PE=3 SV=1            | 34 | 15 | 20 | 15 | 519  | 55.7      | 5.19      | 59.14 | 15 | 1 |
| -<br>5.98E+18      | IsMasterProt<br>ein | A0A8C5AKB<br>1 | Carboxypeptidase E OS=Gadus morhua OX=8049 GN=cpe PE=3 SV=1                            | 38 | 15 | 20 | 15 | 456  | 51.5      | 4.98      | 58.22 | 15 | 1 |
| -<br>7.833E+1<br>8 | IsMasterProt<br>ein | A0A8C5FBY<br>0 | Protein disulfide-isomerase OS=Gadus morhua OX=8049 GN=pdia3 PE=3 SV=1                 | 42 | 16 | 20 | 16 | 499  | 55.2      | 5.43      | 57.28 | 16 | 1 |
| -<br>3.158E+1<br>8 | IsMasterProt<br>ein | A0A8C4ZHY<br>1 | Chondroadherin-like b OS=Gadus morhua OX=8049 GN=chadlb PE=3 SV=1                      | 27 | 16 | 18 | 16 | 773  | 85.6      | 8.62      | 56.82 | 16 | 1 |
| -<br>7.495E+1<br>8 | IsMasterProt<br>ein | A0A8C5BI23     | Spectrin alpha, non-erythrocytic 1 OS=Gadus morhua OX=8049 GN=SPTAN1 PE=3 SV=1         | 10 | 18 | 19 | 18 | 2481 | 284.<br>9 | 5.21      | 56.34 | 18 | 1 |
| 2.9161E+<br>17     | IsMasterProt<br>ein | A0A8C4YW<br>D2 | Fibrinogen gamma chain OS=Gadus morhua OX=8049 GN=fgg PE=4 SV=1                        | 42 | 13 | 18 | 8  | 425  | 48.2      | 5.19      | 56.03 | 13 | 1 |
| -<br>8.999E+1<br>8 | IsMasterProt<br>ein | A0A8C5CAG<br>6 | Prominin 1 b OS=Gadus morhua OX=8049 PE=3 SV=1                                         | 16 | 13 | 20 | 13 | 867  | 95.8      | 5.85      | 55.93 | 13 | 1 |

|                |                 |             |                                                                                                   |    |    |    |    |      |       |      |       |    |   |
|----------------|-----------------|-------------|---------------------------------------------------------------------------------------------------|----|----|----|----|------|-------|------|-------|----|---|
| -<br>5.581E+18 | IsMasterProtein | A0A8C4ZM89  | Triosephosphate isomerase OS=Gadus morhua OX=8049 PE=3 SV=1                                       | 54 | 12 | 18 | 12 | 258  | 27.9  | 7.77 | 55.06 | 12 | 1 |
| 1.2717E+18     | IsMasterProtein | A0A8C5B7J2  | Multiple inositol polyphosphate phosphatase 1 OS=Gadus morhua OX=8049 GN=LOC115559836 PE=3 SV=1   | 30 | 12 | 19 | 12 | 464  | 52.7  | 8.07 | 54.78 | 12 | 1 |
| -<br>8.596E+18 | IsMasterProtein | A0A8C5D0X0  | Uncharacterized protein OS=Gadus morhua OX=8049 PE=3 SV=1                                         | 9  | 16 | 20 | 2  | 1938 | 223.3 | 5.8  | 53.87 | 16 | 1 |
| 8.1272E+18     | IsMasterProtein | A0A8C4YTJ7  | Fibronectin OS=Gadus morhua OX=8049 GN=fn1b PE=4 SV=1                                             | 10 | 19 | 19 | 3  | 2362 | 258.7 | 5.95 | 53.75 | 19 | 1 |
| -<br>3.707E+17 | IsMasterProtein | A0A8C5FET4  | Filamin B OS=Gadus morhua OX=8049 GN=FLNB PE=3 SV=1                                               | 8  | 16 | 19 | 16 | 2621 | 278.6 | 6.01 | 53.72 | 16 | 1 |
| 6.8271E+18     | IsMasterProtein | A0A8C5AXJ8  | Tropomyosin alpha-1 chain-like OS=Gadus morhua OX=8049 GN=LOC115558702 PE=3 SV=1                  | 48 | 15 | 19 | 2  | 250  | 28.8  | 4.97 | 53.7  | 15 | 1 |
| -<br>5.556E+18 | IsMasterProtein | A0A8C5BI77  | Myosin-7-like OS=Gadus morhua OX=8049 GN=LOC115537505 PE=3 SV=1                                   | 8  | 17 | 20 | 3  | 1938 | 223.2 | 5.74 | 53.4  | 17 | 1 |
| -<br>8.415E+18 | IsMasterProtein | A0A8C5B0S5  | Protein disulfide-isomerase OS=Gadus morhua OX=8049 PE=3 SV=1                                     | 32 | 14 | 18 | 14 | 500  | 56    | 4.74 | 52.92 | 14 | 1 |
| 5.642E+18      | IsMasterProtein | A0A8C4ZBJ9  | Anaphylatoxin-like domain-containing protein OS=Gadus morhua OX=8049 PE=4 SV=1                    | 13 | 14 | 18 | 5  | 1469 | 163.8 | 6.9  | 52.45 | 14 | 1 |
| -<br>5.957E+18 | IsMasterProtein | A0A8C4ZHL1  | Serpin peptidase inhibitor, clade G (C1 inhibitor), member 1 OS=Gadus morhua OX=8049 PE=3 SV=1    | 23 | 8  | 16 | 8  | 480  | 52.7  | 6.58 | 52.27 | 8  | 1 |
| -<br>2.622E+18 | IsMasterProtein | A0A8C4Z237  | Transitional endoplasmic reticulum ATPase OS=Gadus morhua OX=8049 GN=vcp PE=3 SV=1                | 23 | 16 | 19 | 16 | 791  | 88    | 5.39 | 52.25 | 16 | 1 |
| -<br>8.019E+18 | IsMasterProtein | A0A8C4ZEH5  | Transketolase b OS=Gadus morhua OX=8049 PE=4 SV=1                                                 | 28 | 15 | 19 | 15 | 625  | 68    | 6.96 | 51.33 | 15 | 1 |
| -<br>3.941E+18 | IsMasterProtein | A0A8C5CUN9  | Tropomyosin 4a OS=Gadus morhua OX=8049 GN=TPM4 PE=3 SV=1                                          | 38 | 12 | 17 | 3  | 253  | 29.1  | 5.01 | 50.99 | 12 | 1 |
| 4.6353E+18     | IsMasterProtein | A0A8C4ZB43  | Matrilin 4 OS=Gadus morhua OX=8049 PE=4 SV=1                                                      | 30 | 14 | 18 | 14 | 656  | 72    | 5.48 | 50.34 | 14 | 1 |
| -<br>3.374E+18 | IsMasterProtein | A0A8C5AZT6  | Myosin, heavy chain 9b, non-muscle OS=Gadus morhua OX=8049 GN=myh9b PE=3 SV=1                     | 10 | 17 | 18 | 12 | 1954 | 226.3 | 5.6  | 48.44 | 17 | 1 |
| -<br>3.418E+18 | IsMasterProtein | A0A8C5AGK0  | ATP synthase subunit alpha OS=Gadus morhua OX=8049 GN=atp5fa1 PE=3 SV=1                           | 24 | 12 | 16 | 12 | 551  | 59.7  | 8.9  | 47.85 | 12 | 1 |
| -<br>2.74E+18  | IsMasterProtein | A0A8C5CWG9  | Uncharacterized protein OS=Gadus morhua OX=8049 PE=3 SV=1                                         | 19 | 13 | 16 | 9  | 890  | 102.2 | 5.19 | 47.82 | 13 | 1 |
| -<br>1.651E+18 | IsMasterProtein | A0A8C4ZAY7  | Fibrinogen beta chain OS=Gadus morhua OX=8049 GN=fgb PE=4 SV=1                                    | 30 | 12 | 16 | 12 | 484  | 54    | 6.96 | 47.39 | 12 | 1 |
| -<br>7.851E+18 | IsMasterProtein | A0A8C5CLM6  | Protein disulfide-isomerase OS=Gadus morhua OX=8049 GN=pdia4 PE=3 SV=1                            | 20 | 13 | 16 | 13 | 657  | 73.1  | 5.03 | 47.3  | 13 | 1 |
| -<br>3.98E+18  | IsMasterProtein | cRAP_P62979 | Ubiquitin-40S ribosomal protein S27a OS=Homo sapiens GN=RPS27A PE=1 SV=2                          | 15 | 4  | 16 | 4  | 156  | 18    | 9.64 | 47.12 | 4  | 1 |
| 3.0278E+18     | IsMasterProtein | A0A8C4Z4K1  | Sodium/potassium-transporting ATPase subunit alpha OS=Gadus morhua OX=8049 GN=atp1a1a.1 PE=3 SV=1 | 15 | 12 | 15 | 8  | 1026 | 112.9 | 5.55 | 47.04 | 12 | 1 |

|                |                 |            |                                                                                                 |    |    |    |    |      |       |       |       |    |   |
|----------------|-----------------|------------|-------------------------------------------------------------------------------------------------|----|----|----|----|------|-------|-------|-------|----|---|
| -<br>4.653E+18 | IsMasterProtein | A0A8C5AIQ0 | Desmoplakin OS=Gadus morhua OX=8049 GN=dsp PE=4 SV=1                                            | 10 | 18 | 18 | 4  | 2409 | 276.9 | 6.79  | 46.77 | 18 | 1 |
| -<br>5.954E+18 | IsMasterProtein | A0A8C5BX34 | Tropomyosin alpha-1 chain-like OS=Gadus morhua OX=8049 GN=LOC115548938 PE=3 SV=1                | 38 | 12 | 16 | 3  | 247  | 28.4  | 4.68  | 46.7  | 12 | 1 |
| -<br>4.355E+18 | IsMasterProtein | A0A8C5FF90 | Clathrin heavy chain OS=Gadus morhua OX=8049 PE=3 SV=1                                          | 11 | 14 | 15 | 2  | 1675 | 191.1 | 5.52  | 46.61 | 14 | 1 |
| -<br>8.911E+18 | IsMasterProtein | A0A8C5FK28 | Nucleolin OS=Gadus morhua OX=8049 PE=4 SV=1                                                     | 33 | 14 | 17 | 14 | 464  | 49.7  | 5.05  | 46.51 | 14 | 1 |
| 3.6541E+17     | IsMasterProtein | A0A8C4Z9U2 | Uncharacterized protein OS=Gadus morhua OX=8049 PE=4 SV=1                                       | 10 | 11 | 15 | 3  | 1579 | 175.1 | 5.99  | 45.13 | 11 | 1 |
| -<br>2.475E+18 | IsMasterProtein | A0A8C5F3P5 | Metalloproteinase inhibitor 2 OS=Gadus morhua OX=8049 GN=timp2a PE=3 SV=1                       | 46 | 7  | 11 | 7  | 220  | 24.5  | 6.33  | 44.92 | 7  | 1 |
| -<br>5.812E+18 | IsMasterProtein | A0A8C5F8B1 | Adaptor related protein complex 3 subunit delta 1 OS=Gadus morhua OX=8049 PE=3 SV=1             | 16 | 13 | 16 | 13 | 1089 | 122.6 | 8.03  | 44.61 | 13 | 1 |
| 7.7096E+18     | IsMasterProtein | A0A8C5B3U9 | Tropomyosin alpha-1 chain-like OS=Gadus morhua OX=8049 GN=LOC115548938 PE=3 SV=1                | 20 | 12 | 16 | 2  | 545  | 60.6  | 5.44  | 44.55 | 12 | 1 |
| -<br>3.582E+18 | IsMasterProtein | A0A8C5CDS1 | Uncharacterized protein OS=Gadus morhua OX=8049 PE=3 SV=1                                       | 8  | 15 | 17 | 4  | 1935 | 221.3 | 5.94  | 43.96 | 15 | 1 |
| -<br>7.885E+18 | IsMasterProtein | A0A8C5BSR3 | Calmodulin 2a (phosphorylase kinase, delta) OS=Gadus morhua OX=8049 GN=calm1b PE=4 SV=1         | 23 | 6  | 14 | 6  | 180  | 20    | 4.34  | 43.77 | 6  | 1 |
| 6.5509E+18     | IsMasterProtein | A0A8C4ZT40 | H15 domain-containing protein OS=Gadus morhua OX=8049 PE=3 SV=1                                 | 25 | 8  | 14 | 7  | 315  | 33.2  | 10.83 | 43.03 | 8  | 1 |
| -<br>8.636E+18 | IsMasterProtein | A0A8C5BBZ7 | 78 kDa glucose-regulated protein OS=Gadus morhua OX=8049 GN=hspa5 PE=3 SV=1                     | 25 | 13 | 15 | 10 | 656  | 72.4  | 5.07  | 42.9  | 13 | 1 |
| 3.3396E+18     | IsMasterProtein | A0A8C5AKI2 | Sodium/potassium-transporting ATPase subunit beta OS=Gadus morhua OX=8049 GN=atp1b1b PE=3 SV=1  | 37 | 11 | 13 | 11 | 300  | 34.5  | 6.79  | 42.57 | 11 | 1 |
| -<br>4.336E+18 | IsMasterProtein | A0A8C5BC92 | Uncharacterized protein OS=Gadus morhua OX=8049 PE=4 SV=1                                       | 8  | 16 | 17 | 16 | 6897 | 733   | 5.6   | 42.56 | 16 | 1 |
| -<br>8.509E+18 | IsMasterProtein | A0A8C5C047 | Collagen, type I, alpha 1b OS=Gadus morhua OX=8049 GN=coll1a1b PE=4 SV=1                        | 14 | 11 | 15 | 5  | 1399 | 132.2 | 6.02  | 42.11 | 11 | 1 |
| 8.7557E+17     | IsMasterProtein | A0A8C4ZTB9 | Myosin, heavy chain 6, cardiac muscle, alpha OS=Gadus morhua OX=8049 PE=3 SV=1                  | 6  | 12 | 15 | 3  | 1953 | 224.9 | 5.85  | 41.81 | 12 | 1 |
| -<br>3.646E+18 | IsMasterProtein | A0A8C5BST5 | Collagen, type VI, alpha 3 OS=Gadus morhua OX=8049 GN=COL6A3 PE=4 SV=1                          | 9  | 16 | 16 | 7  | 3089 | 331.6 | 6.64  | 41.52 | 16 | 1 |
| 2.1298E+18     | IsMasterProtein | A0A8C5BJ24 | Desmoplakin OS=Gadus morhua OX=8049 GN=dsp PE=4 SV=1                                            | 9  | 16 | 16 | 2  | 2303 | 260.7 | 6.83  | 41.33 | 16 | 1 |
| -<br>8.492E+18 | IsMasterProtein | A0A8C5ASM5 | Sodium/potassium-transporting ATPase subunit alpha OS=Gadus morhua OX=8049 GN=atp1a3b PE=3 SV=1 | 14 | 10 | 13 | 6  | 989  | 108.9 | 5.47  | 41.32 | 10 | 1 |
| 9.4602E+17     | IsMasterProtein | A0A8C5F697 | TGF_BETA_2 domain-containing protein OS=Gadus morhua OX=8049 PE=3 SV=1                          | 17 | 6  | 12 | 6  | 419  | 45.8  | 9.55  | 41.3  | 6  | 1 |
| -<br>5.411E+18 | IsMasterProtein | A0A8C4YVK4 | Secreted phosphoprotein 24 OS=Gadus morhua OX=8049 PE=3 SV=1                                    | 41 | 6  | 14 | 6  | 140  | 15.4  | 8.48  | 40.69 | 6  | 1 |

|                |                 |            |                                                                                        |    |    |    |    |      |       |      |       |    |   |
|----------------|-----------------|------------|----------------------------------------------------------------------------------------|----|----|----|----|------|-------|------|-------|----|---|
| 1.0153E+18     | IsMasterProtein | A0A8C5BVB7 | Pentraxin 3, long a OS=Gadus morhua OX=8049 GN=PTX3 PE=4 SV=1                          | 25 | 9  | 13 | 9  | 490  | 51.5  | 5.82 | 40.27 | 9  | 1 |
| -<br>3.432E+18 | IsMasterProtein | A0A8C5F6L1 | Fructose-bisphosphate aldolase OS=Gadus morhua OX=8049 PE=3 SV=1                       | 30 | 13 | 14 | 11 | 367  | 40.1  | 8.13 | 40.17 | 13 | 1 |
| -<br>3.624E+18 | IsMasterProtein | A0A8C5CV28 | Ig-like domain-containing protein OS=Gadus morhua OX=8049 PE=3 SV=1                    | 21 | 9  | 14 | 4  | 456  | 52.6  | 7.49 | 39.96 | 9  | 1 |
| -<br>2.411E+18 | IsMasterProtein | A0A8C5F7T9 | Keratin, type I cytoskeletal 13-like OS=Gadus morhua OX=8049 GN=LOC115540539 PE=4 SV=1 | 29 | 12 | 14 | 10 | 417  | 47.1  | 5.31 | 39.73 | 12 | 1 |
| -<br>8.47E+18  | IsMasterProtein | A0A8C5A766 | Plectin a OS=Gadus morhua OX=8049 GN=pleca PE=4 SV=1                                   | 3  | 11 | 18 | 9  | 4695 | 533   | 6.77 | 39.46 | 11 | 1 |
| -<br>7.131E+18 | IsMasterProtein | A0A8C5FUP4 | Lymphocyte cytosolic protein 1 (L-plastin) OS=Gadus morhua OX=8049 PE=4 SV=1           | 20 | 9  | 13 | 7  | 621  | 69.6  | 5.48 | 39.28 | 9  | 1 |
| 5.5025E+18     | IsMasterProtein | A0A8C4ZLA0 | 60S acidic ribosomal protein P2 OS=Gadus morhua OX=8049 GN=rplp2 PE=3 SV=1             | 79 | 6  | 13 | 6  | 117  | 11.6  | 4.5  | 39.19 | 6  | 1 |
| -<br>4.434E+18 | IsMasterProtein | A0A8C4ZQT0 | Clusterin OS=Gadus morhua OX=8049 GN=clu PE=3 SV=1                                     | 25 | 11 | 15 | 11 | 478  | 54    | 5.25 | 39.03 | 11 | 1 |
| -<br>5.798E+18 | IsMasterProtein | A0A8C4YZF8 | Low density lipoprotein receptor-related protein 2a OS=Gadus morhua OX=8049 PE=3 SV=1  | 4  | 15 | 15 | 15 | 4619 | 510.3 | 5.1  | 38.94 | 15 | 1 |
| -<br>1.292E+18 | IsMasterProtein | A0A8C5CYC2 | T-complex protein 1 subunit alpha OS=Gadus morhua OX=8049 GN=TCP1 PE=3 SV=1            | 13 | 4  | 14 | 4  | 546  | 59.4  | 8.21 | 38.75 | 4  | 1 |
| -<br>7.959E+18 | IsMasterProtein | A0A8C5A9I9 | Uncharacterized protein OS=Gadus morhua OX=8049 PE=4 SV=1                              | 28 | 13 | 14 | 6  | 547  | 60.9  | 5.41 | 38.61 | 13 | 1 |
| -<br>4.24E+18  | IsMasterProtein | A0A8C5B3V0 | Uncharacterized LOC115545538 OS=Gadus morhua OX=8049 GN=LOC115545538 PE=4 SV=1         | 64 | 7  | 13 | 2  | 152  | 16.7  | 7.58 | 38.55 | 7  | 1 |
| -<br>7.528E+18 | IsMasterProtein | A0A8C5FTZ2 | High mobility group box 1 OS=Gadus morhua OX=8049 PE=3 SV=1                            | 32 | 10 | 13 | 9  | 242  | 27.6  | 6.93 | 38.54 | 10 | 1 |
| -<br>1.441E+18 | IsMasterProtein | A0A8C5AMF5 | Uncharacterized protein OS=Gadus morhua OX=8049 PE=4 SV=1                              | 8  | 6  | 12 | 2  | 1123 | 124.6 | 6.42 | 38.44 | 6  | 1 |
| 5.9431E+18     | IsMasterProtein | B9TU22     | Lysozyme g OS=Gadus morhua OX=8049 PE=1 SV=1                                           | 51 | 8  | 13 | 4  | 217  | 24.1  | 8.81 | 38.31 | 8  | 1 |
| -<br>3.451E+17 | IsMasterProtein | A0A8C4ZKE4 | Tropomyosin alpha-3 chain-like OS=Gadus morhua OX=8049 GN=LOC115554335 PE=3 SV=1       | 33 | 10 | 12 | 7  | 248  | 28.8  | 4.83 | 38.12 | 10 | 1 |
| -<br>8.907E+18 | IsMasterProtein | A0A8C5C777 | Endoplasmin-like OS=Gadus morhua OX=8049 GN=LOC115550943 PE=3 SV=1                     | 15 | 12 | 14 | 8  | 813  | 93.5  | 5.14 | 37.74 | 12 | 1 |
| 2.7346E+18     | IsMasterProtein | A0A8C4ZMZ6 | Alpha-carbonic anhydrase domain-containing protein OS=Gadus morhua OX=8049 PE=3 SV=1   | 24 | 4  | 13 | 4  | 247  | 27.3  | 8.02 | 37.61 | 4  | 1 |
| -<br>5.276E+18 | IsMasterProtein | A0A8C5CDL5 | Complement factor B-like OS=Gadus morhua OX=8049 GN=LOC115546677 PE=4 SV=1             | 15 | 10 | 13 | 10 | 722  | 81.6  | 5.78 | 36.93 | 10 | 1 |
| 6.9102E+18     | IsMasterProtein | A0A8C4ZRP9 | Biliverdin reductase B OS=Gadus morhua OX=8049 GN=blvrb PE=4 SV=1                      | 22 | 3  | 11 | 3  | 209  | 22.5  | 8.02 | 36.69 | 3  | 1 |
| -<br>2.631E+18 | IsMasterProtein | A0A8C5FNC4 | Solute carrier family 38 member 10 OS=Gadus morhua OX=8049 GN=slc38a10 PE=4 SV=1       | 2  | 2  | 15 | 2  | 1022 | 110   | 5.97 | 36.53 | 2  | 1 |

|                |                     |            |                                                                                                 |    |    |    |    |      |       |       |       |    |   |
|----------------|---------------------|------------|-------------------------------------------------------------------------------------------------|----|----|----|----|------|-------|-------|-------|----|---|
| -<br>6.752E+18 | IsMasterProt<br>ein | A0A8C5CX30 | Uncharacterized protein OS=Gadus morhua OX=8049 PE=4 SV=1                                       | 8  | 5  | 12 | 2  | 877  | 98    | 6.71  | 36    | 5  | 1 |
| 4.2487E+18     | IsMasterProt<br>ein | A0A8C5F684 | Lipocalin-like OS=Gadus morhua OX=8049 GN=LOC115537335 PE=3 SV=1                                | 28 | 3  | 10 | 3  | 183  | 19.9  | 5.76  | 35.97 | 3  | 1 |
| 4.0359E+18     | IsMasterProt<br>ein | A0A8C5D2A7 | L-lactate dehydrogenase OS=Gadus morhua OX=8049 GN=LOC115541542 PE=3 SV=1                       | 16 | 6  | 12 | 4  | 451  | 49.2  | 9.17  | 35.84 | 6  | 1 |
| 9.1812E+18     | IsMasterProt<br>ein | A0A8C5CQP6 | Eukaryotic translation elongation factor 2 OS=Gadus morhua OX=8049 GN=eef2 PE=3 SV=1            | 15 | 11 | 13 | 11 | 858  | 95.6  | 6.77  | 35.26 | 11 | 1 |
| -<br>9.057E+18 | IsMasterProt<br>ein | A0A8C5CLI6 | Uncharacterized protein OS=Gadus morhua OX=8049 PE=4 SV=1                                       | 7  | 6  | 12 | 3  | 1100 | 123.4 | 6.3   | 35.06 | 6  | 1 |
| -<br>6.926E+18 | IsMasterProt<br>ein | A0A8C4ZXB0 | Legumain OS=Gadus morhua OX=8049 PE=3 SV=1                                                      | 19 | 7  | 10 | 7  | 413  | 45.8  | 5.83  | 34.55 | 7  | 1 |
| 5.4835E+17     | IsMasterProt<br>ein | A0A8C5BH78 | Cytidine deaminase OS=Gadus morhua OX=8049 GN=cdab PE=3 SV=1                                    | 51 | 5  | 9  | 5  | 164  | 17.9  | 6.01  | 34.5  | 5  | 1 |
| 7.4687E+18     | IsMasterProt<br>ein | A0A8C4ZC59 | Glutamine synthetase OS=Gadus morhua OX=8049 GN=LOC115549024 PE=3 SV=1                          | 28 | 8  | 12 | 8  | 386  | 43.3  | 6.05  | 34.36 | 8  | 1 |
| -<br>3.121E+18 | IsMasterProt<br>ein | A0A8C4Z328 | 14-3-3 protein beta/alpha-1-like OS=Gadus morhua OX=8049 GN=LOC115553599 PE=3 SV=1              | 41 | 10 | 12 | 7  | 244  | 27.7  | 4.73  | 34.35 | 10 | 1 |
| -<br>4.574E+18 | IsMasterProt<br>ein | A0A8C5ANI1 | Eosinophil peroxidase-like OS=Gadus morhua OX=8049 GN=LOC115542730 PE=4 SV=1                    | 19 | 11 | 12 | 4  | 785  | 88.2  | 7.09  | 34.19 | 11 | 1 |
| -<br>7.326E+18 | IsMasterProt<br>ein | A0A8C5B761 | Uncharacterized protein OS=Gadus morhua OX=8049 PE=4 SV=1                                       | 18 | 8  | 12 | 8  | 613  | 67.3  | 5.34  | 34.07 | 8  | 1 |
| 1.5957E+17     | IsMasterProt<br>ein | A0A8C4ZFJ9 | Keratin, type I cytoskeletal 13-like OS=Gadus morhua OX=8049 GN=LOC115534848 PE=4 SV=1          | 24 | 10 | 12 | 5  | 438  | 47.4  | 4.98  | 33.97 | 10 | 1 |
| -<br>5.647E+17 | IsMasterProt<br>ein | A0A8C5ATU8 | Vascular cell adhesion protein 1-like OS=Gadus morhua OX=8049 GN=LOC115529122 PE=4 SV=1         | 15 | 10 | 11 | 10 | 875  | 96.4  | 6.89  | 32.8  | 10 | 1 |
| 7.5999E+18     | IsMasterProt<br>ein | A0A8C4Z2N5 | MANSC domain containing 4 OS=Gadus morhua OX=8049 GN=manse4 PE=4 SV=1                           | 8  | 4  | 10 | 4  | 476  | 51.8  | 8.79  | 32.72 | 4  | 1 |
| -<br>1.477E+18 | IsMasterProt<br>ein | A0A8C5BI74 | 60S ribosomal protein L7a OS=Gadus morhua OX=8049 GN=rp17a PE=3 SV=1                            | 31 | 7  | 11 | 7  | 266  | 29.9  | 10.56 | 32.71 | 7  | 1 |
| -<br>8.398E+18 | IsMasterProt<br>ein | A0A8C4ZKC1 | FAM20C golgi associated secretory pathway kinase a OS=Gadus morhua OX=8049 GN=fam20ca PE=3 SV=1 | 16 | 9  | 12 | 6  | 583  | 66.9  | 8.63  | 32.51 | 9  | 1 |
| -<br>1.605E+18 | IsMasterProt<br>ein | A0A8C4Z117 | Prominin 2 OS=Gadus morhua OX=8049 GN=prom2 PE=3 SV=1                                           | 9  | 7  | 11 | 7  | 827  | 90.2  | 5.55  | 32.46 | 7  | 1 |
| -<br>4.599E+18 | IsMasterProt<br>ein | A0A8C5FMY9 | Acetoacetyl-CoA synthetase OS=Gadus morhua OX=8049 GN=si:dkey-215k6.1 PE=3 SV=1                 | 16 | 11 | 12 | 11 | 1163 | 123.7 | 5.95  | 32.34 | 11 | 1 |
| 4.7725E+18     | IsMasterProt<br>ein | A0A8C4Z087 | Parvalbumin OS=Gadus morhua OX=8049 PE=3 SV=1                                                   | 42 | 10 | 12 | 6  | 212  | 22.3  | 4.75  | 31.7  | 10 | 1 |
| -<br>2.527E+18 | IsMasterProt<br>ein | A0A8C4ZN43 | Phosphatidylinositol-3,4-bisphosphate 4-phosphatase OS=Gadus morhua OX=8049 GN=inpp4b PE=3 SV=1 | 5  | 2  | 10 | 2  | 875  | 98.3  | 6.81  | 31.7  | 2  | 1 |
| 5.89E+18       | IsMasterProt<br>ein | A0A8C5B5B7 | Uncharacterized protein OS=Gadus morhua OX=8049 PE=4 SV=1                                       | 18 | 12 | 12 | 3  | 1555 | 169.5 | 8.15  | 31.63 | 12 | 1 |
| -<br>9.08E+18  | IsMasterProt<br>ein | A0A8C5BXG9 | Coagulation factor XIII A chain-like OS=Gadus morhua OX=8049 GN=LOC115537605 PE=3 SV=1          | 16 | 8  | 10 | 8  | 731  | 80.4  | 5.16  | 31.6  | 8  | 1 |



|            |                 |            |                                                                                                                                         |    |    |    |    |      |       |      |       |    |   |
|------------|-----------------|------------|-----------------------------------------------------------------------------------------------------------------------------------------|----|----|----|----|------|-------|------|-------|----|---|
| 3.2649E+17 | IsMasterProtein | A0A8C4ZA42 | Myosin heavy chain, fast skeletal muscle-like OS=Gadus morhua OX=8049 GN=LOC115533170 PE=3 SV=1                                         | 7  | 11 | 13 | 2  | 1954 | 224.8 | 5.73 | 31.56 | 11 | 1 |
| 4.827E+18  | IsMasterProtein | A0A8C4ZFY4 | Thrombospondin 4a OS=Gadus morhua OX=8049 GN=thbs4a PE=3 SV=1                                                                           | 14 | 10 | 11 | 9  | 952  | 103.8 | 4.53 | 31.15 | 10 | 1 |
| 7.4455E+18 | IsMasterProtein | A0A8C5BIM3 | Uncharacterized protein OS=Gadus morhua OX=8049 PE=4 SV=1                                                                               | 20 | 10 | 11 | 3  | 521  | 57.9  | 5.68 | 30.98 | 10 | 1 |
| 6.736E+18  | IsMasterProtein | A0A8C4ZDU6 | Tyrosine 3-monooxygenase/tryptophan 5-monooxygenase activation protein, theta polypeptide b OS=Gadus morhua OX=8049 GN=ywhaqb PE=3 SV=1 | 34 | 8  | 11 | 6  | 250  | 28.2  | 4.65 | 30.93 | 8  | 1 |
| 5.346E+18  | IsMasterProtein | A0A8C5B6G1 | Dachsous cadherin-related 1b OS=Gadus morhua OX=8049 PE=4 SV=1                                                                          | 5  | 11 | 11 | 11 | 3114 | 334.9 | 4.91 | 30.92 | 11 | 1 |
| 7.323E+18  | IsMasterProtein | A0A8C5A6A5 | Complement component C9 OS=Gadus morhua OX=8049 GN=LOC115531106 PE=3 SV=1                                                               | 19 | 7  | 10 | 7  | 583  | 64.1  | 7.25 | 30.77 | 7  | 1 |
| 6.692E+18  | IsMasterProtein | A0A8C5A144 | Fructose-bisphosphate aldolase OS=Gadus morhua OX=8049 PE=3 SV=1                                                                        | 30 | 9  | 10 | 6  | 353  | 38.5  | 7.87 | 30.69 | 9  | 1 |
| 4.43E+18   | IsMasterProtein | A0A8C5BV46 | Uncharacterized protein OS=Gadus morhua OX=8049 PE=3 SV=1                                                                               | 15 | 7  | 10 | 7  | 628  | 70.8  | 9.14 | 30.38 | 7  | 1 |
| 7.987E+18  | IsMasterProtein | A0A8C5C6U5 | Syndecan binding protein (syntenin) 2 OS=Gadus morhua OX=8049 GN=sdcbp2 PE=4 SV=1                                                       | 24 | 6  | 10 | 6  | 301  | 32.6  | 7.87 | 30.15 | 6  | 1 |
| 5.925E+18  | IsMasterProtein | A0A8C4Z7S3 | AP-3 complex subunit mu-2 OS=Gadus morhua OX=8049 GN=ap3m2 PE=3 SV=1                                                                    | 32 | 10 | 11 | 10 | 418  | 46.9  | 7.53 | 30.13 | 10 | 1 |
| 1.745E+18  | IsMasterProtein | A0A8C4ZTE5 | High mobility group-T protein-like OS=Gadus morhua OX=8049 GN=LOC115561521 PE=3 SV=1                                                    | 26 | 6  | 9  | 6  | 174  | 20.4  | 9.89 | 30.1  | 6  | 1 |
| 3.674E+18  | IsMasterProtein | A0A8C4YZH3 | Ezrin b OS=Gadus morhua OX=8049 PE=4 SV=1                                                                                               | 17 | 12 | 12 | 12 | 572  | 67.6  | 6.38 | 29.89 | 12 | 1 |
| 6.092E+18  | IsMasterProtein | A0A8C4ZRK0 | Uncharacterized protein OS=Gadus morhua OX=8049 PE=4 SV=1                                                                               | 7  | 10 | 11 | 10 | 1680 | 190.5 | 5.9  | 29.88 | 10 | 1 |
| 5.365E+18  | IsMasterProtein | A0A8C5BSU4 | Transforming growth factor-beta-induced protein ig-h3 OS=Gadus morhua OX=8049 GN=tgfb1 PE=4 SV=1                                        | 14 | 8  | 10 | 8  | 682  | 75.1  | 7.47 | 29.81 | 8  | 1 |
| 9.669E+17  | IsMasterProtein | A0A8C5BAL6 | Uncharacterized protein OS=Gadus morhua OX=8049 PE=3 SV=1                                                                               | 9  | 9  | 11 | 9  | 1039 | 109.7 | 4.89 | 29.7  | 9  | 1 |
| 2.457E+18  | IsMasterProtein | A0A8C5BQI6 | SERPIN domain-containing protein OS=Gadus morhua OX=8049 PE=3 SV=1                                                                      | 15 | 7  | 10 | 7  | 455  | 50    | 5.81 | 29.46 | 7  | 1 |
| 8.853E+18  | IsMasterProtein | A0A8C4YZP8 | Malate dehydrogenase OS=Gadus morhua OX=8049 GN=MDH1 PE=3 SV=1                                                                          | 32 | 10 | 11 | 10 | 324  | 35.1  | 7.06 | 29.46 | 10 | 1 |
| 3.9608E+18 | IsMasterProtein | A0A8C4Z6C0 | Vitronectin b OS=Gadus morhua OX=8049 GN=vtmb PE=4 SV=1                                                                                 | 23 | 9  | 11 | 9  | 455  | 50.8  | 7.75 | 29.4  | 9  | 1 |
| 4.2298E+18 | IsMasterProtein | A0A8C4ZJD3 | 40S ribosomal protein S6 OS=Gadus morhua OX=8049 PE=3 SV=1                                                                              | 14 | 9  | 11 | 9  | 756  | 85    | 9.82 | 28.79 | 9  | 1 |
| 8.741E+18  | IsMasterProtein | A0A8C5A3A6 | Uncharacterized protein OS=Gadus morhua OX=8049 PE=3 SV=1                                                                               | 24 | 8  | 9  | 8  | 393  | 43.4  | 5.11 | 28.19 | 8  | 1 |
| 9.2106E+18 | IsMasterProtein | A0A8C4Z2M4 | Tetraspanin OS=Gadus morhua OX=8049 GN=cd81a PE=3 SV=1                                                                                  | 27 | 8  | 10 | 8  | 238  | 26.3  | 6.18 | 28.11 | 8  | 1 |

|                |                  |            |                                                                                                     |    |   |    |   |      |       |      |       |   |   |
|----------------|------------------|------------|-----------------------------------------------------------------------------------------------------|----|---|----|---|------|-------|------|-------|---|---|
| 8.1538E+17     | IsMasterProt ein | A0A8C5BUI6 | Type I cytokeratin, enveloping layer OS=Gadus morhua OX=8049 PE=4 SV=1                              | 19 | 9 | 10 | 5 | 465  | 50.7  | 6.07 | 27.88 | 9 | 1 |
| -<br>7.017E+18 | IsMasterProt ein | A0A8C5BWD7 | Apolipoprotein A-Ia OS=Gadus morhua OX=8049 GN=apoa1a PE=3 SV=1                                     | 34 | 7 | 10 | 7 | 245  | 27.7  | 5.12 | 27.67 | 7 | 1 |
| 5.0602E+18     | IsMasterProt ein | A0A8C5B065 | HERV-H LTR-associating 1 OS=Gadus morhua OX=8049 GN=HHLA1 PE=4 SV=1                                 | 10 | 6 | 9  | 6 | 558  | 59.4  | 8.37 | 27.65 | 6 | 1 |
| -<br>3.454E+18 | IsMasterProt ein | A0A8C5BGC5 | Stabilin 1 OS=Gadus morhua OX=8049 GN=stab1 PE=4 SV=1                                               | 2  | 2 | 12 | 2 | 1949 | 211.2 | 7.11 | 27.52 | 2 | 1 |
| -<br>7.814E+18 | IsMasterProt ein | A0A8C5APY2 | Zona pellucida sperm-binding protein 4-like OS=Gadus morhua OX=8049 GN=LOC115551343 PE=3 SV=1       | 17 | 7 | 8  | 7 | 542  | 59.1  | 7.39 | 27.36 | 7 | 1 |
| -<br>7.882E+18 | IsMasterProt ein | A0A8C4ZWL8 | Uncharacterized protein OS=Gadus morhua OX=8049 PE=3 SV=1                                           | 9  | 6 | 10 | 2 | 1035 | 111.6 | 4.83 | 27.16 | 6 | 1 |
| 1.6854E+18     | IsMasterProt ein | A0A8C4ZJD9 | Peroxiredoxin-5 OS=Gadus morhua OX=8049 GN=prdx5 PE=3 SV=1                                          | 45 | 5 | 8  | 5 | 190  | 20    | 8.34 | 27.11 | 5 | 1 |
| -<br>4.406E+18 | IsMasterProt ein | A0A8C5CIM6 | Leucyl aminopeptidase family protein OS=Gadus morhua OX=8049 GN=zgc:152830 PE=3 SV=1                | 16 | 6 | 8  | 6 | 534  | 58.3  | 6.93 | 27.07 | 6 | 1 |
| -<br>9.033E+18 | IsMasterProt ein | A0A8C5AZQ3 | Uncharacterized protein OS=Gadus morhua OX=8049 PE=4 SV=1                                           | 11 | 3 | 9  | 2 | 341  | 38    | 5.39 | 27.01 | 3 | 1 |
| -<br>4.914E+18 | IsMasterProt ein | A0A8C5AD36 | Contactin 1a OS=Gadus morhua OX=8049 GN=CNTN1 PE=4 SV=1                                             | 14 | 9 | 9  | 9 | 1001 | 110.6 | 6.19 | 26.93 | 9 | 1 |
| -<br>1.112E+18 | IsMasterProt ein | A0A8C5BZK3 | Phosphopyruvate hydratase OS=Gadus morhua OX=8049 GN=eno3 PE=3 SV=1                                 | 24 | 9 | 10 | 4 | 399  | 43.4  | 5.74 | 26.84 | 9 | 1 |
| 3.3222E+18     | IsMasterProt ein | A0A8C5C9L1 | Uncharacterized protein OS=Gadus morhua OX=8049 PE=4 SV=1                                           | 15 | 8 | 10 | 8 | 533  | 59.9  | 8.16 | 26.74 | 8 | 1 |
| 5.5601E+18     | IsMasterProt ein | A0A8C5F686 | Calreticulin OS=Gadus morhua OX=8049 PE=3 SV=1                                                      | 27 | 9 | 9  | 9 | 426  | 49    | 4.45 | 26.54 | 9 | 1 |
| 1.3684E+18     | IsMasterProt ein | A0A8C4YUX9 | Nascent polypeptide associated complex subunit alpha OS=Gadus morhua OX=8049 GN=naca PE=4 SV=1      | 27 | 4 | 8  | 4 | 215  | 23.5  | 4.56 | 26.31 | 4 | 1 |
| -<br>7.588E+18 | IsMasterProt ein | A0A8C5A2J8 | RNA helicase OS=Gadus morhua OX=8049 GN=eif4a1a PE=3 SV=1                                           | 26 | 7 | 9  | 7 | 406  | 46.1  | 5.33 | 26.11 | 7 | 1 |
| -<br>2.818E+18 | IsMasterProt ein | A0A8C5BFU7 | Fatty acid binding protein 7, brain, a OS=Gadus morhua OX=8049 GN=fabp7a PE=3 SV=1                  | 43 | 5 | 8  | 5 | 132  | 14.9  | 5.2  | 26.09 | 5 | 1 |
| -<br>4.186E+18 | IsMasterProt ein | A0A8C4Z8Y0 | Beta-2-glycoprotein 1 OS=Gadus morhua OX=8049 GN=LOC115540415 PE=4 SV=1                             | 26 | 6 | 8  | 6 | 363  | 39.4  | 7.78 | 26.08 | 6 | 1 |
| -<br>1.782E+18 | IsMasterProt ein | A0A8C5CMJ8 | Vinculin OS=Gadus morhua OX=8049 GN=VCL PE=3 SV=1                                                   | 10 | 8 | 9  | 8 | 1096 | 119.8 | 6.2  | 26.07 | 8 | 1 |
| -<br>6.287E+18 | IsMasterProt ein | A0A8C5B0W9 | Gelsolin OS=Gadus morhua OX=8049 GN=scinlb PE=4 SV=1                                                | 12 | 9 | 9  | 9 | 733  | 80.6  | 7.46 | 26.05 | 9 | 1 |
| 1.0765E+18     | IsMasterProt ein | A0A8C5FEX0 | EGF containing fibulin extracellular matrix protein 2a OS=Gadus morhua OX=8049 GN=efemp2a PE=4 SV=1 | 22 | 7 | 8  | 7 | 436  | 48.7  | 4.86 | 25.85 | 7 | 1 |
| -<br>4.05E+18  | IsMasterProt ein | A0A8C4ZYU4 | Chitinase OS=Gadus morhua OX=8049 GN=LOC115546646 PE=3 SV=1                                         | 18 | 5 | 8  | 2 | 481  | 52.8  | 6.67 | 25.74 | 5 | 1 |
| 5.5821E+17     | IsMasterProt ein | A0A8C4YTR7 | Keratin 15 OS=Gadus morhua OX=8049 PE=4 SV=1                                                        | 17 | 8 | 9  | 2 | 359  | 40.4  | 4.98 | 25.56 | 8 | 1 |

|                |                 |             |                                                                                                             |    |   |    |   |      |       |       |       |   |   |
|----------------|-----------------|-------------|-------------------------------------------------------------------------------------------------------------|----|---|----|---|------|-------|-------|-------|---|---|
| -<br>1.909E+18 | IsMasterProtein | A0A8C5C2K6  | Uncharacterized protein OS=Gadus morhua OX=8049 PE=4 SV=1                                                   | 4  | 5 | 9  | 2 | 1537 | 173.1 | 6.57  | 25.46 | 5 | 1 |
| -<br>3.584E+18 | IsMasterProtein | A0A8C5AQP5  | Uncharacterized protein OS=Gadus morhua OX=8049 PE=4 SV=1                                                   | 14 | 7 | 9  | 7 | 617  | 67.9  | 6.99  | 25.28 | 7 | 1 |
| 1.9829E+18     | IsMasterProtein | A0A8C4Z1Y0  | Histone H2A OS=Gadus morhua OX=8049 PE=3 SV=1                                                               | 37 | 4 | 8  | 3 | 126  | 13.5  | 10.87 | 25.27 | 4 | 1 |
| 2.4244E+18     | IsMasterProtein | A0A8C4YVN8  | Uncharacterized protein OS=Gadus morhua OX=8049 PE=4 SV=1                                                   | 6  | 6 | 8  | 3 | 1261 | 124.7 | 7.96  | 25.14 | 6 | 1 |
| -<br>5.826E+18 | IsMasterProtein | A0A8C5CU97  | H(+)-transporting two-sector ATPase OS=Gadus morhua OX=8049 GN=LOC115547679 PE=3 SV=1                       | 12 | 7 | 9  | 7 | 618  | 68.4  | 5.44  | 25.04 | 7 | 1 |
| 3.5408E+17     | IsMasterProtein | A0A8C5FKW8  | Uncharacterized protein OS=Gadus morhua OX=8049 PE=4 SV=1                                                   | 22 | 7 | 8  | 7 | 371  | 42.4  | 7.9   | 25.04 | 7 | 1 |
| -<br>6.156E+18 | IsMasterProtein | A0A8C5BRQ2  | Annexin OS=Gadus morhua OX=8049 PE=3 SV=1                                                                   | 21 | 6 | 9  | 6 | 319  | 34.9  | 4.51  | 24.96 | 6 | 1 |
| 3.3558E+18     | IsMasterProtein | A0A8C5A8G4  | Membrane metallo-endopeptidase-like 1 OS=Gadus morhua OX=8049 GN=mmel1 PE=4 SV=1                            | 15 | 9 | 9  | 9 | 769  | 88.1  | 5.47  | 24.93 | 9 | 1 |
| -<br>2.023E+18 | IsMasterProtein | cRAP_O77727 | Keratin, type I cytoskeletal 15 OS=Ovis aries GN=KRT15 PE=2 SV=1                                            | 17 | 8 | 9  | 2 | 453  | 48.7  | 4.79  | 24.79 | 8 | 1 |
| 1.3271E+18     | IsMasterProtein | A0A8C4YWG5  | Acyl-CoA synthetase family member 3 OS=Gadus morhua OX=8049 GN=ACSF3 PE=3 SV=1                              | 21 | 4 | 9  | 4 | 575  | 63.2  | 7.52  | 24.58 | 4 | 1 |
| -<br>6.361E+18 | IsMasterProtein | A0A8C4ZFE7  | Serpin peptidase inhibitor, clade D (heparin cofactor), member 1 OS=Gadus morhua OX=8049 PE=3 SV=1          | 12 | 7 | 9  | 7 | 507  | 57.7  | 6.2   | 24.58 | 7 | 1 |
| -<br>6.868E+18 | IsMasterProtein | A0A8C4ZQW9  | High mobility group box 2a OS=Gadus morhua OX=8049 GN=hmbg2a PE=4 SV=1                                      | 34 | 8 | 9  | 7 | 213  | 24    | 8.4   | 24.48 | 8 | 1 |
| -<br>8.836E+18 | IsMasterProtein | A0A8C5FRQ7  | Glyceraldehyde-3-phosphate dehydrogenase OS=Gadus morhua OX=8049 PE=3 SV=1                                  | 20 | 5 | 8  | 4 | 340  | 36.7  | 8.56  | 24.43 | 5 | 1 |
| 8.5883E+18     | IsMasterProtein | A0A8C5CS13  | Nucleoside diphosphate kinase B OS=Gadus morhua OX=8049 GN=LOC115534945 PE=3 SV=1                           | 42 | 5 | 10 | 5 | 149  | 16.9  | 7.3   | 24.3  | 5 | 1 |
| 8.9346E+17     | IsMasterProtein | A0A8C5BJ01  | Aspartate aminotransferase OS=Gadus morhua OX=8049 GN=got2b PE=3 SV=1                                       | 30 | 9 | 9  | 9 | 401  | 44.1  | 8.35  | 24.23 | 9 | 1 |
| 1.3872E+18     | IsMasterProtein | A0A8C5C4G3  | Glutamate dehydrogenase (NAD(P)(+)) OS=Gadus morhua OX=8049 GN=glud1b PE=3 SV=1                             | 17 | 7 | 9  | 3 | 542  | 59.6  | 7.94  | 24.1  | 7 | 1 |
| -<br>8.712E+18 | IsMasterProtein | A0A8C5FD89  | Alpha-1,4 glucan phosphorylase OS=Gadus morhua OX=8049 GN=pygm PE=3 SV=1                                    | 13 | 9 | 9  | 5 | 755  | 87.2  | 6.98  | 23.94 | 9 | 1 |
| -<br>5.143E+18 | IsMasterProtein | A0A8C4YVJ7  | Serpin peptidase inhibitor, clade C (antithrombin), member 1 OS=Gadus morhua OX=8049 GN=serpincl1 PE=3 SV=1 | 25 | 9 | 9  | 9 | 449  | 50.9  | 5.38  | 23.91 | 9 | 1 |
| -<br>6.695E+18 | IsMasterProtein | A0A8C4Z9R4  | Creatine kinase OS=Gadus morhua OX=8049 GN=CKM PE=3 SV=1                                                    | 18 | 7 | 8  | 6 | 380  | 42.7  | 6.93  | 23.75 | 7 | 1 |
| -<br>4.237E+18 | IsMasterProtein | A0A8C5FJ67  | HATPase_c domain-containing protein OS=Gadus morhua OX=8049 PE=3 SV=1                                       | 10 | 7 | 8  | 3 | 810  | 93.6  | 4.91  | 23.31 | 7 | 1 |
| 5.4908E+17     | IsMasterProtein | A8CZB9      | Carbonyl reductase (NADPH) OS=Gadus morhua OX=8049 GN=cbr1 PE=2 SV=1                                        | 19 | 5 | 7  | 5 | 275  | 30    | 7.84  | 23.19 | 5 | 1 |
| -<br>8.169E+18 | IsMasterProtein | A0A8C5FKQ4  | Dedicator of cytokinesis 1 OS=Gadus morhua OX=8049 GN=dock1 PE=3 SV=1                                       | 3  | 3 | 8  | 3 | 1627 | 188.7 | 6.7   | 23.07 | 3 | 1 |

|            |                 |            |                                                                                                                                        |    |   |    |   |      |       |       |       |   |   |
|------------|-----------------|------------|----------------------------------------------------------------------------------------------------------------------------------------|----|---|----|---|------|-------|-------|-------|---|---|
| 8.6364E+18 | IsMasterProtein | A0A8C4ZB04 | Myosin motor domain-containing protein OS=Gadus morhua OX=8049 PE=3 SV=1                                                               | 8  | 8 | 8  | 2 | 1403 | 161.8 | 5.87  | 23    | 8 | 1 |
| -9.107E+18 | IsMasterProtein | A0A8C5AV29 | Keratin 15 OS=Gadus morhua OX=8049 PE=4 SV=1                                                                                           | 23 | 7 | 8  | 2 | 293  | 32.4  | 4.86  | 22.81 | 7 | 1 |
| -9.058E+18 | IsMasterProtein | A0A8C5B226 | 40S_SA_C domain-containing protein OS=Gadus morhua OX=8049 PE=3 SV=1                                                                   | 23 | 4 | 6  | 4 | 283  | 31.2  | 5.16  | 22.72 | 4 | 1 |
| 1.7209E+18 | IsMasterProtein | A0A8C5AIV9 | Insulin-like growth factor 2 receptor OS=Gadus morhua OX=8049 GN=igf2r PE=4 SV=1                                                       | 5  | 9 | 9  | 9 | 2284 | 249   | 5.92  | 22.64 | 9 | 1 |
| -2.446E+18 | IsMasterProtein | A0A8C5B8Y4 | Glyceraldehyde-3-phosphate dehydrogenase OS=Gadus morhua OX=8049 GN=gapdhs PE=3 SV=1                                                   | 23 | 6 | 8  | 5 | 313  | 33.3  | 5.95  | 22.58 | 6 | 1 |
| -3.382E+17 | IsMasterProtein | A0A8C5A5H1 | Spectrin repeat containing, nuclear envelope 1b OS=Gadus morhua OX=8049 PE=3 SV=1                                                      | 1  | 5 | 8  | 5 | 8206 | 932.9 | 5.45  | 22.52 | 5 | 1 |
| -3.205E+18 | IsMasterProtein | A0A8C5F488 | Adhesion G protein-coupled receptor G6 OS=Gadus morhua OX=8049 PE=3 SV=1                                                               | 8  | 7 | 8  | 7 | 1165 | 127.9 | 7.46  | 22.19 | 7 | 1 |
| -7.286E+18 | IsMasterProtein | A0A8C4Z566 | Plectin b OS=Gadus morhua OX=8049 PE=4 SV=1                                                                                            | 2  | 9 | 10 | 8 | 4650 | 531.2 | 6.58  | 22.07 | 9 | 1 |
| -9.092E+18 | IsMasterProtein | A0A8C5AQ56 | Tyrosine 3-monooxygenase/tryptophan 5-monooxygenase activation protein, beta polypeptide a OS=Gadus morhua OX=8049 GN=ywhaba PE=3 SV=1 | 29 | 6 | 8  | 3 | 237  | 26.9  | 5.14  | 22.04 | 6 | 1 |
| -9.161E+18 | IsMasterProtein | A0A8C4ZR55 | Purine-rich element binding protein Ab OS=Gadus morhua OX=8049 GN=purab PE=3 SV=1                                                      | 38 | 7 | 8  | 4 | 281  | 31.3  | 6.95  | 22.02 | 7 | 1 |
| -4.358E+17 | IsMasterProtein | A0A8C5FCW0 | Ig-like domain-containing protein OS=Gadus morhua OX=8049 PE=3 SV=1                                                                    | 18 | 5 | 7  | 2 | 369  | 41.6  | 6.06  | 22    | 5 | 1 |
| -5.943E+18 | IsMasterProtein | A0A8C5FD85 | Mediator of RNA polymerase II transcription subunit 24 OS=Gadus morhua OX=8049 PE=3 SV=1                                               | 4  | 2 | 9  | 2 | 986  | 110.6 | 7.31  | 21.89 | 2 | 1 |
| 3.6786E+18 | IsMasterProtein | A0A8C5BD06 | SERPIN domain-containing protein OS=Gadus morhua OX=8049 PE=3 SV=1                                                                     | 28 | 7 | 7  | 7 | 349  | 38.7  | 8.9   | 21.79 | 7 | 1 |
| -8.828E+18 | IsMasterProtein | A0A8C5AID1 | Aminopeptidase OS=Gadus morhua OX=8049 GN=anpepb PE=3 SV=1                                                                             | 8  | 6 | 8  | 5 | 966  | 108.1 | 5.73  | 21.5  | 6 | 1 |
| 5.641E+18  | IsMasterProtein | A0A8C4ZED9 | Zona pellucida sperm-binding protein 3 OS=Gadus morhua OX=8049 GN=LOC115551355 PE=3 SV=1                                               | 15 | 6 | 8  | 6 | 421  | 46.2  | 5.58  | 21.35 | 6 | 1 |
| -1.237E+18 | IsMasterProtein | A0A8C4ZNP4 | Serine protease inhibitor 2.1-like OS=Gadus morhua OX=8049 GN=LOC115553729 PE=3 SV=1                                                   | 25 | 6 | 8  | 6 | 418  | 46.5  | 5.74  | 21.33 | 6 | 1 |
| 5.9429E+18 | IsMasterProtein | A0A8C4ZJE1 | 14-3-3 protein beta/alpha-like OS=Gadus morhua OX=8049 GN=LOC115534522 PE=3 SV=1                                                       | 22 | 5 | 8  | 3 | 254  | 28.6  | 4.73  | 21.32 | 5 | 1 |
| -6.419E+18 | IsMasterProtein | A0A8C5FH89 | Glucose-6-phosphate isomerase OS=Gadus morhua OX=8049 PE=3 SV=1                                                                        | 13 | 5 | 7  | 5 | 563  | 62.8  | 6.67  | 21.31 | 5 | 1 |
| 1.0619E+18 | IsMasterProtein | A0A8C5BAZ7 | Uncharacterized protein OS=Gadus morhua OX=8049 PE=4 SV=1                                                                              | 18 | 3 | 7  | 3 | 489  | 50.2  | 11.99 | 21.23 | 3 | 1 |
| -7.408E+18 | IsMasterProtein | A0A8C4ZF97 | Tumor susceptibility 101a OS=Gadus morhua OX=8049 GN=tsg101a PE=3 SV=1                                                                 | 17 | 7 | 8  | 7 | 390  | 43.9  | 6.28  | 21.11 | 7 | 1 |
| -7.873E+17 | IsMasterProtein | A0A8C5B988 | Growth arrest-specific 6 OS=Gadus morhua OX=8049 PE=4 SV=1                                                                             | 10 | 5 | 7  | 5 | 649  | 72.2  | 6.3   | 20.96 | 5 | 1 |

|            |                 |            |                                                                                                              |    |   |   |   |      |       |      |       |   |   |
|------------|-----------------|------------|--------------------------------------------------------------------------------------------------------------|----|---|---|---|------|-------|------|-------|---|---|
| 5.074E+18  | IsMasterProtein | A0A8C5FKN0 | Dystonin OS=Gadus morhua OX=8049 GN=DST PE=4 SV=1                                                            | 2  | 9 | 9 | 9 | 7632 | 851.4 | 4.92 | 20.95 | 9 | 1 |
| 6.2858E+17 | IsMasterProtein | A0A8C4ZNJ6 | Ribosomal protein, large, P0 OS=Gadus morhua OX=8049 GN=rlp0 PE=3 SV=1                                       | 35 | 7 | 7 | 7 | 256  | 28.2  | 9.16 | 20.89 | 7 | 1 |
| 2.2158E+18 | IsMasterProtein | A0A8C5A632 | BRICHOS domain containing 5 OS=Gadus morhua OX=8049 GN=bricd5 PE=4 SV=1                                      | 21 | 3 | 6 | 3 | 233  | 25.7  | 5.71 | 20.7  | 3 | 1 |
| -3.534E+18 | IsMasterProtein | A0A8C5C8H7 | 14-3-3 protein epsilon-like OS=Gadus morhua OX=8049 GN=LOC115546836 PE=3 SV=1                                | 25 | 6 | 8 | 3 | 256  | 28.9  | 4.78 | 20.66 | 6 | 1 |
| -8.418E+18 | IsMasterProtein | A0A8C5D288 | AP-3 complex subunit beta OS=Gadus morhua OX=8049 GN=ap3b2 PE=3 SV=1                                         | 9  | 8 | 8 | 8 | 953  | 106.4 | 5.77 | 20.5  | 8 | 1 |
| -1.957E+18 | IsMasterProtein | A0A8C5AKI5 | Synaptotagmin VIIb OS=Gadus morhua OX=8049 PE=4 SV=1                                                         | 11 | 2 | 8 | 2 | 451  | 50.7  | 8.65 | 20.49 | 2 | 1 |
| 6.1818E+17 | IsMasterProtein | A0A8C5A223 | Amyloid-beta A4 protein OS=Gadus morhua OX=8049 GN=APP PE=3 SV=1                                             | 9  | 5 | 7 | 5 | 775  | 87.8  | 4.81 | 20.46 | 5 | 1 |
| -7.325E+18 | IsMasterProtein | A0A8C4ZKN5 | Acidic (leucine-rich) nuclear phosphoprotein 32 family, member A OS=Gadus morhua OX=8049 GN=anp32a PE=3 SV=1 | 26 | 6 | 7 | 5 | 258  | 29.3  | 4.09 | 20.45 | 6 | 1 |
| -4.994E+18 | IsMasterProtein | A0A8C4ZJ04 | SCO-spondin OS=Gadus morhua OX=8049 PE=3 SV=1                                                                | 2  | 7 | 7 | 7 | 5002 | 534.9 | 5.72 | 20.42 | 7 | 1 |
| -6.633E+18 | IsMasterProtein | A0A8C5B6W1 | Uncharacterized protein OS=Gadus morhua OX=8049 PE=3 SV=1                                                    | 4  | 5 | 8 | 5 | 1531 | 169.9 | 8.27 | 20.35 | 5 | 1 |
| -5.339E+18 | IsMasterProtein | A0A8C4Z610 | 45 kDa calcium-binding protein OS=Gadus morhua OX=8049 GN=sdf4 PE=3 SV=1                                     | 17 | 6 | 8 | 6 | 354  | 41.5  | 4.73 | 20.35 | 6 | 1 |
| 3.2618E+18 | IsMasterProtein | A0A8C4ZHX5 | Vesicle amine transport 1 OS=Gadus morhua OX=8049 GN=vat1 PE=4 SV=1                                          | 21 | 6 | 7 | 6 | 466  | 51.4  | 6.13 | 20.29 | 6 | 1 |
| 2.2972E+18 | IsMasterProtein | A0A8C5B3H9 | Myosin, heavy chain 7B, cardiac muscle, beta a OS=Gadus morhua OX=8049 GN=myh7ba PE=3 SV=1                   | 5  | 7 | 9 | 2 | 1926 | 221.1 | 5.88 | 20.28 | 7 | 1 |
| -6.917E+18 | IsMasterProtein | A0A8C5FH52 | UDP-glucose glycoprotein glucosyltransferase 1 OS=Gadus morhua OX=8049 PE=3 SV=1                             | 7  | 8 | 8 | 2 | 1478 | 167.3 | 6.01 | 20.25 | 8 | 1 |
| 2.5632E+18 | IsMasterProtein | A0A8C5C2S4 | Uncharacterized protein OS=Gadus morhua OX=8049 PE=4 SV=1                                                    | 6  | 7 | 7 | 2 | 1536 | 172.5 | 6.21 | 20.25 | 7 | 1 |
| 5.5842E+18 | IsMasterProtein | A0A8C5BI96 | Zinc finger homeobox 4 OS=Gadus morhua OX=8049 GN=zfx4 PE=4 SV=1                                             | 3  | 5 | 8 | 5 | 3824 | 418.6 | 6.92 | 20.23 | 5 | 1 |
| 7.2487E+18 | IsMasterProtein | A0A8C5FVF2 | Myosin-9-like OS=Gadus morhua OX=8049 GN=LOC115540203 PE=3 SV=1                                              | 6  | 8 | 8 | 4 | 1917 | 222.1 | 5.49 | 20.2  | 8 | 1 |
| -2.859E+18 | IsMasterProtein | A0A8C4YW06 | 40S ribosomal protein S3a OS=Gadus morhua OX=8049 GN=tps3a PE=3 SV=1                                         | 32 | 8 | 8 | 8 | 266  | 30.1  | 9.73 | 20.09 | 8 | 1 |
| -7.916E+17 | IsMasterProtein | A0A8C5A5M0 | Deoxyribonuclease II OS=Gadus morhua OX=8049 GN=dnase2 PE=3 SV=1                                             | 24 | 7 | 7 | 7 | 406  | 44.1  | 8.24 | 20.09 | 7 | 1 |
| 2.8398E+18 | IsMasterProtein | A0A8C5BD17 | Ubiquitin carboxyl-terminal hydrolase 7 OS=Gadus morhua OX=8049 PE=3 SV=1                                    | 7  | 6 | 7 | 4 | 1190 | 138   | 5.82 | 20.08 | 6 | 1 |
| 4.7957E+18 | IsMasterProtein | A0A8C4Z931 | Phosphoglycerate mutase OS=Gadus morhua OX=8049 PE=3 SV=1                                                    | 25 | 6 | 7 | 6 | 362  | 41    | 7.77 | 20.04 | 6 | 1 |
| -5.575E+18 | IsMasterProtein | A0A8C5BF97 | Eukaryotic translation initiation factor 3 subunit C OS=Gadus morhua OX=8049 GN=EIF3C PE=3 SV=1              | 8  | 4 | 7 | 4 | 847  | 96.9  | 5.58 | 19.97 | 4 | 1 |



|                |                 |             |                                                                                                          |    |   |   |   |      |       |      |       |   |   |
|----------------|-----------------|-------------|----------------------------------------------------------------------------------------------------------|----|---|---|---|------|-------|------|-------|---|---|
| -<br>8.241E+18 | IsMasterProtein | A0A8C4ZJE4  | Elongation factor 1-beta OS=Gadus morhua OX=8049 GN=ecf1b2 PE=3 SV=1                                     | 20 | 3 | 6 | 3 | 231  | 25.2  | 4.67 | 19.96 | 3 | 1 |
| 5.2874E+18     | IsMasterProtein | A0A8C4ZD84  | Creatine kinase OS=Gadus morhua OX=8049 GN=ckbb PE=3 SV=1                                                | 27 | 7 | 7 | 7 | 381  | 42.8  | 5.6  | 19.9  | 7 | 1 |
| -<br>4.208E+18 | IsMasterProtein | A0A8C4ZRV6  | Major vault protein OS=Gadus morhua OX=8049 PE=4 SV=1                                                    | 11 | 7 | 7 | 7 | 847  | 94.4  | 6.19 | 19.85 | 7 | 1 |
| 6.9775E+18     | IsMasterProtein | A0A8C5AZJ5  | Uncharacterized protein OS=Gadus morhua OX=8049 PE=4 SV=1                                                | 8  | 2 | 4 | 2 | 222  | 23.8  | 6.25 | 19.82 | 2 | 1 |
| -<br>7.925E+18 | IsMasterProtein | A0A8C4ZBE7  | Nucleobindin 2a OS=Gadus morhua OX=8049 GN=nucb2a PE=3 SV=1                                              | 15 | 7 | 7 | 6 | 494  | 58.2  | 5.01 | 19.81 | 7 | 1 |
| -<br>3.204E+18 | IsMasterProtein | A0A8C5BJQ6  | Alpha-1,4 glucan phosphorylase OS=Gadus morhua OX=8049 GN=pygma PE=3 SV=1                                | 10 | 8 | 8 | 4 | 857  | 98.5  | 7.01 | 19.7  | 8 | 1 |
| 7.7279E+17     | IsMasterProtein | A0A8C4ZQU1  | Coatomer subunit alpha OS=Gadus morhua OX=8049 PE=4 SV=1                                                 | 9  | 6 | 8 | 6 | 1231 | 138.7 | 7.66 | 19.69 | 6 | 1 |
| -<br>4.159E+18 | IsMasterProtein | A0A8C5B5V2  | Ubiquitin-like modifier activating enzyme 1 OS=Gadus morhua OX=8049 GN=uba1 PE=3 SV=1                    | 8  | 7 | 7 | 7 | 1051 | 117.4 | 5.45 | 19.66 | 7 | 1 |
| 5.4119E+18     | IsMasterProtein | A0A8C5BZX6  | Aminopeptidase OS=Gadus morhua OX=8049 GN=LOC115558482 PE=3 SV=1                                         | 3  | 2 | 7 | 2 | 968  | 110.3 | 5.73 | 19.64 | 2 | 1 |
| -<br>6.881E+18 | IsMasterProtein | A0A8C4Z9J0  | DHRS-12 like SDR c-like domain-containing protein OS=Gadus morhua OX=8049 GN=LOC115561183 PE=4 SV=1      | 25 | 7 | 8 | 7 | 320  | 35.6  | 9.23 | 19.56 | 7 | 1 |
| -<br>7.058E+18 | IsMasterProtein | cRAP_P02768 | Serum albumin OS=Homo sapiens GN=ALB PE=1 SV=2                                                           | 12 | 6 | 7 | 6 | 609  | 69.3  | 6.28 | 19.52 | 6 | 1 |
| -<br>9.137E+18 | IsMasterProtein | A0A8C5CJX2  | T-complex protein 1 subunit gamma OS=Gadus morhua OX=8049 GN=cct3 PE=3 SV=1                              | 21 | 7 | 7 | 7 | 483  | 53.3  | 5.47 | 19.51 | 7 | 1 |
| -<br>8.987E+18 | IsMasterProtein | A0A8C4ZP25  | Selenoprotein F OS=Gadus morhua OX=8049 PE=3 SV=1                                                        | 36 | 4 | 6 | 4 | 115  | 12.9  | 4.37 | 19.46 | 4 | 1 |
| -<br>1.528E+18 | IsMasterProtein | A0A8C5CR74  | Transcription initiation factor TFIID subunit OS=Gadus morhua OX=8049 PE=3 SV=1                          | 6  | 5 | 7 | 5 | 1920 | 217.8 | 5.2  | 19.44 | 5 | 1 |
| 6.2986E+18     | IsMasterProtein | A0A8C5C3U3  | Midasin OS=Gadus morhua OX=8049 GN=MDN1 PE=3 SV=1                                                        | 3  | 5 | 7 | 5 | 4464 | 498.6 | 5.29 | 19.35 | 5 | 1 |
| -<br>7.788E+18 | IsMasterProtein | A0A8C4ZN68  | Keratin 15 OS=Gadus morhua OX=8049 PE=4 SV=1                                                             | 24 | 7 | 7 | 2 | 324  | 37    | 4.88 | 19.35 | 7 | 1 |
| -<br>6.73E+18  | IsMasterProtein | A0A8C4ZSI1  | IF rod domain-containing protein OS=Gadus morhua OX=8049 PE=3 SV=1                                       | 17 | 7 | 7 | 7 | 480  | 52.7  | 5.25 | 19.26 | 7 | 1 |
| -<br>6.837E+18 | IsMasterProtein | A0A8C4ZK56  | Arrestin domain containing 1a OS=Gadus morhua OX=8049 GN=arrdc1a PE=3 SV=1                               | 22 | 6 | 7 | 6 | 441  | 47.8  | 8.4  | 19.24 | 6 | 1 |
| 1.5354E+18     | IsMasterProtein | G0XNX7      | Peptidylprolyl isomerase OS=Gadus morhua OX=8049 GN=FKBP-1A PE=2 SV=1                                    | 33 | 3 | 6 | 3 | 108  | 11.7  | 7.28 | 19.22 | 3 | 1 |
| -<br>8.876E+18 | IsMasterProtein | A0A8C5B8E2  | Myosin light chain, phosphorylatable, fast skeletal muscle a OS=Gadus morhua OX=8049 GN=mylpfa PE=4 SV=1 | 31 | 6 | 7 | 3 | 164  | 18.3  | 4.49 | 19.17 | 6 | 1 |
| 5.4343E+18     | IsMasterProtein | A0A8C5BSA5  | Moesin-like OS=Gadus morhua OX=8049 GN=MSN PE=4 SV=1                                                     | 9  | 6 | 7 | 5 | 556  | 65.2  | 5.69 | 19.11 | 6 | 1 |
| 3.2848E+18     | IsMasterProtein | A0A8C5FC39  | Purine-rich element binding protein Aa OS=Gadus morhua OX=8049 GN=puraa PE=3 SV=1                        | 34 | 6 | 7 | 3 | 284  | 31.8  | 6.95 | 19.05 | 6 | 1 |

|                     |                     |                |                                                                                                                             |    |   |   |   |      |           |           |       |   |   |
|---------------------|---------------------|----------------|-----------------------------------------------------------------------------------------------------------------------------|----|---|---|---|------|-----------|-----------|-------|---|---|
| -<br>6.311E+1<br>8  | IsMasterProt<br>ein | A0A8C5BDN<br>2 | Phosphatidylinositol-5-phosphate 4-kinase, type II, alpha a OS=Gadus morhua OX=8049 PE=4 SV=1                               | 9  | 2 | 7 | 2 | 401  | 45.4      | 6.64      | 19.05 | 2 | 1 |
| -<br>6.266E+1<br>8  | IsMasterProt<br>ein | A0A8C5BN3<br>8 | Uncharacterized protein OS=Gadus morhua OX=8049 PE=4 SV=1                                                                   | 19 | 5 | 6 | 5 | 494  | 51.9      | 8.57      | 18.97 | 5 | 1 |
| -<br>7.244E+1<br>8  | IsMasterProt<br>ein | A0A8C5FXT<br>0 | HECT-type E3 ubiquitin transferase OS=Gadus morhua OX=8049 GN=HUWE1 PE=4 SV=1                                               | 3  | 6 | 6 | 6 | 4195 | 461.<br>6 | 5.39      | 18.87 | 6 | 1 |
| -<br>3.517E+1<br>8  | IsMasterProt<br>ein | A0A8C5FTW<br>0 | Insulin-like growth factor-binding protein 5 OS=Gadus morhua OX=8049 GN=LOC115533059 PE=4 SV=1                              | 26 | 3 | 5 | 3 | 257  | 28.3      | 8.38      | 18.82 | 3 | 1 |
| -<br>1.915E+1<br>8  | IsMasterProt<br>ein | A0A8C5F995     | Drebrin-like b OS=Gadus morhua OX=8049 PE=4 SV=1                                                                            | 14 | 5 | 7 | 5 | 470  | 52.1      | 9.51      | 18.76 | 5 | 1 |
| -<br>3.9403E+<br>17 | IsMasterProt<br>ein | A0A8C5ACF<br>0 | Superoxide dismutase [Cu-Zn] OS=Gadus morhua OX=8049 GN=SOD3 PE=3 SV=1                                                      | 20 | 3 | 6 | 3 | 205  | 22        | 6.71      | 18.73 | 3 | 1 |
| -<br>4.646E+1<br>8  | IsMasterProt<br>ein | A0A8C4ZFY<br>9 | Basement membrane-specific heparan sulfate proteoglycan core protein-like OS=Gadus morhua OX=8049 GN=LOC115539906 PE=4 SV=1 | 23 | 6 | 6 | 6 | 379  | 40.3      | 8.46      | 18.63 | 6 | 1 |
| -<br>6.9497E+<br>18 | IsMasterProt<br>ein | A0A8C5AYQ<br>8 | Neuroblast differentiation-associated protein AHNAK-like OS=Gadus morhua OX=8049 GN=LOC115544456 PE=4 SV=1                  | 2  | 7 | 7 | 7 | 5433 | 585.<br>7 | 5.31      | 18.61 | 7 | 1 |
| -<br>4.297E+1<br>8  | IsMasterProt<br>ein | A0A8C4YX1<br>3 | IF rod domain-containing protein OS=Gadus morhua OX=8049 PE=3 SV=1                                                          | 14 | 6 | 7 | 3 | 439  | 50.5      | 5.48      | 18.55 | 6 | 1 |
| -<br>8.487E+1<br>8  | IsMasterProt<br>ein | A0A8C5BYZ<br>0 | Glyceraldehyde-3-phosphate dehydrogenase OS=Gadus morhua OX=8049 GN=gapdh PE=3 SV=1                                         | 20 | 5 | 6 | 3 | 353  | 38.7      | 8.51      | 18.54 | 5 | 1 |
| -<br>5.884E+1<br>7  | IsMasterProt<br>ein | A0A8C5BRA<br>9 | MOB-like protein phoccin OS=Gadus morhua OX=8049 GN=LOC115533190 PE=3 SV=1                                                  | 71 | 6 | 7 | 6 | 99   | 10.8      | 8.1       | 18.51 | 6 | 1 |
| -<br>7.063E+1<br>8  | IsMasterProt<br>ein | A0A8C5F3L3     | Uncharacterized protein OS=Gadus morhua OX=8049 PE=3 SV=1                                                                   | 27 | 6 | 7 | 6 | 307  | 33.9      | 7.74      | 18.48 | 6 | 1 |
| -<br>3.421E+1<br>8  | IsMasterProt<br>ein | A0A8C4Z7X<br>4 | Serine/arginine-rich splicing factor 2 OS=Gadus morhua OX=8049 GN=srsf2b PE=3 SV=1                                          | 15 | 4 | 6 | 4 | 242  | 26.5      | 11.7<br>7 | 18.42 | 4 | 1 |
| -<br>2.553E+1<br>7  | IsMasterProt<br>ein | A0A8C4ZLQ<br>2 | Chitinase, di-N-acetyl- OS=Gadus morhua OX=8049 GN=ctbs PE=3 SV=1                                                           | 19 | 6 | 7 | 6 | 366  | 41.2      | 5.26      | 18.32 | 6 | 1 |
| -<br>7.898E+1<br>8  | IsMasterProt<br>ein | A0A8C5CHG<br>7 | Calcium/calmodulin-dependent protein kinase OS=Gadus morhua OX=8049 PE=3 SV=1                                               | 15 | 5 | 6 | 4 | 473  | 52.8      | 7.01      | 18.28 | 5 | 1 |
| -<br>4.7784E+<br>17 | IsMasterProt<br>ein | A0A8C5C0J0     | Transmembrane serine protease 9 OS=Gadus morhua OX=8049 PE=4 SV=1                                                           | 11 | 5 | 7 | 5 | 615  | 67        | 7.2       | 18.21 | 5 | 1 |
| -<br>7.246E+1<br>8  | IsMasterProt<br>ein | A0A8C5CSB<br>9 | VPS35 endosomal protein-sorting factor-like OS=Gadus morhua OX=8049 PE=3 SV=1                                               | 5  | 2 | 8 | 2 | 862  | 97.5      | 6.96      | 18.2  | 2 | 1 |
| -<br>2.78E+18       | IsMasterProt<br>ein | A0A8C5C3A<br>1 | Glucosidase 2 subunit beta OS=Gadus morhua OX=8049 GN=prkcsh PE=4 SV=1                                                      | 12 | 7 | 7 | 7 | 551  | 61.4      | 4.42      | 18.19 | 7 | 1 |
| -<br>7.332E+1<br>8  | IsMasterProt<br>ein | A0A8C5ABV<br>3 | DNA-directed RNA polymerase II subunit RPB7 OS=Gadus morhua OX=8049 GN=polr2g PE=3 SV=1                                     | 10 | 6 | 6 | 6 | 591  | 66.9      | 7.01      | 18.11 | 6 | 1 |
| -<br>4.145E+1<br>8  | IsMasterProt<br>ein | A0A8C5FMQ<br>9 | Dynein, axonemal, heavy chain 9 OS=Gadus morhua OX=8049 GN=dnah9 PE=3 SV=1                                                  | 3  | 7 | 7 | 7 | 4399 | 499.<br>2 | 5.76      | 18.07 | 7 | 1 |

|            |                 |            |                                                                                                                      |    |   |   |   |      |       |      |       |   |   |
|------------|-----------------|------------|----------------------------------------------------------------------------------------------------------------------|----|---|---|---|------|-------|------|-------|---|---|
| 9.0772E+17 | IsMasterProtein | A0A8C4ZQV6 | Low density lipoprotein receptor-related protein 11 OS=Gadus morhua OX=8049 GN=lrp11 PE=4 SV=1                       | 10 | 6 | 6 | 6 | 606  | 65.5  | 5.94 | 17.92 | 6 | 1 |
| 4.804E+18  | IsMasterProtein | A0A8C5CTF4 | Uncharacterized protein OS=Gadus morhua OX=8049 PE=3 SV=1                                                            | 22 | 6 | 6 | 6 | 482  | 52.9  | 7.43 | 17.85 | 6 | 1 |
| 9.18E+18   | IsMasterProtein | A0A8C5AID0 | Angiotensin-converting enzyme OS=Gadus morhua OX=8049 GN=ace PE=3 SV=1                                               | 5  | 5 | 6 | 5 | 1259 | 144.2 | 6.24 | 17.82 | 5 | 1 |
| 8.755E+18  | IsMasterProtein | A0A8C5A541 | Dynein, cytoplasmic 1, heavy chain 1 OS=Gadus morhua OX=8049 GN=DYNC1H1 PE=3 SV=1                                    | 2  | 7 | 7 | 7 | 4632 | 532.3 | 6.48 | 17.81 | 7 | 1 |
| 8.792E+18  | IsMasterProtein | A0A8C5CSC6 | Cochlin OS=Gadus morhua OX=8049 PE=4 SV=1                                                                            | 15 | 5 | 5 | 5 | 503  | 54.2  | 7.68 | 17.64 | 5 | 1 |
| 4.514E+18  | IsMasterProtein | A0A8C5F3L5 | DNA-(apurinic or apyrimidinic site) lyase OS=Gadus morhua OX=8049 GN=rps3 PE=3 SV=1                                  | 28 | 6 | 6 | 2 | 246  | 26.9  | 9.66 | 17.59 | 6 | 1 |
| 8.375E+18  | IsMasterProtein | A0A8C4ZGV9 | Calreticulin OS=Gadus morhua OX=8049 PE=3 SV=1                                                                       | 15 | 5 | 7 | 5 | 424  | 48.9  | 4.48 | 17.56 | 5 | 1 |
| 6.115E+18  | IsMasterProtein | A0A8C4YXY3 | Alpha-1,4 glucan phosphorylase OS=Gadus morhua OX=8049 PE=3 SV=1                                                     | 10 | 7 | 7 | 5 | 845  | 96.8  | 6.21 | 17.51 | 7 | 1 |
| 8.305E+18  | IsMasterProtein | A0A8C4ZKH5 | Anterior gradient 2 OS=Gadus morhua OX=8049 GN=agr2 PE=4 SV=1                                                        | 24 | 4 | 7 | 4 | 170  | 19.7  | 8.9  | 17.47 | 4 | 1 |
| 7.577E+18  | IsMasterProtein | A0A8C4ZQM6 | Uncharacterized protein OS=Gadus morhua OX=8049 PE=4 SV=1                                                            | 9  | 5 | 6 | 5 | 741  | 83.5  | 6.44 | 17.45 | 5 | 1 |
| 6.325E+18  | IsMasterProtein | A0A8C5AQ01 | Uncharacterized protein OS=Gadus morhua OX=8049 PE=4 SV=1                                                            | 4  | 6 | 7 | 6 | 2505 | 266.9 | 6.05 | 17.4  | 6 | 1 |
| 7.363E+18  | IsMasterProtein | A0A8C4ZRZ7 | Collagen, type XI, alpha 1a OS=Gadus morhua OX=8049 PE=4 SV=1                                                        | 6  | 6 | 7 | 6 | 1270 | 133.2 | 5.05 | 17.36 | 6 | 1 |
| 6.208E+18  | IsMasterProtein | A0A8C5CKI2 | T-complex protein 1 subunit theta OS=Gadus morhua OX=8049 GN=cct8 PE=3 SV=1                                          | 15 | 6 | 6 | 6 | 494  | 53.9  | 6    | 17.36 | 6 | 1 |
| 1.971E+18  | IsMasterProtein | A0A8C4Z6P9 | Citrate synthase OS=Gadus morhua OX=8049 GN=cs PE=3 SV=1                                                             | 15 | 6 | 7 | 6 | 446  | 49.6  | 6.96 | 17.3  | 6 | 1 |
| 3.019E+18  | IsMasterProtein | A0A8C5FVZ1 | Polyadenylate-binding protein OS=Gadus morhua OX=8049 PE=3 SV=1                                                      | 13 | 7 | 8 | 5 | 620  | 69.6  | 9.41 | 17.29 | 7 | 1 |
| 3.067E+18  | IsMasterProtein | A0A8C5CSH1 | HECT domain containing 3 OS=Gadus morhua OX=8049 GN=hectd3 PE=4 SV=1                                                 | 5  | 2 | 6 | 2 | 869  | 97.5  | 5.31 | 17.2  | 2 | 1 |
| 1.2924E+18 | IsMasterProtein | A0A8C5A4I1 | Macrophage migration inhibitory factor OS=Gadus morhua OX=8049 GN=mif PE=3 SV=1                                      | 44 | 5 | 6 | 5 | 114  | 12.2  | 6.52 | 17.2  | 5 | 1 |
| 6.5021E+18 | IsMasterProtein | A0A8C5AZX1 | Protein S100 OS=Gadus morhua OX=8049 GN=s100a10a PE=3 SV=1                                                           | 46 | 4 | 6 | 4 | 101  | 11.3  | 5.53 | 17.17 | 4 | 1 |
| 7.651E+18  | IsMasterProtein | A0A8C4Z0E3 | Acidic leucine-rich nuclear phosphoprotein 32 family member D-like OS=Gadus morhua OX=8049 GN=LOC115529167 PE=3 SV=1 | 28 | 6 | 7 | 4 | 253  | 28.5  | 4.02 | 17.1  | 6 | 1 |
| 1.911E+18  | IsMasterProtein | A0A8C5B2F2 | Uncharacterized LOC115544441 OS=Gadus morhua OX=8049 GN=zgc:153867 PE=4 SV=1                                         | 23 | 4 | 6 | 4 | 155  | 17.4  | 4.75 | 17.04 | 4 | 1 |
| 4.7262E+18 | IsMasterProtein | A0A8C5F7Q4 | Growth/differentiation factor 8 OS=Gadus morhua OX=8049 GN=mstnb PE=3 SV=1                                           | 14 | 6 | 6 | 6 | 374  | 42.2  | 6.1  | 17.01 | 6 | 1 |

|                |                 |            |                                                                                                             |    |   |   |   |      |       |      |       |   |   |
|----------------|-----------------|------------|-------------------------------------------------------------------------------------------------------------|----|---|---|---|------|-------|------|-------|---|---|
| 8.7622E+17     | IsMasterProtein | A0A8C5BX15 | Cadherin-2-like OS=Gadus morhua OX=8049 GN=CDH2 PE=4 SV=1                                                   | 7  | 6 | 6 | 6 | 1154 | 127.3 | 5.11 | 16.96 | 6 | 1 |
| -<br>9.003E+18 | IsMasterProtein | A0A8C5CCM1 | Unconventional myosin-VI OS=Gadus morhua OX=8049 GN=MYO6 PE=3 SV=1                                          | 8  | 6 | 6 | 6 | 1269 | 145.8 | 8.59 | 16.93 | 6 | 1 |
| 2.9705E+18     | IsMasterProtein | A0A8C4ZF29 | Collagen, type X, alpha 1a OS=Gadus morhua OX=8049 GN=col10a1a PE=4 SV=1                                    | 15 | 4 | 6 | 4 | 661  | 62.6  | 7.01 | 16.89 | 4 | 1 |
| -<br>2.746E+18 | IsMasterProtein | A0A8C5AY83 | Apolipoprotein Bb, tandem duplicate 1 OS=Gadus morhua OX=8049 PE=4 SV=1                                     | 3  | 6 | 6 | 6 | 4505 | 496   | 6.52 | 16.81 | 6 | 1 |
| -<br>5.405E+18 | IsMasterProtein | A0A8C5CVP9 | Carboxypeptidase OS=Gadus morhua OX=8049 GN=scepe1 PE=3 SV=1                                                | 14 | 6 | 6 | 6 | 437  | 48    | 5.14 | 16.78 | 6 | 1 |
| -<br>5.027E+18 | IsMasterProtein | A0A8C5D153 | Asparaginyl-tRNA synthetase 1 OS=Gadus morhua OX=8049 GN=NARS1 PE=4 SV=1                                    | 12 | 6 | 6 | 6 | 512  | 58.5  | 6.87 | 16.78 | 6 | 1 |
| 6.8602E+18     | IsMasterProtein | A0A8C5ATN1 | Ras association domain family member 3 OS=Gadus morhua OX=8049 GN=rassf3 PE=4 SV=1                          | 9  | 2 | 7 | 2 | 448  | 50.6  | 8.19 | 16.76 | 2 | 1 |
| -<br>5.575E+18 | IsMasterProtein | A0A8C5B0Y6 | Pyruvate dehydrogenase E1 component subunit alpha OS=Gadus morhua OX=8049 PE=4 SV=1                         | 19 | 4 | 6 | 3 | 387  | 42.8  | 7.02 | 16.73 | 4 | 1 |
| -<br>8.863E+18 | IsMasterProtein | A0A8C5F9E5 | Cathepsin H OS=Gadus morhua OX=8049 GN=CTSH PE=3 SV=1                                                       | 25 | 6 | 6 | 6 | 310  | 34.4  | 5.45 | 16.7  | 6 | 1 |
| -<br>4.976E+18 | IsMasterProtein | A0A8C4ZL50 | Superoxide dismutase [Cu-Zn] OS=Gadus morhua OX=8049 GN=sod1 PE=3 SV=1                                      | 33 | 3 | 5 | 3 | 154  | 15.8  | 6.51 | 16.67 | 3 | 1 |
| -<br>5.658E+18 | IsMasterProtein | A0A8C5FS14 | Gamma-tubulin complex component OS=Gadus morhua OX=8049 GN=tubgcp3 PE=3 SV=1                                | 4  | 2 | 6 | 2 | 913  | 103.1 | 8.27 | 16.66 | 2 | 1 |
| -<br>4.68E+18  | IsMasterProtein | A0A8C5CLP8 | UDP-glucose 6-dehydrogenase OS=Gadus morhua OX=8049 GN=ugdh PE=3 SV=1                                       | 16 | 5 | 6 | 5 | 480  | 53.3  | 8.07 | 16.63 | 5 | 1 |
| 2.7861E+18     | IsMasterProtein | A0A8C5BRT6 | Histone-lysine N-methyltransferase, H3 lysine-79 specific OS=Gadus morhua OX=8049 GN=dot11 PE=3 SV=1        | 10 | 5 | 6 | 5 | 1269 | 137.1 | 8.87 | 16.61 | 5 | 1 |
| -<br>5.343E+18 | IsMasterProtein | A0A8C5ANT8 | Actinin alpha 3b OS=Gadus morhua OX=8049 PE=4 SV=1                                                          | 6  | 5 | 6 | 3 | 1003 | 114.6 | 5.67 | 16.58 | 5 | 1 |
| -<br>7.502E+18 | IsMasterProtein | A0A8C5BZA9 | Structural maintenance of chromosomes protein OS=Gadus morhua OX=8049 PE=3 SV=1                             | 6  | 4 | 7 | 4 | 1222 | 142   | 7.12 | 16.46 | 4 | 1 |
| 2.025E+18      | IsMasterProtein | A0A8C4ZS41 | Insulin-like growth factor binding protein, acid labile subunit OS=Gadus morhua OX=8049 GN=igfals PE=4 SV=1 | 14 | 6 | 6 | 6 | 577  | 64.9  | 7.03 | 16.43 | 6 | 1 |
| -<br>3.463E+18 | IsMasterProtein | A8CZC9     | Elongation factor 1-alpha OS=Gadus morhua OX=8049 PE=2 SV=1                                                 | 15 | 6 | 6 | 6 | 461  | 50.1  | 9.14 | 16.38 | 6 | 1 |
| -<br>8.254E+18 | IsMasterProtein | A0A8C4Z572 | Neurofilament medium polypeptide OS=Gadus morhua OX=8049 GN=nefh PE=3 SV=1                                  | 18 | 7 | 7 | 6 | 870  | 98.5  | 4.81 | 16.28 | 7 | 1 |
| -<br>7.767E+17 | IsMasterProtein | A0A8C4ZDQ0 | 40S ribosomal protein S2 OS=Gadus morhua OX=8049 GN=rps2 PE=3 SV=1                                          | 27 | 6 | 6 | 6 | 278  | 30.1  | 10.2 | 16.26 | 6 | 1 |
| -<br>8.962E+18 | IsMasterProtein | A0A8C5BNI1 | ATP-binding cassette, sub-family A (ABC1), member 1B OS=Gadus morhua OX=8049 GN=abca1b PE=4 SV=1            | 6  | 6 | 6 | 4 | 2267 | 252.5 | 6.51 | 16.2  | 6 | 1 |
| -<br>2.451E+17 | IsMasterProtein | A0A8C4ZKD5 | Retinol binding protein 4, plasma OS=Gadus morhua OX=8049 GN=rbp4 PE=3 SV=1                                 | 27 | 6 | 6 | 6 | 195  | 22.5  | 6.1  | 16.19 | 6 | 1 |

|            |                 |            |                                                                                                              |    |   |   |   |      |       |      |       |   |   |
|------------|-----------------|------------|--------------------------------------------------------------------------------------------------------------|----|---|---|---|------|-------|------|-------|---|---|
| 2.1905E+18 | IsMasterProtein | A0A8C4ZXA3 | Peptidyl-prolyl cis-trans isomerase OS=Gadus morhua OX=8049 GN=LOC115531931 PE=3 SV=1                        | 29 | 4 | 6 | 4 | 164  | 17.6  | 8.16 | 16.11 | 4 | 1 |
| 6.842E+18  | IsMasterProtein | A0A8C5AUM7 | ATP-binding cassette, sub-family B (MDR/TAP), member 7 OS=Gadus morhua OX=8049 GN=ABCB7 PE=4 SV=1            | 36 | 6 | 6 | 6 | 224  | 24    | 7.91 | 16.08 | 6 | 1 |
| 6.614E+18  | IsMasterProtein | A0A8C5BP87 | Leukotriene A(4) hydrolase OS=Gadus morhua OX=8049 GN=lta4h PE=3 SV=1                                        | 8  | 4 | 6 | 4 | 613  | 69.3  | 6.18 | 15.93 | 4 | 1 |
| 1.179E+18  | IsMasterProtein | A0A8C5FA58 | Uncharacterized protein OS=Gadus morhua OX=8049 PE=3 SV=1                                                    | 7  | 2 | 5 | 2 | 922  | 101.5 | 6.87 | 15.9  | 2 | 1 |
| 2.495E+18  | IsMasterProtein | A0A8C5CK05 | Calumenin b OS=Gadus morhua OX=8049 GN=calub PE=3 SV=1                                                       | 17 | 5 | 5 | 5 | 315  | 37.1  | 4.58 | 15.87 | 5 | 1 |
| 5.365E+15  | IsMasterProtein | A0A8C5F9R8 | Uncharacterized protein OS=Gadus morhua OX=8049 PE=4 SV=1                                                    | 3  | 4 | 6 | 4 | 2843 | 307.8 | 5.27 | 15.82 | 4 | 1 |
| 1.819E+18  | IsMasterProtein | A0A8C5ATB3 | Clathrin light chain OS=Gadus morhua OX=8049 GN=clta PE=3 SV=1                                               | 28 | 4 | 6 | 4 | 204  | 22.4  | 4.45 | 15.79 | 4 | 1 |
| 7.546E+18  | IsMasterProtein | A0A8C4YVL0 | G protein-coupled receptor, class C, group 5, member C OS=Gadus morhua OX=8049 GN=gprc5c PE=4 SV=1           | 15 | 5 | 6 | 5 | 416  | 44    | 6.33 | 15.78 | 5 | 1 |
| 4.335E+18  | IsMasterProtein | A0A8C5F6K3 | Glucose-6-phosphate 1-dehydrogenase OS=Gadus morhua OX=8049 GN=g6pd PE=3 SV=1                                | 13 | 6 | 6 | 6 | 513  | 58.8  | 7.15 | 15.72 | 6 | 1 |
| 3.975E+18  | IsMasterProtein | A0A8C5CD81 | N-acetylglucosamine-6-sulfatase OS=Gadus morhua OX=8049 GN=gnsb PE=3 SV=1                                    | 17 | 6 | 6 | 5 | 516  | 57.1  | 6.92 | 15.72 | 6 | 1 |
| 7.397E+18  | IsMasterProtein | A0A8C5BYD6 | Dynein, axonemal, heavy chain 6 OS=Gadus morhua OX=8049 PE=3 SV=1                                            | 3  | 6 | 6 | 6 | 3993 | 449.6 | 5.57 | 15.71 | 6 | 1 |
| 6.658E+18  | IsMasterProtein | A0A8C5BGD2 | Solute carrier family 12 member 5 OS=Gadus morhua OX=8049 GN=slc12a5 PE=3 SV=1                               | 3  | 3 | 7 | 2 | 1153 | 126.4 | 5.92 | 15.68 | 3 | 1 |
| 5.938E+17  | IsMasterProtein | A0A8C5FKX2 | Retinol binding protein 4, like OS=Gadus morhua OX=8049 GN=rbp4l PE=3 SV=1                                   | 13 | 2 | 5 | 2 | 196  | 21.7  | 4.96 | 15.66 | 2 | 1 |
| 2.1367E+18 | IsMasterProtein | A0A8C5A4X7 | Rho guanine nucleotide exchange factor (GEF) 10 OS=Gadus morhua OX=8049 PE=4 SV=1                            | 4  | 4 | 7 | 2 | 1618 | 175.9 | 6    | 15.62 | 4 | 1 |
| 1.062E+18  | IsMasterProtein | A0A8C5A2Q7 | N-acetylglucosamine-6-sulfatase OS=Gadus morhua OX=8049 PE=3 SV=1                                            | 12 | 5 | 5 | 4 | 523  | 58.2  | 6.47 | 15.62 | 5 | 1 |
| 8.613E+18  | IsMasterProtein | A0A8C5FNP9 | Inter-alpha-trypsin inhibitor heavy chain 2 OS=Gadus morhua OX=8049 PE=3 SV=1                                | 7  | 5 | 5 | 5 | 850  | 94.9  | 7.12 | 15.58 | 5 | 1 |
| 9.215E+18  | IsMasterProtein | A0A8C5BGE1 | Uncharacterized LOC115541375 OS=Gadus morhua OX=8049 GN=LOC115541375 PE=4 SV=1                               | 6  | 4 | 5 | 4 | 858  | 93.5  | 8.1  | 15.51 | 4 | 1 |
| 6.005E+18  | IsMasterProtein | A0A8C5BJB9 | Lamin-A-like OS=Gadus morhua OX=8049 GN=LOC115535752 PE=3 SV=1                                               | 10 | 6 | 6 | 5 | 650  | 72.5  | 7.18 | 15.5  | 6 | 1 |
| 1.545E+18  | IsMasterProtein | A0A8C4Z277 | Tumor necrosis factor receptor superfamily member 11B-like OS=Gadus morhua OX=8049 GN=TNFRSF11B PE=4 SV=1    | 16 | 5 | 6 | 5 | 434  | 48    | 8.38 | 15.41 | 5 | 1 |
| 3.3838E+18 | IsMasterProtein | A0A8C5F8Z6 | Acidic (leucine-rich) nuclear phosphoprotein 32 family, member B OS=Gadus morhua OX=8049 GN=anp32b PE=3 SV=1 | 17 | 5 | 5 | 3 | 266  | 29.8  | 4.01 | 15.35 | 5 | 1 |

|                    |                     |                |                                                                                                      |    |   |   |   |      |           |           |       |   |   |
|--------------------|---------------------|----------------|------------------------------------------------------------------------------------------------------|----|---|---|---|------|-----------|-----------|-------|---|---|
| -<br>4.585E+1<br>8 | IsMasterProt<br>ein | A0A8C5BQ6<br>4 | Inactive carboxypeptidase-like protein X2 OS=Gadus morhua OX=8049<br>GN=si:ch1073-459j12.1 PE=3 SV=1 | 6  | 6 | 6 | 6 | 1257 | 141.<br>5 | 4.96      | 15.32 | 6 | 1 |
| -<br>8.765E+1<br>8 | IsMasterProt<br>ein | A0A8C5B2K<br>4 | Cartilage acidic protein 1a OS=Gadus morhua OX=8049 GN=crtac1a<br>PE=4 SV=1                          | 16 | 4 | 6 | 4 | 546  | 58.4      | 5.39      | 15.14 | 4 | 1 |
| -2.2E+18           | IsMasterProt<br>ein | A0A8C5BAX<br>3 | Anion exchange protein OS=Gadus morhua OX=8049 PE=3 SV=1                                             | 6  | 3 | 5 | 3 | 860  | 95.3      | 6.1       | 15.14 | 3 | 1 |
| 2.4042E+<br>18     | IsMasterProt<br>ein | A0A8C4ZSJ7     | Ribosomal protein S4 X-linked OS=Gadus morhua OX=8049 PE=3 SV=1                                      | 25 | 6 | 6 | 6 | 307  | 34.4      | 10.0<br>2 | 15.05 | 6 | 1 |
| 9.7518E+<br>17     | IsMasterProt<br>ein | A0A8C4ZKX<br>9 | Carbonic anhydrase OS=Gadus morhua OX=8049 PE=3 SV=1                                                 | 23 | 4 | 5 | 4 | 262  | 29.2      | 7.85      | 15.01 | 4 | 1 |
| -<br>7.777E+1<br>8 | IsMasterProt<br>ein | A0A8C5CEJ5     | Uncharacterized protein OS=Gadus morhua OX=8049 PE=4 SV=1                                            | 14 | 5 | 5 | 2 | 399  | 44        | 6.76      | 14.95 | 5 | 1 |
| -<br>5.023E+1<br>8 | IsMasterProt<br>ein | A0A8C5FQ3<br>4 | S-adenosylhomocysteine hydrolase-like protein 1 OS=Gadus morhua<br>OX=8049 GN=LOC115557210 PE=3 SV=1 | 13 | 6 | 6 | 6 | 569  | 63.2      | 7.28      | 14.94 | 6 | 1 |
| 2.8512E+<br>18     | IsMasterProt<br>ein | A0A8C5CU2<br>9 | Microtubule-associated protein 1Ab OS=Gadus morhua OX=8049<br>GN=map1ab PE=4 SV=1                    | 3  | 6 | 6 | 6 | 4191 | 459.<br>8 | 4.7       | 14.94 | 6 | 1 |
| -<br>5.878E+1<br>8 | IsMasterProt<br>ein | A0A8C5CYX<br>9 | Cold-inducible RNA-binding protein B-like OS=Gadus morhua OX=8049<br>GN=CIRBP PE=4 SV=1              | 18 | 4 | 6 | 4 | 332  | 36.3      | 8.16      | 14.93 | 4 | 1 |
| -<br>2.253E+1<br>8 | IsMasterProt<br>ein | A0A8C5F819     | Apolipoprotein A-I-like OS=Gadus morhua OX=8049<br>GN=LOC115553333 PE=3 SV=1                         | 21 | 5 | 6 | 5 | 255  | 28.7      | 4.84      | 14.91 | 5 | 1 |
| 4.0362E+<br>18     | IsMasterProt<br>ein | A0A8C4Z4U<br>8 | Ribosomal protein L7 OS=Gadus morhua OX=8049 GN=RPL7 PE=3<br>SV=1                                    | 31 | 5 | 5 | 5 | 245  | 28.6      | 10.9<br>9 | 14.86 | 5 | 1 |
| -<br>9.959E+1<br>7 | IsMasterProt<br>ein | A0A8C5AJB<br>0 | Liprin-alpha-3-like OS=Gadus morhua OX=8049 GN=LOC115531422<br>PE=3 SV=1                             | 8  | 4 | 5 | 4 | 1234 | 138.<br>2 | 6.02      | 14.85 | 4 | 1 |
| 1.442E+1<br>8      | IsMasterProt<br>ein | A0A8C5BP15     | Dynein, axonemal, heavy chain 5 OS=Gadus morhua OX=8049 PE=3<br>SV=1                                 | 3  | 5 | 5 | 5 | 4256 | 485.<br>9 | 6.67      | 14.82 | 5 | 1 |
| -<br>7.213E+1<br>8 | IsMasterProt<br>ein | A0A8C4ZQ3<br>2 | Phosphopyruvate hydratase OS=Gadus morhua OX=8049 GN=eno2 PE=3<br>SV=1                               | 12 | 4 | 5 | 2 | 472  | 51.3      | 5.67      | 14.81 | 4 | 1 |
| 7.3776E+<br>18     | IsMasterProt<br>ein | A0A8C5ALF<br>5 | V-type proton ATPase subunit G OS=Gadus morhua OX=8049<br>GN=atp6v1g1 PE=3 SV=1                      | 57 | 5 | 5 | 5 | 118  | 13.3      | 9.85      | 14.8  | 5 | 1 |
| -<br>1.117E+1<br>8 | IsMasterProt<br>ein | A0A8C5CH<br>W4 | Eukaryotic translation initiation factor 4 gamma, 1a OS=Gadus morhua<br>OX=8049 GN=eif4g1a PE=3 SV=1 | 5  | 6 | 6 | 2 | 1841 | 197.<br>8 | 6.01      | 14.78 | 6 | 1 |
| -<br>5.791E+1<br>8 | IsMasterProt<br>ein | A0A8C4ZA1<br>9 | Transaldolase OS=Gadus morhua OX=8049 GN=taldo1 PE=3 SV=1                                            | 20 | 5 | 5 | 5 | 338  | 37.8      | 6.47      | 14.73 | 5 | 1 |
| 3.9431E+<br>18     | IsMasterProt<br>ein | A0A8C5F4R<br>5 | Fibrinogen C-terminal domain-containing protein OS=Gadus morhua<br>OX=8049 PE=4 SV=1                 | 24 | 5 | 5 | 5 | 264  | 29.5      | 6.42      | 14.72 | 5 | 1 |
| -<br>2.78E+18      | IsMasterProt<br>ein | A0A8C5FW<br>H1 | Complement component 7a OS=Gadus morhua OX=8049 GN=c7a PE=3<br>SV=1                                  | 11 | 6 | 6 | 6 | 857  | 94.7      | 6.39      | 14.7  | 6 | 1 |
| -<br>5.581E+1<br>8 | IsMasterProt<br>ein | A0A8C5ARP<br>2 | NSFL1 cofactor p47 OS=Gadus morhua OX=8049 PE=4 SV=1                                                 | 18 | 5 | 5 | 5 | 402  | 44.1      | 5.21      | 14.69 | 5 | 1 |
| 7.6513E+<br>18     | IsMasterProt<br>ein | A0A8C5B2A<br>5 | Glypican-1 OS=Gadus morhua OX=8049 GN=gpc1a PE=3 SV=1                                                | 18 | 5 | 5 | 5 | 544  | 59.7      | 7.39      | 14.66 | 5 | 1 |
| -<br>3.196E+1<br>8 | IsMasterProt<br>ein | A0A8C4ZU9<br>5 | Uncharacterized protein OS=Gadus morhua OX=8049 PE=3 SV=1                                            | 8  | 5 | 6 | 3 | 820  | 91.5      | 6.99      | 14.65 | 5 | 1 |



|                |                 |            |                                                                                                        |    |   |   |   |      |       |       |       |   |   |
|----------------|-----------------|------------|--------------------------------------------------------------------------------------------------------|----|---|---|---|------|-------|-------|-------|---|---|
| -<br>7.595E+18 | IsMasterProtein | A0A8C4Z972 | Serine and arginine rich splicing factor 3b OS=Gadus morhua OX=8049 GN=srsf3b PE=4 SV=1                | 25 | 4 | 5 | 4 | 165  | 19.3  | 11.71 | 14.62 | 4 | 1 |
| -<br>4.213E+18 | IsMasterProtein | A0A8C5BNQ0 | Glutamate receptor OS=Gadus morhua OX=8049 GN=gria4b PE=3 SV=1                                         | 4  | 3 | 5 | 3 | 904  | 101.1 | 7.78  | 14.57 | 3 | 1 |
| -<br>4.794E+18 | IsMasterProtein | A0A8C5BUC6 | 40S ribosomal protein S8 OS=Gadus morhua OX=8049 GN=rps8a PE=3 SV=1                                    | 28 | 5 | 5 | 5 | 204  | 23.7  | 10.3  | 14.52 | 5 | 1 |
| -<br>9.083E+18 | IsMasterProtein | A0A8C5BU29 | Trinucleotide repeat-containing gene 6C protein-like OS=Gadus morhua OX=8049 GN=LOC115560677 PE=4 SV=1 | 5  | 4 | 6 | 4 | 2011 | 207.6 | 7.15  | 14.47 | 4 | 1 |
| -<br>7.069E+18 | IsMasterProtein | A0A8C5CTK9 | Ezrin a OS=Gadus morhua OX=8049 GN=ezra PE=4 SV=1                                                      | 10 | 5 | 5 | 4 | 586  | 68.9  | 5.99  | 14.43 | 5 | 1 |
| -<br>5.055E+17 | IsMasterProtein | A0A8C4ZHI6 | Sulfhydryl oxidase OS=Gadus morhua OX=8049 PE=3 SV=1                                                   | 10 | 5 | 5 | 5 | 831  | 92.1  | 5.71  | 14.38 | 5 | 1 |
| -<br>7.377E+18 | IsMasterProtein | A0A8C4ZGK7 | Cytochrome c oxidase assembly protein COX18, mitochondrial OS=Gadus morhua OX=8049 GN=igfbp7 PE=4 SV=1 | 26 | 5 | 5 | 5 | 261  | 26.9  | 6.33  | 14.38 | 5 | 1 |
| -<br>6.869E+18 | IsMasterProtein | A0A8C5BPU0 | Solute carrier family 25 member 24 OS=Gadus morhua OX=8049 GN=slc25a24 PE=3 SV=1                       | 15 | 4 | 5 | 4 | 463  | 51.5  | 8.87  | 14.36 | 4 | 1 |
| -<br>7.912E+18 | IsMasterProtein | A0A8C4ZKU0 | Metalloproteinase inhibitor 2 OS=Gadus morhua OX=8049 GN=LOC115556743 PE=3 SV=1                        | 16 | 4 | 5 | 4 | 220  | 24.6  | 5.17  | 14.36 | 4 | 1 |
| -<br>7.356E+18 | IsMasterProtein | A0A8C5C738 | Tankyrase bdg C domain-containing protein OS=Gadus morhua OX=8049 PE=4 SV=1                            | 8  | 6 | 6 | 6 | 1081 | 129.4 | 5.03  | 14.36 | 6 | 1 |
| -<br>3.073E+18 | IsMasterProtein | A0A8C5AEG3 | Small G protein signaling modulator 1-like OS=Gadus morhua OX=8049 GN=LOC115541359 PE=4 SV=1           | 4  | 3 | 6 | 3 | 1315 | 146.2 | 5.41  | 14.3  | 3 | 1 |
| -<br>1.86E+18  | IsMasterProtein | A0A8C5B6I8 | Myelin basic protein OS=Gadus morhua OX=8049 PE=3 SV=1                                                 | 30 | 4 | 5 | 4 | 125  | 13.6  | 9.95  | 14.29 | 4 | 1 |
| -<br>7.028E+18 | IsMasterProtein | A0A8C5AJ03 | RNA helicase OS=Gadus morhua OX=8049 GN=evplb PE=3 SV=1                                                | 10 | 5 | 5 | 2 | 676  | 75    | 9.29  | 14.28 | 5 | 1 |
| -<br>5.681E+18 | IsMasterProtein | A0A8C5C8V5 | Collagen, type XII, alpha 1a OS=Gadus morhua OX=8049 PE=4 SV=1                                         | 4  | 6 | 6 | 6 | 3004 | 326.2 | 5.44  | 14.28 | 6 | 1 |
| -<br>2.494E+18 | IsMasterProtein | A0A8C5F3W4 | ST13 Hsp70 interacting protein OS=Gadus morhua OX=8049 GN=st13 PE=3 SV=1                               | 14 | 5 | 5 | 5 | 398  | 42.2  | 5.21  | 14.18 | 5 | 1 |
| -<br>1.375E+18 | IsMasterProtein | A0A8C5AP84 | Betaine--homocysteine S-methyltransferase 1 OS=Gadus morhua OX=8049 GN=LOC115545185 PE=4 SV=1          | 10 | 4 | 5 | 4 | 391  | 42.9  | 7.01  | 14.15 | 4 | 1 |
| -<br>7.567E+18 | IsMasterProtein | A0A8C5FS69 | Endoplasmic reticulum protein 44 OS=Gadus morhua OX=8049 PE=4 SV=1                                     | 14 | 4 | 5 | 4 | 395  | 45.2  | 5.44  | 14.09 | 4 | 1 |
| -<br>5.893E+17 | IsMasterProtein | A0A8C4Z9B2 | Proteasome subunit alpha type OS=Gadus morhua OX=8049 GN=psma6b PE=3 SV=1                              | 23 | 5 | 5 | 5 | 246  | 27.3  | 6.87  | 14.08 | 5 | 1 |
| -<br>8.968E+18 | IsMasterProtein | A0A8C5C066 | Procollagen, type IX, alpha 2 OS=Gadus morhua OX=8049 GN=col9a2 PE=4 SV=1                              | 13 | 6 | 6 | 6 | 691  | 64.8  | 9.14  | 14.08 | 6 | 1 |
| -<br>5.426E+18 | IsMasterProtein | A0A8C5BS82 | Metalloendopeptidase OS=Gadus morhua OX=8049 PE=4 SV=1                                                 | 15 | 4 | 5 | 4 | 283  | 32    | 8.78  | 14.03 | 4 | 1 |
| -<br>1.828E+18 | IsMasterProtein | A0A8C5BIA0 | Formin-like OS=Gadus morhua OX=8049 GN=FMN1 PE=3 SV=1                                                  | 7  | 6 | 6 | 6 | 1401 | 152.1 | 6.61  | 14.01 | 6 | 1 |

|                |                 |             |                                                                                                              |    |   |   |   |      |       |      |       |   |   |
|----------------|-----------------|-------------|--------------------------------------------------------------------------------------------------------------|----|---|---|---|------|-------|------|-------|---|---|
| -<br>9.056E+18 | IsMasterProtein | A0A8C5AUL3  | Hemopexin-like OS=Gadus morhua OX=8049 GN=LOC115542094 PE=4 SV=1                                             | 14 | 5 | 5 | 3 | 447  | 49.6  | 6.13 | 14    | 5 | 1 |
| 1.5373E+18     | IsMasterProtein | A0A8C5C1P6  | Small nuclear ribonucleoprotein 200 (U5) OS=Gadus morhua OX=8049 GN=SNRNP200 PE=3 SV=1                       | 3  | 5 | 5 | 5 | 2083 | 238.2 | 6.09 | 13.97 | 5 | 1 |
| 1.3081E+18     | IsMasterProtein | A0A8C4ZEE4  | Fatty acid-binding protein, heart-like OS=Gadus morhua OX=8049 GN=LOC115535639 PE=3 SV=1                     | 18 | 3 | 5 | 2 | 132  | 14.9  | 5.71 | 13.92 | 3 | 1 |
| 3.7442E+18     | IsMasterProtein | A0A8C5ALD2  | Fibulin-1 OS=Gadus morhua OX=8049 GN=fbln1 PE=3 SV=1                                                         | 10 | 5 | 5 | 5 | 767  | 83.4  | 5.5  | 13.92 | 5 | 1 |
| -<br>5.595E+18 | IsMasterProtein | A0A8C5BQ62  | Protein NO VEIN-like OS=Gadus morhua OX=8049 GN=wu:fj29h11 PE=4 SV=1                                         | 3  | 5 | 5 | 2 | 3213 | 353.4 | 6.21 | 13.87 | 5 | 1 |
| 1.6004E+16     | IsMasterProtein | A0A8C5B400  | Cyclin-dependent kinase 5 activator OS=Gadus morhua OX=8049 GN=LOC115534416 PE=3 SV=1                        | 10 | 3 | 6 | 2 | 364  | 38.6  | 9.45 | 13.85 | 3 | 1 |
| -<br>7.428E+18 | IsMasterProtein | A0A8C4ZPT4  | UV excision repair protein RAD23 OS=Gadus morhua OX=8049 GN=rad23aa PE=3 SV=1                                | 18 | 3 | 4 | 3 | 349  | 37.5  | 4.84 | 13.75 | 3 | 1 |
| -<br>7.291E+18 | IsMasterProtein | A0A8C4ZX28  | Protein disulfide-isomerase A6 OS=Gadus morhua OX=8049 GN=pdia6 PE=3 SV=1                                    | 12 | 4 | 5 | 4 | 440  | 47.5  | 5.27 | 13.71 | 4 | 1 |
| -<br>7.702E+18 | IsMasterProtein | A0A8C5AAZ7  | Uncharacterized protein OS=Gadus morhua OX=8049 PE=4 SV=1                                                    | 3  | 3 | 5 | 2 | 2306 | 250.8 | 6.73 | 13.71 | 3 | 1 |
| -<br>9.129E+17 | IsMasterProtein | G0XNX4      | Peptidyl-prolyl cis-trans isomerase OS=Gadus morhua OX=8049 PE=2 SV=1                                        | 31 | 4 | 5 | 4 | 163  | 17.4  | 8.24 | 13.7  | 4 | 1 |
| -<br>2.526E+18 | IsMasterProtein | A0A8C4Z8Q6  | 60 kDa heat shock protein, mitochondrial OS=Gadus morhua OX=8049 PE=3 SV=1                                   | 10 | 5 | 5 | 5 | 590  | 62.4  | 5.62 | 13.69 | 5 | 1 |
| -<br>7.928E+18 | IsMasterProtein | A0A8C4Z8D3  | Creatine kinase OS=Gadus morhua OX=8049 GN=ckba PE=3 SV=1                                                    | 19 | 5 | 5 | 3 | 377  | 42.3  | 6.77 | 13.57 | 5 | 1 |
| -<br>8.095E+17 | IsMasterProtein | A0A8C5B7B5  | Ubiquitin carboxyl-terminal hydrolase OS=Gadus morhua OX=8049 PE=3 SV=1                                      | 25 | 4 | 5 | 4 | 195  | 21.4  | 6.11 | 13.55 | 4 | 1 |
| 4.6464E+18     | IsMasterProtein | A0A8C5CID7  | Sushi, von Willebrand factor type A, EGF and pentraxin domain containing 1 OS=Gadus morhua OX=8049 PE=4 SV=1 | 2  | 4 | 5 | 4 | 3511 | 375.3 | 6.43 | 13.53 | 4 | 1 |
| -<br>1.611E+18 | IsMasterProtein | A0A8C5CTX5  | Carboxypeptidase Q OS=Gadus morhua OX=8049 GN=cpq PE=4 SV=1                                                  | 13 | 4 | 4 | 4 | 460  | 50.2  | 5.69 | 13.46 | 4 | 1 |
| 2.175E+18      | IsMasterProtein | A0A8C5B529  | Diaphanous-related formin 2 OS=Gadus morhua OX=8049 PE=3 SV=1                                                | 6  | 3 | 5 | 2 | 1079 | 122.3 | 6.24 | 13.45 | 3 | 1 |
| -<br>3.727E+18 | IsMasterProtein | A0A8C4YX64  | UDP-glucose glycoprotein glucosyltransferase 2 OS=Gadus morhua OX=8049 GN=UGGT2 PE=3 SV=1                    | 5  | 5 | 5 | 2 | 1524 | 171.8 | 6.73 | 13.44 | 5 | 1 |
| -<br>8.405E+18 | IsMasterProtein | A0A8C4YU44  | ATP-citrate synthase OS=Gadus morhua OX=8049 GN=LOC115531001 PE=3 SV=1                                       | 6  | 5 | 5 | 3 | 1064 | 116.3 | 7.27 | 13.43 | 5 | 1 |
| 7.9148E+18     | IsMasterProtein | A0A8C4ZDI8  | Carboxypeptidase OS=Gadus morhua OX=8049 PE=3 SV=1                                                           | 15 | 4 | 5 | 4 | 471  | 52.6  | 6.9  | 13.42 | 4 | 1 |
| -<br>3.608E+18 | IsMasterProtein | A0A8C4Z7U2  | Adducin 2 (beta) OS=Gadus morhua OX=8049 GN=add2 PE=3 SV=1                                                   | 7  | 2 | 5 | 2 | 630  | 69.2  | 7.01 | 13.41 | 2 | 1 |
| 1.5946E+17     | IsMasterProtein | A0A8C5BEC2  | Neuropilin 1 OS=Gadus morhua OX=8049 GN=NRP1 PE=3 SV=1                                                       | 6  | 3 | 5 | 2 | 718  | 79.2  | 5.71 | 13.37 | 3 | 1 |
| 4.8745E+18     | IsMasterProtein | A0A8C5CU M8 | Annexin OS=Gadus morhua OX=8049 GN=anxa1a PE=3 SV=1                                                          | 16 | 5 | 5 | 5 | 325  | 36    | 6.24 | 13.37 | 5 | 1 |

|                 |                 |             |                                                                                       |    |   |   |   |      |       |      |       |   |   |
|-----------------|-----------------|-------------|---------------------------------------------------------------------------------------|----|---|---|---|------|-------|------|-------|---|---|
| -<br>4.235E+18  | IsMasterProtein | A0A8C4YV30  | Annexin OS=Gadus morhua OX=8049 GN=anxa5b PE=3 SV=1                                   | 10 | 2 | 4 | 2 | 314  | 34.4  | 5.49 | 13.33 | 2 | 1 |
| -<br>4.879E+18  | IsMasterProtein | A0A8C5AJP0  | Fibroblast growth factor receptor OS=Gadus morhua OX=8049 PE=3 SV=1                   | 10 | 4 | 5 | 3 | 836  | 93.6  | 7.53 | 13.28 | 4 | 1 |
| -<br>7.065E+18  | IsMasterProtein | A0A8C4ZU59  | Junction plakoglobin OS=Gadus morhua OX=8049 PE=3 SV=1                                | 7  | 5 | 5 | 4 | 694  | 76.3  | 6.57 | 13.28 | 5 | 1 |
| -<br>8.96E+18   | IsMasterProtein | A0A8C5A5K3  | Uncharacterized protein OS=Gadus morhua OX=8049 PE=3 SV=1                             | 12 | 2 | 4 | 2 | 285  | 31.3  | 5.01 | 13.26 | 2 | 1 |
| -<br>3.643E+18  | IsMasterProtein | A0A8C5CSD3  | Carboxypeptidase vitellogenic like OS=Gadus morhua OX=8049 PE=3 SV=1                  | 8  | 5 | 5 | 5 | 478  | 54.5  | 6.21 | 13.22 | 5 | 1 |
| -<br>3.6617E+17 | IsMasterProtein | A0A8C5FRB2  | Ankyrin repeat domain 11 OS=Gadus morhua OX=8049 GN=ankrd11 PE=4 SV=1                 | 3  | 5 | 5 | 5 | 2859 | 322.8 | 6.28 | 13.21 | 5 | 1 |
| -<br>9.082E+18  | IsMasterProtein | A0A8C5CW X1 | Pyruvate carboxylase OS=Gadus morhua OX=8049 GN=pc PE=4 SV=1                          | 6  | 5 | 5 | 5 | 1186 | 130   | 6.68 | 13.16 | 5 | 1 |
| -<br>4.6131E+18 | IsMasterProtein | A0A8C5B4I7  | Protein AMBP OS=Gadus morhua OX=8049 GN=LOC115538969 PE=3 SV=1                        | 11 | 4 | 5 | 4 | 380  | 41.7  | 5.49 | 13.16 | 4 | 1 |
| -<br>7.334E+18  | IsMasterProtein | A0A8C5FET6  | 26S proteasome regulatory subunit 7 OS=Gadus morhua OX=8049 GN=PSMC2 PE=3 SV=1        | 15 | 5 | 5 | 5 | 459  | 51.3  | 6.61 | 13.15 | 5 | 1 |
| -<br>4.7849E+18 | IsMasterProtein | A0A8C5CFR2  | Myomesin 2a OS=Gadus morhua OX=8049 GN=myom2a PE=4 SV=1                               | 5  | 4 | 6 | 4 | 1449 | 158.7 | 8.22 | 13.15 | 4 | 1 |
| -<br>6.375E+17  | IsMasterProtein | A0A8C5B2P0  | Pyruvate kinase OS=Gadus morhua OX=8049 PE=3 SV=1                                     | 8  | 4 | 5 | 2 | 473  | 52.6  | 9.26 | 13.14 | 4 | 1 |
| -<br>7.3272E+17 | IsMasterProtein | A0A8C4ZTZ9  | TOX high mobility group box family member 2 OS=Gadus morhua OX=8049 GN=tox2 PE=4 SV=1 | 6  | 2 | 6 | 2 | 549  | 60    | 7.49 | 13.14 | 2 | 1 |
| -<br>4.379E+17  | IsMasterProtein | A0A8C4Z0I9  | Kazrin, periplakin interacting protein b OS=Gadus morhua OX=8049 PE=4 SV=1            | 4  | 2 | 5 | 2 | 773  | 87.9  | 7.39 | 13.09 | 2 | 1 |
| -<br>3.557E+18  | IsMasterProtein | A0A8C5AW73  | Fibrillar collagen NC1 domain-containing protein OS=Gadus morhua OX=8049 PE=4 SV=1    | 4  | 4 | 5 | 4 | 1321 | 136.8 | 7.78 | 13.03 | 4 | 1 |
| -<br>3.5478E+18 | IsMasterProtein | A0A8C4ZY42  | Uncharacterized protein OS=Gadus morhua OX=8049 PE=4 SV=1                             | 18 | 3 | 4 | 3 | 265  | 29.3  | 6.21 | 13.01 | 3 | 1 |
| -<br>7.7804E+17 | IsMasterProtein | A0A8C5BH05  | AIP3 domain-containing protein OS=Gadus morhua OX=8049 PE=4 SV=1                      | 7  | 5 | 5 | 5 | 1220 | 133.6 | 9.2  | 12.99 | 5 | 1 |
| -<br>5.683E+18  | IsMasterProtein | A0A8C5FLQ1  | Transmembrane protein 132E OS=Gadus morhua OX=8049 GN=tmem132e PE=3 SV=1              | 5  | 4 | 4 | 4 | 1123 | 122.1 | 5.24 | 12.99 | 4 | 1 |
| -<br>3.186E+18  | IsMasterProtein | A0A8C5F6D1  | P1, F-box associated domain containing OS=Gadus morhua OX=8049 GN=ncrp1 PE=4 SV=1     | 22 | 3 | 4 | 3 | 209  | 24.1  | 6.1  | 12.99 | 3 | 1 |
| -<br>7.815E+18  | IsMasterProtein | A0A8C5C0Q4  | Lamin B2 OS=Gadus morhua OX=8049 PE=3 SV=1                                            | 7  | 5 | 5 | 5 | 727  | 82    | 8.31 | 12.9  | 5 | 1 |
| -<br>4.727E+18  | IsMasterProtein | A0A8C4ZAM8  | Uncharacterized protein OS=Gadus morhua OX=8049 PE=4 SV=1                             | 7  | 4 | 5 | 4 | 1195 | 130.7 | 6.25 | 12.83 | 4 | 1 |
| -<br>7.0057E+18 | IsMasterProtein | A0A8C5C793  | Nucleophosmin OS=Gadus morhua OX=8049 GN=npmla PE=3 SV=1                              | 15 | 4 | 4 | 4 | 289  | 31.9  | 4.74 | 12.83 | 4 | 1 |
| -<br>3.391E+18  | IsMasterProtein | A0A8C4ZD31  | Biglycan OS=Gadus morhua OX=8049 GN=bgnb PE=3 SV=1                                    | 14 | 4 | 5 | 4 | 371  | 42.4  | 8.27 | 12.75 | 4 | 1 |

|                 |                 |            |                                                                                                                         |    |   |   |   |      |       |      |       |   |   |
|-----------------|-----------------|------------|-------------------------------------------------------------------------------------------------------------------------|----|---|---|---|------|-------|------|-------|---|---|
| -<br>8.741E+18  | IsMasterProtein | A0A8C5AHG1 | Fructose-bisphosphate aldolase OS=Gadus morhua OX=8049 GN=aldocb PE=3 SV=1                                              | 17 | 5 | 5 | 4 | 363  | 39.5  | 5.72 | 12.75 | 5 | 1 |
| -<br>2.926E+18  | IsMasterProtein | A0A8C5C0X4 | Uncharacterized protein OS=Gadus morhua OX=8049 PE=3 SV=1                                                               | 4  | 4 | 4 | 4 | 2454 | 273.2 | 6.6  | 12.74 | 4 | 1 |
| -<br>6.35E+18   | IsMasterProtein | A0A8C5FME8 | Hydroxyacyl-CoA dehydrogenase trifunctional multienzyme complex subunit beta OS=Gadus morhua OX=8049 GN=hadhb PE=3 SV=1 | 10 | 4 | 5 | 4 | 484  | 51.7  | 9.45 | 12.73 | 4 | 1 |
| -<br>4.532E+18  | IsMasterProtein | A0A8C5C5R6 | Zinc finger protein 513a OS=Gadus morhua OX=8049 GN=znf513a PE=4 SV=1                                                   | 10 | 2 | 4 | 2 | 691  | 74    | 7.99 | 12.64 | 2 | 1 |
| -<br>4.8101E+18 | IsMasterProtein | A0A8C5FXX6 | Tyrosine-protein kinase OS=Gadus morhua OX=8049 PE=3 SV=1                                                               | 10 | 3 | 5 | 2 | 474  | 54    | 7.61 | 12.63 | 3 | 1 |
| -<br>2.515E+18  | IsMasterProtein | A0A8C5BZK2 | PTPRF interacting protein alpha 3 OS=Gadus morhua OX=8049 PE=3 SV=1                                                     | 6  | 5 | 5 | 4 | 1167 | 132.1 | 6.11 | 12.62 | 5 | 1 |
| -<br>9.063E+18  | IsMasterProtein | A0A8C5CRA5 | SH3 domain-binding glutamic acid-rich-like protein OS=Gadus morhua OX=8049 GN=SH3BGRL PE=3 SV=1                         | 44 | 3 | 4 | 3 | 115  | 12.7  | 5.07 | 12.59 | 3 | 1 |
| -<br>5.853E+18  | IsMasterProtein | A0A8C5AE28 | Dedicator of cytokinesis 9b OS=Gadus morhua OX=8049 PE=3 SV=1                                                           | 6  | 5 | 5 | 2 | 1953 | 220.8 | 7.88 | 12.58 | 5 | 1 |
| -<br>6.6863E+18 | IsMasterProtein | A0A8C4ZDI5 | Uncharacterized protein OS=Gadus morhua OX=8049 PE=3 SV=1                                                               | 24 | 4 | 5 | 4 | 192  | 21.4  | 6.52 | 12.58 | 4 | 1 |
| -<br>2.8268E+18 | IsMasterProtein | A0A8C5A4C7 | Myosin IXAb OS=Gadus morhua OX=8049 GN=myo9ab PE=3 SV=1                                                                 | 7  | 5 | 5 | 5 | 1589 | 181.2 | 8.79 | 12.55 | 5 | 1 |
| -<br>6.266E+18  | IsMasterProtein | A0A8C4Z9P1 | Pentaxin OS=Gadus morhua OX=8049 GN=LOC115554653 PE=3 SV=1                                                              | 29 | 5 | 6 | 5 | 225  | 25.4  | 5.66 | 12.52 | 5 | 1 |
| -<br>7.397E+18  | IsMasterProtein | A0A8C5F5B8 | Cellular repressor of E1A-stimulated genes 1 OS=Gadus morhua OX=8049 GN=creg1 PE=3 SV=1                                 | 19 | 3 | 4 | 3 | 191  | 21.2  | 6.52 | 12.5  | 3 | 1 |
| -<br>1.17E+18   | IsMasterProtein | A0A8C5CK34 | Adenylyl cyclase-associated protein OS=Gadus morhua OX=8049 GN=cap1 PE=3 SV=1                                           | 13 | 4 | 5 | 4 | 347  | 36.5  | 7.14 | 12.47 | 4 | 1 |
| -<br>5.602E+18  | IsMasterProtein | A0A8C5F8U9 | Rap guanine nucleotide exchange factor (GEF) 6 OS=Gadus morhua OX=8049 GN=rapgef6 PE=3 SV=1                             | 7  | 5 | 5 | 5 | 1555 | 171.7 | 6.54 | 12.44 | 5 | 1 |
| -<br>8.736E+18  | IsMasterProtein | A0A8C5A9Q7 | Supervillin-like OS=Gadus morhua OX=8049 GN=LOC115548687 PE=3 SV=1                                                      | 3  | 3 | 4 | 3 | 1830 | 203.8 | 7.2  | 12.37 | 3 | 1 |
| -<br>7.977E+18  | IsMasterProtein | A0A8C4Z974 | Nucleoside diphosphate kinase OS=Gadus morhua OX=8049 PE=3 SV=1                                                         | 17 | 3 | 4 | 3 | 237  | 26.3  | 9.57 | 12.36 | 3 | 1 |
| -<br>2.278E+18  | IsMasterProtein | A0A8C5B195 | Sushi-repeat containing protein X-linked OS=Gadus morhua OX=8049 GN=srpX PE=4 SV=1                                      | 12 | 5 | 5 | 5 | 471  | 53.1  | 8.4  | 12.33 | 5 | 1 |
| -<br>8.061E+18  | IsMasterProtein | A0A8C4ZCY3 | Receptor protein-tyrosine kinase OS=Gadus morhua OX=8049 PE=3 SV=1                                                      | 7  | 5 | 5 | 5 | 883  | 98.1  | 6.61 | 12.32 | 5 | 1 |
| -<br>5.436E+18  | IsMasterProtein | A0A8C5C8E0 | Heterogeneous nuclear ribonucleoprotein A/B-like OS=Gadus morhua OX=8049 GN=LOC115547029 PE=4 SV=1                      | 10 | 3 | 4 | 3 | 385  | 41.1  | 4.6  | 12.28 | 3 | 1 |
| -<br>6.336E+18  | IsMasterProtein | A0A8C5A9S9 | Hypoxia up-regulated 1 OS=Gadus morhua OX=8049 GN=hyou1 PE=3 SV=1                                                       | 6  | 5 | 5 | 5 | 964  | 107.9 | 5.26 | 12.23 | 5 | 1 |
| -<br>8.7182E+18 | IsMasterProtein | A0A8C4Z3Q5 | Charged multivesicular body protein 4b-like OS=Gadus morhua OX=8049 GN=LOC115557320 PE=3 SV=1                           | 13 | 4 | 5 | 4 | 425  | 46.9  | 6.4  | 12.21 | 4 | 1 |

|                 |                 |            |                                                                                                        |    |   |   |   |      |       |      |       |   |   |
|-----------------|-----------------|------------|--------------------------------------------------------------------------------------------------------|----|---|---|---|------|-------|------|-------|---|---|
| -<br>7.059E+18  | IsMasterProtein | A0A8C4Z2U8 | Radial spoke head 10 homolog B OS=Gadus morhua OX=8049 GN=rsph10b PE=4 SV=1                            | 7  | 4 | 5 | 4 | 875  | 98.7  | 6.6  | 12.21 | 4 | 1 |
| -<br>8.68E+18   | IsMasterProtein | A0A8C5AZW4 | Phosphoglycerate kinase OS=Gadus morhua OX=8049 PE=3 SV=1                                              | 12 | 5 | 5 | 5 | 515  | 55.2  | 8.98 | 12.21 | 5 | 1 |
| -<br>7.744E+18  | IsMasterProtein | A0A8C5D0T5 | MAM domain containing glycosylphosphatidylinositol anchor 1 OS=Gadus morhua OX=8049 GN=mdga1 PE=4 SV=1 | 6  | 4 | 4 | 4 | 976  | 108.9 | 8.9  | 12.15 | 4 | 1 |
| -<br>2.649E+18  | IsMasterProtein | A0A8C4Z224 | Myosin-10-like OS=Gadus morhua OX=8049 GN=LOC115560902 PE=3 SV=1                                       | 3  | 5 | 5 | 2 | 2003 | 231.1 | 5.64 | 12.13 | 5 | 1 |
| -<br>3.158E+18  | IsMasterProtein | A0A8C5B2W2 | Uncharacterized protein OS=Gadus morhua OX=8049 PE=4 SV=1                                              | 26 | 5 | 5 | 5 | 219  | 24    | 6    | 12.1  | 5 | 1 |
| -<br>1.7778E+18 | IsMasterProtein | A0A8C5BAZ5 | Solute carrier family 12 member 2 OS=Gadus morhua OX=8049 PE=3 SV=1                                    | 6  | 5 | 5 | 5 | 1163 | 126.9 | 6.19 | 12.09 | 5 | 1 |
| -<br>6.542E+18  | IsMasterProtein | A0A8C5AAL8 | Zinc finger protein 687b OS=Gadus morhua OX=8049 GN=znf687b PE=3 SV=1                                  | 4  | 5 | 5 | 5 | 1462 | 152.4 | 6.98 | 12.09 | 5 | 1 |
| -<br>2.634E+18  | IsMasterProtein | A0A8C5FP57 | Neurobeachin-like 1 OS=Gadus morhua OX=8049 GN=nbeal1 PE=4 SV=1                                        | 3  | 3 | 4 | 3 | 2807 | 310.9 | 6.67 | 12.05 | 3 | 1 |
| -<br>8.014E+18  | IsMasterProtein | A0A8C5AAW2 | PACT_coil_coil domain-containing protein OS=Gadus morhua OX=8049 PE=4 SV=1                             | 3  | 5 | 5 | 5 | 2863 | 321.1 | 5.06 | 12.05 | 5 | 1 |
| -<br>5.31E+18   | IsMasterProtein | A0A8C4ZML9 | Annexin OS=Gadus morhua OX=8049 GN=anxa13 PE=3 SV=1                                                    | 17 | 3 | 4 | 3 | 316  | 35.6  | 4.63 | 12.02 | 3 | 1 |
| -<br>8.7051E+18 | IsMasterProtein | A0A8C5A9Q0 | SIN3 transcription regulator family member B OS=Gadus morhua OX=8049 GN=sin3b PE=4 SV=1                | 3  | 2 | 4 | 2 | 1189 | 135   | 6.58 | 11.98 | 2 | 1 |
| -<br>3.335E+18  | IsMasterProtein | A0A8C5BYW3 | Quinoid dihydropteridine reductase a OS=Gadus morhua OX=8049 PE=4 SV=1                                 | 17 | 4 | 4 | 4 | 380  | 40.1  | 7.46 | 11.97 | 4 | 1 |
| -<br>8.3E+18    | IsMasterProtein | A0A8C5BLC7 | Poly(rC) binding protein 2 OS=Gadus morhua OX=8049 GN=PCBP2 PE=4 SV=1                                  | 20 | 4 | 4 | 4 | 365  | 38.1  | 9.44 | 11.96 | 4 | 1 |
| -<br>6.765E+18  | IsMasterProtein | A0A8C5A5C7 | Ryanodine receptor 1 OS=Gadus morhua OX=8049 PE=4 SV=1                                                 | 1  | 4 | 5 | 4 | 4918 | 557.1 | 5.72 | 11.93 | 4 | 1 |
| -<br>4.372E+18  | IsMasterProtein | A0A8C4ZM46 | Basal cell adhesion molecule (Lutheran blood group) OS=Gadus morhua OX=8049 GN=bcam PE=4 SV=1          | 9  | 3 | 4 | 3 | 548  | 58.4  | 5.16 | 11.93 | 3 | 1 |
| -<br>1.0203E+18 | IsMasterProtein | A0A8C4ZM34 | Aminopeptidase OS=Gadus morhua OX=8049 PE=3 SV=1                                                       | 6  | 4 | 4 | 4 | 954  | 107.9 | 6.76 | 11.91 | 4 | 1 |
| -<br>9.6208E+17 | IsMasterProtein | A0A8C4Z4D5 | Protein phosphatase, Mg2+/Mn2+ dependent, 1Bb OS=Gadus morhua OX=8049 GN=ppm1bb PE=3 SV=1              | 12 | 5 | 5 | 5 | 506  | 53.5  | 5.01 | 11.87 | 5 | 1 |
| -<br>2.786E+18  | IsMasterProtein | A0A8C5AQW9 | Uncharacterized protein OS=Gadus morhua OX=8049 PE=4 SV=1                                              | 9  | 4 | 4 | 4 | 699  | 74.9  | 5.49 | 11.87 | 4 | 1 |
| -<br>4.013E+18  | IsMasterProtein | A0A8C4Z3N5 | Chromosome 21 C6orf58 homolog OS=Gadus morhua OX=8049 GN=c21h6orf58 PE=3 SV=1                          | 11 | 3 | 4 | 3 | 359  | 39.3  | 5.21 | 11.86 | 3 | 1 |
| -<br>2.874E+18  | IsMasterProtein | A0A8C4ZLX7 | Guanylate cyclase OS=Gadus morhua OX=8049 GN=LOC115529988 PE=3 SV=1                                    | 7  | 4 | 4 | 3 | 1053 | 116.9 | 7.11 | 11.86 | 4 | 1 |
| -<br>8.629E+18  | IsMasterProtein | A0A8C5D2R8 | Serpin peptidase inhibitor, clade B (ovalbumin), member 1, like 3 OS=Gadus morhua OX=8049 PE=3 SV=1    | 13 | 4 | 4 | 2 | 390  | 44.1  | 5.43 | 11.81 | 4 | 1 |

|            |                  |            |                                                                                                           |    |   |   |   |      |       |       |       |   |   |
|------------|------------------|------------|-----------------------------------------------------------------------------------------------------------|----|---|---|---|------|-------|-------|-------|---|---|
| 4.1183E+18 | IsMasterProt ein | A0A8C4Z526 | Retinol binding protein 3 OS=Gadus morhua OX=8049 GN=rbp3 PE=4 SV=1                                       | 6  | 3 | 5 | 3 | 617  | 66.9  | 5.27  | 11.75 | 3 | 1 |
| 9.143E+18  | IsMasterProt ein | A0A8C4ZLV8 | Nuclear VCP like OS=Gadus morhua OX=8049 GN=si:ch211-195b21.5 PE=4 SV=1                                   | 12 | 4 | 4 | 4 | 782  | 85.2  | 6.76  | 11.74 | 4 | 1 |
| 8.442E+18  | IsMasterProt ein | A0A8C5CR37 | Vesicle-fusing ATPase OS=Gadus morhua OX=8049 GN=nsfa PE=3 SV=1                                           | 9  | 4 | 4 | 4 | 768  | 84.6  | 6.81  | 11.71 | 4 | 1 |
| 7.0637E+17 | IsMasterProt ein | A0A8C5CXL4 | Centrosomal protein 89 OS=Gadus morhua OX=8049 GN=cep89 PE=4 SV=1                                         | 4  | 2 | 5 | 2 | 845  | 94.5  | 6     | 11.63 | 2 | 1 |
| 6.2726E+18 | IsMasterProt ein | A0A8C4ZA68 | Secretogranin-3 OS=Gadus morhua OX=8049 GN=scg3 PE=4 SV=1                                                 | 12 | 4 | 4 | 4 | 504  | 56.2  | 4.49  | 11.55 | 4 | 1 |
| 2.5015E+18 | IsMasterProt ein | A0A8C5F524 | 40S ribosomal protein S9 OS=Gadus morhua OX=8049 GN=rps9 PE=3 SV=1                                        | 23 | 5 | 5 | 5 | 194  | 22.5  | 10.58 | 11.52 | 5 | 1 |
| 8.714E+18  | IsMasterProt ein | A0A8C4ZLA9 | WD repeat domain 7 OS=Gadus morhua OX=8049 GN=WDR7 PE=4 SV=1                                              | 2  | 4 | 5 | 4 | 1522 | 166.3 | 6.65  | 11.52 | 4 | 1 |
| 1.787E+18  | IsMasterProt ein | A0A8C5CND6 | Protein-arginine deiminase OS=Gadus morhua OX=8049 GN=padi2 PE=3 SV=1                                     | 7  | 4 | 4 | 4 | 671  | 75.5  | 5.38  | 11.48 | 4 | 1 |
| 2.8803E+18 | IsMasterProt ein | A0A8C4Z3P8 | Transcriptional activator protein Pur-beta OS=Gadus morhua OX=8049 GN=LOC115546065 PE=3 SV=1              | 19 | 4 | 4 | 2 | 307  | 33.4  | 5.67  | 11.48 | 4 | 1 |
| 7.395E+18  | IsMasterProt ein | A0A8C5BNH7 | 60S ribosomal protein L30 OS=Gadus morhua OX=8049 GN=rpl30 PE=3 SV=1                                      | 35 | 4 | 4 | 4 | 127  | 14.4  | 9.64  | 11.48 | 4 | 1 |
| 1.814E+18  | IsMasterProt ein | A0A8C5BPK8 | Centrosomal protein 290 OS=Gadus morhua OX=8049 PE=4 SV=1                                                 | 3  | 4 | 5 | 4 | 2194 | 251.2 | 8.12  | 11.48 | 4 | 1 |
| 8.177E+18  | IsMasterProt ein | A0A8C5A8E2 | Golgi apparatus protein 1 OS=Gadus morhua OX=8049 PE=4 SV=1                                               | 4  | 3 | 4 | 2 | 1100 | 126.1 | 7.42  | 11.46 | 3 | 1 |
| 8.381E+18  | IsMasterProt ein | A0A8C5BEM7 | Tyrosine-protein kinase OS=Gadus morhua OX=8049 GN=abl2 PE=3 SV=1                                         | 8  | 4 | 4 | 4 | 1179 | 126.6 | 8.46  | 11.42 | 4 | 1 |
| 7.536E+18  | IsMasterProt ein | A0A8C4Z3D2 | Protein C (inactivator of coagulation factors Va and VIIIa), a OS=Gadus morhua OX=8049 GN=proca PE=4 SV=1 | 9  | 4 | 4 | 4 | 444  | 49.1  | 5.77  | 11.4  | 4 | 1 |
| 1.6171E+18 | IsMasterProt ein | A0A8C4Z8U6 | Leukocyte elastase inhibitor-like OS=Gadus morhua OX=8049 GN=LOC115537475 PE=3 SV=1                       | 14 | 4 | 4 | 2 | 375  | 42.4  | 5.99  | 11.35 | 4 | 1 |
| 3.7334E+18 | IsMasterProt ein | A0A8C5ACG3 | Coiled-coil domain containing 30 OS=Gadus morhua OX=8049 GN=ccdc30 PE=4 SV=1                              | 6  | 4 | 4 | 4 | 1244 | 142   | 5.95  | 11.3  | 4 | 1 |
| 8.06E+17   | IsMasterProt ein | A0A8C5BM74 | Nipped-B protein OS=Gadus morhua OX=8049 PE=3 SV=1                                                        | 3  | 4 | 4 | 4 | 1661 | 189.2 | 7.72  | 11.3  | 4 | 1 |
| 6.324E+18  | IsMasterProt ein | A0A8C5FP53 | Ciliary rootlet coiled-coil, rootletin OS=Gadus morhua OX=8049 GN=CROCC PE=4 SV=1                         | 3  | 5 | 5 | 5 | 1695 | 190.7 | 7.17  | 11.24 | 5 | 1 |
| 4.231E+18  | IsMasterProt ein | A0A8C5BDX2 | Transmembrane protein 214 OS=Gadus morhua OX=8049 GN=tmem214 PE=3 SV=1                                    | 16 | 4 | 4 | 4 | 441  | 49.4  | 9.33  | 11.21 | 4 | 1 |
| 1.114E+17  | IsMasterProt ein | A0A8C5CS77 | H15 domain-containing protein OS=Gadus morhua OX=8049 PE=3 SV=1                                           | 13 | 4 | 4 | 4 | 225  | 23    | 11.06 | 11.2  | 4 | 1 |
| 3.015E+18  | IsMasterProt ein | A0A8C5CD63 | Protein SOGA3-like OS=Gadus morhua OX=8049 GN=LOC115553619 PE=4 SV=1                                      | 5  | 3 | 4 | 3 | 1188 | 126   | 9.57  | 11.19 | 3 | 1 |
| 7.758E+18  | IsMasterProt ein | A0A8C4ZDZ9 | Actin-related protein 2/3 complex subunit 5 OS=Gadus morhua OX=8049 GN=arpc5b PE=3 SV=1                   | 31 | 2 | 3 | 2 | 150  | 16.7  | 5.26  | 11.19 | 2 | 1 |



|                |                 |            |                                                                                                                      |    |   |   |   |      |       |       |       |   |   |
|----------------|-----------------|------------|----------------------------------------------------------------------------------------------------------------------|----|---|---|---|------|-------|-------|-------|---|---|
| -<br>8.933E+18 | IsMasterProtein | A0A8C5CNM3 | Glutamate receptor OS=Gadus morhua OX=8049 PE=3 SV=1                                                                 | 4  | 2 | 4 | 2 | 900  | 100.5 | 8.51  | 11.18 | 2 | 1 |
| 1.8478E+18     | IsMasterProtein | A0A8C5FIH9 | Calpain-3 OS=Gadus morhua OX=8049 GN=capn3b PE=3 SV=1                                                                | 6  | 2 | 4 | 2 | 717  | 83.1  | 7.47  | 11.18 | 2 | 1 |
| 1.7809E+18     | IsMasterProtein | A0A8C5B957 | Amyloid beta (A4) precursor-like protein 2 OS=Gadus morhua OX=8049 GN=aplp2 PE=3 SV=1                                | 6  | 3 | 3 | 3 | 761  | 86.5  | 4.74  | 11.17 | 3 | 1 |
| -<br>6.566E+18 | IsMasterProtein | A0A8C5FBU2 | Furry homolog a (Drosophila) OS=Gadus morhua OX=8049 PE=4 SV=1                                                       | 2  | 3 | 4 | 3 | 2939 | 327   | 6.43  | 11.14 | 3 | 1 |
| -<br>2.755E+18 | IsMasterProtein | A0A8C5F9A0 | Rabenosyn, RAB effector OS=Gadus morhua OX=8049 GN=rbsn PE=4 SV=1                                                    | 7  | 2 | 4 | 2 | 544  | 62.2  | 7.9   | 11.13 | 2 | 1 |
| -<br>8.687E+18 | IsMasterProtein | A0A8C5F477 | Rab GDP dissociation inhibitor OS=Gadus morhua OX=8049 GN=GDI2 PE=3 SV=1                                             | 5  | 2 | 4 | 2 | 439  | 49.6  | 5.71  | 11.12 | 2 | 1 |
| -<br>3.615E+18 | IsMasterProtein | A0A8C5FAD7 | Ribosome biogenesis regulatory protein OS=Gadus morhua OX=8049 GN=rrs1 PE=3 SV=1                                     | 10 | 2 | 4 | 2 | 401  | 43.2  | 10.59 | 11.11 | 2 | 1 |
| -<br>3.131E+18 | IsMasterProtein | A0A8C5C169 | Cytosolic non-specific dipeptidase-like OS=Gadus morhua OX=8049 GN=LOC115536314 PE=3 SV=1                            | 9  | 4 | 4 | 4 | 534  | 59.7  | 5.53  | 11.09 | 4 | 1 |
| -<br>5.681E+18 | IsMasterProtein | A0A8C5FKG2 | Casein kinase II subunit beta OS=Gadus morhua OX=8049 GN=csnk2b PE=3 SV=1                                            | 27 | 4 | 4 | 4 | 225  | 25.8  | 5.43  | 11.07 | 4 | 1 |
| -<br>8.038E+18 | IsMasterProtein | A0A8C5A097 | H-2 class I histocompatibility antigen, Q9 alpha chain-like OS=Gadus morhua OX=8049 GN=LOC115529275 PE=3 SV=1        | 19 | 4 | 4 | 2 | 373  | 42.6  | 5.5   | 11.05 | 4 | 1 |
| -<br>4.204E+18 | IsMasterProtein | A0A8C4ZAK9 | HMG box domain containing 3 OS=Gadus morhua OX=8049 GN=HMGXB3 PE=4 SV=1                                              | 7  | 4 | 5 | 4 | 1323 | 142.1 | 6.35  | 11.03 | 4 | 1 |
| 1.895E+17      | IsMasterProtein | A0A8C4ZAZ7 | Fib_alpha domain-containing protein OS=Gadus morhua OX=8049 PE=4 SV=1                                                | 8  | 4 | 4 | 4 | 467  | 49    | 7.09  | 10.99 | 4 | 1 |
| 7.0175E+18     | IsMasterProtein | A0A8C4Z545 | Structural maintenance of chromosomes flexible hinge domain containing 1 OS=Gadus morhua OX=8049 GN=smchd1 PE=4 SV=1 | 2  | 4 | 4 | 4 | 1976 | 220.9 | 6.48  | 10.98 | 4 | 1 |
| 2.011E+17      | IsMasterProtein | A0A8C5F9U9 | Cathepsin L.1 OS=Gadus morhua OX=8049 GN=ctsl.1 PE=3 SV=1                                                            | 16 | 4 | 4 | 4 | 334  | 36.7  | 5.15  | 10.98 | 4 | 1 |
| -<br>7.779E+18 | IsMasterProtein | A0A8C5CHT3 | HEAT repeat containing 5B OS=Gadus morhua OX=8049 GN=HEATR5B PE=3 SV=1                                               | 4  | 4 | 4 | 4 | 2115 | 227.9 | 6.99  | 10.93 | 4 | 1 |
| -<br>8.662E+18 | IsMasterProtein | A0A8C5AMP9 | Calcium/calmodulin-dependent protein kinase OS=Gadus morhua OX=8049 GN=LOC115540711 PE=3 SV=1                        | 8  | 3 | 4 | 2 | 542  | 60.9  | 7.56  | 10.93 | 3 | 1 |
| -<br>6.695E+18 | IsMasterProtein | A0A8C5C4P5 | Vimentin like OS=Gadus morhua OX=8049 PE=3 SV=1                                                                      | 11 | 4 | 4 | 2 | 455  | 52.8  | 5.33  | 10.87 | 4 | 1 |
| -<br>9.091E+18 | IsMasterProtein | A0A8C5BR64 | Gelsolin OS=Gadus morhua OX=8049 PE=4 SV=1                                                                           | 11 | 4 | 5 | 4 | 710  | 78.6  | 5.68  | 10.87 | 4 | 1 |
| -<br>7.959E+18 | IsMasterProtein | A0A8C4ZZ30 | Peptidylprolyl isomerase OS=Gadus morhua OX=8049 PE=4 SV=1                                                           | 33 | 4 | 4 | 4 | 116  | 12.7  | 9.07  | 10.87 | 4 | 1 |
| -<br>8.941E+18 | IsMasterProtein | A0A8C5FG66 | Core histone macro-H2A OS=Gadus morhua OX=8049 GN=LOC115559527 PE=4 SV=1                                             | 13 | 4 | 4 | 4 | 363  | 39.3  | 9.76  | 10.86 | 4 | 1 |
| 6.3798E+18     | IsMasterProtein | A0A8C4Z702 | Peroxiredoxin-1 OS=Gadus morhua OX=8049 GN=prdx2 PE=3 SV=1                                                           | 22 | 4 | 4 | 4 | 197  | 21.7  | 6.34  | 10.86 | 4 | 1 |

|            |                 |            |                                                                                                       |    |   |   |   |      |       |       |       |   |   |
|------------|-----------------|------------|-------------------------------------------------------------------------------------------------------|----|---|---|---|------|-------|-------|-------|---|---|
| 8.1662E+18 | IsMasterProtein | A0A8C5F6H0 | Uncharacterized protein OS=Gadus morhua OX=8049 PE=4 SV=1                                             | 4  | 3 | 4 | 3 | 1954 | 214.2 | 6.09  | 10.86 | 3 | 1 |
| 7.688E+18  | IsMasterProtein | A0A8C4ZW9  | EF-hand calcium binding domain 7 OS=Gadus morhua OX=8049 GN=efcab7 PE=3 SV=1                          | 5  | 2 | 4 | 2 | 564  | 61.2  | 6.19  | 10.85 | 2 | 1 |
| 7.855E+18  | IsMasterProtein | A0A8C5B2L7 | Ryanodine receptor 1b (skeletal) OS=Gadus morhua OX=8049 PE=4 SV=1                                    | 2  | 4 | 4 | 4 | 4960 | 561.1 | 5.26  | 10.83 | 4 | 1 |
| 5.8286E+18 | IsMasterProtein | O98274     | MHC class I (Fragment) OS=Gadus morhua OX=8049 GN=gamr-UA-c32 PE=2 SV=1                               | 19 | 4 | 4 | 2 | 288  | 32.5  | 6.46  | 10.82 | 4 | 1 |
| 8.903E+18  | IsMasterProtein | A0A8C5F8D0 | Thrombospondin type 1 domain containing 4 OS=Gadus morhua OX=8049 GN=THSD4 PE=4 SV=1                  | 8  | 4 | 4 | 4 | 755  | 82.8  | 6.37  | 10.82 | 4 | 1 |
| 3.269E+18  | IsMasterProtein | A0A8C4Z9G3 | Mitogen-activated protein kinase OS=Gadus morhua OX=8049 GN=mapk3 PE=3 SV=1                           | 13 | 3 | 4 | 3 | 355  | 40.9  | 6.74  | 10.81 | 3 | 1 |
| 2.23E+18   | IsMasterProtein | A0A8C5AJ35 | Euchromatic histone-lysine N-methyltransferase 1a OS=Gadus morhua OX=8049 GN=ehmt1a PE=4 SV=1         | 8  | 3 | 4 | 3 | 1045 | 114.3 | 6.96  | 10.77 | 3 | 1 |
| 7.385E+18  | IsMasterProtein | A0A8C5CP87 | Uncharacterized protein OS=Gadus morhua OX=8049 GN=st6galnac6 PE=3 SV=1                               | 6  | 2 | 4 | 2 | 309  | 34.9  | 10.1  | 10.75 | 2 | 1 |
| 5.147E+18  | IsMasterProtein | A0A8C4ZUL7 | Uncharacterized protein OS=Gadus morhua OX=8049 PE=4 SV=1                                             | 4  | 2 | 4 | 2 | 1110 | 121.9 | 8.51  | 10.75 | 2 | 1 |
| 2.677E+18  | IsMasterProtein | A0A8C5CUE4 | Eukaryotic translation initiation factor 3 subunit D OS=Gadus morhua OX=8049 GN=eif3d PE=3 SV=1       | 7  | 3 | 4 | 3 | 586  | 67.7  | 6.68  | 10.74 | 3 | 1 |
| 6.481E+17  | IsMasterProtein | A0A8C5CU68 | Voltage-dependent N-type calcium channel subunit alpha OS=Gadus morhua OX=8049 PE=3 SV=1              | 3  | 4 | 5 | 4 | 2302 | 255.6 | 7.9   | 10.74 | 4 | 1 |
| 3.5743E+18 | IsMasterProtein | A0A8C5C9I3 | Phosphatidylinositol-4,5-bisphosphate 3-kinase OS=Gadus morhua OX=8049 GN=pik3cg PE=3 SV=1            | 9  | 4 | 4 | 4 | 1145 | 129.6 | 6.9   | 10.74 | 4 | 1 |
| 3.3731E+18 | IsMasterProtein | A0A8C4ZRJ1 | Ral GTPase activating protein catalytic subunit alpha 2 OS=Gadus morhua OX=8049 GN=ralgapa2 PE=4 SV=1 | 4  | 4 | 4 | 4 | 1939 | 216.2 | 6.93  | 10.74 | 4 | 1 |
| 9.054E+18  | IsMasterProtein | A0A8C4ZYD4 | Nuclear receptor corepressor 1 OS=Gadus morhua OX=8049 PE=3 SV=1                                      | 4  | 4 | 4 | 4 | 2226 | 245.2 | 8.62  | 10.73 | 4 | 1 |
| 5.199E+18  | IsMasterProtein | A0A8C4ZAA7 | Histone H2A OS=Gadus morhua OX=8049 GN=LOC115529517 PE=3 SV=1                                         | 31 | 4 | 4 | 3 | 128  | 13.6  | 10.58 | 10.66 | 4 | 1 |
| 9.214E+18  | IsMasterProtein | A0A8C4Z0W1 | Endonuclease OS=Gadus morhua OX=8049 GN=endog PE=3 SV=1                                               | 10 | 2 | 4 | 2 | 314  | 34.7  | 9.19  | 10.66 | 2 | 1 |
| 8.7243E+18 | IsMasterProtein | A0A8C5BPJ8 | Uncharacterized protein OS=Gadus morhua OX=8049 PE=4 SV=1                                             | 2  | 4 | 4 | 4 | 3725 | 413.7 | 4.91  | 10.66 | 4 | 1 |
| 5.2814E+18 | IsMasterProtein | A0A8C5AXK5 | TBC1 domain family, member 10Aa OS=Gadus morhua OX=8049 GN=tbc1d10aa PE=4 SV=1                        | 6  | 2 | 4 | 2 | 543  | 61.6  | 8.81  | 10.65 | 2 | 1 |
| 4.4983E+17 | IsMasterProtein | A0A8C4YVX7 | RNAse_Pc domain-containing protein OS=Gadus morhua OX=8049 PE=3 SV=1                                  | 34 | 4 | 4 | 4 | 129  | 15    | 8.03  | 10.64 | 4 | 1 |
| 4.184E+18  | IsMasterProtein | A0A8C5AYV6 | Eukaryotic translation initiation factor 5A-1-like OS=Gadus morhua OX=8049 GN=rpl2211 PE=3 SV=1       | 15 | 3 | 4 | 2 | 261  | 29.8  | 8.43  | 10.61 | 3 | 1 |
| 1.479E+18  | IsMasterProtein | A0A8C4ZQY7 | Nuclear receptor coactivator 3 OS=Gadus morhua OX=8049 PE=3 SV=1                                      | 6  | 4 | 4 | 4 | 1451 | 152.9 | 7.17  | 10.6  | 4 | 1 |
| 4.1803E+18 | IsMasterProtein | P52865     | 60S ribosomal protein L22 (Fragment) OS=Gadus morhua OX=8049 GN=rpl22 PE=2 SV=2                       | 17 | 3 | 4 | 2 | 125  | 14.5  | 9.58  | 10.56 | 3 | 1 |

|                |                 |             |                                                                                             |    |   |   |   |      |       |       |       |   |   |
|----------------|-----------------|-------------|---------------------------------------------------------------------------------------------|----|---|---|---|------|-------|-------|-------|---|---|
| -<br>6.68E+18  | IsMasterProtein | A0A8C5FNC0  | Isocitrate dehydrogenase [NADP] OS=Gadus morhua OX=8049 GN=idh2 PE=3 SV=1                   | 12 | 4 | 4 | 2 | 450  | 50.9  | 6.54  | 10.54 | 4 | 1 |
| 2.944E+18      | IsMasterProtein | A0A8C4ZS69  | RAB10, member RAS oncogene family OS=Gadus morhua OX=8049 GN=rab10 PE=4 SV=1                | 24 | 4 | 4 | 2 | 201  | 22.7  | 8.38  | 10.54 | 4 | 1 |
| -<br>7.451E+18 | IsMasterProtein | A0A8C5CL13  | RB1-inducible coiled-coil 1 OS=Gadus morhua OX=8049 PE=4 SV=1                               | 4  | 4 | 4 | 4 | 1575 | 177.1 | 5.34  | 10.53 | 4 | 1 |
| -<br>2.245E+18 | IsMasterProtein | A0A8C4Z954  | Extracellular matrix protein 1b OS=Gadus morhua OX=8049 PE=4 SV=1                           | 12 | 4 | 4 | 4 | 460  | 51.8  | 8.62  | 10.52 | 4 | 1 |
| -<br>5.429E+18 | IsMasterProtein | A0A8C5BHJ6  | Ubiquitin protein ligase E3 component n-recogin 4 OS=Gadus morhua OX=8049 GN=ubr4 PE=3 SV=1 | 1  | 3 | 6 | 3 | 5172 | 571.2 | 6.07  | 10.51 | 3 | 1 |
| 1.226E+18      | IsMasterProtein | A0A8C5BK54  | Proteasome subunit alpha type OS=Gadus morhua OX=8049 GN=psma5 PE=3 SV=1                    | 20 | 3 | 3 | 3 | 241  | 26.4  | 4.82  | 10.5  | 3 | 1 |
| 8.083E+18      | IsMasterProtein | A0A8C5A6A4  | HIVEP zinc finger 2a OS=Gadus morhua OX=8049 GN=hivep2a PE=4 SV=1                           | 2  | 2 | 4 | 2 | 2508 | 266.7 | 7.34  | 10.49 | 2 | 1 |
| -<br>4.65E+18  | IsMasterProtein | A0A8C4YW X4 | Protein transport protein SEC23 OS=Gadus morhua OX=8049 PE=3 SV=1                           | 7  | 4 | 4 | 4 | 766  | 86.2  | 6.86  | 10.49 | 4 | 1 |
| 8.599E+18      | IsMasterProtein | A0A8C5AK98  | Collagen triple helix repeat containing 1 OS=Gadus morhua OX=8049 GN=CTHRC1 PE=4 SV=1       | 20 | 3 | 4 | 3 | 158  | 17.7  | 6.9   | 10.48 | 3 | 1 |
| 8.173E+18      | IsMasterProtein | A0A8C5BCH7  | NIMA related kinase 1 OS=Gadus morhua OX=8049 GN=NEK1 PE=4 SV=1                             | 3  | 2 | 4 | 2 | 1207 | 133.2 | 6.28  | 10.47 | 2 | 1 |
| -<br>6.597E+18 | IsMasterProtein | A0A8C5FK W2 | Rho GTPase activating protein 45b OS=Gadus morhua OX=8049 GN=arhgap45b PE=4 SV=1            | 3  | 2 | 4 | 2 | 1229 | 134.9 | 5.53  | 10.46 | 2 | 1 |
| 5.392E+18      | IsMasterProtein | A0A8C5BT07  | 40S ribosomal protein S18 OS=Gadus morhua OX=8049 GN=rps18 PE=3 SV=1                        | 24 | 4 | 4 | 4 | 152  | 17.8  | 10.77 | 10.46 | 4 | 1 |
| 1.584E+18      | IsMasterProtein | A0A8C4ZM24  | ATP/GTP binding protein-like 2 OS=Gadus morhua OX=8049 GN=agbl2 PE=3 SV=1                   | 8  | 3 | 4 | 3 | 940  | 107   | 9.28  | 10.45 | 3 | 1 |
| 5.871E+18      | IsMasterProtein | A0A8C5D1I6  | Inhibin subunit beta B OS=Gadus morhua OX=8049 GN=inhibb PE=3 SV=1                          | 7  | 2 | 3 | 2 | 410  | 44.8  | 7.65  | 10.42 | 2 | 1 |
| -<br>9.084E+18 | IsMasterProtein | A0A8C5BSQ7  | Kelch-like family member 6 OS=Gadus morhua OX=8049 GN=klhl6 PE=4 SV=1                       | 13 | 4 | 4 | 4 | 614  | 67.6  | 6.04  | 10.41 | 4 | 1 |
| -<br>1.636E+18 | IsMasterProtein | A0A8C5F9N4  | Transgelin OS=Gadus morhua OX=8049 GN=LOC115547387 PE=3 SV=1                                | 21 | 4 | 4 | 4 | 201  | 22.1  | 8.22  | 10.4  | 4 | 1 |
| -<br>3.626E+18 | IsMasterProtein | A0A8C5FRM1  | Fibroblast growth factor receptor OS=Gadus morhua OX=8049 PE=3 SV=1                         | 6  | 3 | 4 | 2 | 784  | 87.5  | 6.87  | 10.39 | 3 | 1 |
| -<br>5.346E+18 | IsMasterProtein | A0A8C4ZEK1  | Neurofilament, light polypeptide b OS=Gadus morhua OX=8049 GN=neflb PE=3 SV=1               | 5  | 4 | 4 | 3 | 642  | 71.4  | 4.36  | 10.39 | 4 | 1 |
| -<br>7.733E+18 | IsMasterProtein | A0A8C5ADB4  | LisH domain-containing protein OS=Gadus morhua OX=8049 PE=3 SV=1                            | 12 | 3 | 4 | 3 | 500  | 54.8  | 6.64  | 10.38 | 3 | 1 |
| -<br>7.474E+18 | IsMasterProtein | A0A8C4Z936  | Serine and arginine rich splicing factor 9 OS=Gadus morhua OX=8049 GN=srsf9 PE=4 SV=1       | 23 | 4 | 4 | 4 | 251  | 28.7  | 9.73  | 10.36 | 4 | 1 |
| -<br>2.427E+18 | IsMasterProtein | A0A8C5BC61  | Ryanodine receptor 3 OS=Gadus morhua OX=8049 PE=4 SV=1                                      | 2  | 4 | 4 | 4 | 4824 | 543.7 | 5.71  | 10.35 | 4 | 1 |
| -<br>1.176E+17 | IsMasterProtein | A0A8C5BLX2  | Ribonuclease H OS=Gadus morhua OX=8049 PE=3 SV=1                                            | 5  | 4 | 4 | 4 | 1744 | 195.7 | 8.41  | 10.35 | 4 | 1 |

|                |                 |             |                                                                                                     |    |   |   |   |      |       |       |       |   |   |
|----------------|-----------------|-------------|-----------------------------------------------------------------------------------------------------|----|---|---|---|------|-------|-------|-------|---|---|
| 5.7712E+17     | IsMasterProtein | A0A8C4YVF1  | Galectin OS=Gadus morhua OX=8049 PE=4 SV=1                                                          | 10 | 3 | 4 | 3 | 341  | 34.2  | 5.06  | 10.35 | 3 | 1 |
| 8.4399E+17     | IsMasterProtein | Q95I60      | MHC class Ia antigen (Fragment) OS=Gadus morhua OX=8049 PE=2 SV=1                                   | 13 | 4 | 4 | 2 | 359  | 40.9  | 5.47  | 10.34 | 4 | 1 |
| -<br>1.054E+18 | IsMasterProtein | A0A8C4ZC97  | Sacsin molecular chaperone OS=Gadus morhua OX=8049 GN=SACS PE=4 SV=1                                | 1  | 4 | 4 | 4 | 4574 | 519.7 | 6.86  | 10.33 | 4 | 1 |
| 1.7156E+18     | IsMasterProtein | A0A8C5A6P3  | Rho/rac guanine nucleotide exchange factor (GEF) 18a OS=Gadus morhua OX=8049 GN=arhgef18a PE=4 SV=1 | 5  | 2 | 4 | 2 | 1029 | 116.4 | 6.64  | 10.33 | 2 | 1 |
| -<br>3.97E+18  | IsMasterProtein | A0A8C5FF51  | Titin homolog OS=Gadus morhua OX=8049 GN=si:ch73-138n13.1 PE=4 SV=1                                 | 5  | 4 | 4 | 4 | 1802 | 205.6 | 8.97  | 10.32 | 4 | 1 |
| -<br>3.395E+18 | IsMasterProtein | A0A8C5CU26  | NK3 homeobox 2 OS=Gadus morhua OX=8049 GN=nkx3-2 PE=4 SV=1                                          | 11 | 3 | 4 | 3 | 279  | 30.9  | 5.59  | 10.32 | 3 | 1 |
| 5.2206E+18     | IsMasterProtein | A0A8C5B8J4  | Uncharacterized protein OS=Gadus morhua OX=8049 PE=4 SV=1                                           | 9  | 4 | 4 | 4 | 844  | 97.4  | 7.5   | 10.32 | 4 | 1 |
| -<br>3.673E+18 | IsMasterProtein | A0A8C5B0G0  | Nucleoporin 188 OS=Gadus morhua OX=8049 PE=4 SV=1                                                   | 4  | 4 | 4 | 4 | 1671 | 186.3 | 6.48  | 10.31 | 4 | 1 |
| -<br>1.827E+18 | IsMasterProtein | A0A8C4ZBG8  | Amyloid beta precursor protein binding family B member 2 OS=Gadus morhua OX=8049 GN=APBB2 PE=4 SV=1 | 8  | 3 | 4 | 3 | 717  | 78.6  | 6.86  | 10.3  | 3 | 1 |
| -<br>3.399E+18 | IsMasterProtein | A0A8C5BHD6  | 40S ribosomal protein S19 OS=Gadus morhua OX=8049 PE=3 SV=1                                         | 28 | 4 | 4 | 4 | 152  | 16.9  | 10.01 | 10.3  | 4 | 1 |
| -<br>8.528E+18 | IsMasterProtein | A0A8C4ZEA4  | HECT-type E3 ubiquitin transferase OS=Gadus morhua OX=8049 PE=4 SV=1                                | 7  | 4 | 4 | 2 | 1264 | 141.7 | 7.4   | 10.3  | 4 | 1 |
| -<br>4.059E+18 | IsMasterProtein | A0A8C5A1U5  | Proteasome subunit alpha type OS=Gadus morhua OX=8049 GN=psma1 PE=3 SV=1                            | 14 | 4 | 4 | 4 | 293  | 32.5  | 7.05  | 10.29 | 4 | 1 |
| -<br>5.233E+18 | IsMasterProtein | A0A8C5F462  | HECT domain-containing protein OS=Gadus morhua OX=8049 PE=4 SV=1                                    | 2  | 4 | 4 | 4 | 4138 | 450.8 | 6.48  | 10.25 | 4 | 1 |
| 6.5174E+18     | IsMasterProtein | A0A8C4ZN86  | Palmitoyl-protein thioesterase 1 OS=Gadus morhua OX=8049 GN=ppt1 PE=3 SV=1                          | 16 | 3 | 3 | 3 | 303  | 34    | 7.37  | 10.22 | 3 | 1 |
| 1.0911E+18     | IsMasterProtein | A0A8C5AT28  | Uncharacterized protein OS=Gadus morhua OX=8049 PE=4 SV=1                                           | 15 | 3 | 3 | 2 | 227  | 24.2  | 8     | 10.22 | 3 | 1 |
| 4.6172E+18     | IsMasterProtein | A0A8C4ZLT1  | Filamin A interacting protein 1a OS=Gadus morhua OX=8049 PE=4 SV=1                                  | 2  | 2 | 4 | 2 | 1105 | 124.5 | 8.53  | 10.22 | 2 | 1 |
| -<br>7.714E+18 | IsMasterProtein | cRAP_P02662 | Alpha-S1-casein OS=Bos taurus GN=CSN1S1 PE=1 SV=2                                                   | 22 | 4 | 4 | 4 | 214  | 24.5  | 5.02  | 10.22 | 4 | 1 |
| -<br>1.224E+18 | IsMasterProtein | A0A8C5CA69  | Protein disulfide-isomerase OS=Gadus morhua OX=8049 GN=txndc5 PE=3 SV=1                             | 7  | 3 | 4 | 3 | 414  | 46.7  | 5.3   | 10.22 | 3 | 1 |
| 6.1112E+18     | IsMasterProtein | A0A8C5CV51  | E2F transcription factor 2 OS=Gadus morhua OX=8049 GN=e2f2 PE=3 SV=1                                | 11 | 2 | 3 | 2 | 455  | 49.3  | 5.71  | 10.2  | 2 | 1 |
| 8.9542E+18     | IsMasterProtein | A0A8C5BSN6  | Uncharacterized protein OS=Gadus morhua OX=8049 PE=3 SV=1                                           | 4  | 4 | 4 | 4 | 2751 | 296.9 | 6.04  | 10.18 | 4 | 1 |
| -<br>4.627E+18 | IsMasterProtein | A0A8C5AQQ3  | HP domain-containing protein OS=Gadus morhua OX=8049 PE=3 SV=1                                      | 4  | 4 | 4 | 4 | 2426 | 270.3 | 6.54  | 10.16 | 4 | 1 |
| -<br>1.589E+18 | IsMasterProtein | A0A8C5ANN6  | Adenosine deaminase RNA specific B2 (inactive) OS=Gadus morhua OX=8049 GN=ADARB2 PE=4 SV=1          | 12 | 4 | 4 | 4 | 635  | 67.9  | 10.71 | 10.15 | 4 | 1 |

|            |                 |            |                                                                                                                     |    |   |   |   |      |       |       |       |   |   |
|------------|-----------------|------------|---------------------------------------------------------------------------------------------------------------------|----|---|---|---|------|-------|-------|-------|---|---|
| 2.7392E+18 | IsMasterProtein | A0A8C5BTK7 | Receptor protein-tyrosine kinase OS=Gadus morhua OX=8049 GN=erbb3b PE=4 SV=1                                        | 4  | 3 | 4 | 3 | 1457 | 161.1 | 6.42  | 10.13 | 3 | 1 |
| 2.7184E+18 | IsMasterProtein | A0A8C5CCK4 | Uncharacterized protein OS=Gadus morhua OX=8049 PE=4 SV=1                                                           | 4  | 4 | 4 | 4 | 3266 | 365.3 | 6.52  | 10.12 | 4 | 1 |
| -8.264E+18 | IsMasterProtein | A0A8C5BLT5 | Arf-GAP with coiled-coil, ANK repeat and PH domain-containing protein OS=Gadus morhua OX=8049 PE=4 SV=1             | 13 | 4 | 4 | 4 | 595  | 66.6  | 8.22  | 10.07 | 4 | 1 |
| -6.915E+18 | IsMasterProtein | A0A8C4YY58 | Intraflagellar transport 81 homolog OS=Gadus morhua OX=8049 GN=ift81 PE=4 SV=1                                      | 9  | 4 | 4 | 4 | 637  | 74.1  | 7.5   | 10.05 | 4 | 1 |
| -1.81E+18  | IsMasterProtein | A0A8C5BMH3 | AAA domain-containing protein OS=Gadus morhua OX=8049 PE=3 SV=1                                                     | 2  | 3 | 4 | 3 | 1984 | 207.8 | 9.48  | 10.04 | 3 | 1 |
| -1.753E+18 | IsMasterProtein | A0A8C4YUG8 | Transcription factor BTF3 OS=Gadus morhua OX=8049 PE=3 SV=1                                                         | 14 | 2 | 3 | 2 | 216  | 24.2  | 8.6   | 10.02 | 2 | 1 |
| -7.751E+18 | IsMasterProtein | A0A8C5C1V7 | FERM, RhoGEF and pleckstrin domain protein 2 OS=Gadus morhua OX=8049 PE=4 SV=1                                      | 7  | 2 | 3 | 2 | 757  | 82.4  | 6.37  | 10.02 | 2 | 1 |
| -6.019E+18 | IsMasterProtein | A0A8C4ZE04 | Signal-induced proliferation-associated 1 like 1 OS=Gadus morhua OX=8049 GN=sipa111 PE=4 SV=1                       | 4  | 4 | 4 | 4 | 1918 | 204.5 | 8.84  | 9.99  | 4 | 1 |
| -6.466E+18 | IsMasterProtein | A0A8C4ZY54 | Protein kinase C and casein kinase substrate in neurons protein 1 OS=Gadus morhua OX=8049 GN=LOC115557589 PE=4 SV=1 | 10 | 4 | 4 | 4 | 419  | 48    | 5.41  | 9.97  | 4 | 1 |
| -3.437E+18 | IsMasterProtein | A0A8C5BJ37 | E3 ubiquitin-protein ligase OS=Gadus morhua OX=8049 PE=3 SV=1                                                       | 4  | 4 | 4 | 4 | 2058 | 227   | 8.65  | 9.97  | 4 | 1 |
| 6.7091E+18 | IsMasterProtein | A0A8C5FJA9 | Ras-related protein Rab-11B OS=Gadus morhua OX=8049 GN=LOC115549210 PE=4 SV=1                                       | 39 | 4 | 4 | 3 | 218  | 24.5  | 5.94  | 9.96  | 4 | 1 |
| -9.319E+16 | IsMasterProtein | A0A8C5F6E6 | 60S ribosomal protein L27 OS=Gadus morhua OX=8049 GN=rpl27 PE=3 SV=1                                                | 36 | 4 | 4 | 4 | 136  | 15.8  | 10.56 | 9.95  | 4 | 1 |
| 5.4765E+18 | IsMasterProtein | A0A8C5APJ5 | Phosphatase and actin regulator OS=Gadus morhua OX=8049 PE=3 SV=1                                                   | 8  | 2 | 4 | 2 | 588  | 63.6  | 8.84  | 9.95  | 2 | 1 |
| -5.607E+18 | IsMasterProtein | A0A8C5BYB6 | Rho GTPase activating protein 23b OS=Gadus morhua OX=8049 PE=4 SV=1                                                 | 3  | 2 | 4 | 2 | 1377 | 152.3 | 8.25  | 9.95  | 2 | 1 |
| -6.831E+18 | IsMasterProtein | A0A8C5F6M6 | Potassium inwardly rectifying channel subfamily J member 11, like OS=Gadus morhua OX=8049 GN=kcnej111 PE=3 SV=1     | 6  | 2 | 4 | 2 | 442  | 48.2  | 7.93  | 9.95  | 2 | 1 |
| 2.2938E+18 | IsMasterProtein | A0A8C5AJZ1 | High density lipoprotein binding protein a OS=Gadus morhua OX=8049 PE=4 SV=1                                        | 5  | 4 | 4 | 4 | 1237 | 137.3 | 6.76  | 9.94  | 4 | 1 |
| -2.864E+18 | IsMasterProtein | A0A8C5AVB3 | Neurofilament medium polypeptide OS=Gadus morhua OX=8049 PE=3 SV=1                                                  | 4  | 4 | 4 | 2 | 1273 | 137   | 4.86  | 9.89  | 4 | 1 |
| -5.688E+18 | IsMasterProtein | A0A8C4ZDW5 | UTP6 small subunit processome component OS=Gadus morhua OX=8049 GN=utp6 PE=3 SV=1                                   | 8  | 3 | 4 | 3 | 577  | 67    | 7.47  | 9.88  | 3 | 1 |
| -7.736E+17 | IsMasterProtein | A0A8C5AK81 | Uncharacterized protein OS=Gadus morhua OX=8049 PE=4 SV=1                                                           | 5  | 3 | 3 | 2 | 942  | 104.9 | 5.95  | 9.88  | 3 | 1 |
| -4.806E+18 | IsMasterProtein | A0A8C5FD39 | RNA helicase OS=Gadus morhua OX=8049 GN=ddx21 PE=3 SV=1                                                             | 6  | 4 | 4 | 4 | 760  | 82.7  | 8.6   | 9.88  | 4 | 1 |
| -6.137E+18 | IsMasterProtein | A0A8C5CTW8 | Cystatin-like OS=Gadus morhua OX=8049 GN=LOC115559797 PE=4 SV=1                                                     | 26 | 4 | 4 | 4 | 160  | 17.6  | 8.88  | 9.87  | 4 | 1 |

|                |                     |                |                                                                                                                            |    |   |   |   |      |           |           |      |   |   |
|----------------|---------------------|----------------|----------------------------------------------------------------------------------------------------------------------------|----|---|---|---|------|-----------|-----------|------|---|---|
| -<br>8.027E+18 | IsMasterProt<br>ein | A0A8C5AFU<br>2 | Ribosomal_S7 domain-containing protein OS=Gadus morhua OX=8049<br>PE=3 SV=1                                                | 21 | 4 | 4 | 4 | 214  | 23.9      | 9.69      | 9.84 | 4 | 1 |
| -<br>8.867E+18 | IsMasterProt<br>ein | A0A8C5AK4<br>8 | LPS-responsive vesicle trafficking, beach and anchor containing<br>OS=Gadus morhua OX=8049 PE=4 SV=1                       | 1  | 3 | 4 | 3 | 2801 | 308.<br>2 | 5.36      | 9.82 | 3 | 1 |
| -<br>5.296E+18 | IsMasterProt<br>ein | A0A8C4YZL<br>5 | Ribosomal protein L24 OS=Gadus morhua OX=8049 GN=RPL24 PE=3<br>SV=1                                                        | 19 | 3 | 4 | 3 | 157  | 18        | 11.1<br>7 | 9.82 | 3 | 1 |
| -<br>4.599E+18 | IsMasterProt<br>ein | A0A8C4YTJ<br>9 | Uncharacterized protein OS=Gadus morhua OX=8049 PE=4 SV=1                                                                  | 5  | 4 | 4 | 4 | 1577 | 174.<br>7 | 7.97      | 9.81 | 4 | 1 |
| -<br>6.794E+18 | IsMasterProt<br>ein | A0A8C5C5A<br>3 | Phospholipase D4-like OS=Gadus morhua OX=8049 GN=LOC115543820<br>PE=3 SV=1                                                 | 6  | 2 | 3 | 2 | 486  | 54        | 6.1       | 9.81 | 2 | 1 |
| 7.2959E+<br>18 | IsMasterProt<br>ein | A0A8C4Z0H<br>7 | Glypican 4 OS=Gadus morhua OX=8049 GN=gpc4 PE=3 SV=1                                                                       | 10 | 3 | 3 | 3 | 563  | 62.4      | 8.1       | 9.8  | 3 | 1 |
| -<br>3.877E+18 | IsMasterProt<br>ein | A0A8C5B6H<br>4 | von Willebrand factor A domain containing 8 OS=Gadus morhua<br>OX=8049 PE=4 SV=1                                           | 4  | 3 | 3 | 3 | 1780 | 197.<br>1 | 6.84      | 9.76 | 3 | 1 |
| 8.6123E+<br>18 | IsMasterProt<br>ein | A0A8C5BNQ<br>8 | Interferon-induced GTP-binding protein Mx OS=Gadus morhua OX=8049<br>PE=3 SV=1                                             | 8  | 4 | 4 | 4 | 835  | 93.5      | 7.15      | 9.73 | 4 | 1 |
| 2.4536E+<br>18 | IsMasterProt<br>ein | A0A8C4Z6Z<br>2 | Charged multivesicular body protein 5b OS=Gadus morhua OX=8049<br>GN=chmp5b PE=3 SV=1                                      | 20 | 3 | 4 | 2 | 220  | 24.7      | 4.83      | 9.71 | 3 | 1 |
| -<br>3.982E+18 | IsMasterProt<br>ein | A0A8C5F5Q<br>6 | Uncharacterized protein OS=Gadus morhua OX=8049 PE=4 SV=1                                                                  | 23 | 4 | 4 | 2 | 201  | 22.2      | 5.73      | 9.71 | 4 | 1 |
| -<br>1.028E+18 | IsMasterProt<br>ein | A0A8C4ZP8<br>0 | Dynein, axonemal, heavy chain 12 OS=Gadus morhua OX=8049 PE=3<br>SV=1                                                      | 2  | 4 | 4 | 4 | 3850 | 438.<br>9 | 5.77      | 9.71 | 4 | 1 |
| 4.5962E+<br>18 | IsMasterProt<br>ein | A0A8C5C3P<br>9 | NACHT domain-containing protein OS=Gadus morhua OX=8049 PE=4<br>SV=1                                                       | 9  | 3 | 3 | 2 | 1105 | 123.<br>9 | 7.15      | 9.69 | 3 | 1 |
| -<br>4.222E+18 | IsMasterProt<br>ein | A0A8C5A4P<br>9 | Dynein axonemal heavy chain 10 OS=Gadus morhua OX=8049<br>GN=DNAH10 PE=3 SV=1                                              | 1  | 4 | 4 | 4 | 4467 | 508.<br>9 | 6.18      | 9.67 | 4 | 1 |
| 3.7357E+<br>18 | IsMasterProt<br>ein | A0A8C4ZJ7<br>4 | Splicing factor, arginine/serine-rich 1 OS=Gadus morhua OX=8049<br>GN=LOC115547035 PE=3 SV=1                               | 22 | 4 | 4 | 2 | 239  | 26.7      | 9.98      | 9.66 | 4 | 1 |
| 4.4442E+<br>17 | IsMasterProt<br>ein | A0A8C5C2D<br>2 | RNAse_Pc domain-containing protein OS=Gadus morhua OX=8049 PE=3<br>SV=1                                                    | 31 | 3 | 4 | 3 | 144  | 16.4      | 8.9       | 9.63 | 3 | 1 |
| -<br>2.575E+18 | IsMasterProt<br>ein | A0A8C4ZZ7<br>4 | Family with sequence similarity 120C OS=Gadus morhua OX=8049<br>GN=hsd17b10 PE=3 SV=1                                      | 4  | 3 | 3 | 2 | 1202 | 130.<br>7 | 8.75      | 9.61 | 3 | 1 |
| -<br>3.989E+18 | IsMasterProt<br>ein | A0A8C4ZY1<br>6 | E3 UFM1-protein ligase 1 OS=Gadus morhua OX=8049 GN=uf1l PE=3<br>SV=1                                                      | 7  | 3 | 4 | 3 | 747  | 82.8      | 6.84      | 9.59 | 3 | 1 |
| -<br>6.018E+18 | IsMasterProt<br>ein | A0A8C5CAE<br>9 | Tight junction protein 1a OS=Gadus morhua OX=8049 GN=tjp1a PE=3<br>SV=1                                                    | 3  | 4 | 4 | 4 | 1848 | 202.<br>5 | 6.33      | 9.57 | 4 | 1 |
| 3.3217E+<br>18 | IsMasterProt<br>ein | A0A8C5F64<br>6 | A disintegrin and metalloproteinase with thrombospondin motifs 2-like<br>OS=Gadus morhua OX=8049 GN=LOC115547047 PE=4 SV=1 | 5  | 2 | 3 | 2 | 1109 | 124.<br>3 | 8         | 9.54 | 2 | 1 |
| -<br>7.225E+18 | IsMasterProt<br>ein | A0A8C4ZLA<br>8 | Uncharacterized protein OS=Gadus morhua OX=8049 PE=3 SV=1                                                                  | 6  | 2 | 3 | 2 | 551  | 58.3      | 6.32      | 9.54 | 2 | 1 |
| -<br>8.858E+18 | IsMasterProt<br>ein | A0A8C5AKH<br>3 | Centromere protein F OS=Gadus morhua OX=8049 GN=cenpf PE=4<br>SV=1                                                         | 3  | 4 | 4 | 4 | 2668 | 299.<br>1 | 5.22      | 9.52 | 4 | 1 |



|                |                     |                 |                                                                                                      |    |   |   |   |      |           |      |      |   |   |
|----------------|---------------------|-----------------|------------------------------------------------------------------------------------------------------|----|---|---|---|------|-----------|------|------|---|---|
| -<br>9.093E+18 | IsMasterProt<br>ein | A0A8C5A02<br>6  | Stress-induced-phosphoprotein 1 OS=Gadus morhua OX=8049 GN=stip1<br>PE=4 SV=1                        | 8  | 4 | 4 | 4 | 542  | 61.3      | 7.09 | 9.52 | 4 | 1 |
| -<br>2.31E+18  | IsMasterProt<br>ein | A0A8C5A9V<br>3  | TTF-type domain-containing protein OS=Gadus morhua OX=8049 PE=4<br>SV=1                              | 5  | 3 | 4 | 2 | 727  | 82.4      | 7.23 | 9.51 | 3 | 1 |
| 8.6045E+18     | IsMasterProt<br>ein | A0A8C5FMA<br>7  | Lumican OS=Gadus morhua OX=8049 GN=lum PE=3 SV=1                                                     | 13 | 3 | 3 | 3 | 346  | 38.5      | 6.32 | 9.5  | 3 | 1 |
| 7.7199E+18     | IsMasterProt<br>ein | A0A8C4ZEX<br>3  | Elongation factor G, mitochondrial OS=Gadus morhua OX=8049<br>GN=gfm1 PE=3 SV=1                      | 6  | 3 | 4 | 3 | 726  | 80.9      | 5.91 | 9.49 | 3 | 1 |
| -<br>1.899E+18 | IsMasterProt<br>ein | A0A8C4YW<br>M3  | Protein phosphatase 1 regulatory subunit 9A-like A OS=Gadus morhua<br>OX=8049 GN=ppp1r9ala PE=4 SV=1 | 4  | 4 | 4 | 4 | 1436 | 156.<br>9 | 4.97 | 9.48 | 4 | 1 |
| -<br>7.94E+18  | IsMasterProt<br>ein | A0A8C5AG0<br>1  | Solute carrier family 12 member 10, tandem duplicate 1 OS=Gadus<br>morhua OX=8049 PE=3 SV=1          | 7  | 4 | 4 | 4 | 1053 | 115.<br>6 | 7.5  | 9.46 | 4 | 1 |
| 4.586E+18      | IsMasterProt<br>ein | A0A8C5F6T4      | Uncharacterized protein OS=Gadus morhua OX=8049 PE=4 SV=1                                            | 16 | 4 | 4 | 4 | 293  | 32.6      | 9.11 | 9.45 | 4 | 1 |
| -<br>1.148E+18 | IsMasterProt<br>ein | A0A8C4ZH<br>M4  | Apolipoprotein C-I OS=Gadus morhua OX=8049 GN=apoc1 PE=3 SV=1                                        | 29 | 3 | 4 | 3 | 92   | 10        | 4.77 | 9.43 | 3 | 1 |
| 2.8676E+18     | IsMasterProt<br>ein | cRAP_P1208<br>1 | Histidine--tRNA ligase, cytoplasmic OS=Homo sapiens GN=HARS PE=1<br>SV=2                             | 6  | 3 | 4 | 3 | 509  | 57.4      | 5.88 | 9.43 | 3 | 1 |
| 2.3673E+18     | IsMasterProt<br>ein | A0A8C5FH2<br>7  | Parvalbumin OS=Gadus morhua OX=8049 GN=LOC115537726 PE=3<br>SV=1                                     | 34 | 4 | 4 | 3 | 114  | 12.4      | 5.06 | 9.43 | 4 | 1 |
| -<br>8.566E+18 | IsMasterProt<br>ein | A0A8C5BB2<br>9  | Serine/threonine kinase 24b (STE20 homolog, yeast) OS=Gadus morhua<br>OX=8049 GN=stk24b PE=4 SV=1    | 11 | 2 | 4 | 2 | 437  | 48.8      | 6.13 | 9.42 | 2 | 1 |
| -<br>2.986E+18 | IsMasterProt<br>ein | A0A8C5CLJ9      | DDE Tnp 1 7 domain-containing protein OS=Gadus morhua OX=8049<br>PE=4 SV=1                           | 13 | 3 | 3 | 3 | 677  | 76.2      | 9.17 | 9.41 | 3 | 1 |
| -<br>4.808E+18 | IsMasterProt<br>ein | A0A8C4ZFZ<br>2  | Peptidyl-prolyl cis-trans isomerase OS=Gadus morhua OX=8049<br>GN=LOC115545253 PE=3 SV=1             | 26 | 3 | 3 | 3 | 164  | 17.5      | 7.85 | 9.41 | 3 | 1 |
| -<br>7.185E+17 | IsMasterProt<br>ein | A0A8C5D0P<br>0  | UTP20 small subunit processome component OS=Gadus morhua<br>OX=8049 PE=4 SV=1                        | 2  | 3 | 4 | 3 | 2545 | 288       | 7.56 | 9.41 | 3 | 1 |
| 1.9916E+18     | IsMasterProt<br>ein | A0A8C4YW<br>Q7  | Xin actin binding repeat containing 2a OS=Gadus morhua OX=8049 PE=3<br>SV=1                          | 5  | 4 | 4 | 4 | 1490 | 170       | 5    | 9.39 | 4 | 1 |
| -<br>5.994E+18 | IsMasterProt<br>ein | A0A8C5B9Y<br>7  | Uncharacterized protein OS=Gadus morhua OX=8049 PE=4 SV=1                                            | 13 | 3 | 3 | 3 | 671  | 74.4      | 6.32 | 9.39 | 3 | 1 |
| -<br>4.994E+18 | IsMasterProt<br>ein | P21919          | Somatolactin OS=Gadus morhua OX=8049 PE=1 SV=2                                                       | 33 | 3 | 3 | 3 | 235  | 27        | 5.44 | 9.38 | 3 | 1 |
| 2.9041E+18     | IsMasterProt<br>ein | A0A8C4Z4T<br>9  | 60S ribosomal protein L12 OS=Gadus morhua OX=8049 PE=3 SV=1                                          | 26 | 3 | 3 | 3 | 168  | 18        | 9.39 | 9.37 | 3 | 1 |
| -<br>7.575E+18 | IsMasterProt<br>ein | A0A8C5CHK<br>1  | Poly [ADP-ribose] polymerase OS=Gadus morhua OX=8049 GN=parp4<br>PE=3 SV=1                           | 4  | 4 | 4 | 4 | 2026 | 223       | 5.68 | 9.37 | 4 | 1 |
| -<br>8.902E+18 | IsMasterProt<br>ein | A0A8C5CQP<br>1  | Superoxide dismutase [Mn], mitochondrial OS=Gadus morhua OX=8049<br>PE=3 SV=1                        | 27 | 3 | 3 | 3 | 261  | 28.8      | 9.11 | 9.36 | 3 | 1 |
| -<br>6.928E+18 | IsMasterProt<br>ein | A0A8C4Z8T<br>5  | Eukaryotic translation initiation factor 5A OS=Gadus morhua OX=8049<br>GN=EIF5A PE=3 SV=1            | 22 | 2 | 3 | 2 | 166  | 18.3      | 7.37 | 9.34 | 2 | 1 |
| 1.9E+18        | IsMasterProt<br>ein | A0A8C4YT7<br>0  | Myosin, light chain 1, alkali; skeletal, fast OS=Gadus morhua OX=8049<br>GN=myl1 PE=4 SV=1           | 26 | 4 | 4 | 2 | 194  | 21.2      | 4.83 | 9.33 | 4 | 1 |

|                |                 |             |                                                                                                             |    |   |   |   |      |       |       |      |   |   |
|----------------|-----------------|-------------|-------------------------------------------------------------------------------------------------------------|----|---|---|---|------|-------|-------|------|---|---|
| -<br>6.754E+18 | IsMasterProtein | A0A8C5FD21  | Ribosomal protein L4 OS=Gadus morhua OX=8049 GN=rp14 PE=3 SV=1                                              | 13 | 4 | 4 | 4 | 374  | 42    | 11.27 | 9.33 | 4 | 1 |
| -<br>4.382E+18 | IsMasterProtein | A0A8C4ZW B3 | Sulfotransferase OS=Gadus morhua OX=8049 GN=chst3a PE=3 SV=1                                                | 10 | 4 | 4 | 4 | 428  | 49    | 8.75  | 9.31 | 4 | 1 |
| 3.6554E+18     | IsMasterProtein | A0A8C4ZH29  | Transformer 2 alpha homolog OS=Gadus morhua OX=8049 PE=4 SV=1                                               | 26 | 3 | 3 | 3 | 186  | 21.1  | 10.1  | 9.3  | 3 | 1 |
| 5.2731E+18     | IsMasterProtein | A0A8C4ZVJ6  | FERM and PDZ domain containing 2 OS=Gadus morhua OX=8049 GN=frmpd2 PE=4 SV=1                                | 7  | 3 | 3 | 3 | 1151 | 127.1 | 7.18  | 9.28 | 3 | 1 |
| 3.4649E+18     | IsMasterProtein | A0A8C5D1T0  | RNA helicase OS=Gadus morhua OX=8049 PE=3 SV=1                                                              | 2  | 2 | 4 | 2 | 1279 | 143.6 | 7.17  | 9.28 | 2 | 1 |
| -<br>1.303E+18 | IsMasterProtein | A0A8C5FJ16  | Ribonucleoprotein OS=Gadus morhua OX=8049 GN=snu13b PE=3 SV=1                                               | 33 | 3 | 3 | 3 | 130  | 14.3  | 8.46  | 9.27 | 3 | 1 |
| 2.2184E+18     | IsMasterProtein | A0A8C5B309  | Polypeptide N-acetylgalactosaminyltransferase OS=Gadus morhua OX=8049 GN=galnt1 PE=3 SV=1                   | 10 | 4 | 4 | 4 | 524  | 60.3  | 7.56  | 9.25 | 4 | 1 |
| -<br>4.307E+18 | IsMasterProtein | A0A8C4Z6X9  | Tumor protein, translationally-controlled 1 OS=Gadus morhua OX=8049 GN=tp1 PE=3 SV=1                        | 22 | 3 | 3 | 3 | 171  | 19.5  | 4.7   | 9.25 | 3 | 1 |
| -<br>8.822E+18 | IsMasterProtein | A0A8C5AAB6  | Coagulation factor VIII, procoagulant component OS=Gadus morhua OX=8049 GN=f8 PE=3 SV=1                     | 6  | 3 | 4 | 3 | 1342 | 151   | 7.06  | 9.25 | 3 | 1 |
| -<br>4.378E+18 | IsMasterProtein | A0A8C5BVY4  | Chromodomain-helicase-DNA-binding protein 8 OS=Gadus morhua OX=8049 GN=chd8 PE=3 SV=1                       | 2  | 3 | 4 | 3 | 2608 | 288.7 | 5.99  | 9.24 | 3 | 1 |
| -<br>5.891E+18 | IsMasterProtein | A0A8C4ZTH9  | Ras-related protein Rap-1b OS=Gadus morhua OX=8049 GN=LOC115550068 PE=4 SV=1                                | 15 | 2 | 3 | 2 | 185  | 21.1  | 6.71  | 9.24 | 2 | 1 |
| 5.7565E+18     | IsMasterProtein | A0A8C4ZT87  | FYVE and coiled-coil domain-containing protein 1-like OS=Gadus morhua OX=8049 GN=LOC115549502 PE=4 SV=1     | 3  | 4 | 4 | 4 | 1264 | 143.2 | 5.43  | 9.24 | 4 | 1 |
| -<br>8.969E+18 | IsMasterProtein | A0A8C5CNQ4  | Aconitate hydratase, mitochondrial OS=Gadus morhua OX=8049 GN=ACO2 PE=3 SV=1                                | 5  | 3 | 3 | 2 | 776  | 83.9  | 6.58  | 9.23 | 3 | 1 |
| -<br>6.789E+18 | IsMasterProtein | A0A8C5B2B4  | Nuclear casein kinase and cyclin-dependent kinase substrate 1a OS=Gadus morhua OX=8049 GN=nucks1a PE=4 SV=1 | 11 | 3 | 3 | 3 | 368  | 40.8  | 4.86  | 9.23 | 3 | 1 |
| -<br>8.999E+18 | IsMasterProtein | A0A8C4ZXC5  | Tubulin-glutamate carboxypeptidase OS=Gadus morhua OX=8049 PE=3 SV=1                                        | 4  | 2 | 4 | 2 | 1151 | 128.7 | 6.84  | 9.21 | 2 | 1 |
| -<br>4.291E+18 | IsMasterProtein | A0A8C5BEW3  | Uncharacterized protein OS=Gadus morhua OX=8049 PE=4 SV=1                                                   | 2  | 4 | 4 | 4 | 3268 | 357.8 | 4.77  | 9.21 | 4 | 1 |
| -<br>7.995E+17 | IsMasterProtein | A0A8C4Z6D3  | HHIP-like 1 OS=Gadus morhua OX=8049 GN=HHIPL1 PE=4 SV=1                                                     | 7  | 3 | 3 | 3 | 799  | 89.5  | 6.23  | 9.21 | 3 | 1 |
| -<br>1.884E+18 | IsMasterProtein | A0A8C5C078  | AP complex subunit beta OS=Gadus morhua OX=8049 PE=3 SV=1                                                   | 4  | 4 | 4 | 4 | 948  | 104   | 5.16  | 9.2  | 4 | 1 |
| 7.5104E+18     | IsMasterProtein | A0A8C5BY88  | RNA polymerase II associated protein 1 OS=Gadus morhua OX=8049 PE=3 SV=1                                    | 2  | 2 | 4 | 2 | 1443 | 156.9 | 6.49  | 9.19 | 2 | 1 |
| -<br>3.693E+18 | IsMasterProtein | A0A8C5CBW9  | Uncharacterized protein OS=Gadus morhua OX=8049 PE=4 SV=1                                                   | 3  | 4 | 4 | 3 | 1461 | 166.4 | 6.86  | 9.18 | 4 | 1 |
| -<br>1.527E+18 | IsMasterProtein | A0A8C4YZF4  | Self_N domain-containing protein OS=Gadus morhua OX=8049 PE=4 SV=1                                          | 19 | 3 | 3 | 3 | 215  | 23.2  | 6.84  | 9.18 | 3 | 1 |

|            |                 |            |                                                                                                         |    |   |   |   |      |       |       |      |   |   |
|------------|-----------------|------------|---------------------------------------------------------------------------------------------------------|----|---|---|---|------|-------|-------|------|---|---|
| 6.8208E+18 | IsMasterProtein | A0A8C5D0H7 | Fibronectin type III domain containing 3Ba OS=Gadus morhua OX=8049 PE=4 SV=1                            | 5  | 2 | 3 | 2 | 1140 | 124.2 | 6.47  | 9.16 | 2 | 1 |
| -          | IsMasterProtein | A0A8C4ZBZ5 | Dehydrogenase E1 and transketolase domain containing 1 OS=Gadus morhua OX=8049 GN=dhtkd1 PE=3 SV=1      | 6  | 2 | 3 | 2 | 925  | 102.6 | 6.65  | 9.15 | 2 | 1 |
| 3.14E+18   | IsMasterProtein | A0A0D3MJ10 | Cathelicidin 1 OS=Gadus morhua OX=8049 PE=4 SV=1                                                        | 14 | 2 | 3 | 2 | 193  | 20.5  | 10.48 | 9.15 | 2 | 1 |
| 4.652E+18  | IsMasterProtein | A0A8C4ZH42 | Insulin-like growth factor-binding protein 4 OS=Gadus morhua OX=8049 PE=4 SV=1                          | 18 | 3 | 3 | 3 | 245  | 26.6  | 7.99  | 9.14 | 3 | 1 |
| 5.859E+18  | IsMasterProtein | A0A8C4ZJ55 | Membrane associated guanylate kinase, WW and PDZ domain containing 3b OS=Gadus morhua OX=8049 PE=4 SV=1 | 5  | 4 | 4 | 3 | 1412 | 151.6 | 8.63  | 9.1  | 4 | 1 |
| 5.449E+18  | IsMasterProtein | A0A8C5F5C7 | 40S ribosomal protein S15a OS=Gadus morhua OX=8049 PE=3 SV=1                                            | 10 | 2 | 4 | 2 | 166  | 19.3  | 10.14 | 9.1  | 2 | 1 |
| 3.859E+18  | IsMasterProtein | A0A8C5ARL4 | Neprilysin OS=Gadus morhua OX=8049 GN=MME PE=4 SV=1                                                     | 6  | 4 | 4 | 4 | 768  | 87.5  | 5.95  | 9.09 | 4 | 1 |
| 2.1564E+18 | IsMasterProtein | A0A8C4ZK89 | Growth differentiation factor 11 OS=Gadus morhua OX=8049 GN=gdf11 PE=3 SV=1                             | 7  | 3 | 3 | 3 | 389  | 44    | 7.18  | 9.08 | 3 | 1 |
| 4.382E+18  | IsMasterProtein | A0A8C5C3X9 | Bromodomain-containing protein 1-like OS=Gadus morhua OX=8049 GN=LOC115532102 PE=4 SV=1                 | 2  | 2 | 4 | 2 | 1610 | 179.7 | 8.4   | 9.08 | 2 | 1 |
| 2.3094E+17 | IsMasterProtein | A0A8C5AA17 | Aspartate aminotransferase OS=Gadus morhua OX=8049 GN=GOT1 PE=3 SV=1                                    | 11 | 3 | 3 | 3 | 411  | 45.9  | 6.8   | 9.08 | 3 | 1 |
| 1.49E+18   | IsMasterProtein | A0A8C4ZPX4 | Nucleoporin 210 OS=Gadus morhua OX=8049 PE=3 SV=1                                                       | 4  | 3 | 3 | 3 | 1804 | 193.8 | 6.43  | 9.07 | 3 | 1 |
| 5.214E+18  | IsMasterProtein | A0A8C5FCA4 | Cleavage and polyadenylation specific factor 1 OS=Gadus morhua OX=8049 PE=4 SV=1                        | 6  | 3 | 3 | 3 | 1360 | 152.6 | 5.96  | 9.03 | 3 | 1 |
| 8.197E+18  | IsMasterProtein | A0A8C5F8Q7 | NPC intracellular cholesterol transporter 2 OS=Gadus morhua OX=8049 GN=np2 PE=3 SV=1                    | 28 | 2 | 3 | 2 | 149  | 16.4  | 5.45  | 8.99 | 2 | 1 |
| 5.763E+18  | IsMasterProtein | A0A8C4ZXF7 | Uncharacterized protein OS=Gadus morhua OX=8049 PE=4 SV=1                                               | 5  | 2 | 4 | 2 | 440  | 48.1  | 7.37  | 8.98 | 2 | 1 |
| -9E+18     | IsMasterProtein | A0A8C5FNY8 | Prominin 1a OS=Gadus morhua OX=8049 PE=3 SV=1                                                           | 6  | 3 | 3 | 3 | 886  | 97.9  | 6.65  | 8.98 | 3 | 1 |
| 3.24E+18   | IsMasterProtein | A0A8C5BYN7 | PDZ domain-containing protein OS=Gadus morhua OX=8049 PE=4 SV=1                                         | 5  | 4 | 4 | 4 | 1344 | 143.4 | 8.98  | 8.97 | 4 | 1 |
| 6.7548E+17 | IsMasterProtein | A0A8C5AIT6 | CAP-GLY domain containing linker protein 1a OS=Gadus morhua OX=8049 PE=4 SV=1                           | 3  | 2 | 3 | 2 | 2180 | 242.5 | 5.21  | 8.95 | 2 | 1 |
| 3.0169E+18 | IsMasterProtein | A0A8C4YZH9 | Si:ch211-66e2.5 OS=Gadus morhua OX=8049 PE=4 SV=1                                                       | 13 | 3 | 3 | 3 | 320  | 35.5  | 6.14  | 8.95 | 3 | 1 |
| 8.171E+18  | IsMasterProtein | A0A8C4YT96 | Heparanase OS=Gadus morhua OX=8049 GN=hpse PE=3 SV=1                                                    | 8  | 3 | 3 | 3 | 532  | 59.5  | 7.24  | 8.95 | 3 | 1 |
| 7.042E+18  | IsMasterProtein | A0A8C5F4S3 | Uncharacterized protein OS=Gadus morhua OX=8049 PE=4 SV=1                                               | 6  | 3 | 3 | 3 | 1070 | 112.4 | 6.11  | 8.95 | 3 | 1 |
| 5.352E+18  | IsMasterProtein | A0A8C5AEU0 | Gelsolin OS=Gadus morhua OX=8049 GN=gsna PE=4 SV=1                                                      | 8  | 3 | 3 | 3 | 776  | 85.8  | 5.34  | 8.95 | 3 | 1 |
| 1.817E+18  | IsMasterProtein | A0A8C5CGQ5 | Serine/threonine-protein phosphatase OS=Gadus morhua OX=8049 PE=3 SV=1                                  | 9  | 4 | 4 | 4 | 486  | 54.6  | 6.74  | 8.92 | 4 | 1 |
| 9.116E+18  | IsMasterProtein |            |                                                                                                         |    |   |   |   |      |       |       |      |   |   |

|                |                 |            |                                                                                                                                                  |    |   |   |   |      |       |       |      |   |   |
|----------------|-----------------|------------|--------------------------------------------------------------------------------------------------------------------------------------------------|----|---|---|---|------|-------|-------|------|---|---|
| -<br>4.201E+18 | IsMasterProtein | A0A8C5BHH2 | Ribosomal protein S14 OS=Gadus morhua OX=8049 GN=rps14 PE=3 SV=1                                                                                 | 14 | 3 | 3 | 3 | 184  | 19.8  | 9.66  | 8.91 | 3 | 1 |
| 7.7762E+18     | IsMasterProtein | A0A8C5B576 | Uncharacterized protein OS=Gadus morhua OX=8049 PE=4 SV=1                                                                                        | 3  | 2 | 3 | 2 | 1927 | 211.2 | 7.64  | 8.9  | 2 | 1 |
| -<br>3.214E+18 | IsMasterProtein | A0A8C4ZAA7 | IFI30 lysosomal thiol reductase OS=Gadus morhua OX=8049 GN=ifi30 PE=3 SV=1                                                                       | 15 | 2 | 3 | 2 | 267  | 29.6  | 6.39  | 8.9  | 2 | 1 |
| 6.2407E+18     | IsMasterProtein | A0A8C5AWW5 | Peroxisomal biogenesis factor 5-like b OS=Gadus morhua OX=8049 PE=3 SV=1                                                                         | 12 | 3 | 3 | 3 | 584  | 67.6  | 5.6   | 8.89 | 3 | 1 |
| -<br>5.149E+18 | IsMasterProtein | Q95I12     | MHC class Ia antigen (Fragment) OS=Gadus morhua OX=8049 PE=2 SV=1                                                                                | 20 | 2 | 3 | 2 | 145  | 16.8  | 4.7   | 8.88 | 2 | 1 |
| 4.8357E+18     | IsMasterProtein | A0A8C5CNP7 | FRAS1 related extracellular matrix 2b OS=Gadus morhua OX=8049 GN=frem2b PE=3 SV=1                                                                | 3  | 3 | 3 | 3 | 3065 | 338.7 | 4.92  | 8.88 | 3 | 1 |
| 9.2146E+18     | IsMasterProtein | A0A8C5FH74 | NACHT domain-containing protein OS=Gadus morhua OX=8049 PE=4 SV=1                                                                                | 6  | 3 | 3 | 2 | 775  | 87.7  | 6.96  | 8.88 | 3 | 1 |
| -<br>8.884E+18 | IsMasterProtein | A0A8C5CRJ4 | Isocitrate dehydrogenase [NAD] subunit, mitochondrial OS=Gadus morhua OX=8049 GN=LOC115558864 PE=3 SV=1                                          | 10 | 3 | 3 | 3 | 366  | 39.9  | 6.86  | 8.87 | 3 | 1 |
| -<br>2.13E+18  | IsMasterProtein | A0A8C5A5Z5 | Cathepsin D OS=Gadus morhua OX=8049 GN=ctsd PE=3 SV=1                                                                                            | 11 | 3 | 3 | 3 | 389  | 42.3  | 6.42  | 8.87 | 3 | 1 |
| -<br>6.139E+18 | IsMasterProtein | A0A8C4ZZT7 | GTP-binding nuclear protein Ran OS=Gadus morhua OX=8049 PE=3 SV=1                                                                                | 14 | 3 | 3 | 3 | 229  | 26.1  | 7.02  | 8.86 | 3 | 1 |
| -<br>8.987E+18 | IsMasterProtein | A0A8C5CS68 | Glutathione transferase OS=Gadus morhua OX=8049 GN=LOC115559880 PE=3 SV=1                                                                        | 23 | 3 | 3 | 3 | 226  | 25.7  | 6.93  | 8.86 | 3 | 1 |
| 8.0742E+18     | IsMasterProtein | A0A8C5FP22 | Inositol 1,4,5-trisphosphate receptor OS=Gadus morhua OX=8049 PE=3 SV=1                                                                          | 2  | 2 | 3 | 2 | 2535 | 288.4 | 6.71  | 8.85 | 2 | 1 |
| 2.2902E+18     | IsMasterProtein | A0A8C4ZRB3 | Calcium release activated channel regulator 2B OS=Gadus morhua OX=8049 PE=4 SV=1                                                                 | 10 | 3 | 4 | 3 | 385  | 44.4  | 5.38  | 8.84 | 3 | 1 |
| 3.1361E+18     | IsMasterProtein | A0A8C5F5B6 | Myosin, light chain 12, genome duplicate 1 OS=Gadus morhua OX=8049 GN=myl12.1 PE=4 SV=1                                                          | 17 | 3 | 3 | 3 | 172  | 19.8  | 4.81  | 8.81 | 3 | 1 |
| -<br>6.952E+18 | IsMasterProtein | A0A8C5CKJ7 | Serine/threonine-protein kinase/endoribonuclease IRE1-like OS=Gadus morhua OX=8049 GN=LOC115529656 PE=4 SV=1                                     | 5  | 2 | 3 | 2 | 927  | 105.1 | 7.02  | 8.81 | 2 | 1 |
| -<br>8.21E+18  | IsMasterProtein | A0A8C4ZSV3 | Creatine kinase OS=Gadus morhua OX=8049 GN=LOC115551044 PE=3 SV=1                                                                                | 11 | 3 | 3 | 3 | 453  | 50.7  | 8.47  | 8.81 | 3 | 1 |
| -<br>5.893E+18 | IsMasterProtein | A0A8C5B1W4 | CARD domain-containing protein OS=Gadus morhua OX=8049 PE=4 SV=1                                                                                 | 28 | 3 | 3 | 3 | 113  | 12.7  | 5.15  | 8.79 | 3 | 1 |
| 7.785E+18      | IsMasterProtein | A0A8C5F476 | Voltage-gated potassium channel subunit beta-1 OS=Gadus morhua OX=8049 GN=LOC115547588 PE=3 SV=1                                                 | 9  | 3 | 4 | 2 | 427  | 47.2  | 8.46  | 8.79 | 3 | 1 |
| -<br>1.784E+18 | IsMasterProtein | A0A8C5CMX1 | von Willebrand factor D and EGF domain-containing protein-like OS=Gadus morhua OX=8049 GN=si:ch211-246m6.5 PE=4 SV=1                             | 3  | 2 | 3 | 2 | 2145 | 230.2 | 7.27  | 8.79 | 2 | 1 |
| -<br>2.724E+18 | IsMasterProtein | A0A8C5CFW8 | SWI/SNF related, matrix associated, actin dependent regulator of chromatin, subfamily c, member 1a OS=Gadus morhua OX=8049 GN=smarcc1a PE=4 SV=1 | 5  | 3 | 4 | 3 | 916  | 102.7 | 6.24  | 8.78 | 3 | 1 |
| -<br>3.733E+18 | IsMasterProtein | A0A8C5FU09 | Ribosomal protein L18 OS=Gadus morhua OX=8049 PE=3 SV=1                                                                                          | 25 | 3 | 3 | 3 | 132  | 15.3  | 11.81 | 8.75 | 3 | 1 |
| 5.5563E+18     | IsMasterProtein | A0A8C4ZXR0 | PINc domain-containing protein OS=Gadus morhua OX=8049 PE=4 SV=1                                                                                 | 8  | 2 | 3 | 2 | 635  | 68.9  | 9.35  | 8.75 | 2 | 1 |

|                 |                     |                |                                                                                                                     |    |   |   |   |      |           |      |      |   |   |
|-----------------|---------------------|----------------|---------------------------------------------------------------------------------------------------------------------|----|---|---|---|------|-----------|------|------|---|---|
| -<br>7.629E+18  | IsMasterProt<br>ein | A0A8C5FHS<br>6 | Ribonucleoside-diphosphate reductase OS=Gadus morhua OX=8049<br>GN=LOC115547553 PE=3 SV=1                           | 6  | 2 | 3 | 2 | 828  | 93.7      | 6.57 | 8.75 | 2 | 1 |
| -<br>2.403E+18  | IsMasterProt<br>ein | A0A8C5FRN<br>5 | Basic leucine zipper and W2 domain-containing protein 1-A OS=Gadus<br>morhua OX=8049 GN=LOC115533261 PE=3 SV=1      | 11 | 3 | 3 | 3 | 427  | 49        | 5.76 | 8.74 | 3 | 1 |
| -<br>2.4209E+18 | IsMasterProt<br>ein | A0A8C5CDX<br>8 | Zinc finger CCCH-type containing 12B OS=Gadus morhua OX=8049<br>GN=zc3h12b PE=3 SV=1                                | 6  | 2 | 3 | 2 | 870  | 94.9      | 7.42 | 8.74 | 2 | 1 |
| -<br>6.505E+18  | IsMasterProt<br>ein | A0A8C5A34<br>5 | Uncharacterized protein OS=Gadus morhua OX=8049 PE=3 SV=1                                                           | 4  | 3 | 4 | 3 | 757  | 85        | 8.48 | 8.72 | 3 | 1 |
| -<br>2.2339E+18 | IsMasterProt<br>ein | A0A8C5FBP<br>0 | Sortilin-related receptor OS=Gadus morhua OX=8049 GN=sorl1 PE=3<br>SV=1                                             | 3  | 3 | 3 | 3 | 2276 | 250.<br>6 | 5.88 | 8.69 | 3 | 1 |
| -<br>8.819E+18  | IsMasterProt<br>ein | A0A8C5BQP<br>1 | BAH domain and coiled-coil containing 1b OS=Gadus morhua OX=8049<br>GN=bahcc1b PE=4 SV=1                            | 2  | 2 | 3 | 2 | 2955 | 315       | 8.68 | 8.69 | 2 | 1 |
| -<br>8.501E+18  | IsMasterProt<br>ein | A0A8C5C0T<br>5 | Neurobeachin a OS=Gadus morhua OX=8049 PE=4 SV=1                                                                    | 3  | 3 | 3 | 2 | 2343 | 262.<br>1 | 6.71 | 8.69 | 3 | 1 |
| -<br>8.755E+18  | IsMasterProt<br>ein | A0A8C5AE2<br>3 | RAB11 binding and LisH domain, coiled-coil and HEAT repeat containing<br>OS=Gadus morhua OX=8049 GN=relch PE=4 SV=1 | 6  | 3 | 3 | 3 | 1155 | 128.<br>5 | 5.77 | 8.68 | 3 | 1 |
| -<br>2.479E+18  | IsMasterProt<br>ein | A0A8C5AVU<br>9 | Anion exchange protein OS=Gadus morhua OX=8049 GN=slc4a1b PE=3<br>SV=1                                              | 9  | 3 | 3 | 3 | 875  | 96.2      | 7.12 | 8.65 | 3 | 1 |
| -<br>3.8017E+18 | IsMasterProt<br>ein | A0A8C5C3W<br>2 | [Histone H3]-lysine(4) N-methyltransferase OS=Gadus morhua OX=8049<br>GN=KMT2C PE=4 SV=1                            | 1  | 3 | 3 | 3 | 6625 | 708.<br>1 | 6.47 | 8.64 | 3 | 1 |
| -<br>1.2992E+18 | IsMasterProt<br>ein | A0A8C5AYN<br>8 | THAP-type domain-containing protein OS=Gadus morhua OX=8049<br>PE=4 SV=1                                            | 8  | 3 | 6 | 3 | 578  | 66.1      | 9.55 | 8.61 | 3 | 1 |
| -<br>8.3327E+18 | IsMasterProt<br>ein | A0A8C5APZ<br>9 | Reverse transcriptase domain-containing protein OS=Gadus morhua<br>OX=8049 PE=4 SV=1                                | 6  | 3 | 4 | 2 | 1211 | 134.<br>8 | 9.23 | 8.6  | 3 | 1 |
| -<br>5.669E+18  | IsMasterProt<br>ein | A0A8C5B2L<br>4 | Guanylate cyclase OS=Gadus morhua OX=8049 GN=gucy2d PE=3 SV=1                                                       | 6  | 3 | 3 | 2 | 1175 | 130.<br>7 | 7.59 | 8.59 | 3 | 1 |
| -<br>5.4972E+18 | IsMasterProt<br>ein | A0A8C5FLN<br>7 | Ring finger protein 139 OS=Gadus morhua OX=8049 GN=rf139 PE=4<br>SV=1                                               | 7  | 2 | 3 | 2 | 683  | 74.7      | 6.79 | 8.59 | 2 | 1 |
| -<br>6.833E+18  | IsMasterProt<br>ein | A0A8C5C053     | Cytoskeleton-associated protein 5-like OS=Gadus morhua OX=8049<br>GN=LOC115558759 PE=3 SV=1                         | 4  | 3 | 3 | 3 | 1798 | 198.<br>4 | 8.34 | 8.58 | 3 | 1 |
| -<br>7.1754E+18 | IsMasterProt<br>ein | A0A8C4YYT<br>9 | ADAM metalloproteinase with thrombospondin type 1 motif, 1 OS=Gadus<br>morhua OX=8049 GN=adamts1 PE=4 SV=1          | 4  | 2 | 3 | 2 | 958  | 103.<br>6 | 6.95 | 8.56 | 2 | 1 |
| -<br>3.721E+18  | IsMasterProt<br>ein | A0A8C5AP9<br>4 | Elastin microfibril interfacer 2a OS=Gadus morhua OX=8049<br>GN=emilin2a PE=4 SV=1                                  | 3  | 2 | 3 | 2 | 1108 | 120.<br>8 | 6.96 | 8.55 | 2 | 1 |
| -<br>7.0228E+18 | IsMasterProt<br>ein | A0A8C5FUA<br>7 | Uncharacterized protein OS=Gadus morhua OX=8049 PE=3 SV=1                                                           | 2  | 3 | 3 | 3 | 3540 | 392.<br>8 | 7.85 | 8.54 | 3 | 1 |
| -<br>3.8187E+18 | IsMasterProt<br>ein | A0A8C5APQ<br>5 | PDZ domain-containing protein OS=Gadus morhua OX=8049 PE=4 SV=1                                                     | 25 | 2 | 3 | 2 | 209  | 22.6      | 9.41 | 8.53 | 2 | 1 |
| -<br>4.373E+18  | IsMasterProt<br>ein | A0A8C5C4H<br>9 | Fraser extracellular matrix complex subunit 1 OS=Gadus morhua<br>OX=8049 PE=3 SV=1                                  | 2  | 3 | 3 | 3 | 3953 | 432.<br>2 | 5.83 | 8.53 | 3 | 1 |
| -<br>2.548E+18  | IsMasterProt<br>ein | A0A8C5A81<br>7 | ADP-ribosylation factor GTPase activating protein 3 OS=Gadus morhua<br>OX=8049 PE=4 SV=1                            | 13 | 2 | 3 | 2 | 491  | 53.3      | 9.04 | 8.52 | 2 | 1 |
| -<br>2.453E+18  | IsMasterProt<br>ein | A0A8C5B317     | Tax1 (human T-cell leukemia virus type I) binding protein 1b OS=Gadus<br>morhua OX=8049 PE=4 SV=1                   | 4  | 2 | 3 | 2 | 794  | 91.2      | 5.31 | 8.5  | 2 | 1 |

|                |                 |            |                                                                                                                |    |   |   |   |      |       |      |      |   |   |
|----------------|-----------------|------------|----------------------------------------------------------------------------------------------------------------|----|---|---|---|------|-------|------|------|---|---|
| -<br>3.799E+18 | IsMasterProtein | A0A8C4ZNA1 | Guanine nucleotide binding protein (G protein), beta polypeptide 1b OS=Gadus morhua OX=8049 GN=gmb1b PE=3 SV=1 | 13 | 3 | 3 | 2 | 340  | 37.3  | 6    | 8.47 | 3 | 1 |
| -<br>8.874E+18 | IsMasterProtein | A0A8C5B0Z3 | Phospholipid-transporting ATPase OS=Gadus morhua OX=8049 PE=3 SV=1                                             | 5  | 3 | 3 | 3 | 1472 | 164.5 | 6.74 | 8.47 | 3 | 1 |
| -<br>9.025E+18 | IsMasterProtein | A0A8C4ZBA1 | Uncharacterized protein OS=Gadus morhua OX=8049 PE=4 SV=1                                                      | 11 | 3 | 4 | 3 | 640  | 69.1  | 9.29 | 8.45 | 3 | 1 |
| -<br>6.482E+18 | IsMasterProtein | A0A8C5B098 | Procollagen-proline 4-dioxygenase OS=Gadus morhua OX=8049 PE=3 SV=1                                            | 6  | 3 | 3 | 2 | 523  | 59.8  | 5.4  | 8.45 | 3 | 1 |
| -<br>6.945E+18 | IsMasterProtein | A0A8C5BZ26 | Ubiquitin carboxyl-terminal hydrolase OS=Gadus morhua OX=8049 GN=usp14 PE=3 SV=1                               | 10 | 3 | 3 | 3 | 447  | 50.3  | 5.1  | 8.44 | 3 | 1 |
| -<br>7.565E+18 | IsMasterProtein | A0A8C5AA45 | Uncharacterized protein OS=Gadus morhua OX=8049 PE=4 SV=1                                                      | 11 | 2 | 3 | 2 | 657  | 77.5  | 9.63 | 8.44 | 2 | 1 |
| 1.0146E+18     | IsMasterProtein | A0A8C5CXT4 | XPGN domain-containing protein OS=Gadus morhua OX=8049 PE=3 SV=1                                               | 5  | 2 | 3 | 2 | 484  | 54    | 7.59 | 8.44 | 2 | 1 |
| -<br>5.97E+18  | IsMasterProtein | A0A8C5ARY2 | E3 ubiquitin-protein ligase OS=Gadus morhua OX=8049 PE=3 SV=1                                                  | 11 | 3 | 3 | 2 | 791  | 87.4  | 6.47 | 8.43 | 3 | 1 |
| -<br>5.084E+18 | IsMasterProtein | A0A8C4ZZT8 | ATP-dependent DNA helicase OS=Gadus morhua OX=8049 PE=3 SV=1                                                   | 4  | 3 | 3 | 3 | 1979 | 226   | 7.74 | 8.43 | 3 | 1 |
| -<br>2.625E+18 | IsMasterProtein | A0A8C5CTZ0 | Niban apoptosis regulator 2b OS=Gadus morhua OX=8049 PE=3 SV=1                                                 | 11 | 3 | 3 | 3 | 742  | 83.5  | 5.3  | 8.43 | 3 | 1 |
| 5.9342E+18     | IsMasterProtein | A0A8C5F8B0 | Proprotein convertase subtilisin/kexin type 5a OS=Gadus morhua OX=8049 GN=psck5a PE=3 SV=1                     | 3  | 3 | 3 | 3 | 1975 | 211.5 | 5.54 | 8.43 | 3 | 1 |
| -<br>8.625E+18 | IsMasterProtein | A0A8C5FDY4 | Ankyrin repeat domain 52a OS=Gadus morhua OX=8049 GN=ankrd52a PE=4 SV=1                                        | 7  | 3 | 3 | 3 | 1036 | 111.1 | 6.86 | 8.42 | 3 | 1 |
| 6.4065E+18     | IsMasterProtein | A0A8C5CLP4 | Sodium/potassium-transporting ATPase subunit beta OS=Gadus morhua OX=8049 PE=3 SV=1                            | 14 | 3 | 3 | 3 | 302  | 34.5  | 8.91 | 8.42 | 3 | 1 |
| -<br>7.348E+18 | IsMasterProtein | A0A8C5FDF8 | F-actin-capping protein subunit beta OS=Gadus morhua OX=8049 GN=capzb PE=3 SV=1                                | 20 | 3 | 3 | 3 | 272  | 30.5  | 6.27 | 8.41 | 3 | 1 |
| -<br>2.463E+18 | IsMasterProtein | A0A8C5FX05 | Laminin subunit alpha 1 OS=Gadus morhua OX=8049 GN=LAMA1 PE=4 SV=1                                             | 3  | 3 | 3 | 3 | 2328 | 249.8 | 6.8  | 8.41 | 3 | 1 |
| 2.4023E+18     | IsMasterProtein | A0A8C5B6I2 | Myosin X, like 1 OS=Gadus morhua OX=8049 PE=3 SV=1                                                             | 4  | 3 | 3 | 3 | 1915 | 219.5 | 7.94 | 8.41 | 3 | 1 |
| 6.9908E+18     | IsMasterProtein | A0A8C4ZGC4 | Protein-tyrosine sulfotransferase OS=Gadus morhua OX=8049 GN=LOC115546870 PE=3 SV=1                            | 12 | 2 | 3 | 2 | 349  | 38.9  | 9.03 | 8.38 | 2 | 1 |
| -<br>1.161E+18 | IsMasterProtein | A0A8C5AG79 | Y box binding protein 1 OS=Gadus morhua OX=8049 PE=4 SV=1                                                      | 15 | 3 | 3 | 3 | 331  | 35.3  | 9.47 | 8.38 | 3 | 1 |
| 5.7569E+18     | IsMasterProtein | A0A8C5A1Q2 | Non-specific serine/threonine protein kinase OS=Gadus morhua OX=8049 GN=raf1a PE=3 SV=1                        | 12 | 3 | 3 | 3 | 596  | 67.5  | 9.44 | 8.37 | 3 | 1 |
| -<br>5.722E+17 | IsMasterProtein | A0A8C5AFF0 | TRMT1-like protein OS=Gadus morhua OX=8049 GN=trmt1l PE=3 SV=1                                                 | 9  | 3 | 3 | 3 | 688  | 75.8  | 7.55 | 8.37 | 3 | 1 |
| 3.3669E+18     | IsMasterProtein | A0A8C5CGW6 | Cullin-associated and neddylation-dissociated 1 OS=Gadus morhua OX=8049 GN=CAND1 PE=3 SV=1                     | 3  | 3 | 4 | 3 | 1236 | 136.8 | 5.81 | 8.37 | 3 | 1 |



|                |                 |            |                                                                                                                    |    |   |   |   |      |       |       |      |   |   |
|----------------|-----------------|------------|--------------------------------------------------------------------------------------------------------------------|----|---|---|---|------|-------|-------|------|---|---|
| -<br>2.831E+18 | IsMasterProtein | A0A8C5AC53 | Uncharacterized protein OS=Gadus morhua OX=8049 PE=4 SV=1                                                          | 4  | 3 | 3 | 3 | 1401 | 148.3 | 8.95  | 8.37 | 3 | 1 |
| 5.4873E+18     | IsMasterProtein | A0A8C5A7E6 | Leucine rich repeat and coiled-coil centrosomal protein 1 OS=Gadus morhua OX=8049 GN=lrcc1 PE=4 SV=1               | 5  | 3 | 3 | 3 | 1012 | 113.4 | 8.66  | 8.36 | 3 | 1 |
| -<br>8.651E+18 | IsMasterProtein | A0A8C5A0A2 | Glucosidase, alpha; neutral AB OS=Gadus morhua OX=8049 PE=3 SV=1                                                   | 2  | 2 | 3 | 2 | 903  | 102.9 | 6.43  | 8.35 | 2 | 1 |
| -<br>8.787E+18 | IsMasterProtein | A0A8C5FEU4 | Uncharacterized protein OS=Gadus morhua OX=8049 PE=4 SV=1                                                          | 4  | 3 | 3 | 3 | 2009 | 222   | 7.8   | 8.35 | 3 | 1 |
| -<br>5.93E+18  | IsMasterProtein | A0A8C4ZC13 | Rho guanine nucleotide exchange factor 17 OS=Gadus morhua OX=8049 GN=arhgef17 PE=4 SV=1                            | 2  | 3 | 3 | 3 | 2742 | 298.9 | 6.61  | 8.34 | 3 | 1 |
| 8.9836E+18     | IsMasterProtein | A0A8C4YX45 | Eukaryotic translation initiation factor 4E nuclear import factor 1 OS=Gadus morhua OX=8049 GN=EIF4ENIF1 PE=4 SV=1 | 5  | 2 | 3 | 2 | 799  | 88.4  | 6.61  | 8.34 | 2 | 1 |
| -<br>5.393E+18 | IsMasterProtein | A0A8C5D0K4 | Vesicle-fusing ATPase OS=Gadus morhua OX=8049 GN=vps4b PE=3 SV=1                                                   | 9  | 3 | 3 | 2 | 438  | 48.9  | 6.9   | 8.33 | 3 | 1 |
| 7.9979E+18     | IsMasterProtein | A0A8C5CJK0 | Histone H3 OS=Gadus morhua OX=8049 PE=3 SV=1                                                                       | 36 | 3 | 3 | 3 | 112  | 12.5  | 11.82 | 8.33 | 3 | 1 |
| -<br>4.172E+18 | IsMasterProtein | A0A8C4ZSR4 | CUPID domain-containing protein OS=Gadus morhua OX=8049 PE=4 SV=1                                                  | 9  | 3 | 3 | 3 | 751  | 80.8  | 8.57  | 8.33 | 3 | 1 |
| 1.3764E+18     | IsMasterProtein | A0A8C5BWK5 | Ganglioside induced differentiation associated protein 2 OS=Gadus morhua OX=8049 GN=gdap2 PE=3 SV=1                | 11 | 3 | 3 | 3 | 489  | 55.8  | 6.49  | 8.32 | 3 | 1 |
| -<br>7.123E+18 | IsMasterProtein | A0A8C5AEU7 | Myosin VIIAa OS=Gadus morhua OX=8049 PE=3 SV=1                                                                     | 3  | 3 | 3 | 3 | 2147 | 247.3 | 8.81  | 8.32 | 3 | 1 |
| -<br>1.532E+18 | IsMasterProtein | A0A8C5B4M0 | Gephyrin a OS=Gadus morhua OX=8049 GN=gphna PE=3 SV=1                                                              | 9  | 3 | 4 | 3 | 880  | 95.1  | 6.43  | 8.31 | 3 | 1 |
| 7.074E+17      | IsMasterProtein | A0A8C5F6V6 | Cell division cycle 20 homolog OS=Gadus morhua OX=8049 GN=cdc20 PE=3 SV=1                                          | 9  | 2 | 3 | 2 | 496  | 54.9  | 7.88  | 8.3  | 2 | 1 |
| 2.7949E+18     | IsMasterProtein | A0A8C5FT27 | Zinc finger protein 628 OS=Gadus morhua OX=8049 GN=znf628 PE=4 SV=1                                                | 6  | 3 | 3 | 3 | 1432 | 152.8 | 6.84  | 8.29 | 3 | 1 |
| 2.3547E+18     | IsMasterProtein | A0A8C4Z1D1 | 60S ribosomal protein L31 OS=Gadus morhua OX=8049 GN=LOC115541599 PE=3 SV=1                                        | 33 | 3 | 3 | 3 | 124  | 14.3  | 10.43 | 8.29 | 3 | 1 |
| -<br>9.22E+18  | IsMasterProtein | A0A8C5BJL2 | Tight junction protein 2a (zona occludens 2) OS=Gadus morhua OX=8049 GN=tip2a PE=3 SV=1                            | 3  | 3 | 3 | 3 | 1256 | 141   | 7.42  | 8.29 | 3 | 1 |
| 8.5336E+18     | IsMasterProtein | A0A8C5FJZ1 | Solute carrier family 2 member 2 OS=Gadus morhua OX=8049 GN=slc2a2 PE=3 SV=1                                       | 8  | 3 | 3 | 3 | 506  | 54.8  | 8.22  | 8.29 | 3 | 1 |
| 4.9666E+18     | IsMasterProtein | A0A8C5AKS8 | DNA helicase OS=Gadus morhua OX=8049 GN=chd4b PE=4 SV=1                                                            | 3  | 3 | 3 | 3 | 1927 | 218.5 | 6.37  | 8.29 | 3 | 1 |
| 5.2605E+18     | IsMasterProtein | A0A8C5A7V0 | Transient receptor potential cation channel, subfamily M, member 1a OS=Gadus morhua OX=8049 PE=4 SV=1              | 4  | 3 | 3 | 3 | 1479 | 167.2 | 7.5   | 8.28 | 3 | 1 |
| 5.2914E+18     | IsMasterProtein | A0A8C5BKC4 | Reverse transcriptase domain-containing protein OS=Gadus morhua OX=8049 PE=4 SV=1                                  | 6  | 3 | 3 | 3 | 1040 | 121.4 | 9.14  | 8.28 | 3 | 1 |
| 4.1483E+18     | IsMasterProtein | A0A8C5B0T2 | EMI domain containing 1 OS=Gadus morhua OX=8049 GN=emid1 PE=4 SV=1                                                 | 10 | 2 | 3 | 2 | 486  | 49.7  | 9.73  | 8.28 | 2 | 1 |
| -<br>1.723E+18 | IsMasterProtein | A0A8C5F855 | Lysozyme g OS=Gadus morhua OX=8049 GN=LOC115556755 PE=3 SV=1                                                       | 24 | 3 | 3 | 3 | 183  | 19.8  | 7.56  | 8.27 | 3 | 1 |
| -<br>5.385E+17 | IsMasterProtein | A0A8C5CHK4 | Golgi associated kinase 1A OS=Gadus morhua OX=8049 GN=gask1a PE=3 SV=1                                             | 7  | 3 | 3 | 3 | 723  | 79.8  | 10.14 | 8.26 | 3 | 1 |

|                |                 |            |                                                                                                         |    |   |   |   |      |       |      |      |   |   |
|----------------|-----------------|------------|---------------------------------------------------------------------------------------------------------|----|---|---|---|------|-------|------|------|---|---|
| -<br>6.386E+18 | IsMasterProtein | A0A8C4YZT8 | Acetyltransferase component of pyruvate dehydrogenase complex OS=Gadus morhua OX=8049 GN=DLAT PE=3 SV=1 | 4  | 2 | 3 | 2 | 639  | 67.2  | 8.18 | 8.25 | 2 | 1 |
| -<br>1.407E+18 | IsMasterProtein | A0A8C4ZUA4 | Inositol 1,4,5-trisphosphate receptor OS=Gadus morhua OX=8049 PE=3 SV=1                                 | 3  | 3 | 3 | 3 | 2653 | 302.3 | 6.34 | 8.25 | 3 | 1 |
| -<br>8.522E+18 | IsMasterProtein | A0A8C4Z2Y7 | MAP kinase-activating death domain protein OS=Gadus morhua OX=8049 GN=madd PE=3 SV=1                    | 3  | 3 | 3 | 3 | 1465 | 160.3 | 6.55 | 8.25 | 3 | 1 |
| -<br>8.045E+18 | IsMasterProtein | A0A8C5BCJ0 | Isoleucine--tRNA ligase OS=Gadus morhua OX=8049 PE=3 SV=1                                               | 5  | 3 | 3 | 3 | 1154 | 132.8 | 7.47 | 8.24 | 3 | 1 |
| -<br>6.346E+18 | IsMasterProtein | A0A8C5A8N9 | SET nuclear proto-oncogene a OS=Gadus morhua OX=8049 GN=seta PE=3 SV=1                                  | 12 | 3 | 3 | 3 | 271  | 31.2  | 4.36 | 8.24 | 3 | 1 |
| -<br>7.155E+18 | IsMasterProtein | A0A8C5BBC5 | SASA domain-containing protein OS=Gadus morhua OX=8049 PE=4 SV=1                                        | 6  | 3 | 3 | 3 | 544  | 60.1  | 6.84 | 8.23 | 3 | 1 |
| -<br>4.714E+18 | IsMasterProtein | A0A8C4YYC8 | ADP/ATP translocase OS=Gadus morhua OX=8049 GN=si:dkey-251i10.1 PE=3 SV=1                               | 7  | 3 | 3 | 3 | 298  | 32.7  | 9.79 | 8.23 | 3 | 1 |
| -<br>3.245E+18 | IsMasterProtein | A0A8C5FUY5 | Uncharacterized protein OS=Gadus morhua OX=8049 PE=4 SV=1                                               | 3  | 3 | 3 | 3 | 1679 | 185.6 | 6.15 | 8.22 | 3 | 1 |
| -<br>1.284E+18 | IsMasterProtein | A0A8C4Z2F9 | DZF domain-containing protein OS=Gadus morhua OX=8049 PE=4 SV=1                                         | 8  | 3 | 3 | 3 | 1027 | 111.5 | 9.01 | 8.22 | 3 | 1 |
| -<br>1.488E+18 | IsMasterProtein | A0A8C4ZI25 | KH homology domain-containing protein 4 OS=Gadus morhua OX=8049 PE=3 SV=1                               | 11 | 2 | 3 | 2 | 488  | 52.3  | 7.56 | 8.21 | 2 | 1 |
| -<br>6.111E+18 | IsMasterProtein | A0A8C5A4K3 | Membrane associated guanylate kinase, WW and PDZ domain containing 2b OS=Gadus morhua OX=8049 PE=4 SV=1 | 4  | 2 | 3 | 2 | 1269 | 138   | 5.97 | 8.21 | 2 | 1 |
| -<br>5.392E+18 | IsMasterProtein | A0A8C5A9Z8 | Glycine cleavage system P protein OS=Gadus morhua OX=8049 GN=glc PE=3 SV=1                              | 6  | 3 | 4 | 3 | 1045 | 115   | 7.44 | 8.21 | 3 | 1 |
| -<br>7.089E+18 | IsMasterProtein | A0A8C5BJ49 | Ubiquitin protein ligase E3 component n-recognin 5 OS=Gadus morhua OX=8049 GN=UBR5 PE=4 SV=1            | 2  | 3 | 3 | 3 | 2875 | 315.1 | 5.95 | 8.21 | 3 | 1 |
| -<br>9.076E+18 | IsMasterProtein | A0A8C5FNQ1 | Gamma-aminobutyric acid type A receptor subunit alpha4 OS=Gadus morhua OX=8049 GN=gabra4 PE=3 SV=1      | 9  | 2 | 3 | 2 | 567  | 62.1  | 9.57 | 8.19 | 2 | 1 |
| -<br>1.145E+18 | IsMasterProtein | A0A8C4Z3L4 | Serine--tRNA ligase OS=Gadus morhua OX=8049 PE=3 SV=1                                                   | 7  | 3 | 3 | 3 | 541  | 61.4  | 6.37 | 8.19 | 3 | 1 |
| -<br>1.461E+18 | IsMasterProtein | A0A8C5CXJ9 | Peptidase S1 domain-containing protein OS=Gadus morhua OX=8049 PE=4 SV=1                                | 14 | 2 | 3 | 2 | 199  | 21.8  | 8.6  | 8.19 | 2 | 1 |
| -<br>9.122E+18 | IsMasterProtein | A0A8C5A350 | Ig-like domain-containing protein OS=Gadus morhua OX=8049 PE=3 SV=1                                     | 13 | 3 | 3 | 2 | 300  | 34.3  | 4.74 | 8.18 | 3 | 1 |
| -<br>5.259E+17 | IsMasterProtein | A0A8C5BDE7 | Proline rich 12b OS=Gadus morhua OX=8049 PE=4 SV=1                                                      | 3  | 3 | 3 | 3 | 2312 | 246.5 | 6.74 | 8.18 | 3 | 1 |
| -<br>7.163E+18 | IsMasterProtein | A0A8C5FMG2 | ADAMTS-like 3 OS=Gadus morhua OX=8049 PE=4 SV=1                                                         | 4  | 3 | 3 | 3 | 1622 | 177.3 | 8.18 | 8.18 | 3 | 1 |
| -<br>3.881E+17 | IsMasterProtein | A0A8C5ANI5 | Calmodulin regulated spectrin-associated protein 1b OS=Gadus morhua OX=8049 GN=camsap1b PE=3 SV=1       | 5  | 3 | 3 | 2 | 1540 | 169.6 | 6.74 | 8.17 | 3 | 1 |

|                |                 |            |                                                                                              |    |   |   |   |      |       |      |      |   |   |
|----------------|-----------------|------------|----------------------------------------------------------------------------------------------|----|---|---|---|------|-------|------|------|---|---|
| -<br>8.376E+18 | IsMasterProtein | A0A8C5CFC5 | PDS5 cohesin associated factor B OS=Gadus morhua OX=8049 GN=pds5b PE=4 SV=1                  | 5  | 3 | 3 | 3 | 1167 | 132.9 | 8.25 | 8.17 | 3 | 1 |
| 9.8707E+17     | IsMasterProtein | A0A8C5C4P3 | Neurofibromin 1a OS=Gadus morhua OX=8049 PE=4 SV=1                                           | 3  | 3 | 3 | 3 | 2750 | 309.6 | 7.5  | 8.17 | 3 | 1 |
| -<br>4.047E+18 | IsMasterProtein | A0A8C5C0T3 | DNA ligase OS=Gadus morhua OX=8049 GN=lig3 PE=3 SV=1                                         | 4  | 2 | 3 | 2 | 1010 | 112.5 | 9.22 | 8.15 | 2 | 1 |
| -<br>5.66E+18  | IsMasterProtein | A0A8C5FMX0 | Protein-tyrosine-phosphatase OS=Gadus morhua OX=8049 PE=3 SV=1                               | 3  | 3 | 3 | 3 | 1928 | 213.8 | 6.65 | 8.14 | 3 | 1 |
| -<br>6.811E+16 | IsMasterProtein | A0A8C5BU39 | Golgin A4 OS=Gadus morhua OX=8049 GN=golga4 PE=4 SV=1                                        | 3  | 3 | 3 | 3 | 2107 | 242   | 5.38 | 8.14 | 3 | 1 |
| -<br>4.921E+18 | IsMasterProtein | A0A8C5AEC9 | Anion exchange protein OS=Gadus morhua OX=8049 PE=3 SV=1                                     | 5  | 3 | 3 | 3 | 1196 | 133.7 | 6.71 | 8.14 | 3 | 1 |
| 3.4298E+18     | IsMasterProtein | A0A8C4ZT75 | Uncharacterized protein OS=Gadus morhua OX=8049 PE=4 SV=1                                    | 7  | 3 | 3 | 3 | 676  | 76.3  | 5.9  | 8.14 | 3 | 1 |
| -<br>6.208E+18 | IsMasterProtein | A0A8C4ZEB4 | YEATS domain containing 2 OS=Gadus morhua OX=8049 GN=yeats2 PE=4 SV=1                        | 5  | 3 | 3 | 2 | 1417 | 148.3 | 9.11 | 8.13 | 3 | 1 |
| -<br>3.759E+18 | IsMasterProtein | A0A8C4ZT35 | Phosphoenolpyruvate carboxykinase (GTP) OS=Gadus morhua OX=8049 GN=pck1 PE=3 SV=1            | 6  | 2 | 3 | 2 | 624  | 68.6  | 6.09 | 8.13 | 2 | 1 |
| -<br>7.371E+18 | IsMasterProtein | A0A8C5AF14 | Uncharacterized protein OS=Gadus morhua OX=8049 PE=3 SV=1                                    | 5  | 3 | 3 | 3 | 1193 | 133.3 | 7.77 | 8.13 | 3 | 1 |
| 7.7649E+18     | IsMasterProtein | A0A8C5C4Z7 | Thyroid hormone receptor associated protein 3b OS=Gadus morhua OX=8049 GN=thrap3b PE=3 SV=1  | 6  | 3 | 4 | 3 | 942  | 104.5 | 10.3 | 8.12 | 3 | 1 |
| 2.0602E+18     | IsMasterProtein | A0A8C5D1A5 | Anillin, actin binding protein OS=Gadus morhua OX=8049 GN=ANLN PE=4 SV=1                     | 7  | 3 | 3 | 3 | 1246 | 134.3 | 8.97 | 8.12 | 3 | 1 |
| -<br>7.861E+18 | IsMasterProtein | A0A8C5C6Z0 | S-(hydroxymethyl)glutathione dehydrogenase OS=Gadus morhua OX=8049 GN=LOC115552326 PE=3 SV=1 | 10 | 3 | 3 | 3 | 372  | 39.5  | 6.83 | 8.12 | 3 | 1 |
| -<br>8.146E+18 | IsMasterProtein | A0A8C5BD93 | Cytoplasmic linker associated protein 2 OS=Gadus morhua OX=8049 GN=clasp2 PE=4 SV=1          | 2  | 2 | 3 | 2 | 1473 | 162.7 | 8.46 | 8.11 | 2 | 1 |
| -<br>3.837E+18 | IsMasterProtein | A0A8C5BJ59 | Protein Wnt OS=Gadus morhua OX=8049 GN=wnt9a PE=3 SV=1                                       | 12 | 3 | 3 | 3 | 424  | 47.8  | 8.9  | 8.11 | 3 | 1 |
| -<br>9.208E+18 | IsMasterProtein | A0A8C5D1H9 | Coiled-coil domain containing 85C, b OS=Gadus morhua OX=8049 GN=ccdc85cb PE=3 SV=1           | 14 | 3 | 4 | 3 | 417  | 47    | 7.47 | 8.11 | 3 | 1 |
| -<br>8.955E+18 | IsMasterProtein | A0A8C5BTZ8 | Acetyl-CoA carboxylase OS=Gadus morhua OX=8049 PE=4 SV=1                                     | 2  | 3 | 3 | 2 | 2282 | 255.5 | 6.71 | 8.1  | 3 | 1 |
| 6.9088E+18     | IsMasterProtein | A0A8C5FUV6 | Profilin OS=Gadus morhua OX=8049 GN=LOC115529555 PE=3 SV=1                                   | 21 | 3 | 3 | 3 | 150  | 16.5  | 6.55 | 8.1  | 3 | 1 |
| 2.1411E+18     | IsMasterProtein | A0A8C5C9K0 | Formimidoyltransferase-cyclodeaminase OS=Gadus morhua OX=8049 GN=ftcd PE=3 SV=1              | 10 | 3 | 3 | 3 | 546  | 58.3  | 6.39 | 8.09 | 3 | 1 |
| -<br>2.889E+18 | IsMasterProtein | A0A8C5BQV7 | F-box domain-containing protein OS=Gadus morhua OX=8049 PE=4 SV=1                            | 12 | 3 | 3 | 3 | 802  | 88.1  | 7.43 | 8.09 | 3 | 1 |
| 5.878E+18      | IsMasterProtein | A0A8C5A0G1 | Programmed cell death 11 OS=Gadus morhua OX=8049 PE=4 SV=1                                   | 7  | 3 | 3 | 3 | 886  | 95.8  | 8.51 | 8.08 | 3 | 1 |

|                    |                     |                |                                                                                                                |    |   |   |   |      |           |           |      |   |   |
|--------------------|---------------------|----------------|----------------------------------------------------------------------------------------------------------------|----|---|---|---|------|-----------|-----------|------|---|---|
| -<br>4.175E+1<br>8 | IsMasterProt<br>ein | A0A8C5B9U<br>7 | Uncharacterized LOC115534730 OS=Gadus morhua OX=8049<br>GN=LOC115534730 PE=4 SV=1                              | 2  | 3 | 3 | 3 | 4331 | 468.<br>2 | 4.59      | 8.07 | 3 | 1 |
| 8.9093E+<br>18     | IsMasterProt<br>ein | A0A8C5F4Z8     | Vacuolar protein sorting 13 homolog A OS=Gadus morhua OX=8049<br>GN=VPS13A PE=3 SV=1                           | 2  | 3 | 3 | 3 | 3191 | 357.<br>9 | 5.64      | 8.07 | 3 | 1 |
| -<br>4.181E+1<br>8 | IsMasterProt<br>ein | A0A8C5FUA<br>5 | Copine Vb OS=Gadus morhua OX=8049 PE=3 SV=1                                                                    | 5  | 3 | 3 | 2 | 534  | 59.3      | 5.24      | 8.06 | 3 | 1 |
| -<br>6.635E+1<br>8 | IsMasterProt<br>ein | A0A8C5CEH<br>0 | ATP-dependent RNA helicase SUPV3L1, mitochondrial OS=Gadus<br>morhua OX=8049 GN=supv3l1 PE=3 SV=1              | 9  | 3 | 3 | 3 | 773  | 85.6      | 7.96      | 8.06 | 3 | 1 |
| -<br>1.951E+1<br>8 | IsMasterProt<br>ein | A0A8C5CXQ<br>3 | Moesin-like OS=Gadus morhua OX=8049 GN=LOC115552234 PE=4<br>SV=1                                               | 10 | 3 | 3 | 2 | 497  | 58.5      | 8.88      | 8.05 | 3 | 1 |
| 3.4018E+<br>18     | IsMasterProt<br>ein | A0A8C5FAV<br>5 | BCL6 corepressor OS=Gadus morhua OX=8049 GN=bcor PE=4 SV=1                                                     | 3  | 3 | 3 | 3 | 1834 | 197.<br>7 | 7.27      | 8.04 | 3 | 1 |
| 2.7454E+<br>18     | IsMasterProt<br>ein | A0A8C5FEN<br>8 | SEC7 domain-containing protein OS=Gadus morhua OX=8049 PE=4<br>SV=1                                            | 3  | 3 | 3 | 3 | 2098 | 228.<br>5 | 6.39      | 8.04 | 3 | 1 |
| 1.9221E+<br>18     | IsMasterProt<br>ein | A0A8C5F3S6     | Coatomer subunit beta OS=Gadus morhua OX=8049 PE=4 SV=1                                                        | 4  | 2 | 3 | 2 | 955  | 107.<br>1 | 6         | 8.03 | 2 | 1 |
| -<br>1.968E+1<br>8 | IsMasterProt<br>ein | A0A8C5AL4<br>6 | Talin 2a OS=Gadus morhua OX=8049 PE=4 SV=1                                                                     | 2  | 3 | 3 | 3 | 2558 | 272.<br>5 | 5.73      | 8.02 | 3 | 1 |
| -<br>2.39E+18      | IsMasterProt<br>ein | A0A8C4ZFP<br>9 | Tubby-like protein OS=Gadus morhua OX=8049 GN=zmp:0000000711<br>PE=3 SV=1                                      | 8  | 2 | 3 | 2 | 445  | 49.4      | 5.39      | 8.02 | 2 | 1 |
| 7.1041E+<br>18     | IsMasterProt<br>ein | A0A8C5CU4<br>7 | Oxysterol-binding protein OS=Gadus morhua OX=8049 PE=3 SV=1                                                    | 6  | 2 | 3 | 2 | 722  | 81.9      | 7.28      | 8.02 | 2 | 1 |
| 7.5887E+<br>18     | IsMasterProt<br>ein | A0A8C5CC<br>W2 | Phostensin_N domain-containing protein OS=Gadus morhua OX=8049<br>PE=4 SV=1                                    | 15 | 3 | 3 | 3 | 375  | 41.1      | 10.5<br>8 | 8.02 | 3 | 1 |
| -<br>7.783E+1<br>8 | IsMasterProt<br>ein | A0A8C4Z8E<br>7 | Tight junction protein 3 OS=Gadus morhua OX=8049 GN=tjp3 PE=3<br>SV=1                                          | 11 | 3 | 3 | 3 | 690  | 77.3      | 9.47      | 8.01 | 3 | 1 |
| 7.8838E+<br>18     | IsMasterProt<br>ein | A0A8C5AIX<br>4 | Protein HIRA OS=Gadus morhua OX=8049 PE=3 SV=1                                                                 | 5  | 2 | 3 | 2 | 1000 | 109.<br>4 | 8.24      | 8    | 2 | 1 |
| 8.1256E+<br>18     | IsMasterProt<br>ein | A0A8C5FQB<br>0 | Pleckstrin homology domain interacting protein OS=Gadus morhua<br>OX=8049 GN=phip PE=4 SV=1                    | 3  | 3 | 3 | 3 | 1966 | 218.<br>8 | 6.61      | 8    | 3 | 1 |
| -<br>4.177E+1<br>8 | IsMasterProt<br>ein | A0A8C4Z3J8     | Ribitol-5-phosphate transferase OS=Gadus morhua OX=8049 GN=fktn<br>PE=3 SV=1                                   | 11 | 2 | 3 | 2 | 463  | 51.3      | 8.6       | 8    | 2 | 1 |
| 8.6589E+<br>18     | IsMasterProt<br>ein | A0A8C5BPZ<br>1 | Ig-like domain-containing protein OS=Gadus morhua OX=8049 PE=4<br>SV=1                                         | 31 | 3 | 3 | 2 | 109  | 11.6      | 8.09      | 7.99 | 3 | 1 |
| -<br>8.892E+1<br>8 | IsMasterProt<br>ein | A0A8C5BDS<br>2 | Uncharacterized protein OS=Gadus morhua OX=8049 PE=4 SV=1                                                      | 39 | 3 | 3 | 3 | 79   | 8.7       | 8.5       | 7.99 | 3 | 1 |
| -<br>8.344E+1<br>8 | IsMasterProt<br>ein | A0A8C5A4T<br>2 | Leucine rich repeat (in FLII) interacting protein 1a OS=Gadus morhua<br>OX=8049 GN=lrrflp1a PE=3 SV=1          | 3  | 3 | 3 | 3 | 1549 | 167.<br>7 | 4.58      | 7.99 | 3 | 1 |
| 8.1425E+<br>18     | IsMasterProt<br>ein | A0A8C4YXZ<br>8 | Proteasome 20S subunit alpha 8 OS=Gadus morhua OX=8049<br>GN=PSMA8 PE=3 SV=1                                   | 19 | 3 | 3 | 3 | 232  | 26.3      | 9.07      | 7.99 | 3 | 1 |
| -<br>3.894E+1<br>8 | IsMasterProt<br>ein | A0A8C4ZTS<br>3 | Uncharacterized protein OS=Gadus morhua OX=8049 PE=4 SV=1                                                      | 5  | 3 | 3 | 3 | 1609 | 178       | 6.23      | 7.97 | 3 | 1 |
| 1.474E+1<br>8      | IsMasterProt<br>ein | A0A8C4YZ5<br>7 | Uveal autoantigen with coiled-coil domains and ankyrin repeats b<br>OS=Gadus morhua OX=8049 GN=uacab PE=4 SV=1 | 3  | 3 | 3 | 2 | 1325 | 149.<br>2 | 5.8       | 7.97 | 3 | 1 |
| -<br>2.304E+1<br>8 | IsMasterProt<br>ein | A0A8C5FMD<br>7 | Neuronal pentraxin receptor b OS=Gadus morhua OX=8049 PE=4 SV=1                                                | 8  | 2 | 3 | 2 | 600  | 63.8      | 5.71      | 7.95 | 2 | 1 |

|            |                 |            |                                                                                                    |    |   |   |   |      |       |      |      |   |   |
|------------|-----------------|------------|----------------------------------------------------------------------------------------------------|----|---|---|---|------|-------|------|------|---|---|
| 7.8349E+17 | IsMasterProtein | A0A8C5FKR3 | Neurexin 3a OS=Gadus morhua OX=8049 PE=3 SV=1                                                      | 4  | 3 | 3 | 3 | 1590 | 172.7 | 6.18 | 7.95 | 3 | 1 |
| -2.957E+18 | IsMasterProtein | A0A8C5CZ03 | Up-regulator of cell proliferation-like OS=Gadus morhua OX=8049 GN=LOC115529622 PE=3 SV=1          | 2  | 2 | 3 | 2 | 1580 | 181.8 | 6.49 | 7.95 | 2 | 1 |
| -9.1E+18   | IsMasterProtein | A0A8C5AAI9 | Protein kinase C OS=Gadus morhua OX=8049 GN=si:ch73-374I24.1 PE=3 SV=1                             | 10 | 3 | 3 | 3 | 659  | 75.9  | 7.71 | 7.94 | 3 | 1 |
| -9.045E+18 | IsMasterProtein | A0A8C4ZRH8 | AMOP domain-containing protein OS=Gadus morhua OX=8049 PE=4 SV=1                                   | 25 | 3 | 3 | 2 | 164  | 18.8  | 6.96 | 7.94 | 3 | 1 |
| -6.362E+18 | IsMasterProtein | A0A8C5FWL6 | Vacuolar protein sorting 13 homolog B OS=Gadus morhua OX=8049 GN=VPS13B PE=3 SV=1                  | 2  | 3 | 3 | 3 | 3885 | 426.8 | 6.3  | 7.94 | 3 | 1 |
| -8.758E+18 | IsMasterProtein | A0A8C4ZPQ4 | Protein-glucosylgalactosylhydroxyllysine glucosidase OS=Gadus morhua OX=8049 PE=4 SV=1             | 7  | 3 | 3 | 3 | 690  | 77.1  | 5.25 | 7.94 | 3 | 1 |
| -1.983E+18 | IsMasterProtein | A0A8C5BTK8 | Pleckstrin homology domain containing A5 OS=Gadus morhua OX=8049 GN=PLEKHA5 PE=4 SV=1              | 6  | 3 | 3 | 3 | 1181 | 131.8 | 7.64 | 7.93 | 3 | 1 |
| 6.5858E+18 | IsMasterProtein | A0A8C4Z9D7 | Vacuolar protein sorting 13 homolog D OS=Gadus morhua OX=8049 PE=3 SV=1                            | 2  | 3 | 3 | 3 | 4368 | 484.9 | 6.43 | 7.93 | 3 | 1 |
| 1.7419E+18 | IsMasterProtein | A0A8C5C323 | Stromal interaction molecule 2-like OS=Gadus morhua OX=8049 GN=LOC115540702 PE=4 SV=1              | 8  | 3 | 3 | 3 | 970  | 109.3 | 6.95 | 7.93 | 3 | 1 |
| -4.897E+18 | IsMasterProtein | A0A8C4ZCJ5 | Reactive oxygen species modulator 1 OS=Gadus morhua OX=8049 GN=romo1 PE=3 SV=1                     | 72 | 3 | 4 | 3 | 81   | 8.4   | 9.79 | 7.9  | 3 | 1 |
| 1.0018E+18 | IsMasterProtein | A0A8C5FS01 | Protein phosphatase 1 regulatory subunit 29-like OS=Gadus morhua OX=8049 GN=LOC115535811 PE=4 SV=1 | 4  | 3 | 3 | 3 | 968  | 106.6 | 7.88 | 7.9  | 3 | 1 |
| -1.008E+18 | IsMasterProtein | A0A8C4ZUG6 | Protein S100 OS=Gadus morhua OX=8049 GN=LOC115535334 PE=3 SV=1                                     | 24 | 2 | 3 | 2 | 90   | 10.3  | 5.5  | 7.9  | 2 | 1 |
| -1.284E+18 | IsMasterProtein | A0A8C4YU52 | PDZ and LIM domain protein 3-like OS=Gadus morhua OX=8049 GN=LOC115540147 PE=4 SV=1                | 8  | 2 | 3 | 2 | 399  | 43.2  | 7.12 | 7.9  | 2 | 1 |
| -8.039E+18 | IsMasterProtein | A0A8C5FUZ6 | Uncharacterized protein OS=Gadus morhua OX=8049 PE=4 SV=1                                          | 5  | 3 | 3 | 2 | 1156 | 128.5 | 5.91 | 7.9  | 3 | 1 |
| -9.076E+18 | IsMasterProtein | A0A8C5CEV4 | Serine peptidase inhibitor, Kunitz type 1 b OS=Gadus morhua OX=8049 PE=4 SV=1                      | 8  | 3 | 3 | 3 | 499  | 54.4  | 5.44 | 7.89 | 3 | 1 |
| 3.6313E+18 | IsMasterProtein | A0A8C4ZAZ5 | Uncharacterized protein OS=Gadus morhua OX=8049 PE=4 SV=1                                          | 5  | 3 | 3 | 3 | 1132 | 121.7 | 9.6  | 7.89 | 3 | 1 |
| 1.3991E+18 | IsMasterProtein | A0A8C5F6V2 | Fatty acid binding protein 3, muscle and heart OS=Gadus morhua OX=8049 GN=fabp3 PE=3 SV=1          | 12 | 2 | 3 | 2 | 203  | 22.2  | 6.54 | 7.88 | 2 | 1 |
| -7.854E+18 | IsMasterProtein | A0A8C4Z4A2 | Selenium binding protein 1 OS=Gadus morhua OX=8049 PE=3 SV=1                                       | 9  | 3 | 3 | 3 | 454  | 50.5  | 6.14 | 7.88 | 3 | 1 |
| -4.717E+18 | IsMasterProtein | A0A8C5A210 | Melanophilin b OS=Gadus morhua OX=8049 PE=4 SV=1                                                   | 10 | 3 | 3 | 3 | 637  | 72    | 6.02 | 7.88 | 3 | 1 |
| 3.2722E+18 | IsMasterProtein | A0A8C4YY62 | Uncharacterized protein OS=Gadus morhua OX=8049 PE=4 SV=1                                          | 7  | 2 | 3 | 2 | 666  | 74    | 6.04 | 7.87 | 2 | 1 |
| -3.374E+18 | IsMasterProtein | A0A8C5AZA1 | ATP-binding cassette, sub-family A (ABC1), member 5 OS=Gadus morhua OX=8049 GN=abca5 PE=4 SV=1     | 3  | 2 | 3 | 2 | 1349 | 148.1 | 7.97 | 7.86 | 2 | 1 |
| -5.29E+18  | IsMasterProtein | A0A8C5B053 | Uncharacterized protein OS=Gadus morhua OX=8049 PE=4 SV=1                                          | 1  | 3 | 3 | 3 | 7121 | 788.8 | 5.29 | 7.86 | 3 | 1 |

|                |                 |            |                                                                                                                |    |   |   |   |      |       |       |      |   |   |
|----------------|-----------------|------------|----------------------------------------------------------------------------------------------------------------|----|---|---|---|------|-------|-------|------|---|---|
| 1.3402E+17     | IsMasterProtein | A0A8C4Z9A3 | FRAS1 related extracellular matrix 2a OS=Gadus morhua OX=8049 PE=3 SV=1                                        | 2  | 3 | 3 | 3 | 3101 | 341.7 | 4.79  | 7.85 | 3 | 1 |
| -<br>8.117E+17 | IsMasterProtein | A0A8C4YY52 | Uncharacterized protein OS=Gadus morhua OX=8049 PE=3 SV=1                                                      | 21 | 3 | 3 | 3 | 149  | 16.8  | 10.23 | 7.85 | 3 | 1 |
| -<br>1.684E+18 | IsMasterProtein | A0A8C5BM96 | Uncharacterized protein OS=Gadus morhua OX=8049 PE=4 SV=1                                                      | 9  | 3 | 3 | 3 | 739  | 79    | 4.51  | 7.85 | 3 | 1 |
| -<br>5.621E+16 | IsMasterProtein | A0A8C5FBE7 | Mucin-12-like OS=Gadus morhua OX=8049 GN=LOC115551004 PE=4 SV=1                                                | 3  | 3 | 3 | 3 | 2040 | 222.3 | 9.72  | 7.84 | 3 | 1 |
| -<br>5.496E+18 | IsMasterProtein | A0A8C5CQW8 | Obscurin like cytoskeletal adaptor 1b OS=Gadus morhua OX=8049 PE=4 SV=1                                        | 2  | 3 | 3 | 3 | 3354 | 371.6 | 5.25  | 7.84 | 3 | 1 |
| -<br>2.99E+18  | IsMasterProtein | A0A8C4Z551 | RAB5B, member RAS oncogene family OS=Gadus morhua OX=8049 GN=rab5b PE=4 SV=1                                   | 13 | 2 | 3 | 2 | 216  | 23.8  | 7.37  | 7.84 | 2 | 1 |
| 1.0779E+18     | IsMasterProtein | A0A8C5ABM8 | Ribonuclease H OS=Gadus morhua OX=8049 PE=3 SV=1                                                               | 4  | 3 | 3 | 3 | 1589 | 179.8 | 9.01  | 7.84 | 3 | 1 |
| -<br>7.882E+18 | IsMasterProtein | A0A8C5C6T1 | Unc-45 myosin chaperone A OS=Gadus morhua OX=8049 PE=4 SV=1                                                    | 4  | 2 | 3 | 2 | 915  | 100.3 | 6.38  | 7.83 | 2 | 1 |
| -<br>6.491E+18 | IsMasterProtein | A0A8C5C2M7 | KH domain-containing protein OS=Gadus morhua OX=8049 PE=4 SV=1                                                 | 3  | 3 | 3 | 3 | 2278 | 240.5 | 6.62  | 7.82 | 3 | 1 |
| -<br>2.606E+18 | IsMasterProtein | A0A8C5BNR5 | Ubiquitinyl hydrolase 1 OS=Gadus morhua OX=8049 GN=USP34 PE=3 SV=1                                             | 2  | 3 | 3 | 3 | 3472 | 390.7 | 5.9   | 7.82 | 3 | 1 |
| -<br>7.922E+18 | IsMasterProtein | A0A8C4ZJP5 | L-lactate dehydrogenase OS=Gadus morhua OX=8049 PE=3 SV=1                                                      | 9  | 3 | 3 | 2 | 333  | 36.5  | 6.99  | 7.82 | 3 | 1 |
| -<br>6.347E+18 | IsMasterProtein | A0A8C5CQB4 | Serine/threonine-protein kinase TOR OS=Gadus morhua OX=8049 PE=3 SV=1                                          | 2  | 3 | 3 | 3 | 2471 | 280.3 | 6.9   | 7.81 | 3 | 1 |
| -<br>8.926E+18 | IsMasterProtein | A0A8C5BN40 | Thyroid hormone receptor associated protein 3a OS=Gadus morhua OX=8049 GN=thrap3a PE=3 SV=1                    | 6  | 3 | 3 | 3 | 911  | 100   | 9.79  | 7.81 | 3 | 1 |
| -<br>1.949E+18 | IsMasterProtein | A0A8C5CN89 | Neurofascin homolog (chicken) a OS=Gadus morhua OX=8049 PE=3 SV=1                                              | 3  | 2 | 3 | 2 | 1169 | 129.2 | 7.12  | 7.79 | 2 | 1 |
| 1.9795E+18     | IsMasterProtein | A0A8C4Z231 | Thioredoxin-disulfide reductase OS=Gadus morhua OX=8049 PE=3 SV=1                                              | 7  | 3 | 3 | 3 | 603  | 66.4  | 5.99  | 7.78 | 3 | 1 |
| -<br>6.669E+18 | IsMasterProtein | A0A8C5AL05 | Calcium dependent secretion activator 2 OS=Gadus morhua OX=8049 GN=CADPS2 PE=4 SV=1                            | 3  | 2 | 3 | 2 | 1277 | 143.9 | 6.07  | 7.78 | 2 | 1 |
| -<br>8.597E+18 | IsMasterProtein | A0A8C5ALI4 | Plakophilin 3b OS=Gadus morhua OX=8049 PE=3 SV=1                                                               | 11 | 3 | 3 | 3 | 836  | 90.7  | 8.73  | 7.78 | 3 | 1 |
| -<br>5.239E+18 | IsMasterProtein | A0A8C5CAM8 | Nicalin OS=Gadus morhua OX=8049 PE=3 SV=1                                                                      | 7  | 2 | 3 | 2 | 569  | 64.3  | 7.96  | 7.78 | 2 | 1 |
| -<br>5.245E+18 | IsMasterProtein | A0A8C5FPC3 | Retinal-specific phospholipid-transporting ATPase ABCA4-like OS=Gadus morhua OX=8049 GN=LOC115548542 PE=4 SV=1 | 2  | 3 | 3 | 3 | 2203 | 248.6 | 6.51  | 7.78 | 3 | 1 |
| -<br>3.871E+18 | IsMasterProtein | A0A8C5C8A8 | Uncharacterized protein OS=Gadus morhua OX=8049 PE=4 SV=1                                                      | 7  | 2 | 3 | 2 | 578  | 65    | 5.83  | 7.77 | 2 | 1 |



|                |                 |             |                                                                                              |    |   |   |   |      |       |       |      |   |   |
|----------------|-----------------|-------------|----------------------------------------------------------------------------------------------|----|---|---|---|------|-------|-------|------|---|---|
| -<br>2.838E+18 | IsMasterProtein | A0A8C5CWJ2  | Ras-related protein rab7 OS=Gadus morhua OX=8049 GN=LOC115556538 PE=4 SV=1                   | 18 | 3 | 3 | 3 | 207  | 23.6  | 6.7   | 7.77 | 3 | 1 |
| -<br>1.139E+18 | IsMasterProtein | A0A8C5C4Q5  | Parvalbumin OS=Gadus morhua OX=8049 GN=pvalb8 PE=3 SV=1                                      | 18 | 3 | 3 | 3 | 114  | 12.3  | 4.82  | 7.75 | 3 | 1 |
| 6.481E+18      | IsMasterProtein | A0A8C5BJG8  | Cadherin 4 OS=Gadus morhua OX=8049 GN=CDH4 PE=4 SV=1                                         | 5  | 2 | 3 | 2 | 904  | 99.5  | 5.25  | 7.75 | 2 | 1 |
| -<br>9.008E+18 | IsMasterProtein | A0A8C4ZT27  | RNA binding motif protein 15 OS=Gadus morhua OX=8049 PE=3 SV=1                               | 7  | 3 | 3 | 3 | 795  | 87.1  | 9.83  | 7.75 | 3 | 1 |
| -<br>4.59E+18  | IsMasterProtein | A0A8C5BUJ1  | RPTOR independent companion of MTOR complex 2 OS=Gadus morhua OX=8049 GN=rictor PE=3 SV=1    | 4  | 3 | 3 | 3 | 1695 | 188.2 | 7.08  | 7.74 | 3 | 1 |
| -<br>1.151E+18 | IsMasterProtein | A0A8C4ZDA2  | Envoplakin b OS=Gadus morhua OX=8049 GN=evplb PE=4 SV=1                                      | 3  | 3 | 3 | 3 | 2032 | 233.8 | 6.32  | 7.74 | 3 | 1 |
| -<br>5.883E+18 | IsMasterProtein | A0A8C4YXM1  | 60S ribosomal protein L13 OS=Gadus morhua OX=8049 PE=3 SV=1                                  | 13 | 3 | 3 | 3 | 234  | 26.7  | 11.44 | 7.74 | 3 | 1 |
| 7.187E+18      | IsMasterProtein | A0A8C4Z208  | RNA helicase OS=Gadus morhua OX=8049 PE=3 SV=1                                               | 10 | 3 | 3 | 3 | 649  | 70.7  | 7.15  | 7.73 | 3 | 1 |
| -<br>2.37E+17  | IsMasterProtein | A0A8C5BNM2  | Uncharacterized protein OS=Gadus morhua OX=8049 PE=4 SV=1                                    | 5  | 3 | 3 | 3 | 1209 | 135   | 6.34  | 7.73 | 3 | 1 |
| -<br>2.269E+18 | IsMasterProtein | A0A8C5BA71  | IST1 homolog OS=Gadus morhua OX=8049 PE=3 SV=1                                               | 8  | 3 | 3 | 3 | 474  | 52    | 7.88  | 7.72 | 3 | 1 |
| -<br>7.47E+18  | IsMasterProtein | A0A8C5FBZ4  | Leucine rich pentatricopeptide repeat containing OS=Gadus morhua OX=8049 GN=LRPPRC PE=4 SV=1 | 4  | 2 | 3 | 2 | 1281 | 143.2 | 6.77  | 7.72 | 2 | 1 |
| 1.319E+18      | IsMasterProtein | A0A8C5C076  | RNA helicase OS=Gadus morhua OX=8049 GN=dhx38 PE=4 SV=1                                      | 5  | 3 | 3 | 3 | 1215 | 137.5 | 6.42  | 7.72 | 3 | 1 |
| -<br>4.698E+18 | IsMasterProtein | A0A8C5AK20  | Cell adhesion molecule L1-like b OS=Gadus morhua OX=8049 GN=chl1b PE=3 SV=1                  | 3  | 3 | 3 | 3 | 1139 | 126.7 | 6.48  | 7.72 | 3 | 1 |
| -<br>7.352E+18 | IsMasterProtein | A0A8C4ZEL1  | 60S ribosomal protein L6 OS=Gadus morhua OX=8049 GN=rp16 PE=3 SV=1                           | 12 | 3 | 3 | 3 | 261  | 29.7  | 10.98 | 7.72 | 3 | 1 |
| -<br>2.448E+17 | IsMasterProtein | A0A8C5C480  | Protein phosphatase 1 regulatory subunit 21 OS=Gadus morhua OX=8049 GN=ppp1r21 PE=4 SV=1     | 6  | 3 | 3 | 3 | 712  | 79.9  | 7.34  | 7.72 | 3 | 1 |
| 1.08E+17       | IsMasterProtein | A0A8C5B9U0  | PHD finger protein 20, a OS=Gadus morhua OX=8049 GN=phf20a PE=4 SV=1                         | 5  | 3 | 3 | 3 | 1074 | 121   | 7.14  | 7.71 | 3 | 1 |
| 3.724E+18      | IsMasterProtein | A0A8C5AR88  | Syntaxin binding protein 1a OS=Gadus morhua OX=8049 GN=stxbp1a PE=3 SV=1                     | 9  | 3 | 3 | 3 | 572  | 65    | 6.23  | 7.71 | 3 | 1 |
| -<br>6.906E+18 | IsMasterProtein | A0A8C4Z3B3  | Uncharacterized protein OS=Gadus morhua OX=8049 PE=3 SV=1                                    | 5  | 3 | 3 | 3 | 452  | 51.1  | 6.67  | 7.7  | 3 | 1 |
| 1.481E+18      | IsMasterProtein | A0A8C5BYX4  | Msx2-interacting protein-like OS=Gadus morhua OX=8049 GN=SPEN PE=3 SV=1                      | 2  | 3 | 3 | 3 | 3248 | 359.5 | 7.11  | 7.7  | 3 | 1 |
| 4.058E+18      | IsMasterProtein | cRAP_Q06830 | Peroxisiredoxin-1 OS=Homo sapiens GN=PRDX1 PE=1 SV=1                                         | 22 | 2 | 3 | 2 | 199  | 22.1  | 8.13  | 7.7  | 2 | 1 |
| 6.071E+18      | IsMasterProtein | A0A8C4ZL48  | Small monomeric GTPase OS=Gadus morhua OX=8049 GN=LOC115542383 PE=3 SV=1                     | 17 | 3 | 3 | 3 | 198  | 22.3  | 5.83  | 7.69 | 3 | 1 |
| 3.189E+18      | IsMasterProtein | A0A8C4ZYF2  | E3 ubiquitin-protein ligase Topors-like OS=Gadus morhua OX=8049 GN=LOC115529975 PE=4 SV=1    | 6  | 3 | 3 | 3 | 1181 | 126.6 | 8.44  | 7.68 | 3 | 1 |
| 4.084E+18      | IsMasterProtein | A0A8C5FFG9  | Uncharacterized protein OS=Gadus morhua OX=8049 PE=4 SV=1                                    | 13 | 3 | 3 | 3 | 257  | 28.8  | 9.66  | 7.68 | 3 | 1 |

|                |                 |            |                                                                                                             |    |   |   |   |      |       |      |      |   |   |
|----------------|-----------------|------------|-------------------------------------------------------------------------------------------------------------|----|---|---|---|------|-------|------|------|---|---|
| -<br>2.127E+18 | IsMasterProtein | A0A8C4ZMW7 | Non-specific serine/threonine protein kinase OS=Gadus morhua OX=8049 GN=dapk1 PE=4 SV=1                     | 2  | 2 | 3 | 2 | 1420 | 157   | 7.14 | 7.68 | 2 | 1 |
| -<br>1.935E+17 | IsMasterProtein | A0A8C5FS79 | Uncharacterized protein OS=Gadus morhua OX=8049 PE=4 SV=1                                                   | 2  | 2 | 3 | 2 | 960  | 104.7 | 7.02 | 7.68 | 2 | 1 |
| 9.0147E+18     | IsMasterProtein | A0A8C5FVY7 | Potassium voltage-gated channel subfamily B member 1-like OS=Gadus morhua OX=8049 GN=LOC115557031 PE=4 SV=1 | 8  | 3 | 3 | 3 | 828  | 91    | 7.49 | 7.68 | 3 | 1 |
| -<br>8.411E+18 | IsMasterProtein | A0A8C5ARY6 | Protein kinase C OS=Gadus morhua OX=8049 GN=prkd4 PE=3 SV=1                                                 | 6  | 3 | 3 | 3 | 845  | 93.9  | 7.87 | 7.67 | 3 | 1 |
| -<br>8.857E+18 | IsMasterProtein | A0A8C5BUY8 | Calcium-transporting ATPase OS=Gadus morhua OX=8049 GN=atp2a3 PE=3 SV=1                                     | 5  | 3 | 3 | 3 | 1000 | 109.7 | 5.58 | 7.67 | 3 | 1 |
| -<br>3.903E+18 | IsMasterProtein | A0A8C5CMP3 | 60S ribosomal protein L8 OS=Gadus morhua OX=8049 GN=rpl8 PE=3 SV=1                                          | 18 | 3 | 3 | 3 | 148  | 16.2  | 11.8 | 7.67 | 3 | 1 |
| -<br>6.208E+18 | IsMasterProtein | A0A8C5ALD5 | Ryanodine receptor 2 OS=Gadus morhua OX=8049 GN=RYP2 PE=4 SV=1                                              | 1  | 3 | 3 | 3 | 4776 | 540.1 | 6.33 | 7.67 | 3 | 1 |
| 3.7021E+18     | IsMasterProtein | A0A8C5FX72 | DNA-directed DNA polymerase OS=Gadus morhua OX=8049 PE=3 SV=1                                               | 3  | 3 | 3 | 3 | 2137 | 234   | 6.76 | 7.67 | 3 | 1 |
| -<br>2.22E+18  | IsMasterProtein | A0A8C5F7J2 | Uncharacterized protein OS=Gadus morhua OX=8049 PE=4 SV=1                                                   | 10 | 3 | 3 | 3 | 595  | 66.7  | 5.03 | 7.67 | 3 | 1 |
| -<br>7.532E+18 | IsMasterProtein | A0A8C5FRE8 | RING-type E3 ubiquitin transferase OS=Gadus morhua OX=8049 GN=ttc3 PE=4 SV=1                                | 3  | 3 | 3 | 3 | 1691 | 191.2 | 7.75 | 7.66 | 3 | 1 |
| 5.0889E+18     | IsMasterProtein | A0A8C4YX43 | Fras1 related extracellular matrix 1a OS=Gadus morhua OX=8049 PE=3 SV=1                                     | 2  | 3 | 3 | 3 | 2077 | 227.6 | 5.9  | 7.65 | 3 | 1 |
| -<br>3.848E+18 | IsMasterProtein | A0A8C5FXT6 | TELO2 interacting protein 1 OS=Gadus morhua OX=8049 GN=tti1 PE=4 SV=1                                       | 4  | 2 | 3 | 2 | 1158 | 123.7 | 5.88 | 7.64 | 2 | 1 |
| 1.4986E+18     | IsMasterProtein | A0A8C4ZHA0 | Kinesin family member 11 OS=Gadus morhua OX=8049 GN=kif11 PE=3 SV=1                                         | 5  | 3 | 3 | 3 | 1019 | 114.7 | 5.73 | 7.64 | 3 | 1 |
| 9.1902E+18     | IsMasterProtein | A0A8C5C630 | Enhancer of mRNA-decapping protein 4 OS=Gadus morhua OX=8049 GN=edc4 PE=3 SV=1                              | 5  | 3 | 3 | 3 | 1280 | 139.9 | 6.16 | 7.64 | 3 | 1 |
| -<br>7.984E+18 | IsMasterProtein | A0A8C4ZZD5 | Procollagen-lysine 5-dioxygenase OS=Gadus morhua OX=8049 GN=PLOD1 PE=4 SV=1                                 | 7  | 3 | 3 | 3 | 734  | 83.8  | 6.86 | 7.63 | 3 | 1 |
| 8.8085E+17     | IsMasterProtein | A0A8C5CU48 | Vacuolar proton pump subunit B OS=Gadus morhua OX=8049 GN=atp6v1ba PE=3 SV=1                                | 9  | 3 | 3 | 2 | 503  | 55.8  | 5.57 | 7.63 | 3 | 1 |
| -<br>6.837E+18 | IsMasterProtein | A0A8C5BBY0 | Uncharacterized protein OS=Gadus morhua OX=8049 PE=3 SV=1                                                   | 2  | 3 | 3 | 3 | 3661 | 414.2 | 6.19 | 7.63 | 3 | 1 |
| -<br>1.998E+18 | IsMasterProtein | A0A8C5FWD3 | Chromosome 2 C16orf89 homolog OS=Gadus morhua OX=8049 GN=C16orf89 PE=4 SV=1                                 | 10 | 3 | 3 | 3 | 365  | 40.9  | 6.37 | 7.62 | 3 | 1 |
| -<br>8.144E+18 | IsMasterProtein | A0A8C4Z2Y9 | Profilin OS=Gadus morhua OX=8049 GN=LOC115555837 PE=3 SV=1                                                  | 30 | 3 | 3 | 3 | 139  | 15    | 6.54 | 7.62 | 3 | 1 |
| -<br>7.204E+18 | IsMasterProtein | A0A8C4ZM71 | Neurofibromin 2a (merlin) OS=Gadus morhua OX=8049 GN=nf2a PE=4 SV=1                                         | 9  | 3 | 3 | 3 | 559  | 65.5  | 6.42 | 7.62 | 3 | 1 |
| -<br>8.987E+18 | IsMasterProtein | A0A8C5CHM0 | Ligand dependent nuclear receptor corepressor-like OS=Gadus morhua OX=8049 GN=Icorl PE=4 SV=1               | 3  | 3 | 3 | 3 | 1942 | 213.6 | 8.87 | 7.6  | 3 | 1 |

|            |                 |            |                                                                                               |    |   |   |   |      |       |      |      |   |   |
|------------|-----------------|------------|-----------------------------------------------------------------------------------------------|----|---|---|---|------|-------|------|------|---|---|
| 1.1246E+18 | IsMasterProtein | A0A8C5B659 | Rho GTPase activating protein 21 OS=Gadus morhua OX=8049 GN=arhgap21 PE=4 SV=1                | 1  | 2 | 3 | 2 | 1939 | 206.2 | 8.51 | 7.6  | 2 | 1 |
| 6.119E+18  | IsMasterProtein | A0A8C5BQ43 | Uncharacterized protein OS=Gadus morhua OX=8049 PE=3 SV=1                                     | 3  | 3 | 3 | 3 | 1919 | 211.5 | 6.13 | 7.6  | 3 | 1 |
| 7.792E+18  | IsMasterProtein | A0A8C4ZY09 | Nitrilase 1 OS=Gadus morhua OX=8049 GN=nit1 PE=3 SV=1                                         | 12 | 3 | 3 | 3 | 379  | 41.6  | 8.24 | 7.59 | 3 | 1 |
| 5.754E+18  | IsMasterProtein | A0A8C5CZG8 | Uncharacterized protein OS=Gadus morhua OX=8049 PE=4 SV=1                                     | 6  | 3 | 3 | 3 | 931  | 97.8  | 5.78 | 7.59 | 3 | 1 |
| 4.4379E+18 | IsMasterProtein | A0A8C5BVD9 | Bromodomain and WD repeat domain containing 1 OS=Gadus morhua OX=8049 GN=brwd1 PE=4 SV=1      | 2  | 3 | 3 | 3 | 2261 | 254.5 | 7.4  | 7.59 | 3 | 1 |
| -9E+18     | IsMasterProtein | A0A8C5B834 | Uncharacterized protein OS=Gadus morhua OX=8049 PE=4 SV=1                                     | 5  | 2 | 3 | 2 | 544  | 60.3  | 5.59 | 7.59 | 2 | 1 |
| -8.656E+18 | IsMasterProtein | A0A8C5BY57 | Structural maintenance of chromosomes protein 4 OS=Gadus morhua OX=8049 GN=smc4 PE=3 SV=1     | 4  | 3 | 3 | 3 | 1163 | 131.8 | 8.15 | 7.59 | 3 | 1 |
| -8.376E+18 | IsMasterProtein | A0A8C5AEV9 | Aldehyde dehydrogenase 1 family, member A3 OS=Gadus morhua OX=8049 GN=aldh1a3 PE=3 SV=1       | 8  | 3 | 3 | 3 | 420  | 46.2  | 7.62 | 7.57 | 3 | 1 |
| -1.252E+18 | IsMasterProtein | A0A8C5CG95 | Cofilin 1 OS=Gadus morhua OX=8049 PE=3 SV=1                                                   | 19 | 4 | 4 | 4 | 170  | 19.1  | 7.21 | 7.57 | 4 | 1 |
| -5.005E+18 | IsMasterProtein | A0A8C5CB31 | Nuclear receptor corepressor 2 OS=Gadus morhua OX=8049 PE=3 SV=1                              | 2  | 2 | 3 | 2 | 1816 | 200.2 | 8.57 | 7.56 | 2 | 1 |
| 1.2225E+18 | IsMasterProtein | A0A8C5A8E0 | DNA polymerase zeta catalytic subunit OS=Gadus morhua OX=8049 GN=REV3L PE=3 SV=1              | 2  | 3 | 3 | 3 | 2641 | 290.8 | 7.2  | 7.56 | 3 | 1 |
| -6.912E+18 | IsMasterProtein | A0A8C5F8A9 | Collagenase 3-like OS=Gadus morhua OX=8049 GN=LOC115547823 PE=3 SV=1                          | 10 | 3 | 3 | 3 | 444  | 50.6  | 8.43 | 7.56 | 3 | 1 |
| -7.474E+18 | IsMasterProtein | A0A8C5FWW9 | Phospholipid-transporting ATPase ABCA1-like OS=Gadus morhua OX=8049 GN=zgc:172302 PE=4 SV=1   | 3  | 3 | 3 | 3 | 2153 | 239.4 | 6.89 | 7.55 | 3 | 1 |
| -2.241E+18 | IsMasterProtein | A0A8C4ZET2 | 26S proteasome regulatory subunit 6A-B-like OS=Gadus morhua OX=8049 GN=LOC115558389 PE=3 SV=1 | 8  | 3 | 3 | 3 | 428  | 47.8  | 5.29 | 7.55 | 3 | 1 |
| -9.176E+18 | IsMasterProtein | A0A8C5BEV6 | Elastin microfibril interfacer 1b OS=Gadus morhua OX=8049 GN=emilin1b PE=4 SV=1               | 5  | 3 | 3 | 3 | 1212 | 126.5 | 6.65 | 7.55 | 3 | 1 |
| 5.1238E+18 | IsMasterProtein | A0A8C5CCN3 | Collagen, type XII, alpha 1b OS=Gadus morhua OX=8049 PE=4 SV=1                                | 1  | 3 | 3 | 3 | 3296 | 357.2 | 5.87 | 7.53 | 3 | 1 |
| -4.378E+18 | IsMasterProtein | A0A8C5BAL8 | Zinc finger and BTB domain containing 4 OS=Gadus morhua OX=8049 PE=4 SV=1                     | 4  | 3 | 3 | 3 | 1141 | 123.1 | 9.41 | 7.53 | 3 | 1 |
| 2.114E+18  | IsMasterProtein | A0A8C5FUF8 | Myelin protein zero OS=Gadus morhua OX=8049 GN=mpz PE=4 SV=1                                  | 5  | 2 | 3 | 2 | 213  | 23.7  | 9.45 | 7.51 | 2 | 1 |
| -6.54E+18  | IsMasterProtein | A0A8C5F424 | HD domain-containing protein OS=Gadus morhua OX=8049 PE=4 SV=1                                | 6  | 3 | 3 | 3 | 528  | 61.6  | 9.04 | 7.51 | 3 | 1 |
| 7.4753E+17 | IsMasterProtein | A0A8C5BX78 | Diacylglycerol kinase OS=Gadus morhua OX=8049 PE=3 SV=1                                       | 6  | 3 | 3 | 3 | 1044 | 115.8 | 8.06 | 7.5  | 3 | 1 |
| 1.8002E+18 | IsMasterProtein | A0A8C5AZ40 | Testis expressed 9 OS=Gadus morhua OX=8049 GN=TEX9 PE=4 SV=1                                  | 13 | 3 | 3 | 3 | 523  | 58.1  | 8.65 | 7.5  | 3 | 1 |
| 6.4335E+18 | IsMasterProtein | A0A8C5FVL8 | Tripartite motif containing 63a OS=Gadus morhua OX=8049 PE=4 SV=1                             | 6  | 2 | 3 | 2 | 341  | 38.1  | 5.47 | 7.5  | 2 | 1 |

|                |                 |            |                                                                                                                |    |   |   |   |      |       |       |      |   |   |
|----------------|-----------------|------------|----------------------------------------------------------------------------------------------------------------|----|---|---|---|------|-------|-------|------|---|---|
| -<br>9.128E+18 | IsMasterProtein | A0A8C5F905 | RAB3 GTPase activating protein subunit 2 (non-catalytic) OS=Gadus morhua OX=8049 GN=rab3gap2 PE=3 SV=1         | 4  | 3 | 3 | 3 | 1304 | 143.2 | 6.21  | 7.49 | 3 | 1 |
| 3.1166E+18     | IsMasterProtein | A0A8C5A4Y4 | Ribonuclease H OS=Gadus morhua OX=8049 PE=3 SV=1                                                               | 2  | 2 | 3 | 2 | 1478 | 164.9 | 7.99  | 7.49 | 2 | 1 |
| -<br>8.87E+18  | IsMasterProtein | A0A8C4ZXE6 | [Histone H3]-trimethyl-L-lysine(4) demethylase OS=Gadus morhua OX=8049 GN=kdm5bb PE=3 SV=1                     | 3  | 3 | 3 | 3 | 1547 | 173.2 | 6.04  | 7.49 | 3 | 1 |
| -<br>7.649E+18 | IsMasterProtein | A0A8C5CPF5 | Transformation/transcription domain-associated protein OS=Gadus morhua OX=8049 PE=4 SV=1                       | 1  | 3 | 3 | 3 | 3778 | 428.7 | 8.34  | 7.49 | 3 | 1 |
| 3.6591E+18     | IsMasterProtein | A0A8C5BEB5 | Sodium/potassium/calcium exchanger 1-like OS=Gadus morhua OX=8049 GN=si:ch211-137a8.4 PE=4 SV=1                | 7  | 2 | 3 | 2 | 623  | 64.9  | 4.69  | 7.48 | 2 | 1 |
| 3.3434E+18     | IsMasterProtein | A0A8C5CJ05 | Zinc finger protein RFP-like OS=Gadus morhua OX=8049 GN=LOC115541740 PE=4 SV=1                                 | 7  | 3 | 3 | 2 | 543  | 62    | 7.87  | 7.47 | 3 | 1 |
| -<br>3.913E+18 | IsMasterProtein | A0A8C5AHN6 | Annexin OS=Gadus morhua OX=8049 GN=ANXA5 PE=3 SV=1                                                             | 10 | 3 | 3 | 3 | 321  | 35.8  | 6.3   | 7.47 | 3 | 1 |
| 3.9792E+18     | IsMasterProtein | A0A8C5B7M5 | Apolipoprotein L3-like OS=Gadus morhua OX=8049 GN=LOC115532197 PE=3 SV=1                                       | 14 | 3 | 3 | 3 | 539  | 59.1  | 5.4   | 7.47 | 3 | 1 |
| 6.8963E+18     | IsMasterProtein | A0A8C5FKE5 | GRIP and coiled-coil domain containing 1 OS=Gadus morhua OX=8049 GN=gec1 PE=4 SV=1                             | 7  | 3 | 3 | 3 | 840  | 93.3  | 5.58  | 7.46 | 3 | 1 |
| 6.7875E+18     | IsMasterProtein | A0A8C5CRF2 | Spectrin beta chain OS=Gadus morhua OX=8049 GN=LOC115559640 PE=3 SV=1                                          | 2  | 3 | 3 | 2 | 2311 | 264.2 | 5.95  | 7.45 | 3 | 1 |
| 7.939E+18      | IsMasterProtein | A0A8C5D1E1 | Splicing factor 3b, subunit 2 OS=Gadus morhua OX=8049 GN=sf3b2 PE=4 SV=1                                       | 6  | 3 | 3 | 2 | 825  | 92.4  | 5.91  | 7.44 | 3 | 1 |
| -<br>6.973E+18 | IsMasterProtein | A0A8C4Z7T8 | Sorting nexin-1 OS=Gadus morhua OX=8049 GN=snx1 PE=3 SV=1                                                      | 10 | 3 | 3 | 3 | 517  | 58.2  | 5.1   | 7.43 | 3 | 1 |
| -<br>8.585E+18 | IsMasterProtein | A0A8C4YST1 | Heterochromatin protein 1-binding protein 3 OS=Gadus morhua OX=8049 GN=hp1bp3 PE=4 SV=1                        | 6  | 3 | 3 | 3 | 580  | 62.3  | 10.02 | 7.43 | 3 | 1 |
| -<br>5.199E+18 | IsMasterProtein | A0A8C5C3T7 | Rac/Cdc42 guanine nucleotide exchange factor (GEF) 6 OS=Gadus morhua OX=8049 GN=arhgef6 PE=4 SV=1              | 5  | 2 | 3 | 2 | 565  | 63.1  | 6.76  | 7.42 | 2 | 1 |
| -<br>6.873E+18 | IsMasterProtein | A0A8C4ZB15 | Uncharacterized protein OS=Gadus morhua OX=8049 PE=3 SV=1                                                      | 6  | 3 | 3 | 3 | 671  | 73.9  | 6.07  | 7.42 | 3 | 1 |
| -<br>6.13E+18  | IsMasterProtein | A0A8C5BH51 | Uncharacterized protein OS=Gadus morhua OX=8049 PE=4 SV=1                                                      | 4  | 3 | 3 | 3 | 652  | 69.9  | 7.9   | 7.42 | 3 | 1 |
| -<br>6.158E+17 | IsMasterProtein | A0A8C4ZZU4 | Fibroblast growth factor binding protein 2b OS=Gadus morhua OX=8049 PE=3 SV=1                                  | 14 | 2 | 3 | 2 | 219  | 24    | 9.58  | 7.42 | 2 | 1 |
| -<br>9.001E+18 | IsMasterProtein | A0A8C5FWC4 | FZ domain-containing protein OS=Gadus morhua OX=8049 PE=4 SV=1                                                 | 2  | 3 | 3 | 3 | 1203 | 130.2 | 6.44  | 7.42 | 3 | 1 |
| 6.226E+18      | IsMasterProtein | A0A8C5F6P1 | 60S ribosomal protein L34 OS=Gadus morhua OX=8049 GN=RPL34 PE=3 SV=1                                           | 15 | 3 | 3 | 3 | 117  | 13.3  | 11.47 | 7.41 | 3 | 1 |
| -<br>9.07E+18  | IsMasterProtein | A0A8C5CCX9 | Serine protease 33-like OS=Gadus morhua OX=8049 GN=LOC115531199 PE=4 SV=1                                      | 14 | 3 | 3 | 3 | 310  | 33.4  | 6.2   | 7.41 | 3 | 1 |
| 5.2524E+18     | IsMasterProtein | A0A8C5AZI2 | Mucin-5AC-like OS=Gadus morhua OX=8049 GN=si:ch211-214c7.4 PE=4 SV=1                                           | 2  | 2 | 3 | 2 | 1483 | 155   | 4.77  | 7.41 | 2 | 1 |
| -<br>4.785E+18 | IsMasterProtein | A0A8C5BI75 | NADH-ubiquinone oxidoreductase 75 kDa subunit, mitochondrial OS=Gadus morhua OX=8049 GN=LOC115542279 PE=3 SV=1 | 4  | 2 | 3 | 2 | 746  | 80.5  | 5.49  | 7.41 | 2 | 1 |
| -<br>6.829E+18 | IsMasterProtein | A0A8C5AJ74 | Polycystic kidney and hepatic disease 1 (autosomal recessive)-like 1 OS=Gadus morhua OX=8049 PE=4 SV=1         | 1  | 3 | 3 | 3 | 3718 | 400.8 | 5.69  | 7.41 | 3 | 1 |

|                |                 |            |                                                                                                                         |    |   |   |   |      |       |      |      |   |   |
|----------------|-----------------|------------|-------------------------------------------------------------------------------------------------------------------------|----|---|---|---|------|-------|------|------|---|---|
| -<br>4.217E+18 | IsMasterProtein | A0A8C5FL36 | Carboxypeptidase X, M14 family member 2 OS=Gadus morhua OX=8049 GN=CPXM2 PE=3 SV=1                                      | 6  | 3 | 3 | 3 | 807  | 91.7  | 9.14 | 7.4  | 3 | 1 |
| 7.559E+17      | IsMasterProtein | A0A8C4ZTR8 | T-complex protein 1 subunit epsilon OS=Gadus morhua OX=8049 PE=3 SV=1                                                   | 5  | 3 | 3 | 3 | 585  | 64.2  | 6.55 | 7.4  | 3 | 1 |
| -<br>9.083E+18 | IsMasterProtein | A0A8C5CHP6 | ATG16 autophagy related 16-like 1 (S. cerevisiae) OS=Gadus morhua OX=8049 PE=3 SV=1                                     | 11 | 3 | 3 | 3 | 551  | 62    | 7.09 | 7.38 | 3 | 1 |
| -<br>6.775E+18 | IsMasterProtein | A0A8C5A1E6 | LIM domain 7a OS=Gadus morhua OX=8049 PE=4 SV=1                                                                         | 4  | 3 | 3 | 3 | 1223 | 136.6 | 7.85 | 7.36 | 3 | 1 |
| 3.819E+18      | IsMasterProtein | A0A8C5BWI7 | Calpain 5b OS=Gadus morhua OX=8049 PE=3 SV=1                                                                            | 7  | 3 | 3 | 3 | 601  | 69.1  | 6.73 | 7.34 | 3 | 1 |
| 2.401E+18      | IsMasterProtein | A0A8C5AM92 | Transient receptor potential cation channel subfamily M member 1-like OS=Gadus morhua OX=8049 GN=LOC115550405 PE=4 SV=1 | 3  | 2 | 3 | 2 | 1777 | 199.1 | 6.86 | 7.34 | 2 | 1 |
| 7.068E+18      | IsMasterProtein | A0A8C5AFY8 | Uncharacterized protein OS=Gadus morhua OX=8049 PE=3 SV=1                                                               | 3  | 3 | 3 | 3 | 1352 | 144.5 | 6.11 | 7.34 | 3 | 1 |
| -<br>9.157E+18 | IsMasterProtein | A0A8C5C392 | Centrosomal protein 170B OS=Gadus morhua OX=8049 PE=3 SV=1                                                              | 2  | 2 | 3 | 2 | 1626 | 176.4 | 7.97 | 7.33 | 2 | 1 |
| 9.350E+17      | IsMasterProtein | A0A8C5CKL7 | Cilia and flagella associated protein 92 (putative) OS=Gadus morhua OX=8049 GN=cfap92 PE=4 SV=1                         | 3  | 2 | 3 | 2 | 1232 | 137.7 | 8.03 | 7.33 | 2 | 1 |
| -<br>2.749E+18 | IsMasterProtein | A0A8C5A8G8 | G protein-coupled receptor 158a OS=Gadus morhua OX=8049 PE=3 SV=1                                                       | 5  | 3 | 3 | 3 | 1207 | 134.3 | 8.32 | 7.33 | 3 | 1 |
| 7.691E+18      | IsMasterProtein | A0A8C5B160 | P-type Cu(+) transporter OS=Gadus morhua OX=8049 GN=atp7a PE=3 SV=1                                                     | 4  | 3 | 3 | 3 | 1343 | 143.5 | 6.51 | 7.32 | 3 | 1 |
| 3.319E+18      | IsMasterProtein | A0A8C5F6X3 | Polycystic kidney disease 1a OS=Gadus morhua OX=8049 PE=3 SV=1                                                          | 1  | 2 | 3 | 2 | 4260 | 461   | 6.84 | 7.32 | 2 | 1 |
| -<br>6.91E+18  | IsMasterProtein | A0A8C5A2I3 | HIVEP zinc finger 2b OS=Gadus morhua OX=8049 PE=4 SV=1                                                                  | 3  | 3 | 3 | 3 | 1851 | 197.2 | 7.56 | 7.31 | 3 | 1 |
| -<br>7.968E+18 | IsMasterProtein | A0A8C5CFK0 | RUN and SH3 domain containing 2 OS=Gadus morhua OX=8049 GN=rusc2 PE=4 SV=1                                              | 4  | 3 | 3 | 3 | 1489 | 160.6 | 6.62 | 7.31 | 3 | 1 |
| 7.558E+18      | IsMasterProtein | A0A8C5F7X5 | SPG11 vesicle trafficking associated, spatacsin OS=Gadus morhua OX=8049 GN=spg11 PE=4 SV=1                              | 2  | 3 | 3 | 3 | 2281 | 252.4 | 6.47 | 7.3  | 3 | 1 |
| -<br>2.201E+18 | IsMasterProtein | A0A8C5ACQ0 | Uncharacterized protein OS=Gadus morhua OX=8049 PE=3 SV=1                                                               | 2  | 2 | 3 | 2 | 2236 | 243.7 | 7.2  | 7.3  | 2 | 1 |
| 3.246E+18      | IsMasterProtein | A0A8C5FI59 | Cytoplasmic FMR1-interacting protein OS=Gadus morhua OX=8049 PE=3 SV=1                                                  | 4  | 3 | 3 | 3 | 1226 | 142.4 | 7.08 | 7.29 | 3 | 1 |
| -<br>4.294E+18 | IsMasterProtein | A0A8C5CJ01 | Succinyl-CoA:3-ketoacid-coenzyme A transferase OS=Gadus morhua OX=8049 GN=oxct1a PE=3 SV=1                              | 8  | 3 | 3 | 3 | 527  | 57.4  | 7.97 | 7.29 | 3 | 1 |
| -<br>4.056E+18 | IsMasterProtein | A0A8C5BER0 | MI domain-containing protein OS=Gadus morhua OX=8049 PE=4 SV=1                                                          | 4  | 3 | 3 | 3 | 1024 | 115.8 | 8.06 | 7.29 | 3 | 1 |
| -<br>2.471E+18 | IsMasterProtein | A0A8C4ZS84 | Activating signal cointegrator 1 complex subunit 3 OS=Gadus morhua OX=8049 GN=ascc3 PE=3 SV=1                           | 2  | 3 | 3 | 3 | 2176 | 245.9 | 6.7  | 7.28 | 3 | 1 |
| 1.628E+18      | IsMasterProtein | A0A8C5CK47 | CARD domain-containing protein OS=Gadus morhua OX=8049 PE=4 SV=1                                                        | 30 | 2 | 3 | 2 | 101  | 11.2  | 5.54 | 7.28 | 2 | 1 |
| -<br>8.51E+18  | IsMasterProtein | A0A8C5A395 | Hephaestin-like protein 1 OS=Gadus morhua OX=8049 GN=LOC115547043 PE=3 SV=1                                             | 3  | 2 | 2 | 2 | 1107 | 123.9 | 5.4  | 7.27 | 2 | 1 |
| 3.361E+18      | IsMasterProtein | A0A8C5CDN7 | Uncharacterized LOC115553921 OS=Gadus morhua OX=8049 GN=si:dkeyp-69b9.6 PE=4 SV=1                                       | 3  | 2 | 3 | 2 | 1629 | 173.1 | 9.28 | 7.27 | 2 | 1 |

|                    |                     |                |                                                                                               |    |   |   |   |      |           |           |      |   |   |
|--------------------|---------------------|----------------|-----------------------------------------------------------------------------------------------|----|---|---|---|------|-----------|-----------|------|---|---|
| -<br>5.108E+1<br>8 | IsMasterProt<br>ein | A0A8C5A3E<br>1 | Glutathione transferase OS=Gadus morhua OX=8049<br>GN=LOC115553606 PE=3 SV=1                  | 13 | 3 | 3 | 3 | 238  | 28.1      | 8.27      | 7.27 | 3 | 1 |
| -<br>7.982E+1<br>8 | IsMasterProt<br>ein | A0A8C4Z665     | Coagulation factor V OS=Gadus morhua OX=8049 PE=3 SV=1                                        | 4  | 3 | 3 | 3 | 1602 | 182.<br>3 | 7.01      | 7.27 | 3 | 1 |
| 8.568E+<br>18      | IsMasterProt<br>ein | A0A8C4ZLQ<br>1 | 60S ribosomal protein L21 OS=Gadus morhua OX=8049 GN=rp121 PE=3<br>SV=1                       | 14 | 3 | 3 | 3 | 160  | 18.5      | 10.5<br>5 | 7.27 | 3 | 1 |
| -<br>8.592E+1<br>8 | IsMasterProt<br>ein | A0A8C5C632     | DNA-dependent protein kinase catalytic subunit OS=Gadus morhua<br>OX=8049 PE=3 SV=1           | 1  | 3 | 3 | 3 | 3774 | 425.<br>7 | 7.21      | 7.27 | 3 | 1 |
| 4.1507E+<br>18     | IsMasterProt<br>ein | A0A8C5BMF<br>1 | Si:ch211-284e13.4 OS=Gadus morhua OX=8049 PE=4 SV=1                                           | 3  | 2 | 3 | 2 | 1198 | 123.<br>7 | 8.81      | 7.27 | 2 | 1 |
| -<br>8.161E+1<br>8 | IsMasterProt<br>ein | A0A8C5AQS<br>9 | RNA helicase OS=Gadus morhua OX=8049 GN=dhx30 PE=4 SV=1                                       | 6  | 3 | 3 | 3 | 1068 | 117.<br>4 | 8.48      | 7.26 | 3 | 1 |
| -<br>8.526E+1<br>8 | IsMasterProt<br>ein | A0A8C5ALL<br>9 | Nuclear receptor binding SET domain protein 2 OS=Gadus morhua<br>OX=8049 GN=nsd2 PE=4 SV=1    | 3  | 3 | 3 | 3 | 1548 | 169.<br>9 | 8.02      | 7.26 | 3 | 1 |
| 8.5499E+<br>17     | IsMasterProt<br>ein | A0A8C4Z448     | Isoaspartyl peptidase/L-asparaginase OS=Gadus morhua OX=8049<br>GN=si:dkey-103j14.5 PE=3 SV=1 | 9  | 2 | 2 | 2 | 310  | 32.5      | 5.52      | 7.25 | 2 | 1 |
| 4.7097E+<br>18     | IsMasterProt<br>ein | A0A8C5F6H<br>7 | Dynein, axonemal, heavy chain 1 OS=Gadus morhua OX=8049 PE=3<br>SV=1                          | 1  | 3 | 3 | 3 | 4170 | 470.<br>3 | 6.04      | 7.23 | 3 | 1 |
| -<br>6.15E+18      | IsMasterProt<br>ein | A0A8C4ZX<br>W1 | Proteasome subunit beta OS=Gadus morhua OX=8049 GN=psmb1 PE=3<br>SV=1                         | 19 | 3 | 3 | 3 | 237  | 26.1      | 7.49      | 7.22 | 3 | 1 |
| 1.8296E+<br>18     | IsMasterProt<br>ein | A0A8C4ZAU<br>0 | Outer dense fiber of sperm tails 2a OS=Gadus morhua OX=8049<br>GN=odf2a PE=3 SV=1             | 5  | 3 | 3 | 3 | 830  | 94.3      | 6.47      | 7.22 | 3 | 1 |
| -<br>6.66E+18      | IsMasterProt<br>ein | A0A8C5B6C<br>0 | Fibulin 2 OS=Gadus morhua OX=8049 GN=fbln2 PE=3 SV=1                                          | 2  | 2 | 2 | 2 | 1516 | 160.<br>3 | 5.14      | 7.22 | 2 | 1 |
| -<br>3.436E+1<br>8 | IsMasterProt<br>ein | A0A8C5CHN<br>3 | Zinc finger protein 609a OS=Gadus morhua OX=8049 PE=4 SV=1                                    | 3  | 3 | 3 | 3 | 1478 | 157.<br>3 | 7.02      | 7.22 | 3 | 1 |
| -<br>4.118E+1<br>8 | IsMasterProt<br>ein | A0A8C4Z6K<br>2 | Uncharacterized protein OS=Gadus morhua OX=8049 PE=4 SV=1                                     | 3  | 3 | 3 | 3 | 2217 | 232.<br>4 | 8.48      | 7.22 | 3 | 1 |
| 6.042E+1<br>7      | IsMasterProt<br>ein | A0A8C5ATF<br>0 | Integrase catalytic domain-containing protein OS=Gadus morhua<br>OX=8049 PE=4 SV=1            | 10 | 3 | 3 | 3 | 639  | 73.3      | 9.04      | 7.21 | 3 | 1 |
| -<br>1.939E+1<br>8 | IsMasterProt<br>ein | A0A8C5APF<br>3 | Leucine zipper protein 1 OS=Gadus morhua OX=8049 GN=luzp1 PE=4<br>SV=1                        | 4  | 3 | 3 | 3 | 1181 | 129.<br>2 | 8.47      | 7.21 | 3 | 1 |
| -<br>8.977E+1<br>8 | IsMasterProt<br>ein | A0A8C5CVR<br>9 | Leukocyte cell-derived chemotaxin 2 like OS=Gadus morhua OX=8049<br>GN=lect2l PE=3 SV=1       | 19 | 2 | 2 | 2 | 157  | 17.1      | 8.82      | 7.21 | 2 | 1 |
| 4.5365E+<br>18     | IsMasterProt<br>ein | A0A8C5C8N<br>8 | Uncharacterized protein OS=Gadus morhua OX=8049 PE=4 SV=1                                     | 4  | 3 | 3 | 3 | 1308 | 143.<br>1 | 5.76      | 7.2  | 3 | 1 |
| -<br>8.784E+1<br>8 | IsMasterProt<br>ein | A0A8C5CDZ<br>7 | 26S proteasome non-ATPase regulatory subunit 2 OS=Gadus morhua<br>OX=8049 GN=PSMD2 PE=3 SV=1  | 6  | 3 | 3 | 3 | 540  | 58.3      | 6.19      | 7.19 | 3 | 1 |
| -<br>5.294E+1<br>8 | IsMasterProt<br>ein | A0A8C5BK7<br>5 | DENN/MADD domain containing 5B OS=Gadus morhua OX=8049<br>GN=dennd5b PE=3 SV=1                | 4  | 3 | 3 | 3 | 1232 | 138.<br>5 | 6.84      | 7.19 | 3 | 1 |
| -<br>6.842E+1<br>8 | IsMasterProt<br>ein | A0A8C5FLG<br>9 | Uncharacterized protein OS=Gadus morhua OX=8049 PE=4 SV=1                                     | 11 | 3 | 3 | 3 | 466  | 53.1      | 6.54      | 7.19 | 3 | 1 |
| -<br>7.951E+1<br>8 | IsMasterProt<br>ein | A0A8C5CHY<br>1 | FGGY carbohydrate kinase domain containing OS=Gadus morhua<br>OX=8049 GN=fggg PE=3 SV=1       | 7  | 2 | 3 | 2 | 554  | 59.9      | 5.71      | 7.19 | 2 | 1 |



|            |                 |            |                                                                                                   |    |   |   |   |      |       |       |      |   |   |
|------------|-----------------|------------|---------------------------------------------------------------------------------------------------|----|---|---|---|------|-------|-------|------|---|---|
| 6.7095E+18 | IsMasterProtein | A0A8C5BCZ5 | Lipase, gastric OS=Gadus morhua OX=8049 GN=lipf PE=4 SV=1                                         | 12 | 3 | 3 | 3 | 361  | 40.6  | 6.81  | 7.19 | 3 | 1 |
| 7.3202E+17 | IsMasterProtein | A0A8C4ZCM7 | Vacuolar protein sorting-associated protein 28 homolog OS=Gadus morhua OX=8049 GN=vps28 PE=3 SV=1 | 16 | 3 | 3 | 3 | 212  | 24.3  | 5.25  | 7.18 | 3 | 1 |
| 2.7066E+18 | IsMasterProtein | A0A8C4ZED7 | DOP1 leucine zipper like protein B OS=Gadus morhua OX=8049 PE=3 SV=1                              | 2  | 3 | 3 | 3 | 2170 | 240   | 6.51  | 7.18 | 3 | 1 |
| -7.064E+18 | IsMasterProtein | A0A8C5BQQ9 | Histone-lysine N-methyltransferase OS=Gadus morhua OX=8049 PE=3 SV=1                              | 1  | 3 | 3 | 3 | 4488 | 480.6 | 9.32  | 7.18 | 3 | 1 |
| 3.5467E+18 | IsMasterProtein | A0A8C5AV60 | Zinc fingers and homeoboxes 1 OS=Gadus morhua OX=8049 GN=ZHX1 PE=4 SV=1                           | 6  | 3 | 3 | 3 | 1013 | 107.8 | 5.17  | 7.17 | 3 | 1 |
| -1.146E+18 | IsMasterProtein | A0A8C5F5Y3 | KIAA0895 like OS=Gadus morhua OX=8049 GN=kiaa0895l PE=4 SV=1                                      | 10 | 3 | 3 | 3 | 534  | 59.6  | 9.51  | 7.17 | 3 | 1 |
| -3.908E+18 | IsMasterProtein | A0A8C5AEX5 | DNA replication licensing factor MCM6 OS=Gadus morhua OX=8049 PE=3 SV=1                           | 7  | 3 | 3 | 3 | 842  | 94.4  | 5.55  | 7.17 | 3 | 1 |
| -6.809E+17 | IsMasterProtein | A0A8C5APJ7 | Ribonuclease H OS=Gadus morhua OX=8049 PE=3 SV=1                                                  | 5  | 2 | 3 | 2 | 907  | 99.1  | 9.76  | 7.16 | 2 | 1 |
| -6.587E+18 | IsMasterProtein | A0A8C5BES6 | Heme-binding protein 2-like OS=Gadus morhua OX=8049 GN=LOC115538475 PE=3 SV=1                     | 21 | 3 | 3 | 3 | 196  | 22.3  | 5.11  | 7.16 | 3 | 1 |
| -5.269E+18 | IsMasterProtein | A0A8C4ZQW0 | Ferritin OS=Gadus morhua OX=8049 GN=fth1a PE=3 SV=1                                               | 18 | 2 | 3 | 2 | 177  | 20.6  | 5.92  | 7.16 | 2 | 1 |
| 5.0677E+18 | IsMasterProtein | A0A8C5BHK0 | Hook microtubule-tethering protein 2 OS=Gadus morhua OX=8049 GN=hook2 PE=3 SV=1                   | 8  | 3 | 3 | 3 | 640  | 73.8  | 6.79  | 7.16 | 3 | 1 |
| -1.4E+18   | IsMasterProtein | A0A8C4ZR14 | Transforming growth factor beta OS=Gadus morhua OX=8049 GN=tgfb1a PE=3 SV=1                       | 13 | 2 | 2 | 2 | 379  | 42.5  | 8.35  | 7.16 | 2 | 1 |
| -2.104E+18 | IsMasterProtein | A0A8C5CQM6 | PDZ domain containing 7a OS=Gadus morhua OX=8049 PE=4 SV=1                                        | 3  | 2 | 3 | 2 | 928  | 100.5 | 10.26 | 7.15 | 2 | 1 |
| 5.8984E+18 | IsMasterProtein | A0A8C4ZNN9 | Glutathione S-transferase omega OS=Gadus morhua OX=8049 GN=gsto1 PE=3 SV=1                        | 14 | 3 | 3 | 3 | 239  | 27.4  | 6.7   | 7.15 | 3 | 1 |
| -8.96E+18  | IsMasterProtein | A0A8C5AV36 | TGc domain-containing protein OS=Gadus morhua OX=8049 PE=4 SV=1                                   | 8  | 2 | 3 | 2 | 384  | 41.2  | 9.55  | 7.15 | 2 | 1 |
| -8.485E+18 | IsMasterProtein | A0A8C5AEC2 | Regulatory factor X, 4 OS=Gadus morhua OX=8049 GN=rfx4 PE=4 SV=1                                  | 8  | 3 | 3 | 3 | 698  | 79    | 7.17  | 7.14 | 3 | 1 |
| 6.7958E+18 | IsMasterProtein | A0A8C5BTP8 | Uncharacterized protein OS=Gadus morhua OX=8049 PE=4 SV=1                                         | 2  | 3 | 3 | 3 | 2115 | 233.9 | 4.82  | 7.14 | 3 | 1 |
| -3.763E+18 | IsMasterProtein | A0A8C5F7T1 | Uncharacterized protein OS=Gadus morhua OX=8049 PE=4 SV=1                                         | 4  | 3 | 3 | 3 | 865  | 97    | 8.35  | 7.13 | 3 | 1 |
| -2.441E+18 | IsMasterProtein | A0A8C5A2Y8 | Cell division cycle 42, like OS=Gadus morhua OX=8049 GN=cdc42l PE=4 SV=1                          | 15 | 2 | 3 | 2 | 136  | 14.9  | 7.72  | 7.13 | 2 | 1 |
| -2.192E+18 | IsMasterProtein | A0A8C5CNN9 | HIVEP zinc finger 1 OS=Gadus morhua OX=8049 GN=hivep1 PE=4 SV=1                                   | 2  | 3 | 3 | 3 | 2656 | 284.7 | 8.1   | 7.13 | 3 | 1 |
| -8.925E+18 | IsMasterProtein | A0A8C5ACK3 | Annexin OS=Gadus morhua OX=8049 GN=anxa3b PE=3 SV=1                                               | 8  | 3 | 3 | 3 | 316  | 34.5  | 5.95  | 7.13 | 3 | 1 |
| -6.919E+18 | IsMasterProtein | A0A8C5ADL4 | TSC complex subunit 1b OS=Gadus morhua OX=8049 GN=tsc1b PE=4 SV=1                                 | 4  | 3 | 3 | 3 | 1369 | 147.7 | 7.59  | 7.12 | 3 | 1 |

|                    |                     |                |                                                                                                  |    |   |   |   |      |           |      |      |   |   |
|--------------------|---------------------|----------------|--------------------------------------------------------------------------------------------------|----|---|---|---|------|-----------|------|------|---|---|
| -<br>7.493E+1<br>8 | IsMasterProt<br>ein | A0A8C5B6D<br>6 | MAP7 domain containing 3 OS=Gadus morhua OX=8049 GN=map7d3<br>PE=3 SV=1                          | 4  | 3 | 3 | 3 | 884  | 96.3      | 8.27 | 7.11 | 3 | 1 |
| -<br>7.524E+1<br>8 | IsMasterProt<br>ein | A0A8C5CEN<br>5 | Integrin alpha-6-like OS=Gadus morhua OX=8049 GN=LOC115549061<br>PE=3 SV=1                       | 2  | 2 | 3 | 2 | 1055 | 116.<br>3 | 7.09 | 7.11 | 2 | 1 |
| -<br>4.389E+1<br>8 | IsMasterProt<br>ein | A0A8C5AVA<br>5 | Zinc finger protein 219 OS=Gadus morhua OX=8049 GN=znf219 PE=4<br>SV=1                           | 2  | 2 | 3 | 2 | 1337 | 137.<br>4 | 6.62 | 7.11 | 2 | 1 |
| -<br>3.972E+1<br>8 | IsMasterProt<br>ein | A0A8C4ZSN<br>3 | DNA (cytosine-5-)-methyltransferase OS=Gadus morhua OX=8049<br>GN=dnm3ba PE=3 SV=1               | 4  | 3 | 3 | 3 | 1455 | 162.<br>5 | 6.46 | 7.1  | 3 | 1 |
| -<br>1.369E+1<br>8 | IsMasterProt<br>ein | A0A8C4ZTE<br>0 | Apolipoprotein Ba OS=Gadus morhua OX=8049 GN=apoba PE=4 SV=1                                     | 1  | 3 | 3 | 3 | 4237 | 474.<br>4 | 6.34 | 7.09 | 3 | 1 |
| -<br>6.641E+1<br>8 | IsMasterProt<br>ein | A0A8C5FFA<br>7 | Uncharacterized protein OS=Gadus morhua OX=8049 PE=4 SV=1                                        | 5  | 3 | 3 | 2 | 1193 | 130.<br>4 | 8.85 | 7.08 | 3 | 1 |
| -<br>7.911E+1<br>8 | IsMasterProt<br>ein | A0A8C5CHV<br>7 | Copine-1-like OS=Gadus morhua OX=8049 GN=CPNE1 PE=3 SV=1                                         | 5  | 2 | 2 | 2 | 547  | 59.9      | 6.11 | 7.07 | 2 | 1 |
| -<br>3.125E+1<br>8 | IsMasterProt<br>ein | A0A8C5A3M<br>2 | FAT atypical cadherin 3b OS=Gadus morhua OX=8049 PE=4 SV=1                                       | 1  | 3 | 3 | 3 | 4242 | 459.<br>3 | 4.81 | 7.06 | 3 | 1 |
| -<br>3.941E+1<br>8 | IsMasterProt<br>ein | A0A8C5AG7<br>5 | C-terminal binding protein 1 OS=Gadus morhua OX=8049 GN=ctbp1<br>PE=3 SV=1                       | 16 | 3 | 3 | 3 | 323  | 35        | 8    | 7.05 | 3 | 1 |
| -<br>5.684E+1<br>8 | IsMasterProt<br>ein | A0A8C5F495     | CEP170_C domain-containing protein OS=Gadus morhua OX=8049 PE=3<br>SV=1                          | 3  | 3 | 3 | 3 | 1566 | 168       | 8.29 | 7.05 | 3 | 1 |
| -<br>2.923E+1<br>8 | IsMasterProt<br>ein | A0A8C4ZZU<br>0 | DNA (cytosine-5-)-methyltransferase OS=Gadus morhua OX=8049 PE=3<br>SV=1                         | 5  | 3 | 3 | 3 | 935  | 104.<br>5 | 8.02 | 7.04 | 3 | 1 |
| -<br>9.035E+1<br>8 | IsMasterProt<br>ein | A0A8C5BM<br>U4 | Mitogen-activated protein kinase OS=Gadus morhua OX=8049 PE=4<br>SV=1                            | 10 | 3 | 3 | 3 | 368  | 42.1      | 8.82 | 7.04 | 3 | 1 |
| -<br>7.744E+1<br>8 | IsMasterProt<br>ein | A0A8C5ASS<br>6 | Uncharacterized LOC115534782 OS=Gadus morhua OX=8049<br>GN=si:dkey-174m14.3 PE=4 SV=1            | 5  | 3 | 3 | 3 | 757  | 83.2      | 5.76 | 7.04 | 3 | 1 |
| -<br>6.727E+1<br>8 | IsMasterProt<br>ein | A0A8C5AFT<br>1 | Organic anion transporter X OS=Gadus morhua OX=8049 GN=oatx PE=4<br>SV=1                         | 3  | 2 | 3 | 2 | 587  | 64.9      | 6.9  | 7.04 | 2 | 1 |
| -<br>6.151E+1<br>8 | IsMasterProt<br>ein | A0A8C4YXE<br>2 | Pre-mRNA processing factor 8 OS=Gadus morhua OX=8049 GN=prpf8<br>PE=4 SV=1                       | 2  | 3 | 3 | 3 | 2338 | 273.<br>7 | 8.85 | 7.02 | 3 | 1 |
| -<br>3.835E+1<br>8 | IsMasterProt<br>ein | A0A8C5C1B<br>9 | DNA helicase OS=Gadus morhua OX=8049 GN=chd2 PE=4 SV=1                                           | 2  | 3 | 3 | 3 | 1777 | 202.<br>8 | 7.85 | 7.02 | 3 | 1 |
| -<br>1.678E+1<br>8 | IsMasterProt<br>ein | A0A8C4ZD7<br>4 | Activated RNA polymerase II transcriptional coactivator p15 OS=Gadus<br>morhua OX=8049 PE=3 SV=1 | 15 | 2 | 3 | 2 | 127  | 13.7      | 9.57 | 7.01 | 2 | 1 |
| -<br>9.17E+1<br>8  | IsMasterProt<br>ein | A0A8C5BW<br>B5 | Solute carrier family 12 member 5b OS=Gadus morhua OX=8049 PE=3<br>SV=1                          | 4  | 3 | 3 | 2 | 1131 | 124.<br>1 | 6.92 | 7.01 | 3 | 1 |
| -<br>3.681E+1<br>8 | IsMasterProt<br>ein | A0A8C5CTZ<br>1 | Nuclear FMR1 interacting protein 2 OS=Gadus morhua OX=8049<br>GN=nufip2 PE=4 SV=1                | 7  | 3 | 3 | 3 | 604  | 62.8      | 9.38 | 7.01 | 3 | 1 |
| -<br>7.499E+1<br>8 | IsMasterProt<br>ein | A0A8C4ZJT6     | Ciliogenesis and planar polarity effector 1 OS=Gadus morhua OX=8049<br>GN=cplane1 PE=4 SV=1      | 1  | 3 | 3 | 3 | 3211 | 349.<br>7 | 6.83 | 7.01 | 3 | 1 |
| -<br>6.754E+1<br>8 | IsMasterProt<br>ein | A0A8C5FD6<br>4 | Neuropilin OS=Gadus morhua OX=8049 PE=3 SV=1                                                     | 5  | 3 | 3 | 2 | 870  | 96.9      | 6.06 | 7.01 | 3 | 1 |

|                |                 |            |                                                                                           |    |   |   |   |      |       |       |      |   |   |
|----------------|-----------------|------------|-------------------------------------------------------------------------------------------|----|---|---|---|------|-------|-------|------|---|---|
| -<br>3.951E+18 | IsMasterProtein | A0A8C5CZY0 | Uncharacterized protein OS=Gadus morhua OX=8049 PE=4 SV=1                                 | 9  | 3 | 3 | 2 | 621  | 67.5  | 8.16  | 7    | 3 | 1 |
| 4.1244E+18     | IsMasterProtein | A0A8C4YT38 | EMAP like 6 OS=Gadus morhua OX=8049 GN=EML6 PE=3 SV=1                                     | 2  | 3 | 3 | 2 | 1950 | 216   | 7.46  | 7    | 3 | 1 |
| -<br>2.006E+18 | IsMasterProtein | A0A8C5C6E0 | Chromatin-remodeling ATPase INO80 OS=Gadus morhua OX=8049 GN=ino80 PE=3 SV=1              | 3  | 3 | 3 | 3 | 1486 | 170   | 9.28  | 6.99 | 3 | 1 |
| -<br>5.238E+18 | IsMasterProtein | Q8JHA8     | Ribosomal protein L15 (Fragment) OS=Gadus morhua OX=8049 PE=2 SV=1                        | 21 | 3 | 3 | 3 | 146  | 16.6  | 11.28 | 6.99 | 3 | 1 |
| -<br>1.764E+18 | IsMasterProtein | A0A8C5A4H3 | Myosin motor domain-containing protein OS=Gadus morhua OX=8049 PE=3 SV=1                  | 3  | 3 | 3 | 3 | 2014 | 224.5 | 6.71  | 6.98 | 3 | 1 |
| -<br>7.136E+18 | IsMasterProtein | A0A8C4Z4U4 | Talin 2b OS=Gadus morhua OX=8049 GN=tln2b PE=4 SV=1                                       | 2  | 2 | 2 | 2 | 2393 | 255.7 | 6.04  | 6.98 | 2 | 1 |
| -<br>6.913E+18 | IsMasterProtein | A0A8C4ZF73 | LAM_G_DOMAIN domain-containing protein OS=Gadus morhua OX=8049 PE=4 SV=1                  | 7  | 3 | 3 | 3 | 808  | 78.6  | 5.48  | 6.97 | 3 | 1 |
| -<br>7.921E+18 | IsMasterProtein | A0A8C5BG02 | S-phase cyclin A-associated protein in the ER OS=Gadus morhua OX=8049 GN=scaper PE=4 SV=1 | 3  | 3 | 3 | 2 | 1260 | 142.4 | 7.42  | 6.97 | 3 | 1 |
| -<br>4.437E+18 | IsMasterProtein | A0A8C5D062 | Coagulation factor X OS=Gadus morhua OX=8049 GN=f10 PE=4 SV=1                             | 6  | 3 | 3 | 3 | 525  | 57.4  | 6.92  | 6.97 | 3 | 1 |
| -<br>4.148E+17 | IsMasterProtein | A0A8C5BKL6 | Laminin subunit alpha 3 OS=Gadus morhua OX=8049 GN=LAMA3 PE=4 SV=1                        | 1  | 3 | 3 | 3 | 2688 | 296.5 | 7.65  | 6.96 | 3 | 1 |
| -<br>1.067E+18 | IsMasterProtein | A0A8C4Z0B8 | Zinc finger and BTB domain containing 5 OS=Gadus morhua OX=8049 GN=ZBTB5 PE=4 SV=1        | 8  | 3 | 3 | 3 | 764  | 81.9  | 6.61  | 6.94 | 3 | 1 |
| -<br>7.06E+18  | IsMasterProtein | A0A8C4Z0M0 | Transgelin OS=Gadus morhua OX=8049 GN=TAGLN PE=3 SV=1                                     | 21 | 3 | 3 | 3 | 197  | 21.6  | 8.88  | 6.94 | 3 | 1 |
| 7.5118E+18     | IsMasterProtein | A0A8C4ZF88 | GRB10 interacting GYF protein 1a OS=Gadus morhua OX=8049 PE=4 SV=1                        | 4  | 3 | 3 | 3 | 1117 | 123   | 6.02  | 6.94 | 3 | 1 |
| -<br>3.376E+18 | IsMasterProtein | A0A8C4ZCQ1 | Uncharacterized protein OS=Gadus morhua OX=8049 PE=4 SV=1                                 | 4  | 2 | 3 | 2 | 397  | 45.5  | 7.43  | 6.93 | 2 | 1 |
| -<br>5.802E+18 | IsMasterProtein | A0A8C4ZH76 | Uncharacterized protein OS=Gadus morhua OX=8049 PE=3 SV=1                                 | 2  | 3 | 3 | 3 | 1940 | 223.7 | 6.33  | 6.93 | 3 | 1 |
| -<br>7.715E+18 | IsMasterProtein | A0A8C5C2Q7 | Protein SON-like OS=Gadus morhua OX=8049 GN=LOC115542266 PE=4 SV=1                        | 5  | 3 | 3 | 3 | 1347 | 144.3 | 10.95 | 6.92 | 3 | 1 |
| 6.0862E+18     | IsMasterProtein | A0A8C5AD50 | Centrosomal protein 83 OS=Gadus morhua OX=8049 GN=cep83 PE=4 SV=1                         | 3  | 2 | 3 | 2 | 718  | 82.6  | 7.15  | 6.92 | 2 | 1 |
| -<br>4.986E+18 | IsMasterProtein | A0A8C5BR09 | PDZ domain containing 2 OS=Gadus morhua OX=8049 GN=pdzd2 PE=4 SV=1                        | 2  | 3 | 3 | 3 | 2374 | 254.9 | 7.2   | 6.91 | 3 | 1 |
| -<br>8.007E+18 | IsMasterProtein | A0A8C5ATF8 | Fibrosin-like 1 OS=Gadus morhua OX=8049 GN=fbrsl1 PE=4 SV=1                               | 4  | 3 | 3 | 3 | 1307 | 145   | 9.69  | 6.89 | 3 | 1 |
| -<br>8.537E+18 | IsMasterProtein | A0A8C5CN75 | Uncharacterized protein OS=Gadus morhua OX=8049 PE=4 SV=1                                 | 4  | 3 | 3 | 3 | 935  | 95.4  | 7.85  | 6.89 | 3 | 1 |

|                |                 |            |                                                                                                                                      |    |   |   |   |      |       |       |      |   |   |
|----------------|-----------------|------------|--------------------------------------------------------------------------------------------------------------------------------------|----|---|---|---|------|-------|-------|------|---|---|
| -<br>7.603E+18 | IsMasterProtein | A0A8C5BLI5 | Un-named hu7910 OS=Gadus morhua OX=8049 GN=unm_hu7910 PE=4 SV=1                                                                      | 6  | 3 | 3 | 2 | 1195 | 144.4 | 9.36  | 6.88 | 3 | 1 |
| -<br>7.834E+18 | IsMasterProtein | A0A8C5F562 | Uncharacterized protein OS=Gadus morhua OX=8049 PE=3 SV=1                                                                            | 3  | 3 | 3 | 3 | 1137 | 129   | 6.24  | 6.88 | 3 | 1 |
| 5.0178E+18     | IsMasterProtein | A0A8C5CCU8 | Serine/threonine-protein kinase 40 OS=Gadus morhua OX=8049 GN=stk40 PE=4 SV=1                                                        | 10 | 3 | 3 | 3 | 437  | 49    | 7.99  | 6.88 | 3 | 1 |
| 8.6876E+18     | IsMasterProtein | A0A8C4ZAM7 | Golgi integral membrane protein 4a OS=Gadus morhua OX=8049 GN=golim4a PE=4 SV=1                                                      | 4  | 3 | 3 | 3 | 719  | 83.5  | 4.82  | 6.87 | 3 | 1 |
| -<br>8.645E+18 | IsMasterProtein | A0A8C4Z073 | Protein-synthesizing GTPase OS=Gadus morhua OX=8049 GN=EIF2S3 PE=4 SV=1                                                              | 7  | 3 | 3 | 3 | 472  | 51.3  | 8.28  | 6.84 | 3 | 1 |
| -<br>7.146E+17 | IsMasterProtein | A0A8C5BMI4 | EWS RNA binding protein 1 OS=Gadus morhua OX=8049 GN=ewsr1 PE=3 SV=1                                                                 | 5  | 2 | 2 | 2 | 604  | 63.1  | 9.47  | 6.84 | 2 | 1 |
| -<br>7.309E+18 | IsMasterProtein | A0A8C5A9R1 | Protein-tyrosine-phosphatase OS=Gadus morhua OX=8049 PE=3 SV=1                                                                       | 2  | 2 | 3 | 2 | 1343 | 150.9 | 6.52  | 6.84 | 2 | 1 |
| -<br>8.774E+18 | IsMasterProtein | A0A8C4ZAR8 | 40S ribosomal protein S15 OS=Gadus morhua OX=8049 GN=rps15 PE=3 SV=1                                                                 | 9  | 2 | 2 | 2 | 145  | 17    | 10.23 | 6.84 | 2 | 1 |
| -<br>9.115E+18 | IsMasterProtein | A0A8C4ZXJ2 | Potassium intermediate/small conductance calcium-activated channel, subfamily N, member 3 OS=Gadus morhua OX=8049 GN=kenn3 PE=4 SV=1 | 6  | 3 | 3 | 3 | 846  | 90.7  | 9.42  | 6.83 | 3 | 1 |
| -<br>6.756E+18 | IsMasterProtein | A0A8C5A6C6 | TTF-type domain-containing protein OS=Gadus morhua OX=8049 PE=4 SV=1                                                                 | 5  | 2 | 3 | 2 | 731  | 83.1  | 7.83  | 6.83 | 2 | 1 |
| -<br>7.03E+18  | IsMasterProtein | A0A8C5BPS6 | Lysine (K)-specific demethylase 3B OS=Gadus morhua OX=8049 GN=kdm3b PE=4 SV=1                                                        | 2  | 2 | 3 | 2 | 1566 | 169.6 | 7.15  | 6.82 | 2 | 1 |
| 5.2879E+18     | IsMasterProtein | A0A8C4ZSH5 | Peptidyl-prolyl cis-trans isomerase OS=Gadus morhua OX=8049 GN=ppib PE=3 SV=1                                                        | 13 | 2 | 2 | 2 | 216  | 23.9  | 9.32  | 6.82 | 2 | 1 |
| -<br>9.213E+18 | IsMasterProtein | A0A8C5BYH6 | Uncharacterized protein OS=Gadus morhua OX=8049 PE=4 SV=1                                                                            | 8  | 2 | 2 | 2 | 336  | 36.3  | 7.88  | 6.81 | 2 | 1 |
| -<br>2.132E+18 | IsMasterProtein | A0A8C5ANT1 | Dedicator of cytokinesis 9 OS=Gadus morhua OX=8049 GN=DOCK9 PE=3 SV=1                                                                | 2  | 3 | 3 | 3 | 2132 | 241.3 | 7.96  | 6.81 | 3 | 1 |
| 9.6214E+17     | IsMasterProtein | A0A8C4Z2S9 | Uncharacterized protein OS=Gadus morhua OX=8049 PE=3 SV=1                                                                            | 4  | 2 | 2 | 2 | 1336 | 150.7 | 6.48  | 6.8  | 2 | 1 |
| 7.495E+17      | IsMasterProtein | A0A8C5CKX6 | Gap junction protein OS=Gadus morhua OX=8049 GN=LOC115531510 PE=3 SV=1                                                               | 6  | 3 | 3 | 3 | 482  | 51.5  | 7.01  | 6.79 | 3 | 1 |
| 1.7653E+18     | IsMasterProtein | A0A8C4YTT3 | Serine and arginine rich splicing factor 5b OS=Gadus morhua OX=8049 PE=4 SV=1                                                        | 18 | 3 | 3 | 3 | 168  | 18.9  | 9.77  | 6.79 | 3 | 1 |
| -<br>8.026E+18 | IsMasterProtein | A0A8C5BK41 | CW-type domain-containing protein OS=Gadus morhua OX=8049 PE=4 SV=1                                                                  | 6  | 3 | 3 | 3 | 840  | 95.2  | 9.07  | 6.78 | 3 | 1 |
| 1.8541E+18     | IsMasterProtein | A0A8C5B5U1 | Leucine zipper, putative tumor suppressor family member 3b OS=Gadus morhua OX=8049 GN=lzts3b PE=4 SV=1                               | 4  | 3 | 4 | 3 | 1042 | 117.2 | 6.92  | 6.75 | 3 | 1 |
| -<br>5.509E+18 | IsMasterProtein | A0A8C5A422 | Uncharacterized protein OS=Gadus morhua OX=8049 PE=4 SV=1                                                                            | 2  | 3 | 3 | 3 | 2378 | 261.3 | 5.01  | 6.73 | 3 | 1 |
| 8.7885E+17     | IsMasterProtein | A0A8C5B5Z4 | NIMA-related kinase 4 OS=Gadus morhua OX=8049 PE=4 SV=1                                                                              | 5  | 3 | 3 | 3 | 859  | 95.3  | 8.1   | 6.73 | 3 | 1 |
| 8.9423E+18     | IsMasterProtein | A0A8C5CFA0 | Platelet-derived growth factor receptor-like protein OS=Gadus morhua OX=8049 GN=LOC115552417 PE=4 SV=1                               | 9  | 2 | 2 | 2 | 390  | 42.8  | 8.75  | 6.73 | 2 | 1 |

|                |                 |            |                                                                                                         |    |   |   |   |      |       |      |      |   |   |
|----------------|-----------------|------------|---------------------------------------------------------------------------------------------------------|----|---|---|---|------|-------|------|------|---|---|
| -<br>8.428E+18 | IsMasterProtein | A0A8C4Z0S8 | Thymidine kinase 2 OS=Gadus morhua OX=8049 GN=tk2 PE=3 SV=1                                             | 25 | 2 | 2 | 2 | 219  | 25.6  | 6.21 | 6.71 | 2 | 1 |
| 1.1223E+17     | IsMasterProtein | A0A8C4Z8Q3 | Complement component C9 OS=Gadus morhua OX=8049 PE=3 SV=1                                               | 5  | 2 | 2 | 2 | 574  | 63.9  | 6.13 | 6.71 | 2 | 1 |
| -<br>6.323E+18 | IsMasterProtein | A0A8C5CLM4 | D-3-phosphoglycerate dehydrogenase OS=Gadus morhua OX=8049 GN=phgdh PE=3 SV=1                           | 5  | 2 | 2 | 2 | 528  | 54.8  | 7.31 | 6.67 | 2 | 1 |
| 2.3447E+18     | IsMasterProtein | A0A8C4ZDL6 | 40S ribosomal protein S28 OS=Gadus morhua OX=8049 GN=tps28 PE=3 SV=1                                    | 33 | 2 | 2 | 2 | 69   | 7.8   | 10.7 | 6.62 | 2 | 1 |
| 8.0276E+18     | IsMasterProtein | A0A8C5B0D4 | [Histone H3]-trimethyl-L-lysine(9) demethylase OS=Gadus morhua OX=8049 GN=kdm4aa PE=3 SV=1              | 5  | 2 | 2 | 2 | 885  | 100.9 | 7.18 | 6.6  | 2 | 1 |
| 7.0076E+18     | IsMasterProtein | A0A8C4ZJJ2 | Adenylate cyclase 9 OS=Gadus morhua OX=8049 PE=3 SV=1                                                   | 4  | 2 | 2 | 2 | 1364 | 150   | 7.17 | 6.59 | 2 | 1 |
| 1.1128E+18     | IsMasterProtein | A0A8C4ZD29 | Uncharacterized protein OS=Gadus morhua OX=8049 PE=4 SV=1                                               | 4  | 2 | 2 | 2 | 1072 | 118.7 | 5.53 | 6.59 | 2 | 1 |
| 4.5582E+18     | IsMasterProtein | A0A8C4Z2D5 | Integral membrane protein 2 OS=Gadus morhua OX=8049 GN=ITM2B PE=3 SV=1                                  | 13 | 2 | 2 | 2 | 262  | 30.3  | 5.15 | 6.54 | 2 | 1 |
| -<br>7.097E+17 | IsMasterProtein | A0A8C5FFK1 | Polypeptide N-acetylgalactosaminyltransferase OS=Gadus morhua OX=8049 GN=GALNT15 PE=3 SV=1              | 7  | 2 | 2 | 2 | 627  | 70.1  | 5.81 | 6.53 | 2 | 1 |
| -<br>1.677E+18 | IsMasterProtein | A0A8C5BA02 | Calcium/calmodulin-dependent protein kinase OS=Gadus morhua OX=8049 GN=LOC115530649 PE=3 SV=1           | 6  | 3 | 3 | 2 | 488  | 55.3  | 7.3  | 6.51 | 3 | 1 |
| -<br>6.917E+18 | IsMasterProtein | A0A8C5CHG4 | Voltage-dependent T-type calcium channel subunit alpha OS=Gadus morhua OX=8049 PE=3 SV=1                | 2  | 3 | 3 | 3 | 1865 | 205.7 | 8.25 | 6.51 | 3 | 1 |
| 2.2974E+18     | IsMasterProtein | A0A8C4YZQ2 | DNA replication licensing factor MCM6 OS=Gadus morhua OX=8049 PE=3 SV=1                                 | 7  | 2 | 2 | 2 | 832  | 93.3  | 5.4  | 6.49 | 2 | 1 |
| -<br>8.799E+18 | IsMasterProtein | A0A8C5CNB9 | Kinectin 1 OS=Gadus morhua OX=8049 GN=ktn1 PE=4 SV=1                                                    | 4  | 2 | 2 | 2 | 1157 | 129.4 | 5.66 | 6.45 | 2 | 1 |
| 5.9913E+18     | IsMasterProtein | A0A8C5FMY1 | Uncharacterized protein OS=Gadus morhua OX=8049 PE=3 SV=1                                               | 1  | 3 | 3 | 3 | 3928 | 435.1 | 5.22 | 6.45 | 3 | 1 |
| -<br>2.559E+18 | IsMasterProtein | A0A8C4Z6X4 | Codanin-1_C domain-containing protein OS=Gadus morhua OX=8049 PE=4 SV=1                                 | 6  | 3 | 3 | 3 | 690  | 75.8  | 8.13 | 6.45 | 3 | 1 |
| -<br>8.187E+18 | IsMasterProtein | A0A8C5FJA2 | Cystatin fetuin-A-type domain-containing protein OS=Gadus morhua OX=8049 PE=4 SV=1                      | 11 | 2 | 2 | 2 | 347  | 36.4  | 4.82 | 6.44 | 2 | 1 |
| -<br>8.772E+18 | IsMasterProtein | A0A8C5F9R1 | Ral guanine nucleotide dissociation stimulator-like 1 OS=Gadus morhua OX=8049 GN=LOC115561811 PE=4 SV=1 | 7  | 2 | 2 | 2 | 750  | 82.1  | 6.38 | 6.43 | 2 | 1 |
| -<br>6.718E+18 | IsMasterProtein | A0A8C5CAV3 | H15 domain-containing protein OS=Gadus morhua OX=8049 PE=3 SV=1                                         | 19 | 3 | 3 | 2 | 187  | 19.7  | 10.8 | 6.4  | 3 | 1 |
| 7.0665E+18     | IsMasterProtein | A0A8C5AWQ5 | Craniofacial development protein 1 OS=Gadus morhua OX=8049 GN=cfdp1 PE=4 SV=1                           | 14 | 2 | 2 | 2 | 318  | 35.3  | 5.36 | 6.4  | 2 | 1 |
| -<br>6.837E+18 | IsMasterProtein | A0A8C5FUZ5 | Mediator of RNA polymerase II transcription subunit 1 OS=Gadus morhua OX=8049 GN=MED1 PE=3 SV=1         | 3  | 2 | 2 | 2 | 1877 | 191.6 | 8.68 | 6.39 | 2 | 1 |
| -<br>2.416E+18 | IsMasterProtein | A0A8C4Z5B5 | DnaJ heat shock protein family (Hsp40) member C13 OS=Gadus morhua OX=8049 GN=dnajc13 PE=4 SV=1          | 1  | 3 | 3 | 3 | 2297 | 259.1 | 6.77 | 6.39 | 3 | 1 |
| 3.9244E+18     | IsMasterProtein | A0A8C5BP57 | Uncharacterized protein OS=Gadus morhua OX=8049 PE=4 SV=1                                               | 6  | 2 | 2 | 2 | 877  | 90.9  | 7.02 | 6.37 | 2 | 1 |

|                |                 |             |                                                                                  |    |   |   |   |      |       |       |      |   |   |
|----------------|-----------------|-------------|----------------------------------------------------------------------------------|----|---|---|---|------|-------|-------|------|---|---|
| -<br>9.137E+18 | IsMasterProtein | A0A8C4ZGQ6  | Solute carrier family 25 member 42 OS=Gadus morhua OX=8049 GN=slc25a42 PE=3 SV=1 | 21 | 2 | 2 | 2 | 323  | 35.2  | 9.99  | 6.35 | 2 | 1 |
| -<br>8.444E+18 | IsMasterProtein | A0A8C5FBZ1  | Otoferlin a OS=Gadus morhua OX=8049 PE=4 SV=1                                    | 4  | 2 | 2 | 2 | 1577 | 179.9 | 6.34  | 6.35 | 2 | 1 |
| 3.7371E+18     | IsMasterProtein | A0A8C5ADP7  | Claspin OS=Gadus morhua OX=8049 GN=CLSPN PE=4 SV=1                               | 4  | 2 | 2 | 2 | 1361 | 148.6 | 4.73  | 6.34 | 2 | 1 |
| -<br>4.932E+17 | IsMasterProtein | A0A8C5ASU3  | Ribosomal protein L3 OS=Gadus morhua OX=8049 GN=rp13 PE=3 SV=1                   | 10 | 3 | 3 | 3 | 253  | 29    | 10.04 | 6.32 | 3 | 1 |
| -<br>8.638E+18 | IsMasterProtein | A0A8C5AK27  | M-phase phosphoprotein 8 OS=Gadus morhua OX=8049 GN=mposph8 PE=4 SV=1            | 1  | 2 | 3 | 2 | 1454 | 164.1 | 5.85  | 6.31 | 2 | 1 |
| 4.6125E+18     | IsMasterProtein | A0A8C5AF12  | BTB (POZ) domain containing 11a OS=Gadus morhua OX=8049 PE=4 SV=1                | 5  | 2 | 2 | 2 | 919  | 100.8 | 6.79  | 6.3  | 2 | 1 |
| -<br>2.099E+18 | IsMasterProtein | A0A8C4ZUZ7  | Uncharacterized protein OS=Gadus morhua OX=8049 PE=4 SV=1                        | 2  | 2 | 2 | 2 | 3520 | 383.3 | 6.6   | 6.29 | 2 | 1 |
| 3.9533E+18     | IsMasterProtein | A0A8C5B394  | Aldedh domain-containing protein OS=Gadus morhua OX=8049 PE=3 SV=1               | 5  | 2 | 2 | 2 | 522  | 56.4  | 7.11  | 6.29 | 2 | 1 |
| -<br>7.295E+18 | IsMasterProtein | A0A8C5CIZ7  | Kinase OS=Gadus morhua OX=8049 GN=itpkcb PE=3 SV=1                               | 5  | 3 | 3 | 3 | 682  | 75    | 6.02  | 6.29 | 3 | 1 |
| 6.2002E+16     | IsMasterProtein | A0A8C4Z0D9  | Zinc fingers and homeoboxes 3 OS=Gadus morhua OX=8049 GN=zhx3 PE=3 SV=1          | 5  | 2 | 2 | 2 | 1206 | 127   | 8.81  | 6.25 | 2 | 1 |
| 2.049E+18      | IsMasterProtein | A0A8C5CQP8  | Chromosome 8 C7orf25 homolog OS=Gadus morhua OX=8049 GN=c8h7orf25 PE=3 SV=1      | 7  | 2 | 2 | 2 | 457  | 50.5  | 4.79  | 6.25 | 2 | 1 |
| -<br>8.384E+18 | IsMasterProtein | A0A8C5B1N6  | Collagen, type XI, alpha 2 OS=Gadus morhua OX=8049 PE=4 SV=1                     | 2  | 2 | 2 | 2 | 1367 | 138.4 | 6.86  | 6.24 | 2 | 1 |
| -<br>5.232E+18 | IsMasterProtein | A0A8C4Z6M8  | Non-specific protein-tyrosine kinase OS=Gadus morhua OX=8049 GN=tnk1 PE=4 SV=1   | 5  | 2 | 2 | 2 | 771  | 85.8  | 9.04  | 6.23 | 2 | 1 |
| -<br>6.772E+18 | IsMasterProtein | A0A8C5A0T9  | Thrombomodulin OS=Gadus morhua OX=8049 PE=4 SV=1                                 | 5  | 2 | 2 | 2 | 463  | 48.8  | 5.12  | 6.23 | 2 | 1 |
| -<br>5.667E+18 | IsMasterProtein | A0A8C4ZF34  | Uridine/cytidine kinase OS=Gadus morhua OX=8049 GN=uck2b PE=3 SV=1               | 20 | 2 | 2 | 2 | 233  | 26.9  | 7.23  | 6.22 | 2 | 1 |
| -<br>7.735E+18 | IsMasterProtein | A0A8C5BZP7  | Stathmin OS=Gadus morhua OX=8049 GN=stmn1 PE=3 SV=1                              | 24 | 2 | 2 | 2 | 150  | 17.4  | 7.55  | 6.22 | 2 | 1 |
| 5.5417E+17     | IsMasterProtein | A0A8C5A5J4  | Uncharacterized protein OS=Gadus morhua OX=8049 PE=4 SV=1                        | 6  | 2 | 2 | 2 | 944  | 103   | 7.05  | 6.2  | 2 | 1 |
| 2.0031E+18     | IsMasterProtein | A0A8C5C220  | Formin-like 1a OS=Gadus morhua OX=8049 PE=3 SV=1                                 | 4  | 2 | 2 | 2 | 955  | 106.5 | 6.52  | 6.18 | 2 | 1 |
| -<br>6.935E+18 | IsMasterProtein | cRAP_O00762 | Ubiquitin-conjugating enzyme E2 C OS=Homo sapiens GN=UBE2C PE=1 SV=1             | 15 | 2 | 2 | 2 | 179  | 19.6  | 7.37  | 6.17 | 2 | 1 |
| 5.7505E+18     | IsMasterProtein | A0A8C5CQ76  | NACHT domain-containing protein OS=Gadus morhua OX=8049 PE=4 SV=1                | 9  | 2 | 2 | 2 | 719  | 81.8  | 7.46  | 6.16 | 2 | 1 |
| -<br>7.961E+18 | IsMasterProtein | A0A8C5A3M8  | Protein RIC1 homolog OS=Gadus morhua OX=8049 GN=ric1 PE=4 SV=1                   | 5  | 2 | 2 | 2 | 1470 | 160.4 | 6.01  | 6.16 | 2 | 1 |



|                    |                     |                 |                                                                                                         |    |   |   |   |      |           |      |      |   |   |
|--------------------|---------------------|-----------------|---------------------------------------------------------------------------------------------------------|----|---|---|---|------|-----------|------|------|---|---|
| -<br>2.163E+1<br>7 | IsMasterProt<br>ein | A0A8C5FE29      | Runt-related transcription factor OS=Gadus morhua OX=8049 PE=4 SV=1                                     | 10 | 2 | 2 | 2 | 476  | 50.8      | 9.36 | 6.15 | 2 | 1 |
| 6.5006E+<br>18     | IsMasterProt<br>ein | A0A8C5AD5<br>3  | KRAP_IP3R_bind domain-containing protein OS=Gadus morhua OX=8049 PE=4 SV=1                              | 4  | 2 | 2 | 2 | 1503 | 156.<br>9 | 5.08 | 6.15 | 2 | 1 |
| -<br>1.985E+1<br>8 | IsMasterProt<br>ein | A0A8C4YX9<br>2  | Glutamate receptor OS=Gadus morhua OX=8049 GN=si:ch211-251b21.1 PE=3 SV=1                               | 7  | 2 | 2 | 2 | 460  | 50.3      | 5.96 | 6.14 | 2 | 1 |
| -<br>2.762E+1<br>8 | IsMasterProt<br>ein | cRAP_P6887<br>1 | Hemoglobin subunit beta OS=Homo sapiens GN=HBB PE=1 SV=2                                                | 16 | 2 | 2 | 2 | 147  | 16        | 7.28 | 6.14 | 2 | 1 |
| 1.4241E+<br>18     | IsMasterProt<br>ein | A0A8C5AA8<br>0  | Uncharacterized protein OS=Gadus morhua OX=8049 PE=4 SV=1                                               | 6  | 2 | 2 | 2 | 399  | 44        | 6.2  | 6.14 | 2 | 1 |
| -<br>5.603E+1<br>8 | IsMasterProt<br>ein | A0A8C5FPF6      | Malic enzyme OS=Gadus morhua OX=8049 GN=me1 PE=3 SV=1                                                   | 8  | 2 | 2 | 2 | 566  | 63.1      | 6.13 | 6.13 | 2 | 1 |
| 8.9112E+<br>17     | IsMasterProt<br>ein | A0A8C5ANS<br>0  | Uncharacterized protein OS=Gadus morhua OX=8049 PE=4 SV=1                                               | 7  | 2 | 2 | 2 | 854  | 94.2      | 6.01 | 6.11 | 2 | 1 |
| -<br>8.998E+1<br>8 | IsMasterProt<br>ein | A0A8C5AGV<br>7  | Uncharacterized protein OS=Gadus morhua OX=8049 PE=4 SV=1                                               | 8  | 2 | 2 | 2 | 617  | 69        | 9    | 6.1  | 2 | 1 |
| -<br>1.642E+1<br>8 | IsMasterProt<br>ein | A0A8C4Z698      | Mitochondrial ribosomal protein L4 OS=Gadus morhua OX=8049 GN=mrpl4 PE=3 SV=1                           | 16 | 2 | 2 | 2 | 285  | 31.8      | 9.55 | 6.1  | 2 | 1 |
| 4.4552E+<br>18     | IsMasterProt<br>ein | A0A8C5BXD<br>5  | Transmembrane protein 200A OS=Gadus morhua OX=8049 GN=tmem200a PE=3 SV=1                                | 10 | 2 | 2 | 2 | 589  | 62.2      | 9.85 | 6.1  | 2 | 1 |
| -<br>7.219E+1<br>8 | IsMasterProt<br>ein | A0A8C5C5X<br>4  | RNA helicase OS=Gadus morhua OX=8049 PE=4 SV=1                                                          | 5  | 2 | 4 | 2 | 1188 | 135.<br>2 | 6.96 | 6.09 | 2 | 1 |
| -<br>7.596E+1<br>8 | IsMasterProt<br>ein | A0A8C5C7D<br>7  | Folate gamma-glutamyl hydrolase OS=Gadus morhua OX=8049 GN=LOC115537226 PE=3 SV=1                       | 10 | 2 | 2 | 2 | 334  | 37.3      | 6.07 | 6.09 | 2 | 1 |
| -<br>9.08E+18      | IsMasterProt<br>ein | A0A8C5A7L<br>2  | EBNA1 binding protein 2 OS=Gadus morhua OX=8049 GN=EBNA1BP2 PE=3 SV=1                                   | 8  | 2 | 2 | 2 | 324  | 36.4      | 9.74 | 6.08 | 2 | 1 |
| -<br>2.027E+1<br>7 | IsMasterProt<br>ein | A0A8C5B2C<br>9  | Eukaryotic translation initiation factor 3 subunit F OS=Gadus morhua OX=8049 GN=EIF3F PE=3 SV=1         | 7  | 2 | 2 | 2 | 329  | 36.2      | 5.6  | 6.06 | 2 | 1 |
| -<br>7.198E+1<br>8 | IsMasterProt<br>ein | A0A8C5CUV<br>6  | Serine/threonine-protein phosphatase OS=Gadus morhua OX=8049 PE=3 SV=1                                  | 14 | 2 | 2 | 2 | 328  | 37.2      | 6.19 | 6.06 | 2 | 1 |
| -<br>7.051E+1<br>8 | IsMasterProt<br>ein | A0A8C5BEC<br>4  | Serine/threonine-protein phosphatase OS=Gadus morhua OX=8049 GN=ppp1caa PE=3 SV=1                       | 15 | 2 | 2 | 2 | 329  | 37.2      | 6.99 | 6.06 | 2 | 1 |
| -<br>2.633E+1<br>8 | IsMasterProt<br>ein | A0A8C5BAG<br>6  | Transcription activation suppressor a OS=Gadus morhua OX=8049 PE=3 SV=1                                 | 3  | 2 | 2 | 2 | 1767 | 192.<br>1 | 6.06 | 6.06 | 2 | 1 |
| -<br>7.735E+1<br>8 | IsMasterProt<br>ein | A0A8C4Z9D<br>2  | AT-rich interactive domain-containing protein 3B-like OS=Gadus morhua OX=8049 GN=LOC115558176 PE=4 SV=1 | 7  | 2 | 2 | 2 | 633  | 67.5      | 5.9  | 6.05 | 2 | 1 |
| 7.2429E+<br>18     | IsMasterProt<br>ein | A0A8C5BJN<br>6  | Carboxylic ester hydrolase OS=Gadus morhua OX=8049 PE=3 SV=1                                            | 7  | 2 | 2 | 2 | 555  | 61.4      | 7.25 | 6.05 | 2 | 1 |
| 7.3437E+<br>17     | IsMasterProt<br>ein | A0A8C5B1F<br>5  | Uncharacterized LOC115530913 OS=Gadus morhua OX=8049 GN=si:ch211-183d21.1 PE=4 SV=1                     | 4  | 2 | 2 | 2 | 932  | 98.4      | 5.45 | 6.05 | 2 | 1 |
| -<br>3.674E+1<br>8 | IsMasterProt<br>ein | cRAP_P0266<br>3 | Alpha-S2-casein OS=Bos taurus GN=CSN1S2 PE=1 SV=2                                                       | 14 | 2 | 2 | 2 | 222  | 26        | 8.43 | 6.04 | 2 | 1 |

|            |                 |            |                                                                                                                                    |    |   |   |   |      |       |       |      |   |   |
|------------|-----------------|------------|------------------------------------------------------------------------------------------------------------------------------------|----|---|---|---|------|-------|-------|------|---|---|
| 5.1334E+18 | IsMasterProtein | A0A8C5D0L0 | Actinin, alpha 2b OS=Gadus morhua OX=8049 PE=3 SV=1                                                                                | 6  | 2 | 2 | 2 | 891  | 102.7 | 5.27  | 6.03 | 2 | 1 |
| 3.6063E+17 | IsMasterProtein | A0A8C5FDE4 | Mitogen-activated protein kinase kinase kinase OS=Gadus morhua OX=8049 PE=3 SV=1                                                   | 4  | 2 | 2 | 2 | 1283 | 144.9 | 6.67  | 6.03 | 2 | 1 |
| 6.7657E+18 | IsMasterProtein | A0A8C5FDF9 | Tyrosine-protein kinase OS=Gadus morhua OX=8049 GN=ab11 PE=3 SV=1                                                                  | 5  | 2 | 2 | 2 | 1072 | 118.3 | 9.1   | 6.03 | 2 | 1 |
| 1.9202E+18 | IsMasterProtein | A0A8C4ZKS2 | Uncharacterized protein OS=Gadus morhua OX=8049 PE=4 SV=1                                                                          | 4  | 2 | 2 | 2 | 971  | 104.9 | 5.72  | 6.03 | 2 | 1 |
| -5.269E+16 | IsMasterProtein | A0A8C4ZTH4 | Hydroxyacyl-CoA dehydrogenase OS=Gadus morhua OX=8049 PE=3 SV=1                                                                    | 12 | 2 | 2 | 2 | 313  | 33.8  | 7.97  | 6.02 | 2 | 1 |
| 6.6823E+18 | IsMasterProtein | A0A8C5FDS1 | RNA binding motif protein 15B OS=Gadus morhua OX=8049 GN=rbm15b PE=3 SV=1                                                          | 5  | 2 | 2 | 2 | 884  | 99.2  | 10.04 | 6.02 | 2 | 1 |
| -5.984E+18 | IsMasterProtein | A0A8C5C883 | Fatty acid desaturase 2 OS=Gadus morhua OX=8049 GN=fads2 PE=3 SV=1                                                                 | 11 | 2 | 2 | 2 | 441  | 51.2  | 8.32  | 6.01 | 2 | 1 |
| -2.595E+18 | IsMasterProtein | A0A8C5C8A3 | KIAA1328 ortholog OS=Gadus morhua OX=8049 GN=kiaa1328 PE=4 SV=1                                                                    | 8  | 2 | 2 | 2 | 516  | 57    | 6.68  | 6.01 | 2 | 1 |
| 4.6139E+18 | IsMasterProtein | A0A8C5CMK0 | Eukaryotic translation initiation factor 3 subunit H OS=Gadus morhua OX=8049 GN=eif3h PE=3 SV=1                                    | 13 | 2 | 2 | 2 | 359  | 41.1  | 5.87  | 6    | 2 | 1 |
| -5.612E+18 | IsMasterProtein | A0A8C5CTG8 | Fermitin family member 1 OS=Gadus morhua OX=8049 PE=3 SV=1                                                                         | 7  | 2 | 2 | 2 | 686  | 79.1  | 6.46  | 5.99 | 2 | 1 |
| -6.932E+18 | IsMasterProtein | A0A8C4YYB0 | Cystic fibrosis transmembrane conductance regulator OS=Gadus morhua OX=8049 GN=cftr PE=3 SV=1                                      | 4  | 2 | 2 | 2 | 1460 | 163.9 | 8.16  | 5.98 | 2 | 1 |
| -8.5E+18   | IsMasterProtein | A0A8C4ZVR3 | Rho GTPase activating protein 31 OS=Gadus morhua OX=8049 GN=arhgap31 PE=4 SV=1                                                     | 4  | 2 | 2 | 2 | 1443 | 156.6 | 8.76  | 5.96 | 2 | 1 |
| 9.5339E+17 | IsMasterProtein | A0A8C5APL5 | FAT atypical cadherin 3a OS=Gadus morhua OX=8049 GN=fat3a PE=4 SV=1                                                                | 1  | 2 | 2 | 2 | 4685 | 509.3 | 4.91  | 5.96 | 2 | 1 |
| 2.4693E+18 | IsMasterProtein | A0A8C4ZV08 | BRO1 domain-containing protein BROX OS=Gadus morhua OX=8049 GN=brox PE=3 SV=1                                                      | 10 | 2 | 2 | 2 | 379  | 43.1  | 7.36  | 5.96 | 2 | 1 |
| 9.7046E+16 | IsMasterProtein | A0A8C5C9C6 | Ependymin-1-like OS=Gadus morhua OX=8049 GN=LOC115546638 PE=3 SV=1                                                                 | 15 | 2 | 2 | 2 | 214  | 23.1  | 5.72  | 5.95 | 2 | 1 |
| -9.022E+18 | IsMasterProtein | A0A8C5BHS2 | Uncharacterized protein OS=Gadus morhua OX=8049 PE=3 SV=1                                                                          | 3  | 2 | 2 | 2 | 1555 | 173.7 | 6.39  | 5.95 | 2 | 1 |
| 8.696E+16  | IsMasterProtein | A0A8C4ZF08 | Uncharacterized protein OS=Gadus morhua OX=8049 PE=3 SV=1                                                                          | 7  | 2 | 2 | 2 | 325  | 35.5  | 5.3   | 5.94 | 2 | 1 |
| -7.052E+18 | IsMasterProtein | A0A8C5ARC1 | Adaptor protein, phosphotyrosine interaction, PH domain and leucine zipper containing 2 OS=Gadus morhua OX=8049 GN=appl2 PE=4 SV=1 | 9  | 2 | 2 | 2 | 662  | 74.1  | 4.97  | 5.93 | 2 | 1 |
| -7.163E+18 | IsMasterProtein | A0A8C5FF67 | RAN binding protein 3b OS=Gadus morhua OX=8049 GN=ranbp3b PE=4 SV=1                                                                | 9  | 2 | 2 | 2 | 510  | 54.8  | 5.07  | 5.93 | 2 | 1 |
| 7.1931E+18 | IsMasterProtein | A0A8C5FA76 | Leucine-rich repeat neuronal protein 3-like OS=Gadus morhua OX=8049 GN=LOC115532564 PE=4 SV=1                                      | 6  | 2 | 2 | 2 | 709  | 79.3  | 6.06  | 5.92 | 2 | 1 |
| -5.655E+18 | IsMasterProtein | A0A8C5D5V4 | Exosome component 7 OS=Gadus morhua OX=8049 GN=exosc7 PE=4 SV=1                                                                    | 14 | 2 | 2 | 2 | 406  | 43.2  | 4.79  | 5.91 | 2 | 1 |
| -9.087E+18 | IsMasterProtein | A0A8C5C813 | A kinase (PRKA) anchor protein 12a OS=Gadus morhua OX=8049 GN=akap12a PE=4 SV=1                                                    | 1  | 2 | 2 | 2 | 3691 | 404.3 | 4.23  | 5.9  | 2 | 1 |
| -4.426E+18 | IsMasterProtein | A0A8C4ZQB6 | Protein-L-isoaspartate (D-aspartate) O-methyltransferase OS=Gadus morhua OX=8049 GN=PCMT1 PE=3 SV=1                                | 17 | 2 | 2 | 2 | 265  | 28.5  | 7.59  | 5.9  | 2 | 1 |

|            |                 |             |                                                                                                       |    |   |   |   |      |       |      |      |   |   |
|------------|-----------------|-------------|-------------------------------------------------------------------------------------------------------|----|---|---|---|------|-------|------|------|---|---|
| 2.0496E+18 | IsMasterProtein | A0A8C5F5L5  | DEP domain-containing protein OS=Gadus morhua OX=8049 PE=4 SV=1                                       | 4  | 2 | 2 | 2 | 1321 | 146.9 | 7.14 | 5.89 | 2 | 1 |
| 5.942E+18  | IsMasterProtein | A0A8C5FJX3  | Poly [ADP-ribose] polymerase OS=Gadus morhua OX=8049 PE=3 SV=1                                        | 5  | 2 | 2 | 2 | 846  | 94.5  | 8.76 | 5.89 | 2 | 1 |
| 8.252E+18  | IsMasterProtein | A0A8C4Z1Z7  | ATP synthase subunit b OS=Gadus morhua OX=8049 GN=atp5pb PE=3 SV=1                                    | 10 | 2 | 2 | 2 | 251  | 27.5  | 9.16 | 5.89 | 2 | 1 |
| 2.7038E+17 | IsMasterProtein | A0A8C5F7B6  | G protein-coupled receptor kinase OS=Gadus morhua OX=8049 PE=3 SV=1                                   | 8  | 2 | 2 | 2 | 600  | 68.4  | 6.38 | 5.89 | 2 | 1 |
| 7.8522E+18 | IsMasterProtein | A0A8C5BUW1  | Protein SHQ1 homolog OS=Gadus morhua OX=8049 GN=shq1 PE=3 SV=1                                        | 7  | 2 | 2 | 2 | 625  | 68.3  | 4.88 | 5.88 | 2 | 1 |
| 9.137E+18  | IsMasterProtein | A0A8C5BQI7  | Integrator complex subunit 11 OS=Gadus morhua OX=8049 PE=4 SV=1                                       | 12 | 2 | 2 | 2 | 394  | 44.8  | 7.55 | 5.88 | 2 | 1 |
| 3.481E+18  | IsMasterProtein | A0A8C5ADI8  | RNA methyltransferase OS=Gadus morhua OX=8049 GN=mepce PE=3 SV=1                                      | 4  | 2 | 2 | 2 | 838  | 91.4  | 8.46 | 5.86 | 2 | 1 |
| 8.209E+18  | IsMasterProtein | A0A8C4Z2D6  | Guanine nucleotide-binding protein subunit alpha-11 OS=Gadus morhua OX=8049 GN=LOC115555099 PE=3 SV=1 | 9  | 2 | 2 | 2 | 359  | 42    | 5.69 | 5.85 | 2 | 1 |
| 5.9073E+18 | IsMasterProtein | A0A8C4ZTC6  | LIM domain kinase 2 OS=Gadus morhua OX=8049 PE=3 SV=1                                                 | 6  | 2 | 2 | 2 | 684  | 76.3  | 7.25 | 5.84 | 2 | 1 |
| 3.944E+18  | IsMasterProtein | A0A8C5A4J9  | DENN/MADD domain containing 4C OS=Gadus morhua OX=8049 GN=dennd4c PE=4 SV=1                           | 3  | 2 | 2 | 2 | 1962 | 211.4 | 6.11 | 5.84 | 2 | 1 |
| 6.2165E+18 | IsMasterProtein | cRAP_P01112 | GTPase HRas OS=Homo sapiens GN=HRAS PE=1 SV=1                                                         | 14 | 2 | 2 | 2 | 189  | 21.3  | 5.31 | 5.84 | 2 | 1 |
| 1.284E+18  | IsMasterProtein | A0A8C5AGI8  | Myotubularin related protein 9 OS=Gadus morhua OX=8049 GN=mtmr9 PE=3 SV=1                             | 9  | 2 | 2 | 2 | 545  | 62    | 6.54 | 5.84 | 2 | 1 |
| 1.159E+18  | IsMasterProtein | A0A8C4ZPH9  | Desmoplakin b OS=Gadus morhua OX=8049 PE=4 SV=1                                                       | 1  | 2 | 2 | 2 | 2349 | 266.3 | 5.87 | 5.83 | 2 | 1 |
| 4.0724E+18 | IsMasterProtein | A0A8C5A3A2  | Lysine-specific demethylase 2B-like OS=Gadus morhua OX=8049 GN=LOC115542241 PE=3 SV=1                 | 6  | 2 | 2 | 2 | 1028 | 116   | 8.46 | 5.83 | 2 | 1 |
| 3.625E+18  | IsMasterProtein | A0A8C5BGL9  | Splicing factor U2AF subunit OS=Gadus morhua OX=8049 PE=3 SV=1                                        | 12 | 2 | 2 | 2 | 379  | 41.5  | 5.08 | 5.83 | 2 | 1 |
| 6.514E+18  | IsMasterProtein | A0A8C5AFM1  | LRRCT domain-containing protein OS=Gadus morhua OX=8049 PE=4 SV=1                                     | 7  | 2 | 2 | 2 | 762  | 84.4  | 8.41 | 5.82 | 2 | 1 |
| 3.9751E+18 | IsMasterProtein | A0A8C5C4Y7  | Calcium channel, voltage-dependent, gamma subunit 8b OS=Gadus morhua OX=8049 GN=cacng8b PE=3 SV=1     | 11 | 2 | 2 | 2 | 385  | 41.8  | 9.83 | 5.82 | 2 | 1 |
| 3.8245E+18 | IsMasterProtein | A0A8C5B7B7  | Nephronophthisis 3 OS=Gadus morhua OX=8049 GN=NPHP3 PE=4 SV=1                                         | 4  | 2 | 2 | 2 | 1254 | 141.3 | 6.38 | 5.82 | 2 | 1 |
| 8.015E+18  | IsMasterProtein | A0A8C5ANK8  | Glutathione reductase OS=Gadus morhua OX=8049 GN=gsr PE=3 SV=1                                        | 9  | 2 | 2 | 2 | 497  | 53.6  | 7.08 | 5.82 | 2 | 1 |
| 4.726E+18  | IsMasterProtein | A0A8C5CDQ3  | Alkaline phosphatase OS=Gadus morhua OX=8049 GN=alpl PE=3 SV=1                                        | 12 | 2 | 2 | 2 | 431  | 48.1  | 8.57 | 5.82 | 2 | 1 |
| 8.012E+18  | IsMasterProtein | A0A8C4ZCC2  | Usher syndrome 1Gb (autosomal recessive) OS=Gadus morhua OX=8049 PE=4 SV=1                            | 12 | 2 | 2 | 2 | 406  | 45    | 6.64 | 5.82 | 2 | 1 |

|                |                 |            |                                                                                                   |    |   |   |   |      |       |       |      |   |   |
|----------------|-----------------|------------|---------------------------------------------------------------------------------------------------|----|---|---|---|------|-------|-------|------|---|---|
| -<br>8.704E+17 | IsMasterProtein | A0A8C5ACQ3 | 60S ribosomal protein L35 OS=Gadus morhua OX=8049 GN=RPL35 PE=3 SV=1                              | 18 | 2 | 2 | 2 | 119  | 13.9  | 10.89 | 5.81 | 2 | 1 |
| -<br>1.333E+18 | IsMasterProtein | A0A8C5BLY0 | Huntingtin interacting protein 1 related b OS=Gadus morhua OX=8049 GN=hip1rb PE=3 SV=1            | 5  | 2 | 2 | 2 | 959  | 106.9 | 8.07  | 5.8  | 2 | 1 |
| -<br>2.485E+18 | IsMasterProtein | A0A8C5FX78 | GEM interacting protein OS=Gadus morhua OX=8049 PE=4 SV=1                                         | 4  | 2 | 2 | 2 | 1031 | 112.1 | 6.68  | 5.8  | 2 | 1 |
| -<br>2.427E+18 | IsMasterProtein | A0A8C5CKD3 | Phosphatase and actin regulator 4a OS=Gadus morhua OX=8049 GN=phactr4a PE=3 SV=1                  | 5  | 2 | 2 | 2 | 1091 | 125.5 | 9.01  | 5.8  | 2 | 1 |
| -<br>7.048E+18 | IsMasterProtein | A0A8C5FHS1 | Discs, large homolog 3 (Drosophila) OS=Gadus morhua OX=8049 PE=3 SV=1                             | 5  | 2 | 2 | 2 | 902  | 98    | 7.34  | 5.8  | 2 | 1 |
| -<br>9.017E+18 | IsMasterProtein | A0A8C4ZD91 | Unc-45 myosin chaperone B OS=Gadus morhua OX=8049 GN=unc45b PE=4 SV=1                             | 3  | 2 | 2 | 2 | 949  | 106   | 8.02  | 5.8  | 2 | 1 |
| -<br>4.12E+18  | IsMasterProtein | A0A8C5CV47 | Zinc finger E-box binding homeobox 2a OS=Gadus morhua OX=8049 GN=zeb2a PE=3 SV=1                  | 5  | 2 | 2 | 2 | 1244 | 136.7 | 6.64  | 5.8  | 2 | 1 |
| -<br>8.822E+18 | IsMasterProtein | A0A8C5CIH8 | Phosphodiesterase OS=Gadus morhua OX=8049 GN=pde4d PE=3 SV=1                                      | 5  | 2 | 2 | 2 | 819  | 91.8  | 4.96  | 5.79 | 2 | 1 |
| -<br>5.941E+18 | IsMasterProtein | A0A8C5AYJ1 | Uncharacterized protein OS=Gadus morhua OX=8049 PE=4 SV=1                                         | 10 | 2 | 3 | 2 | 686  | 74    | 5.86  | 5.79 | 2 | 1 |
| -<br>5.254E+18 | IsMasterProtein | A0A8C4ZT25 | 60S acidic ribosomal protein P2 OS=Gadus morhua OX=8049 PE=3 SV=1                                 | 19 | 2 | 2 | 2 | 113  | 11.5  | 4.41  | 5.78 | 2 | 1 |
| 4.569E+17      | IsMasterProtein | A0A8C4ZMR9 | Queuine tRNA-ribosyltransferase accessory subunit 2 OS=Gadus morhua OX=8049 GN=qtrt2 PE=3 SV=1    | 12 | 2 | 2 | 2 | 427  | 47.3  | 5.53  | 5.78 | 2 | 1 |
| 1.7691E+18     | IsMasterProtein | A0A8C5CVU1 | Synaptic vesicle glycoprotein 2Bb OS=Gadus morhua OX=8049 GN=sv2bb PE=3 SV=1                      | 7  | 2 | 2 | 2 | 687  | 76.8  | 5.62  | 5.78 | 2 | 1 |
| -<br>4.304E+18 | IsMasterProtein | A0A8C5FMH9 | Inosine-5'-monophosphate dehydrogenase OS=Gadus morhua OX=8049 GN=impdh2 PE=3 SV=1                | 10 | 2 | 2 | 2 | 613  | 67.2  | 8.79  | 5.78 | 2 | 1 |
| -<br>1.404E+18 | IsMasterProtein | A0A8C5C0K9 | Jacalin-type lectin domain-containing protein OS=Gadus morhua OX=8049 PE=3 SV=1                   | 8  | 2 | 2 | 2 | 328  | 35.3  | 5.36  | 5.77 | 2 | 1 |
| -<br>2.704E+18 | IsMasterProtein | A0A8C5FAA5 | Uncharacterized protein OS=Gadus morhua OX=8049 PE=4 SV=1                                         | 21 | 2 | 2 | 2 | 166  | 18.3  | 5.44  | 5.77 | 2 | 1 |
| -<br>9.181E+18 | IsMasterProtein | A0A8C4ZPN5 | Heterogeneous nuclear ribonucleoprotein A1-like OS=Gadus morhua OX=8049 GN=LOC115540741 PE=4 SV=1 | 16 | 2 | 2 | 2 | 390  | 39.5  | 7.52  | 5.77 | 2 | 1 |
| 2.1431E+18     | IsMasterProtein | A0A8C5CHV1 | Cyclin E1 OS=Gadus morhua OX=8049 GN=ccne1 PE=3 SV=1                                              | 12 | 2 | 2 | 2 | 438  | 49.9  | 6.04  | 5.77 | 2 | 1 |
| -<br>9.01E+18  | IsMasterProtein | A0A8C4YYK2 | Pentatricopeptide repeat domain 3 OS=Gadus morhua OX=8049 GN=PTCD3 PE=3 SV=1                      | 6  | 2 | 2 | 2 | 681  | 76.9  | 5.87  | 5.77 | 2 | 1 |
| 1.4696E+18     | IsMasterProtein | A0A8C5CEH9 | Uncharacterized protein OS=Gadus morhua OX=8049 PE=3 SV=1                                         | 12 | 2 | 2 | 2 | 450  | 50.2  | 6.6   | 5.77 | 2 | 1 |
| -<br>4.429E+18 | IsMasterProtein | A0A8C5CC93 | Fibrillin 1 OS=Gadus morhua OX=8049 GN=FBN1 PE=4 SV=1                                             | 1  | 2 | 2 | 2 | 2843 | 307   | 4.79  | 5.76 | 2 | 1 |
| -<br>1.671E+18 | IsMasterProtein | A0A8C5BHI6 | Zinc finger protein 883-like OS=Gadus morhua OX=8049 GN=LOC115547485 PE=4 SV=1                    | 6  | 2 | 2 | 2 | 881  | 100.4 | 8.72  | 5.76 | 2 | 1 |

|                |                 |            |                                                                                                                     |    |   |   |   |      |       |      |      |   |   |
|----------------|-----------------|------------|---------------------------------------------------------------------------------------------------------------------|----|---|---|---|------|-------|------|------|---|---|
| -<br>9.005E+18 | IsMasterProtein | A0A8C4ZSZ8 | KN motif and ankyrin repeat domain-containing protein 4-like OS=Gadus morhua OX=8049 GN=LOC115549013 PE=4 SV=1      | 4  | 2 | 2 | 2 | 951  | 103.5 | 5.66 | 5.76 | 2 | 1 |
| 1.5396E+18     | IsMasterProtein | A0A8C5C119 | Zinc finger and BTB domain containing 22b OS=Gadus morhua OX=8049 GN=ztb22b PE=4 SV=1                               | 9  | 2 | 2 | 2 | 668  | 69.9  | 5.83 | 5.76 | 2 | 1 |
| -<br>4.236E+18 | IsMasterProtein | A0A8C4ZYK6 | Cell migration inducing hyaluronidase 1 OS=Gadus morhua OX=8049 PE=4 SV=1                                           | 4  | 2 | 2 | 2 | 1234 | 137.8 | 7.36 | 5.76 | 2 | 1 |
| 7.4966E+18     | IsMasterProtein | A0A8C5FD25 | Kinesin family member 13A OS=Gadus morhua OX=8049 GN=kif13a PE=3 SV=1                                               | 2  | 2 | 2 | 2 | 1940 | 214.2 | 5.59 | 5.76 | 2 | 1 |
| 1.4988E+18     | IsMasterProtein | A0A8C5FRY9 | PR domain containing 11 OS=Gadus morhua OX=8049 PE=4 SV=1                                                           | 3  | 2 | 2 | 2 | 1032 | 116.2 | 6.62 | 5.76 | 2 | 1 |
| 2.4961E+17     | IsMasterProtein | A0A8C5BD05 | RAN binding protein 1 OS=Gadus morhua OX=8049 GN=ranbp1 PE=4 SV=1                                                   | 14 | 2 | 2 | 2 | 210  | 24.5  | 4.88 | 5.75 | 2 | 1 |
| 5.4544E+18     | IsMasterProtein | A0A8C4YZR8 | Inter-alpha-trypsin inhibitor heavy chain family member 6 OS=Gadus morhua OX=8049 GN=itih6 PE=3 SV=1                | 3  | 2 | 2 | 2 | 1265 | 137   | 9.23 | 5.75 | 2 | 1 |
| -<br>4.072E+18 | IsMasterProtein | A0A8C5FI93 | AF4/FMR2 family, member 4 OS=Gadus morhua OX=8049 GN=aff4 PE=3 SV=1                                                 | 5  | 2 | 2 | 2 | 1177 | 125.7 | 9.44 | 5.75 | 2 | 1 |
| -<br>8.897E+18 | IsMasterProtein | A0A8C4ZCU8 | Splicing factor U2AF 35 kDa subunit-like OS=Gadus morhua OX=8049 GN=LOC115542997 PE=4 SV=1                          | 12 | 2 | 2 | 2 | 212  | 24.6  | 6.23 | 5.75 | 2 | 1 |
| -<br>8.057E+18 | IsMasterProtein | A0A8C5C551 | Ral GTPase activating protein, alpha subunit 1 (catalytic) OS=Gadus morhua OX=8049 PE=4 SV=1                        | 2  | 2 | 2 | 2 | 2513 | 277.6 | 6.71 | 5.75 | 2 | 1 |
| -<br>2.015E+18 | IsMasterProtein | A0A8C5B512 | Uncharacterized protein OS=Gadus morhua OX=8049 PE=4 SV=1                                                           | 24 | 2 | 2 | 2 | 190  | 20.5  | 8.19 | 5.74 | 2 | 1 |
| -<br>4.799E+18 | IsMasterProtein | A0A8C4YWY0 | Nuclear receptor subfamily 0, group B, member 2a OS=Gadus morhua OX=8049 GN=nr0b2a PE=3 SV=1                        | 17 | 2 | 2 | 2 | 267  | 30.3  | 6.86 | 5.74 | 2 | 1 |
| -<br>6.004E+18 | IsMasterProtein | A0A8C5BXF5 | Ubiquitin carboxyl-terminal hydrolase OS=Gadus morhua OX=8049 GN=usp11 PE=3 SV=1                                    | 3  | 2 | 2 | 2 | 758  | 87.5  | 5.91 | 5.74 | 2 | 1 |
| -<br>2.597E+18 | IsMasterProtein | A0A8C5A339 | Calcium channel, voltage-dependent, L type, alpha 1C subunit OS=Gadus morhua OX=8049 PE=3 SV=1                      | 2  | 2 | 2 | 2 | 2042 | 226.9 | 7.33 | 5.74 | 2 | 1 |
| 8.2235E+18     | IsMasterProtein | A0A8C4ZP08 | ANF_receptor domain-containing protein OS=Gadus morhua OX=8049 PE=4 SV=1                                            | 10 | 2 | 2 | 2 | 472  | 52.2  | 7.4  | 5.73 | 2 | 1 |
| 8.3873E+18     | IsMasterProtein | A0A8C5A6Q4 | Beta-1,4-mannosyl-glycoprotein 4-beta-N-acetylglucosaminyltransferase b OS=Gadus morhua OX=8049 GN=mgat3b PE=4 SV=1 | 7  | 2 | 2 | 2 | 660  | 73.3  | 8.4  | 5.73 | 2 | 1 |
| -3E+18         | IsMasterProtein | A0A8C5FVA7 | PTPRF interacting protein alpha 2 OS=Gadus morhua OX=8049 PE=3 SV=1                                                 | 4  | 2 | 2 | 2 | 1156 | 130.2 | 6.44 | 5.72 | 2 | 1 |
| -<br>3.237E+18 | IsMasterProtein | A0A8C5AU64 | Cullin 2 OS=Gadus morhua OX=8049 GN=CUL2 PE=3 SV=1                                                                  | 7  | 2 | 2 | 2 | 752  | 87.6  | 7.39 | 5.72 | 2 | 1 |
| -<br>8.711E+18 | IsMasterProtein | A0A8C5BI76 | SRCR domain-containing protein OS=Gadus morhua OX=8049 PE=4 SV=1                                                    | 7  | 2 | 2 | 2 | 596  | 67.2  | 6.61 | 5.71 | 2 | 1 |
| -<br>9.067E+18 | IsMasterProtein | A0A8C5CD89 | Importin 4 OS=Gadus morhua OX=8049 PE=4 SV=1                                                                        | 4  | 2 | 2 | 2 | 1064 | 116.4 | 5.02 | 5.71 | 2 | 1 |
| 5.3418E+18     | IsMasterProtein | A0A8C5CBL2 | TBC1 domain family, member 32 OS=Gadus morhua OX=8049 PE=4 SV=1                                                     | 3  | 2 | 2 | 2 | 1218 | 136.5 | 7.05 | 5.71 | 2 | 1 |
| -<br>9.445E+17 | IsMasterProtein | A0A8C5B704 | Muscular LMNA-interacting protein OS=Gadus morhua OX=8049 GN=mlip PE=4 SV=1                                         | 8  | 2 | 2 | 2 | 606  | 64.2  | 9.16 | 5.71 | 2 | 1 |

|            |                 |            |                                                                                                        |    |   |   |   |      |       |      |      |   |   |
|------------|-----------------|------------|--------------------------------------------------------------------------------------------------------|----|---|---|---|------|-------|------|------|---|---|
| 6.3495E+18 | IsMasterProtein | A0A8C4ZAX1 | Kinesin family member 26Ab OS=Gadus morhua OX=8049 PE=3 SV=1                                           | 2  | 2 | 2 | 2 | 1974 | 210.6 | 8.81 | 5.71 | 2 | 1 |
| 5.719E+18  | IsMasterProtein | A0A8C5FN74 | Unconventional myosin-Ic-like OS=Gadus morhua OX=8049 GN=LOC115547358 PE=3 SV=1                        | 4  | 2 | 3 | 2 | 1024 | 116.5 | 8.38 | 5.7  | 2 | 1 |
| 7.61E+18   | IsMasterProtein | A0A8C5CFC4 | Transcription factor SOX OS=Gadus morhua OX=8049 PE=4 SV=1                                             | 5  | 2 | 2 | 2 | 420  | 45    | 7.5  | 5.7  | 2 | 1 |
| 1.706E+18  | IsMasterProtein | A0A8C5D633 | General transcription and DNA repair factor IIH helicase subunit XPB OS=Gadus morhua OX=8049 PE=3 SV=1 | 7  | 2 | 2 | 2 | 780  | 88.8  | 7.11 | 5.69 | 2 | 1 |
| 2.333E+18  | IsMasterProtein | A0A8C5CQR5 | Protein kinase C-binding protein 1-like OS=Gadus morhua OX=8049 GN=LOC115545806 PE=4 SV=1              | 4  | 2 | 2 | 2 | 1105 | 123   | 8.24 | 5.69 | 2 | 1 |
| 4.462E+18  | IsMasterProtein | A0A8C5FB61 | Toll-like receptor 9 OS=Gadus morhua OX=8049 GN=LOC115546259 PE=4 SV=1                                 | 41 | 2 | 2 | 2 | 114  | 13.3  | 9.58 | 5.69 | 2 | 1 |
| 5.1828E+18 | IsMasterProtein | A0A8C4ZQH0 | Antizyme inhibitor 1 OS=Gadus morhua OX=8049 GN=azin1 PE=3 SV=1                                        | 10 | 2 | 2 | 2 | 451  | 49.2  | 5.14 | 5.69 | 2 | 1 |
| 1.335E+18  | IsMasterProtein | A0A8C5C1A2 | Acyl-coenzyme A thioesterase 1-like OS=Gadus morhua OX=8049 GN=LOC115549063 PE=3 SV=1                  | 13 | 2 | 2 | 2 | 423  | 46.1  | 7.96 | 5.69 | 2 | 1 |
| 1.176E+18  | IsMasterProtein | A0A8C5CTZ9 | UDENN domain-containing protein OS=Gadus morhua OX=8049 PE=4 SV=1                                      | 6  | 2 | 2 | 2 | 833  | 93.1  | 9.1  | 5.69 | 2 | 1 |
| 2.6611E+17 | IsMasterProtein | A0A8C5FN12 | FAT atypical cadherin 4 OS=Gadus morhua OX=8049 GN=FAT4 PE=4 SV=1                                      | 1  | 2 | 2 | 2 | 4589 | 499.8 | 5.21 | 5.69 | 2 | 1 |
| 6.384E+18  | IsMasterProtein | A0A8C5BBP9 | Very low-density lipoprotein receptor OS=Gadus morhua OX=8049 GN=LOC115532609 PE=4 SV=1                | 6  | 2 | 2 | 2 | 873  | 95.5  | 5.07 | 5.68 | 2 | 1 |
| 2.481E+18  | IsMasterProtein | A0A8C5CY50 | Dynein cytoplasmic 1 intermediate chain 2 OS=Gadus morhua OX=8049 GN=DYNC1I2 PE=3 SV=1                 | 6  | 2 | 2 | 2 | 613  | 68.4  | 5.22 | 5.68 | 2 | 1 |
| 6.952E+18  | IsMasterProtein | A0A8C5CMB1 | P-type Cu(+) transporter OS=Gadus morhua OX=8049 GN=LOC115541566 PE=3 SV=1                             | 4  | 2 | 2 | 2 | 1334 | 141.4 | 6.99 | 5.68 | 2 | 1 |
| 8.169E+18  | IsMasterProtein | A0A8C5B113 | Retinol dehydrogenase 12-like OS=Gadus morhua OX=8049 GN=LOC115537065 PE=3 SV=1                        | 15 | 2 | 2 | 2 | 300  | 33.1  | 7.72 | 5.68 | 2 | 1 |
| 1.9163E+18 | IsMasterProtein | A0A8C5AM40 | Transmembrane protein 169b OS=Gadus morhua OX=8049 GN=tmem169b PE=4 SV=1                               | 13 | 2 | 2 | 2 | 303  | 33.4  | 5.44 | 5.68 | 2 | 1 |
| 8.123E+18  | IsMasterProtein | A0A8C5AHD0 | DNA-directed RNA polymerase subunit OS=Gadus morhua OX=8049 GN=polr1a PE=3 SV=1                        | 3  | 2 | 2 | 2 | 1623 | 182.6 | 7.91 | 5.68 | 2 | 1 |
| 5.474E+18  | IsMasterProtein | A0A8C5C218 | Family with sequence similarity 49 member Ba OS=Gadus morhua OX=8049 GN=fam49ba PE=3 SV=1              | 7  | 2 | 2 | 2 | 359  | 40.7  | 6.33 | 5.67 | 2 | 1 |
| 9.112E+18  | IsMasterProtein | A0A8C5BPF9 | Arrestin domain containing 1b OS=Gadus morhua OX=8049 GN=arrdc1b PE=3 SV=1                             | 6  | 2 | 2 | 2 | 430  | 46.1  | 7.18 | 5.67 | 2 | 1 |
| 5.5443E+18 | IsMasterProtein | A0A8C4ZI74 | Peptidylprolyl isomerase OS=Gadus morhua OX=8049 GN=fkbp3 PE=4 SV=1                                    | 11 | 2 | 2 | 2 | 222  | 25    | 7.96 | 5.67 | 2 | 1 |
| 5.3041E+18 | IsMasterProtein | A0A8C5BL54 | A kinase (PRKA) anchor protein 11 OS=Gadus morhua OX=8049 GN=akap11 PE=4 SV=1                          | 2  | 2 | 2 | 2 | 1843 | 199.6 | 5.44 | 5.67 | 2 | 1 |
| 5.03E+18   | IsMasterProtein | A0A8C5A2U2 | Tetratricopeptide repeat domain 13 OS=Gadus morhua OX=8049 PE=4 SV=1                                   | 5  | 2 | 2 | 2 | 800  | 91    | 8.15 | 5.67 | 2 | 1 |



|                    |                     |                |                                                                                               |    |   |   |   |      |           |      |      |   |   |
|--------------------|---------------------|----------------|-----------------------------------------------------------------------------------------------|----|---|---|---|------|-----------|------|------|---|---|
| -<br>1.265E+1<br>8 | IsMasterProt<br>ein | A0A8C5BDC<br>1 | Uncharacterized protein OS=Gadus morhua OX=8049 PE=4 SV=1                                     | 5  | 2 | 2 | 2 | 609  | 70.4      | 8.32 | 5.67 | 2 | 1 |
| -<br>8.93E+18      | IsMasterProt<br>ein | A0A8C5F5C<br>8 | Maternal embryonic leucine zipper kinase OS=Gadus morhua OX=8049 GN=melk PE=3 SV=1            | 5  | 2 | 2 | 2 | 690  | 77.9      | 8.94 | 5.67 | 2 | 1 |
| -<br>6.163E+1<br>8 | IsMasterProt<br>ein | A0A8C5AM7<br>8 | Protein Wnt OS=Gadus morhua OX=8049 GN=LOC115545792 PE=3 SV=1                                 | 14 | 2 | 2 | 2 | 350  | 39.3      | 9.16 | 5.66 | 2 | 1 |
| -<br>1.988E+1<br>8 | IsMasterProt<br>ein | A0A8C5A39<br>3 | Solute carrier family 17 member 7a OS=Gadus morhua OX=8049 PE=4 SV=1                          | 8  | 2 | 2 | 2 | 590  | 65.5      | 7.85 | 5.66 | 2 | 1 |
| 5.1897E+<br>16     | IsMasterProt<br>ein | A0A8C5BIS1     | HIT domain-containing protein OS=Gadus morhua OX=8049 PE=3 SV=1                               | 18 | 2 | 2 | 2 | 252  | 27.5      | 8.4  | 5.65 | 2 | 1 |
| -<br>6.698E+1<br>8 | IsMasterProt<br>ein | A0A8C4ZFF<br>1 | 60S ribosomal protein L11 OS=Gadus morhua OX=8049 GN=rpl11 PE=3 SV=1                          | 14 | 2 | 2 | 2 | 177  | 20.3      | 9.94 | 5.65 | 2 | 1 |
| -<br>1.403E+1<br>8 | IsMasterProt<br>ein | A0A8C5A8Z<br>7 | RNA binding motif protein 39 OS=Gadus morhua OX=8049 GN=RBM39 PE=4 SV=1                       | 6  | 2 | 2 | 2 | 459  | 50.9      | 9.6  | 5.65 | 2 | 1 |
| -<br>8.711E+1<br>8 | IsMasterProt<br>ein | A0A8C5A0C<br>3 | DENN/MADD domain containing 5B OS=Gadus morhua OX=8049 GN=dennd5b PE=3 SV=1                   | 4  | 2 | 2 | 2 | 1299 | 145.<br>1 | 6.68 | 5.65 | 2 | 1 |
| -<br>8.436E+1<br>7 | IsMasterProt<br>ein | A0A8C5AD1<br>9 | Crystallin beta-gamma domain containing 2 OS=Gadus morhua OX=8049 GN=crybg2 PE=3 SV=1         | 2  | 2 | 2 | 2 | 2689 | 287.<br>6 | 4.97 | 5.64 | 2 | 1 |
| 7.0293E+<br>18     | IsMasterProt<br>ein | A0A8C5C4W<br>5 | ATPase 13A1 OS=Gadus morhua OX=8049 GN=atp13a1 PE=3 SV=1                                      | 4  | 2 | 2 | 2 | 1202 | 133.<br>7 | 7.33 | 5.64 | 2 | 1 |
| 5.3014E+<br>18     | IsMasterProt<br>ein | A0A8C4Z1X<br>2 | Midkine a OS=Gadus morhua OX=8049 GN=mdka PE=3 SV=1                                           | 22 | 2 | 2 | 2 | 146  | 16        | 9.55 | 5.64 | 2 | 1 |
| -<br>3.721E+1<br>8 | IsMasterProt<br>ein | A0A8C4ZVX<br>2 | BAF nuclear assembly factor 1 OS=Gadus morhua OX=8049 GN=banf1 PE=4 SV=1                      | 14 | 2 | 2 | 2 | 90   | 10.1      | 6.09 | 5.62 | 2 | 1 |
| -<br>8.516E+1<br>8 | IsMasterProt<br>ein | A0A8C5AS8<br>8 | Ubiquitin carboxyl-terminal hydrolase OS=Gadus morhua OX=8049 GN=USP37 PE=3 SV=1              | 5  | 2 | 2 | 2 | 879  | 97.5      | 6.87 | 5.62 | 2 | 1 |
| -<br>2.532E+1<br>8 | IsMasterProt<br>ein | A0A8C5FI51     | Peptidase M12B domain-containing protein OS=Gadus morhua OX=8049 PE=4 SV=1                    | 7  | 2 | 2 | 2 | 943  | 102.<br>4 | 8.51 | 5.62 | 2 | 1 |
| -<br>4.855E+1<br>8 | IsMasterProt<br>ein | A0A8C5F9V<br>4 | Uncharacterized protein OS=Gadus morhua OX=8049 PE=3 SV=1                                     | 1  | 2 | 2 | 2 | 3060 | 348.<br>6 | 5.99 | 5.62 | 2 | 1 |
| -<br>8.934E+1<br>8 | IsMasterProt<br>ein | A0A8C4ZCG<br>4 | ELKS/RAB6-interacting/CAST family member 2 OS=Gadus morhua OX=8049 PE=4 SV=1                  | 3  | 2 | 2 | 2 | 1026 | 116.<br>2 | 6.81 | 5.62 | 2 | 1 |
| -<br>7.656E+1<br>8 | IsMasterProt<br>ein | A0A8C4YYR<br>0 | AT rich interactive domain 3A (BRIGHT-like) OS=Gadus morhua OX=8049 PE=4 SV=1                 | 8  | 2 | 2 | 2 | 541  | 59.7      | 5.1  | 5.61 | 2 | 1 |
| -<br>6.954E+1<br>7 | IsMasterProt<br>ein | A0A8C5F5X<br>5 | Dopamine receptor D4b OS=Gadus morhua OX=8049 GN=drd4b PE=3 SV=1                              | 12 | 2 | 2 | 2 | 417  | 46.5      | 8.82 | 5.61 | 2 | 1 |
| -<br>1.898E+1<br>8 | IsMasterProt<br>ein | A0A8C5D0Q<br>0 | Proopiomelanocortin a OS=Gadus morhua OX=8049 GN=pomca PE=3 SV=1                              | 20 | 2 | 2 | 2 | 213  | 23.6      | 8.34 | 5.61 | 2 | 1 |
| -<br>1.052E+1<br>8 | IsMasterProt<br>ein | A0A8C5AFV<br>4 | Extracellular calcium-sensing receptor-like OS=Gadus morhua OX=8049 GN=LOC115560862 PE=4 SV=1 | 5  | 2 | 3 | 2 | 858  | 95.6      | 7.71 | 5.61 | 2 | 1 |

|            |                 |            |                                                                                                    |    |   |   |   |      |       |      |      |   |   |
|------------|-----------------|------------|----------------------------------------------------------------------------------------------------|----|---|---|---|------|-------|------|------|---|---|
| 3.8711E+18 | IsMasterProtein | A0A8C5F596 | Proteasome subunit beta OS=Gadus morhua OX=8049 GN=psmb9a PE=3 SV=1                                | 10 | 2 | 2 | 2 | 216  | 23    | 4.61 | 5.6  | 2 | 1 |
| -          | IsMasterProtein | A0A8C5FXI4 | Inositol polyphosphate-5-phosphatase F OS=Gadus morhua OX=8049 GN=inpp5f PE=4 SV=1                 | 3  | 2 | 2 | 2 | 1075 | 120.2 | 6.24 | 5.6  | 2 | 1 |
| 5.12E+18   | IsMasterProtein | A0A8C5CVR1 | F-box protein 10 OS=Gadus morhua OX=8049 GN=FBXO10 PE=4 SV=1                                       | 6  | 2 | 2 | 2 | 974  | 105   | 6.68 | 5.6  | 2 | 1 |
| -          | IsMasterProtein | A0A8C5FNG3 | EF-hand and coiled-coil domain containing 1 OS=Gadus morhua OX=8049 GN=EFCC1 PE=4 SV=1             | 9  | 2 | 2 | 2 | 548  | 60.7  | 5.49 | 5.6  | 2 | 1 |
| 2.721E+18  | IsMasterProtein | A0A8C5CHA2 | RING-type E3 ubiquitin transferase OS=Gadus morhua OX=8049 GN=mid2 PE=4 SV=1                       | 6  | 2 | 2 | 2 | 725  | 81.5  | 7.75 | 5.6  | 2 | 1 |
| 3.6404E+18 | IsMasterProtein | A0A8C4ZAT7 | Uncharacterized protein OS=Gadus morhua OX=8049 PE=3 SV=1                                          | 5  | 2 | 2 | 2 | 831  | 94.4  | 8.69 | 5.6  | 2 | 1 |
| 8.746E+18  | IsMasterProtein | A0A8C5A2R3 | G protein-coupled receptor kinase interacting ArfGAP 2a OS=Gadus morhua OX=8049 GN=gat2a PE=4 SV=1 | 8  | 2 | 2 | 2 | 720  | 79    | 7.81 | 5.6  | 2 | 1 |
| -          | IsMasterProtein | A0A8C5F8Q2 | Diacylglycerol kinase OS=Gadus morhua OX=8049 GN=DGKD PE=3 SV=1                                    | 4  | 2 | 2 | 2 | 1150 | 127.9 | 7.9  | 5.59 | 2 | 1 |
| 7.342E+16  | IsMasterProtein | A0A8C4ZSB8 | Forkhead box D3 OS=Gadus morhua OX=8049 PE=4 SV=1                                                  | 14 | 2 | 2 | 2 | 363  | 39.2  | 7.06 | 5.59 | 2 | 1 |
| -          | IsMasterProtein | A0A8C4ZDA5 | Bassoon (presynaptic cytomatrix protein) b OS=Gadus morhua OX=8049 PE=4 SV=1                       | 1  | 2 | 2 | 2 | 3241 | 353   | 7.15 | 5.59 | 2 | 1 |
| 2.2038E+18 | IsMasterProtein | A0A8C5BK91 | Uncharacterized protein OS=Gadus morhua OX=8049 PE=4 SV=1                                          | 6  | 2 | 2 | 2 | 670  | 77.4  | 9.19 | 5.58 | 2 | 1 |
| -          | IsMasterProtein | A0A8C5ATJ1 | Protoporphyrinogen oxidase OS=Gadus morhua OX=8049 GN=ppox PE=3 SV=1                               | 9  | 2 | 2 | 2 | 426  | 45.4  | 9.2  | 5.58 | 2 | 1 |
| 4.154E+18  | IsMasterProtein | A0A8C4ZPI6 | DNA helicase OS=Gadus morhua OX=8049 GN=blm PE=3 SV=1                                              | 3  | 2 | 2 | 2 | 1371 | 152.1 | 8.51 | 5.57 | 2 | 1 |
| 3.6753E+18 | IsMasterProtein | A0A8C5CCN2 | Inactive dipeptidyl peptidase 10-like OS=Gadus morhua OX=8049 GN=LOC115529717 PE=4 SV=1            | 5  | 2 | 2 | 2 | 634  | 71.8  | 7.33 | 5.57 | 2 | 1 |
| 3.5691E+18 | IsMasterProtein | A0A8C5C3R4 | Squalene monooxygenase OS=Gadus morhua OX=8049 GN=sqlea PE=3 SV=1                                  | 7  | 2 | 2 | 2 | 525  | 58.4  | 8.24 | 5.57 | 2 | 1 |
| -          | IsMasterProtein | A0A8C5C6V3 | Uncharacterized protein OS=Gadus morhua OX=8049 PE=4 SV=1                                          | 12 | 2 | 2 | 2 | 409  | 43.7  | 8.21 | 5.57 | 2 | 1 |
| 2.3823E+18 | IsMasterProtein | A0A8C5FP15 | Cache domain containing 1 OS=Gadus morhua OX=8049 GN=cachd1 PE=3 SV=1                              | 4  | 2 | 2 | 2 | 1254 | 140.2 | 6.92 | 5.57 | 2 | 1 |
| 8.0113E+18 | IsMasterProtein | A0A8C5F9I5 | Uncharacterized protein OS=Gadus morhua OX=8049 PE=3 SV=1                                          | 11 | 2 | 2 | 2 | 287  | 31.8  | 6.61 | 5.57 | 2 | 1 |
| -          | IsMasterProtein | A0A8C4Z4G4 | Complement factor properdin OS=Gadus morhua OX=8049 GN=cfp PE=4 SV=1                               | 5  | 2 | 2 | 2 | 574  | 62.3  | 6.24 | 5.57 | 2 | 1 |
| 5.395E+17  | IsMasterProtein | A0A8C4ZZU2 | Fibronectin OS=Gadus morhua OX=8049 GN=fn1a PE=4 SV=1                                              | 2  | 2 | 2 | 2 | 2399 | 262.4 | 5.43 | 5.56 | 2 | 1 |
| -          | IsMasterProtein | A0A8C5A5I9 | Thymopoietin a OS=Gadus morhua OX=8049 GN=tmpoa PE=3 SV=1                                          | 8  | 2 | 2 | 2 | 637  | 69.1  | 8.75 | 5.56 | 2 | 1 |
| 6.019E+18  | IsMasterProtein | A0A8C4ZYL0 | NCK-associated protein 5-like OS=Gadus morhua OX=8049 GN=nckap5l PE=4 SV=1                         | 3  | 2 | 2 | 2 | 1537 | 162   | 6.54 | 5.56 | 2 | 1 |
| 8.249E+18  | IsMasterProtein | A0A8C5F590 | Hydroxysteroid (17-beta) dehydrogenase 2 OS=Gadus morhua OX=8049 GN=hsd17b2 PE=3 SV=1              | 14 | 2 | 2 | 2 | 378  | 41    | 7.8  | 5.56 | 2 | 1 |
| 9.185E+18  |                 |            |                                                                                                    |    |   |   |   |      |       |      |      |   |   |
| 1.08E+18   |                 |            |                                                                                                    |    |   |   |   |      |       |      |      |   |   |
| 1.922E+18  |                 |            |                                                                                                    |    |   |   |   |      |       |      |      |   |   |

|            |                 |            |                                                                                                                |    |   |   |   |      |       |      |      |   |   |
|------------|-----------------|------------|----------------------------------------------------------------------------------------------------------------|----|---|---|---|------|-------|------|------|---|---|
| 1.9257E+18 | IsMasterProtein | A0A8C4ZFX6 | 1-phosphatidylinositol 4,5-bisphosphate phosphodiesterase OS=Gadus morhua OX=8049 GN=PLCB2 PE=4 SV=1           | 5  | 2 | 2 | 2 | 1148 | 128.8 | 5.36 | 5.56 | 2 | 1 |
| 2.058E+18  | IsMasterProtein | A0A8C5FEM7 | Adaptor related protein complex 1 subunit sigma 3a OS=Gadus morhua OX=8049 GN=wdfy1 PE=4 SV=1                  | 11 | 2 | 2 | 2 | 410  | 46.6  | 7.09 | 5.56 | 2 | 1 |
| 7.487E+18  | IsMasterProtein | A0A8C5CZU5 | Uncharacterized protein OS=Gadus morhua OX=8049 PE=4 SV=1                                                      | 3  | 2 | 2 | 2 | 1622 | 183.9 | 5.94 | 5.55 | 2 | 1 |
| 5.362E+18  | IsMasterProtein | A0A8C5F8V1 | Complement subcomponent C1r OS=Gadus morhua OX=8049 PE=4 SV=1                                                  | 4  | 2 | 2 | 2 | 691  | 75.9  | 5.41 | 5.55 | 2 | 1 |
| 8.8598E+18 | IsMasterProtein | A0A8C5F3I2 | Phosphoinositide phospholipase C OS=Gadus morhua OX=8049 GN=LOC115531145 PE=4 SV=1                             | 6  | 2 | 2 | 2 | 788  | 88.9  | 6.99 | 5.55 | 2 | 1 |
| 5.324E+18  | IsMasterProtein | A0A8C5F5Y7 | Tankyrase, TRF1-interacting ankyrin-related ADP-ribose polymerase b OS=Gadus morhua OX=8049 GN=tnksb PE=3 SV=1 | 5  | 2 | 2 | 2 | 1025 | 113.8 | 9.17 | 5.54 | 2 | 1 |
| 7.947E+18  | IsMasterProtein | A0A8C4ZP32 | Envoplakin a OS=Gadus morhua OX=8049 PE=4 SV=1                                                                 | 2  | 2 | 2 | 2 | 1689 | 194   | 5.82 | 5.54 | 2 | 1 |
| 1.369E+18  | IsMasterProtein | A0A8C5ADE3 | Dynein regulatory complex protein 10 OS=Gadus morhua OX=8049 PE=3 SV=1                                         | 8  | 2 | 2 | 2 | 390  | 41.6  | 8.56 | 5.54 | 2 | 1 |
| 8.137E+18  | IsMasterProtein | A0A8C5BY24 | Disintegrin and metalloproteinase domain-containing protein 10 OS=Gadus morhua OX=8049 PE=4 SV=1               | 4  | 2 | 2 | 2 | 793  | 89    | 7.93 | 5.54 | 2 | 1 |
| 9.143E+18  | IsMasterProtein | A0A8C5AUY2 | Teneurin-3-like OS=Gadus morhua OX=8049 GN=TENM3 PE=3 SV=1                                                     | 2  | 2 | 2 | 2 | 2784 | 306.7 | 7.01 | 5.53 | 2 | 1 |
| 3.8876E+18 | IsMasterProtein | A0A8C4Z2M1 | Low-density lipoprotein receptor-related protein 1-like OS=Gadus morhua OX=8049 GN=LOC115543056 PE=3 SV=1      | 1  | 2 | 2 | 2 | 4547 | 507.7 | 5.22 | 5.53 | 2 | 1 |
| 8.042E+18  | IsMasterProtein | A0A8C5C7D0 | Extended synaptotagmin-like protein 2a OS=Gadus morhua OX=8049 PE=4 SV=1                                       | 6  | 2 | 2 | 2 | 816  | 89.9  | 8.44 | 5.52 | 2 | 1 |
| 6.948E+18  | IsMasterProtein | A0A8C4ZH52 | Solute carrier family 35 member F5 OS=Gadus morhua OX=8049 GN=slc35f5 PE=4 SV=1                                | 5  | 2 | 2 | 2 | 454  | 51.3  | 9.29 | 5.52 | 2 | 1 |
| 3.157E+18  | IsMasterProtein | A0A8C5BBG9 | Structure-specific endonuclease subunit SLX4 OS=Gadus morhua OX=8049 PE=3 SV=1                                 | 3  | 2 | 2 | 2 | 1558 | 164   | 5.83 | 5.52 | 2 | 1 |
| 3.7335E+17 | IsMasterProtein | A0A8C5F5W6 | Delta-1-pyrroline-5-carboxylate synthase OS=Gadus morhua OX=8049 GN=LOC115560515 PE=3 SV=1                     | 5  | 2 | 2 | 2 | 782  | 85.4  | 7.05 | 5.52 | 2 | 1 |
| 1.6258E+18 | IsMasterProtein | A0A8C5FIS1 | DUF4585 domain-containing protein OS=Gadus morhua OX=8049 GN=LOC115540703 PE=4 SV=1                            | 3  | 2 | 2 | 2 | 1456 | 157.8 | 6.57 | 5.52 | 2 | 1 |
| 2.426E+18  | IsMasterProtein | A0A8C4Z8S9 | Alanine--tRNA ligase OS=Gadus morhua OX=8049 GN=AARS PE=3 SV=1                                                 | 5  | 2 | 2 | 2 | 1003 | 111.3 | 5.57 | 5.51 | 2 | 1 |
| 8.931E+17  | IsMasterProtein | A0A8C5C0C6 | Histone acetyltransferase OS=Gadus morhua OX=8049 GN=kat6a PE=3 SV=1                                           | 2  | 2 | 2 | 2 | 2311 | 254.3 | 6.33 | 5.51 | 2 | 1 |
| 7.002E+18  | IsMasterProtein | A0A8C5FVF6 | UDP-N-acetylglucosamine 4-epimerase OS=Gadus morhua OX=8049 GN=gale PE=4 SV=1                                  | 5  | 2 | 2 | 2 | 537  | 57.6  | 7.44 | 5.51 | 2 | 1 |
| 3.93E+18   | IsMasterProtein | A0A8C4ZWU9 | M-phase inducer phosphatase OS=Gadus morhua OX=8049 GN=cdc25b PE=3 SV=1                                        | 6  | 2 | 2 | 2 | 593  | 65.6  | 6.76 | 5.5  | 2 | 1 |
| 2.305E+16  | IsMasterProtein | A0A8C5APK7 | Mesoderm posterior ba OS=Gadus morhua OX=8049 PE=4 SV=1                                                        | 12 | 2 | 2 | 2 | 252  | 26.5  | 9.2  | 5.5  | 2 | 1 |

|                |                 |            |                                                                                                      |    |   |   |   |      |       |       |      |   |   |
|----------------|-----------------|------------|------------------------------------------------------------------------------------------------------|----|---|---|---|------|-------|-------|------|---|---|
| 6.9626E+17     | IsMasterProtein | A0A8C4ZIP4 | Chondroadherin OS=Gadus morhua OX=8049 GN=chad PE=4 SV=1                                             | 8  | 2 | 2 | 2 | 370  | 41    | 9.23  | 5.5  | 2 | 1 |
| -<br>1.024E+18 | IsMasterProtein | A0A8C4Z234 | Uncharacterized protein OS=Gadus morhua OX=8049 PE=4 SV=1                                            | 5  | 2 | 2 | 2 | 650  | 71.4  | 7.05  | 5.5  | 2 | 1 |
| -<br>8.667E+18 | IsMasterProtein | A0A8C5AQE8 | Golgin subfamily A member 5 OS=Gadus morhua OX=8049 GN=golga5 PE=4 SV=1                              | 6  | 2 | 2 | 2 | 741  | 82.3  | 5.47  | 5.5  | 2 | 1 |
| -<br>1.852E+18 | IsMasterProtein | A0A8C4ZQN2 | FTP domain-containing protein OS=Gadus morhua OX=8049 PE=4 SV=1                                      | 22 | 2 | 2 | 2 | 184  | 20.7  | 5.54  | 5.49 | 2 | 1 |
| 4.5334E+18     | IsMasterProtein | A0A8C4Z0V3 | Polyadenylate-binding protein OS=Gadus morhua OX=8049 PE=3 SV=1                                      | 7  | 2 | 2 | 2 | 618  | 69.2  | 9.44  | 5.49 | 2 | 1 |
| -<br>1.901E+16 | IsMasterProtein | A0A8C5F3D8 | Uncharacterized protein OS=Gadus morhua OX=8049 PE=4 SV=1                                            | 3  | 2 | 2 | 2 | 519  | 55.6  | 7.96  | 5.49 | 2 | 1 |
| 3.016E+18      | IsMasterProtein | A0A8C5C3L1 | Importin-13 OS=Gadus morhua OX=8049 GN=LOC115548240 PE=3 SV=1                                        | 5  | 2 | 2 | 2 | 973  | 107.5 | 5.43  | 5.49 | 2 | 1 |
| 5.7373E+18     | IsMasterProtein | A0A8C4ZNG8 | ELAV-like protein OS=Gadus morhua OX=8049 GN=elav1a PE=3 SV=1                                        | 15 | 2 | 2 | 2 | 364  | 40.1  | 9.29  | 5.49 | 2 | 1 |
| -<br>8.588E+17 | IsMasterProtein | A0A8C4ZP27 | N-myc downstream regulated 1a OS=Gadus morhua OX=8049 PE=3 SV=1                                      | 6  | 2 | 2 | 2 | 403  | 44.8  | 7.37  | 5.49 | 2 | 1 |
| 7.3546E+18     | IsMasterProtein | A0A8C4Z468 | Protein kinase, membrane associated tyrosine/threonine 1 OS=Gadus morhua OX=8049 GN=pkmyt1 PE=4 SV=1 | 10 | 2 | 3 | 2 | 573  | 64    | 8.59  | 5.49 | 2 | 1 |
| -<br>7.049E+18 | IsMasterProtein | A0A8C4ZNN0 | Ribosomal L23eN domain-containing protein OS=Gadus morhua OX=8049 PE=3 SV=1                          | 14 | 2 | 2 | 2 | 158  | 17.9  | 10.45 | 5.48 | 2 | 1 |
| -<br>4.888E+18 | IsMasterProtein | A0A8C5CT48 | Golgi brefeldin A resistant guanine nucleotide exchange factor 1 OS=Gadus morhua OX=8049 PE=4 SV=1   | 4  | 2 | 2 | 2 | 776  | 85.5  | 5.49  | 5.48 | 2 | 1 |
| 5.3677E+18     | IsMasterProtein | A0A8C5A496 | Uncharacterized protein OS=Gadus morhua OX=8049 PE=4 SV=1                                            | 7  | 2 | 2 | 2 | 352  | 39.8  | 8.22  | 5.48 | 2 | 1 |
| 7.3158E+18     | IsMasterProtein | A0A8C5CSD7 | AIG1-type G domain-containing protein OS=Gadus morhua OX=8049 PE=3 SV=1                              | 9  | 2 | 2 | 2 | 599  | 65.1  | 4.93  | 5.48 | 2 | 1 |
| 7.669E+18      | IsMasterProtein | A0A8C5ABM9 | Whirlin b OS=Gadus morhua OX=8049 GN=whrn b PE=4 SV=1                                                | 3  | 2 | 2 | 2 | 1102 | 116.7 | 7.33  | 5.48 | 2 | 1 |
| -<br>4.555E+18 | IsMasterProtein | A0A8C4Z9A1 | Protein-serine/threonine phosphatase OS=Gadus morhua OX=8049 PE=3 SV=1                               | 10 | 2 | 2 | 2 | 417  | 47.7  | 5.92  | 5.48 | 2 | 1 |
| -<br>7.017E+18 | IsMasterProtein | A0A8C5BV16 | ZP domain-containing protein OS=Gadus morhua OX=8049 PE=4 SV=1                                       | 6  | 2 | 2 | 2 | 721  | 79.6  | 6.55  | 5.48 | 2 | 1 |
| -<br>7.843E+18 | IsMasterProtein | A0A8C5FUF1 | Uncharacterized protein OS=Gadus morhua OX=8049 PE=3 SV=1                                            | 5  | 2 | 2 | 2 | 977  | 108.6 | 7.24  | 5.47 | 2 | 1 |
| -<br>4.521E+18 | IsMasterProtein | A0A8C5A8G0 | SAM and SH3 domain-containing protein 1-like OS=Gadus morhua OX=8049 GN=LOC115543522 PE=4 SV=1       | 4  | 2 | 2 | 2 | 1102 | 119.5 | 7.27  | 5.47 | 2 | 1 |
| 2.0751E+18     | IsMasterProtein | A0A8C5AJR0 | Phosphoinositide phospholipase C OS=Gadus morhua OX=8049 PE=4 SV=1                                   | 3  | 2 | 2 | 2 | 1503 | 167   | 7.68  | 5.47 | 2 | 1 |
| -<br>7.06E+18  | IsMasterProtein | A0A8C5FS74 | E3 ubiquitin-protein ligase NRDP1 OS=Gadus morhua OX=8049 GN=nmf41 PE=4 SV=1                         | 13 | 2 | 2 | 2 | 327  | 37    | 7.62  | 5.47 | 2 | 1 |
| -<br>7.777E+16 | IsMasterProtein | A0A8C5F3J8 | RNA helicase OS=Gadus morhua OX=8049 GN=ddx59 PE=3 SV=1                                              | 5  | 2 | 2 | 2 | 661  | 72.6  | 7.65  | 5.47 | 2 | 1 |

|                |                 |            |                                                                                                             |    |   |   |   |      |       |       |      |   |   |
|----------------|-----------------|------------|-------------------------------------------------------------------------------------------------------------|----|---|---|---|------|-------|-------|------|---|---|
| 8.9876E+18     | IsMasterProtein | A0A8C5CR57 | Centrosomal protein 85, like OS=Gadus morhua OX=8049 PE=4 SV=1                                              | 4  | 2 | 2 | 2 | 789  | 86.8  | 7.74  | 5.46 | 2 | 1 |
| 6.8838E+18     | IsMasterProtein | A0A8C5FBC8 | Uncharacterized protein OS=Gadus morhua OX=8049 PE=3 SV=1                                                   | 7  | 2 | 2 | 2 | 500  | 54.7  | 7.68  | 5.46 | 2 | 1 |
| -<br>8.672E+18 | IsMasterProtein | A0A8C5BLZ8 | Mitochondrial basic amino acids transporter-like OS=Gadus morhua OX=8049 GN=LOC115534766 PE=3 SV=1          | 13 | 2 | 2 | 2 | 312  | 34    | 9.14  | 5.46 | 2 | 1 |
| 8.1978E+18     | IsMasterProtein | A0A8C4YV93 | Uncharacterized protein OS=Gadus morhua OX=8049 PE=3 SV=1                                                   | 12 | 2 | 2 | 2 | 382  | 43.1  | 6.35  | 5.46 | 2 | 1 |
| -<br>9.902E+17 | IsMasterProtein | A0A8C4ZJ72 | Arginine/serine-rich coiled-coil 2 OS=Gadus morhua OX=8049 GN=rsr2 PE=4 SV=1                                | 11 | 2 | 2 | 2 | 409  | 47.4  | 11.15 | 5.46 | 2 | 1 |
| 1.6598E+18     | IsMasterProtein | A0A8C5AKM5 | Chromobox protein homolog 2-like OS=Gadus morhua OX=8049 GN=LOC115531460 PE=4 SV=1                          | 8  | 2 | 2 | 2 | 643  | 66.3  | 10.32 | 5.46 | 2 | 1 |
| -<br>1.544E+18 | IsMasterProtein | A0A8C5BIR7 | CDK5 regulatory subunit associated protein 1 OS=Gadus morhua OX=8049 GN=cdk5rap1 PE=3 SV=1                  | 5  | 2 | 2 | 2 | 619  | 69.4  | 8.31  | 5.45 | 2 | 1 |
| 5.0323E+18     | IsMasterProtein | A0A8C5CM7  | Ankyrin repeat domain-containing protein 2-like OS=Gadus morhua OX=8049 GN=LOC115559580 PE=4 SV=1           | 10 | 2 | 2 | 2 | 293  | 32.1  | 8.09  | 5.45 | 2 | 1 |
| -<br>8.213E+18 | IsMasterProtein | A0A8C5B7E8 | Formin homology 2 domain containing 3a OS=Gadus morhua OX=8049 GN=fhod3a PE=4 SV=1                          | 2  | 2 | 2 | 2 | 1656 | 183.6 | 5.36  | 5.45 | 2 | 1 |
| -<br>2.162E+17 | IsMasterProtein | A0A8C5FBM1 | Metastasis associated 1 family, member 2 OS=Gadus morhua OX=8049 GN=mta2 PE=4 SV=1                          | 7  | 2 | 2 | 2 | 623  | 69.6  | 9.48  | 5.45 | 2 | 1 |
| -<br>5.096E+18 | IsMasterProtein | A0A8C5B211 | Succinate-semialdehyde dehydrogenase OS=Gadus morhua OX=8049 GN=aldh5a1 PE=3 SV=1                           | 7  | 2 | 2 | 2 | 523  | 56    | 7.31  | 5.45 | 2 | 1 |
| -<br>2.052E+18 | IsMasterProtein | A0A8C4Z0D7 | SPARC (osteonectin), cwcv and kazal like domains proteoglycan 3 OS=Gadus morhua OX=8049 GN=spock3 PE=4 SV=1 | 7  | 2 | 2 | 2 | 395  | 43.9  | 5.49  | 5.44 | 2 | 1 |
| -<br>6.32E+18  | IsMasterProtein | A0A8C5BWN9 | Ubiquitin conjugating enzyme E2 L3 OS=Gadus morhua OX=8049 GN=UBE2L3 PE=3 SV=1                              | 35 | 2 | 2 | 2 | 157  | 18.3  | 8.76  | 5.44 | 2 | 1 |
| 4.6595E+16     | IsMasterProtein | A0A8C4YTN5 | Calpain-2 catalytic subunit OS=Gadus morhua OX=8049 GN=LOC115539934 PE=3 SV=1                               | 6  | 2 | 2 | 2 | 649  | 73.6  | 5.44  | 5.44 | 2 | 1 |
| 7.4692E+18     | IsMasterProtein | A0A8C5CN31 | Protein sidekick-1-like OS=Gadus morhua OX=8049 GN=LOC115541533 PE=4 SV=1                                   | 6  | 2 | 2 | 2 | 738  | 82.4  | 7.47  | 5.44 | 2 | 1 |
| 1.1849E+18     | IsMasterProtein | A0A8C5BLX9 | Formin homology 2 domain containing 3b OS=Gadus morhua OX=8049 PE=4 SV=1                                    | 3  | 2 | 2 | 2 | 1265 | 141.5 | 6.68  | 5.44 | 2 | 1 |
| -<br>1.668E+18 | IsMasterProtein | A0A8C5CCQ6 | Reverse transcriptase domain-containing protein OS=Gadus morhua OX=8049 PE=4 SV=1                           | 6  | 2 | 2 | 2 | 742  | 83.9  | 9.58  | 5.44 | 2 | 1 |
| 1.7554E+18     | IsMasterProtein | A0A8C5B8H4 | GYF domain-containing protein OS=Gadus morhua OX=8049 PE=4 SV=1                                             | 3  | 2 | 2 | 2 | 1398 | 158.3 | 6.37  | 5.43 | 2 | 1 |
| 4.3278E+18     | IsMasterProtein | A0A8C4YY66 | Zinc finger protein 521 OS=Gadus morhua OX=8049 GN=ZNF521 PE=4 SV=1                                         | 3  | 2 | 2 | 2 | 1334 | 149   | 6.98  | 5.43 | 2 | 1 |
| -<br>7.617E+18 | IsMasterProtein | A0A8C5F937 | Cyclin G associated kinase OS=Gadus morhua OX=8049 GN=gak PE=4 SV=1                                         | 3  | 2 | 2 | 2 | 1261 | 139   | 5.78  | 5.43 | 2 | 1 |
| 6.9321E+17     | IsMasterProtein | A0A8C5D081 | Phosphatidylinositol-3,4-bisphosphate 4-phosphatase OS=Gadus morhua OX=8049 GN=inpp4aa PE=3 SV=1            | 6  | 2 | 2 | 2 | 970  | 108.8 | 8.16  | 5.43 | 2 | 1 |
| -<br>8.03E+18  | IsMasterProtein | A0A8C5CZP6 | Pentaxin OS=Gadus morhua OX=8049 PE=3 SV=1                                                                  | 8  | 2 | 2 | 2 | 216  | 24    | 4.94  | 5.43 | 2 | 1 |
| -<br>2.426E+18 | IsMasterProtein | A0A8C5CTM5 | Poly [ADP-ribose] polymerase OS=Gadus morhua OX=8049 GN=LOC115531075 PE=3 SV=1                              | 3  | 2 | 2 | 2 | 1267 | 136.9 | 7.34  | 5.43 | 2 | 1 |

|                |                 |            |                                                                                                        |    |   |   |   |      |       |      |      |   |   |
|----------------|-----------------|------------|--------------------------------------------------------------------------------------------------------|----|---|---|---|------|-------|------|------|---|---|
| -<br>2.787E+18 | IsMasterProtein | A0A8C5B2N9 | SMC5-SMC6 complex localization factor 1 OS=Gadus morhua OX=8049 GN=slf1 PE=4 SV=1                      | 13 | 2 | 2 | 2 | 334  | 36.7  | 8.44 | 5.43 | 2 | 1 |
| 3.3266E+18     | IsMasterProtein | A0A8C5BID6 | Chorein N-terminal domain-containing protein OS=Gadus morhua OX=8049 PE=4 SV=1                         | 4  | 2 | 2 | 2 | 1361 | 147.8 | 6.07 | 5.43 | 2 | 1 |
| 1.1698E+18     | IsMasterProtein | A0A8C5FJQ6 | Notch receptor 3 OS=Gadus morhua OX=8049 GN=notch3 PE=3 SV=1                                           | 2  | 2 | 2 | 2 | 2451 | 264.3 | 5.68 | 5.42 | 2 | 1 |
| 7.2092E+18     | IsMasterProtein | A0A8C5F398 | Baculoviral IAP repeat containing 6 OS=Gadus morhua OX=8049 PE=4 SV=1                                  | 1  | 2 | 2 | 2 | 3441 | 371.6 | 6.23 | 5.42 | 2 | 1 |
| 4.4905E+18     | IsMasterProtein | A0A8C4Z6Z1 | Eukaryotic translation initiation factor 3 subunit K OS=Gadus morhua OX=8049 GN=EIF3K PE=3 SV=1        | 14 | 2 | 2 | 2 | 211  | 24.6  | 5.02 | 5.42 | 2 | 1 |
| 3.2667E+18     | IsMasterProtein | A0A8C4ZUL2 | Microtubule-associated protein RP/EB family member 1 OS=Gadus morhua OX=8049 GN=LOC115550022 PE=3 SV=1 | 17 | 2 | 2 | 2 | 254  | 28.3  | 6.15 | 5.41 | 2 | 1 |
| -<br>8.235E+18 | IsMasterProtein | A0A8C5A303 | Pleckstrin and Sec7 domain containing 2 OS=Gadus morhua OX=8049 PE=4 SV=1                              | 5  | 2 | 2 | 2 | 747  | 81.6  | 6.27 | 5.41 | 2 | 1 |
| -<br>6.979E+18 | IsMasterProtein | A0A8C5B3R5 | Phosphatidylinositol-3-phosphatase OS=Gadus morhua OX=8049 PE=3 SV=1                                   | 10 | 2 | 2 | 2 | 530  | 60.3  | 8.25 | 5.41 | 2 | 1 |
| 5.2134E+18     | IsMasterProtein | A0A8C5CUQ8 | Transient receptor potential cation channel, subfamily C, member 5a OS=Gadus morhua OX=8049 PE=4 SV=1  | 4  | 2 | 2 | 2 | 1046 | 117.9 | 6.79 | 5.41 | 2 | 1 |
| -7.5E+18       | IsMasterProtein | A0A8C5ASF4 | Aggrecan OS=Gadus morhua OX=8049 GN=acan PE=4 SV=1                                                     | 3  | 2 | 2 | 2 | 1394 | 147.6 | 4.84 | 5.41 | 2 | 1 |
| -<br>7.057E+18 | IsMasterProtein | A0A8C5FN20 | S-formylglutathione hydrolase OS=Gadus morhua OX=8049 GN=csd PE=3 SV=1                                 | 6  | 2 | 2 | 2 | 358  | 39.5  | 6.81 | 5.4  | 2 | 1 |
| -<br>7.024E+18 | IsMasterProtein | A0A8C4Z9J1 | Uncharacterized protein OS=Gadus morhua OX=8049 PE=4 SV=1                                              | 5  | 2 | 2 | 2 | 949  | 103.3 | 5.73 | 5.4  | 2 | 1 |
| -<br>3.39E+18  | IsMasterProtein | A0A8C4YY35 | V-maf avian musculoaponeurotic fibrosarcoma oncogene homolog Aa OS=Gadus morhua OX=8049 PE=4 SV=1      | 19 | 2 | 2 | 2 | 300  | 33.8  | 7.8  | 5.4  | 2 | 1 |
| -<br>3.035E+18 | IsMasterProtein | A0A8C4Z8Z6 | Cytoplasmic polyadenylation element binding protein 1b OS=Gadus morhua OX=8049 PE=3 SV=1               | 8  | 2 | 2 | 2 | 595  | 66.2  | 7.96 | 5.39 | 2 | 1 |
| -<br>2.449E+18 | IsMasterProtein | A0A8C5CZA1 | FAT atypical cadherin 2 OS=Gadus morhua OX=8049 GN=fat2 PE=4 SV=1                                      | 1  | 2 | 2 | 2 | 4135 | 454.9 | 5.16 | 5.39 | 2 | 1 |
| 1.6557E+18     | IsMasterProtein | A0A8C5F8B8 | Uncharacterized protein OS=Gadus morhua OX=8049 PE=3 SV=1                                              | 8  | 2 | 2 | 2 | 552  | 61.6  | 6.48 | 5.39 | 2 | 1 |
| -<br>4.667E+18 | IsMasterProtein | A0A8C5CCK0 | Teashirt homolog 1-like OS=Gadus morhua OX=8049 GN=LOC115536294 PE=3 SV=1                              | 4  | 2 | 2 | 2 | 1177 | 129.6 | 7.39 | 5.38 | 2 | 1 |
| 8.6839E+18     | IsMasterProtein | A0A8C5BSR2 | Protein c-Fos OS=Gadus morhua OX=8049 GN=fosab PE=3 SV=1                                               | 13 | 2 | 2 | 2 | 402  | 43.6  | 5.62 | 5.38 | 2 | 1 |
| -<br>6.077E+18 | IsMasterProtein | A0A8C5CTL6 | Proteasome subunit beta OS=Gadus morhua OX=8049 PE=3 SV=1                                              | 12 | 2 | 2 | 2 | 225  | 24.9  | 6.79 | 5.38 | 2 | 1 |
| -<br>1.377E+16 | IsMasterProtein | A0A8C5FBE5 | Uncharacterized protein OS=Gadus morhua OX=8049 PE=4 SV=1                                              | 5  | 2 | 2 | 2 | 957  | 107.5 | 5.4  | 5.38 | 2 | 1 |
| -<br>7.869E+18 | IsMasterProtein | A0A8C4Z7P9 | Membrane protein, palmitoylated 6a (MAGUK p55 subfamily member 6) OS=Gadus morhua OX=8049 PE=3 SV=1    | 8  | 2 | 2 | 2 | 528  | 58.8  | 7.21 | 5.37 | 2 | 1 |
| -<br>8.144E+18 | IsMasterProtein | A0A8C5CF76 | Microtubule-associated protein 1Aa OS=Gadus morhua OX=8049 GN=map1aa PE=4 SV=1                         | 2  | 2 | 2 | 2 | 2756 | 302.6 | 4.88 | 5.37 | 2 | 1 |



|                |                     |                |                                                                                                             |    |   |   |   |      |           |      |      |   |   |
|----------------|---------------------|----------------|-------------------------------------------------------------------------------------------------------------|----|---|---|---|------|-----------|------|------|---|---|
| -<br>5.95E+17  | IsMasterProt<br>ein | A0A8C5AX3<br>7 | M-phase phosphoprotein 9 OS=Gadus morhua OX=8049<br>GN=MPHOSPH9 PE=4 SV=1                                   | 3  | 2 | 2 | 2 | 1308 | 142       | 8    | 5.37 | 2 | 1 |
| -<br>3.287E+18 | IsMasterProt<br>ein | A0A8C5ACB<br>8 | 1-phosphatidylinositol 4,5-bisphosphate phosphodiesterase OS=Gadus morhua OX=8049 GN=LOC115560027 PE=4 SV=1 | 3  | 2 | 2 | 2 | 1142 | 129.<br>7 | 6.11 | 5.37 | 2 | 1 |
| -<br>3.975E+18 | IsMasterProt<br>ein | A0A8C4ZKQ<br>2 | Anthrax toxin receptor OS=Gadus morhua OX=8049 GN=antxr2a PE=3 SV=1                                         | 7  | 2 | 2 | 2 | 478  | 53        | 7.36 | 5.36 | 2 | 1 |
| -<br>1.253E+18 | IsMasterProt<br>ein | A0A8C5AFK<br>2 | Ribonuclease H OS=Gadus morhua OX=8049 PE=3 SV=1                                                            | 5  | 2 | 2 | 2 | 1121 | 126.<br>4 | 7.58 | 5.36 | 2 | 1 |
| 4.8203E+18     | IsMasterProt<br>ein | A0A8C5A7G<br>2 | Uncharacterized protein OS=Gadus morhua OX=8049 PE=4 SV=1                                                   | 4  | 2 | 2 | 2 | 1099 | 121.<br>7 | 7.42 | 5.36 | 2 | 1 |
| 4.9023E+18     | IsMasterProt<br>ein | A0A8C4ZW<br>M9 | Uncharacterized protein OS=Gadus morhua OX=8049 PE=4 SV=1                                                   | 3  | 2 | 2 | 2 | 1271 | 146.<br>8 | 6.2  | 5.36 | 2 | 1 |
| 8.7388E+18     | IsMasterProt<br>ein | A0A8C4Z004     | TBC1 domain family, member 9 (with GRAM domain) OS=Gadus morhua OX=8049 GN=tbc1d9 PE=4 SV=1                 | 4  | 2 | 2 | 2 | 1240 | 141.<br>5 | 5.26 | 5.36 | 2 | 1 |
| -<br>8.918E+18 | IsMasterProt<br>ein | A0A8C4Z4V<br>6 | Serine hydrolase like OS=Gadus morhua OX=8049 PE=4 SV=1                                                     | 6  | 2 | 2 | 2 | 317  | 36        | 6.61 | 5.35 | 2 | 1 |
| -<br>1.483E+18 | IsMasterProt<br>ein | A0A8C5AM<br>T4 | CNH domain-containing protein OS=Gadus morhua OX=8049 PE=4 SV=1                                             | 5  | 2 | 2 | 2 | 877  | 100.<br>5 | 7.47 | 5.35 | 2 | 1 |
| -<br>4.781E+18 | IsMasterProt<br>ein | A0A8C5AII8     | DNA replication ATP-dependent helicase/nuclease OS=Gadus morhua OX=8049 GN=dna2 PE=3 SV=1                   | 3  | 2 | 2 | 2 | 1386 | 152.<br>7 | 8    | 5.35 | 2 | 1 |
| -<br>4.044E+18 | IsMasterProt<br>ein | A0A8C5ACJ<br>5 | Uncharacterized protein OS=Gadus morhua OX=8049 PE=4 SV=1                                                   | 6  | 2 | 2 | 2 | 380  | 41.8      | 8.18 | 5.35 | 2 | 1 |
| -<br>7.918E+18 | IsMasterProt<br>ein | A0A8C4YTK<br>7 | N-ethylmaleimide-sensitive factor attachment protein, beta a OS=Gadus morhua OX=8049 GN=napba PE=3 SV=1     | 16 | 2 | 2 | 2 | 262  | 29.3      | 5.68 | 5.35 | 2 | 1 |
| 2.7831E+18     | IsMasterProt<br>ein | A0A8C5F6C<br>8 | Importin N-terminal domain-containing protein OS=Gadus morhua OX=8049 PE=4 SV=1                             | 6  | 2 | 2 | 2 | 873  | 98.3      | 4.86 | 5.34 | 2 | 1 |
| -<br>4.573E+18 | IsMasterProt<br>ein | A0A8C5F7P5     | Cugbp, Elav-like family member 1 OS=Gadus morhua OX=8049 GN=celfl PE=3 SV=1                                 | 4  | 2 | 2 | 2 | 523  | 56        | 7.4  | 5.34 | 2 | 1 |
| 8.395E+17      | IsMasterProt<br>ein | A0A8C5ACI<br>2 | Signal-induced proliferation-associated 1-like protein 2 OS=Gadus morhua OX=8049 GN=LOC115540071 PE=4 SV=1  | 2  | 2 | 2 | 2 | 1526 | 162.<br>9 | 7.53 | 5.34 | 2 | 1 |
| 4.925E+18      | IsMasterProt<br>ein | A0A8C5F6J1     | Sap30-like OS=Gadus morhua OX=8049 GN=SAP30L PE=3 SV=1                                                      | 21 | 2 | 2 | 2 | 178  | 20.3      | 9.29 | 5.34 | 2 | 1 |
| -<br>5.903E+18 | IsMasterProt<br>ein | A0A8C4ZN0<br>2 | Multiple EGF-like-domains 8 OS=Gadus morhua OX=8049 PE=4 SV=1                                               | 2  | 2 | 2 | 2 | 2702 | 293.<br>2 | 6.6  | 5.34 | 2 | 1 |
| -<br>8.868E+18 | IsMasterProt<br>ein | A0A8C5FM0<br>2 | Mannose receptor C-type 1 OS=Gadus morhua OX=8049 GN=MRC1 PE=4 SV=1                                         | 2  | 2 | 2 | 2 | 1311 | 148.<br>4 | 6.84 | 5.34 | 2 | 1 |
| 6.8515E+18     | IsMasterProt<br>ein | A0A8C5CA0<br>2 | Oxoglutarate dehydrogenase (succinyl-transferring) OS=Gadus morhua OX=8049 PE=3 SV=1                        | 6  | 2 | 2 | 2 | 982  | 110       | 6.55 | 5.33 | 2 | 1 |
| -<br>1.725E+18 | IsMasterProt<br>ein | A0A8C5CSN<br>9 | Phosphatidylinositol-3,5-bisphosphate 3-phosphatase OS=Gadus morhua OX=8049 PE=3 SV=1                       | 9  | 2 | 2 | 2 | 598  | 68.5      | 7.75 | 5.33 | 2 | 1 |
| -<br>3.933E+18 | IsMasterProt<br>ein | A0A8C5D4C<br>2 | Coronin OS=Gadus morhua OX=8049 GN=CORO7 PE=3 SV=1                                                          | 5  | 2 | 2 | 2 | 883  | 95.5      | 6.2  | 5.33 | 2 | 1 |
| 4.3511E+18     | IsMasterProt<br>ein | A0A8C5C238     | Tudor domain-containing protein 3 OS=Gadus morhua OX=8049 GN=TDRD3 PE=4 SV=1                                | 5  | 2 | 2 | 2 | 861  | 94        | 9.45 | 5.33 | 2 | 1 |

|                |                     |                |                                                                                                   |    |   |   |   |      |           |           |      |   |   |
|----------------|---------------------|----------------|---------------------------------------------------------------------------------------------------|----|---|---|---|------|-----------|-----------|------|---|---|
| -<br>2.767E+18 | IsMasterProt<br>ein | A0A8C5AYG<br>5 | Myosin IXA OS=Gadus morhua OX=8049 GN=MYO9A PE=3 SV=1                                             | 2  | 2 | 2 | 2 | 2330 | 265.<br>7 | 8.78      | 5.33 | 2 | 1 |
| -<br>5.506E+18 | IsMasterProt<br>ein | A0A8C5FA5<br>1 | Cell division cycle 16 homolog (S. cerevisiae) OS=Gadus morhua OX=8049 PE=4 SV=1                  | 8  | 2 | 2 | 2 | 594  | 67.7      | 6.01      | 5.33 | 2 | 1 |
| -<br>3.677E+18 | IsMasterProt<br>ein | A0A8C5A1C<br>5 | Chromobox homolog 8a (Pc class homolog, Drosophila) OS=Gadus morhua OX=8049 PE=4 SV=1             | 10 | 2 | 2 | 2 | 425  | 48.3      | 10.4<br>5 | 5.33 | 2 | 1 |
| 4.5324E+18     | IsMasterProt<br>ein | A0A8C5C9S<br>4 | Checkpoint protein OS=Gadus morhua OX=8049 GN=hus1 PE=3 SV=1                                      | 12 | 2 | 2 | 2 | 285  | 31.8      | 7.65      | 5.32 | 2 | 1 |
| 6.0387E+18     | IsMasterProt<br>ein | A0A8C5BZV<br>6 | HECT-type E3 ubiquitin transferase OS=Gadus morhua OX=8049 PE=4 SV=1                              | 1  | 2 | 2 | 2 | 4679 | 510.<br>4 | 6.7       | 5.32 | 2 | 1 |
| -<br>5.731E+18 | IsMasterProt<br>ein | A0A8C5AS7<br>5 | Glutathione peroxidase OS=Gadus morhua OX=8049 PE=3 SV=1                                          | 19 | 2 | 2 | 2 | 151  | 17.2      | 6.57      | 5.32 | 2 | 1 |
| -<br>3.884E+18 | IsMasterProt<br>ein | A0A8C5AVX<br>4 | Kelch-like protein 22 OS=Gadus morhua OX=8049 GN=klhl22 PE=4 SV=1                                 | 8  | 2 | 2 | 2 | 633  | 70.7      | 6.07      | 5.32 | 2 | 1 |
| -<br>6.028E+18 | IsMasterProt<br>ein | A0A8C5ACD<br>3 | Uncharacterized protein OS=Gadus morhua OX=8049 PE=4 SV=1                                         | 4  | 2 | 2 | 2 | 709  | 77.4      | 9.31      | 5.32 | 2 | 1 |
| -<br>6.199E+18 | IsMasterProt<br>ein | A0A8C4ZCS<br>8 | Ectopic P-granules autophagy protein 5 homolog (C. elegans) OS=Gadus morhua OX=8049 PE=3 SV=1     | 2  | 2 | 2 | 2 | 2323 | 256.<br>5 | 7.14      | 5.32 | 2 | 1 |
| 3.0476E+18     | IsMasterProt<br>ein | A0A8C5AA6<br>0 | Synaptopodin 2-like b OS=Gadus morhua OX=8049 PE=4 SV=1                                           | 4  | 2 | 2 | 2 | 1406 | 148.<br>4 | 9         | 5.32 | 2 | 1 |
| -<br>2.083E+18 | IsMasterProt<br>ein | A0A8C5AP1<br>3 | LIM zinc-binding domain-containing protein OS=Gadus morhua OX=8049 PE=4 SV=1                      | 3  | 2 | 2 | 2 | 1683 | 189.<br>9 | 9.14      | 5.32 | 2 | 1 |
| 5.0327E+18     | IsMasterProt<br>ein | A0A8C4Z961     | Protein MCM10 homolog OS=Gadus morhua OX=8049 GN=mcm10 PE=3 SV=1                                  | 3  | 2 | 2 | 2 | 1004 | 109.<br>3 | 9.14      | 5.32 | 2 | 1 |
| 4.0848E+18     | IsMasterProt<br>ein | A0A8C5CMJ<br>9 | F-box protein 43 OS=Gadus morhua OX=8049 GN=FBXO43 PE=4 SV=1                                      | 6  | 2 | 2 | 2 | 714  | 77.8      | 9.11      | 5.31 | 2 | 1 |
| 6.1725E+18     | IsMasterProt<br>ein | A0A8C5FX6<br>2 | Remodeling and spacing factor 1b, tandem duplicate 1 OS=Gadus morhua OX=8049 GN=rsf1b.1 PE=4 SV=1 | 2  | 2 | 2 | 2 | 2156 | 236.<br>2 | 5.64      | 5.31 | 2 | 1 |
| -<br>7.519E+18 | IsMasterProt<br>ein | A0A8C5AC8<br>1 | DUF3715 domain-containing protein OS=Gadus morhua OX=8049 PE=3 SV=1                               | 2  | 2 | 2 | 2 | 3150 | 347.<br>7 | 5.08      | 5.31 | 2 | 1 |
| -3.6E+18       | IsMasterProt<br>ein | A0A8C5A6Y<br>5 | Stromal interaction molecule 2b OS=Gadus morhua OX=8049 GN=stim2b PE=4 SV=1                       | 7  | 2 | 2 | 2 | 817  | 89.7      | 8.5       | 5.31 | 2 | 1 |
| 3.5886E+18     | IsMasterProt<br>ein | A0A8C4YXK<br>1 | Integrin-linked protein kinase OS=Gadus morhua OX=8049 PE=4 SV=1                                  | 8  | 2 | 2 | 2 | 459  | 52.1      | 7.39      | 5.31 | 2 | 1 |
| 8.4834E+18     | IsMasterProt<br>ein | A0A8C5C2F<br>7 | RNA binding protein, mRNA processing factor 2b OS=Gadus morhua OX=8049 PE=4 SV=1                  | 21 | 2 | 2 | 2 | 202  | 22.1      | 8.15      | 5.31 | 2 | 1 |
| -<br>2.292E+18 | IsMasterProt<br>ein | A0A8C5C7L<br>1 | Metabotropic glutamate receptor 8-like OS=Gadus morhua OX=8049 GN=LOC115551429 PE=3 SV=1          | 5  | 2 | 2 | 2 | 911  | 101.<br>1 | 8.06      | 5.31 | 2 | 1 |
| -<br>9.163E+18 | IsMasterProt<br>ein | A0A8C4ZJ18     | Ubinuclein 2a OS=Gadus morhua OX=8049 PE=3 SV=1                                                   | 4  | 2 | 2 | 2 | 924  | 99.3      | 9.38      | 5.31 | 2 | 1 |
| -<br>4.421E+18 | IsMasterProt<br>ein | A0A8C5BIJ0     | Rhomboid 5 homolog 1b (Drosophila) OS=Gadus morhua OX=8049 GN=rhbd1b PE=3 SV=1                    | 7  | 2 | 2 | 2 | 742  | 83.7      | 8.5       | 5.31 | 2 | 1 |
| -<br>7.08E+18  | IsMasterProt<br>ein | A0A8C5CXI<br>4 | Rho GDP-dissociation inhibitor 1-like OS=Gadus morhua OX=8049 GN=ARHGDI4 PE=3 SV=1                | 12 | 2 | 2 | 2 | 203  | 23        | 5.11      | 5.31 | 2 | 1 |

|                |                 |            |                                                                                                  |    |   |   |   |      |       |       |      |   |   |
|----------------|-----------------|------------|--------------------------------------------------------------------------------------------------|----|---|---|---|------|-------|-------|------|---|---|
| -<br>5.899E+18 | IsMasterProtein | A0A8C5CVF2 | Uncharacterized protein OS=Gadus morhua OX=8049 PE=3 SV=1                                        | 7  | 2 | 2 | 2 | 548  | 58.3  | 8.05  | 5.3  | 2 | 1 |
| 3.2968E+18     | IsMasterProtein | A0A8C5AB59 | Si:ch73-234b20.5 OS=Gadus morhua OX=8049 PE=3 SV=1                                               | 28 | 2 | 2 | 2 | 98   | 11.3  | 9.52  | 5.3  | 2 | 1 |
| -<br>1.747E+18 | IsMasterProtein | A0A8C5BRW0 | DNA helicase OS=Gadus morhua OX=8049 GN=chd1 PE=4 SV=1                                           | 3  | 2 | 2 | 2 | 1639 | 186.7 | 7.87  | 5.3  | 2 | 1 |
| 5.0479E+18     | IsMasterProtein | A0A8C5AP22 | Intraflagellar transport 140 homolog (Chlamydomonas) OS=Gadus morhua OX=8049 GN=ifr140 PE=4 SV=1 | 3  | 2 | 2 | 2 | 1377 | 153.9 | 6.58  | 5.3  | 2 | 1 |
| 1.0784E+18     | IsMasterProtein | A0A8C5BSR1 | Prefoldin subunit 2 OS=Gadus morhua OX=8049 PE=3 SV=1                                            | 16 | 2 | 2 | 2 | 218  | 23.8  | 9.63  | 5.3  | 2 | 1 |
| -<br>9.187E+18 | IsMasterProtein | A0A8C5F6C2 | Keratin, type II cytoskeletal 8-like OS=Gadus morhua OX=8049 GN=LOC115542795 PE=4 SV=1           | 8  | 2 | 2 | 2 | 358  | 41.5  | 5.11  | 5.29 | 2 | 1 |
| -<br>2.012E+18 | IsMasterProtein | A0A8C4ZH51 | Growth factor receptor-bound protein 10-like OS=Gadus morhua OX=8049 GN=LOC115535365 PE=3 SV=1   | 5  | 2 | 2 | 2 | 605  | 68.4  | 7.65  | 5.29 | 2 | 1 |
| -<br>2.241E+18 | IsMasterProtein | A0A8C5F9L4 | Transcription elongation factor spt6 OS=Gadus morhua OX=8049 GN=SUP7H PE=3 SV=1                  | 2  | 2 | 2 | 2 | 1522 | 173.3 | 5.54  | 5.29 | 2 | 1 |
| -<br>4.194E+18 | IsMasterProtein | A0A8C4Z6J7 | F-box only protein 40-like OS=Gadus morhua OX=8049 GN=LOC115547745 PE=4 SV=1                     | 7  | 2 | 2 | 2 | 692  | 76.5  | 6.7   | 5.29 | 2 | 1 |
| -<br>7.991E+18 | IsMasterProtein | A0A8C5CJA2 | Plakophilin 4 OS=Gadus morhua OX=8049 GN=PKP4 PE=3 SV=1                                          | 3  | 2 | 2 | 2 | 1195 | 130.2 | 8.94  | 5.29 | 2 | 1 |
| -<br>4.341E+18 | IsMasterProtein | A0A8C5B0F2 | Zinc finger, FYVE domain containing 9b OS=Gadus morhua OX=8049 PE=4 SV=1                         | 3  | 2 | 2 | 2 | 994  | 110.8 | 5.87  | 5.29 | 2 | 1 |
| -<br>8.349E+18 | IsMasterProtein | A0A8C5D1C4 | Dynactin subunit 1 OS=Gadus morhua OX=8049 PE=3 SV=1                                             | 2  | 2 | 2 | 2 | 1199 | 132   | 5.45  | 5.29 | 2 | 1 |
| 5.6733E+18     | IsMasterProtein | A0A8C5BAK9 | F-actin monooxygenase OS=Gadus morhua OX=8049 PE=3 SV=1                                          | 1  | 2 | 2 | 2 | 2005 | 221.5 | 8.31  | 5.29 | 2 | 1 |
| -<br>6.544E+18 | IsMasterProtein | A0A8C4ZM80 | 40S ribosomal protein S23 OS=Gadus morhua OX=8049 GN=rps23 PE=3 SV=1                             | 16 | 2 | 2 | 2 | 141  | 15.7  | 10.48 | 5.29 | 2 | 1 |
| -<br>5.21E+18  | IsMasterProtein | A0A8C4Z2A7 | Sushi repeat-containing protein SRPX2 OS=Gadus morhua OX=8049 GN=srp2 PE=4 SV=1                  | 6  | 2 | 2 | 2 | 457  | 51.7  | 7.49  | 5.29 | 2 | 1 |
| -<br>6.533E+18 | IsMasterProtein | A0A8C5BZW2 | Hyaluronan and proteoglycan link protein 4 OS=Gadus morhua OX=8049 PE=4 SV=1                     | 9  | 2 | 2 | 2 | 509  | 58.7  | 6.25  | 5.28 | 2 | 1 |
| -<br>9.062E+18 | IsMasterProtein | A0A8C5BDW0 | Tumor necrosis factor receptor superfamily member 6 OS=Gadus morhua OX=8049 PE=4 SV=1            | 12 | 2 | 2 | 2 | 280  | 30.4  | 8.09  | 5.28 | 2 | 1 |
| -<br>1.512E+18 | IsMasterProtein | A0A8C5FRZ7 | RNA cytidine acetyltransferase OS=Gadus morhua OX=8049 GN=rat10 PE=3 SV=1                        | 3  | 2 | 3 | 2 | 982  | 110.8 | 8.35  | 5.27 | 2 | 1 |
| -<br>9.059E+18 | IsMasterProtein | A0A8C5A803 | Speckle type BTB/POZ protein like a OS=Gadus morhua OX=8049 GN=SPOPL PE=3 SV=1                   | 9  | 2 | 2 | 2 | 374  | 42.2  | 6.15  | 5.27 | 2 | 1 |
| 3.1617E+18     | IsMasterProtein | A0A8C5A9D4 | Si:rp71-1g18.13 OS=Gadus morhua OX=8049 PE=3 SV=1                                                | 3  | 2 | 2 | 2 | 892  | 96.6  | 5.49  | 5.27 | 2 | 1 |
| -<br>5.26E+17  | IsMasterProtein | A0A8C5C0W5 | Neurobeachin-like 2 OS=Gadus morhua OX=8049 PE=4 SV=1                                            | 2  | 2 | 2 | 2 | 2806 | 313.8 | 6.39  | 5.27 | 2 | 1 |

|                |                 |            |                                                                                                   |    |   |   |   |      |       |      |      |   |   |
|----------------|-----------------|------------|---------------------------------------------------------------------------------------------------|----|---|---|---|------|-------|------|------|---|---|
| -<br>9.209E+18 | IsMasterProtein | A0A8C5A9M5 | Transporter OS=Gadus morhua OX=8049 GN=slc6a8 PE=3 SV=1                                           | 9  | 2 | 2 | 2 | 557  | 62.2  | 6.52 | 5.27 | 2 | 1 |
| -<br>1.011E+17 | IsMasterProtein | A0A8C5A5F7 | T-complex protein 1 subunit beta OS=Gadus morhua OX=8049 GN=cct2 PE=3 SV=1                        | 9  | 2 | 2 | 2 | 535  | 57.7  | 6.44 | 5.27 | 2 | 1 |
| -<br>7.425E+18 | IsMasterProtein | A0A8C5AXE4 | Uncharacterized protein OS=Gadus morhua OX=8049 PE=4 SV=1                                         | 3  | 2 | 2 | 2 | 1078 | 118   | 6.87 | 5.27 | 2 | 1 |
| -<br>6.164E+17 | IsMasterProtein | A0A8C5FKB7 | EGF containing fibulin extracellular matrix protein 1 OS=Gadus morhua OX=8049 GN=efemp1 PE=4 SV=1 | 6  | 2 | 2 | 2 | 410  | 45.8  | 5.5  | 5.27 | 2 | 1 |
| 7.4395E+18     | IsMasterProtein | A0A8C5CT50 | IQ motif containing GTPase activating protein 1 OS=Gadus morhua OX=8049 GN=iqgap1 PE=4 SV=1       | 3  | 2 | 2 | 2 | 1593 | 180.3 | 6.14 | 5.26 | 2 | 1 |
| 3.8337E+18     | IsMasterProtein | A0A8C5A173 | Shootin-1 OS=Gadus morhua OX=8049 GN=shtn1 PE=3 SV=1                                              | 7  | 2 | 2 | 2 | 533  | 60.8  | 5.94 | 5.26 | 2 | 1 |
| -<br>5.328E+18 | IsMasterProtein | A0A8C5CL82 | Uncharacterized protein OS=Gadus morhua OX=8049 PE=3 SV=1                                         | 1  | 2 | 2 | 2 | 2584 | 276.5 | 6.09 | 5.26 | 2 | 1 |
| -<br>9.03E+18  | IsMasterProtein | A0A8C5C4E8 | RNA helicase OS=Gadus morhua OX=8049 GN=ddx47 PE=3 SV=1                                           | 7  | 2 | 2 | 2 | 596  | 64.6  | 5.88 | 5.25 | 2 | 1 |
| -<br>5.317E+17 | IsMasterProtein | A0A8C4ZBR9 | RAB GTPase activating protein 1-like OS=Gadus morhua OX=8049 GN=rabgap11 PE=4 SV=1                | 6  | 2 | 2 | 2 | 796  | 90.1  | 5.62 | 5.25 | 2 | 1 |
| -<br>7.806E+18 | IsMasterProtein | A0A8C5B091 | Family with sequence similarity 83 member Ha OS=Gadus morhua OX=8049 GN=fam83ha PE=3 SV=1         | 2  | 2 | 2 | 2 | 1635 | 180.5 | 5.1  | 5.25 | 2 | 1 |
| -<br>1.228E+18 | IsMasterProtein | A0A8C5C579 | F-actin-capping protein subunit alpha OS=Gadus morhua OX=8049 GN=CAPZA2 PE=3 SV=1                 | 11 | 2 | 2 | 2 | 265  | 30.4  | 6.54 | 5.25 | 2 | 1 |
| -<br>8.128E+18 | IsMasterProtein | A0A8C5FIF0 | Uncharacterized protein OS=Gadus morhua OX=8049 PE=4 SV=1                                         | 3  | 2 | 2 | 2 | 917  | 99.2  | 4.84 | 5.25 | 2 | 1 |
| 8.6299E+18     | IsMasterProtein | A0A8C4ZCB5 | Receptor tyrosine kinase-like orphan receptor 2 OS=Gadus morhua OX=8049 GN=rort2 PE=3 SV=1        | 6  | 2 | 2 | 2 | 936  | 103.6 | 6.37 | 5.25 | 2 | 1 |
| 3.7092E+18     | IsMasterProtein | A0A8C5F6F8 | Phosphatidylinositol 4-kinase type 2 OS=Gadus morhua OX=8049 GN=pi4k2a PE=3 SV=1                  | 7  | 2 | 2 | 2 | 447  | 51.3  | 8.22 | 5.25 | 2 | 1 |
| -<br>7.962E+18 | IsMasterProtein | A0A8C5C1C7 | Zinc-binding protein A33-like OS=Gadus morhua OX=8049 GN=LOC115534196 PE=4 SV=1                   | 9  | 2 | 2 | 2 | 448  | 51.1  | 8.03 | 5.24 | 2 | 1 |
| 6.2183E+18     | IsMasterProtein | A0A8C5CPN5 | Sodium/hydrogen exchanger OS=Gadus morhua OX=8049 PE=3 SV=1                                       | 6  | 2 | 2 | 2 | 672  | 75.4  | 8.91 | 5.24 | 2 | 1 |
| -<br>8.966E+18 | IsMasterProtein | A0A8C5F9L5 | PDZ domain containing 3b OS=Gadus morhua OX=8049 PE=4 SV=1                                        | 9  | 2 | 2 | 2 | 505  | 54.7  | 6.2  | 5.24 | 2 | 1 |
| -<br>1.212E+18 | IsMasterProtein | A0A8C5AUE4 | FERM domain-containing protein 5-like OS=Gadus morhua OX=8049 GN=LOC115550701 PE=4 SV=1           | 6  | 2 | 2 | 2 | 490  | 55    | 8.73 | 5.24 | 2 | 1 |
| -<br>8.958E+18 | IsMasterProtein | A0A8C5A2V8 | ATP-binding cassette, sub-family B (MDR/TAP), member 4 OS=Gadus morhua OX=8049 GN=abcb4 PE=4 SV=1 | 3  | 2 | 2 | 2 | 1237 | 136.5 | 7.11 | 5.24 | 2 | 1 |
| -<br>5.889E+18 | IsMasterProtein | A0A8C5BR01 | Ribosomal protein S6 kinase, polypeptide 5 OS=Gadus morhua OX=8049 PE=3 SV=1                      | 8  | 2 | 2 | 2 | 458  | 51    | 8.57 | 5.24 | 2 | 1 |
| -<br>6.569E+18 | IsMasterProtein | A0A8C4Z2K5 | Enoyl-CoA hydratase OS=Gadus morhua OX=8049 GN=hadhab PE=3 SV=1                                   | 4  | 2 | 2 | 2 | 762  | 82    | 8.68 | 5.23 | 2 | 1 |

|            |                 |            |                                                                                                            |    |   |   |   |      |       |      |      |   |   |
|------------|-----------------|------------|------------------------------------------------------------------------------------------------------------|----|---|---|---|------|-------|------|------|---|---|
| 1.9389E+17 | IsMasterProtein | A0A8C5CDD9 | GCN1 activator of EIF2AK4 OS=Gadus morhua OX=8049 PE=3 SV=1                                                | 2  | 2 | 2 | 2 | 2624 | 286.2 | 6.81 | 5.23 | 2 | 1 |
| 6.083E+18  | IsMasterProtein | A0A8C5CC05 | Neutral sphingomyelinase (N-SMase) activation associated factor OS=Gadus morhua OX=8049 GN=nsmaf PE=4 SV=1 | 7  | 2 | 2 | 2 | 893  | 101.7 | 5.43 | 5.23 | 2 | 1 |
| 2.182E+18  | IsMasterProtein | A0A8C5FV39 | Ubiquitin specific peptidase 31 OS=Gadus morhua OX=8049 GN=usp31 PE=4 SV=1                                 | 2  | 2 | 2 | 2 | 1308 | 144.7 | 9.09 | 5.23 | 2 | 1 |
| 8.397E+18  | IsMasterProtein | A0A8C5D261 | Serine/arginine repetitive matrix protein 1-like OS=Gadus morhua OX=8049 GN=LOC115554003 PE=3 SV=1         | 5  | 2 | 2 | 2 | 956  | 107.6 | 9.74 | 5.23 | 2 | 1 |
| 6.353E+18  | IsMasterProtein | A0A8C5F570 | Uncharacterized LOC115558435 OS=Gadus morhua OX=8049 GN=LOC115558435 PE=3 SV=1                             | 3  | 2 | 2 | 2 | 1288 | 144.1 | 7.01 | 5.23 | 2 | 1 |
| 5.633E+18  | IsMasterProtein | A0A8C5AZY7 | alpha-1,2-Mannosidase OS=Gadus morhua OX=8049 PE=3 SV=1                                                    | 3  | 2 | 2 | 2 | 616  | 69.3  | 6.47 | 5.23 | 2 | 1 |
| 7.881E+18  | IsMasterProtein | A0A8C5AFM5 | Sodium/potassium-transporting ATPase subunit alpha OS=Gadus morhua OX=8049 GN=atp4a PE=3 SV=1              | 3  | 2 | 2 | 2 | 1013 | 112.9 | 5.69 | 5.23 | 2 | 1 |
| 6.254E+18  | IsMasterProtein | A0A8C5CZM7 | Metalloendopeptidase OS=Gadus morhua OX=8049 GN=LOC115555288 PE=4 SV=1                                     | 6  | 2 | 2 | 2 | 670  | 75.6  | 8.18 | 5.22 | 2 | 1 |
| 1.881E+18  | IsMasterProtein | A0A8C5B8J1 | Tau tubulin kinase 2b OS=Gadus morhua OX=8049 PE=4 SV=1                                                    | 6  | 2 | 2 | 2 | 617  | 67.4  | 7.46 | 5.22 | 2 | 1 |
| 9.316E+17  | IsMasterProtein | A0A8C5AZF0 | Serrate RNA effector molecule homolog OS=Gadus morhua OX=8049 GN=LOC115529604 PE=3 SV=1                    | 4  | 2 | 2 | 2 | 839  | 94.6  | 6.33 | 5.22 | 2 | 1 |
| 4.763E+18  | IsMasterProtein | A0A8C5BLV9 | Mitochondrial ribosomal protein S28 OS=Gadus morhua OX=8049 PE=4 SV=1                                      | 17 | 2 | 2 | 2 | 137  | 15.2  | 9    | 5.22 | 2 | 1 |
| 7.985E+18  | IsMasterProtein | A0A8C5CQ23 | HELP domain-containing protein OS=Gadus morhua OX=8049 PE=3 SV=1                                           | 4  | 2 | 2 | 2 | 800  | 88.6  | 6.79 | 5.22 | 2 | 1 |
| 2.994E+18  | IsMasterProtein | A0A8C5B4A7 | DUF4371 domain-containing protein OS=Gadus morhua OX=8049 PE=4 SV=1                                        | 10 | 2 | 2 | 2 | 496  | 56.4  | 6.4  | 5.22 | 2 | 1 |
| 6.075E+18  | IsMasterProtein | A0A8C4Z320 | Uncharacterized protein OS=Gadus morhua OX=8049 PE=4 SV=1                                                  | 13 | 2 | 2 | 2 | 145  | 15    | 5.91 | 5.21 | 2 | 1 |
| 6.346E+18  | IsMasterProtein | A0A8C5AKB8 | Thyroid hormone receptor interactor 11 OS=Gadus morhua OX=8049 PE=4 SV=1                                   | 2  | 2 | 2 | 2 | 1918 | 214.7 | 5.33 | 5.21 | 2 | 1 |
| 3.866E+18  | IsMasterProtein | A0A8C5F614 | Solute carrier family 38 member 3a OS=Gadus morhua OX=8049 PE=4 SV=1                                       | 7  | 2 | 2 | 2 | 510  | 55.8  | 6.71 | 5.21 | 2 | 1 |
| 5.602E+18  | IsMasterProtein | A0A8C5C2U1 | Gem nuclear organelle associated protein 5 OS=Gadus morhua OX=8049 GN=GEMIN5 PE=4 SV=1                     | 5  | 2 | 2 | 2 | 1261 | 135.7 | 6.33 | 5.2  | 2 | 1 |
| 4.542E+18  | IsMasterProtein | A0A8C4ZZL9 | Prostaglandin reductase 1 OS=Gadus morhua OX=8049 GN=ptgr1 PE=3 SV=1                                       | 6  | 2 | 2 | 2 | 329  | 35.9  | 6.35 | 5.2  | 2 | 1 |
| 2.207E+18  | IsMasterProtein | A0A8C5BZP0 | Proteasome activator subunit 2 OS=Gadus morhua OX=8049 GN=PSME2 PE=3 SV=1                                  | 9  | 2 | 2 | 2 | 221  | 25    | 5.91 | 5.2  | 2 | 1 |
| 2.537E+18  | IsMasterProtein | A0A8C4ZRR2 | ATP binding cassette subfamily D member 2 OS=Gadus morhua OX=8049 GN=ABCD2 PE=4 SV=1                       | 7  | 2 | 2 | 2 | 733  | 82.2  | 8.48 | 5.2  | 2 | 1 |

|                |                 |            |                                                                                               |    |   |   |   |      |       |      |      |   |   |
|----------------|-----------------|------------|-----------------------------------------------------------------------------------------------|----|---|---|---|------|-------|------|------|---|---|
| -<br>1.076E+18 | IsMasterProtein | A0A8C5BAQ1 | Unconventional myosin-VI OS=Gadus morhua OX=8049 PE=3 SV=1                                    | 5  | 2 | 2 | 2 | 927  | 106.4 | 8.98 | 5.2  | 2 | 1 |
| -<br>8.227E+18 | IsMasterProtein | A0A8C5APS5 | Annexin OS=Gadus morhua OX=8049 GN=anxa11a PE=3 SV=1                                          | 7  | 2 | 2 | 2 | 545  | 57.8  | 8.66 | 5.2  | 2 | 1 |
| 4.0375E+18     | IsMasterProtein | A0A8C5AVU2 | [Histone H3]-lysine(4) N-methyltransferase OS=Gadus morhua OX=8049 PE=4 SV=1                  | 1  | 2 | 2 | 2 | 3980 | 433.5 | 7.31 | 5.2  | 2 | 1 |
| -<br>5.047E+18 | IsMasterProtein | A0A8C5B5M6 | Catalase OS=Gadus morhua OX=8049 GN=cat PE=3 SV=1                                             | 7  | 2 | 2 | 2 | 502  | 56.6  | 7.31 | 5.2  | 2 | 1 |
| -<br>2.386E+18 | IsMasterProtein | A0A8C4ZZY8 | Uncharacterized protein OS=Gadus morhua OX=8049 PE=4 SV=1                                     | 3  | 2 | 2 | 2 | 1162 | 130.2 | 6.52 | 5.2  | 2 | 1 |
| -<br>7.389E+18 | IsMasterProtein | A0A8C4ZIV8 | Dipeptidyl-peptidase 7 OS=Gadus morhua OX=8049 GN=dpp7 PE=3 SV=1                              | 6  | 2 | 2 | 2 | 492  | 54.4  | 5.71 | 5.2  | 2 | 1 |
| 1.8319E+18     | IsMasterProtein | A0A8C5FVS5 | Receptor protein serine/threonine kinase OS=Gadus morhua OX=8049 GN=bmpr1ba PE=3 SV=1         | 10 | 2 | 2 | 2 | 488  | 55.2  | 8.25 | 5.19 | 2 | 1 |
| 7.6722E+18     | IsMasterProtein | A0A8C4ZQX9 | Fibronectin leucine rich transmembrane 3 OS=Gadus morhua OX=8049 GN=flrt3 PE=4 SV=1           | 5  | 2 | 2 | 2 | 650  | 72.9  | 6.9  | 5.19 | 2 | 1 |
| -<br>9.149E+18 | IsMasterProtein | A0A8C5B929 | Uncharacterized protein OS=Gadus morhua OX=8049 PE=3 SV=1                                     | 8  | 2 | 2 | 2 | 387  | 43.6  | 5.81 | 5.19 | 2 | 1 |
| 4.7896E+18     | IsMasterProtein | A0A8C5A535 | Arginine--tRNA ligase, cytoplasmic OS=Gadus morhua OX=8049 GN=rars1 PE=3 SV=1                 | 4  | 2 | 2 | 2 | 655  | 74.3  | 7.75 | 5.19 | 2 | 1 |
| -<br>5.502E+18 | IsMasterProtein | A0A8C4Z018 | Excision repair cross-complementation group 6 OS=Gadus morhua OX=8049 PE=4 SV=1               | 5  | 2 | 2 | 2 | 959  | 108.1 | 9.31 | 5.19 | 2 | 1 |
| -<br>1.959E+18 | IsMasterProtein | A0A8C5A854 | USP domain-containing protein OS=Gadus morhua OX=8049 PE=4 SV=1                               | 11 | 2 | 2 | 2 | 474  | 53.9  | 5.17 | 5.19 | 2 | 1 |
| -<br>8.419E+18 | IsMasterProtein | A0A8C5CSV7 | Furin (paired basic amino acid cleaving enzyme) b OS=Gadus morhua OX=8049 PE=4 SV=1           | 4  | 2 | 2 | 2 | 834  | 90.8  | 8.44 | 5.19 | 2 | 1 |
| 8.344E+18      | IsMasterProtein | A0A8C5CMN6 | Matrix-remodelling associated 5a OS=Gadus morhua OX=8049 PE=4 SV=1                            | 1  | 2 | 2 | 2 | 2636 | 283.4 | 9.39 | 5.19 | 2 | 1 |
| -<br>7.503E+18 | IsMasterProtein | A0A8C5B856 | mRNA export factor GLE1 OS=Gadus morhua OX=8049 GN=gle1 PE=3 SV=1                             | 4  | 2 | 2 | 2 | 702  | 79.4  | 8.05 | 5.19 | 2 | 1 |
| -<br>4.801E+18 | IsMasterProtein | A0A8C5AIF1 | 3-hydroxyisobutyrate dehydrogenase OS=Gadus morhua OX=8049 PE=3 SV=1                          | 13 | 2 | 3 | 2 | 326  | 34.6  | 6.25 | 5.18 | 2 | 1 |
| 2.1464E+18     | IsMasterProtein | A0A8C5FPL8 | Reverse transcriptase domain-containing protein OS=Gadus morhua OX=8049 PE=4 SV=1             | 4  | 2 | 2 | 2 | 807  | 90.5  | 9.38 | 5.18 | 2 | 1 |
| 2.2862E+17     | IsMasterProtein | A0A8C4ZX27 | Microtubule-associated protein OS=Gadus morhua OX=8049 PE=4 SV=1                              | 2  | 2 | 2 | 2 | 1551 | 162.3 | 5.57 | 5.18 | 2 | 1 |
| 8.5475E+18     | IsMasterProtein | A0A8C5AEA4 | DENN domain-containing protein 2D-like OS=Gadus morhua OX=8049 GN=LOC115541485 PE=4 SV=1      | 11 | 2 | 2 | 2 | 456  | 51.9  | 8.69 | 5.18 | 2 | 1 |
| 2.1432E+18     | IsMasterProtein | A0A8C4ZS64 | Leucine rich repeat containing 8 VRAC subunit Da OS=Gadus morhua OX=8049 GN=lrrc8da PE=3 SV=1 | 4  | 2 | 2 | 2 | 854  | 97.5  | 7.42 | 5.18 | 2 | 1 |
| -<br>4.459E+18 | IsMasterProtein | A0A8C4ZDV8 | C-1-tetrahydrofolate synthase, cytoplasmic OS=Gadus morhua OX=8049 GN=mthfd1b PE=3 SV=1       | 4  | 2 | 2 | 2 | 924  | 99.3  | 7.36 | 5.18 | 2 | 1 |
| -<br>8.398E+18 | IsMasterProtein | A0A8C5A298 | DNA-directed RNA polymerase subunit beta OS=Gadus morhua OX=8049 GN=polr3b PE=3 SV=1          | 2  | 2 | 2 | 2 | 1130 | 127.8 | 8.57 | 5.18 | 2 | 1 |



|            |                 |            |                                                                                                                            |    |   |   |   |      |       |      |      |   |   |
|------------|-----------------|------------|----------------------------------------------------------------------------------------------------------------------------|----|---|---|---|------|-------|------|------|---|---|
| 8.9363E+18 | IsMasterProtein | A0A8C5ALD0 | DUF2428 domain-containing protein OS=Gadus morhua OX=8049 PE=3 SV=1                                                        | 2  | 2 | 2 | 2 | 1845 | 201.4 | 6.98 | 5.18 | 2 | 1 |
| -8.356E+18 | IsMasterProtein | A0A8C5FE19 | Acyl-CoA dehydrogenase family, member 8 OS=Gadus morhua OX=8049 GN=acad8 PE=3 SV=1                                         | 12 | 2 | 2 | 2 | 482  | 52.4  | 6.4  | 5.18 | 2 | 1 |
| 1.0721E+17 | IsMasterProtein | A0A8C5BDK3 | Zinc finger protein 142 OS=Gadus morhua OX=8049 PE=4 SV=1                                                                  | 2  | 2 | 2 | 2 | 1531 | 175.1 | 8.72 | 5.18 | 2 | 1 |
| -3.171E+18 | IsMasterProtein | A0A8C5CL76 | Protein-tyrosine-phosphatase OS=Gadus morhua OX=8049 PE=3 SV=1                                                             | 4  | 2 | 2 | 2 | 1188 | 131.4 | 6.52 | 5.18 | 2 | 1 |
| -8.402E+18 | IsMasterProtein | A0A8C5CI57 | Inositol hexakisphosphate and diphosphoinositol-pentakisphosphate kinase OS=Gadus morhua OX=8049 GN=LOC115558596 PE=3 SV=1 | 3  | 2 | 2 | 2 | 1299 | 143.2 | 6.92 | 5.18 | 2 | 1 |
| 5.4267E+18 | IsMasterProtein | A0A8C5FHK6 | Tousled-like kinase 1a OS=Gadus morhua OX=8049 GN=tlk1a PE=4 SV=1                                                          | 8  | 2 | 2 | 2 | 722  | 82.2  | 8.19 | 5.18 | 2 | 1 |
| 5.3438E+18 | IsMasterProtein | A0A8C4ZX86 | Ankyrin 3a OS=Gadus morhua OX=8049 PE=4 SV=1                                                                               | 2  | 2 | 2 | 2 | 1671 | 182.5 | 7.8  | 5.18 | 2 | 1 |
| 7.9517E+18 | IsMasterProtein | A0A8C5FW7  | Dihydrouridine synthase 2 OS=Gadus morhua OX=8049 GN=dus2 PE=4 SV=1                                                        | 7  | 2 | 2 | 2 | 468  | 52.7  | 7.85 | 5.18 | 2 | 1 |
| -8.802E+17 | IsMasterProtein | A0A8C5AZM3 | Vacuolar protein sorting-associated protein 52 homolog OS=Gadus morhua OX=8049 PE=3 SV=1                                   | 4  | 2 | 2 | 2 | 689  | 79.4  | 6.42 | 5.17 | 2 | 1 |
| -7.705E+18 | IsMasterProtein | A0A8C5FPJ3 | alpha-1,2-Mannosidase OS=Gadus morhua OX=8049 GN=si:ch211-282j22.3 PE=3 SV=1                                               | 4  | 2 | 2 | 2 | 835  | 93.4  | 5.24 | 5.17 | 2 | 1 |
| -6.931E+18 | IsMasterProtein | A0A8C5FMK8 | Phosphatidylinositol-4-phosphate 3-kinase, catalytic subunit type 2 beta OS=Gadus morhua OX=8049 GN=pik3c2b PE=3 SV=1      | 3  | 2 | 2 | 2 | 1484 | 165.8 | 7.69 | 5.17 | 2 | 1 |
| -7.844E+18 | IsMasterProtein | A0A8C4Z527 | Chromosome 9 C12orf4 homolog OS=Gadus morhua OX=8049 GN=C12orf4 PE=4 SV=1                                                  | 6  | 2 | 2 | 2 | 551  | 62.8  | 6.3  | 5.16 | 2 | 1 |
| -8.619E+18 | IsMasterProtein | A0A8C5ASH7 | C2 domain-containing protein OS=Gadus morhua OX=8049 PE=4 SV=1                                                             | 7  | 2 | 2 | 2 | 480  | 54    | 9.57 | 5.16 | 2 | 1 |
| -8.946E+18 | IsMasterProtein | A0A8C5B2K3 | Aromatic-L-amino-acid decarboxylase-like OS=Gadus morhua OX=8049 GN=LOC115554234 PE=3 SV=1                                 | 7  | 2 | 2 | 2 | 456  | 51.4  | 5.81 | 5.16 | 2 | 1 |
| 6.0907E+18 | IsMasterProtein | A0A8C4YVE5 | N-acetylneuraminic acid synthase a OS=Gadus morhua OX=8049 GN=nansa PE=3 SV=1                                              | 9  | 2 | 2 | 2 | 359  | 39.9  | 7.09 | 5.16 | 2 | 1 |
| 8.6284E+18 | IsMasterProtein | A0A8C5FC86 | Synapse defective 1, Rho GTPase, homolog 2 (C. elegans) OS=Gadus morhua OX=8049 GN=SYDE2 PE=4 SV=1                         | 2  | 2 | 2 | 2 | 1860 | 204.4 | 6.32 | 5.16 | 2 | 1 |
| -1.476E+18 | IsMasterProtein | A0A8C5A1L6 | Autophagy related 2B OS=Gadus morhua OX=8049 GN=atg2b PE=3 SV=1                                                            | 2  | 2 | 2 | 2 | 1936 | 215.2 | 5.9  | 5.16 | 2 | 1 |
| -9.138E+18 | IsMasterProtein | A0A8C5AKF6 | Potassium voltage-gated channel, subfamily H (eag-related), member 4b OS=Gadus morhua OX=8049 GN=kcnh4b PE=4 SV=1          | 6  | 2 | 2 | 2 | 918  | 102   | 8.43 | 5.16 | 2 | 1 |
| 4.4374E+18 | IsMasterProtein | A0A8C5CXK4 | Uncharacterized protein OS=Gadus morhua OX=8049 PE=4 SV=1                                                                  | 5  | 2 | 2 | 2 | 952  | 106.5 | 6.64 | 5.16 | 2 | 1 |
| -6.93E+18  | IsMasterProtein | A0A8C5FQF4 | VGF nerve growth factor inducible OS=Gadus morhua OX=8049 PE=4 SV=1                                                        | 6  | 2 | 2 | 2 | 574  | 63.4  | 4.64 | 5.16 | 2 | 1 |
| -7.102E+18 | IsMasterProtein | A0A8C5BMK1 | Uncharacterized protein OS=Gadus morhua OX=8049 PE=4 SV=1                                                                  | 31 | 2 | 2 | 2 | 166  | 17.7  | 5.71 | 5.15 | 2 | 1 |
| -6.335E+18 | IsMasterProtein | A0A8C4YW0  | Conserved oligomeric Golgi complex subunit 3 OS=Gadus morhua OX=8049 GN=cog3 PE=3 SV=1                                     | 6  | 2 | 2 | 2 | 805  | 91.8  | 6.44 | 5.15 | 2 | 1 |

|                |                 |            |                                                                                                      |    |   |   |   |      |       |       |      |   |   |
|----------------|-----------------|------------|------------------------------------------------------------------------------------------------------|----|---|---|---|------|-------|-------|------|---|---|
| 4.1323E+17     | IsMasterProtein | A0A8C4ZP06 | CDK5 regulatory subunit associated protein 2 OS=Gadus morhua OX=8049 PE=4 SV=1                       | 2  | 2 | 2 | 2 | 1082 | 122.9 | 5.54  | 5.15 | 2 | 1 |
| -<br>5.757E+18 | IsMasterProtein | A0A8C5CM54 | Eukaryotic translation initiation factor 4H OS=Gadus morhua OX=8049 PE=4 SV=1                        | 8  | 2 | 2 | 2 | 233  | 25.5  | 8.62  | 5.15 | 2 | 1 |
| 7.6818E+18     | IsMasterProtein | A0A8C5FXQ9 | Small G protein signaling modulator 1a OS=Gadus morhua OX=8049 PE=4 SV=1                             | 3  | 2 | 2 | 2 | 971  | 109.5 | 6.93  | 5.15 | 2 | 1 |
| 6.8779E+18     | IsMasterProtein | A0A8C5AM88 | Receptor protein-tyrosine kinase OS=Gadus morhua OX=8049 PE=3 SV=1                                   | 5  | 2 | 2 | 2 | 730  | 81.7  | 7.91  | 5.15 | 2 | 1 |
| 7.9166E+18     | IsMasterProtein | A0A8C5F701 | ATP-binding cassette, sub-family C (CFTR/MRP), member 12 OS=Gadus morhua OX=8049 GN=abcc12 PE=4 SV=1 | 3  | 2 | 2 | 2 | 1345 | 149.4 | 6.51  | 5.15 | 2 | 1 |
| -<br>5.088E+18 | IsMasterProtein | A0A8C5FN17 | DNA (cytosine-5)-methyltransferase OS=Gadus morhua OX=8049 GN=dnmt1 PE=3 SV=1                        | 1  | 2 | 2 | 2 | 1487 | 167.1 | 6.44  | 5.15 | 2 | 1 |
| -<br>8.513E+18 | IsMasterProtein | A0A8C5BQY7 | Disks large-associated protein 1-like OS=Gadus morhua OX=8049 GN=LOC115549066 PE=3 SV=1              | 4  | 2 | 2 | 2 | 1151 | 127.1 | 7.09  | 5.15 | 2 | 1 |
| -<br>3.855E+18 | IsMasterProtein | A0A8C5AFJ2 | Reverse transcriptase domain-containing protein OS=Gadus morhua OX=8049 PE=4 SV=1                    | 2  | 2 | 2 | 2 | 1104 | 125.6 | 8.75  | 5.15 | 2 | 1 |
| 6.0663E+18     | IsMasterProtein | A0A8C5CW50 | Ribonuclease H OS=Gadus morhua OX=8049 PE=3 SV=1                                                     | 5  | 2 | 2 | 2 | 996  | 109   | 9.58  | 5.15 | 2 | 1 |
| -<br>6.041E+18 | IsMasterProtein | A0A8C4ZK93 | 60S ribosomal protein L14 OS=Gadus morhua OX=8049 GN=rpl14 PE=3 SV=1                                 | 17 | 2 | 2 | 2 | 137  | 16    | 10.35 | 5.15 | 2 | 1 |
| -<br>8.651E+18 | IsMasterProtein | A0A8C5BLK4 | Rho/rac guanine nucleotide exchange factor (GEF) 2 OS=Gadus morhua OX=8049 GN=arhgef2 PE=4 SV=1      | 5  | 2 | 2 | 2 | 921  | 103.6 | 7.81  | 5.15 | 2 | 1 |
| -<br>8.773E+18 | IsMasterProtein | A0A8C5C6J5 | F-actin monooxygenase OS=Gadus morhua OX=8049 GN=mical2a PE=3 SV=1                                   | 3  | 2 | 2 | 2 | 1102 | 123.5 | 8.56  | 5.15 | 2 | 1 |
| -<br>1.656E+18 | IsMasterProtein | A0A8C5ADS1 | Kelch-like family member 4 OS=Gadus morhua OX=8049 PE=4 SV=1                                         | 5  | 2 | 2 | 2 | 864  | 92.7  | 6.84  | 5.15 | 2 | 1 |
| -<br>1.893E+17 | IsMasterProtein | A0A8C5FLF2 | Far upstream element (FUSE) binding protein 1 OS=Gadus morhua OX=8049 PE=4 SV=1                      | 5  | 2 | 2 | 2 | 648  | 68.1  | 8.05  | 5.14 | 2 | 1 |
| -<br>6.794E+18 | IsMasterProtein | A0A8C4YZY5 | TRAF2 and NCK interacting kinase a OS=Gadus morhua OX=8049 PE=4 SV=1                                 | 4  | 2 | 2 | 2 | 1135 | 130.1 | 7.96  | 5.14 | 2 | 1 |
| -<br>8.47E+18  | IsMasterProtein | A0A8C5B1V8 | Janus kinase and microtubule interacting protein 2 OS=Gadus morhua OX=8049 GN=jakmip2 PE=3 SV=1      | 8  | 2 | 2 | 2 | 532  | 61.8  | 7.8   | 5.14 | 2 | 1 |
| -<br>8.464E+18 | IsMasterProtein | A0A8C5FLW4 | Autophagy related 2A OS=Gadus morhua OX=8049 GN=atg2a PE=3 SV=1                                      | 2  | 2 | 2 | 2 | 1719 | 189.4 | 6.2   | 5.14 | 2 | 1 |
| -<br>4.678E+18 | IsMasterProtein | A0A8C5FGK6 | Calcium channel, voltage-dependent, R type, alpha 1E subunit a OS=Gadus morhua OX=8049 PE=3 SV=1     | 2  | 2 | 2 | 2 | 2264 | 251.4 | 8.56  | 5.14 | 2 | 1 |
| -<br>7.23E+18  | IsMasterProtein | A0A8C5B5G0 | Protein transport protein sec16 OS=Gadus morhua OX=8049 GN=sec16a PE=3 SV=1                          | 1  | 2 | 2 | 2 | 2527 | 274.9 | 6.37  | 5.14 | 2 | 1 |
| 1.4309E+18     | IsMasterProtein | A0A8C5CLS0 | Si:dkey-260c8.8 OS=Gadus morhua OX=8049 PE=4 SV=1                                                    | 4  | 2 | 2 | 2 | 686  | 72.3  | 6.27  | 5.14 | 2 | 1 |
| 3.2178E+18     | IsMasterProtein | A0A8C5A0L1 | Kinesin-like protein OS=Gadus morhua OX=8049 PE=3 SV=1                                               | 4  | 2 | 2 | 2 | 906  | 103   | 6.43  | 5.14 | 2 | 1 |
| 2.8982E+18     | IsMasterProtein | A0A8C5B9H7 | Uncharacterized protein OS=Gadus morhua OX=8049 PE=3 SV=1                                            | 4  | 2 | 2 | 2 | 806  | 90    | 9.22  | 5.14 | 2 | 1 |

|                    |                     |                |                                                                                                                            |    |   |   |   |      |           |      |      |   |   |
|--------------------|---------------------|----------------|----------------------------------------------------------------------------------------------------------------------------|----|---|---|---|------|-----------|------|------|---|---|
| -<br>5.959E+1<br>7 | IsMasterProt<br>ein | A0A8C5B0J2     | Gamma-aminobutyric acid (GABA) B receptor, 1b OS=Gadus morhua<br>OX=8049 GN=gabbr1b PE=3 SV=1                              | 4  | 2 | 2 | 2 | 1055 | 117.<br>2 | 7.78 | 5.14 | 2 | 1 |
| -<br>7.588E+1<br>8 | IsMasterProt<br>ein | A0A8C5F8R<br>7 | N-alpha-acetyltransferase 50, NatE catalytic subunit OS=Gadus morhua<br>OX=8049 GN=naa50 PE=4 SV=1                         | 21 | 2 | 2 | 2 | 168  | 19.2      | 8.51 | 5.14 | 2 | 1 |
| -<br>5.569E+1<br>8 | IsMasterProt<br>ein | A0A8C5F6S0     | RBR-type E3 ubiquitin transferase OS=Gadus morhua OX=8049<br>GN=si:ch211-278j3.3 PE=4 SV=1                                 | 5  | 2 | 2 | 2 | 516  | 56.7      | 6.81 | 5.13 | 2 | 1 |
| -<br>8.418E+1<br>8 | IsMasterProt<br>ein | A0A8C5BC2<br>8 | 5'-3' exoribonuclease OS=Gadus morhua OX=8049 PE=3 SV=1                                                                    | 5  | 2 | 2 | 2 | 933  | 105.<br>3 | 6.52 | 5.13 | 2 | 1 |
| 4.3527E+<br>18     | IsMasterProt<br>ein | A0A8C4ZT7<br>4 | 3-hydroxyanthranilate 3,4-dioxygenase OS=Gadus morhua OX=8049<br>GN=HAAO PE=3 SV=1                                         | 10 | 2 | 2 | 2 | 287  | 33.2      | 5.06 | 5.13 | 2 | 1 |
| 1.4648E+<br>18     | IsMasterProt<br>ein | A0A8C4ZQA<br>3 | Interleukin enhancer binding factor 3b OS=Gadus morhua OX=8049<br>GN=iH3b PE=4 SV=1                                        | 7  | 2 | 2 | 2 | 829  | 88.4      | 9.09 | 5.13 | 2 | 1 |
| 1.3946E+<br>18     | IsMasterProt<br>ein | A0A8C5FMC<br>7 | Cathepsin X OS=Gadus morhua OX=8049 PE=3 SV=1                                                                              | 11 | 2 | 2 | 2 | 303  | 33.1      | 7.06 | 5.13 | 2 | 1 |
| 1.6096E+<br>18     | IsMasterProt<br>ein | A0A8C5FLJ8     | Ataxin 7-like 2b OS=Gadus morhua OX=8049 GN=atxn7l2b PE=4 SV=1                                                             | 8  | 2 | 2 | 2 | 704  | 76.1      | 9.01 | 5.13 | 2 | 1 |
| -<br>3.287E+1<br>8 | IsMasterProt<br>ein | A0A8C5A07<br>0 | Uncharacterized protein OS=Gadus morhua OX=8049 PE=4 SV=1                                                                  | 3  | 2 | 2 | 2 | 1614 | 180.<br>4 | 6.34 | 5.13 | 2 | 1 |
| 1.8136E+<br>18     | IsMasterProt<br>ein | A0A8C5C795     | Sodium channel protein OS=Gadus morhua OX=8049 PE=3 SV=1                                                                   | 3  | 2 | 2 | 2 | 1668 | 190.<br>7 | 5.74 | 5.13 | 2 | 1 |
| -<br>6.836E+1<br>8 | IsMasterProt<br>ein | A0A8C5CU1<br>1 | PNPLA domain-containing protein OS=Gadus morhua OX=8049 PE=4<br>SV=1                                                       | 4  | 2 | 2 | 2 | 802  | 88.6      | 9.61 | 5.12 | 2 | 1 |
| -<br>9.129E+1<br>8 | IsMasterProt<br>ein | A0A8C5CCP<br>0 | Gelsolin OS=Gadus morhua OX=8049 PE=4 SV=1                                                                                 | 4  | 2 | 2 | 2 | 747  | 82.8      | 5.33 | 5.12 | 2 | 1 |
| -<br>7.894E+1<br>8 | IsMasterProt<br>ein | A0A8C5BRY<br>4 | Solute carrier family 25 member 12 OS=Gadus morhua OX=8049<br>GN=slc25a12 PE=3 SV=1                                        | 5  | 2 | 2 | 2 | 660  | 72.6      | 8.28 | 5.12 | 2 | 1 |
| -<br>1.224E+1<br>8 | IsMasterProt<br>ein | A0A8C4ZKU<br>9 | A disintegrin and metalloproteinase with thrombospondin motifs 7-like<br>OS=Gadus morhua OX=8049 GN=LOC115558321 PE=4 SV=1 | 3  | 2 | 2 | 2 | 1532 | 169.<br>7 | 6.51 | 5.12 | 2 | 1 |
| -<br>2.598E+1<br>8 | IsMasterProt<br>ein | A0A8C5FV7<br>4 | SH3 and multiple ankyrin repeat domains protein 2-like OS=Gadus<br>morhua OX=8049 GN=LOC115551008 PE=3 SV=1                | 2  | 2 | 2 | 2 | 1874 | 202.<br>5 | 7.68 | 5.11 | 2 | 1 |
| -<br>8.061E+1<br>8 | IsMasterProt<br>ein | A0A8C5AUS<br>7 | Glutamate receptor, metabotropic 1b OS=Gadus morhua OX=8049<br>GN=grm1b PE=3 SV=1                                          | 3  | 2 | 2 | 2 | 1152 | 128.<br>4 | 5.73 | 5.11 | 2 | 1 |
| 3.9451E+<br>18     | IsMasterProt<br>ein | A0A8C4ZD<br>W3 | Kelch-like family member 43 OS=Gadus morhua OX=8049 GN=klh43<br>PE=4 SV=1                                                  | 5  | 2 | 2 | 2 | 698  | 76.4      | 8.03 | 5.11 | 2 | 1 |
| -<br>3.242E+1<br>8 | IsMasterProt<br>ein | A0A8C4YZZ<br>9 | Elongation of very long chain fatty acids protein 6 OS=Gadus morhua<br>OX=8049 GN=elovl6 PE=3 SV=1                         | 19 | 2 | 2 | 2 | 269  | 31.5      | 9.33 | 5.11 | 2 | 1 |
| -<br>2.852E+1<br>8 | IsMasterProt<br>ein | A0A8C5CRS<br>7 | Protocadherin-related 15a OS=Gadus morhua OX=8049 PE=4 SV=1                                                                | 2  | 2 | 2 | 2 | 1934 | 207.<br>8 | 4.67 | 5.11 | 2 | 1 |
| -<br>6.386E+1<br>8 | IsMasterProt<br>ein | A0A8C5FFE<br>6 | RING-type E3 ubiquitin transferase OS=Gadus morhua OX=8049 PE=4<br>SV=1                                                    | 6  | 2 | 2 | 2 | 764  | 86.4      | 7.58 | 5.11 | 2 | 1 |
| -<br>5.055E+1<br>8 | IsMasterProt<br>ein | A0A8C4YVB<br>7 | Glycerophosphodiester phosphodiesterase domain containing 5b<br>OS=Gadus morhua OX=8049 GN=gdpd5b PE=3 SV=1                | 6  | 2 | 2 | 2 | 574  | 63.6      | 9.03 | 5.1  | 2 | 1 |

|                |                 |            |                                                                                        |    |   |   |   |      |       |      |      |   |   |
|----------------|-----------------|------------|----------------------------------------------------------------------------------------|----|---|---|---|------|-------|------|------|---|---|
| -<br>5.257E+18 | IsMasterProtein | A0A8C5FUQ8 | Uncharacterized protein OS=Gadus morhua OX=8049 PE=3 SV=1                              | 4  | 2 | 2 | 2 | 1300 | 144.9 | 8.24 | 5.1  | 2 | 1 |
| -<br>7.332E+18 | IsMasterProtein | A0A8C4YY60 | Dynamin-1-like protein OS=Gadus morhua OX=8049 PE=3 SV=1                               | 4  | 2 | 2 | 2 | 656  | 72.7  | 6.42 | 5.1  | 2 | 1 |
| -<br>4.651E+18 | IsMasterProtein | A0A8C5C088 | Cell division cycle 27 OS=Gadus morhua OX=8049 GN=cde27 PE=4 SV=1                      | 5  | 2 | 2 | 2 | 779  | 86.5  | 7.23 | 5.1  | 2 | 1 |
| -<br>4.774E+18 | IsMasterProtein | A0A8C5FUU3 | Rap guanine nucleotide exchange factor (GEF) 3 OS=Gadus morhua OX=8049 PE=4 SV=1       | 4  | 2 | 2 | 2 | 770  | 87.1  | 8.09 | 5.1  | 2 | 1 |
| -<br>7.743E+18 | IsMasterProtein | A0A8C5CUI5 | Vascular endothelial growth factor receptor 3 OS=Gadus morhua OX=8049 PE=3 SV=1        | 3  | 2 | 2 | 2 | 1440 | 159.9 | 6.58 | 5.1  | 2 | 1 |
| -<br>9.102E+18 | IsMasterProtein | A0A8C4ZAM3 | Excision repair cross-complementation group 6-like 2 OS=Gadus morhua OX=8049 PE=4 SV=1 | 4  | 2 | 2 | 2 | 1098 | 121.3 | 9.07 | 5.1  | 2 | 1 |
| -<br>5.274E+18 | IsMasterProtein | A0A8C5AR61 | Uncharacterized protein OS=Gadus morhua OX=8049 PE=4 SV=1                              | 6  | 2 | 2 | 2 | 509  | 55.2  | 9.45 | 5.1  | 2 | 1 |
| -<br>3.827E+18 | IsMasterProtein | A0A8C4ZXH0 | CTP synthase OS=Gadus morhua OX=8049 GN=ctps1b PE=3 SV=1                               | 7  | 2 | 2 | 2 | 564  | 63.3  | 6.86 | 5.09 | 2 | 1 |
| 7.4974E+18     | IsMasterProtein | A0A8C5FG79 | Inositol 1,4,5-trisphosphate receptor OS=Gadus morhua OX=8049 GN=itpr2 PE=3 SV=1       | 2  | 2 | 2 | 2 | 2673 | 304.8 | 6.81 | 5.09 | 2 | 1 |
| 2.7805E+18     | IsMasterProtein | A0A8C4Z4D6 | Uncharacterized protein OS=Gadus morhua OX=8049 PE=4 SV=1                              | 5  | 2 | 2 | 2 | 743  | 81.7  | 7.09 | 5.09 | 2 | 1 |
| 6.8267E+18     | IsMasterProtein | A0A8C5FQW5 | Uncharacterized protein OS=Gadus morhua OX=8049 PE=4 SV=1                              | 18 | 2 | 2 | 2 | 269  | 29.7  | 7.12 | 5.09 | 2 | 1 |
| -<br>6.253E+18 | IsMasterProtein | A0A8C5CDW7 | Uncharacterized protein OS=Gadus morhua OX=8049 PE=3 SV=1                              | 11 | 2 | 2 | 2 | 383  | 43.6  | 9.23 | 5.09 | 2 | 1 |
| -<br>2.921E+18 | IsMasterProtein | A0A8C5AQ12 | AMP deaminase OS=Gadus morhua OX=8049 GN=ampd1 PE=3 SV=1                               | 3  | 2 | 2 | 2 | 733  | 84.5  | 8.44 | 5.09 | 2 | 1 |
| 1.4877E+17     | IsMasterProtein | A0A8C5BM0  | MFS domain-containing protein OS=Gadus morhua OX=8049 PE=4 SV=1                        | 9  | 2 | 2 | 2 | 473  | 51.9  | 8.13 | 5.08 | 2 | 1 |
| 3.9401E+18     | IsMasterProtein | A0A8C5ADN6 | Tuftelin-interacting protein 11 OS=Gadus morhua OX=8049 GN=tfip11 PE=3 SV=1            | 5  | 2 | 2 | 2 | 818  | 92.9  | 6.33 | 5.08 | 2 | 1 |
| 5.6793E+18     | IsMasterProtein | A0A8C5CUK0 | Exocyst complex component Sec8 OS=Gadus morhua OX=8049 PE=3 SV=1                       | 7  | 2 | 2 | 2 | 476  | 54    | 8.07 | 5.08 | 2 | 1 |
| -<br>4.609E+17 | IsMasterProtein | A0A8C5BGF1 | Reverse transcriptase domain-containing protein OS=Gadus morhua OX=8049 PE=4 SV=1      | 10 | 2 | 2 | 2 | 375  | 42.4  | 9.28 | 5.08 | 2 | 1 |
| 2.9724E+18     | IsMasterProtein | A0A8C5A0K6 | Semaphorin 7A OS=Gadus morhua OX=8049 PE=4 SV=1                                        | 9  | 2 | 2 | 2 | 382  | 43.8  | 5.88 | 5.08 | 2 | 1 |
| -<br>7.485E+18 | IsMasterProtein | A0A8C5F8Y0 | ATP synthase subunit O, mitochondrial OS=Gadus morhua OX=8049 PE=3 SV=1                | 11 | 2 | 2 | 2 | 185  | 20    | 9.57 | 5.08 | 2 | 1 |
| -<br>2.597E+18 | IsMasterProtein | A0A8C4Z7B4 | Coiled-coil domain containing 151 OS=Gadus morhua OX=8049 PE=4 SV=1                    | 6  | 2 | 2 | 2 | 647  | 74.1  | 6.95 | 5.07 | 2 | 1 |
| -<br>9.017E+17 | IsMasterProtein | A0A8C4Z1J3 | Ceramide kinase OS=Gadus morhua OX=8049 PE=4 SV=1                                      | 8  | 2 | 2 | 2 | 508  | 57.1  | 8.41 | 5.07 | 2 | 1 |

|            |                 |             |                                                                                                                                     |    |   |   |   |      |       |       |      |   |   |
|------------|-----------------|-------------|-------------------------------------------------------------------------------------------------------------------------------------|----|---|---|---|------|-------|-------|------|---|---|
| 2.9029E+16 | IsMasterProtein | A0A8C5BSE6  | StAR-related lipid transfer (START) domain containing 15 OS=Gadus morhua OX=8049 GN=stard15 PE=4 SV=1                               | 9  | 2 | 2 | 2 | 248  | 28.7  | 8.31  | 5.06 | 2 | 1 |
| 6.744E+18  | IsMasterProtein | A0A8C5BQB5  | Ubiquitin carboxyl-terminal hydrolase CYLD-like OS=Gadus morhua OX=8049 GN=si:cabz01101003.1 PE=4 SV=1                              | 5  | 2 | 2 | 2 | 995  | 108.8 | 7.96  | 5.06 | 2 | 1 |
| 3.013E+18  | IsMasterProtein | A0A8C5F7V8  | Peptidylprolyl isomerase OS=Gadus morhua OX=8049 GN=fkbp16 PE=4 SV=1                                                                | 6  | 2 | 2 | 2 | 476  | 53.6  | 5.36  | 5.06 | 2 | 1 |
| 6.962E+17  | IsMasterProtein | A0A8C5C437  | CCHC-type domain-containing protein OS=Gadus morhua OX=8049 PE=4 SV=1                                                               | 5  | 2 | 2 | 2 | 525  | 57.4  | 7.08  | 5.06 | 2 | 1 |
| 7.498E+18  | IsMasterProtein | A0A8C4ZPM4  | Collagenase 3 OS=Gadus morhua OX=8049 GN=mmp30 PE=3 SV=1                                                                            | 4  | 2 | 2 | 2 | 500  | 56.2  | 7.24  | 5.06 | 2 | 1 |
| 7.857E+18  | IsMasterProtein | A0A8C5FQS0  | Non-specific serine/threonine protein kinase OS=Gadus morhua OX=8049 GN=LOC115549230 PE=3 SV=1                                      | 8  | 2 | 2 | 2 | 439  | 49.1  | 8.31  | 5.06 | 2 | 1 |
| 8.4764E+18 | IsMasterProtein | cRAP_Q9NSB4 | Keratin, type II cuticular Hb2 OS=Homo sapiens GN=KRT82 PE=1 SV=3                                                                   | 6  | 2 | 2 | 2 | 513  | 56.6  | 6.74  | 5.06 | 2 | 1 |
| 4.465E+18  | IsMasterProtein | A0A8C5AFH3  | Tyrosine-protein kinase receptor OS=Gadus morhua OX=8049 PE=3 SV=1                                                                  | 2  | 2 | 2 | 2 | 1349 | 152.4 | 6.9   | 5.06 | 2 | 1 |
| 8.142E+18  | IsMasterProtein | A0A8C5D3P7  | Eukaryotic translation initiation factor 4 gamma 2-like OS=Gadus morhua OX=8049 GN=LOC115550580 PE=3 SV=1                           | 4  | 2 | 2 | 2 | 942  | 106   | 7.36  | 5.06 | 2 | 1 |
| 6.605E+17  | IsMasterProtein | A0A8C5CT21  | Proteasome activator subunit 4a OS=Gadus morhua OX=8049 GN=psme4a PE=3 SV=1                                                         | 2  | 2 | 2 | 2 | 1817 | 208.6 | 7.23  | 5.06 | 2 | 1 |
| 7.6279E+18 | IsMasterProtein | A0A8C5BU97  | Bromodomain PHD finger transcription factor OS=Gadus morhua OX=8049 GN=bptf PE=4 SV=1                                               | 1  | 2 | 2 | 2 | 3426 | 373.4 | 7.96  | 5.06 | 2 | 1 |
| 4.796E+18  | IsMasterProtein | A0A8C4ZK40  | Eukaryotic translation elongation factor 1 delta b (guanine nucleotide exchange protein) OS=Gadus morhua OX=8049 GN=EEF1D PE=3 SV=1 | 14 | 2 | 2 | 2 | 272  | 30    | 4.63  | 5.05 | 2 | 1 |
| 5.804E+18  | IsMasterProtein | A0A8C5AS50  | Phosphodiesterase OS=Gadus morhua OX=8049 GN=LOC115548241 PE=3 SV=1                                                                 | 5  | 2 | 2 | 2 | 815  | 90.4  | 5.1   | 5.04 | 2 | 1 |
| 4.591E+17  | IsMasterProtein | A0A8C5AB96  | Immunoglobulin superfamily, member 9Ba OS=Gadus morhua OX=8049 GN=IGSF9B PE=4 SV=1                                                  | 3  | 2 | 2 | 2 | 1445 | 158   | 7.11  | 5.04 | 2 | 1 |
| 7.636E+18  | IsMasterProtein | A0A8C4ZS87  | DnaJ homolog subfamily C member 11-like OS=Gadus morhua OX=8049 GN=LOC115556975 PE=4 SV=1                                           | 8  | 2 | 2 | 2 | 560  | 63.1  | 7.34  | 5.04 | 2 | 1 |
| 8.9586E+18 | IsMasterProtein | A0A8C4ZWG4  | Regulating synaptic membrane exocytosis 2 OS=Gadus morhua OX=8049 GN=RIMS2 PE=4 SV=1                                                | 3  | 2 | 2 | 2 | 1291 | 143.4 | 9.11  | 5.04 | 2 | 1 |
| 5.829E+18  | IsMasterProtein | A0A8C5A4F9  | Uncharacterized protein OS=Gadus morhua OX=8049 PE=4 SV=1                                                                           | 14 | 2 | 2 | 2 | 365  | 38.4  | 11.37 | 5.04 | 2 | 1 |
| 1.368E+18  | IsMasterProtein | A0A8C5B745  | GDP-mannose 4,6-dehydratase OS=Gadus morhua OX=8049 GN=gmds PE=3 SV=1                                                               | 7  | 2 | 2 | 2 | 370  | 41.9  | 7.59  | 5.04 | 2 | 1 |
| 3.0276E+18 | IsMasterProtein | A0A8C5C072  | Uncharacterized protein OS=Gadus morhua OX=8049 PE=4 SV=1                                                                           | 4  | 2 | 2 | 2 | 551  | 62.3  | 7.39  | 5.03 | 2 | 1 |
| 5.132E+18  | IsMasterProtein | A0A8C5B6V4  | Uncharacterized protein OS=Gadus morhua OX=8049 PE=4 SV=1                                                                           | 3  | 2 | 2 | 2 | 1075 | 113.6 | 8.9   | 5.03 | 2 | 1 |
| 5.373E+18  | IsMasterProtein | A0A8C5CR17  | ATP synthase subunit f, mitochondrial OS=Gadus morhua OX=8049 GN=si:dkey-21c1.4 PE=3 SV=1                                           | 6  | 2 | 2 | 2 | 580  | 62.5  | 10.08 | 5.03 | 2 | 1 |

|                |                 |            |                                                                                                           |    |   |   |   |      |       |      |      |   |   |
|----------------|-----------------|------------|-----------------------------------------------------------------------------------------------------------|----|---|---|---|------|-------|------|------|---|---|
| -<br>9.205E+18 | IsMasterProtein | A0A8C4Z4F5 | Homeodomain interacting protein kinase 1a OS=Gadus morhua OX=8049 GN=hpk1a PE=4 SV=1                      | 4  | 2 | 2 | 2 | 1122 | 119.6 | 8.6  | 5.03 | 2 | 1 |
| -<br>7.018E+18 | IsMasterProtein | A0A8C4Z383 | Coronin OS=Gadus morhua OX=8049 GN=coro1b PE=3 SV=1                                                       | 4  | 2 | 2 | 2 | 501  | 55    | 6.11 | 5.03 | 2 | 1 |
| -<br>4.72E+18  | IsMasterProtein | A0A8C5CYJ1 | Ubinuclein 2b OS=Gadus morhua OX=8049 GN=ubn2b PE=3 SV=1                                                  | 2  | 2 | 2 | 2 | 1206 | 126.5 | 9.74 | 5.02 | 2 | 1 |
| -<br>5.716E+18 | IsMasterProtein | A0A8C5D0N5 | SEC24 homolog C, COPII coat complex component OS=Gadus morhua OX=8049 GN=sec24c PE=3 SV=1                 | 2  | 2 | 2 | 2 | 1129 | 121.2 | 6.83 | 5.02 | 2 | 1 |
| 2.9638E+16     | IsMasterProtein | A0A8C5ACB3 | Immunoglobulin domain-containing protein OS=Gadus morhua OX=8049 GN=si:ch211-79k12.1 PE=4 SV=1            | 11 | 2 | 2 | 2 | 321  | 35.3  | 7.14 | 5.02 | 2 | 1 |
| 1.2301E+18     | IsMasterProtein | A0A8C4ZS12 | Dihydropyrimidinase like 5b OS=Gadus morhua OX=8049 PE=3 SV=1                                             | 9  | 2 | 2 | 2 | 497  | 54.2  | 6.57 | 5.02 | 2 | 1 |
| 4.9411E+17     | IsMasterProtein | A0A8C5B4C3 | Proprotein convertase subtilisin/kexin type 5b OS=Gadus morhua OX=8049 GN=psk5b PE=3 SV=1                 | 2  | 2 | 2 | 2 | 1868 | 207.3 | 6.4  | 5.02 | 2 | 1 |
| -<br>1.467E+18 | IsMasterProtein | A0A8C4ZLZ7 | Fibrillar collagen NC1 domain-containing protein OS=Gadus morhua OX=8049 PE=4 SV=1                        | 3  | 2 | 2 | 2 | 993  | 94.9  | 5.76 | 5.01 | 2 | 1 |
| -<br>9.16E+18  | IsMasterProtein | A0A8C4YYT6 | Nucleosome assembly protein 1-like 1 OS=Gadus morhua OX=8049 GN=nap11i PE=3 SV=1                          | 7  | 2 | 2 | 2 | 385  | 44.2  | 4.64 | 5.01 | 2 | 1 |
| 2.606E+18      | IsMasterProtein | A0A8C5CVL3 | Tonsoku-like protein OS=Gadus morhua OX=8049 GN=tonsl PE=3 SV=1                                           | 3  | 2 | 2 | 2 | 1356 | 147.4 | 6.2  | 5.01 | 2 | 1 |
| -<br>7.547E+18 | IsMasterProtein | A0A8C4ZHZ6 | Sperm associated antigen 16 OS=Gadus morhua OX=8049 GN=spag16 PE=4 SV=1                                   | 5  | 2 | 2 | 2 | 639  | 69.4  | 6.99 | 5.01 | 2 | 1 |
| -<br>5.55E+17  | IsMasterProtein | A0A8C5CUS7 | Ubiquitinyl hydrolase 1 OS=Gadus morhua OX=8049 GN=otud7a PE=4 SV=1                                       | 4  | 2 | 2 | 2 | 958  | 105.9 | 7.81 | 5.01 | 2 | 1 |
| 2.4721E+18     | IsMasterProtein | A0A8C5B379 | Homeobox protein HMX1-like OS=Gadus morhua OX=8049 GN=LOC115538876 PE=4 SV=1                              | 12 | 2 | 2 | 2 | 310  | 33.9  | 6.8  | 5.01 | 2 | 1 |
| -<br>3.459E+18 | IsMasterProtein | A0A8C4ZM6  | Uncharacterized protein OS=Gadus morhua OX=8049 PE=3 SV=1                                                 | 3  | 2 | 2 | 2 | 1064 | 119.4 | 8.25 | 5    | 2 | 1 |
| -<br>6.807E+18 | IsMasterProtein | A0A8C5A4G6 | Phosphodiesterase OS=Gadus morhua OX=8049 PE=3 SV=1                                                       | 6  | 2 | 2 | 2 | 778  | 87.1  | 6.4  | 5    | 2 | 1 |
| -<br>2.741E+18 | IsMasterProtein | A0A8C5BGZ3 | Ribonuclease H OS=Gadus morhua OX=8049 PE=3 SV=1                                                          | 3  | 2 | 2 | 2 | 1089 | 123.4 | 9.42 | 5    | 2 | 1 |
| 7.8206E+18     | IsMasterProtein | A0A8C5D0V5 | Non-specific serine/threonine protein kinase OS=Gadus morhua OX=8049 PE=3 SV=1                            | 2  | 2 | 2 | 2 | 1385 | 152.4 | 9.19 | 4.99 | 2 | 1 |
| 6.4459E+18     | IsMasterProtein | A0A8C4ZN21 | DNA cross-link repair 1C, PSO2 homolog (S. cerevisiae) OS=Gadus morhua OX=8049 GN=dcrlc1c PE=3 SV=1       | 6  | 2 | 2 | 2 | 705  | 77.7  | 5.26 | 4.99 | 2 | 1 |
| -<br>1.07E+18  | IsMasterProtein | A0A8C5FI18 | SET domain containing 1B, histone lysine methyltransferase a OS=Gadus morhua OX=8049 GN=setd1ba PE=4 SV=1 | 2  | 2 | 2 | 2 | 1858 | 203   | 5.6  | 4.99 | 2 | 1 |
| -<br>9.068E+18 | IsMasterProtein | A0A8C5C0Y0 | DDE_Tnp_1_7 domain-containing protein OS=Gadus morhua OX=8049 PE=4 SV=1                                   | 6  | 2 | 2 | 2 | 433  | 49.9  | 9.66 | 4.99 | 2 | 1 |
| -<br>7.012E+18 | IsMasterProtein | A0A8C4ZRI5 | Staphylococcal nuclease domain-containing protein OS=Gadus morhua OX=8049 PE=4 SV=1                       | 2  | 2 | 2 | 2 | 855  | 95.3  | 8.44 | 4.99 | 2 | 1 |
| -<br>1.757E+18 | IsMasterProtein | A0A8C5F8F9 | Microtubule-associated protein RP/EB family member 1 OS=Gadus morhua OX=8049 GN=MAPRE1 PE=3 SV=1          | 12 | 2 | 2 | 2 | 263  | 30.1  | 5.17 | 4.99 | 2 | 1 |
| 2.8828E+18     | IsMasterProtein | A0A8C5CQ37 | HIVEP zinc finger 3a OS=Gadus morhua OX=8049 GN=hivep3a PE=4 SV=1                                         | 3  | 2 | 2 | 2 | 1669 | 181.1 | 8.51 | 4.98 | 2 | 1 |

|                |                 |            |                                                                                                                                    |    |   |   |   |      |       |      |      |   |   |
|----------------|-----------------|------------|------------------------------------------------------------------------------------------------------------------------------------|----|---|---|---|------|-------|------|------|---|---|
| -<br>2.933E+18 | IsMasterProtein | A0A8C5BG93 | Proteasome 26S subunit, ATPase 6 OS=Gadus morhua OX=8049 GN=psmc6 PE=3 SV=1                                                        | 9  | 2 | 2 | 2 | 420  | 47.3  | 8.57 | 4.98 | 2 | 1 |
| -<br>7.227E+18 | IsMasterProtein | A0A8C5ATE1 | Receptor protein-tyrosine kinase OS=Gadus morhua OX=8049 PE=4 SV=1                                                                 | 3  | 2 | 2 | 2 | 1221 | 137.6 | 6.57 | 4.98 | 2 | 1 |
| -<br>8.848E+18 | IsMasterProtein | A0A8C4YUP5 | Uncharacterized protein OS=Gadus morhua OX=8049 PE=4 SV=1                                                                          | 3  | 2 | 2 | 2 | 1466 | 161.4 | 7.15 | 4.98 | 2 | 1 |
| 4.9185E+18     | IsMasterProtein | A0A8C5CFD6 | Voltage-dependent anion-selective channel protein 2 OS=Gadus morhua OX=8049 GN=VDAC2 PE=3 SV=1                                     | 9  | 2 | 2 | 2 | 289  | 31.2  | 8.81 | 4.98 | 2 | 1 |
| -<br>8.573E+18 | IsMasterProtein | A0A8C5BJJ2 | Dedicator of cytokinesis 11 OS=Gadus morhua OX=8049 PE=3 SV=1                                                                      | 2  | 2 | 2 | 2 | 1875 | 213.7 | 8.12 | 4.98 | 2 | 1 |
| 6.4369E+18     | IsMasterProtein | A0A8C5ANP5 | Synaptotagmin-like 2b OS=Gadus morhua OX=8049 GN=syt12b PE=4 SV=1                                                                  | 2  | 2 | 2 | 2 | 1601 | 179.3 | 9.39 | 4.98 | 2 | 1 |
| 4.5605E+18     | IsMasterProtein | A0A8C4YYH0 | NAD-capped RNA hydrolase NUDT12 OS=Gadus morhua OX=8049 PE=3 SV=1                                                                  | 9  | 2 | 2 | 2 | 445  | 49.3  | 6.25 | 4.98 | 2 | 1 |
| 6.9178E+18     | IsMasterProtein | A0A8C5BK51 | Sema domain, immunoglobulin domain (Ig), short basic domain, secreted, (semaphorin) 3D OS=Gadus morhua OX=8049 GN=sema3d PE=3 SV=1 | 4  | 2 | 2 | 2 | 698  | 79    | 8.51 | 4.97 | 2 | 1 |
| 4.6123E+18     | IsMasterProtein | A0A8C5FJW7 | Zgc:109949 OS=Gadus morhua OX=8049 PE=3 SV=1                                                                                       | 9  | 2 | 2 | 2 | 321  | 34.9  | 5.82 | 4.97 | 2 | 1 |
| -<br>5.415E+18 | IsMasterProtein | A0A8C4Z489 | SET domain bifurcated histone lysine methyltransferase 1b OS=Gadus morhua OX=8049 GN=setdb1b PE=4 SV=1                             | 3  | 2 | 2 | 2 | 1253 | 138.5 | 7.03 | 4.97 | 2 | 1 |
| -<br>8.02E+18  | IsMasterProtein | A0A8C4ZI19 | Synaptotagmin-1-like OS=Gadus morhua OX=8049 GN=LOC115531393 PE=4 SV=1                                                             | 7  | 2 | 2 | 2 | 430  | 48.9  | 7.83 | 4.97 | 2 | 1 |
| -<br>9.945E+17 | IsMasterProtein | A0A8C5A7B7 | PDZ domain-containing protein 4-like OS=Gadus morhua OX=8049 GN=LOC115550453 PE=4 SV=1                                             | 3  | 2 | 2 | 2 | 965  | 105.1 | 5.96 | 4.97 | 2 | 1 |
| -<br>4.384E+18 | IsMasterProtein | A0A8C5F592 | ISY1 splicing factor homolog OS=Gadus morhua OX=8049 GN=isy1 PE=3 SV=1                                                             | 9  | 2 | 2 | 2 | 282  | 32.4  | 5.15 | 4.97 | 2 | 1 |
| -<br>2.812E+17 | IsMasterProtein | A0A8C4ZXT7 | DnaJ homolog subfamily C member 2 OS=Gadus morhua OX=8049 GN=dnajc2 PE=4 SV=1                                                      | 5  | 2 | 2 | 2 | 596  | 68.8  | 8.4  | 4.96 | 2 | 1 |
| -<br>3.816E+18 | IsMasterProtein | A0A8C5C1T3 | Potassium voltage-gated channel subfamily B member 2 OS=Gadus morhua OX=8049 GN=KCNCB2 PE=4 SV=1                                   | 6  | 2 | 2 | 2 | 612  | 66.9  | 5.48 | 4.96 | 2 | 1 |
| 8.4192E+18     | IsMasterProtein | A0A8C5CD57 | Uncharacterized protein OS=Gadus morhua OX=8049 PE=4 SV=1                                                                          | 3  | 2 | 2 | 2 | 1096 | 122.3 | 9.41 | 4.96 | 2 | 1 |
| 2.7707E+18     | IsMasterProtein | A0A8C5BGT5 | Ribonuclease H OS=Gadus morhua OX=8049 PE=3 SV=1                                                                                   | 4  | 2 | 2 | 2 | 722  | 81.5  | 8.44 | 4.96 | 2 | 1 |
| -<br>7.15E+18  | IsMasterProtein | A0A8C5FHQ4 | Kinesin light chain OS=Gadus morhua OX=8049 PE=3 SV=1                                                                              | 6  | 2 | 2 | 2 | 567  | 63.4  | 6.2  | 4.96 | 2 | 1 |
| -<br>3.459E+18 | IsMasterProtein | A0A8C4ZGS9 | Phosphofurin acidic cluster sorting protein 1 OS=Gadus morhua OX=8049 GN=pacs1 PE=3 SV=1                                           | 4  | 2 | 2 | 2 | 907  | 99.8  | 8.05 | 4.96 | 2 | 1 |
| 5.0784E+18     | IsMasterProtein | A0A8C4YTE9 | Nodal homolog OS=Gadus morhua OX=8049 GN=LOC115541809 PE=3 SV=1                                                                    | 13 | 2 | 2 | 2 | 218  | 23.2  | 5.94 | 4.96 | 2 | 1 |
| 7.2305E+18     | IsMasterProtein | A0A8C4Z2M3 | Lecithin-cholesterol acyltransferase OS=Gadus morhua OX=8049 GN=lcacat PE=3 SV=1                                                   | 9  | 2 | 2 | 2 | 443  | 50.9  | 5.64 | 4.96 | 2 | 1 |
| -<br>5.328E+18 | IsMasterProtein | A0A8C5BD55 | Uncharacterized protein OS=Gadus morhua OX=8049 PE=4 SV=1                                                                          | 8  | 2 | 2 | 2 | 373  | 42.1  | 9.45 | 4.96 | 2 | 1 |



|                |                 |            |                                                                                                    |    |   |   |   |      |       |       |      |   |   |
|----------------|-----------------|------------|----------------------------------------------------------------------------------------------------|----|---|---|---|------|-------|-------|------|---|---|
| -<br>9.099E+18 | IsMasterProtein | A0A8C5A6F6 | S1 motif domain-containing protein OS=Gadus morhua OX=8049 PE=4 SV=1                               | 3  | 2 | 2 | 2 | 897  | 99.9  | 10.02 | 4.96 | 2 | 1 |
| 3.9535E+18     | IsMasterProtein | A0A8C5FCR8 | B-cell translocation gene 4 OS=Gadus morhua OX=8049 GN=LOC115547459 PE=4 SV=1                      | 6  | 2 | 2 | 2 | 609  | 69.2  | 8.92  | 4.96 | 2 | 1 |
| -<br>1.966E+18 | IsMasterProtein | A0A8C4ZC80 | Uncharacterized protein OS=Gadus morhua OX=8049 PE=3 SV=1                                          | 4  | 2 | 2 | 2 | 832  | 94.6  | 7.42  | 4.95 | 2 | 1 |
| -<br>5.843E+17 | IsMasterProtein | A0A8C5AXT9 | Myelin basic protein OS=Gadus morhua OX=8049 PE=3 SV=1                                             | 31 | 2 | 2 | 2 | 95   | 10.3  | 10.83 | 4.95 | 2 | 1 |
| -<br>3.784E+18 | IsMasterProtein | A0A8C5C763 | Excision repair cross-complementation group 5 OS=Gadus morhua OX=8049 GN=ercc5 PE=3 SV=1           | 4  | 2 | 2 | 2 | 1039 | 116   | 5.83  | 4.95 | 2 | 1 |
| 4.5203E+18     | IsMasterProtein | A0A8C5CRW7 | Formin-like 3 OS=Gadus morhua OX=8049 PE=3 SV=1                                                    | 3  | 2 | 2 | 2 | 1079 | 122.1 | 8.34  | 4.94 | 2 | 1 |
| -<br>8.428E+17 | IsMasterProtein | A0A8C5FH34 | Dynein, axonemal, heavy chain 7 OS=Gadus morhua OX=8049 GN=dnah7 PE=3 SV=1                         | 1  | 2 | 2 | 2 | 3109 | 351.5 | 5.95  | 4.94 | 2 | 1 |
| -<br>6.167E+18 | IsMasterProtein | A0A8C5BB21 | Uncharacterized LOC115545066 OS=Gadus morhua OX=8049 GN=zgc:162200 PE=3 SV=1                       | 3  | 2 | 2 | 2 | 898  | 99.7  | 5.34  | 4.94 | 2 | 1 |
| -<br>7.146E+18 | IsMasterProtein | A0A8C5BVE1 | Non-specific serine/threonine protein kinase OS=Gadus morhua OX=8049 PE=3 SV=1                     | 2  | 2 | 2 | 2 | 1674 | 189.2 | 6.46  | 4.94 | 2 | 1 |
| -<br>8.746E+18 | IsMasterProtein | A0A8C4Z9W2 | Non-specific serine/threonine protein kinase OS=Gadus morhua OX=8049 PE=3 SV=1                     | 4  | 3 | 3 | 3 | 703  | 77.2  | 9.66  | 4.94 | 3 | 1 |
| -<br>7.016E+18 | IsMasterProtein | A0A8C5FIQ0 | ST18 C2H2C-type zinc finger transcription factor OS=Gadus morhua OX=8049 GN=ST18 PE=3 SV=1         | 3  | 2 | 2 | 2 | 1143 | 126   | 5.77  | 4.93 | 2 | 1 |
| -7.3E+17       | IsMasterProtein | A0A8C4Z284 | Unk like zinc finger OS=Gadus morhua OX=8049 PE=3 SV=1                                             | 3  | 2 | 2 | 2 | 696  | 77.6  | 7.81  | 4.93 | 2 | 1 |
| -<br>6.038E+18 | IsMasterProtein | A0A8C5A497 | X-prolyl aminopeptidase (aminopeptidase P) 1, soluble OS=Gadus morhua OX=8049 GN=xpnpep1 PE=3 SV=1 | 2  | 2 | 2 | 2 | 629  | 70.3  | 6.39  | 4.92 | 2 | 1 |
| 7.3101E+17     | IsMasterProtein | A0A8C5CHJ2 | Phosphatidylinositol-4,5-bisphosphate 3-kinase OS=Gadus morhua OX=8049 GN=PIK3CB PE=3 SV=1         | 3  | 2 | 2 | 2 | 1064 | 120.9 | 7.4   | 4.92 | 2 | 1 |
| 1.7778E+18     | IsMasterProtein | A0A8C4ZN45 | CCHC-type zinc finger, nucleic acid binding protein a OS=Gadus morhua OX=8049 PE=4 SV=1            | 13 | 2 | 2 | 2 | 151  | 16.5  | 7.37  | 4.92 | 2 | 1 |
| -<br>6.528E+18 | IsMasterProtein | A0A8C5B6E6 | Ribonuclease H OS=Gadus morhua OX=8049 PE=3 SV=1                                                   | 3  | 2 | 2 | 2 | 1309 | 147.8 | 8.13  | 4.92 | 2 | 1 |
| -<br>7.975E+18 | IsMasterProtein | A0A8C5FWA2 | PDS5 cohesin associated factor A OS=Gadus morhua OX=8049 GN=pds5a PE=4 SV=1                        | 2  | 2 | 2 | 2 | 1257 | 142.3 | 7.64  | 4.91 | 2 | 1 |
| -<br>2.099E+18 | IsMasterProtein | A0A8C4ZT81 | Protein kinase C OS=Gadus morhua OX=8049 GN=LOC115559907 PE=3 SV=1                                 | 4  | 2 | 2 | 2 | 765  | 86.2  | 7.12  | 4.91 | 2 | 1 |
| -<br>4.093E+18 | IsMasterProtein | A0A8C5AYJ9 | ATPase H+ transporting V1 subunit E1a OS=Gadus morhua OX=8049 GN=atp6v1e1a PE=3 SV=1               | 9  | 2 | 2 | 2 | 226  | 26.1  | 6.15  | 4.91 | 2 | 1 |
| -<br>4.81E+18  | IsMasterProtein | A0A8C5CQB0 | Proline rich 14 OS=Gadus morhua OX=8049 GN=pr14 PE=4 SV=1                                          | 3  | 2 | 2 | 2 | 1340 | 144.8 | 8.95  | 4.91 | 2 | 1 |
| -<br>2.508E+18 | IsMasterProtein | A0A8C5BS17 | EMAP like 4 OS=Gadus morhua OX=8049 GN=EML4 PE=3 SV=1                                              | 3  | 2 | 2 | 2 | 1007 | 110.5 | 6.68  | 4.91 | 2 | 1 |

|                |                 |            |                                                                                                                   |    |   |   |   |      |       |       |      |   |   |
|----------------|-----------------|------------|-------------------------------------------------------------------------------------------------------------------|----|---|---|---|------|-------|-------|------|---|---|
| -<br>2.954E+18 | IsMasterProtein | A0A8C4Z7E1 | Phosphoacetylglucosamine mutase OS=Gadus morhua OX=8049 PE=3 SV=1                                                 | 7  | 2 | 2 | 2 | 548  | 59.9  | 6.18  | 4.9  | 2 | 1 |
| -<br>6.57E+18  | IsMasterProtein | A0A8C5ATZ0 | Phospholipid-transporting ATPase OS=Gadus morhua OX=8049 GN=LOC115545885 PE=3 SV=1                                | 3  | 2 | 2 | 2 | 1210 | 137   | 7.08  | 4.9  | 2 | 1 |
| -<br>5.38E+18  | IsMasterProtein | A0A8C5CIM4 | Alanine--tRNA ligase OS=Gadus morhua OX=8049 GN=aars2 PE=3 SV=1                                                   | 4  | 2 | 2 | 2 | 887  | 97.3  | 6.55  | 4.9  | 2 | 1 |
| -<br>7.841E+18 | IsMasterProtein | A0A8C5AEQ8 | Rho-associated protein kinase OS=Gadus morhua OX=8049 GN=ROCK2 PE=3 SV=1                                          | 2  | 2 | 2 | 2 | 1378 | 159.1 | 6.23  | 4.9  | 2 | 1 |
| -<br>9.102E+18 | IsMasterProtein | A0A8C5BRY1 | Uncharacterized protein OS=Gadus morhua OX=8049 PE=4 SV=1                                                         | 4  | 2 | 2 | 2 | 1192 | 130.4 | 6.86  | 4.9  | 2 | 1 |
| -<br>8.573E+18 | IsMasterProtein | A0A8C5C8Y1 | Uncharacterized protein OS=Gadus morhua OX=8049 PE=4 SV=1                                                         | 2  | 2 | 2 | 2 | 1230 | 137.8 | 7.27  | 4.9  | 2 | 1 |
| -<br>7.486E+18 | IsMasterProtein | A0A8C4Z602 | Follistatin a OS=Gadus morhua OX=8049 GN=FST PE=4 SV=1                                                            | 5  | 2 | 2 | 2 | 323  | 35.7  | 8.03  | 4.9  | 2 | 1 |
| -<br>3.091E+18 | IsMasterProtein | A0A8C5BH54 | AT rich interactive domain 1Aa (SWI-like) OS=Gadus morhua OX=8049 GN=arid1aa PE=4 SV=1                            | 2  | 2 | 2 | 2 | 2200 | 232.8 | 6.43  | 4.9  | 2 | 1 |
| -<br>3.213E+17 | IsMasterProtein | A0A8C4ZXG5 | Proteasome subunit alpha type OS=Gadus morhua OX=8049 GN=psma4 PE=3 SV=1                                          | 7  | 2 | 2 | 2 | 261  | 29.3  | 7.66  | 4.9  | 2 | 1 |
| -<br>7.332E+18 | IsMasterProtein | A0A8C4Z1T1 | tRNA pseudouridine(55) synthase OS=Gadus morhua OX=8049 PE=3 SV=1                                                 | 6  | 2 | 2 | 2 | 544  | 61.8  | 7.8   | 4.9  | 2 | 1 |
| 4.6709E+18     | IsMasterProtein | A0A8C5C4K1 | ATP-binding cassette, sub-family B (MDR/TAP), member 10 OS=Gadus morhua OX=8049 GN=abcb10 PE=4 SV=1               | 3  | 2 | 2 | 2 | 727  | 79.1  | 9.1   | 4.89 | 2 | 1 |
| 4.5056E+18     | IsMasterProtein | A0A8C5FKT8 | Branchpoint-bridging protein OS=Gadus morhua OX=8049 GN=sf1 PE=3 SV=1                                             | 4  | 2 | 2 | 2 | 729  | 76.5  | 9.01  | 4.89 | 2 | 1 |
| -<br>3.864E+18 | IsMasterProtein | A0A8C5F9D2 | Gliomedin OS=Gadus morhua OX=8049 PE=4 SV=1                                                                       | 10 | 2 | 2 | 2 | 386  | 41.7  | 8.65  | 4.89 | 2 | 1 |
| -<br>4.839E+18 | IsMasterProtein | A0A8C5FW92 | Mast/stem cell growth factor receptor Kit OS=Gadus morhua OX=8049 PE=3 SV=1                                       | 5  | 2 | 2 | 2 | 921  | 103.3 | 7.84  | 4.89 | 2 | 1 |
| -<br>8.057E+18 | IsMasterProtein | A0A8C5BLR5 | Dachsous cadherin-related 1 OS=Gadus morhua OX=8049 GN=dchs1 PE=4 SV=1                                            | 1  | 2 | 2 | 2 | 2538 | 271.7 | 5     | 4.89 | 2 | 1 |
| -<br>3.122E+17 | IsMasterProtein | A0A8C4ZMS4 | Nucleoside-diphosphate kinase OS=Gadus morhua OX=8049 PE=4 SV=1                                                   | 6  | 2 | 2 | 2 | 690  | 77.9  | 5.29  | 4.89 | 2 | 1 |
| 4.3363E+18     | IsMasterProtein | A0A8C5F8L1 | 60S ribosomal protein L28 OS=Gadus morhua OX=8049 GN=rp128 PE=3 SV=1                                              | 14 | 2 | 2 | 2 | 137  | 15.5  | 11.91 | 4.89 | 2 | 1 |
| 7.4745E+18     | IsMasterProtein | A0A8C5BJ83 | Retinoic acid induced 1 OS=Gadus morhua OX=8049 PE=4 SV=1                                                         | 2  | 2 | 2 | 2 | 2138 | 233.9 | 7.69  | 4.89 | 2 | 1 |
| 6.7575E+18     | IsMasterProtein | A0A8C5FAT3 | Neuronal tyrosine-phosphorylated phosphoinositide-3-kinase adaptor 2b OS=Gadus morhua OX=8049 GN=nyap2b PE=4 SV=1 | 3  | 2 | 2 | 2 | 1080 | 118.7 | 8.72  | 4.89 | 2 | 1 |
| -<br>7.03E+18  | IsMasterProtein | A0A8C5A569 | Transcription factor-like 5 protein OS=Gadus morhua OX=8049 GN=LOC115545896 PE=4 SV=1                             | 1  | 2 | 2 | 2 | 3350 | 358.5 | 8.91  | 4.89 | 2 | 1 |
| -<br>6.518E+17 | IsMasterProtein | A0A8C5AWJ0 | Oxysterol binding protein-like 10b OS=Gadus morhua OX=8049 PE=4 SV=1                                              | 4  | 2 | 2 | 2 | 711  | 78.4  | 8.9   | 4.88 | 2 | 1 |

|                |                     |                |                                                                                                             |   |   |   |   |      |           |      |      |   |   |
|----------------|---------------------|----------------|-------------------------------------------------------------------------------------------------------------|---|---|---|---|------|-----------|------|------|---|---|
| -<br>8.377E+18 | IsMasterProt<br>ein | A0A8C4ZW7<br>4 | Rho guanine nucleotide exchange factor (GEF) 12a OS=Gadus morhua<br>OX=8049 GN=arhgef12a PE=4 SV=1          | 3 | 2 | 2 | 2 | 1000 | 113.<br>1 | 8.07 | 4.88 | 2 | 1 |
| -<br>8.367E+18 | IsMasterProt<br>ein | A0A8C4ZAB<br>0 | Sulfotransferase OS=Gadus morhua OX=8049 GN=HS3ST2 PE=3 SV=1                                                | 9 | 2 | 2 | 2 | 287  | 33.2      | 9.73 | 4.88 | 2 | 1 |
| -<br>8.02E+18  | IsMasterProt<br>ein | A0A8C5F733     | Non-specific serine/threonine protein kinase OS=Gadus morhua OX=8049<br>GN=trioa PE=3 SV=1                  | 1 | 2 | 2 | 2 | 3061 | 342.<br>1 | 6.39 | 4.88 | 2 | 1 |
| -<br>4.645E+18 | IsMasterProt<br>ein | A0A8C5C3M<br>2 | Short transient receptor potential channel 2-like OS=Gadus morhua<br>OX=8049 GN=LOC115547551 PE=4 SV=1      | 3 | 2 | 2 | 2 | 1061 | 118.<br>2 | 5.77 | 4.88 | 2 | 1 |
| -<br>4.542E+18 | IsMasterProt<br>ein | A0A8C5FGU<br>6 | [Histone H3]-trimethyl-L-lysine(4) demethylase OS=Gadus morhua<br>OX=8049 GN=kdm5ba PE=3 SV=1               | 2 | 2 | 2 | 2 | 1408 | 158.<br>1 | 6    | 4.88 | 2 | 1 |
| -<br>8.314E+18 | IsMasterProt<br>ein | A0A8C5FF49     | Plexin A1 OS=Gadus morhua OX=8049 GN=plxna1 PE=3 SV=1                                                       | 2 | 2 | 2 | 2 | 1893 | 211.<br>5 | 7.11 | 4.88 | 2 | 1 |
| -<br>5.492E+18 | IsMasterProt<br>ein | A0A8C4YZN<br>6 | Asparaginase OS=Gadus morhua OX=8049 PE=4 SV=1                                                              | 3 | 2 | 2 | 2 | 618  | 68.1      | 7.33 | 4.88 | 2 | 1 |
| -<br>4.404E+18 | IsMasterProt<br>ein | A0A8C4ZIT0     | Fructose-bisphosphate aldolase OS=Gadus morhua OX=8049 GN=aldob<br>PE=3 SV=1                                | 6 | 2 | 2 | 2 | 366  | 39.6      | 8.06 | 4.88 | 2 | 1 |
| -<br>4.477E+18 | IsMasterProt<br>ein | A0A8C5CVK<br>0 | Dihydropyrimidinase like 3 OS=Gadus morhua OX=8049 GN=dpysl3<br>PE=3 SV=1                                   | 3 | 2 | 2 | 2 | 614  | 66.8      | 6.49 | 4.87 | 2 | 1 |
| -<br>2.472E+18 | IsMasterProt<br>ein | A0A8C5AM<br>L0 | Eukaryotic translation initiation factor 3 subunit I OS=Gadus morhua<br>OX=8049 GN=eif3i PE=3 SV=1          | 7 | 2 | 2 | 2 | 321  | 35.8      | 5.33 | 4.87 | 2 | 1 |
| -<br>2.248E+18 | IsMasterProt<br>ein | A0A8C5FM4<br>6 | Reverse transcriptase domain-containing protein OS=Gadus morhua<br>OX=8049 PE=4 SV=1                        | 4 | 2 | 2 | 2 | 961  | 108.<br>8 | 9.01 | 4.86 | 2 | 1 |
| -<br>6.159E+18 | IsMasterProt<br>ein | A0A8C5AW<br>S4 | Myosin XIX OS=Gadus morhua OX=8049 GN=myo19 PE=3 SV=1                                                       | 3 | 2 | 2 | 2 | 1018 | 113.<br>3 | 8.46 | 4.86 | 2 | 1 |
| -<br>2.600E+18 | IsMasterProt<br>ein | A0A8C5FIW<br>7 | Cytoskeleton associated protein 4 OS=Gadus morhua OX=8049 PE=4<br>SV=1                                      | 5 | 2 | 2 | 2 | 434  | 44.9      | 4.7  | 4.86 | 2 | 1 |
| -<br>4.565E+18 | IsMasterProt<br>ein | A0A8C4YZ0<br>6 | Eukaryotic translation initiation factor 2 subunit 1 OS=Gadus morhua<br>OX=8049 GN=eif2s1b PE=3 SV=1        | 6 | 2 | 2 | 2 | 315  | 36        | 5.03 | 4.86 | 2 | 1 |
| -<br>6.248E+18 | IsMasterProt<br>ein | A0A8C5BQP<br>5 | Unc-13 homolog D (C. elegans) OS=Gadus morhua OX=8049<br>GN=unc13d PE=4 SV=1                                | 3 | 2 | 2 | 2 | 1073 | 123       | 6.02 | 4.86 | 2 | 1 |
| -<br>2.38E+18  | IsMasterProt<br>ein | A0A8C4YY5<br>6 | FA complementation group M OS=Gadus morhua OX=8049 GN=fancm<br>PE=3 SV=1                                    | 1 | 2 | 2 | 2 | 2288 | 252.<br>5 | 6.01 | 4.86 | 2 | 1 |
| -<br>8.972E+18 | IsMasterProt<br>ein | A0A8C5A1A<br>4 | Cadherin, EGF LAG seven-pass G-type receptor 3 OS=Gadus morhua<br>OX=8049 PE=3 SV=1                         | 1 | 2 | 2 | 2 | 2711 | 297.<br>4 | 6.35 | 4.86 | 2 | 1 |
| -<br>6.176E+18 | IsMasterProt<br>ein | A0A8C5A0B<br>9 | C2 calcium-dependent domain-containing protein 4C-like OS=Gadus<br>morhua OX=8049 GN=LOC115549445 PE=4 SV=1 | 7 | 2 | 2 | 2 | 483  | 52.3      | 9.61 | 4.86 | 2 | 1 |
| -<br>8.132E+18 | IsMasterProt<br>ein | A0A8C5BRA<br>2 | Nucleolar complex protein 3 homolog OS=Gadus morhua OX=8049<br>GN=noc3l PE=3 SV=1                           | 3 | 2 | 2 | 2 | 795  | 91.3      | 9.28 | 4.86 | 2 | 1 |
| -<br>1.218E+18 | IsMasterProt<br>ein | A0A8C4ZV2<br>9 | Ribonuclease H OS=Gadus morhua OX=8049 PE=3 SV=1                                                            | 3 | 2 | 2 | 2 | 1366 | 156.<br>7 | 7.87 | 4.86 | 2 | 1 |
| -<br>7.024E+18 | IsMasterProt<br>ein | A0A8C5BH0<br>6 | CTTNBP2 N-terminal-like protein OS=Gadus morhua OX=8049<br>GN=LOC115551856 PE=4 SV=1                        | 6 | 2 | 2 | 2 | 617  | 65.7      | 6.33 | 4.85 | 2 | 1 |
| -<br>8.576E+18 | IsMasterProt<br>ein | A0A8C5FXK<br>3 | Gse1 coiled-coil protein OS=Gadus morhua OX=8049 GN=gse1 PE=4<br>SV=1                                       | 3 | 2 | 2 | 2 | 1243 | 137.<br>7 | 7.84 | 4.85 | 2 | 1 |

|                 |                 |            |                                                                                                                                      |    |   |   |   |      |       |      |      |   |   |
|-----------------|-----------------|------------|--------------------------------------------------------------------------------------------------------------------------------------|----|---|---|---|------|-------|------|------|---|---|
| -<br>7.581E+18  | IsMasterProtein | A0A8C5AP00 | Uncharacterized protein OS=Gadus morhua OX=8049 PE=4 SV=1                                                                            | 8  | 2 | 2 | 2 | 575  | 65.4  | 9.1  | 4.85 | 2 | 1 |
| -<br>4.525E+18  | IsMasterProtein | A0A8C4Z1V6 | Aerolysin-like protein OS=Gadus morhua OX=8049 GN=LOC115541041 PE=3 SV=1                                                             | 7  | 2 | 2 | 2 | 319  | 34.2  | 6.57 | 4.85 | 2 | 1 |
| -<br>6.041E+18  | IsMasterProtein | A0A8C4ZH41 | Secreted frizzled-related protein 3 OS=Gadus morhua OX=8049 PE=3 SV=1                                                                | 11 | 2 | 2 | 2 | 294  | 32.8  | 8.31 | 4.85 | 2 | 1 |
| -<br>1.191E+18  | IsMasterProtein | A0A8C5AIS8 | Cyclic nucleotide-binding domain-containing protein OS=Gadus morhua OX=8049 PE=4 SV=1                                                | 7  | 2 | 2 | 2 | 695  | 80.3  | 9.16 | 4.85 | 2 | 1 |
| -<br>6.856E+18  | IsMasterProtein | A0A8C5ACW1 | Spartin a OS=Gadus morhua OX=8049 GN=sparta PE=4 SV=1                                                                                | 4  | 2 | 2 | 2 | 546  | 58.8  | 6.73 | 4.85 | 2 | 1 |
| -<br>1.042E+17  | IsMasterProtein | A0A8C4ZQX2 | Coiled-coil domain containing 6 OS=Gadus morhua OX=8049 GN=CCDC6 PE=4 SV=1                                                           | 5  | 2 | 2 | 2 | 530  | 59.6  | 8.65 | 4.85 | 2 | 1 |
| -<br>2.72E+18   | IsMasterProtein | A0A8C4YYI8 | SWI/SNF related, matrix associated, actin dependent regulator of chromatin, subfamily a, member 4a OS=Gadus morhua OX=8049 PE=3 SV=1 | 2  | 2 | 2 | 2 | 1652 | 184   | 7.87 | 4.85 | 2 | 1 |
| -<br>7.724E+18  | IsMasterProtein | A0A8C5ANI8 | Uncharacterized protein OS=Gadus morhua OX=8049 PE=4 SV=1                                                                            | 2  | 2 | 2 | 2 | 1282 | 146.7 | 5.66 | 4.85 | 2 | 1 |
| -<br>6.8435E+18 | IsMasterProtein | A0A8C5BZQ8 | Zinc finger protein 526 OS=Gadus morhua OX=8049 GN=znf526 PE=4 SV=1                                                                  | 3  | 2 | 2 | 2 | 1120 | 122.7 | 6.57 | 4.84 | 2 | 1 |
| -<br>4.7399E+18 | IsMasterProtein | A0A8C5AWN5 | Keratin, type I cytoskeletal 18-like OS=Gadus morhua OX=8049 GN=LOC115539996 PE=4 SV=1                                               | 7  | 2 | 2 | 2 | 427  | 48.3  | 6.29 | 4.84 | 2 | 1 |
| -<br>7.775E+18  | IsMasterProtein | A0A8C4Z574 | Chaperonin containing TCP1, subunit 6A (zeta 1) OS=Gadus morhua OX=8049 GN=cct6a PE=3 SV=1                                           | 4  | 2 | 2 | 2 | 531  | 57.6  | 7.15 | 4.84 | 2 | 1 |
| -<br>6.6727E+18 | IsMasterProtein | A0A8C4Z4T8 | Integrin beta OS=Gadus morhua OX=8049 PE=3 SV=1                                                                                      | 1  | 2 | 2 | 2 | 1826 | 200.1 | 5.73 | 4.84 | 2 | 1 |
| -<br>7.537E+18  | IsMasterProtein | A0A8C5FTJ0 | Phosphatidylinositol transfer protein membrane associated 2 OS=Gadus morhua OX=8049 GN=PITPNM2 PE=3 SV=1                             | 3  | 2 | 2 | 2 | 1208 | 133.1 | 7.21 | 4.84 | 2 | 1 |
| -<br>2.328E+18  | IsMasterProtein | A0A8C5FX66 | DDHD domain-containing protein OS=Gadus morhua OX=8049 PE=3 SV=1                                                                     | 3  | 2 | 2 | 2 | 974  | 106.9 | 9.23 | 4.84 | 2 | 1 |
| -<br>8.485E+18  | IsMasterProtein | A0A8C5FUC1 | DNA ligase OS=Gadus morhua OX=8049 GN=lig1 PE=3 SV=1                                                                                 | 3  | 2 | 2 | 2 | 958  | 107.5 | 6.32 | 4.84 | 2 | 1 |
| -<br>4.06E+17   | IsMasterProtein | A0A8C5BTC8 | Caspase-8-like OS=Gadus morhua OX=8049 GN=LOC115533582 PE=3 SV=1                                                                     | 11 | 2 | 2 | 2 | 295  | 32.2  | 6.87 | 4.84 | 2 | 1 |
| -<br>1.8781E+17 | IsMasterProtein | A0A8C5F5Y1 | Segment polarity protein dishevelled homolog DVL-3-like OS=Gadus morhua OX=8049 GN=LOC115549663 PE=3 SV=1                            | 2  | 2 | 2 | 2 | 695  | 75.4  | 6.86 | 4.84 | 2 | 1 |
| -<br>4.228E+18  | IsMasterProtein | A0A8C5CKD0 | Uncharacterized protein OS=Gadus morhua OX=8049 PE=4 SV=1                                                                            | 1  | 2 | 2 | 2 | 4732 | 542   | 5.21 | 4.83 | 2 | 1 |
| -<br>2.9056E+18 | IsMasterProtein | A0A8C5FKT5 | BR serine/threonine kinase 2b OS=Gadus morhua OX=8049 PE=4 SV=1                                                                      | 5  | 2 | 2 | 2 | 698  | 77.7  | 9.54 | 4.83 | 2 | 1 |
| -<br>3.344E+18  | IsMasterProtein | A0A8C5B7N5 | PYD and CARD domain containing OS=Gadus morhua OX=8049 PE=4 SV=1                                                                     | 9  | 2 | 2 | 2 | 202  | 22.3  | 7.5  | 4.83 | 2 | 1 |
| -<br>4.194E+18  | IsMasterProtein | A0A8C4Z906 | Short stature homeobox 2 OS=Gadus morhua OX=8049 GN=shox2 PE=4 SV=1                                                                  | 9  | 2 | 2 | 2 | 299  | 33.5  | 8.95 | 4.83 | 2 | 1 |

|                |                 |            |                                                                                               |    |   |   |   |      |       |       |      |   |   |
|----------------|-----------------|------------|-----------------------------------------------------------------------------------------------|----|---|---|---|------|-------|-------|------|---|---|
| -<br>2.563E+18 | IsMasterProtein | A0A8C5A2U4 | Doublecortin-like kinase 1a OS=Gadus morhua OX=8049 PE=3 SV=1                                 | 5  | 2 | 2 | 2 | 482  | 53.9  | 7.24  | 4.83 | 2 | 1 |
| 4.3335E+18     | IsMasterProtein | A0A8C5AF95 | Kinase OS=Gadus morhua OX=8049 GN=itpkb PE=3 SV=1                                             | 4  | 2 | 2 | 2 | 834  | 91.8  | 6.44  | 4.82 | 2 | 1 |
| -<br>8.271E+18 | IsMasterProtein | A0A8C4ZFC1 | Rac GTPase-activating protein 1-like OS=Gadus morhua OX=8049 GN=si:ch1073-416j23.1 PE=4 SV=1  | 7  | 2 | 2 | 2 | 679  | 76.5  | 8.84  | 4.82 | 2 | 1 |
| 2.0515E+18     | IsMasterProtein | A0A8C5F8H3 | CID domain-containing protein OS=Gadus morhua OX=8049 PE=4 SV=1                               | 11 | 2 | 2 | 2 | 328  | 36.8  | 6.74  | 4.81 | 2 | 1 |
| 6.2417E+17     | IsMasterProtein | A0A8C5AMN5 | DDE Tnp4 domain-containing protein OS=Gadus morhua OX=8049 PE=3 SV=1                          | 9  | 2 | 2 | 2 | 312  | 35.2  | 9.41  | 4.81 | 2 | 1 |
| -<br>8.068E+18 | IsMasterProtein | A0A8C5FAI2 | Phospholipase OS=Gadus morhua OX=8049 PE=3 SV=1                                               | 4  | 2 | 2 | 2 | 955  | 109.5 | 8.85  | 4.81 | 2 | 1 |
| 4.9693E+18     | IsMasterProtein | A0A8C5BHE7 | S100 calcium binding protein A10b OS=Gadus morhua OX=8049 GN=s100a10b PE=4 SV=1               | 15 | 2 | 2 | 2 | 157  | 17.4  | 9.51  | 4.81 | 2 | 1 |
| -<br>7.344E+18 | IsMasterProtein | A0A8C5AQ53 | Rho GTPase activating protein 21b OS=Gadus morhua OX=8049 GN=arhgap21b PE=4 SV=1              | 3  | 2 | 2 | 2 | 1124 | 123.4 | 8.68  | 4.81 | 2 | 1 |
| -<br>7.293E+18 | IsMasterProtein | A0A8C5BBS3 | Elongation factor 1-delta-like OS=Gadus morhua OX=8049 GN=LOC115548356 PE=3 SV=1              | 6  | 2 | 2 | 2 | 398  | 43    | 5.33  | 4.8  | 2 | 1 |
| -<br>5.117E+18 | IsMasterProtein | A0A8C5CCJ8 | Alpha-ketoglutarate-dependent dioxygenase FTO OS=Gadus morhua OX=8049 PE=3 SV=1               | 3  | 2 | 2 | 2 | 505  | 57.3  | 7.93  | 4.8  | 2 | 1 |
| -<br>8.671E+18 | IsMasterProtein | A0A8C5BQX7 | Toll-like receptor 7 OS=Gadus morhua OX=8049 PE=4 SV=1                                        | 3  | 2 | 2 | 2 | 1274 | 140.3 | 5.48  | 4.8  | 2 | 1 |
| -<br>1.605E+18 | IsMasterProtein | A0A8C4ZZ86 | Leucine-rich repeat neuronal protein 4-like OS=Gadus morhua OX=8049 GN=LOC115533293 PE=4 SV=1 | 9  | 2 | 2 | 2 | 424  | 44    | 8.75  | 4.8  | 2 | 1 |
| -<br>1.557E+18 | IsMasterProtein | A0A8C4ZM07 | PAXIP1 associated glutamate-rich protein 1 OS=Gadus morhua OX=8049 GN=pagr1 PE=4 SV=1         | 13 | 2 | 2 | 2 | 281  | 31.8  | 4.61  | 4.79 | 2 | 1 |
| -<br>7.49E+18  | IsMasterProtein | A0A8C5FNV0 | Uncharacterized protein OS=Gadus morhua OX=8049 PE=3 SV=1                                     | 2  | 2 | 2 | 2 | 1975 | 225.6 | 9.01  | 4.79 | 2 | 1 |
| 3.1614E+18     | IsMasterProtein | A0A8C5CRK8 | SH3 and multiple ankyrin repeat domains 3b OS=Gadus morhua OX=8049 PE=3 SV=1                  | 2  | 2 | 2 | 2 | 1544 | 168.6 | 9.38  | 4.79 | 2 | 1 |
| 6.1208E+18     | IsMasterProtein | A0A8C4ZMP4 | Sodium channel and clathrin linker 1 OS=Gadus morhua OX=8049 GN=sclt1 PE=4 SV=1               | 3  | 2 | 2 | 2 | 691  | 80.3  | 5.77  | 4.79 | 2 | 1 |
| 3.5211E+18     | IsMasterProtein | A0A8C5BW18 | Myosin binding protein C, slow type OS=Gadus morhua OX=8049 PE=4 SV=1                         | 3  | 2 | 2 | 2 | 1108 | 124.6 | 6.47  | 4.79 | 2 | 1 |
| -<br>3.87E+18  | IsMasterProtein | A0A8C5CK75 | Glutamine synthetase OS=Gadus morhua OX=8049 GN=glulb PE=3 SV=1                               | 6  | 2 | 2 | 2 | 375  | 41.7  | 6.4   | 4.79 | 2 | 1 |
| -<br>8.424E+18 | IsMasterProtein | A0A8C5ACR6 | Ribosomal L16 domain-containing protein OS=Gadus morhua OX=8049 PE=3 SV=1                     | 16 | 2 | 2 | 2 | 179  | 20.4  | 10.83 | 4.79 | 2 | 1 |
| -<br>5.909E+18 | IsMasterProtein | A0A8C5AXD7 | Phosphoinositide phospholipase C OS=Gadus morhua OX=8049 GN=LOC115547957 PE=4 SV=1            | 5  | 2 | 2 | 2 | 773  | 88.1  | 6.6   | 4.79 | 2 | 1 |
| -<br>7.233E+18 | IsMasterProtein | A0A8C5CB02 | SMC hinge domain-containing protein OS=Gadus morhua OX=8049 PE=3 SV=1                         | 3  | 2 | 2 | 2 | 1118 | 127.9 | 8.13  | 4.79 | 2 | 1 |
| 1.6595E+18     | IsMasterProtein | A0A8C4YVZ7 | PCNA-interacting partner OS=Gadus morhua OX=8049 PE=3 SV=1                                    | 6  | 2 | 2 | 2 | 579  | 62.4  | 9.2   | 4.79 | 2 | 1 |

|                |                 |            |                                                                                                             |    |   |   |   |      |       |      |      |   |   |
|----------------|-----------------|------------|-------------------------------------------------------------------------------------------------------------|----|---|---|---|------|-------|------|------|---|---|
| -<br>8.583E+18 | IsMasterProtein | A0A8C5BBY7 | Inactive ubiquitin carboxyl-terminal hydrolase 53-like OS=Gadus morhua OX=8049 GN=USP53 PE=4 SV=1           | 4  | 2 | 2 | 2 | 1079 | 119.7 | 8.65 | 4.79 | 2 | 1 |
| 3.744E+18      | IsMasterProtein | A0A8C5AJJ0 | Aryl hydrocarbon receptor nuclear translocator-like 1a OS=Gadus morhua OX=8049 GN=arntl1a PE=4 SV=1         | 9  | 2 | 2 | 2 | 608  | 67    | 7.14 | 4.78 | 2 | 1 |
| -<br>7.69E+18  | IsMasterProtein | A0A8C5A5H9 | Epidermal growth factor receptor substrate 15-like 1 OS=Gadus morhua OX=8049 GN=LOC115548377 PE=4 SV=1      | 4  | 2 | 2 | 2 | 842  | 92.4  | 5.19 | 4.78 | 2 | 1 |
| 2.519E+18      | IsMasterProtein | A0A8C5CXG5 | Polyketide synthase 1 OS=Gadus morhua OX=8049 GN=pk51 PE=4 SV=1                                             | 2  | 2 | 2 | 2 | 2079 | 230.6 | 6.61 | 4.78 | 2 | 1 |
| -<br>7.421E+18 | IsMasterProtein | A0A8C5FC61 | BTAF1 RNA polymerase II, B-TFIID transcription factor-associated OS=Gadus morhua OX=8049 GN=btaf1 PE=4 SV=1 | 2  | 2 | 2 | 2 | 1857 | 207.3 | 6.93 | 4.78 | 2 | 1 |
| 3.685E+18      | IsMasterProtein | A0A8C4ZE00 | Metabolism of cobalamin associated D OS=Gadus morhua OX=8049 PE=4 SV=1                                      | 10 | 2 | 2 | 2 | 310  | 34    | 5.4  | 4.78 | 2 | 1 |
| 8.4591E+17     | IsMasterProtein | A0A8C4ZNI4 | Non-specific serine/threonine protein kinase OS=Gadus morhua OX=8049 GN=tp53rk PE=3 SV=1                    | 12 | 2 | 2 | 2 | 239  | 27.1  | 9.38 | 4.78 | 2 | 1 |
| -<br>8.568E+18 | IsMasterProtein | A0A8C5F8H7 | Uncharacterized protein OS=Gadus morhua OX=8049 PE=4 SV=1                                                   | 6  | 2 | 2 | 2 | 375  | 40.9  | 6.16 | 4.78 | 2 | 1 |
| -<br>7.404E+18 | IsMasterProtein | A0A8C5BXY1 | Transmembrane 9 superfamily member OS=Gadus morhua OX=8049 PE=3 SV=1                                        | 5  | 2 | 2 | 2 | 589  | 67.8  | 7.06 | 4.77 | 2 | 1 |
| -<br>2.347E+17 | IsMasterProtein | A0A8C5C8H1 | SERPIN domain-containing protein OS=Gadus morhua OX=8049 PE=3 SV=1                                          | 6  | 2 | 2 | 2 | 466  | 50.5  | 5.08 | 4.77 | 2 | 1 |
| -<br>4.061E+17 | IsMasterProtein | A0A8C5A297 | Anion exchange protein OS=Gadus morhua OX=8049 GN=LOC115541395 PE=3 SV=1                                    | 4  | 2 | 2 | 2 | 1062 | 118.6 | 7.15 | 4.77 | 2 | 1 |
| -<br>5.469E+18 | IsMasterProtein | A0A8C5F755 | MLLT1 super elongation complex subunit a OS=Gadus morhua OX=8049 PE=4 SV=1                                  | 6  | 2 | 2 | 2 | 508  | 55.6  | 8.84 | 4.77 | 2 | 1 |
| -<br>4.815E+18 | IsMasterProtein | A0A8C4ZH98 | Kinesin-like protein OS=Gadus morhua OX=8049 GN=KIF5C PE=3 SV=1                                             | 2  | 2 | 2 | 2 | 934  | 105.8 | 7.49 | 4.77 | 2 | 1 |
| -<br>4.172E+18 | IsMasterProtein | A0A8C5BVJ5 | Dynein regulatory complex subunit 7 OS=Gadus morhua OX=8049 GN=ccdc135 PE=3 SV=1                            | 3  | 2 | 2 | 2 | 843  | 96.7  | 6.33 | 4.76 | 2 | 1 |
| -<br>7.832E+18 | IsMasterProtein | A0A8C5AWN6 | Uncharacterized protein OS=Gadus morhua OX=8049 PE=4 SV=1                                                   | 4  | 2 | 2 | 2 | 937  | 100.9 | 5.58 | 4.76 | 2 | 1 |
| -<br>4.772E+18 | IsMasterProtein | A0A8C4YXE1 | Calumenin a OS=Gadus morhua OX=8049 GN=calua PE=3 SV=1                                                      | 10 | 2 | 2 | 2 | 315  | 37.1  | 4.72 | 4.76 | 2 | 1 |
| 8.6843E+18     | IsMasterProtein | A0A8C5ADT4 | BUD13 homolog OS=Gadus morhua OX=8049 GN=bud13 PE=3 SV=1                                                    | 5  | 2 | 2 | 2 | 516  | 58.8  | 9.31 | 4.76 | 2 | 1 |
| -<br>8.966E+18 | IsMasterProtein | A0A8C5FN23 | Glutamine--tRNA ligase OS=Gadus morhua OX=8049 GN=qars1 PE=3 SV=1                                           | 4  | 2 | 2 | 2 | 750  | 85.6  | 8.16 | 4.75 | 2 | 1 |
| -<br>8.606E+18 | IsMasterProtein | A0A8C4YXD3 | Cytochrome c oxidase subunit 5A, mitochondrial OS=Gadus morhua OX=8049 GN=chcd3b PE=3 SV=1                  | 8  | 2 | 2 | 2 | 129  | 14.4  | 5.55 | 4.75 | 2 | 1 |
| -<br>7.335E+18 | IsMasterProtein | A0A8C5D779 | RING-type E3 ubiquitin transferase OS=Gadus morhua OX=8049 GN=trim36 PE=4 SV=1                              | 4  | 2 | 2 | 2 | 758  | 85.3  | 6.62 | 4.75 | 2 | 1 |
| -<br>6.513E+18 | IsMasterProtein | A0A8C5AU74 | Rap guanine nucleotide exchange factor 2 OS=Gadus morhua OX=8049 PE=3 SV=1                                  | 2  | 2 | 2 | 2 | 1577 | 174.4 | 6.8  | 4.75 | 2 | 1 |

|                |                 |            |                                                                                                                  |    |   |   |   |      |       |      |      |   |   |
|----------------|-----------------|------------|------------------------------------------------------------------------------------------------------------------|----|---|---|---|------|-------|------|------|---|---|
| -<br>7.782E+18 | IsMasterProtein | A0A8C4YVG6 | Mitogen-activated protein kinase kinase OS=Gadus morhua OX=8049 GN=MAP3K12 PE=3 SV=1                             | 4  | 2 | 2 | 2 | 725  | 80.2  | 7.03 | 4.75 | 2 | 1 |
| 2.8534E+18     | IsMasterProtein | A0A8C4YXU9 | Phosphodiesterase OS=Gadus morhua OX=8049 GN=pde1b PE=3 SV=1                                                     | 4  | 2 | 2 | 2 | 538  | 61.5  | 6.28 | 4.75 | 2 | 1 |
| -<br>8.88E+18  | IsMasterProtein | A0A8C5FTU0 | Mitochondrial import inner membrane translocase subunit TIM44 OS=Gadus morhua OX=8049 GN=LOC115549086 PE=3 SV=1  | 9  | 2 | 3 | 2 | 417  | 47.4  | 6.21 | 4.75 | 2 | 1 |
| 6.216E+18      | IsMasterProtein | A0A8C4ZME5 | CortBP2 domain-containing protein OS=Gadus morhua OX=8049 PE=4 SV=1                                              | 4  | 2 | 2 | 2 | 1103 | 125.6 | 6.18 | 4.75 | 2 | 1 |
| -<br>8.767E+18 | IsMasterProtein | A0A8C5FHS5 | Mitogen-activated protein kinase kinase OS=Gadus morhua OX=8049 GN=map3k21 PE=3 SV=1                             | 3  | 2 | 2 | 2 | 1030 | 112   | 7.58 | 4.75 | 2 | 1 |
| -<br>5.675E+18 | IsMasterProtein | A0A8C5CK69 | Disintegrin and metalloproteinase domain-containing protein 10 OS=Gadus morhua OX=8049 GN=LOC115550437 PE=4 SV=1 | 5  | 2 | 2 | 2 | 768  | 86    | 7.52 | 4.75 | 2 | 1 |
| -<br>3.661E+18 | IsMasterProtein | A0A8C5BKC7 | Calpain 7 OS=Gadus morhua OX=8049 GN=capn7 PE=3 SV=1                                                             | 4  | 2 | 2 | 2 | 812  | 91.6  | 7.3  | 4.74 | 2 | 1 |
| 5.0317E+18     | IsMasterProtein | A0A8C5CW63 | FERM, ARH/RhoGEF and pleckstrin domain protein 1 OS=Gadus morhua OX=8049 GN=FARP1 PE=4 SV=1                      | 4  | 2 | 2 | 2 | 1009 | 114   | 8.07 | 4.74 | 2 | 1 |
| -<br>7.736E+18 | IsMasterProtein | A0A8C5AYM4 | SEC14 and spectrin domains 1 OS=Gadus morhua OX=8049 GN=sest1 PE=4 SV=1                                          | 8  | 2 | 2 | 2 | 379  | 43.5  | 5.35 | 4.74 | 2 | 1 |
| -<br>4.379E+18 | IsMasterProtein | A0A8C5AQC8 | Microtubule associated protein 10 OS=Gadus morhua OX=8049 GN=map10 PE=4 SV=1                                     | 4  | 2 | 2 | 2 | 862  | 93.1  | 6.81 | 4.74 | 2 | 1 |
| -<br>8.24E+18  | IsMasterProtein | A0A8C5BZ54 | Dystrobrevin OS=Gadus morhua OX=8049 PE=3 SV=1                                                                   | 5  | 2 | 2 | 2 | 608  | 68.8  | 8.46 | 4.74 | 2 | 1 |
| 8.289E+17      | IsMasterProtein | A0A8C5CN81 | Cyclin-dependent kinase-like 5 OS=Gadus morhua OX=8049 GN=cdk15 PE=4 SV=1                                        | 3  | 2 | 2 | 2 | 1398 | 153.9 | 9.67 | 4.74 | 2 | 1 |
| -<br>3.866E+18 | IsMasterProtein | A0A8C4ZDV9 | Transporter OS=Gadus morhua OX=8049 GN=LOC115535627 PE=3 SV=1                                                    | 4  | 2 | 2 | 2 | 641  | 72.2  | 6.14 | 4.74 | 2 | 1 |
| -<br>8.751E+18 | IsMasterProtein | A0A8C5ABD5 | Protein kinase C OS=Gadus morhua OX=8049 GN=prkcd PE=3 SV=1                                                      | 5  | 2 | 2 | 2 | 670  | 76.6  | 7.64 | 4.74 | 2 | 1 |
| 1.3278E+17     | IsMasterProtein | A0A8C4YXQ8 | Regulator of chromosome condensation 2 OS=Gadus morhua OX=8049 GN=rec2 PE=4 SV=1                                 | 6  | 2 | 2 | 2 | 494  | 54.1  | 8.6  | 4.74 | 2 | 1 |
| 4.2916E+18     | IsMasterProtein | A0A8C5F473 | Golgin A2 OS=Gadus morhua OX=8049 GN=golga2 PE=4 SV=1                                                            | 3  | 2 | 2 | 2 | 1091 | 122.5 | 5.39 | 4.73 | 2 | 1 |
| 7.4652E+18     | IsMasterProtein | A0A8C5A6R2 | Phosphate transporter OS=Gadus morhua OX=8049 GN=slc20a2 PE=3 SV=1                                               | 5  | 2 | 2 | 2 | 725  | 77.8  | 7.28 | 4.73 | 2 | 1 |
| 4.2644E+16     | IsMasterProtein | A0A8C5CIII | ERBB receptor feedback inhibitor 1a OS=Gadus morhua OX=8049 PE=4 SV=1                                            | 7  | 2 | 2 | 2 | 407  | 45.3  | 9.52 | 4.73 | 2 | 1 |
| -<br>6.136E+18 | IsMasterProtein | A0A8C5CC95 | Centrosomal protein 135 OS=Gadus morhua OX=8049 GN=cep135 PE=4 SV=1                                              | 4  | 2 | 2 | 2 | 1171 | 135.2 | 6.33 | 4.72 | 2 | 1 |
| -<br>7.635E+18 | IsMasterProtein | A0A8C5AB95 | Importin 8 OS=Gadus morhua OX=8049 GN=ipo8 PE=4 SV=1                                                             | 2  | 2 | 2 | 2 | 1025 | 118.1 | 5.12 | 4.72 | 2 | 1 |
| -<br>2.74E+18  | IsMasterProtein | A0A8C5AUV4 | Uncharacterized protein OS=Gadus morhua OX=8049 PE=3 SV=1                                                        | 5  | 2 | 2 | 2 | 673  | 74.8  | 6.32 | 4.72 | 2 | 1 |
| 8.822E+18      | IsMasterProtein | A0A8C5BD46 | Uncharacterized protein OS=Gadus morhua OX=8049 PE=4 SV=1                                                        | 17 | 2 | 2 | 2 | 150  | 17.8  | 9.66 | 4.72 | 2 | 1 |
| 1.1078E+18     | IsMasterProtein | A0A8C5B6K8 | PHD-type domain-containing protein OS=Gadus morhua OX=8049 PE=4 SV=1                                             | 12 | 2 | 2 | 2 | 328  | 36.9  | 8.59 | 4.72 | 2 | 1 |



|                |                 |            |                                                                                                      |   |   |   |   |      |       |      |      |   |   |
|----------------|-----------------|------------|------------------------------------------------------------------------------------------------------|---|---|---|---|------|-------|------|------|---|---|
| -<br>8.449E+18 | IsMasterProtein | A0A8C4Z075 | Uncharacterized protein OS=Gadus morhua OX=8049 PE=4 SV=1                                            | 6 | 2 | 2 | 2 | 496  | 56.8  | 7.4  | 4.71 | 2 | 1 |
| -<br>8.209E+18 | IsMasterProtein | A0A8C4YWZ0 | FH2 domain containing 3 OS=Gadus morhua OX=8049 GN=fhdc3 PE=4 SV=1                                   | 4 | 2 | 2 | 2 | 858  | 93.3  | 6.55 | 4.71 | 2 | 1 |
| 8.2384E+18     | IsMasterProtein | A0A8C4ZL58 | Kazal-like domain-containing protein OS=Gadus morhua OX=8049 PE=3 SV=1                               | 1 | 2 | 2 | 2 | 1875 | 207.9 | 8.02 | 4.71 | 2 | 1 |
| 8.243E+18      | IsMasterProtein | A0A8C5BLP3 | KIAA1522 ortholog OS=Gadus morhua OX=8049 GN=kiaa1522 PE=4 SV=1                                      | 3 | 2 | 2 | 2 | 1476 | 157.7 | 6.14 | 4.71 | 2 | 1 |
| -<br>5.969E+18 | IsMasterProtein | A0A8C4Z2R5 | Transmembrane serine protease 5 OS=Gadus morhua OX=8049 GN=tmprrs5 PE=4 SV=1                         | 4 | 2 | 2 | 2 | 508  | 54.5  | 8.1  | 4.71 | 2 | 1 |
| 3.8099E+18     | IsMasterProtein | A0A8C4Z876 | Immunoglobulin superfamily containing leucine-rich repeat 2 OS=Gadus morhua OX=8049 PE=4 SV=1        | 5 | 2 | 2 | 2 | 729  | 79.9  | 5.85 | 4.71 | 2 | 1 |
| 6.0264E+16     | IsMasterProtein | A0A8C5BSI1 | PH domain-containing protein OS=Gadus morhua OX=8049 PE=4 SV=1                                       | 2 | 2 | 2 | 2 | 1299 | 144   | 7.96 | 4.71 | 2 | 1 |
| -<br>8.764E+18 | IsMasterProtein | A0A8C5BG83 | Zf-CXXC and PHD_FXL19 domain-containing protein OS=Gadus morhua OX=8049 GN=zgc:158376 PE=4 SV=1      | 5 | 2 | 2 | 2 | 978  | 102.9 | 8.63 | 4.71 | 2 | 1 |
| -<br>8.803E+18 | IsMasterProtein | A0A8C5CV44 | Far upstream element-binding protein 3-like OS=Gadus morhua OX=8049 GN=LOC115545032 PE=4 SV=1        | 7 | 2 | 2 | 2 | 411  | 44.3  | 8.29 | 4.71 | 2 | 1 |
| -<br>8.919E+18 | IsMasterProtein | A0A8C5CZV0 | Trinucleotide repeat containing adaptor 6A OS=Gadus morhua OX=8049 GN=tnrc6a PE=4 SV=1               | 3 | 2 | 2 | 2 | 1593 | 162.4 | 6.92 | 4.71 | 2 | 1 |
| -<br>5.862E+18 | IsMasterProtein | A0A8C5D0R8 | ATPase family AAA domain containing 2 OS=Gadus morhua OX=8049 GN=atad2 PE=3 SV=1                     | 4 | 2 | 2 | 2 | 1054 | 115.2 | 5.97 | 4.71 | 2 | 1 |
| -<br>6.896E+18 | IsMasterProtein | A0A8C4ZMZ4 | Receptor-interacting serine-threonine kinase 2 OS=Gadus morhua OX=8049 PE=4 SV=1                     | 5 | 2 | 2 | 2 | 646  | 69.7  | 7.99 | 4.7  | 2 | 1 |
| 2.942E+18      | IsMasterProtein | A0A8C5BEZ8 | Retinoic acid receptor beta-like OS=Gadus morhua OX=8049 GN=LOC115554633 PE=3 SV=1                   | 5 | 2 | 2 | 2 | 566  | 62.9  | 7.61 | 4.7  | 2 | 1 |
| -<br>7.996E+18 | IsMasterProtein | A0A8C5AZ39 | Phosphofurin acidic cluster sorting protein 2-like OS=Gadus morhua OX=8049 GN=LOC115560304 PE=3 SV=1 | 6 | 2 | 2 | 2 | 816  | 91.2  | 7.05 | 4.7  | 2 | 1 |
| -<br>3.099E+18 | IsMasterProtein | A0A8C5BXF4 | Armadillo repeat containing 5 OS=Gadus morhua OX=8049 PE=4 SV=1                                      | 5 | 2 | 2 | 2 | 1016 | 104.1 | 6.95 | 4.7  | 2 | 1 |
| -<br>8.385E+18 | IsMasterProtein | A0A8C5ANW7 | Solute carrier family 2 member 12 OS=Gadus morhua OX=8049 GN=slc2a12 PE=4 SV=1                       | 7 | 2 | 2 | 2 | 586  | 61.7  | 8.84 | 4.7  | 2 | 1 |
| 9.1157E+18     | IsMasterProtein | A0A8C5F8E4 | Bromodomain adjacent to zinc finger domain, 1A OS=Gadus morhua OX=8049 PE=4 SV=1                     | 2 | 2 | 2 | 2 | 1108 | 125.9 | 5.43 | 4.7  | 2 | 1 |
| -<br>3.853E+18 | IsMasterProtein | A0A8C5FKY9 | Agenet-like domain-containing protein OS=Gadus morhua OX=8049 PE=3 SV=1                              | 6 | 2 | 2 | 2 | 660  | 73.7  | 8.07 | 4.7  | 2 | 1 |
| -<br>4.655E+17 | IsMasterProtein | A0A8C5F7A2 | Adenylosuccinate synthetase isozyme 1 OS=Gadus morhua OX=8049 GN=adss1 PE=3 SV=1                     | 7 | 2 | 2 | 2 | 471  | 51.7  | 8.53 | 4.7  | 2 | 1 |
| 4.9899E+18     | IsMasterProtein | A0A8C5CVR7 | G_PROTEIN_RECEP_F1_2 domain-containing protein OS=Gadus morhua OX=8049 PE=4 SV=1                     | 5 | 2 | 2 | 2 | 353  | 39.6  | 9.76 | 4.7  | 2 | 1 |
| -<br>5.918E+18 | IsMasterProtein | A0A8C5CWQ1 | Uncharacterized LOC115545276 OS=Gadus morhua OX=8049 GN=si:ch211-214j8.12 PE=4 SV=1                  | 5 | 2 | 2 | 2 | 722  | 78.9  | 6.21 | 4.7  | 2 | 1 |

|                |                 |            |                                                                                                               |    |   |   |   |      |       |      |      |   |   |
|----------------|-----------------|------------|---------------------------------------------------------------------------------------------------------------|----|---|---|---|------|-------|------|------|---|---|
| -<br>3.862E+18 | IsMasterProtein | A0A8C5FHN9 | Uncharacterized protein OS=Gadus morhua OX=8049 PE=4 SV=1                                                     | 4  | 2 | 2 | 2 | 1001 | 105.7 | 9.25 | 4.7  | 2 | 1 |
| -<br>7.504E+18 | IsMasterProtein | A0A8C4YVQ3 | CUB and Sushi multiple domains 2 OS=Gadus morhua OX=8049 PE=4 SV=1                                            | 1  | 2 | 2 | 2 | 3583 | 392   | 6.34 | 4.69 | 2 | 1 |
| -<br>5.439E+18 | IsMasterProtein | A0A8C4ZUF8 | Eukaryotic translation initiation factor 4Ba OS=Gadus morhua OX=8049 GN=eif4ba PE=4 SV=1                      | 5  | 2 | 2 | 2 | 659  | 72    | 6.83 | 4.69 | 2 | 1 |
| 2.4256E+18     | IsMasterProtein | A0A8C5CYE1 | SH3GL interacting endocytic adaptor 1a OS=Gadus morhua OX=8049 PE=4 SV=1                                      | 3  | 2 | 2 | 2 | 992  | 104   | 5.1  | 4.68 | 2 | 1 |
| -<br>2.694E+18 | IsMasterProtein | A0A8C5AAC6 | Cullin-5 OS=Gadus morhua OX=8049 GN=LOC115561383 PE=3 SV=1                                                    | 3  | 2 | 2 | 2 | 829  | 96.4  | 7.83 | 4.68 | 2 | 1 |
| 3.0608E+18     | IsMasterProtein | A0A8C5AX22 | LIM and calponin homology domains-containing protein 1-like OS=Gadus morhua OX=8049 GN=LOC115540066 PE=4 SV=1 | 2  | 2 | 2 | 2 | 2051 | 225.5 | 5.54 | 4.68 | 2 | 1 |
| -<br>6.72E+18  | IsMasterProtein | A0A8C5AC22 | Uncharacterized protein OS=Gadus morhua OX=8049 PE=4 SV=1                                                     | 15 | 2 | 2 | 2 | 113  | 12.9  | 9.03 | 4.68 | 2 | 1 |
| -<br>6.558E+18 | IsMasterProtein | A0A8C5FEF4 | Transient receptor potential cation channel subfamily C member 6 OS=Gadus morhua OX=8049 PE=4 SV=1            | 4  | 2 | 2 | 2 | 831  | 93.3  | 6.44 | 4.68 | 2 | 1 |
| -<br>6.367E+15 | IsMasterProtein | A0A8C4ZLZ1 | Collagen alpha-1(XVII) chain-like OS=Gadus morhua OX=8049 GN=LOC115560299 PE=4 SV=1                           | 1  | 2 | 2 | 2 | 1956 | 191.9 | 9.35 | 4.68 | 2 | 1 |
| 2.4272E+18     | IsMasterProtein | A0A8C5FJK6 | S1 RNA binding domain 1 OS=Gadus morhua OX=8049 GN=SRBD1 PE=4 SV=1                                            | 4  | 2 | 2 | 2 | 835  | 92.6  | 8.57 | 4.68 | 2 | 1 |
| 6.2931E+17     | IsMasterProtein | A0A8C4ZH14 | Capping protein regulator and myosin 1 linker 3 OS=Gadus morhua OX=8049 PE=3 SV=1                             | 4  | 2 | 2 | 2 | 1114 | 122.6 | 8.38 | 4.68 | 2 | 1 |
| -<br>3.607E+15 | IsMasterProtein | A0A8C5BA19 | CPL domain-containing protein OS=Gadus morhua OX=8049 PE=4 SV=1                                               | 4  | 2 | 2 | 2 | 558  | 63.1  | 9.03 | 4.67 | 2 | 1 |
| -<br>5.272E+18 | IsMasterProtein | A0A8C5FP86 | Uncharacterized protein OS=Gadus morhua OX=8049 PE=4 SV=1                                                     | 1  | 2 | 2 | 2 | 3158 | 349.7 | 8    | 4.67 | 2 | 1 |
| 9.9487E+17     | IsMasterProtein | A0A8C5AHB9 | Peptidylprolyl isomerase OS=Gadus morhua OX=8049 GN=fkbp15b PE=4 SV=1                                         | 2  | 2 | 2 | 2 | 1290 | 139.4 | 4.68 | 4.67 | 2 | 1 |
| -<br>2.667E+18 | IsMasterProtein | A0A8C4Z5W8 | Uncharacterized protein OS=Gadus morhua OX=8049 PE=4 SV=1                                                     | 1  | 2 | 2 | 2 | 4210 | 452.1 | 6.24 | 4.67 | 2 | 1 |
| -<br>7.697E+18 | IsMasterProtein | A0A8C5AV87 | Uncharacterized protein OS=Gadus morhua OX=8049 PE=3 SV=1                                                     | 3  | 2 | 2 | 2 | 730  | 82.1  | 6.71 | 4.67 | 2 | 1 |
| 3.9732E+18     | IsMasterProtein | A0A8C4ZMK3 | RNA helicase OS=Gadus morhua OX=8049 PE=4 SV=1                                                                | 2  | 2 | 2 | 2 | 1223 | 139.3 | 8.12 | 4.67 | 2 | 1 |
| 2.5334E+17     | IsMasterProtein | A0A8C4Z1B3 | V(D)J recombination-activating protein 1 OS=Gadus morhua OX=8049 GN=rag1 PE=3 SV=1                            | 3  | 2 | 2 | 2 | 1097 | 122.8 | 8.25 | 4.67 | 2 | 1 |
| -<br>6.597E+18 | IsMasterProtein | A0A8C5CS66 | Fizzy/cell division cycle 20 related 1a OS=Gadus morhua OX=8049 GN=fzr1a PE=3 SV=1                            | 6  | 2 | 2 | 2 | 547  | 60.8  | 8.88 | 4.67 | 2 | 1 |
| -<br>5.516E+18 | IsMasterProtein | A0A8C5C2P4 | Tripartite motif containing 37 OS=Gadus morhua OX=8049 GN=trim37 PE=4 SV=1                                    | 4  | 2 | 2 | 2 | 794  | 89.4  | 5.71 | 4.67 | 2 | 1 |
| 1.0712E+18     | IsMasterProtein | A0A8C5ACW3 | Tumor necrosis factor receptor superfamily, member 1a OS=Gadus morhua OX=8049 GN=tnfrsf1a PE=4 SV=1           | 7  | 2 | 2 | 2 | 401  | 45    | 7.15 | 4.66 | 2 | 1 |
| 6.4926E+18     | IsMasterProtein | A0A8C5CR06 | Spalt-like transcription factor 3b OS=Gadus morhua OX=8049 GN=sall3b PE=4 SV=1                                | 3  | 2 | 2 | 2 | 1352 | 144   | 6.77 | 4.66 | 2 | 1 |

|                |                 |            |                                                                                                       |    |   |   |   |      |       |       |      |   |   |
|----------------|-----------------|------------|-------------------------------------------------------------------------------------------------------|----|---|---|---|------|-------|-------|------|---|---|
| -<br>7.08E+18  | IsMasterProtein | A0A8C5C5M1 | Myosin IIIA OS=Gadus morhua OX=8049 PE=3 SV=1                                                         | 2  | 2 | 2 | 2 | 1794 | 201.8 | 6.32  | 4.66 | 2 | 1 |
| -<br>7.775E+18 | IsMasterProtein | A0A8C5A1X0 | BRCA1 associated RING domain 1 OS=Gadus morhua OX=8049 PE=4 SV=1                                      | 5  | 2 | 2 | 2 | 729  | 79.1  | 9.01  | 4.66 | 2 | 1 |
| 3.5439E+17     | IsMasterProtein | A0A8C4ZCH7 | Striated muscle enriched protein kinase b OS=Gadus morhua OX=8049 GN=spegb PE=3 SV=1                  | 0  | 2 | 2 | 2 | 3617 | 397.9 | 7.85  | 4.66 | 2 | 1 |
| -<br>7.178E+18 | IsMasterProtein | A0A8C5BJF4 | Histone demethylase UTY-like OS=Gadus morhua OX=8049 GN=LOC115541949 PE=4 SV=1                        | 3  | 2 | 2 | 2 | 1382 | 148.7 | 8.13  | 4.66 | 2 | 1 |
| -<br>1.627E+18 | IsMasterProtein | A0A8C5CAB1 | Phosphorylated adapter RNA export protein OS=Gadus morhua OX=8049 GN=phax PE=3 SV=1                   | 8  | 2 | 2 | 2 | 441  | 48.4  | 5.08  | 4.66 | 2 | 1 |
| 5.6137E+18     | IsMasterProtein | A0A8C5B4T8 | Uncharacterized protein OS=Gadus morhua OX=8049 PE=4 SV=1                                             | 7  | 2 | 2 | 2 | 487  | 53.6  | 8.65  | 4.65 | 2 | 1 |
| -<br>5.646E+16 | IsMasterProtein | A0A8C5AYK7 | SCA7 domain-containing protein OS=Gadus morhua OX=8049 PE=4 SV=1                                      | 6  | 2 | 2 | 2 | 671  | 68.2  | 10.67 | 4.65 | 2 | 1 |
| 2.3473E+18     | IsMasterProtein | A0A8C5BGA6 | Septin OS=Gadus morhua OX=8049 GN=LOC115547362 PE=3 SV=1                                              | 5  | 2 | 2 | 2 | 441  | 50.5  | 8.09  | 4.65 | 2 | 1 |
| -<br>1.502E+18 | IsMasterProtein | A0A8C5CSF8 | Uncharacterized protein OS=Gadus morhua OX=8049 PE=4 SV=1                                             | 3  | 2 | 2 | 2 | 1056 | 113.7 | 9.91  | 4.65 | 2 | 1 |
| -<br>4.07E+18  | IsMasterProtein | A0A8C5ACP0 | Erythrocyte membrane protein band 4.1-like 3b OS=Gadus morhua OX=8049 PE=4 SV=1                       | 3  | 2 | 2 | 2 | 995  | 109.3 | 5.03  | 4.65 | 2 | 1 |
| -<br>4.823E+18 | IsMasterProtein | A0A8C5CQA0 | SCY1-like, kinase-like 1 OS=Gadus morhua OX=8049 GN=scyl1 PE=4 SV=1                                   | 4  | 2 | 2 | 2 | 788  | 85.2  | 7.34  | 4.65 | 2 | 1 |
| -<br>5.041E+18 | IsMasterProtein | A0A8C4ZK16 | Phosphoinositide phospholipase C OS=Gadus morhua OX=8049 GN=PLCB1 PE=4 SV=1                           | 3  | 2 | 2 | 2 | 907  | 102.1 | 6.34  | 4.64 | 2 | 1 |
| 2.1791E+18     | IsMasterProtein | A0A8C5BI90 | Dynein axonemal heavy chain 3 OS=Gadus morhua OX=8049 PE=3 SV=1                                       | 1  | 2 | 2 | 2 | 3893 | 438.7 | 6.02  | 4.64 | 2 | 1 |
| -<br>8.346E+18 | IsMasterProtein | A0A8C5AM35 | Phosphoenolpyruvate carboxykinase (GTP) OS=Gadus morhua OX=8049 PE=3 SV=1                             | 5  | 2 | 2 | 2 | 642  | 70.3  | 8.16  | 4.64 | 2 | 1 |
| -<br>4.661E+18 | IsMasterProtein | A0A8C4ZTS4 | Serine/threonine kinase receptor associated protein OS=Gadus morhua OX=8049 GN=strap PE=4 SV=1        | 15 | 2 | 2 | 2 | 335  | 36.9  | 6.68  | 4.64 | 2 | 1 |
| 5.0514E+18     | IsMasterProtein | A0A8C5FQQ1 | Uncharacterized protein OS=Gadus morhua OX=8049 PE=4 SV=1                                             | 5  | 2 | 2 | 2 | 572  | 64.4  | 7.37  | 4.63 | 2 | 1 |
| -<br>5.071E+18 | IsMasterProtein | A0A8C4Z552 | E3 ubiquitin-protein ligase OS=Gadus morhua OX=8049 GN=hectd1 PE=3 SV=1                               | 1  | 2 | 2 | 2 | 2559 | 281.9 | 5.52  | 4.63 | 2 | 1 |
| -<br>8.971E+18 | IsMasterProtein | A0A8C5ARS9 | SH3-binding domain protein 5-like, a OS=Gadus morhua OX=8049 PE=3 SV=1                                | 9  | 2 | 2 | 2 | 412  | 44.9  | 5.57  | 4.63 | 2 | 1 |
| -<br>8.558E+18 | IsMasterProtein | A0A8C5AWV4 | Disco interacting protein 2 homolog C OS=Gadus morhua OX=8049 GN=DIP2C PE=4 SV=1                      | 3  | 2 | 2 | 2 | 902  | 98.5  | 6.89  | 4.63 | 2 | 1 |
| -<br>6.754E+18 | IsMasterProtein | A0A8C5FSU3 | Roundabout, axon guidance receptor, homolog 2 (Drosophila) OS=Gadus morhua OX=8049 GN=robo2 PE=4 SV=1 | 2  | 2 | 2 | 2 | 1446 | 157.1 | 6.32  | 4.62 | 2 | 1 |
| -<br>1.86E+18  | IsMasterProtein | A0A8C4ZIY5 | SUN domain-containing protein OS=Gadus morhua OX=8049 PE=4 SV=1                                       | 4  | 2 | 2 | 2 | 1054 | 117.2 | 5.17  | 4.62 | 2 | 1 |

|                    |                     |                |                                                                                                       |    |   |   |   |      |           |      |      |   |   |
|--------------------|---------------------|----------------|-------------------------------------------------------------------------------------------------------|----|---|---|---|------|-----------|------|------|---|---|
| -<br>7.115E+1<br>8 | IsMasterProt<br>ein | A0A8C5AM<br>L8 | Uncharacterized oxidoreductase YtbE-like OS=Gadus morhua OX=8049<br>GN=LOC115529359 PE=3 SV=1         | 7  | 2 | 2 | 2 | 288  | 31.4      | 6.16 | 4.62 | 2 | 1 |
| -<br>3.457E+1<br>8 | IsMasterProt<br>ein | A0A8C5BA0<br>4 | AT rich interactive domain 1Ab (SWI-like) OS=Gadus morhua OX=8049<br>GN=arid1ab PE=4 SV=1             | 1  | 2 | 2 | 2 | 2425 | 261.<br>1 | 6.46 | 4.62 | 2 | 1 |
| -<br>6.304E+1<br>8 | IsMasterProt<br>ein | A0A8C4ZK2<br>9 | Uncharacterized protein OS=Gadus morhua OX=8049 PE=4 SV=1                                             | 3  | 2 | 2 | 2 | 1107 | 124.<br>4 | 6.8  | 4.61 | 2 | 1 |
| -<br>8.345E+1<br>8 | IsMasterProt<br>ein | A0A8C5CC<br>M9 | Non-specific serine/threonine protein kinase OS=Gadus morhua OX=8049<br>GN=mark3a PE=3 SV=1           | 6  | 2 | 2 | 2 | 688  | 76.3      | 9.61 | 4.61 | 2 | 1 |
| -<br>4.894E+1<br>8 | IsMasterProt<br>ein | A0A8C4ZTY<br>4 | Inosine-5'-monophosphate dehydrogenase OS=Gadus morhua OX=8049<br>GN=IMPDH PE=3 SV=1                  | 5  | 2 | 2 | 2 | 537  | 57.7      | 7.52 | 4.61 | 2 | 1 |
| -<br>3.409E+1<br>8 | IsMasterProt<br>ein | A0A8C5AW<br>E6 | Uncharacterized protein OS=Gadus morhua OX=8049 PE=4 SV=1                                             | 1  | 2 | 2 | 2 | 1918 | 209.<br>4 | 5.63 | 4.61 | 2 | 1 |
| -<br>8.966E+1<br>7 | IsMasterProt<br>ein | A0A8C5CBY<br>4 | F-BAR and double SH3 domains protein 2-like OS=Gadus morhua<br>OX=8049 GN=si:ch211-176g13.8 PE=4 SV=1 | 4  | 2 | 2 | 2 | 794  | 88        | 5.54 | 4.61 | 2 | 1 |
| -<br>2.729E+1<br>8 | IsMasterProt<br>ein | A0A8C5F9N<br>8 | KIAA0232 ortholog OS=Gadus morhua OX=8049 GN=kiaa0232 PE=4<br>SV=1                                    | 3  | 2 | 2 | 2 | 1346 | 147       | 4.92 | 4.61 | 2 | 1 |
| 9.1049E+<br>17     | IsMasterProt<br>ein | A0A8C4Z469     | Double-stranded RNA-binding protein Staufin homolog 2 OS=Gadus<br>morhua OX=8049 PE=4 SV=1            | 7  | 2 | 2 | 2 | 470  | 51.2      | 9.44 | 4.61 | 2 | 1 |
| -<br>1.489E+1<br>8 | IsMasterProt<br>ein | A0A8C5CEQ<br>0 | Reverse transcriptase domain-containing protein OS=Gadus morhua<br>OX=8049 PE=4 SV=1                  | 4  | 2 | 2 | 2 | 799  | 93.2      | 9.19 | 4.61 | 2 | 1 |
| 2.444E+1<br>8      | IsMasterProt<br>ein | A0A8C5C3C<br>0 | Polypeptide N-acetylgalactosaminyltransferase OS=Gadus morhua<br>OX=8049 GN=GALNT10 PE=3 SV=1         | 5  | 2 | 2 | 2 | 596  | 67.7      | 8.32 | 4.61 | 2 | 1 |
| -<br>4.118E+1<br>8 | IsMasterProt<br>ein | A0A8C5A7T<br>9 | Mothers against decapentaplegic homolog OS=Gadus morhua OX=8049<br>GN=LOC115558981 PE=3 SV=1          | 9  | 2 | 2 | 2 | 519  | 57.7      | 8.35 | 4.61 | 2 | 1 |
| -<br>6.706E+1<br>8 | IsMasterProt<br>ein | A0A8C5BVC<br>2 | Uncharacterized protein OS=Gadus morhua OX=8049 PE=4 SV=1                                             | 3  | 2 | 2 | 2 | 1159 | 132.<br>8 | 6.95 | 4.61 | 2 | 1 |
| 1.6928E+<br>18     | IsMasterProt<br>ein | A0A8C4ZIN1     | Uncharacterized LOC115553505 OS=Gadus morhua OX=8049<br>GN=si:ch211-197h24.6 PE=4 SV=1                | 7  | 2 | 2 | 2 | 420  | 46.1      | 9.48 | 4.61 | 2 | 1 |
| 6.7221E+<br>18     | IsMasterProt<br>ein | A0A8C5BEZ<br>5 | Cancer-related regulator of actin dynamics homolog OS=Gadus morhua<br>OX=8049 GN=CRACD PE=4 SV=1      | 4  | 2 | 2 | 2 | 808  | 91.7      | 7.03 | 4.61 | 2 | 1 |
| 7.6977E+<br>18     | IsMasterProt<br>ein | A0A8C5C063     | Uncharacterized protein OS=Gadus morhua OX=8049 PE=4 SV=1                                             | 12 | 2 | 2 | 2 | 267  | 30.1      | 9.1  | 4.6  | 2 | 1 |
| -<br>5.108E+1<br>8 | IsMasterProt<br>ein | A0A8C5AQF<br>2 | Interferon-induced GTP-binding protein Mx OS=Gadus morhua OX=8049<br>GN=LOC115539900 PE=3 SV=1        | 3  | 2 | 2 | 2 | 814  | 91.9      | 7.06 | 4.6  | 2 | 1 |
| -<br>1.955E+1<br>8 | IsMasterProt<br>ein | A0A8C5CKX<br>3 | Family with sequence similarity 184 member B OS=Gadus morhua<br>OX=8049 GN=fam184b PE=4 SV=1          | 2  | 2 | 2 | 2 | 1321 | 153.<br>7 | 5.97 | 4.6  | 2 | 1 |
| 4.8282E+<br>18     | IsMasterProt<br>ein | A0A8C5CU3<br>5 | Uncharacterized protein OS=Gadus morhua OX=8049 PE=3 SV=1                                             | 8  | 2 | 2 | 2 | 478  | 48.6      | 8.87 | 4.6  | 2 | 1 |
| 3.6513E+<br>18     | IsMasterProt<br>ein | A0A8C5FXD<br>0 | DNA replication licensing factor MCM7 OS=Gadus morhua OX=8049<br>GN=mcm7 PE=3 SV=1                    | 4  | 2 | 2 | 2 | 727  | 81.1      | 6.37 | 4.59 | 2 | 1 |
| -<br>7.461E+1<br>8 | IsMasterProt<br>ein | A0A8C5AQ5<br>8 | Switching B cell complex subunit SWAP70b OS=Gadus morhua<br>OX=8049 PE=4 SV=1                         | 4  | 2 | 2 | 2 | 612  | 71.4      | 6.11 | 4.59 | 2 | 1 |

|                |                 |            |                                                                                                   |   |   |   |   |      |       |      |      |   |   |
|----------------|-----------------|------------|---------------------------------------------------------------------------------------------------|---|---|---|---|------|-------|------|------|---|---|
| 1.1246E+18     | IsMasterProtein | A0A8C5F9J6 | Coiled-coil domain containing 88B OS=Gadus morhua OX=8049 PE=4 SV=1                               | 1 | 2 | 2 | 2 | 1730 | 194.8 | 5.2  | 4.59 | 2 | 1 |
| -<br>7.708E+18 | IsMasterProtein | A0A8C5FC71 | Matrix metalloproteinase-16-like OS=Gadus morhua OX=8049 GN=LOC115537083 PE=3 SV=1                | 6 | 2 | 2 | 2 | 569  | 64.4  | 9.22 | 4.59 | 2 | 1 |
| -<br>1.357E+18 | IsMasterProtein | A0A8C4Z6J8 | E1A binding protein p400 OS=Gadus morhua OX=8049 PE=4 SV=1                                        | 1 | 2 | 2 | 2 | 2869 | 312.5 | 8.69 | 4.58 | 2 | 1 |
| -<br>1.345E+18 | IsMasterProtein | A0A8C5BVY1 | RNA helicase OS=Gadus morhua OX=8049 GN=mov10 PE=3 SV=1                                           | 3 | 2 | 2 | 2 | 1022 | 115.6 | 7.34 | 4.58 | 2 | 1 |
| -<br>6.907E+18 | IsMasterProtein | A0A8C5B260 | Heterogeneous nuclear ribonucleoprotein Ub OS=Gadus morhua OX=8049 GN=hnrnpub PE=4 SV=1           | 4 | 2 | 2 | 2 | 847  | 91.9  | 5.2  | 4.58 | 2 | 1 |
| -<br>8.699E+18 | IsMasterProtein | A0A8C5CBG6 | Phosphoinositide phospholipase C OS=Gadus morhua OX=8049 GN=plcd1a PE=4 SV=1                      | 4 | 2 | 2 | 2 | 769  | 87.4  | 7.75 | 4.57 | 2 | 1 |
| 6.1825E+18     | IsMasterProtein | A0A8C5CWV1 | Poly [ADP-ribose] polymerase OS=Gadus morhua OX=8049 GN=parp14rs1 PE=3 SV=1                       | 2 | 2 | 2 | 2 | 1773 | 197.6 | 6.81 | 4.57 | 2 | 1 |
| -<br>7.503E+18 | IsMasterProtein | A0A8C5C454 | Uncharacterized LOC115560657 OS=Gadus morhua OX=8049 GN=LOC115560657 PE=4 SV=1                    | 4 | 2 | 2 | 2 | 517  | 57.8  | 5.16 | 4.57 | 2 | 1 |
| 2.4749E+18     | IsMasterProtein | A0A8C5A4K7 | Stromal antigen 2b OS=Gadus morhua OX=8049 GN=stag2b PE=3 SV=1                                    | 3 | 2 | 2 | 2 | 1227 | 139.8 | 5.38 | 4.57 | 2 | 1 |
| 6.0127E+18     | IsMasterProtein | A0A8C4Z7G0 | Vacuolar protein sorting-associated protein 18 homolog OS=Gadus morhua OX=8049 GN=vps18 PE=3 SV=1 | 3 | 2 | 2 | 2 | 985  | 113.2 | 6.1  | 4.56 | 2 | 1 |
| -<br>3.323E+18 | IsMasterProtein | A0A8C5C8C8 | Cracd like a OS=Gadus morhua OX=8049 GN=cracdla PE=4 SV=1                                         | 3 | 2 | 2 | 2 | 1089 | 117.2 | 7.84 | 4.56 | 2 | 1 |
| -<br>1.283E+18 | IsMasterProtein | A0A8C5F9M5 | Eosinophil peroxidase OS=Gadus morhua OX=8049 PE=4 SV=1                                           | 5 | 2 | 2 | 2 | 608  | 67    | 6.49 | 4.56 | 2 | 1 |
| -<br>8.946E+18 | IsMasterProtein | A0A8C5CDC0 | Phosphatidylinositol-4,5-bisphosphate 3-kinase OS=Gadus morhua OX=8049 GN=LOC115555323 PE=3 SV=1  | 3 | 2 | 2 | 2 | 1231 | 140.5 | 7.34 | 4.56 | 2 | 1 |
| 2.7329E+18     | IsMasterProtein | A0A8C4ZW7  | Kinesin-like protein OS=Gadus morhua OX=8049 PE=3 SV=1                                            | 5 | 2 | 2 | 2 | 598  | 64.3  | 9.29 | 4.56 | 2 | 1 |
| 6.9385E+18     | IsMasterProtein | A0A8C5FMI6 | Eukaryotic translation initiation factor 5B OS=Gadus morhua OX=8049 GN=eif5b PE=4 SV=1            | 4 | 2 | 2 | 2 | 811  | 91.7  | 6.92 | 4.56 | 2 | 1 |
| -<br>5.842E+18 | IsMasterProtein | A0A8C5CMS4 | Lysine (K)-specific demethylase 6A OS=Gadus morhua OX=8049 GN=kdm6a PE=4 SV=1                     | 2 | 2 | 2 | 2 | 1388 | 150.2 | 8.13 | 4.55 | 2 | 1 |
| 1.3538E+18     | IsMasterProtein | A0A8C4ZAZ4 | Poly(A) polymerase OS=Gadus morhua OX=8049 PE=3 SV=1                                              | 2 | 2 | 2 | 2 | 608  | 68.5  | 8.5  | 4.55 | 2 | 1 |
| -<br>3.814E+18 | IsMasterProtein | A0A8C4ZXV1 | Heparin-binding EGF-like growth factor a OS=Gadus morhua OX=8049 GN=hbegfa PE=4 SV=1              | 7 | 2 | 2 | 2 | 407  | 44.2  | 6.95 | 4.54 | 2 | 1 |
| -<br>8.813E+18 | IsMasterProtein | A0A8C5FXJ8 | Leucine zipper, putative tumor suppressor 1 OS=Gadus morhua OX=8049 GN=lzts1 PE=4 SV=1            | 5 | 2 | 2 | 2 | 641  | 70.3  | 6.61 | 4.54 | 2 | 1 |
| -<br>7.655E+18 | IsMasterProtein | A0A8C5D0P2 | Cyclin E2 OS=Gadus morhua OX=8049 GN=ccne2 PE=3 SV=1                                              | 9 | 2 | 2 | 2 | 387  | 45    | 5.5  | 4.54 | 2 | 1 |
| -<br>6.691E+18 | IsMasterProtein | A0A8C5FCY6 | Arginine--tRNA ligase OS=Gadus morhua OX=8049 GN=RARS2 PE=3 SV=1                                  | 8 | 2 | 2 | 2 | 486  | 55.6  | 7.69 | 4.54 | 2 | 1 |

|                    |                     |                |                                                                                                                                     |   |   |   |   |      |           |      |      |   |   |
|--------------------|---------------------|----------------|-------------------------------------------------------------------------------------------------------------------------------------|---|---|---|---|------|-----------|------|------|---|---|
| -<br>1.856E+1<br>7 | IsMasterProt<br>ein | A0A8C5CZF<br>4 | Ankyrin repeat and LEM domain containing 1 OS=Gadus morhua<br>OX=8049 GN=ankle1 PE=4 SV=1                                           | 2 | 2 | 2 | 2 | 1280 | 138.<br>7 | 5.43 | 4.53 | 2 | 1 |
| -<br>9.078E+1<br>8 | IsMasterProt<br>ein | A0A8C5FPC<br>0 | Neural cell adhesion molecule 1b OS=Gadus morhua OX=8049<br>GN=ncam1b PE=4 SV=1                                                     | 2 | 2 | 2 | 2 | 1280 | 136.<br>7 | 5.02 | 4.53 | 2 | 1 |
| 6.1684E+<br>18     | IsMasterProt<br>ein | A0A8C5BW<br>R5 | Leucine-rich repeat and fibronectin type-III domain-containing protein 2-<br>like OS=Gadus morhua OX=8049 GN=LOC115544341 PE=4 SV=1 | 5 | 2 | 2 | 2 | 788  | 85.9      | 6.42 | 4.53 | 2 | 1 |
| -<br>5.105E+1<br>8 | IsMasterProt<br>ein | A0A8C5AYZ<br>4 | Fork-head domain-containing protein OS=Gadus morhua OX=8049 PE=4<br>SV=1                                                            | 5 | 2 | 2 | 2 | 527  | 58.7      | 6.74 | 4.53 | 2 | 1 |
| -<br>2.239E+1<br>8 | IsMasterProt<br>ein | A0A8C4ZE8<br>4 | WD repeat domain 59 OS=Gadus morhua OX=8049 GN=wdr59 PE=4<br>SV=1                                                                   | 3 | 2 | 2 | 2 | 982  | 110.<br>3 | 7.91 | 4.52 | 2 | 1 |
| -<br>5.925E+1<br>8 | IsMasterProt<br>ein | A0A8C5C627     | Uncharacterized protein OS=Gadus morhua OX=8049 PE=4 SV=1                                                                           | 2 | 2 | 2 | 2 | 717  | 77.1      | 8.22 | 4.52 | 2 | 1 |
| 6.508E+1<br>8      | IsMasterProt<br>ein | A0A8C4ZK7<br>6 | V-type proton ATPase subunit C OS=Gadus morhua OX=8049 PE=3<br>SV=1                                                                 | 4 | 2 | 2 | 2 | 420  | 48.4      | 8.19 | 4.52 | 2 | 1 |
| 2.4216E+<br>18     | IsMasterProt<br>ein | A0A8C5CC4<br>6 | MAM domain-containing protein OS=Gadus morhua OX=8049 PE=4<br>SV=1                                                                  | 3 | 2 | 2 | 2 | 1101 | 118.<br>4 | 7.18 | 4.52 | 2 | 1 |
| -<br>9.126E+1<br>8 | IsMasterProt<br>ein | A0A8C5FKU<br>6 | Extended synaptotagmin-like protein 1a OS=Gadus morhua OX=8049<br>PE=3 SV=1                                                         | 4 | 2 | 2 | 2 | 811  | 90.7      | 8.38 | 4.51 | 2 | 1 |
| 4.8738E+<br>18     | IsMasterProt<br>ein | A0A8C5AP1<br>1 | BEN domain containing 3 OS=Gadus morhua OX=8049 GN=bend3 PE=4<br>SV=1                                                               | 3 | 2 | 2 | 2 | 828  | 94.5      | 5.34 | 4.51 | 2 | 1 |
| -<br>4.948E+1<br>8 | IsMasterProt<br>ein | A0A8C5B5J4     | Drosha ribonuclease III OS=Gadus morhua OX=8049 GN=DROSHA<br>PE=3 SV=1                                                              | 1 | 2 | 2 | 2 | 1212 | 140       | 7.75 | 4.5  | 2 | 1 |
| -<br>7.463E+1<br>8 | IsMasterProt<br>ein | A0A8C5BY2<br>5 | RIMS binding protein 2 OS=Gadus morhua OX=8049 GN=RIMBP2 PE=3<br>SV=1                                                               | 2 | 2 | 2 | 2 | 1193 | 133.<br>2 | 6.02 | 4.5  | 2 | 1 |
| -<br>3.423E+1<br>8 | IsMasterProt<br>ein | A0A8C4Z078     | BICD family like cargo adaptor 2 OS=Gadus morhua OX=8049<br>GN=bicd12 PE=4 SV=1                                                     | 7 | 2 | 2 | 2 | 440  | 50.4      | 5.36 | 4.49 | 2 | 1 |
| 1.4949E+<br>18     | IsMasterProt<br>ein | A0A8C5BTS<br>1 | tRNA-dihydrouridine(47) synthase [NAD(P)(+)] OS=Gadus morhua<br>OX=8049 GN=dus31 PE=3 SV=1                                          | 3 | 2 | 2 | 2 | 640  | 72.7      | 8.09 | 4.47 | 2 | 1 |
| 5.635E+1<br>8      | IsMasterProt<br>ein | A0A8C5C7B<br>2 | RAD54 homolog B OS=Gadus morhua OX=8049 GN=rad54b PE=4 SV=1                                                                         | 3 | 2 | 2 | 2 | 912  | 99.2      | 8.09 | 4.47 | 2 | 1 |
| 4.9197E+<br>17     | IsMasterProt<br>ein | A0A8C4ZNL<br>5 | Uncharacterized protein OS=Gadus morhua OX=8049 PE=4 SV=1                                                                           | 1 | 2 | 2 | 2 | 1754 | 190.<br>4 | 8.19 | 4.45 | 2 | 1 |
| -<br>5.075E+1<br>8 | IsMasterProt<br>ein | A0A8C4Z1J1     | ATP synthase subunit gamma OS=Gadus morhua OX=8049 GN=atp5f1c<br>PE=3 SV=1                                                          | 7 | 2 | 2 | 2 | 289  | 31.7      | 9.32 | 4.44 | 2 | 1 |
| -<br>3.794E+1<br>8 | IsMasterProt<br>ein | A0A8C5FID0     | C2H2-type domain-containing protein OS=Gadus morhua OX=8049 PE=4<br>SV=1                                                            | 4 | 2 | 2 | 2 | 780  | 83.7      | 9.44 | 4.43 | 2 | 1 |
| -<br>2.915E+1<br>7 | IsMasterProt<br>ein | A0A8C5B0V<br>6 | Zgc:158803 OS=Gadus morhua OX=8049 PE=3 SV=1                                                                                        | 4 | 2 | 2 | 2 | 510  | 58.9      | 8.24 | 4.42 | 2 | 1 |
| -<br>7.259E+1<br>8 | IsMasterProt<br>ein | A0A8C5BR2<br>0 | Band 4.1-like protein 1 OS=Gadus morhua OX=8049<br>GN=LOC115557557 PE=4 SV=1                                                        | 2 | 2 | 2 | 2 | 1360 | 150       | 5.58 | 4.42 | 2 | 1 |
| -<br>3.945E+1<br>8 | IsMasterProt<br>ein | A0A8C5C874     | CUB and Sushi multiple domains 3a OS=Gadus morhua OX=8049 PE=4<br>SV=1                                                              | 1 | 2 | 2 | 2 | 3474 | 376.<br>2 | 5.82 | 4.42 | 2 | 1 |

|                |                 |            |                                                                                                                                                            |   |   |   |   |      |       |       |      |   |   |
|----------------|-----------------|------------|------------------------------------------------------------------------------------------------------------------------------------------------------------|---|---|---|---|------|-------|-------|------|---|---|
| -<br>8.105E+18 | IsMasterProtein | A0A8C4Z3S4 | Xylosyltransferase 1 OS=Gadus morhua OX=8049 PE=3 SV=1                                                                                                     | 3 | 2 | 2 | 2 | 881  | 97.2  | 8.65  | 4.42 | 2 | 1 |
| 5.8764E+18     | IsMasterProtein | A0A8C5BWQ4 | 116 kDa U5 small nuclear ribonucleoprotein component OS=Gadus morhua OX=8049 GN=eftud2 PE=3 SV=1                                                           | 2 | 2 | 2 | 2 | 971  | 109.3 | 4.84  | 4.41 | 2 | 1 |
| -<br>4.825E+18 | IsMasterProtein | A0A8C5AHA6 | Nuclear migration protein nudC OS=Gadus morhua OX=8049 GN=nudc PE=3 SV=1                                                                                   | 5 | 2 | 2 | 2 | 345  | 39.4  | 5.67  | 4.4  | 2 | 1 |
| -<br>6.95E+18  | IsMasterProtein | A0A8C5BJS5 | Septin 12 OS=Gadus morhua OX=8049 GN=sept12 PE=3 SV=1                                                                                                      | 3 | 2 | 2 | 2 | 962  | 101.1 | 7.58  | 4.4  | 2 | 1 |
| 5.1495E+17     | IsMasterProtein | A0A8C5FQ99 | Protein-tyrosine-phosphatase OS=Gadus morhua OX=8049 GN=PTPRZ1 PE=3 SV=1                                                                                   | 2 | 2 | 2 | 2 | 1460 | 159.5 | 5.38  | 4.39 | 2 | 1 |
| -<br>9.042E+18 | IsMasterProtein | A0A8C5C0A7 | Dihydrolipoyllysine-residue succinyltransferase component of 2-oxoglutarate dehydrogenase complex, mitochondrial OS=Gadus morhua OX=8049 GN=DLST PE=3 SV=1 | 6 | 2 | 2 | 2 | 375  | 41.6  | 6.57  | 4.38 | 2 | 1 |
| 2.5908E+18     | IsMasterProtein | A0A8C5BW71 | Centrosomal protein of 57 kDa-like OS=Gadus morhua OX=8049 GN=LOC115528945 PE=3 SV=1                                                                       | 9 | 2 | 2 | 2 | 697  | 78.4  | 10.56 | 4.38 | 2 | 1 |
| -<br>3.75E+18  | IsMasterProtein | A0A8C4ZQL9 | Interferon gamma receptor 1-like OS=Gadus morhua OX=8049 GN=ifngr11 PE=4 SV=1                                                                              | 5 | 2 | 2 | 2 | 449  | 48.2  | 5.31  | 4.37 | 2 | 1 |
| -<br>8.046E+18 | IsMasterProtein | A0A8C5FHH5 | Structural maintenance of chromosomes protein 1A OS=Gadus morhua OX=8049 GN=SMC1A PE=3 SV=1                                                                | 3 | 2 | 2 | 2 | 1165 | 134.9 | 7.9   | 4.37 | 2 | 1 |
| 2.2057E+18     | IsMasterProtein | A0A8C4Z3P7 | Family with sequence similarity 50 member A OS=Gadus morhua OX=8049 PE=4 SV=1                                                                              | 7 | 2 | 2 | 2 | 397  | 46    | 6.64  | 4.37 | 2 | 1 |
| -<br>4.15E+18  | IsMasterProtein | A0A8C5B7V8 | Myosin phosphatase Rho interacting protein OS=Gadus morhua OX=8049 GN=si:ch73-103b11.2 PE=4 SV=1                                                           | 1 | 2 | 2 | 2 | 2347 | 263.7 | 5.8   | 4.37 | 2 | 1 |
| -<br>2.611E+18 | IsMasterProtein | A0A8C5B0I7 | Serine protease 23-like OS=Gadus morhua OX=8049 GN=LOC115534576 PE=4 SV=1                                                                                  | 6 | 2 | 2 | 2 | 526  | 57.7  | 9.55  | 4.36 | 2 | 1 |
| -<br>5.019E+18 | IsMasterProtein | A0A8C5BN57 | Tetraspanin OS=Gadus morhua OX=8049 GN=cd63 PE=3 SV=1                                                                                                      | 8 | 2 | 2 | 2 | 271  | 30    | 7.05  | 4.36 | 2 | 1 |
| -<br>7.017E+18 | IsMasterProtein | A0A8C5BX17 | Uncharacterized protein OS=Gadus morhua OX=8049 PE=4 SV=1                                                                                                  | 2 | 2 | 2 | 2 | 1262 | 135.3 | 7.36  | 4.35 | 2 | 1 |
| 3.1908E+18     | IsMasterProtein | A0A8C5FUB5 | RRM domain-containing protein OS=Gadus morhua OX=8049 PE=4 SV=1                                                                                            | 5 | 2 | 2 | 2 | 285  | 32.9  | 12.02 | 4.35 | 2 | 1 |
| 6.3213E+18     | IsMasterProtein | A0A8C4Z2W9 | Bestrophin homolog OS=Gadus morhua OX=8049 PE=3 SV=1                                                                                                       | 8 | 2 | 2 | 2 | 664  | 73.2  | 7.83  | 4.33 | 2 | 1 |
| -<br>4.473E+18 | IsMasterProtein | A0A8C4YV17 | RPGR interacting protein 1 OS=Gadus morhua OX=8049 GN=rpgr11 PE=3 SV=1                                                                                     | 2 | 2 | 2 | 2 | 1400 | 156.9 | 5.45  | 4.33 | 2 | 1 |
| -<br>5.886E+18 | IsMasterProtein | A0A8C5FTH5 | Hypoxanthine phosphoribosyltransferase OS=Gadus morhua OX=8049 PE=3 SV=1                                                                                   | 9 | 2 | 2 | 2 | 217  | 24.7  | 7.85  | 4.33 | 2 | 1 |
| 4.4675E+18     | IsMasterProtein | A0A8C5FTC6 | Ran GTPase activating protein 1 OS=Gadus morhua OX=8049 GN=RANGAP1 PE=4 SV=1                                                                               | 4 | 2 | 2 | 2 | 550  | 59.6  | 4.58  | 4.31 | 2 | 1 |
| 9.7929E+17     | IsMasterProtein | A0A8C5F6W3 | Uncharacterized protein OS=Gadus morhua OX=8049 PE=4 SV=1                                                                                                  | 3 | 2 | 2 | 2 | 663  | 72.2  | 10.04 | 4.31 | 2 | 1 |
| -<br>8.538E+18 | IsMasterProtein | A0A8C4ZZH8 | RNA helicase OS=Gadus morhua OX=8049 GN=ifih1 PE=3 SV=1                                                                                                    | 2 | 2 | 2 | 2 | 971  | 108   | 5.92  | 4.31 | 2 | 1 |
| -<br>9.061E+18 | IsMasterProtein | A0A8C5CT17 | Anoctamin OS=Gadus morhua OX=8049 GN=ano5a PE=3 SV=1                                                                                                       | 4 | 2 | 2 | 2 | 867  | 101.1 | 6.58  | 4.3  | 2 | 1 |



|                |                 |            |                                                                                                               |   |   |   |   |      |       |      |      |   |   |
|----------------|-----------------|------------|---------------------------------------------------------------------------------------------------------------|---|---|---|---|------|-------|------|------|---|---|
| -<br>8.646E+18 | IsMasterProtein | A0A8C5CG22 | Uroporphyrinogen decarboxylase OS=Gadus morhua OX=8049 GN=urod PE=3 SV=1                                      | 6 | 2 | 2 | 2 | 376  | 42.9  | 7.46 | 4.3  | 2 | 1 |
| -<br>4.838E+18 | IsMasterProtein | A0A8C5BT16 | Solute carrier family 23 member 2 OS=Gadus morhua OX=8049 GN=slc23a2 PE=3 SV=1                                | 2 | 2 | 2 | 2 | 743  | 80.7  | 5.8  | 4.3  | 2 | 1 |
| -<br>8.612E+18 | IsMasterProtein | A0A8C5CM55 | 5'-nucleotidase, cytosolic II, like 1 OS=Gadus morhua OX=8049 GN=nt5c211 PE=3 SV=1                            | 4 | 2 | 2 | 2 | 531  | 61.4  | 7.31 | 4.3  | 2 | 1 |
| -<br>6.877E+18 | IsMasterProtein | A0A8C5CEW1 | Lysyl oxidase homolog OS=Gadus morhua OX=8049 PE=3 SV=1                                                       | 3 | 2 | 2 | 2 | 734  | 81.4  | 7.46 | 4.3  | 2 | 1 |
| -<br>5.865E+18 | IsMasterProtein | A0A8C4ZTI3 | Collagen, type V, alpha 2a OS=Gadus morhua OX=8049 GN=col5a2a PE=4 SV=1                                       | 2 | 2 | 2 | 2 | 1497 | 144.1 | 7.09 | 4.28 | 2 | 1 |
| -<br>3.958E+18 | IsMasterProtein | A0A8C5AVH0 | Non-specific serine/threonine protein kinase OS=Gadus morhua OX=8049 GN=pak1 PE=3 SV=1                        | 4 | 2 | 2 | 2 | 478  | 53.7  | 7.69 | 4.28 | 2 | 1 |
| 8.4239E+18     | IsMasterProtein | A0A8C5B9Q9 | Eukaryotic translation initiation factor 3 subunit E OS=Gadus morhua OX=8049 GN=eif3eb PE=3 SV=1              | 4 | 2 | 2 | 2 | 405  | 47.8  | 7.44 | 4.27 | 2 | 1 |
| -<br>5.417E+18 | IsMasterProtein | A0A8C4ZVQ0 | Uncharacterized protein OS=Gadus morhua OX=8049 PE=4 SV=1                                                     | 8 | 2 | 2 | 2 | 424  | 40.1  | 9.1  | 4.27 | 2 | 1 |
| -<br>9.22E+18  | IsMasterProtein | A0A8C5A430 | Vinculin OS=Gadus morhua OX=8049 PE=3 SV=1                                                                    | 2 | 2 | 2 | 2 | 1100 | 120   | 5.77 | 4.27 | 2 | 1 |
| -<br>1.868E+18 | IsMasterProtein | A0A8C5FTJ4 | Family with sequence similarity 120A OS=Gadus morhua OX=8049 PE=3 SV=1                                        | 4 | 2 | 2 | 2 | 930  | 101.8 | 9.26 | 4.27 | 2 | 1 |
| -<br>4.803E+18 | IsMasterProtein | A0A8C5C815 | Family with sequence similarity 98 member A OS=Gadus morhua OX=8049 GN=fam98a PE=3 SV=1                       | 5 | 2 | 2 | 2 | 530  | 55.5  | 9.03 | 4.27 | 2 | 1 |
| 3.8203E+18     | IsMasterProtein | A0A8C4YX10 | Connector enhancer of kinase suppressor of Ras 1 OS=Gadus morhua OX=8049 GN=enksr1 PE=3 SV=1                  | 3 | 2 | 2 | 2 | 855  | 94.2  | 5.49 | 4.26 | 2 | 1 |
| -<br>4.686E+18 | IsMasterProtein | A0A8C5C5N2 | Uncharacterized protein OS=Gadus morhua OX=8049 PE=4 SV=1                                                     | 2 | 2 | 2 | 2 | 1226 | 133.3 | 5.57 | 4.26 | 2 | 1 |
| -<br>3.534E+18 | IsMasterProtein | A0A8C5BV75 | 26S proteasome non-ATPase regulatory subunit 6 OS=Gadus morhua OX=8049 GN=psmd6 PE=3 SV=1                     | 7 | 2 | 2 | 2 | 379  | 44.3  | 6.04 | 4.25 | 2 | 1 |
| 4.3957E+18     | IsMasterProtein | A0A8C5FLK5 | CWC15 spliceosome associated protein homolog OS=Gadus morhua OX=8049 GN=cwc15 PE=3 SV=1                       | 7 | 2 | 2 | 2 | 244  | 28    | 5.47 | 4.24 | 2 | 1 |
| 7.5621E+18     | IsMasterProtein | A0A8C5CM13 | Uncharacterized LOC115548709 OS=Gadus morhua OX=8049 GN=LOC115548709 PE=4 SV=1                                | 1 | 2 | 2 | 2 | 1376 | 150.9 | 5.2  | 4.24 | 2 | 1 |
| -<br>4.026E+17 | IsMasterProtein | A0A8C4ZM61 | VPS8 subunit of CORVET complex OS=Gadus morhua OX=8049 PE=3 SV=1                                              | 2 | 2 | 2 | 2 | 1255 | 140.7 | 6.46 | 4.23 | 2 | 1 |
| -<br>5.75E+18  | IsMasterProtein | A0A8C4ZF52 | Minichromosome maintenance complex component 3 associated protein OS=Gadus morhua OX=8049 GN=mcm3ap PE=4 SV=1 | 2 | 2 | 2 | 2 | 2153 | 234.9 | 6.52 | 4.23 | 2 | 1 |
| -5.5E+18       | IsMasterProtein | A0A8C5ADX6 | Thioredoxin like and DUF547 domain-containing protein OS=Gadus morhua OX=8049 GN=zgc:152951 PE=4 SV=1         | 5 | 2 | 2 | 2 | 374  | 41.7  | 5.86 | 4.23 | 2 | 1 |
| 8.8704E+18     | IsMasterProtein | A0A8C5AZA3 | Inner centromere protein OS=Gadus morhua OX=8049 GN=incenp PE=3 SV=1                                          | 2 | 2 | 2 | 2 | 840  | 95.4  | 9.5  | 4.22 | 2 | 1 |
| 3.1458E+18     | IsMasterProtein | A0A8C4Z6E7 | Calcium load-activated calcium channel OS=Gadus morhua OX=8049 GN=tmco1 PE=3 SV=1                             | 7 | 2 | 2 | 2 | 188  | 21.3  | 9.74 | 4.22 | 2 | 1 |
| -<br>7.01E+18  | IsMasterProtein | A0A8C5FH88 | Phosphatase and actin regulator 4 OS=Gadus morhua OX=8049 GN=phactr4b PE=3 SV=1                               | 4 | 2 | 2 | 2 | 900  | 98.6  | 6.39 | 4.22 | 2 | 1 |

|                |                 |            |                                                                                                |    |   |   |   |      |       |       |      |   |   |
|----------------|-----------------|------------|------------------------------------------------------------------------------------------------|----|---|---|---|------|-------|-------|------|---|---|
| -<br>6.706E+18 | IsMasterProtein | A0A8C5CG50 | Uncharacterized protein OS=Gadus morhua OX=8049 PE=4 SV=1                                      | 6  | 2 | 2 | 2 | 330  | 37.1  | 9.5   | 4.21 | 2 | 1 |
| -<br>6.814E+18 | IsMasterProtein | A0A8C4ZC45 | Nucleoprotein TPR OS=Gadus morhua OX=8049 GN=tprib PE=3 SV=1                                   | 1  | 2 | 2 | 2 | 2329 | 260.3 | 4.92  | 4.21 | 2 | 1 |
| 5.0028E+18     | IsMasterProtein | A0A8C5FRI6 | Ankyrin repeat domain 50 OS=Gadus morhua OX=8049 GN=ANKRD50 PE=4 SV=1                          | 2  | 2 | 2 | 2 | 1422 | 154.5 | 6.76  | 4.19 | 2 | 1 |
| 4.7399E+18     | IsMasterProtein | A0A8C4YUK5 | PEST proteolytic signal-containing nuclear protein OS=Gadus morhua OX=8049 GN=pcnp PE=4 SV=1   | 14 | 2 | 2 | 2 | 173  | 18.6  | 8.7   | 4.18 | 2 | 1 |
| -<br>4.234E+18 | IsMasterProtein | A0A8C5AW89 | Inositol-polyphosphate 5-phosphatase OS=Gadus morhua OX=8049 PE=3 SV=1                         | 3  | 2 | 2 | 2 | 468  | 52.7  | 6.25  | 4.18 | 2 | 1 |
| 7.2338E+18     | IsMasterProtein | A0A8C4ZZM4 | La ribonucleoprotein 6, translational regulator a OS=Gadus morhua OX=8049 PE=4 SV=1            | 4  | 2 | 2 | 2 | 489  | 52.7  | 8.47  | 4.18 | 2 | 1 |
| -<br>6.711E+18 | IsMasterProtein | A0A8C4YZM7 | Rab3 GTPase-activating protein catalytic subunit OS=Gadus morhua OX=8049 GN=rab3gap1 PE=3 SV=1 | 3  | 2 | 2 | 2 | 970  | 107.5 | 5.5   | 4.15 | 2 | 1 |
| -<br>2.819E+18 | IsMasterProtein | A0A8C5CGZ4 | G patch domain containing 4 OS=Gadus morhua OX=8049 GN=gpatch4 PE=4 SV=1                       | 6  | 2 | 2 | 2 | 496  | 56.4  | 8.69  | 4.15 | 2 | 1 |
| -<br>3.906E+18 | IsMasterProtein | A0A8C5A6M7 | 40S ribosomal protein S25 OS=Gadus morhua OX=8049 GN=RPS25 PE=3 SV=1                           | 13 | 2 | 2 | 2 | 136  | 15.6  | 10.23 | 4.15 | 2 | 1 |
| -<br>2.587E+18 | IsMasterProtein | A0A8C5C5J9 | Cleavage stimulation factor, 3' pre-RNA, subunit 3 OS=Gadus morhua OX=8049 GN=cstf3 PE=4 SV=1  | 4  | 2 | 2 | 2 | 734  | 84.4  | 8.21  | 4.14 | 2 | 1 |
| 5.4709E+16     | IsMasterProtein | A0A8C5A191 | SH3 domain and tetratricopeptide repeats 1 OS=Gadus morhua OX=8049 GN=SH3TC1 PE=4 SV=1         | 3  | 2 | 2 | 2 | 1347 | 148.5 | 6.07  | 4.14 | 2 | 1 |
| 3.8472E+18     | IsMasterProtein | A0A8C5FGW6 | Uncharacterized LOC115542966 OS=Gadus morhua OX=8049 GN=LOC115542966 PE=4 SV=1                 | 1  | 2 | 2 | 2 | 2341 | 253.8 | 7.03  | 4.14 | 2 | 1 |
| 3.6208E+18     | IsMasterProtein | A0A8C5CV46 | Glycerol-3-phosphate dehydrogenase [NAD(+)] OS=Gadus morhua OX=8049 PE=3 SV=1                  | 5  | 2 | 2 | 2 | 321  | 34.9  | 6.44  | 4.13 | 2 | 1 |
| -<br>2.242E+18 | IsMasterProtein | A0A8C5AHC8 | Uncharacterized protein OS=Gadus morhua OX=8049 PE=4 SV=1                                      | 1  | 2 | 2 | 2 | 4449 | 481.8 | 7.42  | 4.12 | 2 | 1 |
| -<br>7.708E+18 | IsMasterProtein | A0A8C5FKA4 | Polyhomeotic-like protein 2 OS=Gadus morhua OX=8049 GN=LOC115556800 PE=4 SV=1                  | 2  | 2 | 2 | 2 | 974  | 102.7 | 9.44  | 4.12 | 2 | 1 |
| -<br>7.399E+18 | IsMasterProtein | A0A8C5F860 | Desmoglein 2, tandem duplicate 1 OS=Gadus morhua OX=8049 GN=DSG2 PE=4 SV=1                     | 3  | 2 | 2 | 2 | 1216 | 129.1 | 5.11  | 4.11 | 2 | 1 |
| -<br>2.924E+18 | IsMasterProtein | A0A8C5C7E5 | Myosin_tail_1 domain-containing protein OS=Gadus morhua OX=8049 PE=4 SV=1                      | 2  | 2 | 2 | 2 | 856  | 95.8  | 6.19  | 4.1  | 2 | 1 |
| -<br>3.374E+18 | IsMasterProtein | A0A8C5BR63 | Protein phosphatase 1 regulatory subunit OS=Gadus morhua OX=8049 GN=zmp:0000001167 PE=4 SV=1   | 2  | 2 | 2 | 2 | 957  | 105.2 | 6.55  | 4.1  | 2 | 1 |
| -<br>7.652E+18 | IsMasterProtein | A0A8C5C5P5 | Uncharacterized protein OS=Gadus morhua OX=8049 PE=3 SV=1                                      | 6  | 2 | 2 | 2 | 483  | 51.8  | 4.98  | 4.09 | 2 | 1 |
| -<br>4.171E+17 | IsMasterProtein | A0A8C4Z7D9 | Uridine 5'-monophosphate synthase OS=Gadus morhua OX=8049 GN=umps PE=3 SV=1                    | 5  | 2 | 2 | 2 | 484  | 52.5  | 7.39  | 4.09 | 2 | 1 |
| -<br>8.18E+18  | IsMasterProtein | A0A8C5AHB7 | Uncharacterized LOC115561724 OS=Gadus morhua OX=8049 GN=zgc:112083 PE=4 SV=1                   | 4  | 2 | 2 | 2 | 542  | 61.4  | 6.77  | 4.09 | 2 | 1 |

|            |                 |            |                                                                               |   |   |   |   |      |       |       |      |   |   |
|------------|-----------------|------------|-------------------------------------------------------------------------------|---|---|---|---|------|-------|-------|------|---|---|
| -4.2E+18   | IsMasterProtein | A0A8C5FJ12 | TAR DNA-binding protein 43 OS=Gadus morhua OX=8049 GN=tardbpl PE=4 SV=1       | 7 | 2 | 2 | 2 | 307  | 34.6  | 6.28  | 4.08 | 2 | 1 |
| 3.9867E+18 | IsMasterProtein | A0A8C4Z571 | Glucosamine-6-phosphate isomerase OS=Gadus morhua OX=8049 GN=gnpda1 PE=3 SV=1 | 8 | 2 | 2 | 2 | 276  | 31    | 6.8   | 4.07 | 2 | 1 |
| 1.8835E+18 | IsMasterProtein | A0A8C4ZA92 | RIB43A domain with coiled-coils 1 OS=Gadus morhua OX=8049 GN=RIBC1 PE=3 SV=1  | 4 | 2 | 2 | 2 | 367  | 43.2  | 5.66  | 4.06 | 2 | 1 |
| -6.412E+18 | IsMasterProtein | A0A8C5BYQ6 | Coiled-coil alpha-helical rod protein 1 OS=Gadus morhua OX=8049 PE=4 SV=1     | 5 | 2 | 2 | 2 | 629  | 71    | 7.23  | 4.06 | 2 | 1 |
| -9.069E+18 | IsMasterProtein | A0A8C5B3Y9 | Peptidylprolyl isomerase G OS=Gadus morhua OX=8049 GN=PPIG PE=4 SV=1          | 3 | 2 | 2 | 2 | 698  | 79.4  | 10.43 | 4.05 | 2 | 1 |
| 3.6162E+18 | IsMasterProtein | A0A8C5AE05 | Importin subunit alpha OS=Gadus morhua OX=8049 GN=kpna1 PE=3 SV=1             | 6 | 2 | 2 | 2 | 544  | 60.3  | 5.26  | 4.05 | 2 | 1 |
| -1.766E+16 | IsMasterProtein | A0A8C5CD61 | Med12 domain-containing protein OS=Gadus morhua OX=8049 PE=3 SV=1             | 1 | 2 | 2 | 2 | 2014 | 225.5 | 7.56  | 4.04 | 2 | 1 |
| 7.5086E+17 | IsMasterProtein | A0A8C5B9H4 | GLIS family zinc finger 1b OS=Gadus morhua OX=8049 PE=3 SV=1                  | 2 | 2 | 2 | 2 | 1045 | 110.4 | 7.83  | 4.03 | 2 | 1 |

PI: Isoelectric point

Aas: Amino acids

Table S3. The full list of the 302 most abundant proteins identified from male Atlantic Cod (*Gadus morhua*)

| Accession  | Description                                                                               | Sequence coverage | psms * |
|------------|-------------------------------------------------------------------------------------------|-------------------|--------|
| A0A8C5C226 | Keratin, type I cytoskeletal 13-like OS=Gadus morhua OX=8049 GN=LOC115534825 PE=4 SV=1    | 40                | 24     |
| A0A8C4ZFJ9 | Keratin, type I cytoskeletal 13-like OS=Gadus morhua OX=8049 GN=LOC115534848 PE=4 SV=1    | 21                | 11     |
| A0A8C4YVX1 | Keratin, type I cytoskeletal 18-like OS=Gadus morhua OX=8049 GN=LOC115539991 PE=3 SV=1    | 82                | 40     |
| A0A8C4ZLA0 | 60S acidic ribosomal protein P2 OS=Gadus morhua OX=8049 GN=rplp2 PE=3 SV=1                | 74                | 7      |
| A0A8C4ZT25 | 60S acidic ribosomal protein P2 OS=Gadus morhua OX=8049 PE=3 SV=1                         | 28                | 2      |
| A0A8C4Z4T9 | 60S ribosomal protein L12 OS=Gadus morhua OX=8049 PE=3 SV=1                               | 21                | 2      |
| A0A8C4ZK93 | 60S ribosomal protein L14 OS=Gadus morhua OX=8049 GN=rpl14 PE=3 SV=1                      | 25                | 3      |
| A0A8C5F6E6 | 60S ribosomal protein L27 OS=Gadus morhua OX=8049 GN=rpl27 PE=3 SV=1                      | 43                | 6      |
| A0A8C4Z3G5 | 60S ribosomal protein L27a OS=Gadus morhua OX=8049 GN=rpl27a PE=3 SV=1                    | 28                | 2      |
| A0A8C5F6P1 | 60S ribosomal protein L34 OS=Gadus morhua OX=8049 GN=RPL34 PE=3 SV=1                      | 28                | 4      |
| A0A8C5BI74 | 60S ribosomal protein L7a OS=Gadus morhua OX=8049 GN=rpl7a PE=3 SV=1                      | 22                | 8      |
| A0A8C5CMP3 | 60S ribosomal protein L8 OS=Gadus morhua OX=8049 GN=rpl8 PE=3 SV=1                        | 23                | 4      |
| A0A8C4Z154 | ATP synthase-coupling factor 6, mitochondrial OS=Gadus morhua OX=8049 GN=atp5pf PE=3 SV=1 | 25                | 3      |
| A0A8C4ZPT6 | ATP synthase subunit OS=Gadus morhua OX=8049 GN=atp51 PE=3 SV=1                           | 22                | 2      |
| A0A8C5AGK0 | ATP synthase subunit alpha OS=Gadus morhua OX=8049 GN=atp5fa1 PE=3 SV=1                   | 41                | 31     |
| A0A8C4Z1Z7 | ATP synthase subunit b OS=Gadus morhua OX=8049 GN=atp5pb PE=3 SV=1                        | 37                | 13     |
| A0A8C4YZ60 | ATP synthase subunit beta OS=Gadus morhua OX=8049 GN=LOC115533330 PE=3 SV=1               | 57                | 52     |
| A0A8C4ZKE9 | ATP synthase subunit d, mitochondrial OS=Gadus morhua OX=8049 GN=atp5pd PE=3 SV=1         | 23                | 3      |
| A0A8C5FSE6 | ATP synthase subunit e, mitochondrial OS=Gadus morhua OX=8049 GN=atp5me PE=3 SV=1         | 30                | 2      |
| A0A8C5F8Y0 | ATP synthase subunit O, mitochondrial OS=Gadus morhua OX=8049 PE=3 SV=1                   | 33                | 7      |
| A0A8C5B4I7 | Protein AMBP OS=Gadus morhua OX=8049 GN=LOC115538969 PE=3 SV=1                            | 26                | 8      |
| A0A8C5CLM6 | Protein disulfide-isomerase OS=Gadus morhua OX=8049 GN=pdia4 PE=3 SV=1                    | 23                | 13     |
| A0A8C5B0S5 | Protein disulfide-isomerase OS=Gadus morhua OX=8049 PE=3 SV=1                             | 43                | 26     |
| A0A8C5FBY0 | Protein disulfide-isomerase OS=Gadus morhua OX=8049 GN=pdia3 PE=3 SV=1                    | 43                | 29     |

|                   |                                                                                                  |    |    |
|-------------------|--------------------------------------------------------------------------------------------------|----|----|
| <b>A0A8C4ZX28</b> | Protein disulfide-isomerase A6 OS=Gadus morhua OX=8049<br>GN=pdia6 PE=3 SV=1                     | 24 | 9  |
| <b>A0A8C4ZCP9</b> | Protein S100 OS=Gadus morhua OX=8049 PE=3 SV=1                                                   | 42 | 15 |
| <b>A0A8C5AZX1</b> | Protein S100 OS=Gadus morhua OX=8049 GN=s100a10a<br>PE=3 SV=1                                    | 25 | 4  |
| <b>A0A8C4Z902</b> | Protein Z-dependent protease inhibitor-like OS=Gadus morhua<br>OX=8049 GN=LOC115534600 PE=3 SV=1 | 45 | 26 |
| <b>A0A8C4ZUE8</b> | 40S ribosomal protein S12 OS=Gadus morhua OX=8049<br>GN=rps12 PE=3 SV=1                          | 35 | 3  |
| <b>A0A8C4ZAR8</b> | 40S ribosomal protein S15 OS=Gadus morhua OX=8049<br>GN=rps15 PE=3 SV=1                          | 23 | 2  |
| <b>A0A8C5BT07</b> | 40S ribosomal protein S18 OS=Gadus morhua OX=8049<br>GN=rps18 PE=3 SV=1                          | 34 | 7  |
| <b>A0A8C5BF41</b> | 40S ribosomal protein S19 OS=Gadus morhua OX=8049<br>PE=3 SV=1                                   | 36 | 6  |
| <b>A0A8C4ZM80</b> | 40S ribosomal protein S23 OS=Gadus morhua OX=8049<br>GN=rps23 PE=3 SV=1                          | 21 | 3  |
| <b>A0A8C4YW06</b> | 40S ribosomal protein S3a OS=Gadus morhua OX=8049<br>GN=rps3a PE=3 SV=1                          | 27 | 8  |
| <b>A0A8C5F524</b> | 40S ribosomal protein S9 OS=Gadus morhua OX=8049<br>GN=rps9 PE=3 SV=1                            | 31 | 6  |
| <b>A0A8C5CJ33</b> | Ig-like domain-containing protein OS=Gadus morhua<br>OX=8049 PE=3 SV=1                           | 25 | 17 |
| <b>A0A8C5BPZ1</b> | Ig-like domain-containing protein OS=Gadus morhua<br>OX=8049 PE=4 SV=1                           | 32 | 4  |
| <b>A0A8C5FFD8</b> | Ig-like domain-containing protein OS=Gadus morhua<br>OX=8049 PE=4 SV=1                           | 34 | 3  |
| <b>A0A8C4YVN4</b> | Ig-like domain-containing protein OS=Gadus morhua<br>OX=8049 PE=4 SV=1                           | 34 | 5  |
| <b>A0A8C5BG64</b> | Ig-like domain-containing protein OS=Gadus morhua<br>OX=8049 PE=4 SV=1                           | 62 | 4  |
| <b>A0A8C5BCU3</b> | Ig-like domain-containing protein OS=Gadus morhua<br>OX=8049 PE=4 SV=1                           | 28 | 3  |
| <b>A0A8C5BN10</b> | Ig-like domain-containing protein OS=Gadus morhua<br>OX=8049 PE=4 SV=1                           | 31 | 2  |
| <b>A0A8C5BEP0</b> | Tubulin alpha-1A chain OS=Gadus morhua OX=8049<br>GN=LOC115547025 PE=3 SV=1                      | 48 | 45 |
| <b>A0A8C5AZ29</b> | Tubulin alpha chain OS=Gadus morhua OX=8049<br>GN=LOC115559022 PE=3 SV=1                         | 41 | 55 |
| <b>A0A8C5FSR6</b> | Tubulin alpha chain OS=Gadus morhua OX=8049<br>GN=LOC115533128 PE=3 SV=1                         | 47 | 54 |
| <b>A0A8C4Z3X3</b> | Tubulin beta chain OS=Gadus morhua OX=8049 GN=tubb2b<br>PE=3 SV=1                                | 55 | 73 |
| <b>A0A8C5ATU6</b> | Tubulin beta chain OS=Gadus morhua OX=8049 PE=3 SV=1                                             | 47 | 19 |
| <b>A0A8C4Z8U4</b> | Tubulin beta chain OS=Gadus morhua OX=8049 GN=tubb6<br>PE=3 SV=1                                 | 55 | 45 |
| <b>A0A8C4ZP37</b> | Tubulin beta chain OS=Gadus morhua OX=8049 GN=tubb5<br>PE=3 SV=1                                 | 63 | 83 |
| <b>B8XJS4</b>     | Hemoglobin alpha 1 OS=Gadus morhua OX=8049 GN=HbA1<br>PE=2 SV=1                                  | 57 | 41 |
| <b>B3F9E2</b>     | Hemoglobin alpha chain OS=Gadus morhua OX=8049 PE=3<br>SV=1                                      | 66 | 70 |
| <b>C8YNQ4</b>     | Hemoglobin beta 1 OS=Gadus morhua OX=8049 GN=HbB1<br>PE=3 SV=1                                   | 81 | 40 |

|                   |                                                                                                                            |    |     |
|-------------------|----------------------------------------------------------------------------------------------------------------------------|----|-----|
| <b>B8XJS7</b>     | Hemoglobin beta 2 OS=Gadus morhua OX=8049<br>GN=LOC115530778 PE=2 SV=1                                                     | 88 | 120 |
| <b>C8YNR1</b>     | Hemoglobin beta 3 OS=Gadus morhua OX=8049 GN=HbB3<br>PE=3 SV=1                                                             | 74 | 63  |
| <b>B3F9U6</b>     | Hemoglobin beta chain OS=Gadus morhua OX=8049 PE=3<br>SV=1                                                                 | 73 | 63  |
| <b>A0A8C5FNK1</b> | Apolipoprotein A-Ia OS=Gadus morhua OX=8049<br>GN=apoa1a PE=3 SV=1                                                         | 42 | 12  |
| <b>A0A8C5A7M9</b> | Apolipoprotein A-II OS=Gadus morhua OX=8049 GN=apoa2<br>PE=4 SV=1                                                          | 66 | 24  |
| <b>A0A8C5FHR5</b> | Apolipoprotein A-IV-like OS=Gadus morhua OX=8049<br>GN=LOC115535852 PE=3 SV=1                                              | 67 | 24  |
| <b>A0A8C4ZHM4</b> | Apolipoprotein C-I OS=Gadus morhua OX=8049 GN=apoc1<br>PE=3 SV=1                                                           | 27 | 3   |
| <b>A0A8C4ZH36</b> | Apolipoprotein Eb OS=Gadus morhua OX=8049 GN=apoeb<br>PE=3 SV=1                                                            | 77 | 36  |
| <b>A0A8C5C7W7</b> | Cytochrome b-c1 complex subunit 2, mitochondrial<br>OS=Gadus morhua OX=8049 GN=LOC115530818 PE=4<br>SV=1                   | 21 | 9   |
| <b>A0A8C4ZDC3</b> | Cytochrome b-c1 complex subunit 7 OS=Gadus morhua<br>OX=8049 GN=LOC115535545 PE=3 SV=1                                     | 39 | 2   |
| <b>A0A8C4ZGK7</b> | Cytochrome c oxidase assembly protein COX18,<br>mitochondrial OS=Gadus morhua OX=8049 GN=igfbp7 PE=4<br>SV=1               | 26 | 6   |
| <b>A0A8C5F4J1</b> | Cytochrome c oxidase subunit OS=Gadus morhua OX=8049<br>GN=LOC115553495 PE=3 SV=1                                          | 36 | 7   |
| <b>A0A8C4Z0L1</b> | Cytochrome c oxidase subunit 4 OS=Gadus morhua OX=8049<br>GN=LOC115558779 PE=3 SV=1                                        | 31 | 5   |
| <b>A0A8C5ARR7</b> | Ribosomal protein OS=Gadus morhua OX=8049 GN=rpl10a<br>PE=3 SV=1                                                           | 33 | 6   |
| <b>A0A8C5FD21</b> | Ribosomal protein L4 OS=Gadus morhua OX=8049 GN=rpl4<br>PE=3 SV=1                                                          | 21 | 7   |
| <b>A0A8C4Z4U8</b> | Ribosomal protein L7 OS=Gadus morhua OX=8049<br>GN=RPL7 PE=3 SV=1                                                          | 21 | 4   |
| <b>A0A8C4ZSJ7</b> | Ribosomal protein S4 X-linked OS=Gadus morhua OX=8049<br>PE=3 SV=1                                                         | 26 | 7   |
| <b>A0A8C4ZNJ6</b> | Ribosomal protein, large, P0 OS=Gadus morhua OX=8049<br>GN=rplp0 PE=3 SV=1                                                 | 36 | 9   |
| <b>A0A8C4ZKN5</b> | Acidic (leucine-rich) nuclear phosphoprotein 32 family,<br>member A OS=Gadus morhua OX=8049 GN=anp32a PE=3<br>SV=1         | 27 | 9   |
| <b>A0A8C5F8Z6</b> | Acidic (leucine-rich) nuclear phosphoprotein 32 family,<br>member B OS=Gadus morhua OX=8049 GN=anp32b PE=3<br>SV=1         | 30 | 11  |
| <b>A0A8C4Z0E3</b> | Acidic leucine-rich nuclear phosphoprotein 32 family member<br>D-like OS=Gadus morhua OX=8049 GN=LOC115529167<br>PE=3 SV=1 | 28 | 9   |
| <b>A0A8C5BRD9</b> | Clathrin heavy chain OS=Gadus morhua OX=8049<br>GN=LOC115561405 PE=3 SV=1                                                  | 24 | 34  |
| <b>A0A8C5FF90</b> | Clathrin heavy chain OS=Gadus morhua OX=8049 PE=3<br>SV=1                                                                  | 29 | 46  |
| <b>A0A8C5ATB3</b> | Clathrin light chain OS=Gadus morhua OX=8049 GN=clta<br>PE=3 SV=1                                                          | 22 | 3   |
| <b>A0A8C4ZAY7</b> | Fibrinogen beta chain OS=Gadus morhua OX=8049 GN=fgb<br>PE=4 SV=1                                                          | 40 | 26  |

|                   |                                                                                                                  |    |    |
|-------------------|------------------------------------------------------------------------------------------------------------------|----|----|
| <b>A0A8C5F4R5</b> | Fibrinogen C-terminal domain-containing protein OS=Gadus morhua OX=8049 PE=4 SV=1                                | 25 | 8  |
| <b>A0A8C4YWD2</b> | Fibrinogen gamma chain OS=Gadus morhua OX=8049 GN=fgg PE=4 SV=1                                                  | 55 | 39 |
| <b>A0A8C5BBM7</b> | Heat shock cognate 70 kDa protein OS=Gadus morhua OX=8049 GN=LOC115546994 PE=3 SV=1                              | 41 | 36 |
| <b>A0A8C5FKJ8</b> | Heat shock protein 90, alpha (cytosolic), class A member 1, tandem duplicate 2 OS=Gadus morhua OX=8049 PE=3 SV=1 | 22 | 18 |
| <b>A0A8C4ZI26</b> | Heat shock protein 90, alpha (cytosolic), class A member 1, tandem duplicate 2 OS=Gadus morhua OX=8049 PE=3 SV=1 | 38 | 31 |
| <b>A0A8C4ZTE5</b> | High mobility group-T protein-like OS=Gadus morhua OX=8049 GN=LOC115561521 PE=3 SV=1                             | 34 | 5  |
| <b>A0A8C5FTZ2</b> | High mobility group box 1 OS=Gadus morhua OX=8049 PE=3 SV=1                                                      | 27 | 8  |
| <b>A0A8C4ZQW9</b> | High mobility group box 2a OS=Gadus morhua OX=8049 GN=hmg2a PE=4 SV=1                                            | 27 | 8  |
| <b>A0A8C5FQN1</b> | Histone H2A OS=Gadus morhua OX=8049 PE=3 SV=1                                                                    | 39 | 6  |
| <b>A0A8C5FAA0</b> | Histone H2B OS=Gadus morhua OX=8049 GN=H2BE1 PE=3 SV=1                                                           | 39 | 5  |
| <b>A0A8C5B042</b> | Histone H4 OS=Gadus morhua OX=8049 PE=3 SV=1                                                                     | 49 | 9  |
| <b>A0A8C5B373</b> | Keratin 8 OS=Gadus morhua OX=8049 PE=3 SV=1                                                                      | 48 | 56 |
| <b>A0A8C4YSX2</b> | Keratin 8 OS=Gadus morhua OX=8049 PE=3 SV=1                                                                      | 47 | 71 |
| <b>A0A8C5B602</b> | Keratin 94 OS=Gadus morhua OX=8049 PE=3 SV=1                                                                     | 57 | 44 |
| <b>A0A8C4ZXA3</b> | Peptidyl-prolyl cis-trans isomerase OS=Gadus morhua OX=8049 GN=LOC115531931 PE=3 SV=1                            | 38 | 10 |
| <b>A0A8C4ZFZ2</b> | Peptidyl-prolyl cis-trans isomerase OS=Gadus morhua OX=8049 GN=LOC115545253 PE=3 SV=1                            | 27 | 5  |
| <b>A0A8C4Z706</b> | Peptidyl-prolyl cis-trans isomerase OS=Gadus morhua OX=8049 GN=pin1 PE=4 SV=1                                    | 28 | 2  |
| <b>A0A8C5AT89</b> | SERPIN domain-containing protein OS=Gadus morhua OX=8049 PE=3 SV=1                                               | 42 | 45 |
| <b>A0A8C5BQI6</b> | SERPIN domain-containing protein OS=Gadus morhua OX=8049 PE=3 SV=1                                               | 34 | 17 |
| <b>A0A8C5D2V1</b> | SERPIN domain-containing protein OS=Gadus morhua OX=8049 PE=3 SV=1                                               | 44 | 59 |
| <b>A0A8C4Z4K1</b> | Sodium/potassium-transporting ATPase subunit alpha OS=Gadus morhua OX=8049 GN=atp1a1a.1 PE=3 SV=1                | 30 | 39 |
| <b>A0A8C5ASM5</b> | Sodium/potassium-transporting ATPase subunit alpha OS=Gadus morhua OX=8049 GN=atp1a3b PE=3 SV=1                  | 29 | 38 |
| <b>A0A8C5AKI2</b> | Sodium/potassium-transporting ATPase subunit beta OS=Gadus morhua OX=8049 GN=atp1b1b PE=3 SV=1                   | 42 | 21 |
| <b>A0A8C5ADH8</b> | Aconitate hydratase, mitochondrial OS=Gadus morhua OX=8049 GN=ACO2 PE=3 SV=1                                     | 33 | 21 |
| <b>A0A8C5FBY3</b> | Aconitate hydratase, mitochondrial OS=Gadus morhua OX=8049 PE=3 SV=1                                             | 21 | 13 |
| <b>A0A8C5AWI2</b> | Actin, alpha cardiac OS=Gadus morhua OX=8049 GN=LOC115544317 PE=3 SV=1                                           | 34 | 18 |
| <b>A0A8C5FJI3</b> | Actin, beta 1 OS=Gadus morhua OX=8049 PE=3 SV=1                                                                  | 53 | 24 |
| <b>A0A8C4ZGV9</b> | Calreticulin OS=Gadus morhua OX=8049 PE=3 SV=1                                                                   | 27 | 8  |
| <b>A0A8C5F686</b> | Calreticulin OS=Gadus morhua OX=8049 PE=3 SV=1                                                                   | 30 | 14 |
| <b>A0A8C5C8Y3</b> | Casein kinase II subunit alpha-like OS=Gadus morhua OX=8049 GN=LOC115545522 PE=3 SV=1                            | 22 | 6  |



|                   |                                                                                                               |    |    |
|-------------------|---------------------------------------------------------------------------------------------------------------|----|----|
| <b>A0A8C5FKG2</b> | Casein kinase II subunit beta OS=Gadus morhua OX=8049<br>GN=csnk2b PE=3 SV=1                                  | 23 | 2  |
| <b>A0A8C5CWW4</b> | Dynein light chain OS=Gadus morhua OX=8049 GN=dyndl2a<br>PE=3 SV=1                                            | 38 | 2  |
| <b>A0A8C4ZFD7</b> | Dynein light chain roadblock OS=Gadus morhua OX=8049<br>PE=3 SV=1                                             | 43 | 2  |
| <b>A8CZC9</b>     | Elongation factor 1-alpha OS=Gadus morhua OX=8049 PE=2<br>SV=1                                                | 28 | 17 |
| <b>A0A8C4ZJE4</b> | Elongation factor 1-beta OS=Gadus morhua OX=8049<br>GN=eef1b2 PE=3 SV=1                                       | 32 | 5  |
| <b>A0A8C5B9Q5</b> | Eukaryotic translation initiation factor 4A1A OS=Gadus<br>morhua OX=8049 GN=eif4a1a PE=3 SV=1                 | 35 | 12 |
| <b>A0A8C5FNL2</b> | Eukaryotic translation initiation factor 4H OS=Gadus morhua<br>OX=8049 PE=4 SV=1                              | 29 | 4  |
| <b>A0A8C5BE81</b> | Fatty acid-binding protein, heart-like OS=Gadus morhua<br>OX=8049 GN=LOC115535843 PE=3 SV=1                   | 29 | 2  |
| <b>A0A8C5BFU7</b> | Fatty acid binding protein 7, brain, a OS=Gadus morhua<br>OX=8049 GN=fabp7a PE=3 SV=1                         | 33 | 6  |
| <b>A0A8C5AWR7</b> | Glutathione S-transferase OS=Gadus morhua OX=8049 PE=3<br>SV=1                                                | 58 | 23 |
| <b>A0A8C5CS68</b> | Glutathione transferase OS=Gadus morhua OX=8049<br>GN=LOC115559880 PE=3 SV=1                                  | 21 | 8  |
| <b>A0A8C5BRM0</b> | Glyceraldehyde-3-phosphate dehydrogenase OS=Gadus<br>morhua OX=8049 GN=gapdhs PE=3 SV=1                       | 23 | 10 |
| <b>A0A8C5FRQ7</b> | Glyceraldehyde-3-phosphate dehydrogenase OS=Gadus<br>morhua OX=8049 PE=3 SV=1                                 | 29 | 10 |
| <b>A0A8C4ZT40</b> | H15 domain-containing protein OS=Gadus morhua OX=8049<br>PE=3 SV=1                                            | 31 | 21 |
| <b>A0A8C5CS77</b> | H15 domain-containing protein OS=Gadus morhua OX=8049<br>PE=3 SV=1                                            | 21 | 9  |
| <b>A0A8C5CEI3</b> | Hemopexin-like OS=Gadus morhua OX=8049<br>GN=LOC115542094 PE=4 SV=1                                           | 50 | 41 |
| <b>A0A8C5AUL3</b> | Hemopexin-like OS=Gadus morhua OX=8049<br>GN=LOC115542094 PE=4 SV=1                                           | 23 | 10 |
| <b>A0A8C5CRJ4</b> | Isocitrate dehydrogenase [NAD] subunit, mitochondrial<br>OS=Gadus morhua OX=8049 GN=LOC115558864 PE=3<br>SV=1 | 22 | 9  |
| <b>A0A8C5BYC4</b> | Isocitrate dehydrogenase [NAD] subunit, mitochondrial<br>OS=Gadus morhua OX=8049 PE=3 SV=1                    | 22 | 5  |
| <b>A0A7S5GEL2</b> | MHC class I antigen (Fragment) OS=Gadus morhua OX=8049<br>PE=4 SV=1                                           | 40 | 2  |
| <b>A0A7S5GEE2</b> | MHC class I antigen (Fragment) OS=Gadus morhua OX=8049<br>PE=4 SV=1                                           | 54 | 2  |
| <b>A0A8C5ABC3</b> | Mitochondrial ribosomal protein L12 OS=Gadus morhua<br>OX=8049 GN=mrpl12 PE=3 SV=1                            | 22 | 2  |
| <b>A0A8C5BLV9</b> | Mitochondrial ribosomal protein S28 OS=Gadus morhua<br>OX=8049 PE=4 SV=1                                      | 26 | 2  |
| <b>G0XNX7</b>     | Peptidylprolyl isomerase OS=Gadus morhua OX=8049<br>GN=FKBP-1A PE=2 SV=1                                      | 37 | 4  |
| <b>A0A8C4ZZ30</b> | Peptidylprolyl isomerase OS=Gadus morhua OX=8049 PE=4<br>SV=1                                                 | 22 | 3  |
| <b>A0A8C5F4N2</b> | Phosphopyruvate hydratase OS=Gadus morhua OX=8049<br>GN=eno1a PE=3 SV=1                                       | 30 | 16 |
| <b>A0A8C5ARZ5</b> | Phosphopyruvate hydratase OS=Gadus morhua OX=8049<br>GN=eno3 PE=3 SV=1                                        | 26 | 9  |

|                   |                                                                                                                                              |    |      |
|-------------------|----------------------------------------------------------------------------------------------------------------------------------------------|----|------|
| <b>A0A8C4ZDU4</b> | Proteasome inhibitor PI31 subunit OS=Gadus morhua<br>OX=8049 GN=psmf1 PE=3 SV=1                                                              | 26 | 3    |
| <b>A0A8C5CW85</b> | Proteasome subunit alpha type OS=Gadus morhua OX=8049<br>GN=psma6b PE=3 SV=1                                                                 | 30 | 4    |
| <b>A0A8C5FC39</b> | Purine-rich element binding protein Aa OS=Gadus morhua<br>OX=8049 GN=puraa PE=3 SV=1                                                         | 38 | 8    |
| <b>A0A8C4ZR55</b> | Purine-rich element binding protein Ab OS=Gadus morhua<br>OX=8049 GN=purab PE=3 SV=1                                                         | 37 | 7    |
| <b>A0A8C5CWX1</b> | Pyruvate carboxylase OS=Gadus morhua OX=8049 GN=pc<br>PE=4 SV=1                                                                              | 25 | 24   |
| <b>A0A8C4YUX8</b> | Pyruvate dehydrogenase E1 component subunit beta<br>OS=Gadus morhua OX=8049 GN=pdhb PE=4 SV=1                                                | 36 | 13   |
| <b>A0A8C4YVK4</b> | Secreted phosphoprotein 24 OS=Gadus morhua OX=8049<br>PE=3 SV=1                                                                              | 49 | 22   |
| <b>A0A8C5AI73</b> | Secreted protein, acidic, cysteine-rich (osteonectin) OS=Gadus<br>morhua OX=8049 GN=sparc PE=3 SV=1                                          | 54 | 23   |
| <b>A0A8C4Z972</b> | Serine and arginine rich splicing factor 3b OS=Gadus morhua<br>OX=8049 GN=srsf3b PE=4 SV=1                                                   | 27 | 4    |
| <b>A0A8C4ZNP4</b> | Serine protease inhibitor 2.1-like OS=Gadus morhua<br>OX=8049 GN=LOC115553729 PE=3 SV=1                                                      | 25 | 9    |
| <b>A0A8C4ZBT5</b> | Serotransferrin OS=Gadus morhua OX=8049<br>GN=LOC115548408 PE=3 SV=1                                                                         | 63 | 99   |
| <b>Q92079</b>     | Serotransferrin (Fragment) OS=Gadus morhua OX=8049<br>GN=tf PE=2 SV=1                                                                        | 57 | 87   |
| <b>A0A8C4YVJ7</b> | Serpin peptidase inhibitor, clade C (antithrombin), member 1<br>OS=Gadus morhua OX=8049 GN=serpine1 PE=3 SV=1                                | 36 | 16   |
| <b>A0A8C4ZHL1</b> | Serpin peptidase inhibitor, clade G (C1 inhibitor), member 1<br>OS=Gadus morhua OX=8049 PE=3 SV=1                                            | 22 | 17   |
| <b>A0A8C5B1A4</b> | Splicing factor, arginine/serine-rich 1 OS=Gadus morhua<br>OX=8049 GN=srsf1a PE=3 SV=1                                                       | 27 | 7    |
| <b>A0A8C4ZJ74</b> | Splicing factor, arginine/serine-rich 1 OS=Gadus morhua<br>OX=8049 GN=LOC115547035 PE=3 SV=1                                                 | 28 | 5    |
| <b>A0A8C5AFL5</b> | Tectorin alpha OS=Gadus morhua OX=8049 PE=4 SV=1                                                                                             | 59 | 1500 |
| <b>A0A8C4ZVQ3</b> | Tectorin beta OS=Gadus morhua OX=8049 PE=4 SV=1                                                                                              | 42 | 84   |
| <b>A0A8C5BN57</b> | Tetraspanin OS=Gadus morhua OX=8049 GN=cd63 PE=3<br>SV=1                                                                                     | 21 | 4    |
| <b>A0A8C4Z2M4</b> | Tetraspanin OS=Gadus morhua OX=8049 GN=cd81a PE=3<br>SV=1                                                                                    | 23 | 7    |
| <b>A0A8C5CUN9</b> | Tropomyosin 4a OS=Gadus morhua OX=8049 GN=TPM4<br>PE=3 SV=1                                                                                  | 28 | 6    |
| <b>A0A8C4ZKE4</b> | Tropomyosin alpha-3 chain-like OS=Gadus morhua OX=8049<br>GN=LOC115554335 PE=3 SV=1                                                          | 40 | 12   |
| <b>A0A8C5CKR8</b> | Tyrosine 3-monooxygenase/tryptophan 5-monooxygenase<br>activation protein, beta polypeptide a OS=Gadus morhua<br>OX=8049 GN=ywhaba PE=3 SV=1 | 30 | 7    |
| <b>A0A8C4ZTF2</b> | Tyrosine 3-monooxygenase/tryptophan 5-monooxygenase<br>activation protein, eta polypeptide OS=Gadus morhua<br>OX=8049 GN=ywhah PE=3 SV=1     | 38 | 9    |
| <b>A0A8C5BGJ3</b> | Vacuolar protein sorting-associated protein 4B-like OS=Gadus<br>morhua OX=8049 GN=LOC115556024 PE=3 SV=1                                     | 23 | 5    |
| <b>A0A8C4YVQ7</b> | Vacuolar proton pump subunit B OS=Gadus morhua<br>OX=8049 GN=atp6v1ba PE=3 SV=1                                                              | 26 | 8    |
| <b>A0A8C5FEZ6</b> | 14-3-3 protein beta/alpha-1-like OS=Gadus morhua OX=8049<br>GN=LOC115553599 PE=3 SV=1                                                        | 32 | 10   |

|                   |                                                                                                                             |    |    |
|-------------------|-----------------------------------------------------------------------------------------------------------------------------|----|----|
| <b>A0A8C5BPU1</b> | 2-oxoisovalerate dehydrogenase subunit alpha OS=Gadus morhua OX=8049 GN=bckdha PE=3 SV=1                                    | 25 | 5  |
| <b>A0A8C5FET6</b> | 26S proteasome regulatory subunit 7 OS=Gadus morhua OX=8049 GN=PSMC2 PE=3 SV=1                                              | 21 | 9  |
| <b>A0A8C5B226</b> | 40S_SA_C domain-containing protein OS=Gadus morhua OX=8049 PE=3 SV=1                                                        | 29 | 6  |
| <b>A0A8C5B0N5</b> | 72 kDa type IV collagenase OS=Gadus morhua OX=8049 PE=3 SV=1                                                                | 34 | 29 |
| <b>A0A8C5BBZ7</b> | 78 kDa glucose-regulated protein OS=Gadus morhua OX=8049 GN=hspa5 PE=3 SV=1                                                 | 34 | 28 |
| <b>A0A8C5F947</b> | A20-type domain-containing protein OS=Gadus morhua OX=8049 PE=4 SV=1                                                        | 21 | 2  |
| <b>A0A8C5C4N4</b> | Acetyl-CoA acetyltransferase 1 OS=Gadus morhua OX=8049 GN=acat1 PE=3 SV=1                                                   | 34 | 8  |
| <b>A0A8C4ZDZ9</b> | Actin-related protein 2/3 complex subunit 5 OS=Gadus morhua OX=8049 GN=arpc5b PE=3 SV=1                                     | 33 | 2  |
| <b>A0A8C5F5V1</b> | Adaptor related protein complex 3 subunit sigma 1 OS=Gadus morhua OX=8049 GN=ap3s1 PE=3 SV=1                                | 24 | 4  |
| <b>A0A8C5FQM0</b> | ADP-ribosylation factor OS=Gadus morhua OX=8049 GN=arf3a PE=3 SV=1                                                          | 23 | 4  |
| <b>A0A8C4YYC8</b> | ADP/ATP translocase OS=Gadus morhua OX=8049 GN=si:dkey-251i10.1 PE=3 SV=1                                                   | 23 | 7  |
| <b>A0A8C5AEV9</b> | Aldehyde dehydrogenase 1 family, member A3 OS=Gadus morhua OX=8049 GN=aldh1a3 PE=3 SV=1                                     | 32 | 14 |
| <b>A0A8C5A8C5</b> | Alpha-2-HS-glycoprotein-like OS=Gadus morhua OX=8049 GN=LOC115555905 PE=4 SV=1                                              | 50 | 22 |
| <b>A0A8C5BZ34</b> | Alpha-2-macroglobulin-like OS=Gadus morhua OX=8049 GN=LOC115560909 PE=3 SV=1                                                | 23 | 31 |
| <b>A0A8C4ZMZ6</b> | Alpha-carbonic anhydrase domain-containing protein OS=Gadus morhua OX=8049 PE=3 SV=1                                        | 24 | 10 |
| <b>A0A8C4ZUJ5</b> | Aminoacyl-tRNA hydrolase OS=Gadus morhua OX=8049 GN=ptrh2 PE=4 SV=1                                                         | 28 | 2  |
| <b>A0A8C4ZRH8</b> | AMOP domain-containing protein OS=Gadus morhua OX=8049 PE=4 SV=1                                                            | 25 | 3  |
| <b>A0A8C4ZSL9</b> | Angiotensinogen OS=Gadus morhua OX=8049 PE=3 SV=1                                                                           | 37 | 16 |
| <b>A0A8C5BRQ2</b> | Annexin OS=Gadus morhua OX=8049 PE=3 SV=1                                                                                   | 32 | 8  |
| <b>A0A8C4ZKH5</b> | Anterior gradient 2 OS=Gadus morhua OX=8049 GN=agr2 PE=4 SV=1                                                               | 40 | 12 |
| <b>A0A8C4Z7S3</b> | AP-3 complex subunit mu-2 OS=Gadus morhua OX=8049 GN=ap3m2 PE=3 SV=1                                                        | 27 | 14 |
| <b>A0A8C5FUT7</b> | Aspartate aminotransferase OS=Gadus morhua OX=8049 GN=got2b PE=3 SV=1                                                       | 57 | 32 |
| <b>A0A8C5AUM7</b> | ATP-binding cassette, sub-family B (MDR/TAP), member 7 OS=Gadus morhua OX=8049 GN=ABCB7 PE=4 SV=1                           | 37 | 7  |
| <b>A0A8C5FR97</b> | AU RNA binding protein/enoyl-CoA hydratase OS=Gadus morhua OX=8049 GN=auh PE=3 SV=1                                         | 21 | 6  |
| <b>A0A8C4ZJ41</b> | B9 protein domain 1 OS=Gadus morhua OX=8049 GN=b9d1 PE=4 SV=1                                                               | 37 | 3  |
| <b>A0A8C4ZFY9</b> | Basement membrane-specific heparan sulfate proteoglycan core protein-like OS=Gadus morhua OX=8049 GN=LOC115539906 PE=4 SV=1 | 22 | 5  |
| <b>A0A8C4Z8Y0</b> | Beta-2-glycoprotein 1 OS=Gadus morhua OX=8049 GN=LOC115540415 PE=4 SV=1                                                     | 42 | 15 |
| <b>A0A8C4ZRP9</b> | Biliverdin reductase B OS=Gadus morhua OX=8049 GN=blvrb PE=4 SV=1                                                           | 21 | 12 |

|                   |                                                                                                                                |    |    |
|-------------------|--------------------------------------------------------------------------------------------------------------------------------|----|----|
| <b>A0A8C4ZUH7</b> | BRICHOS domain-containing protein OS=Gadus morhua<br>OX=8049 PE=3 SV=1                                                         | 24 | 11 |
| <b>A0A8C4ZVU2</b> | Bulb-type lectin domain-containing protein OS=Gadus morhua<br>OX=8049 PE=4 SV=1                                                | 31 | 3  |
| <b>A0A8C4ZKX9</b> | Carbonic anhydrase OS=Gadus morhua OX=8049 PE=3 SV=1                                                                           | 23 | 5  |
| <b>A8CZB9</b>     | Carbonyl reductase (NADPH) OS=Gadus morhua OX=8049<br>GN=cbr1 PE=2 SV=1                                                        | 43 | 12 |
| <b>A0A8C4YVZ2</b> | Carboxylic ester hydrolase OS=Gadus morhua OX=8049<br>PE=3 SV=1                                                                | 30 | 31 |
| <b>A0A8C5AKB1</b> | Carboxypeptidase E OS=Gadus morhua OX=8049 GN=cpe<br>PE=3 SV=1                                                                 | 34 | 15 |
| <b>A0A0D3MJC9</b> | Cathelicidin 1 OS=Gadus morhua OX=8049 PE=4 SV=1                                                                               | 26 | 4  |
| <b>A0A8C5A2Y8</b> | Cell division cycle 42, like OS=Gadus morhua OX=8049<br>GN=cdc42l PE=4 SV=1                                                    | 29 | 3  |
| <b>A0A8C4ZA55</b> | Ceruloplasmin OS=Gadus morhua OX=8049 GN=cp PE=3<br>SV=1                                                                       | 28 | 41 |
| <b>A0A8C4ZLQ2</b> | Chitinase, di-N-acetyl- OS=Gadus morhua OX=8049<br>GN=ctbs PE=3 SV=1                                                           | 31 | 8  |
| <b>A0A8C5CT12</b> | Chloride intracellular channel protein OS=Gadus morhua<br>OX=8049 GN=clic4 PE=3 SV=1                                           | 33 | 7  |
| <b>A0A8C4ZHY1</b> | Chondroadherin-like b OS=Gadus morhua OX=8049<br>GN=chadlb PE=3 SV=1                                                           | 27 | 20 |
| <b>A0A8C5FGY4</b> | Chromosome 4 C7orf57 homolog OS=Gadus morhua<br>OX=8049 GN=c4h7orf57 PE=4 SV=1                                                 | 22 | 3  |
| <b>A0A8C4Z6P9</b> | Citrate synthase OS=Gadus morhua OX=8049 GN=cs PE=3<br>SV=1                                                                    | 36 | 14 |
| <b>A0A8C4ZQT0</b> | Clusterin OS=Gadus morhua OX=8049 GN=clu PE=3 SV=1                                                                             | 29 | 24 |
| <b>A0A8C5CSC6</b> | Cochlin OS=Gadus morhua OX=8049 PE=4 SV=1                                                                                      | 41 | 16 |
| <b>A0A8C5CG95</b> | Cofilin 1 OS=Gadus morhua OX=8049 PE=3 SV=1                                                                                    | 32 | 3  |
| <b>K7P818</b>     | Corticotropin-releasing hormone (Fragment) OS=Gadus<br>morhua OX=8049 PE=2 SV=1                                                | 28 | 2  |
| <b>A0A8C4ZSV3</b> | Creatine kinase OS=Gadus morhua OX=8049<br>GN=LOC115551044 PE=3 SV=1                                                           | 24 | 8  |
| <b>A0A8C5BQQ2</b> | Cystatin-like OS=Gadus morhua OX=8049<br>GN=LOC115559797 PE=4 SV=1                                                             | 37 | 4  |
| <b>A0A8C5BH78</b> | Cytidine deaminase OS=Gadus morhua OX=8049 GN=cdab<br>PE=3 SV=1                                                                | 45 | 5  |
| <b>A0A8C5FIW7</b> | Cytoskeleton associated protein 4 OS=Gadus morhua<br>OX=8049 PE=4 SV=1                                                         | 27 | 9  |
| <b>A0A8C4ZF74</b> | Decorin OS=Gadus morhua OX=8049 GN=lum PE=3 SV=1                                                                               | 43 | 37 |
| <b>A0A8C5A5M0</b> | Deoxyribonuclease II OS=Gadus morhua OX=8049<br>GN=dnase2 PE=3 SV=1                                                            | 26 | 9  |
| <b>A0A8C5B153</b> | Dihydrolipoamide acetyltransferase component of pyruvate<br>dehydrogenase complex OS=Gadus morhua OX=8049<br>GN=dbt PE=3 SV=1  | 31 | 8  |
| <b>A0A8C5F3L5</b> | DNA-(apurinic or apyrimidinic site) lyase OS=Gadus morhua<br>OX=8049 GN=rps3 PE=3 SV=1                                         | 28 | 7  |
| <b>A0A8C5AX27</b> | Dolichyl-diphosphooligosaccharide--protein<br>glycosyltransferase 48 kDa subunit OS=Gadus morhua<br>OX=8049 GN=ddost PE=3 SV=1 | 29 | 7  |
| <b>A0A8C5FEX0</b> | EGF containing fibulin extracellular matrix protein 2a<br>OS=Gadus morhua OX=8049 GN=efemp2a PE=4 SV=1                         | 25 | 8  |
| <b>A0A8C4Z6G9</b> | EH-domain containing 1a OS=Gadus morhua OX=8049 PE=4<br>SV=1                                                                   | 32 | 13 |

|                   |                                                                                                      |    |    |
|-------------------|------------------------------------------------------------------------------------------------------|----|----|
| <b>A0A8C4ZCU6</b> | Electron transfer flavoprotein subunit beta OS=Gadus morhua<br>OX=8049 GN=etfb PE=3 SV=1             | 22 | 5  |
| <b>A0A8C4YZH3</b> | Ezrin b OS=Gadus morhua OX=8049 PE=4 SV=1                                                            | 24 | 17 |
| <b>A0A8C5FDF8</b> | F-actin-capping protein subunit beta OS=Gadus morhua<br>OX=8049 GN=capzb PE=3 SV=1                   | 22 | 4  |
| <b>A0A8C5AUG4</b> | Ferritin OS=Gadus morhua OX=8049 GN=fth1b PE=3 SV=1                                                  | 35 | 4  |
| <b>A0A8C5CSQ7</b> | Fetuin B OS=Gadus morhua OX=8049 GN=fetub PE=4 SV=1                                                  | 30 | 25 |
| <b>A0A8C4ZAZ7</b> | Fib_alpha domain-containing protein OS=Gadus morhua<br>OX=8049 PE=4 SV=1                             | 26 | 16 |
| <b>A0A8C4YTJ7</b> | Fibronectin OS=Gadus morhua OX=8049 GN=fn1b PE=4<br>SV=1                                             | 21 | 47 |
| <b>A0A8C4Z1C2</b> | Filamin B OS=Gadus morhua OX=8049 GN=FLNB PE=3<br>SV=1                                               | 21 | 44 |
| <b>A0A8C5B536</b> | Fish-egg lectin-like OS=Gadus morhua OX=8049<br>GN=LOC115543029 PE=4 SV=1                            | 23 | 2  |
| <b>A0A8C5A144</b> | Fructose-bisphosphate aldolase OS=Gadus morhua OX=8049<br>PE=3 SV=1                                  | 34 | 14 |
| <b>A0A8C5A4T9</b> | Glutamate dehydrogenase OS=Gadus morhua OX=8049<br>GN=glud1b PE=3 SV=1                               | 21 | 7  |
| <b>A0A8C5CJ72</b> | Glutamine synthetase OS=Gadus morhua OX=8049<br>GN=LOC115549024 PE=3 SV=1                            | 33 | 14 |
| <b>A0A8C4Z128</b> | Glypican-1 OS=Gadus morhua OX=8049 GN=gpc1b PE=3<br>SV=1                                             | 34 | 17 |
| <b>A0A8C5CU97</b> | H(+)-transporting two-sector ATPase OS=Gadus morhua<br>OX=8049 GN=LOC115547679 PE=3 SV=1             | 25 | 13 |
| <b>A0A8C4ZDY0</b> | Hyaluronan and proteoglycan link protein 1-like OS=Gadus<br>morhua OX=8049 GN=LOC115545700 PE=4 SV=1 | 60 | 41 |
| <b>A0A8C5ALM2</b> | IF rod domain-containing protein OS=Gadus morhua<br>OX=8049 PE=4 SV=1                                | 34 | 16 |
| <b>A0A8C5FTW0</b> | Insulin-like growth factor-binding protein 5 OS=Gadus<br>morhua OX=8049 GN=LOC115533059 PE=4 SV=1    | 26 | 5  |
| <b>A0A8C4Z2D5</b> | Integral membrane protein 2 OS=Gadus morhua OX=8049<br>GN=ITM2B PE=3 SV=1                            | 39 | 6  |
| <b>A0A8C5AFR1</b> | Intermediate filament protein ON3-like OS=Gadus morhua<br>OX=8049 GN=si:dkey-222f2.1 PE=3 SV=1       | 59 | 55 |
| <b>P83856</b>     | Kininogen (Fragment) OS=Gadus morhua OX=8049 PE=1<br>SV=1                                            | 73 | 13 |
| <b>A0A8C5D2A7</b> | L-lactate dehydrogenase OS=Gadus morhua OX=8049<br>GN=LOC115541542 PE=3 SV=1                         | 23 | 12 |
| <b>A0A8C5FKH1</b> | LAM_G_DOMAIN domain-containing protein OS=Gadus<br>morhua OX=8049 PE=4 SV=1                          | 24 | 2  |
| <b>A0A8C5A0N8</b> | Legumain OS=Gadus morhua OX=8049 PE=3 SV=1                                                           | 24 | 8  |
| <b>A0A8C5CP04</b> | Leukocyte cell-derived chemotaxin 2 like OS=Gadus morhua<br>OX=8049 GN=lect2l PE=3 SV=1              | 39 | 4  |
| <b>A0A8C4Z4T0</b> | LIM domain only 4a OS=Gadus morhua OX=8049 GN=lmo4a<br>PE=4 SV=1                                     | 22 | 3  |
| <b>A0A8C5BCZ5</b> | Lipase, gastric OS=Gadus morhua OX=8049 GN=lipf PE=4<br>SV=1                                         | 23 | 7  |
| <b>A0A8C5F684</b> | Lipocalin-like OS=Gadus morhua OX=8049<br>GN=LOC115537335 PE=3 SV=1                                  | 28 | 4  |
| <b>A0A8C5FMA7</b> | Lumican OS=Gadus morhua OX=8049 GN=lum PE=3 SV=1                                                     | 22 | 5  |
| <b>A0A8C4YZP8</b> | Malate dehydrogenase OS=Gadus morhua OX=8049<br>GN=MDH1 PE=3 SV=1                                    | 42 | 15 |
| <b>A0A8C4ZB43</b> | Matrilin 4 OS=Gadus morhua OX=8049 PE=4 SV=1                                                         | 39 | 22 |

|                   |                                                                                                                |    |     |
|-------------------|----------------------------------------------------------------------------------------------------------------|----|-----|
| <b>A0A8C5ANV1</b> | MAX dimerization protein 3 OS=Gadus morhua OX=8049<br>GN=mx3 PE=4 SV=1                                         | 22 | 2   |
| <b>A0A8C5F3P5</b> | Metalloproteinase inhibitor 2 OS=Gadus morhua OX=8049<br>GN=timp2a PE=3 SV=1                                   | 22 | 5   |
| <b>A0A8C5BRA9</b> | MOB-like protein phocein OS=Gadus morhua OX=8049<br>GN=LOC115533190 PE=3 SV=1                                  | 46 | 5   |
| <b>A0A8C5B6I8</b> | Myelin basic protein OS=Gadus morhua OX=8049 PE=3<br>SV=1                                                      | 22 | 2   |
| <b>A0A8C5AZT6</b> | Myosin, heavy chain 9b, non-muscle OS=Gadus morhua<br>OX=8049 GN=myh9b PE=3 SV=1                               | 24 | 40  |
| <b>A0A8C4Z4B3</b> | NADH dehydrogenase [ubiquinone] 1 alpha subcomplex<br>subunit 5 OS=Gadus morhua OX=8049 GN=ndufa5 PE=3<br>SV=1 | 28 | 2   |
| <b>A0A8C5C1Y0</b> | NEDD8-activating enzyme E1 catalytic subunit OS=Gadus<br>morhua OX=8049 GN=UBA3 PE=3 SV=1                      | 22 | 2   |
| <b>A0A8C5F8Q7</b> | NPC intracellular cholesterol transporter 2 OS=Gadus morhua<br>OX=8049 GN=np2 PE=3 SV=1                        | 22 | 2   |
| <b>A0A8C4Z782</b> | Nucleobindin 1 OS=Gadus morhua OX=8049 GN=nucb1<br>PE=4 SV=1                                                   | 29 | 13  |
| <b>A0A8C5FK28</b> | Nucleolin OS=Gadus morhua OX=8049 PE=4 SV=1                                                                    | 36 | 19  |
| <b>A0A8C5CS13</b> | Nucleoside diphosphate kinase B OS=Gadus morhua<br>OX=8049 GN=LOC115534945 PE=3 SV=1                           | 28 | 8   |
| <b>A0A8C5F796</b> | Otogelin OS=Gadus morhua OX=8049 PE=4 SV=1                                                                     | 28 | 271 |
| <b>A0A8C5CL43</b> | Otolin 1a OS=Gadus morhua OX=8049 PE=4 SV=1                                                                    | 59 | 363 |
| <b>A0A8C4ZN86</b> | Palmitoyl-protein thioesterase 1 OS=Gadus morhua OX=8049<br>GN=ppt1 PE=3 SV=1                                  | 26 | 7   |
| <b>A0A8C4Z087</b> | Parvalbumin OS=Gadus morhua OX=8049 PE=3 SV=1                                                                  | 34 | 8   |
| <b>A0A8C4Z9P1</b> | Pentaxin OS=Gadus morhua OX=8049 GN=LOC115554653<br>PE=3 SV=1                                                  | 40 | 11  |
| <b>A0A8C5CXJ9</b> | Peptidase S1 domain-containing protein OS=Gadus morhua<br>OX=8049 PE=4 SV=1                                    | 28 | 3   |
| <b>A0A8C4Z702</b> | Peroxiredoxin-1 OS=Gadus morhua OX=8049 GN=prdx2<br>PE=3 SV=1                                                  | 46 | 24  |
| <b>A0A8C4ZJD9</b> | Peroxiredoxin-5 OS=Gadus morhua OX=8049 GN=prdx5<br>PE=3 SV=1                                                  | 59 | 11  |
| <b>A0A8C4ZTM6</b> | Peroxiredoxin-6 OS=Gadus morhua OX=8049 GN=prdx6<br>PE=3 SV=1                                                  | 21 | 3   |
| <b>A0A8C5AMQ1</b> | Plasminogen OS=Gadus morhua OX=8049 GN=plg PE=3<br>SV=1                                                        | 57 | 47  |
| <b>A0A8C5FU23</b> | Procollagen-lysine 5-dioxygenase OS=Gadus morhua<br>OX=8049 GN=plod3 PE=4 SV=1                                 | 28 | 17  |
| <b>A0A8C5AMS0</b> | Programmed cell death 6 interacting protein OS=Gadus<br>morhua OX=8049 PE=4 SV=1                               | 36 | 29  |
| <b>A0A8C5C7T6</b> | Prosaposin OS=Gadus morhua OX=8049 GN=psap PE=4<br>SV=1                                                        | 21 | 10  |
| <b>A0A8C5BRA4</b> | Prothrombin OS=Gadus morhua OX=8049 PE=4 SV=1                                                                  | 42 | 28  |
| <b>A0A8C5F477</b> | Rab GDP dissociation inhibitor OS=Gadus morhua OX=8049<br>GN=GDI2 PE=3 SV=1                                    | 26 | 9   |
| <b>A0A8C4ZBY9</b> | RAB1A, member RAS oncogene family OS=Gadus morhua<br>OX=8049 GN=RAB1A PE=4 SV=1                                | 33 | 9   |
| <b>A0A8C5FV19</b> | Ras-related protein Rab-11B-like OS=Gadus morhua<br>OX=8049 GN=LOC115555445 PE=4 SV=1                          | 30 | 5   |
| <b>A0A8C4ZKD5</b> | Retinol binding protein 4, plasma OS=Gadus morhua<br>OX=8049 GN=rbp4 PE=3 SV=1                                 | 27 | 8   |



|                   |                                                                                                   |    |    |
|-------------------|---------------------------------------------------------------------------------------------------|----|----|
| <b>A0A8C5CXI4</b> | Rho GDP-dissociation inhibitor 1-like OS=Gadus morhua<br>OX=8049 GN=ARHGDIA PE=3 SV=1             | 34 | 4  |
| <b>A0A8C5FJ16</b> | Ribonucleoprotein OS=Gadus morhua OX=8049 GN=snu13b<br>PE=3 SV=1                                  | 38 | 5  |
| <b>A0A8C5F3W2</b> | Ring-box 1, E3 ubiquitin protein ligase OS=Gadus morhua<br>OX=8049 GN=rbx1 PE=3 SV=1              | 37 | 2  |
| <b>A0A8C5BRM3</b> | RNA helicase OS=Gadus morhua OX=8049 PE=3 SV=1                                                    | 23 | 13 |
| <b>A0A8C4YVX7</b> | RNase_Pc domain-containing protein OS=Gadus morhua<br>OX=8049 PE=3 SV=1                           | 27 | 3  |
| <b>A0A8C4ZP25</b> | Selenoprotein F OS=Gadus morhua OX=8049 PE=3 SV=1                                                 | 25 | 3  |
| <b>A0A8C5A0K6</b> | Semaphorin 7A OS=Gadus morhua OX=8049 PE=4 SV=1                                                   | 24 | 6  |
| <b>A0A8C5BNA3</b> | Serine/threonine-protein phosphatase OS=Gadus morhua<br>OX=8049 PE=3 SV=1                         | 22 | 7  |
| <b>A0A8C5C7G7</b> | Smoothelin a OS=Gadus morhua OX=8049 PE=4 SV=1                                                    | 25 | 2  |
| <b>A0A8C5A412</b> | SPATA6 domain-containing protein OS=Gadus morhua<br>OX=8049 PE=3 SV=1                             | 21 | 2  |
| <b>A0A8C4ZL50</b> | Superoxide dismutase [Cu-Zn] OS=Gadus morhua OX=8049<br>GN=sod1 PE=3 SV=1                         | 38 | 5  |
| <b>A0A8C5C6U5</b> | Syndecan binding protein (syntenin) 2 OS=Gadus morhua<br>OX=8049 GN=sdcbp2 PE=4 SV=1              | 25 | 10 |
| <b>A0A8C5FD79</b> | THAP-type domain-containing protein OS=Gadus morhua<br>OX=8049 PE=3 SV=1                          | 37 | 2  |
| <b>A0A8C5FED9</b> | Thioredoxin OS=Gadus morhua OX=8049 PE=3 SV=1                                                     | 24 | 3  |
| <b>A0A8C5FEZ3</b> | Thrombospondin 1b OS=Gadus morhua OX=8049 GN=thbs1b<br>PE=3 SV=1                                  | 27 | 37 |
| <b>A0A8C5BL35</b> | Thymidine phosphorylase OS=Gadus morhua OX=8049<br>GN=LOC115542463 PE=3 SV=1                      | 25 | 7  |
| <b>A0A8C4Z0M0</b> | Transgelin OS=Gadus morhua OX=8049 GN=TAGLN PE=3<br>SV=1                                          | 24 | 4  |
| <b>A0A8C4Z237</b> | Transitional endoplasmic reticulum ATPase OS=Gadus<br>morhua OX=8049 GN=vcp PE=3 SV=1             | 37 | 24 |
| <b>A0A8C4ZM89</b> | Triosephosphate isomerase OS=Gadus morhua OX=8049<br>PE=3 SV=1                                    | 49 | 16 |
| <b>Q56TU0</b>     | Type-4 ice-structuring protein OS=Gadus morhua OX=8049<br>PE=2 SV=1                               | 69 | 17 |
| <b>A0A8C4Z777</b> | U6 snRNA-associated Sm-like protein LSm4 OS=Gadus<br>morhua OX=8049 GN=LSM4 PE=3 SV=1             | 29 | 3  |
| <b>A0A8C4ZF86</b> | Ubiquitin-40S ribosomal protein S27a OS=Gadus morhua<br>OX=8049 GN=rps27a PE=3 SV=1               | 42 | 19 |
| <b>A0A8C5F9L8</b> | UMP-CMP kinase OS=Gadus morhua OX=8049 GN=cmpk<br>PE=3 SV=1                                       | 23 | 3  |
| <b>A0A8C4Z6C0</b> | Vitronectin b OS=Gadus morhua OX=8049 GN=vtnb PE=4<br>SV=1                                        | 21 | 12 |
| <b>A0A8C5FKS7</b> | Voltage-dependent anion-selective channel protein 2<br>OS=Gadus morhua OX=8049 GN=vdac2 PE=3 SV=1 | 27 | 8  |

\* psms=Peptide Spectrum Matches



Table S4. The full list of the 247 most abundant proteins identified from female Atlantic Cod (*Gadus morhua*)

| Accession  | Description                                                                               | Sequence coverage | psms * |
|------------|-------------------------------------------------------------------------------------------|-------------------|--------|
| A0A8C5C226 | Keratin, type I cytoskeletal 13-like OS=Gadus morhua<br>OX=8049 GN=LOC115534825 PE=4 SV=1 | 59                | 44     |
| A0A8C5F7T9 | Keratin, type I cytoskeletal 13-like OS=Gadus morhua<br>OX=8049 GN=LOC115540539 PE=4 SV=1 | 29                | 14     |
| A0A8C5CKE2 | Keratin, type I cytoskeletal 13-like OS=Gadus morhua<br>OX=8049 GN=LOC115534825 PE=4 SV=1 | 40                | 21     |
| A0A8C4ZFJ9 | Keratin, type I cytoskeletal 13-like OS=Gadus morhua<br>OX=8049 GN=LOC115534848 PE=4 SV=1 | 24                | 12     |
| A0A8C4YVX1 | Keratin, type I cytoskeletal 18-like OS=Gadus morhua<br>OX=8049 GN=LOC115539991 PE=3 SV=1 | 45                | 24     |
| A0A8C5BJ41 | Keratin, type II cytoskeletal 8-like OS=Gadus morhua OX=8049<br>GN=LOC115556866 PE=3 SV=1 | 38                | 38     |
| A0A8C5BT07 | 40S ribosomal protein S18 OS=Gadus morhua OX=8049<br>GN=rps18 PE=3 SV=1                   | 24                | 4      |
| A0A8C5BHD6 | 40S ribosomal protein S19 OS=Gadus morhua OX=8049 PE=3<br>SV=1                            | 28                | 4      |
| A0A8C4ZDQ0 | 40S ribosomal protein S2 OS=Gadus morhua OX=8049<br>GN=rps2 PE=3 SV=1                     | 27                | 6      |
| A0A8C4ZDL6 | 40S ribosomal protein S28 OS=Gadus morhua OX=8049<br>GN=rps28 PE=3 SV=1                   | 33                | 2      |
| A0A8C4YW06 | 40S ribosomal protein S3a OS=Gadus morhua OX=8049<br>GN=rps3a PE=3 SV=1                   | 32                | 8      |
| A0A8C5BUC6 | 40S ribosomal protein S8 OS=Gadus morhua OX=8049<br>GN=rps8a PE=3 SV=1                    | 28                | 5      |
| A0A8C5F524 | 40S ribosomal protein S9 OS=Gadus morhua OX=8049<br>GN=rps9 PE=3 SV=1                     | 23                | 5      |
| B8XJS4     | Hemoglobin alpha 1 OS=Gadus morhua OX=8049 GN=HbA1<br>PE=2 SV=1                           | 65                | 59     |
| B3F9E2     | Hemoglobin alpha chain OS=Gadus morhua OX=8049 PE=3<br>SV=1                               | 52                | 26     |
| C8YNQ6     | Hemoglobin beta 1 OS=Gadus morhua OX=8049 GN=HbB1<br>PE=3 SV=1                            | 74                | 27     |
| C8YNQ4     | Hemoglobin beta 1 OS=Gadus morhua OX=8049 GN=HbB1<br>PE=3 SV=1                            | 90                | 84     |
| B8XJS7     | Hemoglobin beta 2 OS=Gadus morhua OX=8049<br>GN=LOC115530778 PE=2 SV=1                    | 82                | 125    |
| C8YNR1     | Hemoglobin beta 3 OS=Gadus morhua OX=8049 GN=HbB3<br>PE=3 SV=1                            | 74                | 79     |
| B3F9U6     | Hemoglobin beta chain OS=Gadus morhua OX=8049 PE=3<br>SV=1                                | 73                | 70     |
| A0A8C4ZLA0 | 60S acidic ribosomal protein P2 OS=Gadus morhua OX=8049<br>GN=rplp2 PE=3 SV=1             | 79                | 13     |
| A0A8C4Z4T9 | 60S ribosomal protein L12 OS=Gadus morhua OX=8049 PE=3<br>SV=1                            | 26                | 3      |
| A0A8C5F6E6 | 60S ribosomal protein L27 OS=Gadus morhua OX=8049<br>GN=rpl27 PE=3 SV=1                   | 36                | 4      |
| A0A8C5BNH7 | 60S ribosomal protein L30 OS=Gadus morhua OX=8049<br>GN=rpl30 PE=3 SV=1                   | 35                | 4      |

|            |                                                                                                  |    |    |
|------------|--------------------------------------------------------------------------------------------------|----|----|
| A0A8C4Z1D1 | 60S ribosomal protein L31 OS=Gadus morhua OX=8049<br>GN=LOC115541599 PE=3 SV=1                   | 33 | 3  |
| A0A8C5BI74 | 60S ribosomal protein L7a OS=Gadus morhua OX=8049<br>GN=rp17a PE=3 SV=1                          | 31 | 11 |
| A0A8C5F819 | Apolipoprotein A-I-like OS=Gadus morhua OX=8049<br>GN=LOC115553333 PE=3 SV=1                     | 21 | 6  |
| A0A8C5BWD7 | Apolipoprotein A-Ia OS=Gadus morhua OX=8049 GN=apoa1a<br>PE=3 SV=1                               | 34 | 10 |
| A0A8C5A7M9 | Apolipoprotein A-II OS=Gadus morhua OX=8049 GN=apoa2<br>PE=4 SV=1                                | 66 | 31 |
| A0A8C5FHR5 | Apolipoprotein A-IV-like OS=Gadus morhua OX=8049<br>GN=LOC115535852 PE=3 SV=1                    | 73 | 34 |
| A0A8C4ZHM4 | Apolipoprotein C-I OS=Gadus morhua OX=8049 GN=apoc1<br>PE=3 SV=1                                 | 29 | 4  |
| A0A8C4ZH36 | Apolipoprotein Eb OS=Gadus morhua OX=8049 GN=apoeb<br>PE=3 SV=1                                  | 76 | 31 |
| A0A8C4ZH54 | Keratin 15 OS=Gadus morhua OX=8049 PE=4 SV=1                                                     | 39 | 25 |
| A0A8C4ZN68 | Keratin 15 OS=Gadus morhua OX=8049 PE=4 SV=1                                                     | 24 | 7  |
| A0A8C5AV29 | Keratin 15 OS=Gadus morhua OX=8049 PE=4 SV=1                                                     | 23 | 8  |
| A0A8C4YSX2 | Keratin 8 OS=Gadus morhua OX=8049 PE=3 SV=1                                                      | 44 | 62 |
| A0A8C5B373 | Keratin 8 OS=Gadus morhua OX=8049 PE=3 SV=1                                                      | 53 | 69 |
| A0A8C5B602 | Keratin 94 OS=Gadus morhua OX=8049 PE=3 SV=1                                                     | 50 | 27 |
| A0A8C5FBY0 | Protein disulfide-isomerase OS=Gadus morhua OX=8049<br>GN=pdia3 PE=3 SV=1                        | 42 | 20 |
| A0A8C5B0S5 | Protein disulfide-isomerase OS=Gadus morhua OX=8049 PE=3<br>SV=1                                 | 32 | 18 |
| A0A8C4ZCP9 | Protein S100 OS=Gadus morhua OX=8049 PE=3 SV=1                                                   | 38 | 20 |
| A0A8C4ZUG6 | Protein S100 OS=Gadus morhua OX=8049<br>GN=LOC115535334 PE=3 SV=1                                | 24 | 3  |
| A0A8C5AZX1 | Protein S100 OS=Gadus morhua OX=8049 GN=s100a10a PE=3<br>SV=1                                    | 46 | 6  |
| A0A8C4Z902 | Protein Z-dependent protease inhibitor-like OS=Gadus morhua<br>OX=8049 GN=LOC115534600 PE=3 SV=1 | 37 | 43 |
| A0A8C5BRB8 | Tubulin alpha chain OS=Gadus morhua OX=8049<br>GN=LOC115533160 PE=3 SV=1                         | 41 | 31 |
| A0A8C5AZ29 | Tubulin alpha chain OS=Gadus morhua OX=8049<br>GN=LOC115559022 PE=3 SV=1                         | 39 | 40 |
| A0A8C5B8B8 | Tubulin alpha chain OS=Gadus morhua OX=8049 PE=3 SV=1                                            | 30 | 29 |
| Q9YHC3     | Tubulin beta-1 chain OS=Gadus morhua OX=8049 PE=2 SV=1                                           | 50 | 57 |
| A0A8C4ZP37 | Tubulin beta chain OS=Gadus morhua OX=8049 GN=tubb5<br>PE=3 SV=1                                 | 62 | 70 |
| A0A8C4Z8U4 | Tubulin beta chain OS=Gadus morhua OX=8049 GN=tubb6<br>PE=3 SV=1                                 | 32 | 25 |
| Q8JHA8     | Ribosomal protein L15 (Fragment) OS=Gadus morhua<br>OX=8049 PE=2 SV=1                            | 21 | 3  |
| A0A8C5FU09 | Ribosomal protein L18 OS=Gadus morhua OX=8049 PE=3<br>SV=1                                       | 25 | 3  |
| A0A8C4Z4U8 | Ribosomal protein L7 OS=Gadus morhua OX=8049 GN=RPL7<br>PE=3 SV=1                                | 31 | 5  |
| A0A8C4ZSJ7 | Ribosomal protein S4 X-linked OS=Gadus morhua OX=8049<br>PE=3 SV=1                               | 25 | 6  |
| A0A8C4ZNJ6 | Ribosomal protein, large, P0 OS=Gadus morhua OX=8049<br>GN=rp1p0 PE=3 SV=1                       | 35 | 7  |

|            |                                                                                                                     |    |    |
|------------|---------------------------------------------------------------------------------------------------------------------|----|----|
| A0A8C5CNE1 | Tropomyosin 1 (alpha) OS=Gadus morhua OX=8049<br>GN=TPM1 PE=3 SV=1                                                  | 38 | 24 |
| A0A8C5CUN9 | Tropomyosin 4a OS=Gadus morhua OX=8049 GN=TPM4<br>PE=3 SV=1                                                         | 38 | 17 |
| A0A8C5BX34 | Tropomyosin alpha-1 chain-like OS=Gadus morhua OX=8049<br>GN=LOC115548938 PE=3 SV=1                                 | 38 | 16 |
| A0A8C5AXJ8 | Tropomyosin alpha-1 chain-like OS=Gadus morhua OX=8049<br>GN=LOC115558702 PE=3 SV=1                                 | 48 | 19 |
| A0A8C4ZKE4 | Tropomyosin alpha-3 chain-like OS=Gadus morhua OX=8049<br>GN=LOC115554335 PE=3 SV=1                                 | 33 | 12 |
| A0A8C4ZAA7 | Histone H2A OS=Gadus morhua OX=8049<br>GN=LOC115529517 PE=3 SV=1                                                    | 31 | 4  |
| A0A8C4Z1Y0 | Histone H2A OS=Gadus morhua OX=8049 PE=3 SV=1                                                                       | 37 | 8  |
| A0A8C5CJK0 | Histone H3 OS=Gadus morhua OX=8049 PE=3 SV=1                                                                        | 36 | 3  |
| A0A8C5B042 | Histone H4 OS=Gadus morhua OX=8049 PE=3 SV=1                                                                        | 58 | 21 |
| A0A8C4Z328 | 14-3-3 protein beta/alpha-1-like OS=Gadus morhua OX=8049<br>GN=LOC115553599 PE=3 SV=1                               | 41 | 12 |
| A0A8C4ZJE1 | 14-3-3 protein beta/alpha-like OS=Gadus morhua OX=8049<br>GN=LOC115534522 PE=3 SV=1                                 | 22 | 8  |
| A0A8C5C8H7 | 14-3-3 protein epsilon-like OS=Gadus morhua OX=8049<br>GN=LOC115546836 PE=3 SV=1                                    | 25 | 8  |
| A0A8C4ZAY7 | Fibrinogen beta chain OS=Gadus morhua OX=8049 GN=fgb<br>PE=4 SV=1                                                   | 30 | 16 |
| A0A8C5F4R5 | Fibrinogen C-terminal domain-containing protein OS=Gadus<br>morhua OX=8049 PE=4 SV=1                                | 24 | 5  |
| A0A8C4YWD2 | Fibrinogen gamma chain OS=Gadus morhua OX=8049 GN=fgg<br>PE=4 SV=1                                                  | 42 | 18 |
| A0A8C5BBM7 | Heat shock cognate 70 kDa protein OS=Gadus morhua<br>OX=8049 GN=LOC115546994 PE=3 SV=1                              | 32 | 29 |
| A0A8C5FKJ8 | Heat shock protein 90, alpha (cytosolic), class A member 1,<br>tandem duplicate 2 OS=Gadus morhua OX=8049 PE=3 SV=1 | 24 | 26 |
| A0A8C4ZI26 | Heat shock protein 90, alpha (cytosolic), class A member 1,<br>tandem duplicate 2 OS=Gadus morhua OX=8049 PE=3 SV=1 | 37 | 42 |
| A0A8C4ZTE5 | High mobility group-T protein-like OS=Gadus morhua<br>OX=8049 GN=LOC115561521 PE=3 SV=1                             | 26 | 9  |
| A0A8C5FTZ2 | High mobility group box 1 OS=Gadus morhua OX=8049 PE=3<br>SV=1                                                      | 32 | 13 |
| A0A8C4ZQW9 | High mobility group box 2a OS=Gadus morhua OX=8049<br>GN=hmg2a PE=4 SV=1                                            | 34 | 9  |
| G0XNX4     | Peptidyl-prolyl cis-trans isomerase OS=Gadus morhua<br>OX=8049 PE=2 SV=1                                            | 31 | 5  |
| A0A8C4ZXA3 | Peptidyl-prolyl cis-trans isomerase OS=Gadus morhua<br>OX=8049 GN=LOC115531931 PE=3 SV=1                            | 29 | 6  |
| A0A8C4ZFF2 | Peptidyl-prolyl cis-trans isomerase OS=Gadus morhua<br>OX=8049 GN=LOC115545253 PE=3 SV=1                            | 26 | 3  |
| A0A8C4Z972 | Serine and arginine rich splicing factor 3b OS=Gadus morhua<br>OX=8049 GN=srsf3b PE=4 SV=1                          | 25 | 5  |
| A0A8C4Z936 | Serine and arginine rich splicing factor 9 OS=Gadus morhua<br>OX=8049 GN=srsf9 PE=4 SV=1                            | 23 | 4  |
| A0A8C4ZNP4 | Serine protease inhibitor 2.1-like OS=Gadus morhua OX=8049<br>GN=LOC115553729 PE=3 SV=1                             | 25 | 8  |
| A0A8C5BD06 | SERPIN domain-containing protein OS=Gadus morhua<br>OX=8049 PE=3 SV=1                                               | 28 | 7  |
| A0A8C5D2V1 | SERPIN domain-containing protein OS=Gadus morhua<br>OX=8049 PE=3 SV=1                                               | 47 | 97 |

|            |                                                                                                                            |    |    |
|------------|----------------------------------------------------------------------------------------------------------------------------|----|----|
| A0A8C5AT89 | SERPIN domain-containing protein OS=Gadus morhua<br>OX=8049 PE=3 SV=1                                                      | 41 | 75 |
| A0A8C4ZKN5 | Acidic (leucine-rich) nuclear phosphoprotein 32 family, member<br>A OS=Gadus morhua OX=8049 GN=anp32a PE=3 SV=1            | 26 | 7  |
| A0A8C4Z0E3 | Acidic leucine-rich nuclear phosphoprotein 32 family member<br>D-like OS=Gadus morhua OX=8049 GN=LOC115529167<br>PE=3 SV=1 | 28 | 7  |
| A0A8C5AGK0 | ATP synthase subunit alpha OS=Gadus morhua OX=8049<br>GN=atp5fa1 PE=3 SV=1                                                 | 24 | 16 |
| A0A8C4YZ60 | ATP synthase subunit beta OS=Gadus morhua OX=8049<br>GN=LOC115533330 PE=3 SV=1                                             | 34 | 20 |
| A0A8C4ZUH7 | BRICHOS domain-containing protein OS=Gadus morhua<br>OX=8049 PE=3 SV=1                                                     | 23 | 19 |
| A0A8C5A632 | BRICHOS domain containing 5 OS=Gadus morhua OX=8049<br>GN=bricd5 PE=4 SV=1                                                 | 21 | 6  |
| A0A8C5CK47 | CARD domain-containing protein OS=Gadus morhua OX=8049<br>PE=4 SV=1                                                        | 30 | 3  |
| A0A8C5B1W4 | CARD domain-containing protein OS=Gadus morhua OX=8049<br>PE=4 SV=1                                                        | 28 | 3  |
| A0A8C5F6L1 | Fructose-bisphosphate aldolase OS=Gadus morhua OX=8049<br>PE=3 SV=1                                                        | 30 | 14 |
| A0A8C5A144 | Fructose-bisphosphate aldolase OS=Gadus morhua OX=8049<br>PE=3 SV=1                                                        | 30 | 10 |
| A0A8C5AWR7 | Glutathione S-transferase OS=Gadus morhua OX=8049 PE=3<br>SV=1                                                             | 50 | 25 |
| A0A8C5CS68 | Glutathione transferase OS=Gadus morhua OX=8049<br>GN=LOC115559880 PE=3 SV=1                                               | 23 | 3  |
| A0A8C5CV28 | Ig-like domain-containing protein OS=Gadus morhua OX=8049<br>PE=3 SV=1                                                     | 21 | 14 |
| A0A8C5BPZ1 | Ig-like domain-containing protein OS=Gadus morhua OX=8049<br>PE=4 SV=1                                                     | 31 | 3  |
| A0A8C5F855 | Lysozyme g OS=Gadus morhua OX=8049 GN=LOC115556755<br>PE=3 SV=1                                                            | 24 | 3  |
| B9TU22     | Lysozyme g OS=Gadus morhua OX=8049 PE=1 SV=1                                                                               | 51 | 13 |
| A0A8C5B6I8 | Myelin basic protein OS=Gadus morhua OX=8049 PE=3 SV=1                                                                     | 30 | 5  |
| A0A8C5AXT9 | Myelin basic protein OS=Gadus morhua OX=8049 PE=3 SV=1                                                                     | 31 | 2  |
| A0A8C4Z087 | Parvalbumin OS=Gadus morhua OX=8049 PE=3 SV=1                                                                              | 42 | 12 |
| A0A8C5FH27 | Parvalbumin OS=Gadus morhua OX=8049<br>GN=LOC115537726 PE=3 SV=1                                                           | 34 | 4  |
| A0A8C4ZZ30 | Peptidylprolyl isomerase OS=Gadus morhua OX=8049 PE=4<br>SV=1                                                              | 33 | 4  |
| G0XNX7     | Peptidylprolyl isomerase OS=Gadus morhua OX=8049<br>GN=FKBP-1A PE=2 SV=1                                                   | 33 | 6  |
| A0A8C4Z702 | Peroxiredoxin-1 OS=Gadus morhua OX=8049 GN=prdx2 PE=3<br>SV=1                                                              | 22 | 4  |
| A0A8C5BZK3 | Phosphopyruvate hydratase OS=Gadus morhua OX=8049<br>GN=eno3 PE=3 SV=1                                                     | 24 | 10 |
| A0A8C5F4N2 | Phosphopyruvate hydratase OS=Gadus morhua OX=8049<br>GN=eno1a PE=3 SV=1                                                    | 45 | 22 |
| A0A8C5FUV6 | Profilin OS=Gadus morhua OX=8049 GN=LOC115529555<br>PE=3 SV=1                                                              | 21 | 3  |
| A0A8C4Z2Y9 | Profilin OS=Gadus morhua OX=8049 GN=LOC115555837<br>PE=3 SV=1                                                              | 30 | 3  |
| A0A8C5FC39 | Purine-rich element binding protein Aa OS=Gadus morhua<br>OX=8049 GN=puraa PE=3 SV=1                                       | 34 | 7  |

|             |                                                                                                                                               |    |      |
|-------------|-----------------------------------------------------------------------------------------------------------------------------------------------|----|------|
| A0A8C4ZR55  | Purine-rich element binding protein Ab OS=Gadus morhua<br>OX=8049 GN=purab PE=3 SV=1                                                          | 38 | 8    |
| A0A8C5C2F7  | RNA binding protein, mRNA processing factor 2b OS=Gadus<br>morhua OX=8049 PE=4 SV=1                                                           | 21 | 2    |
| A0A8C5A2J8  | RNA helicase OS=Gadus morhua OX=8049 GN=eif4a1a PE=3<br>SV=1                                                                                  | 26 | 9    |
| A0A8C5C2D2  | RNAse_Pc domain-containing protein OS=Gadus morhua<br>OX=8049 PE=3 SV=1                                                                       | 31 | 4    |
| A0A8C4YVX7  | RNAse_Pc domain-containing protein OS=Gadus morhua<br>OX=8049 PE=3 SV=1                                                                       | 34 | 4    |
| A0A8C4YVK4  | Secreted phosphoprotein 24 OS=Gadus morhua OX=8049 PE=3<br>SV=1                                                                               | 41 | 14   |
| A0A8C5AI73  | Secreted protein, acidic, cysteine-rich (osteonectin) OS=Gadus<br>morhua OX=8049 GN=sparc PE=3 SV=1                                           | 35 | 47   |
| A0A8C5FDG2  | Serotransferrin OS=Gadus morhua OX=8049<br>GN=LOC115548408 PE=3 SV=1                                                                          | 75 | 177  |
| Q92079      | Serotransferrin (Fragment) OS=Gadus morhua OX=8049 GN=tf<br>PE=2 SV=1                                                                         | 69 | 175  |
| A0A8C4YVJ7  | Serpin peptidase inhibitor, clade C (antithrombin), member 1<br>OS=Gadus morhua OX=8049 GN=serpinc1 PE=3 SV=1                                 | 25 | 9    |
| A0A8C4ZHL1  | Serpin peptidase inhibitor, clade G (C1 inhibitor), member 1<br>OS=Gadus morhua OX=8049 PE=3 SV=1                                             | 23 | 16   |
| A0A8C4ZL50  | Superoxide dismutase [Cu-Zn] OS=Gadus morhua OX=8049<br>GN=sod1 PE=3 SV=1                                                                     | 33 | 5    |
| A0A8C5CQP1  | Superoxide dismutase [Mn], mitochondrial OS=Gadus morhua<br>OX=8049 PE=3 SV=1                                                                 | 27 | 3    |
| A0A8C5AFL5  | Tectorin alpha OS=Gadus morhua OX=8049 PE=4 SV=1                                                                                              | 50 | 1116 |
| A0A8C4ZVQ3  | Tectorin beta OS=Gadus morhua OX=8049 PE=4 SV=1                                                                                               | 43 | 60   |
| A0A8C5F9N4  | Transgelin OS=Gadus morhua OX=8049 GN=LOC115547387<br>PE=3 SV=1                                                                               | 21 | 4    |
| A0A8C4Z0M0  | Transgelin OS=Gadus morhua OX=8049 GN=TAGLN PE=3<br>SV=1                                                                                      | 21 | 3    |
| A0A8C5AQ56  | Tyrosine 3-monooxygenase/tryptophan 5-monooxygenase<br>activation protein, beta polypeptide a OS=Gadus morhua<br>OX=8049 GN=ywhaba PE=3 SV=1  | 29 | 8    |
| A0A8C4ZDU6  | Tyrosine 3-monooxygenase/tryptophan 5-monooxygenase<br>activation protein, theta polypeptide b OS=Gadus morhua<br>OX=8049 GN=ywhaqb PE=3 SV=1 | 34 | 11   |
| A0A8C5B7B5  | Ubiquitin carboxyl-terminal hydrolase OS=Gadus morhua<br>OX=8049 PE=3 SV=1                                                                    | 25 | 5    |
| A0A8C5BWN9  | Ubiquitin conjugating enzyme E2 L3 OS=Gadus morhua<br>OX=8049 GN=UBE2L3 PE=3 SV=1                                                             | 35 | 2    |
| A0A8C5B226  | 40S_SA_C domain-containing protein OS=Gadus morhua<br>OX=8049 PE=3 SV=1                                                                       | 23 | 6    |
| A0A8C5BBZ7  | 78 kDa glucose-regulated protein OS=Gadus morhua OX=8049<br>GN=hspa5 PE=3 SV=1                                                                | 25 | 15   |
| A0A8C4ZDZ9  | Actin-related protein 2/3 complex subunit 5 OS=Gadus morhua<br>OX=8049 GN=arpc5b PE=3 SV=1                                                    | 31 | 3    |
| A0A8C4YWG5  | Acyl-CoA synthetase family member 3 OS=Gadus morhua<br>OX=8049 GN=ACSF3 PE=3 SV=1                                                             | 21 | 9    |
| A0A8C5A8C5  | Alpha-2-HS-glycoprotein-like OS=Gadus morhua OX=8049<br>GN=LOC115555905 PE=4 SV=1                                                             | 47 | 27   |
| A0A8C4ZMZ6  | Alpha-carbonic anhydrase domain-containing protein<br>OS=Gadus morhua OX=8049 PE=3 SV=1                                                       | 24 | 13   |
| cRAP_P02662 | Alpha-S1-casein OS=Bos taurus GN=CSN1S1 PE=1 SV=2                                                                                             | 22 | 4    |

|            |                                                                                                                                   |    |    |
|------------|-----------------------------------------------------------------------------------------------------------------------------------|----|----|
| A0A8C4ZRH8 | AMOP domain-containing protein OS=Gadus morhua OX=8049<br>PE=4 SV=1                                                               | 25 | 3  |
| A0A8C4ZSL9 | Angiotensinogen OS=Gadus morhua OX=8049 PE=3 SV=1                                                                                 | 36 | 21 |
| A0A8C5BRQ2 | Annexin OS=Gadus morhua OX=8049 PE=3 SV=1                                                                                         | 21 | 9  |
| A0A8C4ZKH5 | Anterior gradient 2 OS=Gadus morhua OX=8049 GN=agr2<br>PE=4 SV=1                                                                  | 24 | 7  |
| A0A8C4Z7S3 | AP-3 complex subunit mu-2 OS=Gadus morhua OX=8049<br>GN=ap3m2 PE=3 SV=1                                                           | 32 | 11 |
| A0A8C4ZK56 | Arrestin domain containing 1a OS=Gadus morhua OX=8049<br>GN=arrdc1a PE=3 SV=1                                                     | 22 | 7  |
| A0A8C5BJ01 | Aspartate aminotransferase OS=Gadus morhua OX=8049<br>GN=got2b PE=3 SV=1                                                          | 30 | 9  |
| A0A8C5AUM7 | ATP-binding cassette, sub-family B (MDR/TAP), member 7<br>OS=Gadus morhua OX=8049 GN=ABCB7 PE=4 SV=1                              | 36 | 6  |
| A0A8C4ZFY9 | Basement membrane-specific heparan sulfate proteoglycan core<br>protein-like OS=Gadus morhua OX=8049 GN=LOC115539906<br>PE=4 SV=1 | 23 | 6  |
| A0A8C4Z8Y0 | Beta-2-glycoprotein 1 OS=Gadus morhua OX=8049<br>GN=LOC115540415 PE=4 SV=1                                                        | 26 | 8  |
| A0A8C4ZRP9 | Biliverdin reductase B OS=Gadus morhua OX=8049 GN=blvrb<br>PE=4 SV=1                                                              | 22 | 11 |
| A0A8C5BSR3 | Calmodulin 2a (phosphorylase kinase, delta) OS=Gadus morhua<br>OX=8049 GN=calm1b PE=4 SV=1                                        | 23 | 14 |
| A0A8C5F686 | Calreticulin OS=Gadus morhua OX=8049 PE=3 SV=1                                                                                    | 27 | 9  |
| A0A8C4ZKX9 | Carbonic anhydrase OS=Gadus morhua OX=8049 PE=3 SV=1                                                                              | 23 | 5  |
| A0A8C4YVZ2 | Carboxylic ester hydrolase OS=Gadus morhua OX=8049 PE=3<br>SV=1                                                                   | 31 | 26 |
| A0A8C5AKB1 | Carboxypeptidase E OS=Gadus morhua OX=8049 GN=cpe<br>PE=3 SV=1                                                                    | 38 | 20 |
| A0A8C5FKG2 | Casein kinase II subunit beta OS=Gadus morhua OX=8049<br>GN=csnk2b PE=3 SV=1                                                      | 27 | 4  |
| A0A8C5F9E5 | Cathepsin H OS=Gadus morhua OX=8049 GN=CTSH PE=3<br>SV=1                                                                          | 25 | 6  |
| A0A8C4ZA55 | Ceruloplasmin OS=Gadus morhua OX=8049 GN=cp PE=3<br>SV=1                                                                          | 26 | 27 |
| A0A8C4ZHY1 | Chondroadherin-like b OS=Gadus morhua OX=8049<br>GN=chadlb PE=3 SV=1                                                              | 27 | 18 |
| A0A8C5ATB3 | Clathrin light chain OS=Gadus morhua OX=8049 GN=clta<br>PE=3 SV=1                                                                 | 28 | 6  |
| A0A8C4ZQT0 | Clusterin OS=Gadus morhua OX=8049 GN=clu PE=3 SV=1                                                                                | 25 | 15 |
| A0A8C4ZD84 | Creatine kinase OS=Gadus morhua OX=8049 GN=ckbb PE=3<br>SV=1                                                                      | 27 | 7  |
| A0A8C5CTW8 | Cystatin-like OS=Gadus morhua OX=8049<br>GN=LOC115559797 PE=4 SV=1                                                                | 26 | 4  |
| A0A8C5BH78 | Cytidine deaminase OS=Gadus morhua OX=8049 GN=cdab<br>PE=3 SV=1                                                                   | 51 | 9  |
| A0A8C4ZGK7 | Cytochrome c oxidase assembly protein COX18, mitochondrial<br>OS=Gadus morhua OX=8049 GN=igfbp7 PE=4 SV=1                         | 26 | 5  |
| A0A8C4ZF74 | Decorin OS=Gadus morhua OX=8049 GN=lum PE=3 SV=1                                                                                  | 43 | 46 |
| A0A8C5A5M0 | Deoxyribonuclease II OS=Gadus morhua OX=8049 GN=dnase2<br>PE=3 SV=1                                                               | 24 | 7  |
| A0A8C4Z9J0 | DHRS-12_like_SDR_c-like domain-containing protein<br>OS=Gadus morhua OX=8049 GN=LOC115561183 PE=4 SV=1                            | 25 | 8  |



|            |                                                                                                             |    |     |
|------------|-------------------------------------------------------------------------------------------------------------|----|-----|
| A0A8C5F3L5 | DNA-(apurinic or apyrimidinic site) lyase OS=Gadus morhua<br>OX=8049 GN=rps3 PE=3 SV=1                      | 28 | 6   |
| A0A8C5FEX0 | EGF containing fibulin extracellular matrix protein 2a<br>OS=Gadus morhua OX=8049 GN=efemp2a PE=4 SV=1      | 22 | 8   |
| A0A8C5F5J6 | Eosinophil peroxidase-like OS=Gadus morhua OX=8049<br>GN=LOC115542730 PE=4 SV=1                             | 31 | 20  |
| A0A8C4Z8T5 | Eukaryotic translation initiation factor 5A OS=Gadus morhua<br>OX=8049 GN=EIF5A PE=3 SV=1                   | 22 | 3   |
| A0A8C5BFU7 | Fatty acid binding protein 7, brain, a OS=Gadus morhua<br>OX=8049 GN=fabp7a PE=3 SV=1                       | 43 | 8   |
| A0A8C4Z775 | Follistatin-like 1b OS=Gadus morhua OX=8049 PE=4 SV=1                                                       | 49 | 27  |
| A0A8C4ZQN2 | FTP domain-containing protein OS=Gadus morhua OX=8049<br>PE=4 SV=1                                          | 22 | 2   |
| A0A8C4ZC59 | Glutamine synthetase OS=Gadus morhua OX=8049<br>GN=LOC115549024 PE=3 SV=1                                   | 28 | 12  |
| A0A8C5B8Y4 | Glyceraldehyde-3-phosphate dehydrogenase OS=Gadus morhua<br>OX=8049 GN=gapdhs PE=3 SV=1                     | 23 | 8   |
| A0A8C4Z128 | Glypican-1 OS=Gadus morhua OX=8049 GN=gpc1b PE=3<br>SV=1                                                    | 49 | 25  |
| A0A8C4ZT40 | H15 domain-containing protein OS=Gadus morhua OX=8049<br>PE=3 SV=1                                          | 25 | 14  |
| A0A8C5BES6 | Heme-binding protein 2-like OS=Gadus morhua OX=8049<br>GN=LOC115538475 PE=3 SV=1                            | 21 | 3   |
| A0A8C5CEI3 | Hemopexin-like OS=Gadus morhua OX=8049<br>GN=LOC115542094 PE=4 SV=1                                         | 52 | 103 |
| A0A8C4ZDY0 | Hyaluronan and proteoglycan link protein 1-like OS=Gadus<br>morhua OX=8049 GN=LOC115545700 PE=4 SV=1        | 52 | 82  |
| A0A8C5FTW0 | Insulin-like growth factor-binding protein 5 OS=Gadus morhua<br>OX=8049 GN=LOC115533059 PE=4 SV=1           | 26 | 5   |
| A0A8C4Z0D0 | Interferon stimulated exonuclease gene 20-like 2 OS=Gadus<br>morhua OX=8049 GN=isg20l2 PE=4 SV=1            | 22 | 34  |
| A0A8C5AFR1 | Intermediate filament protein ON3-like OS=Gadus morhua<br>OX=8049 GN=si:dkey-222f2.1 PE=3 SV=1              | 53 | 45  |
| P83856     | Kininogen (Fragment) OS=Gadus morhua OX=8049 PE=1<br>SV=1                                                   | 73 | 43  |
| A0A8C5F684 | Lipocalin-like OS=Gadus morhua OX=8049<br>GN=LOC115537335 PE=3 SV=1                                         | 28 | 10  |
| A0A8C5A4I1 | Macrophage migration inhibitory factor OS=Gadus morhua<br>OX=8049 GN=mif PE=3 SV=1                          | 44 | 6   |
| A0A8C4YZP8 | Malate dehydrogenase OS=Gadus morhua OX=8049<br>GN=MDH1 PE=3 SV=1                                           | 32 | 11  |
| A0A8C4ZB43 | Matrilin 4 OS=Gadus morhua OX=8049 PE=4 SV=1                                                                | 30 | 18  |
| A0A8C5F3P5 | Metalloproteinase inhibitor 2 OS=Gadus morhua OX=8049<br>GN=timp2a PE=3 SV=1                                | 46 | 11  |
| A0A8C4Z1X2 | Midkine a OS=Gadus morhua OX=8049 GN=mdka PE=3 SV=1                                                         | 22 | 2   |
| A0A8C5BRA9 | MOB-like protein phocein OS=Gadus morhua OX=8049<br>GN=LOC115533190 PE=3 SV=1                               | 71 | 7   |
| A0A8C5B7J2 | Multiple inositol polyphosphate phosphatase 1 OS=Gadus<br>morhua OX=8049 GN=LOC115559836 PE=3 SV=1          | 30 | 19  |
| A0A8C5B8E2 | Myosin light chain, phosphorylatable, fast skeletal muscle a<br>OS=Gadus morhua OX=8049 GN=mylpfa PE=4 SV=1 | 31 | 7   |
| A0A8C4YT70 | Myosin, light chain 1, alkali; skeletal, fast OS=Gadus morhua<br>OX=8049 GN=myl1 PE=4 SV=1                  | 26 | 4   |
| A0A8C5F8R7 | N-alpha-acetyltransferase 50, NatE catalytic subunit OS=Gadus<br>morhua OX=8049 GN=naa50 PE=4 SV=1          | 21 | 2   |



|            |                                                                                                    |    |     |
|------------|----------------------------------------------------------------------------------------------------|----|-----|
| A0A8C4YUX9 | Nascent polypeptide associated complex subunit alpha<br>OS=Gadus morhua OX=8049 GN=naca PE=4 SV=1  | 27 | 8   |
| A0A8C5F8Q7 | NPC intracellular cholesterol transporter 2 OS=Gadus morhua<br>OX=8049 GN=npcl2 PE=3 SV=1          | 28 | 3   |
| A0A8C5B4W1 | Nucleobindin-1 OS=Gadus morhua OX=8049 GN=nucb1 PE=3<br>SV=1                                       | 44 | 23  |
| A0A8C5FK28 | Nucleolin OS=Gadus morhua OX=8049 PE=4 SV=1                                                        | 33 | 17  |
| A0A8C5CS13 | Nucleoside diphosphate kinase B OS=Gadus morhua OX=8049<br>GN=LOC115534945 PE=3 SV=1               | 42 | 10  |
| A0A8C5F796 | Otogelin OS=Gadus morhua OX=8049 PE=4 SV=1                                                         | 24 | 213 |
| A0A8C5CL43 | Otolin 1a OS=Gadus morhua OX=8049 PE=4 SV=1                                                        | 46 | 327 |
| A0A8C5F6D1 | P1, F-box associated domain containing OS=Gadus morhua<br>OX=8049 GN=nccl1 PE=4 SV=1               | 22 | 4   |
| A0A8C5APQ5 | PDZ domain-containing protein OS=Gadus morhua OX=8049<br>PE=4 SV=1                                 | 25 | 3   |
| A0A8C4Z9P1 | Pentaxin OS=Gadus morhua OX=8049 GN=LOC115554653<br>PE=3 SV=1                                      | 29 | 6   |
| A0A8C5BVB7 | Pentraxin 3, long a OS=Gadus morhua OX=8049 GN=PTX3<br>PE=4 SV=1                                   | 25 | 13  |
| A0A8C4ZJD9 | Peroxiredoxin-5 OS=Gadus morhua OX=8049 GN=prdx5 PE=3<br>SV=1                                      | 45 | 8   |
| A0A8C4Z931 | Phosphoglycerate mutase OS=Gadus morhua OX=8049 PE=3<br>SV=1                                       | 25 | 7   |
| A0A8C5AMQ1 | Plasminogen OS=Gadus morhua OX=8049 GN=plg PE=3 SV=1                                               | 42 | 32  |
| A0A8C5C7T6 | Prosaposin OS=Gadus morhua OX=8049 GN=psap PE=4 SV=1                                               | 31 | 20  |
| A0A8C4Z9B2 | Proteasome subunit alpha type OS=Gadus morhua OX=8049<br>GN=psma6b PE=3 SV=1                       | 23 | 5   |
| A0A8C5BRA4 | Prothrombin OS=Gadus morhua OX=8049 PE=4 SV=1                                                      | 28 | 31  |
| A0A8C4ZS69 | RAB10, member RAS oncogene family OS=Gadus morhua<br>OX=8049 GN=rab10 PE=4 SV=1                    | 24 | 4   |
| A0A8C5FJA9 | Ras-related protein Rab-11B OS=Gadus morhua OX=8049<br>GN=LOC115549210 PE=4 SV=1                   | 39 | 4   |
| A0A8C4ZCJ5 | Reactive oxygen species modulator 1 OS=Gadus morhua<br>OX=8049 GN=romo1 PE=3 SV=1                  | 72 | 4   |
| A0A8C4ZKD5 | Retinol binding protein 4, plasma OS=Gadus morhua OX=8049<br>GN=rbp4 PE=3 SV=1                     | 27 | 6   |
| A0A8C5FJ16 | Ribonucloprotein OS=Gadus morhua OX=8049 GN=snu13b<br>PE=3 SV=1                                    | 33 | 3   |
| A0A8C5AFU2 | Ribosomal_S7 domain-containing protein OS=Gadus morhua<br>OX=8049 PE=3 SV=1                        | 21 | 4   |
| A0A8C5F6J1 | Sap30-like OS=Gadus morhua OX=8049 GN=SAP30L PE=3<br>SV=1                                          | 21 | 2   |
| A0A8C4ZP25 | Selenoprotein F OS=Gadus morhua OX=8049 PE=3 SV=1                                                  | 36 | 6   |
| A0A8C5CRA5 | SH3 domain-binding glutamic acid-rich-like protein OS=Gadus<br>morhua OX=8049 GN=SH3BGR1 PE=3 SV=1 | 44 | 4   |
| A0A8C5AB59 | Si:ch73-234b20.5 OS=Gadus morhua OX=8049 PE=3 SV=1                                                 | 28 | 2   |
| A0A8C5AKI2 | Sodium/potassium-transporting ATPase subunit beta OS=Gadus<br>morhua OX=8049 GN=atp1b1b PE=3 SV=1  | 37 | 13  |
| A0A8C4ZGQ6 | Solute carrier family 25 member 42 OS=Gadus morhua<br>OX=8049 GN=slc25a42 PE=3 SV=1                | 21 | 2   |
| P21919     | Somatolactin OS=Gadus morhua OX=8049 PE=1 SV=2                                                     | 33 | 3   |
| A0A8C4ZJ74 | Splicing factor, arginine/serine-rich 1 OS=Gadus morhua<br>OX=8049 GN=LOC115547035 PE=3 SV=1       | 22 | 4   |

|            |                                                                                          |    |    |
|------------|------------------------------------------------------------------------------------------|----|----|
| A0A8C5BZP7 | Stathmin OS=Gadus morhua OX=8049 GN=stmn1 PE=3 SV=1                                      | 24 | 2  |
| A0A8C5C6U5 | Syndecan binding protein (syntenin) 2 OS=Gadus morhua<br>OX=8049 GN=sdcbp2 PE=4 SV=1     | 24 | 10 |
| A0A8C5CJX2 | T-complex protein 1 subunit gamma OS=Gadus morhua<br>OX=8049 GN=cct3 PE=3 SV=1           | 21 | 7  |
| A0A8C4Z2M4 | Tetraspanin OS=Gadus morhua OX=8049 GN=cd81a PE=3<br>SV=1                                | 27 | 10 |
| A0A8C5FEZ3 | Thrombospondin 1b OS=Gadus morhua OX=8049 GN=thbs1b<br>PE=3 SV=1                         | 27 | 34 |
| A0A8C4Z0S8 | Thymidine kinase 2 OS=Gadus morhua OX=8049 GN=tk2<br>PE=3 SV=1                           | 25 | 2  |
| A0A8C5FB61 | Toll-like receptor 9 OS=Gadus morhua OX=8049<br>GN=LOC115546259 PE=4 SV=1                | 41 | 2  |
| A0A8C4ZH29 | Transformer 2 alpha homolog OS=Gadus morhua OX=8049<br>PE=4 SV=1                         | 26 | 3  |
| A0A8C4Z237 | Transitional endoplasmic reticulum ATPase OS=Gadus morhua<br>OX=8049 GN=vcp PE=3 SV=1    | 23 | 19 |
| A0A8C4ZEH5 | Transketolase b OS=Gadus morhua OX=8049 PE=4 SV=1                                        | 28 | 19 |
| A0A8C4ZM89 | Triosephosphate isomerase OS=Gadus morhua OX=8049 PE=3<br>SV=1                           | 54 | 18 |
| A0A8C4Z6X9 | Tumor protein, translationally-controlled 1 OS=Gadus morhua<br>OX=8049 GN=tpt1 PE=3 SV=1 | 22 | 3  |
| Q56TU0     | Type-4 ice-structuring protein OS=Gadus morhua OX=8049<br>PE=2 SV=1                      | 68 | 18 |
| A0A8C5ALF5 | V-type proton ATPase subunit G OS=Gadus morhua OX=8049<br>GN=atp6v1g1 PE=3 SV=1          | 57 | 5  |
| A0A8C4ZHX5 | Vesicle amine transport 1 OS=Gadus morhua OX=8049<br>GN=vat1 PE=4 SV=1                   | 21 | 7  |
| A0A8C5CHW7 | Vitellogenin-2-like OS=Gadus morhua OX=8049<br>GN=LOC115556237 PE=4 SV=1                 | 23 | 44 |
| A0A8C4Z6C0 | Vitronectin b OS=Gadus morhua OX=8049 GN=vtnb PE=4<br>SV=1                               | 23 | 11 |

\* psms= Peptide Spectrum Matches

OS=Organism Name

OX=Organism Identifier

PE=Protein Existence

SV=SequenceVersion

Table S5. According to the complete details of the protein description, there are **143** otolith core proteins, common between male and female Atlantic Cod (*Gadus morhua*) proteins.

| Accession  | Description                                                                                                          | Sequence coverage | psms * |
|------------|----------------------------------------------------------------------------------------------------------------------|-------------------|--------|
| A0A8C5BT07 | 40S ribosomal protein S18 OS=Gadus morhua OX=8049 GN=rps18 PE=3 SV=1                                                 | 34                | 7      |
| A0A8C4YW06 | 40S ribosomal protein S3a OS=Gadus morhua OX=8049 GN=rps3a PE=3 SV=1                                                 | 27                | 8      |
| A0A8C5F524 | 40S ribosomal protein S9 OS=Gadus morhua OX=8049 GN=rps9 PE=3 SV=1                                                   | 31                | 6      |
| A0A8C5B226 | 40S SA_C domain-containing protein OS=Gadus morhua OX=8049 PE=3 SV=1                                                 | 29                | 6      |
| A0A8C4ZLA0 | 60S acidic ribosomal protein P2 OS=Gadus morhua OX=8049 GN=rplp2 PE=3 SV=1                                           | 74                | 7      |
| A0A8C4Z4T9 | 60S ribosomal protein L12 OS=Gadus morhua OX=8049 PE=3 SV=1                                                          | 21                | 2      |
| A0A8C5F6E6 | 60S ribosomal protein L27 OS=Gadus morhua OX=8049 GN=rpl27 PE=3 SV=1                                                 | 43                | 6      |
| A0A8C5B174 | 60S ribosomal protein L7a OS=Gadus morhua OX=8049 GN=rpl7a PE=3 SV=1                                                 | 22                | 8      |
| A0A8C5BBZ7 | 78 kDa glucose-regulated protein OS=Gadus morhua OX=8049 GN=hspa5 PE=3 SV=1                                          | 34                | 28     |
| A0A8C4ZKN5 | Acidic (leucine-rich) nuclear phosphoprotein 32 family, member A OS=Gadus morhua OX=8049 GN=anp32a PE=3 SV=1         | 27                | 9      |
| A0A8C4Z0E3 | Acidic leucine-rich nuclear phosphoprotein 32 family member D-like OS=Gadus morhua OX=8049 GN=LOC115529167 PE=3 SV=1 | 28                | 9      |
| A0A8C4ZDZ9 | Actin-related protein 2/3 complex subunit 5 OS=Gadus morhua OX=8049 GN=arpc5b PE=3 SV=1                              | 33                | 2      |
| A0A8C5A8C5 | Alpha-2-HS-glycoprotein-like OS=Gadus morhua OX=8049 GN=LOC115555905 PE=4 SV=1                                       | 50                | 22     |
| A0A8C4ZMZ6 | Alpha-carbonic anhydrase domain-containing protein OS=Gadus morhua OX=8049 PE=3 SV=1                                 | 24                | 10     |
| A0A8C4ZRH8 | AMOP domain-containing protein OS=Gadus morhua OX=8049 PE=4 SV=1                                                     | 25                | 3      |
| A0A8C4ZSL9 | Angiotensinogen OS=Gadus morhua OX=8049 PE=3 SV=1                                                                    | 37                | 16     |
| A0A8C5BRQ2 | Annexin OS=Gadus morhua OX=8049 PE=3 SV=1                                                                            | 32                | 8      |
| A0A8C4ZKH5 | Anterior gradient 2 OS=Gadus morhua OX=8049 GN=agr2 PE=4 SV=1                                                        | 40                | 12     |
| A0A8C4Z7S3 | AP-3 complex subunit mu-2 OS=Gadus morhua OX=8049 GN=ap3m2 PE=3 SV=1                                                 | 27                | 14     |
| A0A8C5A7M9 | Apolipoprotein A-II OS=Gadus morhua OX=8049 GN=apoa2 PE=4 SV=1                                                       | 66                | 24     |
| A0A8C5FHR5 | Apolipoprotein A-IV-like OS=Gadus morhua OX=8049 GN=LOC115535852 PE=3 SV=1                                           | 67                | 24     |
| A0A8C4ZHM4 | Apolipoprotein C-I OS=Gadus morhua OX=8049 GN=apoc1 PE=3 SV=1                                                        | 27                | 3      |
| A0A8C4ZH36 | Apolipoprotein Eb OS=Gadus morhua OX=8049 GN=apoeb PE=3 SV=1                                                         | 77                | 36     |
| A0A8C5AGK0 | ATP synthase subunit alpha OS=Gadus morhua OX=8049 GN=atp5fa1 PE=3 SV=1                                              | 41                | 31     |
| A0A8C4YZ60 | ATP synthase subunit beta OS=Gadus morhua OX=8049 GN=LOC115533330 PE=3 SV=1                                          | 57                | 52     |
| A0A8C5AUM7 | ATP-binding cassette, sub-family B (MDR/TAP), member 7 OS=Gadus morhua OX=8049 GN=ABCB7 PE=4 SV=1                    | 37                | 7      |

|                   |                                                                                                                             |    |    |
|-------------------|-----------------------------------------------------------------------------------------------------------------------------|----|----|
| <b>A0A8C4ZFY9</b> | Basement membrane-specific heparan sulfate proteoglycan core protein-like OS=Gadus morhua OX=8049 GN=LOC115539906 PE=4 SV=1 | 22 | 5  |
| <b>A0A8C4Z8Y0</b> | Beta-2-glycoprotein 1 OS=Gadus morhua OX=8049 GN=LOC115540415 PE=4 SV=1                                                     | 42 | 15 |
| <b>A0A8C4ZRP9</b> | Biliverdin reductase B OS=Gadus morhua OX=8049 GN=blvrb PE=4 SV=1                                                           | 21 | 12 |
| <b>A0A8C4ZUH7</b> | BRICHOS domain-containing protein OS=Gadus morhua OX=8049 PE=3 SV=1                                                         | 24 | 11 |
| <b>A0A8C5F686</b> | Calreticulin OS=Gadus morhua OX=8049 PE=3 SV=1                                                                              | 30 | 14 |
| <b>A0A8C4ZKX9</b> | Carbonic anhydrase OS=Gadus morhua OX=8049 PE=3 SV=1                                                                        | 23 | 5  |
| <b>A0A8C4YVZ2</b> | Carboxylic ester hydrolase OS=Gadus morhua OX=8049 PE=3 SV=1                                                                | 30 | 31 |
| <b>A0A8C5AKB1</b> | Carboxypeptidase E OS=Gadus morhua OX=8049 GN=cpe PE=3 SV=1                                                                 | 34 | 15 |
| <b>A0A8C5FKG2</b> | Casein kinase II subunit beta OS=Gadus morhua OX=8049 GN=csnk2b PE=3 SV=1                                                   | 23 | 2  |
| <b>A0A8C4ZA55</b> | Ceruloplasmin OS=Gadus morhua OX=8049 GN=cp PE=3 SV=1                                                                       | 28 | 41 |
| <b>A0A8C4ZHY1</b> | Chondroadherin-like b OS=Gadus morhua OX=8049 GN=chadlb PE=3 SV=1                                                           | 27 | 20 |
| <b>A0A8C5ATB3</b> | Clathrin light chain OS=Gadus morhua OX=8049 GN=clta PE=3 SV=1                                                              | 22 | 3  |
| <b>A0A8C4ZQT0</b> | Clusterin OS=Gadus morhua OX=8049 GN=clu PE=3 SV=1                                                                          | 29 | 24 |
| <b>A0A8C5BH78</b> | Cytidine deaminase OS=Gadus morhua OX=8049 GN=cdab PE=3 SV=1                                                                | 45 | 5  |
| <b>A0A8C4ZGK7</b> | Cytochrome c oxidase assembly protein COX18, mitochondrial OS=Gadus morhua OX=8049 GN=igfbp7 PE=4 SV=1                      | 26 | 6  |
| <b>A0A8C4ZF74</b> | Decorin OS=Gadus morhua OX=8049 GN=lum PE=3 SV=1                                                                            | 43 | 37 |
| <b>A0A8C5A5M0</b> | Deoxyribonuclease II OS=Gadus morhua OX=8049 GN=dnase2 PE=3 SV=1                                                            | 26 | 9  |
| <b>A0A8C5F3L5</b> | DNA-(apurinic or apyrimidinic site) lyase OS=Gadus morhua OX=8049 GN=rps3 PE=3 SV=1                                         | 28 | 7  |
| <b>A0A8C5FEX0</b> | EGF containing fibulin extracellular matrix protein 2a OS=Gadus morhua OX=8049 GN=efemp2a PE=4 SV=1                         | 25 | 8  |
| <b>A0A8C5BFU7</b> | Fatty acid binding protein 7, brain, a OS=Gadus morhua OX=8049 GN=fabp7a PE=3 SV=1                                          | 33 | 6  |
| <b>A0A8C4ZAY7</b> | Fibrinogen beta chain OS=Gadus morhua OX=8049 GN=fgb PE=4 SV=1                                                              | 40 | 26 |
| <b>A0A8C5F4R5</b> | Fibrinogen C-terminal domain-containing protein OS=Gadus morhua OX=8049 PE=4 SV=1                                           | 25 | 8  |
| <b>A0A8C4YWD2</b> | Fibrinogen gamma chain OS=Gadus morhua OX=8049 GN=fgg PE=4 SV=1                                                             | 55 | 39 |
| <b>A0A8C5A144</b> | Fructose-bisphosphate aldolase OS=Gadus morhua OX=8049 PE=3 SV=1                                                            | 34 | 14 |
| <b>A0A8C5AWR7</b> | Glutathione S-transferase OS=Gadus morhua OX=8049 PE=3 SV=1                                                                 | 58 | 23 |
| <b>A0A8C5CS68</b> | Glutathione transferase OS=Gadus morhua OX=8049 GN=LOC115559880 PE=3 SV=1                                                   | 21 | 8  |
| <b>A0A8C4Z128</b> | Glypican-1 OS=Gadus morhua OX=8049 GN=gpc1b PE=3 SV=1                                                                       | 34 | 17 |
| <b>A0A8C4ZT40</b> | H15 domain-containing protein OS=Gadus morhua OX=8049 PE=3 SV=1                                                             | 31 | 21 |
| <b>A0A8C5BBM7</b> | Heat shock cognate 70 kDa protein OS=Gadus morhua OX=8049 GN=LOC115546994 PE=3 SV=1                                         | 41 | 36 |
| <b>A0A8C5FKJ8</b> | Heat shock protein 90, alpha (cytosolic), class A member 1, tandem duplicate 2 OS=Gadus morhua OX=8049 PE=3 SV=1            | 22 | 18 |
| <b>A0A8C4ZI26</b> | Heat shock protein 90, alpha (cytosolic), class A member 1, tandem duplicate 2 OS=Gadus morhua OX=8049 PE=3 SV=1            | 38 | 31 |
| <b>B8XJS4</b>     | Hemoglobin alpha 1 OS=Gadus morhua OX=8049 GN=HbA1 PE=2 SV=1                                                                | 57 | 41 |
| <b>B3F9E2</b>     | Hemoglobin alpha chain OS=Gadus morhua OX=8049 PE=3 SV=1                                                                    | 66 | 70 |

|                   |                                                                                                   |    |     |
|-------------------|---------------------------------------------------------------------------------------------------|----|-----|
| <b>C8YNQ4</b>     | Hemoglobin beta 1 OS=Gadus morhua OX=8049 GN=HbB1 PE=3 SV=1                                       | 81 | 40  |
| <b>B8XJS7</b>     | Hemoglobin beta 2 OS=Gadus morhua OX=8049 GN=LOC115530778 PE=2 SV=1                               | 88 | 120 |
| <b>C8YNR1</b>     | Hemoglobin beta 3 OS=Gadus morhua OX=8049 GN=HbB3 PE=3 SV=1                                       | 74 | 63  |
| <b>B3F9U6</b>     | Hemoglobin beta chain OS=Gadus morhua OX=8049 PE=3 SV=1                                           | 73 | 63  |
| <b>A0A8C5CEI3</b> | Hemopexin-like OS=Gadus morhua OX=8049 GN=LOC115542094 PE=4 SV=1                                  | 50 | 41  |
| <b>A0A8C5FTZ2</b> | High mobility group box 1 OS=Gadus morhua OX=8049 PE=3 SV=1                                       | 27 | 8   |
| <b>A0A8C4ZQW9</b> | High mobility group box 2a OS=Gadus morhua OX=8049 GN=hmg2a PE=4 SV=1                             | 27 | 8   |
| <b>A0A8C4ZTE5</b> | High mobility group-T protein-like OS=Gadus morhua OX=8049 GN=LOC115561521 PE=3 SV=1              | 34 | 5   |
| <b>A0A8C5B042</b> | Histone H4 OS=Gadus morhua OX=8049 PE=3 SV=1                                                      | 49 | 9   |
| <b>A0A8C4ZDY0</b> | Hyaluronan and proteoglycan link protein 1-like OS=Gadus morhua OX=8049 GN=LOC115545700 PE=4 SV=1 | 60 | 41  |
| <b>A0A8C5BPZ1</b> | Ig-like domain-containing protein OS=Gadus morhua OX=8049 PE=4 SV=1                               | 32 | 4   |
| <b>A0A8C5FTW0</b> | Insulin-like growth factor-binding protein 5 OS=Gadus morhua OX=8049 GN=LOC115533059 PE=4 SV=1    | 26 | 5   |
| <b>A0A8C5AFR1</b> | Intermediate filament protein ON3-like OS=Gadus morhua OX=8049 GN=si:dkey-222f2.1 PE=3 SV=1       | 59 | 55  |
| <b>A0A8C5B373</b> | Keratin 8 OS=Gadus morhua OX=8049 PE=3 SV=1                                                       | 48 | 56  |
| <b>A0A8C4YSX2</b> | Keratin 8 OS=Gadus morhua OX=8049 PE=3 SV=1                                                       | 47 | 71  |
| <b>A0A8C5B602</b> | Keratin 94 OS=Gadus morhua OX=8049 PE=3 SV=1                                                      | 57 | 44  |
| <b>A0A8C5C226</b> | Keratin, type I cytoskeletal 13-like OS=Gadus morhua OX=8049 GN=LOC115534825 PE=4 SV=1            | 40 | 24  |
| <b>A0A8C4ZFJ9</b> | Keratin, type I cytoskeletal 13-like OS=Gadus morhua OX=8049 GN=LOC115534848 PE=4 SV=1            | 21 | 11  |
| <b>A0A8C4YVX1</b> | Keratin, type I cytoskeletal 18-like OS=Gadus morhua OX=8049 GN=LOC115539991 PE=3 SV=1            | 82 | 40  |
| <b>P83856</b>     | Kininogen (Fragment) OS=Gadus morhua OX=8049 PE=1 SV=1                                            | 73 | 13  |
| <b>A0A8C5F684</b> | Lipocalin-like OS=Gadus morhua OX=8049 GN=LOC115537335 PE=3 SV=1                                  | 28 | 4   |
| <b>A0A8C4YZP8</b> | Malate dehydrogenase OS=Gadus morhua OX=8049 GN=MDH1 PE=3 SV=1                                    | 42 | 15  |
| <b>A0A8C4ZB43</b> | Matrilin 4 OS=Gadus morhua OX=8049 PE=4 SV=1                                                      | 39 | 22  |
| <b>A0A8C5F3P5</b> | Metalloproteinase inhibitor 2 OS=Gadus morhua OX=8049 GN=timp2a PE=3 SV=1                         | 22 | 5   |
| <b>A0A8C5BRA9</b> | MOB-like protein phocein OS=Gadus morhua OX=8049 GN=LOC115533190 PE=3 SV=1                        | 46 | 5   |
| <b>A0A8C5B6I8</b> | Myelin basic protein OS=Gadus morhua OX=8049 PE=3 SV=1                                            | 22 | 2   |
| <b>A0A8C5F8Q7</b> | NPC intracellular cholesterol transporter 2 OS=Gadus morhua OX=8049 GN=np2 PE=3 SV=1              | 22 | 2   |
| <b>A0A8C5FK28</b> | Nucleolin OS=Gadus morhua OX=8049 PE=4 SV=1                                                       | 36 | 19  |
| <b>A0A8C5CS13</b> | Nucleoside diphosphate kinase B OS=Gadus morhua OX=8049 GN=LOC115534945 PE=3 SV=1                 | 28 | 8   |
| <b>A0A8C5F796</b> | Otogelin OS=Gadus morhua OX=8049 PE=4 SV=1                                                        | 28 | 271 |
| <b>A0A8C5CL43</b> | Otolin 1a OS=Gadus morhua OX=8049 PE=4 SV=1                                                       | 59 | 363 |
| <b>A0A8C4Z087</b> | Parvalbumin OS=Gadus morhua OX=8049 PE=3 SV=1                                                     | 34 | 8   |
| <b>A0A8C4Z9P1</b> | Pentaxin OS=Gadus morhua OX=8049 GN=LOC115554653 PE=3 SV=1                                        | 40 | 11  |

|                   |                                                                                                             |    |    |
|-------------------|-------------------------------------------------------------------------------------------------------------|----|----|
| <b>A0A8C4ZXA3</b> | Peptidyl-prolyl cis-trans isomerase OS=Gadus morhua OX=8049 GN=LOC115531931 PE=3 SV=1                       | 38 | 10 |
| <b>A0A8C4ZFZ2</b> | Peptidyl-prolyl cis-trans isomerase OS=Gadus morhua OX=8049 GN=LOC115545253 PE=3 SV=1                       | 27 | 5  |
| <b>G0XNX7</b>     | Peptidylprolyl isomerase OS=Gadus morhua OX=8049 GN=FKBP-1A PE=2 SV=1                                       | 37 | 4  |
| <b>A0A8C4ZZ30</b> | Peptidylprolyl isomerase OS=Gadus morhua OX=8049 PE=4 SV=1                                                  | 22 | 3  |
| <b>A0A8C4Z702</b> | Peroxiredoxin-1 OS=Gadus morhua OX=8049 GN=prdx2 PE=3 SV=1                                                  | 46 | 24 |
| <b>A0A8C4ZJD9</b> | Peroxiredoxin-5 OS=Gadus morhua OX=8049 GN=prdx5 PE=3 SV=1                                                  | 59 | 11 |
| <b>A0A8C5F4N2</b> | Phosphopyruvate hydratase OS=Gadus morhua OX=8049 GN=eno1a PE=3 SV=1                                        | 30 | 16 |
| <b>A0A8C5AMQ1</b> | Plasminogen OS=Gadus morhua OX=8049 GN=plg PE=3 SV=1                                                        | 57 | 47 |
| <b>A0A8C5C7T6</b> | Prosaposin OS=Gadus morhua OX=8049 GN=psap PE=4 SV=1                                                        | 21 | 10 |
| <b>A0A8C5F8Y0</b> | Protein disulfide-isomerase OS=Gadus morhua OX=8049 GN=pdia3 PE=3 SV=1                                      | 43 | 29 |
| <b>A0A8C5B0S5</b> | Protein disulfide-isomerase OS=Gadus morhua OX=8049 PE=3 SV=1                                               | 43 | 26 |
| <b>A0A8C5AZX1</b> | Protein S100 OS=Gadus morhua OX=8049 GN=s100a10a PE=3 SV=1                                                  | 25 | 4  |
| <b>A0A8C4ZCP9</b> | Protein S100 OS=Gadus morhua OX=8049 PE=3 SV=1                                                              | 42 | 15 |
| <b>A0A8C4Z902</b> | Protein Z-dependent protease inhibitor-like OS=Gadus morhua OX=8049 GN=LOC115534600 PE=3 SV=1               | 45 | 26 |
| <b>A0A8C5BRA4</b> | Prothrombin OS=Gadus morhua OX=8049 PE=4 SV=1                                                               | 42 | 28 |
| <b>A0A8C5FC39</b> | Purine-rich element binding protein Aa OS=Gadus morhua OX=8049 GN=puraa PE=3 SV=1                           | 38 | 8  |
| <b>A0A8C4ZR55</b> | Purine-rich element binding protein Ab OS=Gadus morhua OX=8049 GN=purab PE=3 SV=1                           | 37 | 7  |
| <b>A0A8C4ZKD5</b> | Retinol binding protein 4, plasma OS=Gadus morhua OX=8049 GN=rbp4 PE=3 SV=1                                 | 27 | 8  |
| <b>A0A8C5FJ16</b> | Ribonucleoprotein OS=Gadus morhua OX=8049 GN=snu13b PE=3 SV=1                                               | 38 | 5  |
| <b>A0A8C4Z4U8</b> | Ribosomal protein L7 OS=Gadus morhua OX=8049 GN=RPL7 PE=3 SV=1                                              | 21 | 4  |
| <b>A0A8C4ZSJ7</b> | Ribosomal protein S4 X-linked OS=Gadus morhua OX=8049 PE=3 SV=1                                             | 26 | 7  |
| <b>A0A8C4ZNJ6</b> | Ribosomal protein, large, P0 OS=Gadus morhua OX=8049 GN=rplp0 PE=3 SV=1                                     | 36 | 9  |
| <b>A0A8C4YVX7</b> | RNAse Pc domain-containing protein OS=Gadus morhua OX=8049 PE=3 SV=1                                        | 27 | 3  |
| <b>A0A8C4YVK4</b> | Secreted phosphoprotein 24 OS=Gadus morhua OX=8049 PE=3 SV=1                                                | 49 | 22 |
| <b>A0A8C5AI73</b> | Secreted protein, acidic, cysteine-rich (osteonectin) OS=Gadus morhua OX=8049 GN=sparc PE=3 SV=1            | 54 | 23 |
| <b>A0A8C4ZP25</b> | Selenoprotein F OS=Gadus morhua OX=8049 PE=3 SV=1                                                           | 25 | 3  |
| <b>A0A8C4Z972</b> | Serine and arginine rich splicing factor 3b OS=Gadus morhua OX=8049 GN=srsf3b PE=4 SV=1                     | 27 | 4  |
| <b>A0A8C4ZNP4</b> | Serine protease inhibitor 2.1-like OS=Gadus morhua OX=8049 GN=LOC115553729 PE=3 SV=1                        | 25 | 9  |
| <b>Q92079</b>     | Serotransferrin (Fragment) OS=Gadus morhua OX=8049 GN=tf PE=2 SV=1                                          | 57 | 87 |
| <b>A0A8C5AT89</b> | SERPIN domain-containing protein OS=Gadus morhua OX=8049 PE=3 SV=1                                          | 42 | 45 |
| <b>A0A8C5D2V1</b> | SERPIN domain-containing protein OS=Gadus morhua OX=8049 PE=3 SV=1                                          | 44 | 59 |
| <b>A0A8C4YVJ7</b> | Serpin peptidase inhibitor, clade C (antithrombin), member 1 OS=Gadus morhua OX=8049 GN=serpincl1 PE=3 SV=1 | 36 | 16 |



|                   |                                                                                                |    |      |
|-------------------|------------------------------------------------------------------------------------------------|----|------|
| <b>A0A8C4ZHL1</b> | Serpin peptidase inhibitor, clade G (C1 inhibitor), member 1 OS=Gadus morhua OX=8049 PE=3 SV=1 | 22 | 17   |
| <b>A0A8C5AKI2</b> | Sodium/potassium-transporting ATPase subunit beta OS=Gadus morhua OX=8049 GN=atp1b1b PE=3 SV=1 | 42 | 21   |
| <b>A0A8C4ZJ74</b> | Splicing factor, arginine/serine-rich 1 OS=Gadus morhua OX=8049 GN=LOC115547035 PE=3 SV=1      | 28 | 5    |
| <b>A0A8C4ZL50</b> | Superoxide dismutase [Cu-Zn] OS=Gadus morhua OX=8049 GN=sod1 PE=3 SV=1                         | 38 | 5    |
| <b>A0A8C5C6U5</b> | Syndecan binding protein (syntenin) 2 OS=Gadus morhua OX=8049 GN=sdcbp2 PE=4 SV=1              | 25 | 10   |
| <b>A0A8C5AFL5</b> | Tectorin alpha OS=Gadus morhua OX=8049 PE=4 SV=1                                               | 59 | 1500 |
| <b>A0A8C4ZVQ3</b> | Tectorin beta OS=Gadus morhua OX=8049 PE=4 SV=1                                                | 42 | 84   |
| <b>A0A8C4Z2M4</b> | Tetraspanin OS=Gadus morhua OX=8049 GN=cd81a PE=3 SV=1                                         | 23 | 7    |
| <b>A0A8C5FEZ3</b> | Thrombospondin 1b OS=Gadus morhua OX=8049 GN=thbs1b PE=3 SV=1                                  | 27 | 37   |
| <b>A0A8C4Z0M0</b> | Transgelin OS=Gadus morhua OX=8049 GN=TAGLN PE=3 SV=1                                          | 24 | 4    |
| <b>A0A8C4Z237</b> | Transitional endoplasmic reticulum ATPase OS=Gadus morhua OX=8049 GN=vcp PE=3 SV=1             | 37 | 24   |
| <b>A0A8C4ZM89</b> | Triosephosphate isomerase OS=Gadus morhua OX=8049 PE=3 SV=1                                    | 49 | 16   |
| <b>A0A8C5CUN9</b> | Tropomyosin 4a OS=Gadus morhua OX=8049 GN=TPM4 PE=3 SV=1                                       | 28 | 6    |
| <b>A0A8C4ZKE4</b> | Tropomyosin alpha-3 chain-like OS=Gadus morhua OX=8049 GN=LOC115554335 PE=3 SV=1               | 40 | 12   |
| <b>A0A8C5AZ29</b> | Tubulin alpha chain OS=Gadus morhua OX=8049 GN=LOC115559022 PE=3 SV=1                          | 41 | 55   |
| <b>A0A8C4ZP37</b> | Tubulin beta chain OS=Gadus morhua OX=8049 GN=tubb5 PE=3 SV=1                                  | 63 | 83   |
| <b>A0A8C4Z8U4</b> | Tubulin beta chain OS=Gadus morhua OX=8049 GN=tubb6 PE=3 SV=1                                  | 55 | 45   |
| <b>Q56TU0</b>     | Type-4 ice-structuring protein OS=Gadus morhua OX=8049 PE=2 SV=1                               | 69 | 17   |
| <b>A0A8C4Z6C0</b> | Vitronectin b OS=Gadus morhua OX=8049 GN=vtnb PE=4 SV=1                                        | 21 | 12   |

\* psms= Peptide Spectrum Matches

OS=Organism Name

OX=Organism Identifier

PE=Protein Existence

SV=SequenceVersion



Table S6. According to the complete details of the protein description, the male Atlantic Cod (*Gadus morhua*) has **138** unique.

| Accession  | Description                                                                                                  | Sequence coverage | psms * |
|------------|--------------------------------------------------------------------------------------------------------------|-------------------|--------|
| A0A8C5FET6 | 26S proteasome regulatory subunit 7 OS=Gadus morhua OX=8049 GN=PSMC2 PE=3 SV=1                               | 21                | 9      |
| A0A8C5BPU1 | 2-oxoisovalerate dehydrogenase subunit alpha OS=Gadus morhua OX=8049 GN=bckdha PE=3 SV=1                     | 25                | 5      |
| A0A8C4ZUE8 | 40S ribosomal protein S12 OS=Gadus morhua OX=8049 GN=rps12 PE=3 SV=1                                         | 35                | 3      |
| A0A8C4ZAR8 | 40S ribosomal protein S15 OS=Gadus morhua OX=8049 GN=rps15 PE=3 SV=1                                         | 23                | 2      |
| A0A8C4ZM80 | 40S ribosomal protein S23 OS=Gadus morhua OX=8049 GN=rps23 PE=3 SV=1                                         | 21                | 3      |
| A0A8C4ZT25 | 60S acidic ribosomal protein P2 OS=Gadus morhua OX=8049 PE=3 SV=1                                            | 28                | 2      |
| A0A8C4ZK93 | 60S ribosomal protein L14 OS=Gadus morhua OX=8049 GN=rpl14 PE=3 SV=1                                         | 25                | 3      |
| A0A8C4Z3G5 | 60S ribosomal protein L27a OS=Gadus morhua OX=8049 GN=rpl27a PE=3 SV=1                                       | 28                | 2      |
| A0A8C5F6P1 | 60S ribosomal protein L34 OS=Gadus morhua OX=8049 GN=RPL34 PE=3 SV=1                                         | 28                | 4      |
| A0A8C5CMP3 | 60S ribosomal protein L8 OS=Gadus morhua OX=8049 GN=rpl8 PE=3 SV=1                                           | 23                | 4      |
| A0A8C5B0N5 | 72 kDa type IV collagenase OS=Gadus morhua OX=8049 PE=3 SV=1                                                 | 34                | 29     |
| A0A8C5F947 | A20-type domain-containing protein OS=Gadus morhua OX=8049 PE=4 SV=1                                         | 21                | 2      |
| A0A8C5C4N4 | Acetyl-CoA acetyltransferase 1 OS=Gadus morhua OX=8049 GN=acat1 PE=3 SV=1                                    | 34                | 8      |
| A0A8C5F8Z6 | Acidic (leucine-rich) nuclear phosphoprotein 32 family, member B OS=Gadus morhua OX=8049 GN=anp32b PE=3 SV=1 | 30                | 11     |
| A0A8C5ADH8 | Aconitate hydratase, mitochondrial OS=Gadus morhua OX=8049 GN=ACO2 PE=3 SV=1                                 | 33                | 21     |
| A0A8C5FBY3 | Aconitate hydratase, mitochondrial OS=Gadus morhua OX=8049 PE=3 SV=1                                         | 21                | 13     |
| A0A8C5AWI2 | Actin, alpha cardiac OS=Gadus morhua OX=8049 GN=LOC115544317 PE=3 SV=1                                       | 34                | 18     |
| A0A8C5FJI3 | Actin, beta 1 OS=Gadus morhua OX=8049 PE=3 SV=1                                                              | 53                | 24     |
| A0A8C5F5V1 | Adaptor related protein complex 3 subunit sigma 1 OS=Gadus morhua OX=8049 GN=ap3s1 PE=3 SV=1                 | 24                | 4      |
| A0A8C4YYC8 | ADP/ATP translocase OS=Gadus morhua OX=8049 GN=si:dkey-251i10.1 PE=3 SV=1                                    | 23                | 7      |
| A0A8C5FQM0 | ADP-ribosylation factor OS=Gadus morhua OX=8049 GN=arf3a PE=3 SV=1                                           | 23                | 4      |
| A0A8C5AEV9 | Aldehyde dehydrogenase 1 family, member A3 OS=Gadus morhua OX=8049 GN=aldh1a3 PE=3 SV=1                      | 32                | 14     |
| A0A8C5BZ34 | Alpha-2-macroglobulin-like OS=Gadus morhua OX=8049 GN=LOC115560909 PE=3 SV=1                                 | 23                | 31     |
| A0A8C4ZUJ5 | Aminoacyl-tRNA hydrolase OS=Gadus morhua OX=8049 GN=ptrh2 PE=4 SV=1                                          | 28                | 2      |

|                   |                                                                                                          |    |    |
|-------------------|----------------------------------------------------------------------------------------------------------|----|----|
| <b>A0A8C4Z1Z7</b> | ATP synthase subunit b OS=Gadus morhua OX=8049<br>GN=atp5pb PE=3 SV=1                                    | 37 | 13 |
| <b>A0A8C4ZKE9</b> | ATP synthase subunit d, mitochondrial OS=Gadus morhua<br>OX=8049 GN=atp5pd PE=3 SV=1                     | 23 | 3  |
| <b>A0A8C5FSE6</b> | ATP synthase subunit e, mitochondrial OS=Gadus morhua<br>OX=8049 GN=atp5me PE=3 SV=1                     | 30 | 2  |
| <b>A0A8C5F8Y0</b> | ATP synthase subunit O, mitochondrial OS=Gadus morhua<br>OX=8049 PE=3 SV=1                               | 33 | 7  |
| <b>A0A8C4ZPT6</b> | ATP synthase subunit OS=Gadus morhua OX=8049<br>GN=atp5l PE=3 SV=1                                       | 22 | 2  |
| <b>A0A8C4Z154</b> | ATP synthase-coupling factor 6, mitochondrial OS=Gadus<br>morhua OX=8049 GN=atp5pf PE=3 SV=1             | 25 | 3  |
| <b>A0A8C5FR97</b> | AU RNA binding protein/enoyl-CoA hydratase OS=Gadus<br>morhua OX=8049 GN=auh PE=3 SV=1                   | 21 | 6  |
| <b>A0A8C4ZJ41</b> | B9 protein domain 1 OS=Gadus morhua OX=8049<br>GN=b9d1 PE=4 SV=1                                         | 37 | 3  |
| <b>A0A8C4ZVU2</b> | Bulb-type lectin domain-containing protein OS=Gadus<br>morhua OX=8049 PE=4 SV=1                          | 31 | 3  |
| <b>A8CZB9</b>     | Carbonyl reductase (NADPH) OS=Gadus morhua<br>OX=8049 GN=cbr1 PE=2 SV=1                                  | 43 | 12 |
| <b>A0A8C5C8Y3</b> | Casein kinase II subunit alpha-like OS=Gadus morhua<br>OX=8049 GN=LOC115545522 PE=3 SV=1                 | 22 | 6  |
| <b>A0A0D3MJC9</b> | Cathelicidin 1 OS=Gadus morhua OX=8049 PE=4 SV=1                                                         | 26 | 4  |
| <b>A0A8C5A2Y8</b> | Cell division cycle 42, like OS=Gadus morhua OX=8049<br>GN=cdc42l PE=4 SV=1                              | 29 | 3  |
| <b>A0A8C4ZLQ2</b> | Chitinase, di-N-acetyl- OS=Gadus morhua OX=8049<br>GN=ctbs PE=3 SV=1                                     | 31 | 8  |
| <b>A0A8C5CT12</b> | Chloride intracellular channel protein OS=Gadus morhua<br>OX=8049 GN=clic4 PE=3 SV=1                     | 33 | 7  |
| <b>A0A8C5FGY4</b> | Chromosome 4 C7orf57 homolog OS=Gadus morhua<br>OX=8049 GN=c4h7orf57 PE=4 SV=1                           | 22 | 3  |
| <b>A0A8C4Z6P9</b> | Citrate synthase OS=Gadus morhua OX=8049 GN=cs<br>PE=3 SV=1                                              | 36 | 14 |
| <b>A0A8C5BRD9</b> | Clathrin heavy chain OS=Gadus morhua OX=8049<br>GN=LOC115561405 PE=3 SV=1                                | 24 | 34 |
| <b>A0A8C5FF90</b> | Clathrin heavy chain OS=Gadus morhua OX=8049 PE=3<br>SV=1                                                | 29 | 46 |
| <b>A0A8C5CSC6</b> | Cochlin OS=Gadus morhua OX=8049 PE=4 SV=1                                                                | 41 | 16 |
| <b>A0A8C5CG95</b> | Cofilin 1 OS=Gadus morhua OX=8049 PE=3 SV=1                                                              | 32 | 3  |
| <b>K7P8I8</b>     | Corticotropin-releasing hormone (Fragment) OS=Gadus<br>morhua OX=8049 PE=2 SV=1                          | 28 | 2  |
| <b>A0A8C4ZSV3</b> | Creatine kinase OS=Gadus morhua OX=8049<br>GN=LOC115551044 PE=3 SV=1                                     | 24 | 8  |
| <b>A0A8C5C7W7</b> | Cytochrome b-c1 complex subunit 2, mitochondrial<br>OS=Gadus morhua OX=8049 GN=LOC115530818 PE=4<br>SV=1 | 21 | 9  |
| <b>A0A8C4ZDC3</b> | Cytochrome b-c1 complex subunit 7 OS=Gadus morhua<br>OX=8049 GN=LOC115535545 PE=3 SV=1                   | 39 | 2  |
| <b>A0A8C4Z0L1</b> | Cytochrome c oxidase subunit 4 OS=Gadus morhua<br>OX=8049 GN=LOC115558779 PE=3 SV=1                      | 31 | 5  |
| <b>A0A8C5F4J1</b> | Cytochrome c oxidase subunit OS=Gadus morhua<br>OX=8049 GN=LOC115553495 PE=3 SV=1                        | 36 | 7  |
| <b>A0A8C5FIW7</b> | Cytoskeleton associated protein 4 OS=Gadus morhua<br>OX=8049 PE=4 SV=1                                   | 27 | 9  |

|                   |                                                                                                                          |    |    |
|-------------------|--------------------------------------------------------------------------------------------------------------------------|----|----|
| <b>A0A8C5B153</b> | Dihydrolipoamide acetyltransferase component of pyruvate dehydrogenase complex OS=Gadus morhua OX=8049 GN=dbt PE=3 SV=1  | 31 | 8  |
| <b>A0A8C5AX27</b> | Dolichyl-diphosphooligosaccharide--protein glycosyltransferase 48 kDa subunit OS=Gadus morhua OX=8049 GN=ddost PE=3 SV=1 | 29 | 7  |
| <b>A0A8C5CWW4</b> | Dynein light chain OS=Gadus morhua OX=8049 GN=dylnl2a PE=3 SV=1                                                          | 38 | 2  |
| <b>A0A8C4ZFD7</b> | Dynein light chain roadblock OS=Gadus morhua OX=8049 PE=3 SV=1                                                           | 43 | 2  |
| <b>A0A8C4Z6G9</b> | EH-domain containing 1a OS=Gadus morhua OX=8049 PE=4 SV=1                                                                | 32 | 13 |
| <b>A0A8C4ZCU6</b> | Electron transfer flavoprotein subunit beta OS=Gadus morhua OX=8049 GN=etfb PE=3 SV=1                                    | 22 | 5  |
| <b>A8CZC9</b>     | Elongation factor 1-alpha OS=Gadus morhua OX=8049 PE=2 SV=1                                                              | 28 | 17 |
| <b>A0A8C4ZJE4</b> | Elongation factor 1-beta OS=Gadus morhua OX=8049 GN=eef1b2 PE=3 SV=1                                                     | 32 | 5  |
| <b>A0A8C5B9Q5</b> | Eukaryotic translation initiation factor 4A1A OS=Gadus morhua OX=8049 GN=eif4a1a PE=3 SV=1                               | 35 | 12 |
| <b>A0A8C5FNL2</b> | Eukaryotic translation initiation factor 4H OS=Gadus morhua OX=8049 PE=4 SV=1                                            | 29 | 4  |
| <b>A0A8C4YZH3</b> | Ezrin b OS=Gadus morhua OX=8049 PE=4 SV=1                                                                                | 24 | 17 |
| <b>A0A8C5FDF8</b> | F-actin-capping protein subunit beta OS=Gadus morhua OX=8049 GN=capzb PE=3 SV=1                                          | 22 | 4  |
| <b>A0A8C5BE81</b> | Fatty acid-binding protein, heart-like OS=Gadus morhua OX=8049 GN=LOC115535843 PE=3 SV=1                                 | 29 | 2  |
| <b>A0A8C5AUG4</b> | Ferritin OS=Gadus morhua OX=8049 GN=fth1b PE=3 SV=1                                                                      | 35 | 4  |
| <b>A0A8C5CSQ7</b> | Fetuin B OS=Gadus morhua OX=8049 GN=fetub PE=4 SV=1                                                                      | 30 | 25 |
| <b>A0A8C4ZAZ7</b> | Fib_alpha domain-containing protein OS=Gadus morhua OX=8049 PE=4 SV=1                                                    | 26 | 16 |
| <b>A0A8C4YTJ7</b> | Fibronectin OS=Gadus morhua OX=8049 GN=fn1b PE=4 SV=1                                                                    | 21 | 47 |
| <b>A0A8C4Z1C2</b> | Filamin B OS=Gadus morhua OX=8049 GN=FLNB PE=3 SV=1                                                                      | 21 | 44 |
| <b>A0A8C5B536</b> | Fish-egg lectin-like OS=Gadus morhua OX=8049 GN=LOC115543029 PE=4 SV=1                                                   | 23 | 2  |
| <b>A0A8C5A4T9</b> | Glutamate dehydrogenase OS=Gadus morhua OX=8049 GN=glud1b PE=3 SV=1                                                      | 21 | 7  |
| <b>A0A8C5FRQ7</b> | Glyceraldehyde-3-phosphate dehydrogenase OS=Gadus morhua OX=8049 PE=3 SV=1                                               | 29 | 10 |
| <b>A0A8C5CU97</b> | H(+)-transporting two-sector ATPase OS=Gadus morhua OX=8049 GN=LOC115547679 PE=3 SV=1                                    | 25 | 13 |
| <b>A0A8C5FAA0</b> | Histone H2B OS=Gadus morhua OX=8049 GN=H2BE1 PE=3 SV=1                                                                   | 39 | 5  |
| <b>A0A8C5ALM2</b> | IF rod domain-containing protein OS=Gadus morhua OX=8049 PE=4 SV=1                                                       | 34 | 16 |
| <b>A0A8C4Z2D5</b> | Integral membrane protein 2 OS=Gadus morhua OX=8049 GN=ITM2B PE=3 SV=1                                                   | 39 | 6  |
| <b>A0A8C5CRJ4</b> | Isocitrate dehydrogenase [NAD] subunit, mitochondrial OS=Gadus morhua OX=8049 GN=LOC115558864 PE=3 SV=1                  | 22 | 9  |

|                   |                                                                                                          |    |    |
|-------------------|----------------------------------------------------------------------------------------------------------|----|----|
| <b>A0A8C5BYC4</b> | Isocitrate dehydrogenase [NAD] subunit, mitochondrial OS=Gadus morhua OX=8049 PE=3 SV=1                  | 22 | 5  |
| <b>A0A8C5FKH1</b> | LAM_G_DOMAIN domain-containing protein OS=Gadus morhua OX=8049 PE=4 SV=1                                 | 24 | 2  |
| <b>A0A8C5A0N8</b> | Legumain OS=Gadus morhua OX=8049 PE=3 SV=1                                                               | 24 | 8  |
| <b>A0A8C5CP04</b> | Leukocyte cell-derived chemotaxin 2 like OS=Gadus morhua OX=8049 GN=lect2l PE=3 SV=1                     | 39 | 4  |
| <b>A0A8C4Z4T0</b> | LIM domain only 4a OS=Gadus morhua OX=8049 GN=lmo4a PE=4 SV=1                                            | 22 | 3  |
| <b>A0A8C5BCZ5</b> | Lipase, gastric OS=Gadus morhua OX=8049 GN=lipf PE=4 SV=1                                                | 23 | 7  |
| <b>A0A8C5D2A7</b> | L-lactate dehydrogenase OS=Gadus morhua OX=8049 GN=LOC115541542 PE=3 SV=1                                | 23 | 12 |
| <b>A0A8C5FMA7</b> | Lumican OS=Gadus morhua OX=8049 GN=lum PE=3 SV=1                                                         | 22 | 5  |
| <b>A0A8C5ANV1</b> | MAX dimerization protein 3 OS=Gadus morhua OX=8049 GN=mx3 PE=4 SV=1                                      | 22 | 2  |
| <b>A0A7S5GEE2</b> | MHC class I antigen (Fragment) OS=Gadus morhua OX=8049 PE=4 SV=1                                         | 54 | 2  |
| <b>A0A7S5GEL2</b> | MHC class I antigen (Fragment) OS=Gadus morhua OX=8049 PE=4 SV=1                                         | 40 | 2  |
| <b>A0A8C5ABC3</b> | Mitochondrial ribosomal protein L12 OS=Gadus morhua OX=8049 GN=mrpl12 PE=3 SV=1                          | 22 | 2  |
| <b>A0A8C5BLV9</b> | Mitochondrial ribosomal protein S28 OS=Gadus morhua OX=8049 PE=4 SV=1                                    | 26 | 2  |
| <b>A0A8C5AZT6</b> | Myosin, heavy chain 9b, non-muscle OS=Gadus morhua OX=8049 GN=myh9b PE=3 SV=1                            | 24 | 40 |
| <b>A0A8C4Z4B3</b> | NADH dehydrogenase [ubiquinone] 1 alpha subcomplex subunit 5 OS=Gadus morhua OX=8049 GN=ndufa5 PE=3 SV=1 | 28 | 2  |
| <b>A0A8C5C1Y0</b> | NEDD8-activating enzyme E1 catalytic subunit OS=Gadus morhua OX=8049 GN=UBA3 PE=3 SV=1                   | 22 | 2  |
| <b>A0A8C4Z782</b> | Nucleobindin 1 OS=Gadus morhua OX=8049 GN=nucb1 PE=4 SV=1                                                | 29 | 13 |
| <b>A0A8C5FK28</b> | Nucleolin OS=Gadus morhua OX=8049 PE=4 SV=1                                                              | 36 | 19 |
| <b>A0A8C4ZN86</b> | Palmitoyl-protein thioesterase 1 OS=Gadus morhua OX=8049 GN=ppt1 PE=3 SV=1                               | 26 | 7  |
| <b>A0A8C5CXJ9</b> | Peptidase S1 domain-containing protein OS=Gadus morhua OX=8049 PE=4 SV=1                                 | 28 | 3  |
| <b>A0A8C4Z706</b> | Peptidyl-prolyl cis-trans isomerase OS=Gadus morhua OX=8049 GN=pin1 PE=4 SV=1                            | 28 | 2  |
| <b>A0A8C4ZTM6</b> | Peroxiredoxin-6 OS=Gadus morhua OX=8049 GN=prdx6 PE=3 SV=1                                               | 21 | 3  |
| <b>A0A8C5FU23</b> | Procollagen-lysine 5-dioxygenase OS=Gadus morhua OX=8049 GN=plod3 PE=4 SV=1                              | 28 | 17 |
| <b>A0A8C5AMS0</b> | Programmed cell death 6 interacting protein OS=Gadus morhua OX=8049 PE=4 SV=1                            | 36 | 29 |
| <b>A0A8C4ZDU4</b> | Proteasome inhibitor PI31 subunit OS=Gadus morhua OX=8049 GN=psmf1 PE=3 SV=1                             | 26 | 3  |
| <b>A0A8C5B4I7</b> | Protein AMBP OS=Gadus morhua OX=8049 GN=LOC115538969 PE=3 SV=1                                           | 26 | 8  |
| <b>A0A8C4ZX28</b> | Protein disulfide-isomerase A6 OS=Gadus morhua OX=8049 GN=pdia6 PE=3 SV=1                                | 24 | 9  |
| <b>A0A8C5CLM6</b> | Protein disulfide-isomerase OS=Gadus morhua OX=8049 GN=pdia4 PE=3 SV=1                                   | 23 | 13 |

|                   |                                                                                                                                    |    |    |
|-------------------|------------------------------------------------------------------------------------------------------------------------------------|----|----|
| <b>A0A8C5CWX1</b> | Pyruvate carboxylase OS=Gadus morhua OX=8049 GN=pc PE=4 SV=1                                                                       | 25 | 24 |
| <b>A0A8C4YUX8</b> | Pyruvate dehydrogenase E1 component subunit beta OS=Gadus morhua OX=8049 GN=pdhb PE=4 SV=1                                         | 36 | 13 |
| <b>A0A8C5F477</b> | Rab GDP dissociation inhibitor OS=Gadus morhua OX=8049 GN=GDI2 PE=3 SV=1                                                           | 26 | 9  |
| <b>A0A8C4ZBY9</b> | RAB1A, member RAS oncogene family OS=Gadus morhua OX=8049 GN=RAB1A PE=4 SV=1                                                       | 33 | 9  |
| <b>A0A8C5FV19</b> | Ras-related protein Rab-11B-like OS=Gadus morhua OX=8049 GN=LOC115555445 PE=4 SV=1                                                 | 30 | 5  |
| <b>A0A8C5CXI4</b> | Rho GDP-dissociation inhibitor 1-like OS=Gadus morhua OX=8049 GN=ARHGDI1A PE=3 SV=1                                                | 34 | 4  |
| <b>A0A8C5FD21</b> | Ribosomal protein L4 OS=Gadus morhua OX=8049 GN=rpl4 PE=3 SV=1                                                                     | 21 | 7  |
| <b>A0A8C5ARR7</b> | Ribosomal protein OS=Gadus morhua OX=8049 GN=rpl10a PE=3 SV=1                                                                      | 33 | 6  |
| <b>A0A8C5F3W2</b> | Ring-box 1, E3 ubiquitin protein ligase OS=Gadus morhua OX=8049 GN=rbx1 PE=3 SV=1                                                  | 37 | 2  |
| <b>A0A8C5BRM3</b> | RNA helicase OS=Gadus morhua OX=8049 PE=3 SV=1                                                                                     | 23 | 13 |
| <b>A0A8C5A0K6</b> | Semaphorin 7A OS=Gadus morhua OX=8049 PE=4 SV=1                                                                                    | 24 | 6  |
| <b>A0A8C5BNA3</b> | Serine/threonine-protein phosphatase OS=Gadus morhua OX=8049 PE=3 SV=1                                                             | 22 | 7  |
| <b>A0A8C5C7G7</b> | Smoothelin a OS=Gadus morhua OX=8049 PE=4 SV=1                                                                                     | 25 | 2  |
| <b>A0A8C4Z4K1</b> | Sodium/potassium-transporting ATPase subunit alpha OS=Gadus morhua OX=8049 GN=atp1a1a.1 PE=3 SV=1                                  | 30 | 39 |
| <b>A0A8C5ASM5</b> | Sodium/potassium-transporting ATPase subunit alpha OS=Gadus morhua OX=8049 GN=atp1a3b PE=3 SV=1                                    | 29 | 38 |
| <b>A0A8C5A412</b> | SPATA6 domain-containing protein OS=Gadus morhua OX=8049 PE=3 SV=1                                                                 | 21 | 2  |
| <b>A0A8C5B1A4</b> | Splicing factor, arginine/serine-rich 1 OS=Gadus morhua OX=8049 GN=srsf1a PE=3 SV=1                                                | 27 | 7  |
| <b>A0A8C5BN57</b> | Tetraspanin OS=Gadus morhua OX=8049 GN=cd63 PE=3 SV=1                                                                              | 21 | 4  |
| <b>A0A8C5FD79</b> | THAP-type domain-containing protein OS=Gadus morhua OX=8049 PE=3 SV=1                                                              | 37 | 2  |
| <b>A0A8C5FED9</b> | Thioredoxin OS=Gadus morhua OX=8049 PE=3 SV=1                                                                                      | 24 | 3  |
| <b>A0A8C5BL35</b> | Thymidine phosphorylase OS=Gadus morhua OX=8049 GN=LOC115542463 PE=3 SV=1                                                          | 25 | 7  |
| <b>A0A8C5FSR6</b> | Tubulin alpha chain OS=Gadus morhua OX=8049 GN=LOC115533128 PE=3 SV=1                                                              | 47 | 54 |
| <b>A0A8C5BEP0</b> | Tubulin alpha-1A chain OS=Gadus morhua OX=8049 GN=LOC115547025 PE=3 SV=1                                                           | 48 | 45 |
| <b>A0A8C4Z3X3</b> | Tubulin beta chain OS=Gadus morhua OX=8049 GN=tubb2b PE=3 SV=1                                                                     | 55 | 73 |
| <b>A0A8C5ATU6</b> | Tubulin beta chain OS=Gadus morhua OX=8049 PE=3 SV=1                                                                               | 47 | 19 |
| <b>A0A8C4ZTF2</b> | Tyrosine 3-monooxygenase/tryptophan 5-monooxygenase activation protein, eta polypeptide OS=Gadus morhua OX=8049 GN=ywhah PE=3 SV=1 | 38 | 9  |
| <b>A0A8C4Z777</b> | U6 snRNA-associated Sm-like protein LSm4 OS=Gadus morhua OX=8049 GN=LSM4 PE=3 SV=1                                                 | 29 | 3  |
| <b>A0A8C4ZF86</b> | Ubiquitin-40S ribosomal protein S27a OS=Gadus morhua OX=8049 GN=rps27a PE=3 SV=1                                                   | 42 | 19 |

|                   |                                                                                                             |    |   |
|-------------------|-------------------------------------------------------------------------------------------------------------|----|---|
| <b>A0A8C5F9L8</b> | UMP-CMP kinase OS=Gadus morhua OX=8049<br>GN=cmpk PE=3 SV=1                                                 | 23 | 3 |
| <b>A0A8C5BGJ3</b> | Vacuolar protein sorting-associated protein 4B-like<br>OS=Gadus morhua OX=8049 GN=LOC115556024 PE=3<br>SV=1 | 23 | 5 |
| <b>A0A8C4YVQ7</b> | Vacuolar proton pump subunit B OS=Gadus morhua<br>OX=8049 GN=atp6v1ba PE=3 SV=1                             | 26 | 8 |
| <b>A0A8C5FKS7</b> | Voltage-dependent anion-selective channel protein 2<br>OS=Gadus morhua OX=8049 GN=vdac2 PE=3 SV=1           | 27 | 8 |

\* psms=8Peptide Spectrum Matches

OS=Organism Name

OX=Organism Identifier

PE=Protein Existence

SV=SequenceVersion



Table S7. According to the complete details of the protein description, the female Atlantic Cod (*Gadus morhua*) has 67 unique.

| Accession   | Description                                                                                         | Sequence coverage | psms * |
|-------------|-----------------------------------------------------------------------------------------------------|-------------------|--------|
| A0A8C4ZJE1  | 14-3-3 protein beta/alpha-like OS=Gadus morhua OX=8049 GN=LOC115534522 PE=3 SV=1                    | 22                | 8      |
| A0A8C5C8H7  | 14-3-3 protein epsilon-like OS=Gadus morhua OX=8049 GN=LOC115546836 PE=3 SV=1                       | 25                | 8      |
| A0A8C4ZDQ0  | 40S ribosomal protein S2 OS=Gadus morhua OX=8049 GN=rps2 PE=3 SV=1                                  | 27                | 6      |
| A0A8C4ZDL6  | 40S ribosomal protein S28 OS=Gadus morhua OX=8049 GN=rps28 PE=3 SV=1                                | 33                | 2      |
| A0A8C5BUC6  | 40S ribosomal protein S8 OS=Gadus morhua OX=8049 GN=rps8a PE=3 SV=1                                 | 28                | 5      |
| A0A8C5BNH7  | 60S ribosomal protein L30 OS=Gadus morhua OX=8049 GN=rpl30 PE=3 SV=1                                | 35                | 4      |
| A0A8C4Z1D1  | 60S ribosomal protein L31 OS=Gadus morhua OX=8049 GN=LOC115541599 PE=3 SV=1                         | 33                | 3      |
| A0A8C4YWG5  | Acyl-CoA synthetase family member 3 OS=Gadus morhua OX=8049 GN=ACSF3 PE=3 SV=1                      | 21                | 9      |
| cRAP_P02662 | Alpha-S1-casein OS=Bos taurus GN=CSN1S1 PE=1 SV=2                                                   | 22                | 4      |
| A0A8C5F819  | Apolipoprotein A-I-like OS=Gadus morhua OX=8049 GN=LOC115553333 PE=3 SV=1                           | 21                | 6      |
| A0A8C4ZK56  | Arrestin domain containing 1a OS=Gadus morhua OX=8049 GN=arrdc1a PE=3 SV=1                          | 22                | 7      |
| A0A8C5A632  | BRICHOS domain containing 5 OS=Gadus morhua OX=8049 GN=bricd5 PE=4 SV=1                             | 21                | 6      |
| A0A8C5BSR3  | Calmodulin 2a (phosphorylase kinase, delta) OS=Gadus morhua OX=8049 GN=calm1b PE=4 SV=1             | 23                | 14     |
| A0A8C5CK47  | CARD domain-containing protein OS=Gadus morhua OX=8049 PE=4 SV=1                                    | 30                | 3      |
| A0A8C5F9E5  | Cathepsin H OS=Gadus morhua OX=8049 GN=CTSH PE=3 SV=1                                               | 25                | 6      |
| A0A8C4ZD84  | Creatine kinase OS=Gadus morhua OX=8049 GN=ckbb PE=3 SV=1                                           | 27                | 7      |
| A0A8C4Z9J0  | DHRS-12_like_SDR_c-like domain-containing protein OS=Gadus morhua OX=8049 GN=LOC115561183 PE=4 SV=1 | 25                | 8      |
| A0A8C5F5J6  | Eosinophil peroxidase-like OS=Gadus morhua OX=8049 GN=LOC115542730 PE=4 SV=1                        | 31                | 20     |
| A0A8C4Z8T5  | Eukaryotic translation initiation factor 5A OS=Gadus morhua OX=8049 GN=EIF5A PE=3 SV=1              | 22                | 3      |
| A0A8C4Z775  | Follistatin-like 1b OS=Gadus morhua OX=8049 PE=4 SV=1                                               | 49                | 27     |
| A0A8C4ZQN2  | FTP domain-containing protein OS=Gadus morhua OX=8049 PE=4 SV=1                                     | 22                | 2      |
| A0A8C5BES6  | Heme-binding protein 2-like OS=Gadus morhua OX=8049 GN=LOC115538475 PE=3 SV=1                       | 21                | 3      |
| A0A8C4ZAA7  | Histone H2A OS=Gadus morhua OX=8049 GN=LOC115529517 PE=3 SV=1                                       | 31                | 4      |
| A0A8C5CJK0  | Histone H3 OS=Gadus morhua OX=8049 PE=3 SV=1                                                        | 36                | 3      |
| A0A8C4Z0D0  | Interferon stimulated exonuclease gene 20-like 2 OS=Gadus morhua OX=8049 GN=isg20l2 PE=4 SV=1       | 22                | 34     |
| A0A8C4ZH54  | Keratin 15 OS=Gadus morhua OX=8049 PE=4 SV=1                                                        | 39                | 25     |
| A0A8C5F7T9  | Keratin, type I cytoskeletal 13-like OS=Gadus morhua OX=8049 GN=LOC115540539 PE=4 SV=1              | 29                | 14     |
| A0A8C5BJ41  | Keratin, type II cytoskeletal 8-like OS=Gadus morhua OX=8049 GN=LOC115556866 PE=3 SV=1              | 38                | 38     |



|                   |                                                                                                          |    |    |
|-------------------|----------------------------------------------------------------------------------------------------------|----|----|
| <b>A0A8C5F855</b> | Lysozyme g OS=Gadus morhua OX=8049 GN=LOC115556755 PE=3 SV=1                                             | 24 | 3  |
| <b>B9TU22</b>     | Lysozyme g OS=Gadus morhua OX=8049 PE=1 SV=1                                                             | 51 | 13 |
| <b>A0A8C5A4I1</b> | Macrophage migration inhibitory factor OS=Gadus morhua OX=8049 GN=mif PE=3 SV=1                          | 44 | 6  |
| <b>A0A8C4Z1X2</b> | Midkine a OS=Gadus morhua OX=8049 GN=mdka PE=3 SV=1                                                      | 22 | 2  |
| <b>A0A8C5B7J2</b> | Multiple inositol polyphosphate phosphatase 1 OS=Gadus morhua OX=8049 GN=LOC115559836 PE=3 SV=1          | 30 | 19 |
| <b>A0A8C5B8E2</b> | Myosin light chain, phosphorylatable, fast skeletal muscle a OS=Gadus morhua OX=8049 GN=mylpfa PE=4 SV=1 | 31 | 7  |
| <b>A0A8C4YT70</b> | Myosin, light chain 1, alkali; skeletal, fast OS=Gadus morhua OX=8049 GN=myl1 PE=4 SV=1                  | 26 | 4  |
| <b>A0A8C5F8R7</b> | N-alpha-acetyltransferase 50, NatE catalytic subunit OS=Gadus morhua OX=8049 GN=naa50 PE=4 SV=1          | 21 | 2  |
| <b>A0A8C4YUX9</b> | Nascent polypeptide associated complex subunit alpha OS=Gadus morhua OX=8049 GN=naca PE=4 SV=1           | 27 | 8  |
| <b>A0A8C5B4W1</b> | Nucleobindin-1 OS=Gadus morhua OX=8049 GN=nucb1 PE=3 SV=1                                                | 44 | 23 |
| <b>A0A8C5F6D1</b> | P1, F-box associated domain containing OS=Gadus morhua OX=8049 GN=ncrp1 PE=4 SV=1                        | 22 | 4  |
| <b>A0A8C5FH27</b> | Parvalbumin OS=Gadus morhua OX=8049 GN=LOC115537726 PE=3 SV=1                                            | 34 | 4  |
| <b>A0A8C5APQ5</b> | PDZ domain-containing protein OS=Gadus morhua OX=8049 PE=4 SV=1                                          | 25 | 3  |
| <b>A0A8C5BVB7</b> | Pentraxin 3, long a OS=Gadus morhua OX=8049 GN=PTX3 PE=4 SV=1                                            | 25 | 13 |
| <b>G0XNX4</b>     | Peptidyl-prolyl cis-trans isomerase OS=Gadus morhua OX=8049 PE=2 SV=1                                    | 31 | 5  |
| <b>A0A8C4Z931</b> | Phosphoglycerate mutase OS=Gadus morhua OX=8049 PE=3 SV=1                                                | 25 | 7  |
| <b>A0A8C5FUV6</b> | Profilin OS=Gadus morhua OX=8049 GN=LOC115529555 PE=3 SV=1                                               | 21 | 3  |
| <b>A0A8C4Z2Y9</b> | Profilin OS=Gadus morhua OX=8049 GN=LOC115555837 PE=3 SV=1                                               | 30 | 3  |
| <b>A0A8C4ZUG6</b> | Protein S100 OS=Gadus morhua OX=8049 GN=LOC115535334 PE=3 SV=1                                           | 24 | 3  |
| <b>A0A8C4ZS69</b> | RAB10, member RAS oncogene family OS=Gadus morhua OX=8049 GN=rab10 PE=4 SV=1                             | 24 | 4  |
| <b>A0A8C5FJA9</b> | Ras-related protein Rab-11B OS=Gadus morhua OX=8049 GN=LOC115549210 PE=4 SV=1                            | 39 | 4  |
| <b>A0A8C4ZCJ5</b> | Reactive oxygen species modulator 1 OS=Gadus morhua OX=8049 GN=romo1 PE=3 SV=1                           | 72 | 4  |
| <b>Q8JHA8</b>     | Ribosomal protein L15 (Fragment) OS=Gadus morhua OX=8049 PE=2 SV=1                                       | 21 | 3  |
| <b>A0A8C5FU09</b> | Ribosomal protein L18 OS=Gadus morhua OX=8049 PE=3 SV=1                                                  | 25 | 3  |
| <b>A0A8C5AFU2</b> | Ribosomal_S7 domain-containing protein OS=Gadus morhua OX=8049 PE=3 SV=1                                 | 21 | 4  |
| <b>A0A8C5C2F7</b> | RNA binding protein, mRNA processing factor 2b OS=Gadus morhua OX=8049 PE=4 SV=1                         | 21 | 2  |
| <b>A0A8C5A2J8</b> | RNA helicase OS=Gadus morhua OX=8049 GN=eif4a1a PE=3 SV=1                                                | 26 | 9  |
| <b>A0A8C4Z936</b> | Serine and arginine rich splicing factor 9 OS=Gadus morhua OX=8049 GN=srsf9 PE=4 SV=1                    | 23 | 4  |
| <b>A0A8C5CQP1</b> | Superoxide dismutase [Mn], mitochondrial OS=Gadus morhua OX=8049 PE=3 SV=1                               | 27 | 3  |
| <b>A0A8C5F9N4</b> | Transgelin OS=Gadus morhua OX=8049 GN=LOC115547387 PE=3 SV=1                                             | 21 | 4  |
| <b>A0A8C5CNE1</b> | Tropomyosin 1 (alpha) OS=Gadus morhua OX=8049 GN=TPM1 PE=3 SV=1                                          | 38 | 24 |
| <b>A0A8C5BX34</b> | Tropomyosin alpha-1 chain-like OS=Gadus morhua OX=8049 GN=LOC115548938 PE=3 SV=1                         | 38 | 16 |
| <b>A0A8C5AXJ8</b> | Tropomyosin alpha-1 chain-like OS=Gadus morhua OX=8049 GN=LOC115558702 PE=3 SV=1                         | 48 | 19 |
| <b>A0A8C5BRB8</b> | Tubulin alpha chain OS=Gadus morhua OX=8049 GN=LOC115533160 PE=3 SV=1                                    | 41 | 31 |

|                   |                                                                                                                                         |    |    |
|-------------------|-----------------------------------------------------------------------------------------------------------------------------------------|----|----|
| <b>A0A8C5B8B8</b> | Tubulin alpha chain OS=Gadus morhua OX=8049 PE=3 SV=1                                                                                   | 30 | 29 |
| <b>Q9YHC3</b>     | Tubulin beta-1 chain OS=Gadus morhua OX=8049 PE=2 SV=1                                                                                  | 50 | 57 |
| <b>A0A8C4ZDU6</b> | Tyrosine 3-monooxygenase/tryptophan 5-monooxygenase activation protein, theta polypeptide b OS=Gadus morhua OX=8049 GN=ywhaqb PE=3 SV=1 | 34 | 11 |
| <b>A0A8C5B7B5</b> | Ubiquitin carboxyl-terminal hydrolase OS=Gadus morhua OX=8049 PE=3 SV=1                                                                 | 25 | 5  |
| <b>A0A8C5BWN9</b> | Ubiquitin conjugating enzyme E2 L3 OS=Gadus morhua OX=8049 GN=UBE2L3 PE=3 SV=1                                                          | 35 | 2  |

\* psms= Peptide Spectrum Matches

OS=Organism Name

OX=Organism Identifier

PE=Protein Existence

SV=SequenceVersion
